# Supplementary material for: Spatial profiling of gastric cancer patient-matched primary and locoregional metastases reveals principles of tumour dissemination
Source: PubMed Central journal article supplement — Gut. 2020 Nov 23;70(10):1823–32. doi: 10.1136/gutjnl-2020-320805 (PMC8458060; doi:10.1136/gutjnl-2020-320805), 2020-11-23
Supplement: gutjnl-2020-320805supp002.pdf [file gutjnl-2020-320805supp002.pdf]

| Genes    | Angiogenesis | Cancer Metabolism | ECM Layers | ECM Remodeling | EMT | Hypoxia | Metastasis | Transcription Factor | Tumor Growth | Tumor Invasion | Internal Reference Genes |
|----------|--------------|-------------------|------------|----------------|-----|---------|------------|----------------------|--------------|----------------|--------------------------|
| AAMP     | +            |                   | +          |                |     |         |            |                      |              |                |                          |
| ABI3BP   |              |                   | +          |                |     |         |            |                      |              |                |                          |
| ACHE     |              |                   | +          |                |     |         |            |                      |              |                |                          |
| ACTG2    |              |                   |            |                |     |         | +          |                      |              |                |                          |
| ACVR1    |              |                   | +          |                |     |         |            |                      |              |                |                          |
| ACVR1C   |              |                   | +          |                |     |         |            |                      |              |                |                          |
| ACVRL1   | +            |                   |            |                |     |         |            |                      |              |                |                          |
| ADAM15   | +            |                   | +          | +              | +   |         |            |                      |              |                |                          |
| ADAM17   |              |                   | +          | +              |     | +       |            |                      |              |                |                          |
| ADAM28   |              |                   | +          | +              |     |         |            |                      |              |                |                          |
| ADAM8    | +            |                   | +          | +              |     |         |            |                      |              |                |                          |
| ADAM9    |              |                   | +          | +              |     |         |            |                      |              |                |                          |
| ADAMTS1  |              |                   | +          | +              |     |         |            |                      |              |                |                          |
| ADAMTS12 |              |                   | +          | +              |     |         |            |                      |              |                |                          |
| ADAMTS8  |              |                   | +          | +              |     |         |            |                      |              |                |                          |
| ADAP1    |              |                   | +          |                | +   |         |            |                      |              |                |                          |
| ADD1     | +            |                   | +          |                |     |         |            | +                    |              |                |                          |
| ADM2     | +            |                   |            |                |     |         |            |                      |              |                |                          |
| ADRA2B   | +            |                   | +          |                |     |         |            |                      |              |                |                          |
| AEBP1    |              |                   | +          |                |     |         |            | +                    |              |                |                          |
| AGGF1    | +            |                   |            |                |     |         |            |                      |              |                |                          |
| AGR2     |              |                   |            |                | +   |         |            |                      |              |                |                          |
| AGRN     |              |                   | +          | +              |     |         |            |                      |              |                |                          |
| AGT      | +            |                   | +          |                |     |         |            |                      |              |                |                          |
| AHNAK    |              |                   |            |                | +   |         |            |                      |              |                |                          |
| AKAP12   |              |                   | +          |                | +   |         | +          |                      |              |                |                          |
| AKAP2    |              |                   |            |                | +   |         |            |                      |              |                |                          |
| AKT1     | +            | +                 | +          |                | +   |         |            |                      |              |                |                          |
| AKT2     | +            | +                 | +          |                |     | +       |            |                      |              |                |                          |
| AKT3     | +            | +                 | +          |                | +   | +       |            |                      |              |                |                          |
| ALB      | +            |                   | +          |                |     |         |            |                      |              |                |                          |
| ALDOA    | +            | +                 |            |                |     | +       |            |                      |              |                |                          |
| ALOX5    |              |                   |            |                | +   |         |            |                      |              |                |                          |
| AMH      |              |                   |            |                |     |         |            | +                    |              |                |                          |
| ANG      | +            |                   | +          |                |     | +       |            |                      |              |                |                          |
| ANGPT1   | +            |                   |            |                |     | +       |            |                      |              |                |                          |
| ANGPT2   | +            |                   | +          |                |     | +       |            |                      |              |                |                          |
| ANGPTL2  |              |                   |            |                | +   |         |            |                      |              |                |                          |
| ANGPTL4  | +            |                   |            |                |     | +       |            |                      |              |                |                          |
| ANPEP    | +            |                   | +          |                |     |         |            |                      |              |                |                          |
| ANXA2P2  | +            |                   | +          |                |     |         |            |                      |              |                |                          |
| AP1M2    |              |                   |            |                | +   |         |            |                      |              |                |                          |
| APC      |              |                   |            |                |     |         |            |                      |              |                |                          |
| APOD     | +            |                   |            |                |     |         |            |                      |              |                |                          |
| APOE     |              |                   | +          |                |     |         |            |                      |              |                |                          |
| APOH     | +            |                   | +          |                |     |         |            |                      |              |                |                          |
| AQP1     | +            |                   | +          |                |     |         |            |                      |              |                |                          |
| ARAP2    |              |                   |            |                | +   |         |            |                      |              |                |                          |
| AREG     |              |                   | +          |                | +   |         |            |                      |              |                |                          |
| ARHGAP32 |              |                   | +          |                | +   |         |            |                      |              |                |                          |
| ARHGDI8  |              |                   |            |                | +   |         | +          |                      |              |                |                          |
| ASPN     |              |                   | +          |                | +   |         |            |                      |              |                |                          |
| ATPIF1   | +            |                   |            |                |     |         |            |                      |              |                |                          |
| B3GNT3   |              |                   | +          |                | +   |         |            |                      |              |                |                          |
| BAD      | +            |                   |            |                |     |         |            |                      |              |                |                          |
| BAG2     |              |                   |            |                | +   |         |            |                      |              |                |                          |
| BAI1     | +            |                   | +          |                |     |         |            |                      |              |                |                          |
| BAI3     | +            |                   | +          |                |     |         |            |                      |              |                |                          |
| BCAS1    |              |                   |            |                | +   |         |            |                      |              |                |                          |
| BGN      |              |                   | +          |                | +   |         |            |                      |              |                |                          |
| BICC1    |              |                   |            |                | +   |         |            |                      |              |                |                          |
| BMP4     | +            |                   |            |                |     |         |            |                      |              |                |                          |
| BMP5     |              |                   |            |                |     |         |            |                      |              |                |                          |
| BMP7     | +            |                   | +          |                | +   |         |            | +                    |              |                |                          |
| BMPER    | +            |                   |            |                |     |         |            |                      |              |                |                          |
| BMPR1A   |              |                   | +          |                |     |         |            |                      |              |                |                          |
| BMPR1B   |              |                   | +          |                |     |         |            |                      |              |                |                          |
| BMPR2    |              |                   | +          |                |     |         |            |                      |              |                |                          |
| BNC2     |              |                   | +          |                | +   |         |            |                      |              |                |                          |
| BRMS1    |              |                   |            |                |     |         | +          | +                    |              |                |                          |
| BTG1     | +            |                   |            |                |     |         |            |                      |              |                |                          |
| C1S      |              |                   |            |                | +   |         |            |                      |              |                |                          |
| C3       | +            |                   |            |                |     |         |            |                      |              |                |                          |
| C3AR1    | +            |                   | +          |                |     |         |            |                      |              |                |                          |
| CADM1    |              |                   | +          |                |     |         | +          |                      |              |                |                          |
| CALCRL   | +            |                   | +          |                |     |         |            |                      |              |                |                          |
| CALD1    |              |                   | +          |                | +   |         |            |                      |              |                |                          |
| CAMK2A   |              |                   | +          |                |     |         |            | +                    |              |                |                          |
| CAMK2B   |              |                   | +          |                |     | +       |            |                      |              |                |                          |
| CAMK2D   |              |                   | +          |                |     | +       |            |                      |              |                |                          |
| CAMP     | +            |                   |            |                |     |         |            |                      |              |                |                          |
| CASP8    | +            |                   |            | +              |     |         | +          |                      |              |                |                          |
| CAV1     | +            |                   | +          |                | +   | +       |            |                      |              |                |                          |
| CBLC     |              |                   |            |                | +   |         |            |                      |              |                |                          |
| CCBE1    | +            |                   | +          |                |     |         |            |                      |              |                |                          |
| CCDC80   |              |                   | +          |                |     |         |            |                      |              |                |                          |
| CCL11    | +            |                   | +          |                |     |         |            |                      |              |                |                          |
| CCL21    |              |                   | +          |                |     |         |            |                      |              |                |                          |
| CCL5     |              |                   |            |                |     |         |            |                      |              |                |                          |
| CCL7     |              |                   |            | +              |     |         |            |                      |              |                |                          |
| CCL8     |              |                   |            |                | +   |         |            |                      |              |                |                          |
| CCR2     | +            |                   | +          |                |     |         |            |                      |              |                |                          |
| CCR3     | +            |                   | +          |                |     |         |            |                      |              |                |                          |
| CD163    |              |                   | +          |                | +   |         |            |                      |              |                |                          |
| CD24     |              |                   | +          |                | +   | +       |            |                      |              |                |                          |
| CD2AP    |              |                   | +          |                | +   |         |            |                      |              |                |                          |
| CD34     |              |                   | +          |                |     |         |            |                      |              |                |                          |
| CD36     | +            |                   | +          | +              |     |         |            | +                    |              |                |                          |
| CD44     |              |                   | +          | +              |     |         | +          | +                    |              |                |                          |
| CD46     |              |                   | +          |                | +   |         |            |                      |              |                |                          |
| CD82     |              |                   | +          |                |     |         | +          |                      |              |                |                          |
| CDC42    | +            |                   | +          |                |     |         |            |                      |              |                |                          |
| CDH1     |              |                   | +          | +              | +   |         | +          |                      |              |                |                          |
| CDH11    |              |                   | +          |                | +   |         | +          |                      |              |                |                          |
| CDH13    | +            |                   | +          |                | +   |         |            |                      |              |                |                          |
| CDH2     |              |                   | +          |                | +   |         |            |                      |              |                |                          |
| CDK14    |              |                   | +          |                | +   |         |            |                      |              |                |                          |
| CDKN1A   |              |                   |            |                |     | +       |            |                      |              |                |                          |



|          |   |   |   |   |   |   |  |   |   |  |   |
|----------|---|---|---|---|---|---|--|---|---|--|---|
| EPCAM    |   |   | + |   | + |   |  |   | + |  |   |
| EPHA1    | + |   | + |   | + |   |  |   | + |  | + |
| EPHA2    | + |   | + |   | + |   |  |   | + |  | + |
| EPHB1    | + |   | + |   | + |   |  |   | + |  | + |
| EPHB3    | + |   | + |   | + |   |  |   | + |  | + |
| EPHB4    | + |   | + |   | + |   |  |   | + |  | + |
| EPN3     |   |   |   |   | + |   |  |   |   |  |   |
| EPS8L1   |   |   |   |   | + |   |  |   |   |  |   |
| ERBB2    | + | + | + |   | + | + |  |   | + |  |   |
| ERBB2IP  |   |   | + |   | + |   |  |   | + |  | + |
| ERBB3    |   |   | + |   | + |   |  |   | + |  | + |
| EREG     | + |   | + |   | + |   |  |   | + |  |   |
| ERMP1    |   |   | + |   | + |   |  |   | + |  |   |
| ESRP1    |   |   | + |   | + |   |  |   | + |  |   |
| ETV4     |   |   |   |   |   |   |  | + | + |  |   |
| EVI2A    |   |   | + |   | + |   |  |   |   |  |   |
| EVPL     |   |   |   |   | + |   |  |   |   |  |   |
| F11R     | + |   | + |   | + |   |  |   |   |  | + |
| F3       | + |   | + |   | + |   |  |   | + |  |   |
| FAM174B  |   |   | + |   | + |   |  |   |   |  |   |
| FAP      | + |   | + |   | + |   |  |   | + |  |   |
| FASLG    | + |   | + |   | + |   |  |   |   |  |   |
| FBLN1    |   |   | + |   | + |   |  |   |   |  |   |
| FBLN5    | + |   | + |   | + |   |  |   |   |  | + |
| FBN1     |   |   | + |   | + |   |  |   |   |  |   |
| FBN2     |   |   | + |   | + |   |  |   |   |  |   |
| FBP1     |   |   |   |   | + |   |  |   | + |  |   |
| FERMT2   |   |   |   |   | + |   |  |   |   |  | + |
| FGF18    | + |   |   |   |   |   |  |   | + |  |   |
| FGF2     | + |   |   | + |   |   |  |   | + |  |   |
| FGF9     | + |   | + |   |   |   |  |   | + |  |   |
| FGFR1    | + | + |   |   |   |   |  |   | + |  |   |
| FGFR2    | + | + | + |   |   |   |  |   | + |  |   |
| FGFR3    |   | + | + |   | + |   |  |   | + |  | + |
| FGFR4    |   |   | + |   |   |   |  |   | + |  |   |
| FGL2     |   |   |   |   | + |   |  |   |   |  |   |
| FHL1     |   |   | + |   | + |   |  |   | + |  |   |
| FIGF     | + |   |   |   |   |   |  | + | + |  |   |
| FLI1     |   |   |   |   | + |   |  | + |   |  |   |
| FLT1     | + |   | + |   |   |   |  |   | + |  | + |
| FLT4     | + |   | + |   | + |   |  |   | + |  |   |
| FMOD     |   |   | + |   | + |   |  |   | + |  | + |
| FN1      | + |   | + | + | + |   |  |   |   |  | + |
| FOXC2    | + |   |   |   | + |   |  | + | + |  | + |
| FOXO4    | + |   |   |   |   |   |  | + | + |  | + |
| FRAS1    |   |   | + |   |   |   |  |   |   |  | + |
| FREM1    |   |   | + |   |   |   |  |   |   |  | + |
| FREM2    |   |   | + |   |   |   |  |   |   |  | + |
| FST      |   |   |   |   |   |   |  |   | + |  |   |
| FSTL1    |   |   |   |   | + |   |  |   |   |  |   |
| FUT3     |   |   | + |   | + |   |  |   |   |  |   |
| FXYD6    |   |   | + |   | + |   |  |   |   |  |   |
| GALNT7   |   |   | + |   | + |   |  |   |   |  |   |
| GATA4    | + |   |   |   |   |   |  | + | + |  |   |
| GDF15    |   |   |   |   | + |   |  |   | + |  |   |
| GDF5     |   |   |   |   |   |   |  |   | + |  |   |
| GDF6     |   |   |   |   |   |   |  |   | + |  |   |
| GIMAP4   |   |   |   |   | + |   |  |   |   |  |   |
| GIMAP6   |   |   |   |   | + |   |  |   |   |  |   |
| GJA5     | + |   | + |   |   |   |  |   |   |  | + |
| GLYR1    |   |   |   |   | + |   |  |   |   |  |   |
| GPI      | + |   | + |   | + |   |  |   | + |  |   |
| GPR124   | + |   | + |   | + |   |  |   |   |  | + |
| GPR56    | + |   | + |   | + |   |  |   |   |  | + |
| GPX1     | + |   |   |   |   |   |  |   | + |  |   |
| GREM1    | + |   | + |   | + |   |  | + | + |  |   |
| GRHL2    |   |   |   |   | + |   |  | + |   |  |   |
| GSN      |   |   |   |   |   |   |  | + |   |  | + |
| GTF2I    | + |   |   |   |   |   |  | + |   |  |   |
| GZMK     |   |   |   |   | + |   |  |   |   |  |   |
| HAPLN1   |   |   | + |   |   |   |  |   |   |  | + |
| HAS1     |   |   | + |   |   |   |  |   |   |  | + |
| HDACS    | + |   |   |   |   |   |  | + |   |  |   |
| HDHD3    |   |   |   |   | + |   |  |   |   |  |   |
| HEG1     | + |   | + |   | + |   |  |   |   |  | + |
| HGF      | + |   | + |   | + |   |  |   | + |  | + |
| HIF1A    | + | + | + | + | + |   |  | + | + |  |   |
| HIPK1    | + |   |   |   |   |   |  |   | + |  |   |
| HIPK2    | + |   |   |   |   |   |  |   | + |  |   |
| HK2      |   | + |   |   |   |   |  |   | + |  |   |
| HK3      |   | + |   |   |   |   |  |   | + |  |   |
| HKDC1    |   | + |   |   |   |   |  |   | + |  |   |
| HLA-DPB1 |   |   | + |   |   |   |  | + |   |  |   |
| HMOX1    | + |   |   |   |   |   |  |   | + |  | + |
| HOXA5    | + |   |   |   |   |   |  | + | + |  |   |
| HOXA7    | + |   |   |   |   |   |  | + |   |  |   |
| HOXB13   | + |   |   |   |   |   |  | + |   |  |   |
| HOXB3    | + |   |   |   |   |   |  | + |   |  |   |
| HPSE     | + |   |   |   |   |   |  |   | + |  | + |
| HRAS     | + | + | + |   |   |   |  |   | + |  |   |
| HSD17B12 |   |   | + |   |   |   |  |   |   |  |   |
| HSP90B1  |   |   | + |   |   |   |  |   |   |  | + |
| HSPB1    | + |   | + |   |   |   |  |   |   |  | + |
| HSPG2    | + |   | + | + |   |   |  |   |   |  |   |
| HUNK     |   |   |   |   |   |   |  | + |   |  |   |
| IBSP     |   |   |   | + |   |   |  |   | + |  | + |
| ICAM1    |   |   | + |   |   |   |  | + |   |  | + |
| ID1      | + |   | + |   |   |   |  | + | + |  | + |
| ID2      |   |   |   |   |   |   |  | + | + |  |   |
| ID4      |   |   |   |   |   |   |  | + | + |  |   |
| IFNG     | + |   | + |   |   |   |  |   | + |  |   |
| IGF1     | + |   |   |   | + | + |  |   | + |  |   |
| IGFBP4   |   |   |   |   | + |   |  |   | + |  |   |
| IGFBP7   |   |   | + |   |   |   |  |   | + |  | + |
| IL10RA   |   |   | + |   | + |   |  |   |   |  |   |
| IL11     |   |   |   |   |   |   |  |   | + |  |   |
| IL13RA2  | + |   | + |   |   |   |  |   |   |  |   |
| IL15     |   |   | + |   |   |   |  |   | + |  |   |
| IL18     | + |   | + |   |   |   |  |   | + |  | + |

|          |   |   |  |   |  |   |   |   |   |  |   |
|----------|---|---|--|---|--|---|---|---|---|--|---|
| IL1A     | + |   |  |   |  | + |   |   | + |  |   |
| IL1B     | + |   |  |   |  | + |   |   | + |  | + |
| IL1RL1   |   |   |  | + |  |   |   |   |   |  |   |
| IL1RN    |   |   |  | + |  | + |   |   |   |  | + |
| IL6      | + |   |  | + |  | + |   |   | + |  | + |
| ILK      |   |   |  | + |  | + |   |   | + |  | + |
| INHBA    |   |   |  |   |  |   |   |   | + |  |   |
| INHBE    |   |   |  |   |  |   |   |   | + |  |   |
| IRF6     |   |   |  |   |  | + |   | + | + |  |   |
| ISL1     | + |   |  |   |  |   |   | + | + |  |   |
| ISLR     |   |   |  |   |  | + |   |   |   |  | + |
| ITGA1    |   |   |  | + |  | + |   |   |   |  | + |
| ITGA11   |   |   |  | + |  | + |   |   |   |  | + |
| ITGA2    |   |   |  | + |  | + |   |   |   |  | + |
| ITGA3    | + |   |  | + |  | + |   |   |   |  | + |
| ITGA5    | + |   |  | + |  | + |   |   | + |  | + |
| ITGA6    | + |   |  | + |  | + |   |   | + |  | + |
| ITGA7    |   |   |  | + |  | + |   |   |   |  | + |
| ITGA8    |   |   |  | + |  | + |   |   | + |  | + |
| ITGA9    |   |   |  | + |  | + |   |   |   |  | + |
| ITGAM    | + |   |  | + |  |   |   |   |   |  | + |
| ITGB1    | + |   |  | + |  | + |   |   | + |  | + |
| ITGB1BP1 | + |   |  |   |  |   |   |   |   |  |   |
| ITGB2    | + |   |  | + |  |   |   |   |   |  | + |
| ITGB3    | + |   |  | + |  | + |   |   | + |  | + |
| ITGB4    |   |   |  | + |  | + |   |   |   |  | + |
| ITGB6    |   |   |  | + |  | + |   |   |   |  | + |
| ITGB7    |   |   |  | + |  | + |   |   |   |  | + |
| ITGB8    | + |   |  | + |  | + |   |   |   |  | + |
| ITM2A    |   |   |  | + |  | + |   |   |   |  |   |
| JAG1     | + |   |  | + |  | + |   |   | + |  | + |
| JAM2     | + |   |  | + |  | + |   |   |   |  | + |
| JAM3     | + |   |  |   |  | + |   |   |   |  | + |
| JUN      | + | + |  |   |  |   |   | + | + |  | + |
| KCNJ8    |   |   |  | + |  | + |   |   |   |  |   |
| KDM1A    | + |   |  |   |  |   | + | + |   |  |   |
| KDR      | + |   |  | + |  |   |   |   | + |  |   |
| KIAA1462 |   |   |  |   |  | + |   |   |   |  |   |
| KISS1    |   |   |  |   |  |   | + |   | + |  |   |
| KLK3     | + |   |  |   |  |   |   |   |   |  | + |
| KRAS     | + | + |  | + |  |   |   |   | + |  |   |
| KRIT1    | + |   |  |   |  |   |   |   | + |  |   |
| KRT1     | + |   |  | + |  |   |   |   |   |  |   |
| KRT14    |   |   |  |   |  | + |   |   |   |  | + |
| KRT19    |   |   |  |   |  | + |   |   |   |  |   |
| KRT7     |   |   |  |   |  | + |   |   |   |  |   |
| LAD1     |   |   |  | + |  | + |   |   |   |  |   |
| LAMA1    |   |   |  | + |  | + |   |   |   |  | + |
| LAMA3    |   |   |  | + |  | + |   |   |   |  | + |
| LAMA4    | + |   |  | + |  | + |   |   |   |  | + |
| LAMA5    | + |   |  | + |  | + |   |   | + |  | + |
| LAMB3    |   |   |  | + |  | + |   |   |   |  | + |
| LAMC1    |   |   |  | + |  | + |   |   | + |  | + |
| LAMC2    |   |   |  |   |  | + |   |   |   |  | + |
| LDHA     |   |   |  |   |  |   |   | + |   |  |   |
| LEFTY1   |   |   |  |   |  |   |   |   | + |  |   |
| LGALS1   |   |   |  | + |  | + |   |   |   |  |   |
| LHFP     |   |   |  | + |  | + |   |   |   |  |   |
| LIFR     |   |   |  | + |  |   |   | + |   |  |   |
| LLGL2    |   |   |  |   |  | + |   |   | + |  |   |
| LOX      | + |   |  | + |  | + |   |   |   |  |   |
| LOXL2    | + |   |  | + |  | + |   |   |   |  | + |
| LRG1     | + |   |  |   |  |   |   |   |   |  |   |
| LTBP4    |   |   |  | + |  |   |   |   | + |  | + |
| LUM      |   |   |  | + |  |   |   |   | + |  |   |
| LY96     |   |   |  | + |  | + |   |   |   |  |   |
| MAF      |   |   |  |   |  | + |   |   | + |  |   |
| MAP2K1   | + | + |  | + |  | + |   |   | + |  | + |
| MAP2K2   | + | + |  |   |  | + |   |   | + |  | + |
| MAP2K4   |   |   |  |   |  |   | + |   |   |  |   |
| MAP3K7   | + |   |  | + |  |   |   |   |   |  |   |
| MAPK1    | + | + |  | + |  | + |   |   | + |  | + |
| MAPK3    | + | + |  |   |  | + |   |   | + |  | + |
| MAPKAPK3 | + |   |  |   |  |   |   |   |   |  |   |
| MCAM     | + |   |  | + |  |   |   |   |   |  | + |
| MED1     | + |   |  |   |  |   |   |   |   |  | + |
| MED23    |   |   |  |   |  |   | + | + |   |  |   |
| MEG3     | + |   |  |   |  |   |   |   | + |  | + |
| MEOX2    | + |   |  |   |  | + |   | + |   |  |   |
| MET      |   | + |  | + |  |   |   |   | + |  |   |
| MFAP4    |   |   |  | + |  | + |   |   |   |  | + |
| MGAT5    |   |   |  | + |  |   |   |   |   |  | + |
| MGP      |   |   |  | + |  |   |   |   |   |  |   |
| MISP     |   |   |  |   |  | + |   |   |   |  |   |
| MMP1     | + |   |  | + |  | + |   |   |   |  | + |
| MMP10    |   |   |  | + |  | + |   |   |   |  |   |
| MMP12    |   |   |  |   |  | + |   |   | + |  |   |
| MMP13    |   |   |  | + |  | + |   |   |   |  | + |
| MMP14    | + |   |  | + |  | + |   |   | + |  | + |
| MMP17    |   |   |  | + |  | + |   |   |   |  |   |
| MMP2     | + |   |  | + |  | + |   |   |   |  | + |
| MMP24    |   |   |  | + |  | + |   |   |   |  | + |
| MMP3     |   |   |  | + |  | + |   |   |   |  | + |
| MMP9     |   |   |  | + |  | + |   |   | + |  |   |
| MMRN2    | + |   |  | + |  |   |   |   |   |  |   |
| MPDZ     |   |   |  | + |  | + |   |   |   |  |   |
| MRC1     |   |   |  | + |  | + |   |   |   |  |   |
| MS4A4A   |   |   |  | + |  | + |   |   |   |  |   |
| MS4A6A   |   |   |  | + |  | + |   |   |   |  |   |
| MT3      | + |   |  |   |  |   |   |   | + |  |   |
| MTA1     |   |   |  |   |  | + |   | + |   |  |   |
| MTBP     |   |   |  |   |  |   |   | + |   |  |   |
| MTDH     | + |   |  | + |  |   |   | + |   |  |   |
| MTOR     |   | + |  |   |  | + |   |   | + |  |   |
| MUC1     |   |   |  | + |  | + |   |   | + |  |   |
| MYC      |   | + |  |   |  |   |   |   | + |  |   |
| MYCL     |   |   |  |   |  |   |   |   | + |  |   |
| MYH11    |   |   |  |   |  |   |   |   |   |  | + |
| MYLK     |   |   |  |   |  | + |   |   | + |  |   |

|          |   |   |   |   |   |   |   |   |  |   |   |  |
|----------|---|---|---|---|---|---|---|---|--|---|---|--|
| MYO1D    |   |   |   |   | + |   |   |   |  |   |   |  |
| MYO5C    |   |   |   |   | + |   |   |   |  |   |   |  |
| NAA15    | + |   |   |   |   |   |   | + |  |   |   |  |
| NAP1L3   |   |   |   |   | + |   |   |   |  |   |   |  |
| NCAM1    |   |   | + |   |   |   |   |   |  |   | + |  |
| NCL      | + |   |   |   |   |   |   |   |  |   |   |  |
| NDNF     |   |   | + |   |   |   |   |   |  | + |   |  |
| NDP      | + |   | + |   |   |   |   | + |  | + |   |  |
| NDRG1    |   |   | + |   |   |   | + | + |  |   |   |  |
| NF1      | + |   |   |   |   |   | + |   |  | + | + |  |
| NF2      |   |   | + |   |   |   |   |   |  | + | + |  |
| NFAT5    | + |   |   |   |   |   |   | + |  |   |   |  |
| NFATC2   | + |   | + |   |   |   |   | + |  | + |   |  |
| NFKB1    |   |   |   |   |   |   | + |   |  | + |   |  |
| NID2     |   |   | + |   |   |   |   |   |  |   | + |  |
| NME1     |   |   |   |   |   |   |   | + |  |   |   |  |
| NME4     |   |   |   |   |   |   |   | + |  |   |   |  |
| NODAL    | + |   |   |   | + |   |   |   |  | + | + |  |
| NOS2     | + |   |   |   |   |   | + |   |  | + |   |  |
| NOS3     | + |   | + |   |   |   | + |   |  | + |   |  |
| NOTCH1   | + |   | + |   | + |   |   |   |  |   | + |  |
| NOX5     | + | + | + |   |   |   |   |   |  | + |   |  |
| NPR1     | + |   | + |   |   |   |   |   |  | + |   |  |
| NR3C1    | + |   |   |   | + |   |   |   |  | + |   |  |
| NR4A1    | + |   |   |   |   |   |   | + |  | + |   |  |
| NR4A3    |   |   |   |   |   |   |   |   |  | + |   |  |
| NRCAM    | + |   | + |   |   |   |   |   |  |   | + |  |
| NRP1     | + |   | + |   |   |   |   |   |  | + | + |  |
| NRP2     | + |   | + |   |   |   |   |   |  | + | + |  |
| NRXN1    | + |   | + |   |   |   |   |   |  | + | + |  |
| NRXN3    | + |   | + |   |   |   |   |   |  | + | + |  |
| NTRK1    | + | + | + |   |   |   |   |   |  | + | + |  |
| OAS1     |   |   |   |   | + |   |   |   |  |   |   |  |
| OCLN     |   |   | + |   | + |   |   |   |  |   |   |  |
| OGN      |   |   | + |   |   |   |   |   |  | + |   |  |
| OLFM2B   |   |   | + |   | + |   |   |   |  |   |   |  |
| OVOL2    | + |   |   |   | + |   |   |   |  | + |   |  |
| P3H1     |   |   |   |   | + |   |   |   |  |   |   |  |
| P3H2     |   |   | + |   |   |   |   |   |  |   | + |  |
| PCOLCE   |   |   | + |   | + |   |   |   |  |   |   |  |
| PDCD10   | + |   | + |   |   |   |   |   |  | + | + |  |
| PDCL3    | + |   |   |   |   |   |   |   |  |   | + |  |
| PDGFA    | + | + | + | + |   | + |   |   |  | + | + |  |
| PDGFC    | + | + | + |   | + |   |   |   |  | + | + |  |
| PDGFRB   |   | + | + |   |   |   |   |   |  | + | + |  |
| PDK1     |   | + |   |   |   | + |   |   |  |   |   |  |
| PDPN     |   |   | + |   |   |   |   |   |  | + | + |  |
| PEBP4    |   |   |   |   |   |   |   | + |  |   |   |  |
| PECAM1   | + |   | + |   |   |   |   |   |  |   | + |  |
| PFKFB1   |   |   |   |   |   | + |   |   |  |   |   |  |
| PFKFB4   |   |   |   |   |   | + |   |   |  |   |   |  |
| PGK1     |   | + |   |   |   | + |   |   |  |   |   |  |
| PIK3CA   | + | + |   |   |   | + |   |   |  | + |   |  |
| PIK3CD   | + | + | + |   |   | + |   |   |  |   |   |  |
| PIK3CG   | + | + | + |   |   | + |   |   |  | + | + |  |
| PIK3R1   | + | + | + |   |   | + |   |   |  |   | + |  |
| PIK3R2   | + | + |   |   |   | + |   |   |  | + |   |  |
| PIK3R5   | + | + |   |   |   | + |   |   |  |   |   |  |
| PIK3R6   | + |   |   |   |   |   |   |   |  |   |   |  |
| PITX2    |   |   |   |   |   |   |   | + |  | + |   |  |
| PKM      |   | + | + |   |   |   |   |   |  |   | + |  |
| PKN1     |   |   | + |   | + |   |   |   |  | + | + |  |
| PKNOX1   | + |   |   |   |   |   |   | + |  |   |   |  |
| PLA2G10  | + |   |   |   |   |   |   | + |  |   |   |  |
| PLA2G2A  | + |   |   |   |   |   |   |   |  |   |   |  |
| PLA2G2D  | + |   |   |   |   |   |   |   |  |   |   |  |
| PLA2G3   | + |   | + |   |   |   |   |   |  |   |   |  |
| PLAU     | + |   | + | + |   | + |   |   |  | + | + |  |
| PLAUR    | + |   | + |   |   |   |   |   |  | + |   |  |
| PLCG1    | + | + | + |   |   | + |   |   |  | + |   |  |
| PLCG2    | + |   | + |   |   | + |   |   |  |   |   |  |
| PLEKHO1  |   |   | + |   |   | + |   |   |  |   |   |  |
| PLS1     |   |   |   |   |   | + |   |   |  |   |   |  |
| PLXDC1   | + |   | + |   |   |   |   |   |  |   |   |  |
| PLXNC1   |   |   | + |   |   | + |   |   |  |   | + |  |
| PLXND1   | + |   | + |   |   |   |   |   |  |   |   |  |
| PMP22    |   |   | + |   |   | + |   |   |  | + |   |  |
| PNPLA6   | + |   | + |   |   |   |   |   |  |   |   |  |
| POPDC3   |   |   | + |   |   | + |   |   |  |   |   |  |
| POSTN    |   |   | + |   |   |   |   |   |  |   | + |  |
| PPFIBP2  |   |   |   |   |   | + |   |   |  |   |   |  |
| PPL      |   |   | + |   |   | + |   |   |  |   |   |  |
| PPP1R16B | + |   | + |   |   |   |   |   |  |   |   |  |
| PPP2CB   |   |   |   |   |   |   |   |   |  | + |   |  |
| PPP2R1A  |   |   |   |   |   |   |   |   |  | + |   |  |
| PPP3R1   | + |   |   |   |   | + |   |   |  |   |   |  |
| PRELP    |   |   | + |   |   |   |   |   |  |   | + |  |
| PRF1     |   |   | + |   |   | + |   | + |  |   |   |  |
| PRKCB    | + | + | + |   |   |   | + |   |  | + | + |  |
| PRKCG    | + | + | + |   |   |   | + |   |  | + | + |  |
| PRKCZ    |   |   | + |   |   | + |   |   |  |   |   |  |
| PROK2    | + |   |   |   |   |   |   |   |  | + | + |  |
| PROM1    |   |   | + |   |   | + |   | + |  |   |   |  |
| PRR15L   |   |   |   |   |   | + |   |   |  |   |   |  |
| PRSS22   |   |   |   |   | + |   |   |   |  |   |   |  |
| PRSS8    |   |   | + | + | + |   |   |   |  |   |   |  |
| PTEN     | + | + | + |   |   |   |   |   |  | + |   |  |
| PTGDS    |   |   |   |   |   | + |   |   |  |   |   |  |
| PTGIS    | + |   | + |   |   | + |   |   |  |   |   |  |
| PTGS2    | + |   |   |   |   |   |   |   |  | + | + |  |
| PTK2     | + |   |   | + | + |   |   |   |  |   | + |  |
| PTK2B    | + |   |   |   |   |   | + |   |  | + | + |  |
| PTK6     |   |   | + |   |   | + |   |   |  |   |   |  |
| PTPRB    | + |   | + |   |   |   |   |   |  |   | + |  |
| PTPRC    |   |   | + |   |   | + |   |   |  | + | + |  |
| PTPRM    | + |   | + |   |   |   |   |   |  | + | + |  |
| PTRF     |   |   | + |   |   | + |   |   |  |   |   |  |
| PTTG1    |   |   |   |   |   |   |   | + |  | + |   |  |
| PTX3     |   |   |   |   | + |   |   |   |  |   |   |  |

|          |   |   |   |  |  |  |  |   |   |   |
|----------|---|---|---|--|--|--|--|---|---|---|
| PXDN     |   |   | + |  |  |  |  |   |   |   |
| PYCARD   |   |   |   |  |  |  |  |   |   |   |
| QKI      | + |   | + |  |  |  |  | + |   |   |
| RAB25    |   |   | + |  |  |  |  |   | + |   |
| RAC1     | + | + | + |  |  |  |  |   |   | + |
| RAC2     | + | + | + |  |  |  |  |   | + | + |
| RAF1     | + | + | + |  |  |  |  |   | + |   |
| RAMP1    | + |   | + |  |  |  |  |   |   |   |
| RAMP2    | + |   | + |  |  |  |  |   |   |   |
| RB1      |   |   |   |  |  |  |  |   |   |   |
| RBL1     |   |   |   |  |  |  |  |   |   |   |
| RBL2     |   |   |   |  |  |  |  |   |   |   |
| RBM47    |   |   |   |  |  |  |  |   |   |   |
| RBPJ     | + |   |   |  |  |  |  |   |   |   |
| RBX1     |   |   |   |  |  |  |  |   |   |   |
| RELN     |   |   |   |  |  |  |  |   |   |   |
| RGCC     | + |   |   |  |  |  |  |   |   |   |
| RHOA     |   |   |   |  |  |  |  |   |   |   |
| RNH1     | + |   |   |  |  |  |  |   |   |   |
| ROBO4    | + |   |   |  |  |  |  |   |   |   |
| ROCK1    | + |   |   |  |  |  |  |   |   |   |
| ROCK2    | + |   |   |  |  |  |  |   |   |   |
| RORA     | + |   |   |  |  |  |  |   |   |   |
| RORB     |   |   |   |  |  |  |  |   |   |   |
| RPS27A   |   |   |   |  |  |  |  |   |   |   |
| RPS6KB1  |   |   |   |  |  |  |  |   |   |   |
| RPS6KB2  |   |   |   |  |  |  |  |   |   |   |
| RRAS     | + |   |   |  |  |  |  |   |   |   |
| RTN4     | + |   |   |  |  |  |  |   |   |   |
| RUNX1    | + |   |   |  |  |  |  |   |   |   |
| RUNX1T1  |   |   |   |  |  |  |  |   |   |   |
| S100A14  |   |   |   |  |  |  |  |   |   |   |
| S100A7   | + |   |   |  |  |  |  |   |   |   |
| S1PR1    | + |   |   |  |  |  |  |   |   |   |
| SACS     |   |   |   |  |  |  |  |   |   |   |
| SAMSN1   |   |   |   |  |  |  |  |   |   |   |
| SCG2     | + |   |   |  |  |  |  |   |   |   |
| SCNN1A   |   |   |   |  |  |  |  |   |   |   |
| SDC4     |   |   |   |  |  |  |  |   |   |   |
| SELE     |   |   |   |  |  |  |  |   |   |   |
| SEMA3E   | + |   |   |  |  |  |  |   |   |   |
| SERINC5  |   |   |   |  |  |  |  |   |   |   |
| SERPINA1 | + |   |   |  |  |  |  |   |   |   |
| SERPINE1 | + |   |   |  |  |  |  |   |   |   |
| SERPINF1 | + |   |   |  |  |  |  |   |   |   |
| SERPING1 | + |   |   |  |  |  |  |   |   |   |
| SERPINH1 |   |   |   |  |  |  |  |   |   |   |
| SET      |   |   |   |  |  |  |  |   |   |   |
| SETD2    | + |   |   |  |  |  |  |   |   |   |
| SFRP1    | + |   |   |  |  |  |  |   |   |   |
| SFRP2    | + |   |   |  |  |  |  |   |   |   |
| SH2B3    | + |   |   |  |  |  |  |   |   |   |
| SH2D3A   |   |   |   |  |  |  |  |   |   |   |
| SH3YL1   |   |   |   |  |  |  |  |   |   |   |
| SHB      | + |   |   |  |  |  |  |   |   |   |
| SIRT1    | + |   |   |  |  |  |  |   |   |   |
| SKP1     |   |   |   |  |  |  |  |   |   |   |
| SLC12A6  | + |   |   |  |  |  |  |   |   |   |
| SLC2A1   |   |   |   |  |  |  |  |   |   |   |
| SLC35A3  |   |   |   |  |  |  |  |   |   |   |
| SLC37A1  |   |   |   |  |  |  |  |   |   |   |
| SLC44A4  |   |   |   |  |  |  |  |   |   |   |
| SLIT2    | + |   |   |  |  |  |  |   |   |   |
| SLPI     |   |   |   |  |  |  |  |   |   |   |
| SMAD1    |   |   |   |  |  |  |  |   |   |   |
| SMAD2    |   |   |   |  |  |  |  |   |   |   |
| SMAD3    |   |   |   |  |  |  |  |   |   |   |
| SMAD4    |   |   |   |  |  |  |  |   |   |   |
| SMAD5    |   |   |   |  |  |  |  |   |   |   |
| SMAD9    |   |   |   |  |  |  |  |   |   |   |
| SMC3     |   |   |   |  |  |  |  |   |   |   |
| SMOC1    |   |   |   |  |  |  |  |   |   |   |
| SMURF1   |   |   |   |  |  |  |  |   |   |   |
| SMURF2   |   |   |   |  |  |  |  |   |   |   |
| SNAI1    | + |   |   |  |  |  |  |   |   |   |
| SNAI2    |   |   |   |  |  |  |  |   |   |   |
| SNAI3    |   |   |   |  |  |  |  |   |   |   |
| SNRPF    |   |   |   |  |  |  |  |   |   |   |
| SOD1     | + |   |   |  |  |  |  |   |   |   |
| SORD     |   |   |   |  |  |  |  |   |   |   |
| SOX17    | + |   |   |  |  |  |  |   |   |   |
| SOX2     |   |   |   |  |  |  |  |   |   |   |
| SOX9     |   |   |   |  |  |  |  |   |   |   |
| SP1      |   |   |   |  |  |  |  |   |   |   |
| SPARC    | + |   |   |  |  |  |  |   |   |   |
| SPARCL1  |   |   |   |  |  |  |  |   |   |   |
| SPDEF    |   |   |   |  |  |  |  |   |   |   |
| SPHK2    | + |   |   |  |  |  |  |   |   |   |
| SPINK5   | + |   |   |  |  |  |  |   |   |   |
| SPINT1   | + |   |   |  |  |  |  |   |   |   |
| SPOCK3   |   |   |   |  |  |  |  |   |   |   |
| SPP1     |   |   |   |  |  |  |  |   |   |   |
| SRC      | + |   |   |  |  |  |  |   |   |   |
| SRF      | + |   |   |  |  |  |  |   |   |   |
| SRGN     | + |   |   |  |  |  |  |   |   |   |
| SRPK2    | + |   |   |  |  |  |  |   |   |   |
| SRPX2    | + |   |   |  |  |  |  |   |   |   |
| SSTR2    |   |   |   |  |  |  |  |   |   |   |
| ST14     |   |   |   |  |  |  |  |   |   |   |
| STAB1    | + |   |   |  |  |  |  |   |   |   |
| STAB2    | + |   |   |  |  |  |  |   |   |   |
| STAT1    | + |   |   |  |  |  |  |   |   |   |
| STAT3    |   |   |   |  |  |  |  |   |   |   |
| SULF1    | + |   |   |  |  |  |  |   |   |   |
| SV2B     |   |   |   |  |  |  |  |   |   |   |
| SYK      | + |   |   |  |  |  |  |   |   |   |
| SYNE1    |   |   |   |  |  |  |  |   |   |   |
| TACSTD2  |   |   |   |  |  |  |  |   |   |   |
| TAL1     | + |   |   |  |  |  |  |   |   |   |
