# Supplementary material for: Spatial profiling of gastric cancer patient-matched primary and locoregional metastases reveals principles of tumour dissemination
Source: PubMed Central journal article supplement — Gut. 2020 Nov 23;70(10):1823–32. doi: 10.1136/gutjnl-2020-320805 (PMC8458060; doi:10.1136/gutjnl-2020-320805), 2020-11-23
Supplement: gutjnl-2020-320805supp003.pdf [file gutjnl-2020-320805supp003.pdf]

## Primers Sequence (5'-3') for pRT-PCR validation

*TGFB* F: TGCCTGAACAACGGATTGA

*TGFB* R: TCGCCTTCTGCTCTTGTTT

*FGF18* F: GGACGATGTGAGCCGTAAG

*FGF18* R: GGTGTCTGTCTCCACTAGGA

*CEACAM6* F: TCCCTGCAGATTGCATGTC

*CEACAM6* R: GTGGGTGGGTTCCAGAAG

*CDH1* F: CCACCAAAGTCACGCTGAATA

*CDH1* R: CAGGAGAGGAGTTGGGAAATG

*CLDN4* F: CAACTGCCTGGAGGATGAAA

*CLDN4* R: CACCGGCACTATCACCATAAG
