# Supplementary material for: Spatial profiling of gastric cancer patient-matched primary and locoregional metastases reveals principles of tumour dissemination
Source: PubMed Central journal article supplement — Gut. 2020 Nov 23;70(10):1823–32. doi: 10.1136/gutjnl-2020-320805 (PMC8458060; doi:10.1136/gutjnl-2020-320805), 2020-11-23
Supplement: gutjnl-2020-320805supp004.pdf [file gutjnl-2020-320805supp004.pdf]

|        |        |        |          |        |         |
|--------|--------|--------|----------|--------|---------|
| B2M    | ARID1B | FGFR4  | NOTCH4   | ABL1   | KIT     |
| CALR   | ARID2  | FLT1   | NTRK1    | ACVR2A | KRAS    |
| CANX   | ATR    | FLT4   | NTRK3    | AKT1   | MAP2K1  |
| HSPA5  | ATRX   | FOXL2  | PALB2    | ALK    | MAP2K4  |
| PDIA3  | AURKA  | FOXP1  | PAX5     | APC    | MAP3K1  |
| POLD1  | AURKB  | GATA1  | PBRM1    | ATM    | MET     |
| POLD2  | AXIN1  | GATA2  | PDCD1LG2 | BCL9L  | MLH1    |
| POLE   | AXL    | GATA3  | PDGFRB   | BRAF   | MPL     |
| TAP1   | BAP1   | GATA4  | PHF6     | CDH1   | MTOR    |
| TAPBP  | BARD1  | GATA6  | PIK3CB   | CDKN2A | MUC17   |
| ASXL1  | BCL6   | HGF    | PIK3CG   | CHD4   | NF1     |
| BCOR   | BRCA1  | IGF1R  | PIK3R2   | CSF1R  | NOTCH1  |
| CBL    | BRCA2  | IGF2   | PMS2     | CTCF   | NPM1    |
| CEBPA  | BRD4   | JAK1   | PPP2R1A  | CTNNB1 | NRAS    |
| CREBBP | BTK    | KDM5C  | PTCH1    | DCC    | PDGFRA  |
| DNMT3A | CCND1  | KDM6A  | RAC1     | DDR2   | PIK3CA  |
| ETV6   | CCNE1  | KMT2C  | RAD51    | DMD    | PIK3R1  |
| MYD88  | CD274  | KMT2D  | RAF1     | EGFR   | PTEN    |
| PPM1D  | CDK4   | MAGI3  | RARA     | EP300  | PTPN11  |
| RAD21  | CDK6   | MAP2K2 | RHEB     | ERBB2  | RB1     |
| RUNX1  | CDKN1A | MAPK1  | RHOA     | ERBB3  | RBM10   |
| SETD2  | CDKN1B | MAPK3  | ROS1     | ERBB4  | RET     |
| SF3B1  | CHEK1  | MCL1   | RPTOR    | EZH2   | RNF43   |
| SH2B3  | CHEK2  | MDM2   | RSPO2    | FBXW7  | SMAD2   |
| SRSF2  | CRKL   | MDM4   | RSPO3    | FGFR1  | SMAD4   |
| STAG2  | DOT1L  | MED12  | SETBP1   | FGFR2  | SMARCB1 |
| STAT3  | DPYD   | MEN1   | SMAD3    | FGFR3  | SMO     |
| TET2   | EPHA3  | MITF   | SMARCA4  | FLT3   | SOX9    |
| U2AF1  | EPHA5  | MLH3   | SOX2     | GNA11  | SRC     |
| WT1    | EPHA7  | MRE11A | SPOP     | GNAQ   | STK11   |
| ZRSR2  | EPHB1  | MSH2   | TERT     | GNAS   | TP53    |
| ACVR1B | EPHB2  | MSH6   | TGFBR2   | HNF1A  | VHL     |
| AKT2   | EPHB6  | MUTYH  | TOP1     | HRAS   | ZFP36L2 |
| AKT3   | ERCC2  | MYC    | TOP2A    | IDH1   | ZNRF3   |
| AMER1  | ERRFI1 | MYCN   | TSC1     | IDH2   | TYMS    |
| AR     | ESR1   | NCOR1  | TSC2     | JAK2   |         |
| ARAF   | ESR2   | NF2    | VEGFA    | JAK3   |         |
| ARID1A | FANCA  | NFE2L2 | XPO1     | KDR    |         |
