# Supplementary material for: Spatial profiling of gastric cancer patient-matched primary and locoregional metastases reveals principles of tumour dissemination
Source: PubMed Central journal article supplement — Gut. 2020 Nov 23;70(10):1823–32. doi: 10.1136/gutjnl-2020-320805 (PMC8458060; doi:10.1136/gutjnl-2020-320805), 2020-11-23
Supplement: gutjnl-2020-320805supp005.pdf [file gutjnl-2020-320805supp005.pdf]

| Patient Code | Nanostring        |                    |                    |                    | MLPA subregions   |                   |                    | NGS               |                   |                    | qRT-PCR           |                   |                    | Histopath | Clinical |
|--------------|-------------------|--------------------|--------------------|--------------------|-------------------|-------------------|--------------------|-------------------|-------------------|--------------------|-------------------|-------------------|--------------------|-----------|----------|
|              | LN <sub>met</sub> | PT <sub>sup1</sub> | PT <sub>sup2</sub> | PT <sub>deep</sub> | LN <sub>met</sub> | PT <sub>sup</sub> | PT <sub>deep</sub> | LN <sub>met</sub> | PT <sub>sup</sub> | PT <sub>deep</sub> | LN <sub>met</sub> | PT <sub>sup</sub> | PT <sub>deep</sub> |           |          |
| TH313        | X                 | X                  | X                  | X                  |                   |                   |                    | X                 | X                 | X                  | X                 | X                 | X                  | X         | X        |
| TH308        | X                 | X                  | X                  | X                  |                   |                   |                    |                   |                   |                    | X                 | X                 | X                  | X         | X        |
| TH301        | X                 | X                  | X                  | X                  | X                 | X                 | X                  |                   |                   |                    |                   |                   |                    | X         | X        |
| TH311        |                   | X                  | X                  | X                  | X                 | X                 | X                  |                   |                   |                    |                   |                   |                    | X         | X        |
| TH293        | X                 | X                  |                    | X                  | X                 | X                 | X                  |                   |                   |                    |                   |                   |                    | X         | X        |
| TH286        | X                 | X                  |                    | X                  |                   |                   |                    |                   |                   |                    | X                 | X                 | X                  | X         | X        |
| TH195        |                   | X                  | X                  | X                  | X                 | X                 | X                  |                   |                   |                    |                   |                   |                    | X         | X        |
| TH263        | X                 | X                  | X                  | X                  | X                 | X                 | X                  |                   |                   |                    | X                 | X                 | X                  | X         | X        |
| TH82         | X                 | X                  | X                  | X                  | X                 | X                 | X                  |                   |                   |                    |                   |                   |                    | X         | X        |
| TH211        | X                 | X                  | X                  | X                  | X                 | X                 | X                  |                   |                   |                    | X                 | X                 | X                  | X         | X        |
| TH271        | X                 | X                  | X                  | X                  | X                 | X                 | X                  |                   |                   |                    |                   |                   |                    | X         | X        |
| TH112        | X                 | X                  | X                  | X                  |                   |                   |                    |                   |                   |                    | X                 | X                 | X                  | X         | X        |
| TH245        | X                 | X                  | X                  | X                  | X                 | X                 | X                  |                   |                   |                    |                   |                   |                    | X         | X        |
| TH257        | X                 | X                  | X                  | X                  | X                 | X                 | X                  |                   |                   |                    |                   |                   |                    | X         | X        |
| TH126        | X                 | X                  | X                  | X                  | X                 | X                 | X                  |                   |                   |                    |                   |                   |                    | X         | X        |
| TH375        | X                 | X                  | X                  | X                  |                   |                   |                    |                   |                   |                    |                   |                   |                    | X         | X        |
| TH316        | X                 | X                  | X                  | X                  | X                 | X                 | X                  | X                 | X                 | X                  |                   |                   |                    | X         | X        |
| TH357        | X                 | X                  | X                  | X                  | X                 | X                 | X                  |                   |                   |                    |                   |                   |                    | X         | X        |
| TH351        | X                 | X                  | X                  | X                  | X                 | X                 | X                  |                   |                   |                    |                   |                   |                    | X         | X        |
| TH377        |                   | X                  | X                  | X                  |                   |                   |                    |                   |                   |                    |                   |                   |                    | X         | X        |
| TH325        |                   | X                  | X                  | X                  | X                 | X                 | X                  |                   |                   |                    |                   |                   |                    | X         | X        |
| TH366        |                   | X                  | X                  | X                  |                   |                   |                    |                   |                   |                    |                   |                   |                    | X         | X        |
| TH339        | X                 | X                  | X                  |                    | X                 | X                 | X                  |                   |                   |                    |                   |                   |                    | X         | X        |
| TH347        | X                 | X                  | X                  | X                  | X                 | X                 | X                  | X                 | X                 | X                  |                   |                   |                    | X         | X        |
| TH1000       | X                 | X                  | X                  | X                  | X                 | X                 | X                  | X                 | X                 | X                  |                   |                   |                    | X         | X        |
| TH689        | X                 | X                  | X                  | X                  |                   |                   |                    |                   |                   |                    |                   |                   |                    | X         | X        |
| TH358        |                   | X                  | X                  | X                  | X                 | X                 | X                  |                   |                   |                    |                   |                   |                    | X         | X        |
| TH691        | X                 | X                  | X                  |                    | X                 | X                 | X                  | X                 | X                 | X                  |                   |                   |                    | X         | X        |
| TH705        |                   | X                  | X                  | X                  |                   |                   |                    |                   |                   |                    |                   |                   |                    | X         | X        |
| TH765        | X                 | X                  |                    | X                  |                   |                   |                    |                   |                   |                    |                   |                   |                    | X         | X        |
| TH657        | X                 | X                  | X                  | X                  | X                 | X                 | X                  |                   |                   |                    |                   |                   |                    | X         | X        |
| TH630        | X                 | X                  | X                  | X                  |                   |                   |                    | X                 | X                 | X                  |                   |                   |                    | X         | X        |
| TH201        | X                 | X                  | X                  | X                  |                   |                   |                    |                   |                   |                    |                   |                   |                    | X         | X        |
| TH391        |                   | X                  | X                  | X                  | X                 | X                 | X                  |                   |                   |                    |                   |                   |                    | X         | X        |
| TH752        | X                 | X                  |                    | X                  | X                 | X                 | X                  | X                 | X                 | X                  |                   |                   |                    | X         | X        |
| TH370        |                   | X                  | X                  | X                  | X                 | X                 | X                  |                   |                   |                    |                   |                   |                    | X         | X        |
| TH439        |                   | X                  | X                  |                    | X                 | X                 | X                  |                   |                   |                    |                   |                   |                    | X         | X        |
| TH589        | X                 |                    |                    |                    | X                 | X                 | X                  |                   |                   |                    |                   |                   |                    | X         | X        |
| TH660        | X                 | X                  | X                  | X                  | X                 | X                 | X                  |                   |                   |                    |                   |                   |                    | X         | X        |
| TH449        | X                 | X                  | X                  | X                  |                   |                   |                    |                   |                   |                    |                   |                   |                    | X         | X        |
| TH684        | X                 | X                  | X                  | X                  | X                 | X                 | X                  |                   |                   |                    |                   |                   |                    | X         | X        |
| TH418        | X                 | X                  | X                  | X                  | X                 | X                 | X                  |                   |                   |                    |                   |                   |                    | X         | X        |
| TH420        | X                 | X                  | X                  | X                  | X                 | X                 | X                  |                   |                   |                    | X                 | X                 | X                  | X         | X        |
| TH737        | X                 | X                  | X                  | X                  | X                 | X                 | X                  |                   |                   |                    |                   |                   |                    | X         | X        |
| TH276        | X                 | X                  | X                  | X                  |                   |                   |                    |                   |                   |                    |                   |                   |                    | X         | X        |
| TH309        | X                 | X                  | X                  | X                  | X                 | X                 | X                  |                   |                   |                    |                   |                   |                    | X         | X        |
| TH128        | X                 | X                  | X                  | X                  |                   |                   |                    |                   |                   |                    |                   |                   |                    | X         | X        |
| TH387        | X                 | X                  |                    | X                  | X                 | X                 | X                  |                   |                   |                    |                   |                   |                    | X         | X        |
| TH266        | X                 | X                  |                    | X                  | X                 | X                 | X                  |                   |                   |                    |                   |                   |                    | X         | X        |
| TH314        | X                 | X                  | X                  |                    |                   |                   |                    |                   |                   |                    |                   |                   |                    | X         | X        |
| TH803        |                   | X                  | X                  | X                  |                   |                   |                    |                   |                   |                    |                   |                   |                    | X         | X        |
| TH730        | X                 | X                  | X                  | X                  | X                 | X                 | X                  | X                 | X                 | X                  |                   |                   |                    | X         | X        |
| TH659        | X                 | X                  | X                  | X                  | X                 | X                 | X                  |                   |                   |                    |                   |                   |                    | X         | X        |
| TH329        | X                 | X                  | X                  | X                  | X                 | X                 | X                  |                   |                   |                    |                   |                   |                    | X         | X        |
| TH196        | X                 | X                  |                    |                    |                   |                   |                    |                   |                   |                    |                   |                   |                    | X         | X        |
| TH679        |                   | X                  | X                  | X                  | X                 | X                 | X                  |                   |                   |                    |                   |                   |                    | X         | X        |
| TH194        | X                 | X                  |                    | X                  |                   |                   |                    |                   |                   |                    | X                 | X                 | X                  | X         | X        |
| TH300        | X                 | X                  | X                  | X                  |                   |                   |                    |                   |                   |                    |                   |                   |                    | X         | X        |
| TH306        | X                 | X                  | X                  | X                  | X                 | X                 | X                  |                   |                   |                    |                   |                   |                    | X         | X        |
| TH282        | X                 | X                  | X                  | X                  |                   |                   |                    |                   |                   |                    |                   |                   |                    | X         | X        |
| TH295        | X                 | X                  | X                  | X                  | X                 | X                 | X                  |                   |                   |                    |                   |                   |                    | X         | X        |
| TH189        |                   | X                  |                    |                    | X                 | X                 | X                  |                   |                   |                    |                   |                   |                    | X         | X        |
| TH183        | X                 | X                  | X                  | X                  |                   |                   |                    |                   |                   |                    |                   |                   |                    | X         | X        |
| TH712        | X                 | X                  | X                  | X                  |                   |                   |                    |                   |                   |                    |                   |                   |                    | X         | X        |
