# Supplementary material for: Spatial profiling of gastric cancer patient-matched primary and locoregional metastases reveals principles of tumour dissemination
Source: PubMed Central journal article supplement — Gut. 2020 Nov 23;70(10):1823–32. doi: 10.1136/gutjnl-2020-320805 (PMC8458060; doi:10.1136/gutjnl-2020-320805), 2020-11-23
Supplement: gutjnl-2020-320805supp006.pdf [file gutjnl-2020-320805supp006.pdf]

| Patient Code | Year | Age | Sex    | T stage | N stage | Tumor Location   | Tumor Grade | Lauren     | Surgery                         | EBV      | MMR        |
|--------------|------|-----|--------|---------|---------|------------------|-------------|------------|---------------------------------|----------|------------|
| TH313        | 1991 | 66  | Male   | T3      | N2      | Proximal         | G1          | Intestinal | total gastrectomy               | negative | proficient |
| TH308        | 1991 | 65  | Male   | T4a     | N1      | Proximal         | G2          | Intestinal | oesophago-gastrectomy           | negative | proficient |
| TH301        | 1990 | 70  | Female | T2      | N2      | Proximal         | G3          | Intestinal | total gastrectomy               | negative | proficient |
| TH311        | 1991 | 74  | Male   | T3      | N2      | Mid              | G3          | Intestinal | partial or subtotal gastrectomy | negative | proficient |
| TH293        | 1990 | 77  | Male   | T3      | N2      | Proximal         | G2          | Intestinal | total gastrectomy               | negative | proficient |
| TH286        | 1989 | 63  | Male   | T3      | N2      | Proximal         | G3          | Intestinal | total gastrectomy               | positive | proficient |
| TH195        | 1986 | 78  | Male   | T3      | N1      | Distal           | G2          | Intestinal | partial or subtotal gastrectomy | negative | deficient  |
| TH263        | 1988 | 77  | Female | T4a     | N2      | Distal           | G3          | Intestinal | total gastrectomy               | negative | proficient |
| TH82         | 1985 | 65  | Female | T4a     | N2      | Proximal         | G3          | Intestinal | total gastrectomy               | negative | proficient |
| TH211        | 1994 | 81  | Male   | T3      | N3a     | Distal           | G3          | Intestinal | total gastrectomy               | negative | proficient |
| TH271        | 1989 | 65  | Female | T2      | N2      | Distal           | G3          | Intestinal | partial or subtotal gastrectomy | negative | proficient |
| TH112        | 1987 | 64  | Male   | T4a     | N2      | 0                | G1          | Intestinal | total gastrectomy               | negative | proficient |
| TH245        | 1987 | 73  | Female | T3      | N3a     | Distal           | G3          | Intestinal | partial or subtotal gastrectomy | negative | proficient |
| TH257        | 1988 | 62  | Male   | T4a     | N2      | Distal           | G3          | Intestinal | partial or subtotal gastrectomy | negative | proficient |
| TH126        | 1988 | 79  | Male   | T2      | N2      | Proximal         | G2          | Intestinal | total gastrectomy               | negative | proficient |
| TH375        | 1993 | 71  | Male   | T4a     | N3b     | Proximal         | G2          | Intestinal | oesophago-gastrectomy           | negative | proficient |
| TH316        | 1991 | 86  | Male   | T3      | N1      | Mid              | G3          | Intestinal | total gastrectomy               | negative | deficient  |
| TH357        | 1992 | 83  | Male   | T4a     | N2      | Distal           | G3          | Intestinal | total gastrectomy               | positive | proficient |
| TH351        | 1992 | 59  | Male   | T2      | N1      | Proximal         | G2          | Intestinal | total gastrectomy               | positive | proficient |
| TH377        | 1993 | 81  | Male   | T4a     | N2      | Proximal         | G2          | Intestinal | total gastrectomy               | negative | proficient |
| TH325        | 1991 | 70  | Male   | T4a     | N3a     | Proximal         | G2          | Intestinal | total gastrectomy               | negative | proficient |
| TH366        | 1992 | 66  | Female | T4a     | N2      | Proximal         | G3          | Intestinal | total gastrectomy               | negative | proficient |
| TH339        | 1992 | 84  | Male   | T4a     | N2      | Proximal         | G3          | Intestinal | partial or subtotal gastrectomy | negative | proficient |
| TH347        | 1992 | 83  | Female | T4a     | N3a     | Distal           | G2          | Intestinal | partial or subtotal gastrectomy | negative | deficient  |
| TH689        | 2001 | 73  | Male   | T2      | N2      | Distal           | G2          | Intestinal | partial or subtotal gastrectomy | negative | proficient |
| TH358        | 1992 | 72  | Male   | T3      | N3a     | Distal           | G2          | Intestinal | partial or subtotal gastrectomy | negative | proficient |
| TH691        | 2001 | 65  | Female | T4a     | N3b     | Distal           | G3          | Intestinal | partial or subtotal gastrectomy | negative | proficient |
| TH705        | 2001 | 79  | Female | T4a     | N2      | Mid              | G2          | Intestinal | partial or subtotal gastrectomy | negative | proficient |
| TH765        | 1993 | 76  | Male   | T3      | N3a     | Proximal         | G2          | Intestinal | total gastrectomy               | negative | proficient |
| TH657        | 2000 | 67  | Male   | T4a     | N2      | Distal           | G3          | Intestinal | partial or subtotal gastrectomy | negative | proficient |
| TH630        | 1999 | 75  | Male   | T4a     | N3a     | Proximal         | G2          | Intestinal | total gastrectomy               | negative | proficient |
| TH201        | 1986 | 79  | Male   | T3      | N3a     | Distal           | G2          | Intestinal | partial or subtotal gastrectomy | negative | NA         |
| TH391        | 1993 | 58  | Male   | T3      | N2      | Distal           | G2          | Intestinal | total gastrectomy               | negative | proficient |
| TH752        | 2003 | 73  | Male   | T2      | N1      | Mid              | G3          | Intestinal | partial or subtotal gastrectomy | negative | proficient |
| TH370        | 1993 | 65  | Male   | T4a     | N3a     | Mid              | G3          | Intestinal | total gastrectomy               | negative | proficient |
| TH439        | 1994 | 64  | Female | T4a     | N2      | Distal           | G2          | Intestinal | partial or subtotal gastrectomy | negative | proficient |
| TH589        | 1998 | 70  | Female | T4a     | N3b     | Proximal         | G3          | Intestinal | total gastrectomy               | positive | proficient |
| TH660        | 2000 | 85  | Male   | T4a     | N3a     | Proximal         | G3          | Intestinal | total gastrectomy               | negative | proficient |
| TH449        | 1994 | 76  | Male   | T4a     | N2      | Proximal         | G2          | Intestinal | total gastrectomy               | negative | proficient |
| TH684        | 2001 | 63  | Male   | T4a     | N2      | Distal           | G2          | Intestinal | partial or subtotal gastrectomy | negative | proficient |
| TH418        | 1994 | 78  | Male   | T4a     | N2      | Mid              | G2          | Intestinal | total gastrectomy               | positive | proficient |
| TH420        | 1994 | 69  | Male   | T3      | N3b     | Proximal         | G2          | Intestinal | oesophago-gastrectomy           | negative | proficient |
| TH737        | 2003 | 66  | Female | T4a     | N3a     | Mid              | G3          | Intestinal | total gastrectomy               | negative | proficient |
| TH276        | 1989 | 52  | Male   | T3      | N3a     | Distal           | G3          | Intestinal | total gastrectomy               | negative | proficient |
| TH309        | 1991 | 63  | Female | T3      | N2      | Mid              | G3          | Intestinal | total gastrectomy               | negative | proficient |
| TH128        | 1988 | 82  | Female | T4a     | N3a     | Proximal         | G2          | Intestinal | total gastrectomy               | negative | proficient |
| TH387        | 1993 | 77  | Male   | T4a     | N3b     | Mid              | G2          | Intestinal | total gastrectomy               | negative | proficient |
| TH266        | 1988 | 66  | Male   | T3      | N1      | Distal           | G3          | Intestinal | partial or subtotal gastrectomy | NA       | proficient |
| TH314        | 1991 | 79  | Male   | T4a     | N3a     | Proximal         | G2          | Intestinal | total gastrectomy               | negative | proficient |
| TH803        | 1993 | 69  | Male   | T4b     | N2      | Mid              | G3          | Intestinal | total gastrectomy               | negative | proficient |
| TH730        | 2002 | 78  | Male   | T3      | N2      | Distal           | G2          | Intestinal | partial or subtotal gastrectomy | negative | proficient |
| TH659        | 2000 | 74  | Female | T3      | N1      | Distal           | G3          | Intestinal | partial or subtotal gastrectomy | negative | proficient |
| TH329        | 1991 | 78  | Female | T4a     | N1      | Mid              | G2          | Intestinal | total gastrectomy               | negative | proficient |
| TH196        | 1986 | 68  | Male   | T3      | N2      | Proximal         | G2          | Intestinal | total gastrectomy               | negative | proficient |
| TH679        | 2000 | 54  | Male   | T2      | N1      | Mid              | G3          | Intestinal | partial or subtotal gastrectomy | positive | proficient |
| TH194        | 1985 | 74  | Male   | T3      | N2      | Distal           | G2          | Intestinal | total gastrectomy               | negative | proficient |
| TH300        | 1990 | 91  | Male   | T4a     | N3a     | Distal           | G3          | Intestinal | partial or subtotal gastrectomy | negative | proficient |
| TH306        | 1991 | 58  | Male   | T4a     | N3a     | Linitis plastica | G3          | Diffuse    | total gastrectomy               | negative | proficient |
| TH282        | 1989 | 66  | Male   | T4a     | N3b     | Linitis plastica | G3          | Diffuse    | total gastrectomy               | negative | deficient  |
| TH295        | 1990 | 68  | Male   | T4b     | N2      | Stump            | G3          | Mixed      | completion gastrectomy          | negative | deficient  |
| TH189        | 1985 | 57  | Male   | T3      | N2      | Distal           | G3          | Diffuse    | partial or subtotal gastrectomy | NA       | proficient |
| TH183        | 1985 | 39  | Male   | T4b     | N3b     | Distal           | G3          | Diffuse    | partial or subtotal gastrectomy | negative | proficient |
| TH712        | 2001 | 75  | Female | T4a     | N2      | Mid              | G2          | Intestinal | partial or subtotal gastrectomy | negative | proficient |
| TH1000       | 1992 | 80  | Male   | T3      | N1      | Stump            | G3          | Intestinal | total gastrectomy               | NA       | NA         |

| Summary table  |                     |     |
|----------------|---------------------|-----|
| Age (yrs)      | median              | 71  |
| Sex            | Male                | 73% |
| T Stage        | T2                  | 11% |
|                | T3                  | 34% |
|                | T4                  | 55% |
| N Stage        | N1                  | 16% |
|                | N2                  | 48% |
|                | N3                  | 36% |
| Tumor location | proximal            | 34% |
|                | distal              | 38% |
|                | others              | 28% |
| Tumor grade    | G1                  | 3%  |
|                | G2                  | 45% |
|                | G3                  | 52% |
| Lauren         | Intestinal          | 92% |
|                | Diffuse             | 6%  |
|                | Mixed               | 2%  |
| Surgery        | total               | 56% |
|                | partial or subtotal | 38% |
|                | others              | 6%  |
| EBV            | positive            | 9%  |
| MMR            | deficient           | 8%  |
