# Supplementary material for: Spatial profiling of gastric cancer patient-matched primary and locoregional metastases reveals principles of tumour dissemination
Source: PubMed Central journal article supplement — Gut. 2020 Nov 23;70(10):1823–32. doi: 10.1136/gutjnl-2020-320805 (PMC8458060; doi:10.1136/gutjnl-2020-320805), 2020-11-23
Supplement: gutjnl-2020-320805supp007.pdf [file gutjnl-2020-320805supp007.pdf]

| Patient Code | Subregion | AAMP  | ABI3BP | ACHE | ACTG2 | ACVR1 | ACVR1C |
|--------------|-----------|-------|--------|------|-------|-------|--------|
| TH313        | ln        | 8.14  | 7.74   | 8.25 | 6.71  | 7.08  | 6.56   |
|              | sup1      | 8.98  | 6.75   | 8.09 | 9.23  | 7.82  | 5.88   |
|              | sup2      | 8.88  | 6.82   | 7.54 | 9.11  | 7.67  | 6.19   |
|              | deep      | 9.69  | 8.32   | 6.88 | 10.61 | 8.46  | 2.99   |
| TH308        | ln        | 4.18  | 7.48   | 7.65 | 7.94  | 3.01  | 7.79   |
|              | sup1      | 9.45  | 6.54   | 7.75 | 8.91  | 7.67  | 6.16   |
|              | sup2      | 9.42  | 6.28   | 8.05 | 8.3   | 7.71  | 6.13   |
|              | deep      | 10.95 | 6.44   | 8.98 | 9.35  | 7.9   | 4.48   |
| TH301        | ln        | 10.04 | 7.64   | 5.54 | 6.78  | 8.3   | 4.07   |
|              | sup1      | 9.37  | 6.64   | 6.54 | 7.08  | 7.76  | 5.27   |
|              | sup2      | 9.83  | 7.24   | 7.37 | 9.48  | 8.45  | 4.38   |
|              | deep      | 9.75  | 8.7    | 5.85 | 10.84 | 8.33  | 4.27   |
| TH311        | sup1      | 8.82  | 7.32   | 6.53 | 7.98  | 7.17  | 6.78   |
|              | sup2      | 9.01  | 7.37   | 6.81 | 7.95  | 7.58  | 6.07   |
|              | deep      | 11.44 | 9.3    | 8.07 | 10.04 | 7.29  | 6.09   |
| TH293        | ln        | 8.83  | 7.86   | 7.03 | 7.74  | 7.72  | 6.53   |
|              | sup1      | 9.37  | 8.36   | 7.24 | 9.94  | 8.06  | 6.81   |
|              | deep      | 9.49  | 8.02   | 7.17 | 10.88 | 7.68  | 6.32   |
| TH286        | ln        | 10.08 | 8.21   | 7.66 | 4.15  | 7.9   | 4.15   |
|              | sup1      | 9.91  | 7.64   | 4.52 | 10.52 | 8.56  | 4.44   |
|              | deep      | 9.64  | 9.11   | 5.93 | 12.36 | 8.1   | 3.96   |
| TH195        | sup1      | 10.25 | 7.15   | 8.07 | 12.49 | 8.71  | 5.43   |
|              | sup2      | 10.39 | 7.78   | 7.72 | 11.7  | 8.8   | 5.93   |
|              | deep      | 10.03 | 8.14   | 7.72 | 13.97 | 8.83  | 4.85   |
| TH263        | ln        | 9.58  | 6.93   | 7.41 | 11.38 | 7.4   | 2.75   |
|              | sup1      | 9.63  | 6.06   | 5.08 | 9.38  | 7.51  | 3.3    |
|              | sup2      | 9.45  | 6.13   | 5.69 | 9.44  | 7.7   | 3.98   |
|              | deep      | 9.12  | 7.11   | 6.54 | 9.39  | 7.63  | 5.67   |
| TH82         | ln        | 9.23  | 5.16   | 6.65 | 7.3   | 6.88  | 6.4    |
|              | sup1      | 9.56  | 6.77   | 7.89 | 9.24  | 7.65  | 6.02   |
|              | sup2      | 9.39  | 5.55   | 6.8  | 9.37  | 7.72  | 6.05   |
|              | deep      | 9.12  | 6.44   | 7.92 | 8     | 6.73  | 6.88   |
| TH211        | ln        | 7.93  | 7.62   | 7.66 | 6.24  | 6.56  | 6.31   |
|              | sup1      | 9.32  | 7.29   | 8.71 | 11.4  | 8.62  | 4.52   |
|              | sup2      | 9.66  | 6.59   | 9.63 | 9.79  | 8.09  | 4.31   |
|              | deep      | 9.66  | 8.04   | 9.33 | 11.51 | 8.25  | 3.64   |
| TH271        | ln        | 10.16 | 6.77   | 6.15 | 5.2   | 6.79  | 3.9    |
|              | sup1      | 9.52  | 6.67   | 4.4  | 7.03  | 7.53  | 4.1    |
|              | sup2      | 9.33  | 7.62   | 4.61 | 7.43  | 7.31  | 3.83   |
|              | deep      | 9.12  | 8.27   | 4.55 | 10.36 | 7.28  | 3.99   |
| TH112        | ln        | 7.81  | 6.85   | 7.53 | 7.36  | 6.75  | 6.28   |
|              | sup1      | 8.07  | 6.9    | 7.61 | 8.12  | 7.12  | 6.34   |
|              | sup2      | 7.99  | 6.82   | 7.5  | 7.83  | 6.95  | 6.31   |
|              | deep      | 8.69  | 6      | 8.32 | 7.14  | 7.57  | 5.27   |
| TH245        | ln        | 11.97 | 5.45   | 8.93 | 3.86  | 6.86  | 4.86   |
|              | sup1      | 10.01 | 7.82   | 7.25 | 10.13 | 7.85  | 4.4    |
|              | sup2      | 9.87  | 7.91   | 7.51 | 8.59  | 8.05  | 4      |
|              | deep      | 9.54  | 8.65   | 6.64 | 12.37 | 8.14  | 3.9    |
| TH257        | ln        | 10.44 | 6.94   | 8.07 | 8.26  | 8.52  | 4.09   |
|              | sup1      | 9.92  | 4.33   | 7.21 | 8.95  | 8.79  | 1.01   |
|              | sup2      | 10.4  | 4.2    | 7.24 | 8.58  | 8.6   | 3.95   |

<https://mc.manuscriptcentral.com/gut>

|    |  |       |       |      |      |       |      |      |
|----|--|-------|-------|------|------|-------|------|------|
| 1  |  |       |       |      |      |       |      |      |
| 2  |  | deep  | 10.04 | 6.1  | 7.14 | 11.51 | 8.95 | 3.66 |
| 3  |  | ln    | 10.15 | 5.94 | 6.96 | 6.63  | 7.65 | 6.08 |
| 4  |  | sup1  | 9.91  | 6.28 | 6.94 | 7.77  | 7.96 | 6.46 |
| 5  |  | sup2  | 10.02 | 6.1  | 6.45 | 7.36  | 7.94 | 5.98 |
| 6  |  | deep  | 9.83  | 7.56 | 6.85 | 11.01 | 7.7  | 6.27 |
| 7  |  | ln    | 9.91  | 6.96 | 8.19 | 6.06  | 8.51 | 4.87 |
| 8  |  | sup1  | 10.09 | 5.8  | 9.68 | 9.19  | 8.56 | 3.25 |
| 9  |  | sup2  | 10.07 | 4.05 | 8.37 | 6.53  | 8.17 | 2.7  |
| 10 |  | deep  | 10.04 | 6.91 | 9.05 | 11.3  | 8.46 | 2.76 |
| 11 |  | ln    | 10.26 | 6.67 | 7.01 | 5.71  | 8.17 | 5.54 |
| 12 |  | sup1  | 10.23 | 6.59 | 5.35 | 8.52  | 8.31 | 5.24 |
| 13 |  | sup2  | 10.05 | 5.99 | 5.21 | 7.68  | 7.96 | 4.99 |
| 14 |  | deep  | 9.69  | 7.93 | 4.07 | 11.72 | 8.14 | 4.88 |
| 15 |  | ln    | 8.96  | 6.15 | 7.47 | 5.15  | 7.47 | 6.74 |
| 16 |  | sup1  | 10.87 | 6.15 | 7.15 | 6.04  | 6.15 | 6.6  |
| 17 |  | sup2  | 9.99  | 6.34 | 7.04 | 7.21  | 6.73 | 6.94 |
| 18 |  | deep  | 1.24  | 7.26 | 8.68 | 7.63  | 2.24 | 8.43 |
| 19 |  | ln    | 5.53  | 6.98 | 9.1  | 7.63  | 4.1  | 8.34 |
| 20 |  | sup1  | 9.29  | 6.12 | 6.71 | 7.14  | 7.91 | 6.05 |
| 21 |  | sup2  | 9.33  | 5.8  | 6.7  | 6.26  | 8.14 | 6.26 |
| 22 |  | deep  | 9.18  | 7.34 | 6.92 | 8.01  | 7.74 | 6.23 |
| 23 |  | sup1  | 9.54  | 8.19 | 7.87 | 9.58  | 8.44 | 5.45 |
| 24 |  | sup2  | 9.42  | 8.38 | 8.02 | 10.63 | 8.04 | 6.43 |
| 25 |  | deep  | 8.46  | 9.5  | 7.82 | 11.48 | 7.79 | 7.2  |
| 26 |  | sup1  | 10.59 | 7.53 | 4.81 | 9.85  | 8.83 | 4.81 |
| 27 |  | sup2  | 10.55 | 6.91 | 4.36 | 9.76  | 8.67 | 5.13 |
| 28 |  | deep  | 10.47 | 7.67 | 3.86 | 10.09 | 8.7  | 5.28 |
| 29 |  | sup1  | 9.91  | 7.1  | 6.97 | 8.43  | 7.64 | 6.45 |
| 30 |  | sup2  | 9.94  | 7.22 | 6.8  | 9.59  | 7.84 | 6.37 |
| 31 |  | deep  | 9.85  | 7.91 | 7.26 | 10.35 | 7.72 | 6.75 |
| 32 |  | ln    | 9.65  | 8.51 | 6.93 | 8.88  | 8.68 | 7.28 |
| 33 |  | sup1  | 9.64  | 7.53 | 7.32 | 9.61  | 8.34 | 6.98 |
| 34 |  | sup2  | 9.63  | 7.77 | 7.68 | 8.22  | 8    | 7.34 |
| 35 |  | ln    | 8.89  | 7.21 | 7.17 | 9.85  | 8.04 | 6.46 |
| 36 |  | sup2  | 9.08  | 7.01 | 7.58 | 8.82  | 8.03 | 6.4  |
| 37 |  | sup1  | 9.03  | 7.9  | 7.23 | 9.9   | 7.99 | 5.97 |
| 38 |  | deep  | 8.52  | 8.1  | 7.68 | 7.43  | 7.54 | 6.96 |
| 39 |  | 0ln   | 8.52  | 8.1  | 7.68 | 7.43  | 7.54 | 6.96 |
| 40 |  | 0sup1 | 9.93  | 7.58 | 8.4  | 10.78 | 8.11 | 6.86 |
| 41 |  | 0sup2 | 9.3   | 8.4  | 7.92 | 12.39 | 8.15 | 7    |
| 42 |  | 0deep | 9.27  | 7.78 | 7.73 | 10.33 | 8.7  | 6.92 |
| 43 |  | ln    | 7.49  | 7.92 | 8.15 | 7.38  | 5.51 | 7.61 |
| 44 |  | sup1  | 9.41  | 7.61 | 8.52 | 10.08 | 7.34 | 6.88 |
| 45 |  | sup2  | 9.75  | 6.89 | 8.21 | 9.73  | 7.21 | 6.47 |
| 46 |  | deep  | 8.84  | 8.61 | 8.06 | 11.96 | 6.9  | 7.24 |
| 47 |  | sup1  | 9.76  | 5.37 | 4.86 | 8.55  | 7.9  | 3.9  |
| 48 |  | sup2  | 9.78  | 4.66 | 5.16 | 7.34  | 7.71 | 3.78 |
| 49 |  | deep  | 10.09 | 6.07 | 5.84 | 8.56  | 7.67 | 3.69 |
| 50 |  | ln    | 7.23  | 7.92 | 7.03 | 7.5   | 6.2  | 7.09 |
| 51 |  | sup1  | 8.33  | 8.61 | 7.55 | 11.57 | 7.82 | 6.66 |
| 52 |  | sup2  | 8.4   | 8.21 | 7.06 | 12.11 | 7.79 | 6.95 |
| 53 |  | sup1  | 8.43  | 7.41 | 8.12 | 7.85  | 6.9  | 6.77 |
| 54 |  |       |       |      |      |       |      |      |
| 55 |  |       |       |      |      |       |      |      |
| 56 |  |       |       |      |      |       |      |      |
| 57 |  |       |       |      |      |       |      |      |
| 58 |  |       |       |      |      |       |      |      |
| 59 |  |       |       |      |      |       |      |      |
| 60 |  |       |       |      |      |       |      |      |

|    |  |       |      |       |      |       |       |      |      |
|----|--|-------|------|-------|------|-------|-------|------|------|
| 1  |  |       |      |       |      |       |       |      |      |
| 2  |  | TH705 | sup2 | 8.62  | 7.15 | 8.4   | 8.61  | 7.33 | 6.57 |
| 3  |  |       | deep | 8.19  | 7.41 | 8.44  | 8.8   | 5.87 | 7.58 |
| 4  |  |       | ln   | 8.85  | 8.56 | 7.69  | 5.97  | 7.49 | 4.86 |
| 5  |  | TH765 | sup1 | 9.62  | 8.13 | 8.96  | 11.14 | 8.54 | 4.25 |
| 6  |  |       | deep | 9.52  | 9    | 9.11  | 12.13 | 8.6  | 5.13 |
| 7  |  |       | ln   | 9.9   | 7.91 | 8.21  | 7.02  | 8    | 4.49 |
| 8  |  | TH657 | sup1 | 9.45  | 5.76 | 5.13  | 8.18  | 8.88 | 4.64 |
| 9  |  |       | sup2 | 9.47  | 6.71 | 6.23  | 9.55  | 8.75 | 3.76 |
| 10 |  |       | deep | 11.27 | 7.78 | 8.8   | 9.95  | 7.58 | 5.08 |
| 11 |  |       | ln   | 10.01 | 6.79 | 9.52  | 6.77  | 8.19 | 4.79 |
| 12 |  | TH630 | sup1 | 10.07 | 6.35 | 9.16  | 8     | 8.42 | 5.53 |
| 13 |  |       | sup2 | 8.85  | 6.46 | 8.65  | 7.24  | 7.77 | 6.83 |
| 14 |  |       | deep | 11.21 | 6.35 | 10.69 | 6.72  | 7.96 | 6.07 |
| 15 |  |       | ln   | 1.52  | 8.37 | 8.49  | 8.47  | 1.52 | 8.5  |
| 16 |  | TH201 | sup1 | 10.2  | 4.34 | 5.27  | 8.08  | 7.27 | 3.53 |
| 17 |  |       | sup2 | 10.28 | 3.83 | 4.42  | 7.42  | 7.81 | 3.74 |
| 18 |  |       | deep | 10.16 | 5.56 | 5.01  | 10.61 | 7.75 | 3.98 |
| 19 |  |       | sup1 | 9.61  | 6.92 | 5.56  | 7.35  | 8.09 | 3.96 |
| 20 |  | TH391 | sup2 | 8.71  | 6.91 | 5.89  | 7.68  | 7.55 | 5.31 |
| 21 |  |       | deep | 8.97  | 7.8  | 5.52  | 9.29  | 7.84 | 3.98 |
| 22 |  |       | ln   | 11.76 | 7.16 | 13.56 | 5.16  | 6.16 | 6.75 |
| 23 |  | TH752 | sup1 | 9.62  | 5.56 | 11.36 | 7.15  | 8.14 | 3.38 |
| 24 |  |       | deep | 9.56  | 8.3  | 10.89 | 8.96  | 7.99 | 3.71 |
| 25 |  |       | sup1 | 10.51 | 6.91 | 7.48  | 9.35  | 8    | 1.18 |
| 26 |  | TH370 | sup2 | 10.62 | 7.33 | 7.99  | 9.89  | 8.11 | 3.49 |
| 27 |  |       | deep | 9.77  | 7.46 | 6.35  | 9.1   | 8.54 | 2.86 |
| 28 |  |       | sup1 | 6.61  | 7.66 | 9.01  | 7.72  | 4.58 | 7.78 |
| 29 |  | TH439 | sup2 | 0.86  | 7.83 | 8.76  | 7.85  | 0.86 | 7.86 |
| 30 |  |       | ln   | 3.77  | 8.02 | 7.63  | 7.85  | 2.77 | 7.38 |
| 31 |  | TH589 | ln   | 8.11  | 8.19 | 6.01  | 4.1   | 8.19 | 3.18 |
| 32 |  |       | sup1 | 8.55  | 8.77 | 3.91  | 11.7  | 8.14 | 1.18 |
| 33 |  | TH660 | sup2 | 8.94  | 7.54 | 5.97  | 11.44 | 7.89 | 3.28 |
| 34 |  |       | deep | 8.1   | 8.88 | 4.61  | 10.52 | 8.22 | 4.55 |
| 35 |  |       | ln   | 6.62  | 6.28 | 7.19  | 6.64  | 3.26 | 6.89 |
| 36 |  | TH449 | sup1 | 7.4   | 6.4  | 6.99  | 7.12  | 2.57 | 6.97 |
| 37 |  |       | sup2 | 8.1   | 6.53 | 7.11  | 6.34  | 4.87 | 6.7  |
| 38 |  |       | deep | 0     | 6.3  | 7.5   | 7.11  | 1.32 | 7.16 |
| 39 |  |       | ln   | 3.66  | 6.89 | 7.24  | 6.92  | 1.34 | 6.54 |
| 40 |  | TH684 | sup1 | 4.8   | 6.85 | 7.31  | 6.9   | 2.1  | 7    |
| 41 |  |       | sup2 | 5.59  | 7.04 | 7.52  | 7.05  | 2.89 | 7.12 |
| 42 |  |       | deep | 4     | 6.32 | 7.62  | 4.41  | 2.41 | 4.41 |
| 43 |  |       | ln   | 6.81  | 7.8  | 7.95  | 7.76  | 2.64 | 8.14 |
| 44 |  | TH418 | sup1 | 2.33  | 7.92 | 8.23  | 8.16  | 1.65 | 8.29 |
| 45 |  |       | sup2 | 9.84  | 7.06 | 6.98  | 7.33  | 6.39 | 7.24 |
| 46 |  |       | deep | 7.99  | 7.21 | 7.64  | 7.84  | 4.39 | 8.02 |
| 47 |  |       | ln   | 7.86  | 7.27 | 7.11  | 7.35  | 6.4  | 7.38 |
| 48 |  | TH420 | sup1 | 6.92  | 8.07 | 7.38  | 8.09  | 4    | 8.12 |
| 49 |  |       | sup2 | 3.03  | 8.26 | 6.97  | 8.03  | 1.71 | 8.32 |
| 50 |  |       | deep | 6.16  | 7.75 | 7.74  | 7.84  | 3.71 | 7.99 |
| 51 |  |       | ln   | 9.38  | 7.33 | 6.47  | 6.54  | 6.64 | 6.99 |
| 52 |  | TH737 | sup1 | 9.05  | 6.5  | 6.05  | 6.79  | 7.27 | 7.38 |
| 53 |  |       | sup2 | 9     | 7.31 | 6.69  | 8.4   | 7.05 | 7.3  |
| 54 |  |       |      |       |      |       |       |      |      |
| 55 |  |       |      |       |      |       |       |      |      |
| 56 |  |       |      |       |      |       |       |      |      |
| 57 |  |       |      |       |      |       |       |      |      |
| 58 |  |       |      |       |      |       |       |      |      |
| 59 |  |       |      |       |      |       |       |      |      |
| 60 |  |       |      |       |      |       |       |      |      |

|    |       |      |       |      |      |       |      |      |
|----|-------|------|-------|------|------|-------|------|------|
| 1  |       |      |       |      |      |       |      |      |
| 2  |       | deep | 8.55  | 7.43 | 7.19 | 6.31  | 7.27 | 7.43 |
| 3  |       | ln   | 9.94  | 7.56 | 6.67 | 7.72  | 8.37 | 6.1  |
| 4  | TH276 | sup1 | 9.82  | 7.47 | 6.66 | 10.24 | 8.55 | 6.21 |
| 5  |       | sup2 | 9.76  | 6.17 | 6.44 | 8.3   | 8.27 | 6.55 |
| 6  |       | deep | 9.75  | 6.25 | 6.44 | 8.45  | 8.41 | 6.34 |
| 7  |       | ln   | 9.74  | 7.21 | 7.62 | 6.72  | 8.26 | 6.39 |
| 8  | TH309 | sup1 | 11.08 | 8.19 | 8.04 | 9.5   | 8.64 | 5.23 |
| 9  |       | sup2 | 10.5  | 7.61 | 7.68 | 9.99  | 8.59 | 4.98 |
| 10 |       | deep | 10.71 | 9.5  | 6.93 | 13.61 | 8.5  | 4.99 |
| 11 |       | ln   | 10.27 | 6.44 | 8.9  | 7.27  | 8.86 | 4.57 |
| 12 | TH128 | sup1 | 9.92  | 7.92 | 8.48 | 10.24 | 9    | 5.34 |
| 13 |       | sup2 | 9.94  | 6.89 | 9.47 | 10.3  | 9.15 | 4.71 |
| 14 |       | deep | 10.04 | 7.55 | 8.7  | 11.52 | 9.04 | 4.39 |
| 15 |       | ln   | 9.59  | 6.65 | 8.07 | 6.34  | 7.75 | 5.54 |
| 16 | TH387 | sup1 | 10.25 | 6.67 | 8.82 | 8.67  | 7.96 | 3.42 |
| 17 |       | deep | 9.77  | 9.05 | 7.49 | 12.08 | 7.23 | 6.19 |
| 18 |       | ln   | 9     | 8.93 | 8.25 | 7.19  | 8.05 | 4.58 |
| 19 | TH266 | sup1 | 9.3   | 7.63 | 5.8  | 9.74  | 8.51 | 4.99 |
| 20 |       | deep | 9.51  | 8.61 | 6.13 | 13.91 | 8.71 | 3.1  |
| 21 |       | ln   | 9.83  | 8.21 | 5.36 | 7.18  | 7.92 | 4.63 |
| 22 | TH314 | sup1 | 9.05  | 5.33 | 4.67 | 9.44  | 8.43 | 5.22 |
| 23 |       | sup2 | 9.46  | 5.06 | 4.61 | 8.55  | 8.22 | 5.57 |
| 24 |       | sup1 | 9.2   | 7.33 | 6.89 | 9.54  | 8.01 | 5.69 |
| 25 | TH803 | sup2 | 9.52  | 7.45 | 7.1  | 9.61  | 8.04 | 5.45 |
| 26 |       | deep | 11.34 | 9.08 | 8.96 | 11.94 | 8.01 | 5.15 |
| 27 |       | ln   | 8.63  | 7.42 | 6.67 | 5.61  | 6.65 | 2.36 |
| 28 | TH730 | sup1 | 8.35  | 7.33 | 6.18 | 10.35 | 7.38 | 2.79 |
| 29 |       | sup2 | 8.76  | 6.45 | 6.24 | 7.61  | 7.21 | 4.01 |
| 30 |       | deep | 9.38  | 8.41 | 5.22 | 13.91 | 8.2  | 3.9  |
| 31 |       | ln   | 4.08  | 6.62 | 7.01 | 7.22  | 2.76 | 6.62 |
| 32 | TH659 | sup1 | 5.97  | 6.87 | 7.11 | 6.87  | 2.3  | 6.72 |
| 33 |       | sup2 | 0.88  | 7.29 | 6.69 | 7.13  | 0.88 | 7.11 |
| 34 |       | deep | 3.76  | 7.3  | 6.89 | 7     | 0.96 | 7.2  |
| 35 |       | ln   | 7.76  | 6.42 | 7.09 | 5.84  | 6.27 | 5.47 |
| 36 | TH329 | sup1 | 7.09  | 6.86 | 6.17 | 8.61  | 5.81 | 5.95 |
| 37 |       | sup2 | 6.77  | 7.3  | 6.21 | 9.06  | 6.55 | 5.96 |
| 38 |       | deep | 7.21  | 7.72 | 5.83 | 9.74  | 6.5  | 5.75 |
| 39 |       | ln   | 8.81  | 7.89 | 7.76 | 6.05  | 6.98 | 3.68 |
| 40 | TH196 | sup1 | 9.81  | 7.53 | 7.22 | 9.05  | 8.24 | 4.27 |
| 41 |       | sup1 | 10.49 | 6.61 | 4.42 | 7.54  | 7.89 | 3.42 |
| 42 | TH679 | sup2 | 11.67 | 7.91 | 6.93 | 7.14  | 7.59 | 4.82 |
| 43 |       | deep | 9.55  | 7.03 | 8.61 | 6.11  | 7.49 | 6.06 |
| 44 |       | ln   | 11    | 8.42 | 7.51 | 10.29 | 7.1  | 4.51 |
| 45 | TH194 | sup1 | 10.04 | 8.03 | 7.11 | 10.59 | 8.27 | 5.62 |
| 46 |       | deep | 10.14 | 8.33 | 7.76 | 12.7  | 8.5  | 5.33 |
| 47 |       | ln   | 10.21 | 5.64 | 7.37 | 4.49  | 7.33 | 5.68 |
| 48 | TH300 | sup1 | 9.87  | 7.55 | 7.3  | 12.54 | 7.17 | 5.19 |
| 49 |       | sup2 | 10.15 | 7.7  | 6.6  | 12.25 | 7.56 | 5.13 |
| 50 |       | deep | 9.67  | 7.92 | 6.98 | 12.52 | 7.27 | 5.87 |
| 51 |       | ln   | 9.31  | 6.68 | 7.29 | 6.03  | 7.4  | 4.27 |
| 52 | TH306 | sup1 | 8.11  | 7.13 | 5.85 | 10.24 | 7.08 | 5.66 |
| 53 |       | sup2 | 7.89  | 6.81 | 6.08 | 9.45  | 7.05 | 5.69 |
| 54 |       |      |       |      |      |       |      |      |
| 55 |       |      |       |      |      |       |      |      |
| 56 |       |      |       |      |      |       |      |      |
| 57 |       |      |       |      |      |       |      |      |
| 58 |       |      |       |      |      |       |      |      |
| 59 |       |      |       |      |      |       |      |      |
| 60 |       |      |       |      |      |       |      |      |

|  |      |       |      |      |       |      |      |
|--|------|-------|------|------|-------|------|------|
|  | deep | 9.41  | 7.85 | 6.04 | 12.7  | 7.54 | 4.11 |
|  | ln   | 8.53  | 6.68 | 6.39 | 7.29  | 6.88 | 4.42 |
|  | sup1 | 8.57  | 4.59 | 5.17 | 8.12  | 7.14 | 5.05 |
|  | sup2 | 8.46  | 5.29 | 5.44 | 8.77  | 7.17 | 4.19 |
|  | deep | 8.09  | 6.08 | 7.11 | 7.25  | 1.55 | 6.91 |
|  | ln   | 9.26  | 6.89 | 6.51 | 5.94  | 7.11 | 3.73 |
|  | sup1 | 9.79  | 6    | 4.82 | 6.57  | 7.32 | 4.9  |
|  | sup2 | 9.88  | 5.33 | 5.16 | 6.37  | 7.09 | 4.52 |
|  | deep | 1.27  | 6.99 | 7.67 | 7.56  | 1.27 | 7.95 |
|  | sup1 | 7.71  | 8.18 | 6.8  | 9.63  | 6.5  | 6.55 |
|  | ln   | 8.78  | 9.13 | 6.88 | 3.24  | 7.93 | 3.56 |
|  | sup1 | 8.64  | 7.72 | 6.75 | 11.85 | 8.03 | 5.53 |
|  | sup2 | 9.11  | 8.75 | 6.19 | 12.18 | 8.23 | 4.62 |
|  | deep | 8.47  | 9.58 | 6.01 | 10.6  | 8.11 | 5.37 |
|  | ln   | 12.02 | 5.87 | 8.9  | 5.87  | 7.4  | 3.54 |
|  | sup2 | 10.38 | 7.71 | 6.46 | 7.96  | 6.74 | 3.12 |
|  | sup1 | 9.17  | 7.99 | 5.86 | 9.44  | 6.61 | 5.63 |
|  | deep | 10.73 | 7.78 | 6.4  | 7.72  | 6.93 | 3.34 |

1  
2  
3  
4  
5  
6  
7  
8  
9  
10  
11  
12  
13  
14  
15  
16  
17  
18  
19  
20  
21  
22  
23  
24  
25  
26  
27  
28  
29  
30  
31  
32  
33  
34  
35  
36  
37  
38  
39  
40  
41  
42  
43  
44  
45  
46  
47  
48  
49  
50  
51  
52  
53  
54  
55  
56  
57  
58  
59  
60

| ACVRL1 | ADAM15 | ADAM17 | ADAM28 | ADAM8 | ADAM9 | ADAMTS1 | ADAMTS12 | ADAMTS8 |
|--------|--------|--------|--------|-------|-------|---------|----------|---------|
| 7.31   | 8.28   | 8.19   | 8.8    | 6     | 8.9   | 8.13    | 7.09     | 2.37    |
| 8.04   | 9.6    | 8.13   | 8.18   | 5.79  | 9.39  | 9.95    | 7.12     | 4.48    |
| 7.9    | 9.89   | 8.27   | 7.8    | 5.64  | 9.23  | 9.22    | 6.82     | 4.4     |
| 8.25   | 10.92  | 8.98   | 8.02   | 6.64  | 9.47  | 10.82   | 6.92     | 5.96    |
| 7.59   | 8.37   | 8.2    | 1.01   | 2.01  | 1.01  | 8.85    | 8.42     | 3.33    |
| 8.1    | 9      | 8.21   | 6.57   | 7.05  | 7.88  | 8.42    | 7.65     | 4.08    |
| 8.24   | 9.01   | 8.21   | 7.63   | 7.35  | 8.37  | 8.91    | 7.16     | 2.24    |
| 7.68   | 11.09  | 9.04   | 7.58   | 8.28  | 8.69  | 9.51    | 7.35     | 5.98    |
| 7.29   | 10.01  | 9.19   | 9.52   | 7.7   | 9.78  | 8.26    | 7.26     | 0.37    |
| 6.74   | 9.7    | 8.5    | 7.93   | 6.57  | 9.41  | 7.05    | 7.45     | 2.72    |
| 7.12   | 10.34  | 8.75   | 8.68   | 6.68  | 10    | 8.39    | 7.09     | 4.47    |
| 7.95   | 10.81  | 9.12   | 8.39   | 7.55  | 10.04 | 9.38    | 7.37     | 7.72    |
| 7.14   | 9.03   | 8.51   | 6.89   | 4.58  | 7.37  | 7.87    | 7.06     | 3.35    |
| 7.71   | 9.6    | 8.69   | 5.53   | 5.9   | 7.87  | 8.37    | 7.79     | 2.48    |
| 6.98   | 12.42  | 10.09  | 7.44   | 6.63  | 8.13  | 9.9     | 5.58     | 5.67    |
| 7.67   | 8.99   | 9.18   | 7.53   | 8.12  | 8.9   | 10.04   | 7.54     | 3.94    |
| 7.15   | 9.45   | 8.99   | 6.5    | 7.4   | 9.24  | 9.32    | 7.89     | 5.29    |
| 7.25   | 9.27   | 9.14   | 5.85   | 7.6   | 9.48  | 9.43    | 7.78     | 4.46    |
| 7.83   | 10.66  | 9.98   | 10.12  | 7.71  | 8.26  | 9.74    | 6.07     | 3.48    |
| 8.31   | 9.94   | 8.82   | 10     | 6.77  | 9.81  | 9.63    | 6.84     | 4.31    |
| 8.33   | 10.01  | 9.27   | 9.11   | 7.35  | 8.81  | 10.14   | 6.14     | 6.07    |
| 8.71   | 10.53  | 9.93   | 6.76   | 7.29  | 10.41 | 9.71    | 7.14     | 6.08    |
| 8.54   | 10.53  | 10     | 7.07   | 7.64  | 10.63 | 10.17   | 6.26     | 5.93    |
| 8.14   | 10.25  | 9.92   | 7.56   | 7.46  | 10.36 | 10.17   | 7.51     | 6.66    |
| 6.77   | 8.65   | 8.68   | 5.75   | 6.4   | 7.7   | 8.15    | 4.6      | 3.01    |
| 7.48   | 10.01  | 8.57   | 7.17   | 6.5   | 9.58  | 8.8     | 5.34     | 4.38    |
| 7.09   | 9.75   | 8.79   | 7.12   | 6.25  | 9.45  | 8.43    | 5.11     | 3.33    |
| 7.24   | 9.56   | 8.62   | 7.72   | 6.6   | 8.83  | 9.2     | 6.32     | 4.24    |
| 6.37   | 10.28  | 8.41   | 6.38   | 4.91  | 8.38  | 7.9     | 6.24     | 2.7     |
| 7.14   | 10.48  | 8.6    | 6.94   | 6.23  | 8.33  | 8.43    | 6.46     | 5.68    |
| 6.9    | 10.81  | 8.22   | 6.64   | 5.1   | 8.81  | 7.7     | 6.46     | 4.84    |
| 6.77   | 10.56  | 8.6    | 6.52   | 4.41  | 8.09  | 8.63    | 7.38     | 4.29    |
| 7.83   | 7.7    | 8.77   | 8.93   | 6.66  | 6.72  | 9.76    | 6.97     | 2.52    |
| 8.2    | 9.68   | 9.13   | 7.85   | 8.06  | 9.84  | 8.54    | 8.67     | 3.64    |
| 8.12   | 10.18  | 9.05   | 8.3    | 8.1   | 10.16 | 8.54    | 7.93     | 3.7     |
| 7.7    | 10.34  | 9.35   | 8.16   | 7.9   | 9.89  | 9.47    | 8.13     | 6.09    |
| 6.25   | 10.24  | 8.88   | 7.71   | 6.75  | 9.32  | 9.19    | 4.69     | 3.62    |
| 7.19   | 9.85   | 8.62   | 6.55   | 7.18  | 9.54  | 7.62    | 6.37     | 3.99    |
| 7.13   | 9.45   | 8.8    | 6.84   | 7.01  | 8.52  | 8.24    | 6.41     | 3.17    |
| 7.11   | 9.51   | 8.69   | 7.24   | 7.07  | 8.68  | 8.16    | 5.5      | 5.27    |
| 7.07   | 8.58   | 8.22   | 6.42   | 6.78  | 7.36  | 8.1     | 7.09     | 1.83    |
| 6.77   | 8.54   | 8.24   | 6.05   | 6.54  | 7.91  | 7.6     | 7.5      | 2.7     |
| 7.06   | 8.17   | 8.15   | 5.31   | 6.58  | 7.05  | 7.69    | 7.48     | 3.8     |
| 6.86   | 8.81   | 8.43   | 6.04   | 6.79  | 7.82  | 6.86    | 6.83     | 2.62    |
| 5.18   | 11.89  | 10.07  | 5.45   | 6.86  | 7.61  | 9.65    | 4.45     | 4.86    |
| 7.27   | 9.32   | 8.42   | 8.23   | 5.77  | 9.1   | 9.11    | 5.02     | 4.56    |
| 7.51   | 9.36   | 8.61   | 6.06   | 6.27  | 8.97  | 8.79    | 6.57     | 4.25    |
| 7.66   | 9.23   | 8.83   | 6.41   | 6.18  | 8.56  | 8.79    | 6.69     | 3.9     |
| 7.55   | 9.9    | 9.6    | 7.57   | 7.44  | 10.09 | 9.29    | 6.63     | 0.63    |
| 7.7    | 9.75   | 9.66   | 6.84   | 7.78  | 10.66 | 7.89    | 7.49     | 3.18    |
| 7.72   | 9.19   | 9.51   | 6.47   | 7.68  | 10.88 | 7.97    | 6.94     | 4.2     |

<https://mc.manuscriptcentral.com/gut>

1  
2  
3  
4  
5  
6  
7  
8  
9  
10  
11  
12  
13  
14  
15  
16  
17  
18  
19  
20  
21  
22  
23  
24  
25  
26  
27  
28  
29  
30  
31  
32  
33  
34  
35  
36  
37  
38  
39  
40  
41  
42  
43  
44  
45  
46  
47  
48  
49  
50  
51  
52  
53  
54  
55  
56  
57  
58  
59  
60

|      |       |      |       |      |       |       |      |      |
|------|-------|------|-------|------|-------|-------|------|------|
| 7.78 | 9.53  | 9.73 | 6.86  | 7.97 | 10.72 | 9.09  | 7.56 | 4.33 |
| 7.13 | 10.55 | 8.95 | 5.84  | 5.24 | 8.14  | 8.34  | 6.49 | 1.03 |
| 7.9  | 10.46 | 8.76 | 5.58  | 6.26 | 8.24  | 8.92  | 7.07 | 3.89 |
| 7.59 | 10.63 | 8.87 | 5.81  | 5.65 | 8.5   | 8.56  | 6.82 | 2.54 |
| 7.61 | 10.11 | 8.89 | 5.99  | 5.97 | 8.1   | 8.8   | 6.99 | 5.39 |
| 7.35 | 9.6   | 8.81 | 8.36  | 6.72 | 10.6  | 8.87  | 6.23 | 2.55 |
| 7.43 | 10.36 | 8.94 | 6.53  | 6.8  | 10.83 | 9.19  | 6.13 | 4.25 |
| 6.55 | 10.52 | 8.64 | 5.34  | 4.76 | 11.16 | 8.27  | 5.65 | 2    |
| 7.35 | 10.42 | 9.16 | 6.63  | 6.55 | 10.54 | 9.52  | 6.19 | 5.35 |
| 6.49 | 10.11 | 8.63 | 7.36  | 6.48 | 8.67  | 7.62  | 5.85 | 2.17 |
| 7.14 | 10.81 | 8.82 | 8.55  | 6.1  | 9.26  | 8.1   | 5.71 | 4.13 |
| 6.84 | 10.74 | 8.54 | 7.21  | 6.08 | 9.28  | 7.22  | 5.99 | 3.27 |
| 7.04 | 10.46 | 8.6  | 7.2   | 5.5  | 8.89  | 8.19  | 6.52 | 4.79 |
| 8.74 | 13.16 | 8.96 | 5.15  | 7.15 | 7.15  | 9.32  | 6.15 | 6.15 |
| 8.68 | 11.64 | 9.37 | 6.88  | 6.57 | 8.08  | 9.08  | 6.96 | 2.37 |
| 7.94 | 10.18 | 9.09 | 7.13  | 6.38 | 7.78  | 8.33  | 7.41 | 3.18 |
| 9.57 | 6.35  | 9.57 | 1.24  | 0.24 | 1.83  | 9.94  | 8.69 | 0.24 |
| 8.9  | 9.62  | 9.3  | 2.77  | 1.77 | 3.1   | 9.59  | 8.18 | 2.36 |
| 6.75 | 10.36 | 8.38 | 4.6   | 4.95 | 9.76  | 7.57  | 6.62 | 2.95 |
| 6.7  | 10.16 | 8.35 | 4.07  | 4.55 | 9.92  | 7.61  | 6.42 | 2.96 |
| 6.92 | 10.17 | 8.37 | 5.69  | 5.2  | 9.54  | 8.34  | 6.96 | 2.99 |
| 7.56 | 10.48 | 9.1  | 7.56  | 5.77 | 8.85  | 10.55 | 7.12 | 4.68 |
| 7.5  | 10.03 | 8.87 | 7.52  | 5.23 | 9.23  | 10.09 | 6.92 | 4.8  |
| 7.14 | 8.83  | 9.09 | 6.57  | 4.63 | 8.17  | 10.02 | 7.56 | 5.05 |
| 8.01 | 10.99 | 9.3  | 10.14 | 7.43 | 10.66 | 9.31  | 6.99 | 4.44 |
| 8.01 | 10.89 | 9.65 | 9.28  | 7.94 | 10.68 | 9.25  | 7.96 | 4.36 |
| 7.84 | 10.83 | 9.75 | 9.07  | 8.29 | 10.54 | 9.34  | 7.62 | 5.45 |
| 7.81 | 9.66  | 9.17 | 6.97  | 5.68 | 7.74  | 8.73  | 7.63 | 4.17 |
| 7.79 | 9.76  | 9.33 | 6.19  | 6.25 | 7.61  | 8.82  | 7.85 | 4.3  |
| 7.41 | 9.79  | 9.33 | 6.04  | 5.64 | 7.58  | 9.02  | 7.72 | 5.36 |
| 8.91 | 9.63  | 9.05 | 7.95  | 5.67 | 8.68  | 10.55 | 7.27 | 3.82 |
| 8.18 | 9.97  | 9    | 8.09  | 5.52 | 8.91  | 7.91  | 7.2  | 4.37 |
| 8.52 | 9.83  | 9    | 8.09  | 5.99 | 8.47  | 8.31  | 7.37 | 3.99 |
| 7.44 | 9.38  | 9.2  | 6.5   | 5.94 | 9.94  | 8.14  | 8.34 | 3.64 |
| 7.28 | 9.77  | 9.04 | 7.3   | 6.55 | 10.3  | 8.09  | 8.01 | 4.27 |
| 7.66 | 9.59  | 9.31 | 5.75  | 6.17 | 9.77  | 8.96  | 8.21 | 3.62 |
| 7.51 | 9.35  | 9.08 | 7.73  | 5.79 | 8.28  | 8.75  | 7.73 | 3.76 |
| 7.51 | 9.35  | 9.08 | 7.73  | 5.79 | 8.28  | 8.75  | 7.73 | 3.76 |
| 7.41 | 10.62 | 9.16 | 6.51  | 5.9  | 8.1   | 8.76  | 7.02 | 5.32 |
| 7.19 | 10.17 | 9.02 | 6.65  | 5.64 | 8.31  | 9.67  | 7.56 | 5.96 |
| 7.49 | 10.15 | 9.28 | 6.45  | 6.32 | 8.51  | 8.86  | 7.77 | 3.39 |
| 7.58 | 7.62  | 8.88 | 7.89  | 6.36 | 7.75  | 8.56  | 7.78 | 4.46 |
| 7.77 | 8.85  | 9.09 | 8.83  | 6.93 | 9.52  | 8.69  | 7.84 | 4.69 |
| 7.99 | 9.02  | 8.91 | 7.94  | 6.29 | 9.68  | 8.3   | 7.46 | 3.65 |
| 7.86 | 9.15  | 8.94 | 7.92  | 5.86 | 8.65  | 9.23  | 8.15 | 5.2  |
| 7.77 | 10.5  | 9.32 | 7.01  | 6.27 | 9.73  | 8.51  | 7.41 | 4.53 |
| 7.74 | 10.83 | 9.14 | 6.65  | 6.01 | 9.96  | 7.35  | 6.6  | 4.6  |
| 7.56 | 11.25 | 9.73 | 7.02  | 7.23 | 9.34  | 8.68  | 7.3  | 4.42 |
| 7.37 | 7.29  | 8.4  | 7.24  | 5.65 | 7.62  | 8.68  | 7.5  | 4.48 |
| 7.78 | 9.01  | 8.61 | 6.26  | 4.97 | 8.04  | 9.95  | 8.31 | 6.95 |
| 7.45 | 8.75  | 8.51 | 5.95  | 4.16 | 8.16  | 8.66  | 7.7  | 6.78 |
| 7.12 | 9.7   | 8.2  | 6.23  | 5.98 | 8.22  | 8.58  | 7.74 | 3.72 |

<https://mc.manuscriptcentral.com/gut>

1  
2  
3  
4  
5  
6  
7  
8  
9  
10  
11  
12  
13  
14  
15  
16  
17  
18  
19  
20  
21  
22  
23  
24  
25  
26  
27  
28  
29  
30  
31  
32  
33  
34  
35  
36  
37  
38  
39  
40  
41  
42  
43  
44  
45  
46  
47  
48  
49  
50  
51  
52  
53  
54  
55  
56  
57  
58  
59  
60

|       |       |       |      |      |       |       |      |      |
|-------|-------|-------|------|------|-------|-------|------|------|
| 7.55  | 9.98  | 8.48  | 7.06 | 6.77 | 8.93  | 8.42  | 8.27 | 4.06 |
| 7.92  | 10.63 | 8.95  | 4.68 | 5.75 | 7.81  | 9.13  | 8.13 | 5.39 |
| 7.89  | 9.23  | 9.2   | 8.83 | 7.24 | 8.87  | 10.07 | 6.22 | 3.25 |
| 8.18  | 10.47 | 8.93  | 7.99 | 7.5  | 9.58  | 9.48  | 7.49 | 5.36 |
| 8.37  | 10.28 | 8.95  | 8.18 | 8.14 | 9.79  | 9.85  | 8.36 | 5.62 |
| 7.31  | 10.33 | 9.43  | 8.55 | 6.71 | 9.56  | 9.76  | 7.19 | 2.41 |
| 7.16  | 9.93  | 8.87  | 7.16 | 6.16 | 10.9  | 7.16  | 7.91 | 3.72 |
| 7.5   | 9.89  | 9     | 6.83 | 6.8  | 10.79 | 8.52  | 8.12 | 4.4  |
| 6.4   | 12.76 | 10.26 | 7.14 | 7.62 | 10.54 | 9.83  | 7.49 | 6.49 |
| 7.15  | 10.2  | 9.05  | 8.01 | 6.38 | 9.4   | 9.12  | 6.18 | 3.79 |
| 6.79  | 10.09 | 8.82  | 7.49 | 6.47 | 10.04 | 8.07  | 5.58 | 4.4  |
| 6.74  | 8.79  | 8     | 6.82 | 5.32 | 9.51  | 7.3   | 7.02 | 3.48 |
| 6.78  | 12.24 | 9.6   | 6.72 | 7.12 | 9.64  | 9.14  | 7.3  | 4.58 |
| 7.54  | 5.8   | 9.37  | 0    | 1.52 | 0.2   | 9.13  | 7.53 | 2.2  |
| 6.98  | 10.93 | 8.78  | 4.8  | 7.38 | 8.2   | 7.63  | 7.53 | 0.95 |
| 7.28  | 10.94 | 8.79  | 4.83 | 7.87 | 8.44  | 7.79  | 7.02 | 1.42 |
| 6.98  | 10.83 | 8.85  | 5.61 | 7.61 | 8.37  | 8.22  | 6.68 | 4.38 |
| 7.69  | 9.29  | 8.72  | 9.01 | 7.87 | 9.54  | 8.19  | 7.14 | 3.76 |
| 7.36  | 8.2   | 8.35  | 7.2  | 6.99 | 8.69  | 7.82  | 7.51 | 3.47 |
| 7.38  | 8.85  | 8.51  | 7.72 | 7.47 | 9.06  | 8.58  | 7.43 | 3.79 |
| 5.16  | 14.61 | 9.62  | 5.16 | 5.16 | 5.16  | 9.16  | 6.75 | 6.16 |
| 6.77  | 8.13  | 8.36  | 8.95 | 6.76 | 9.14  | 8.03  | 5.24 | 3.53 |
| 7.28  | 9.18  | 8.76  | 9.05 | 7.57 | 8.97  | 8.44  | 6.21 | 4.71 |
| 6.39  | 10.34 | 9.28  | 6.61 | 5.77 | 8.31  | 8.72  | 5.64 | 5.82 |
| 6.43  | 11.5  | 9.38  | 7.14 | 5.76 | 8.09  | 9.18  | 6.26 | 6.15 |
| 7.26  | 10.03 | 9.35  | 7.48 | 6.19 | 8.52  | 8.66  | 7.02 | 3.35 |
| 7     | 7.7   | 8.41  | 4.58 | 4.32 | 6.55  | 8.7   | 8.5  | 4.58 |
| 7.11  | 3.44  | 7.99  | 1.86 | 2.86 | 2.44  | 8.49  | 8.57 | 4.03 |
| 7.12  | 5.47  | 8.02  | 2.77 | 3.35 | 3.35  | 8.45  | 8.03 | 4.57 |
| 7     | 8.82  | 8.09  | 7.66 | 6.14 | 8.48  | 9.01  | 6.42 | 2.01 |
| 7.27  | 9.15  | 8.05  | 5.97 | 5.76 | 8.37  | 8.87  | 7.34 | 6.61 |
| 6.74  | 9.79  | 7.88  | 7.06 | 4.63 | 8.3   | 9.43  | 6.04 | 7.03 |
| 7.39  | 8.93  | 8.66  | 6.69 | 5.36 | 8.03  | 11.05 | 6.5  | 5.65 |
| 7.12  | 7.64  | 7.93  | 0.45 | 2.77 | 4.91  | 8.24  | 7.32 | 2.77 |
| 6.44  | 8.18  | 7.4   | 3.25 | 0.25 | 5.92  | 7.3   | 7.01 | 2.84 |
| 5.93  | 8.26  | 7.64  | 3.51 | 2.67 | 7.14  | 7.07  | 6.99 | 2.93 |
| 8.05  | 3.13  | 8.27  | 0    | 0    | 0     | 8.29  | 7.32 | 2.13 |
| 6.51  | 5.51  | 7.68  | 3.34 | 2.34 | 4.66  | 8.06  | 7.78 | 3.92 |
| 6.45  | 6.35  | 7.47  | 1.1  | 2.68 | 5.1   | 7.74  | 7.4  | 4.68 |
| 6.44  | 6.22  | 7.72  | 0.31 | 3.89 | 5.26  | 7.59  | 7.46 | 4.63 |
| 10.39 | 6.66  | 7.41  | 2.41 | 2.41 | 4.41  | 8.41  | 5.73 | 3.41 |
| 7.74  | 6.73  | 8.51  | 4.76 | 3.38 | 6.14  | 8.47  | 8.12 | 4.96 |
| 7.64  | 3.41  | 8.51  | 0.91 | 2.13 | 0     | 8.84  | 8.5  | 4.18 |
| 6.67  | 8.83  | 8.33  | 8.44 | 6.12 | 8.82  | 8.41  | 7.48 | 3.45 |
| 7.58  | 7.66  | 8.44  | 5.11 | 3.56 | 7     | 8.76  | 8.05 | 3.66 |
| 7.27  | 8.54  | 8.53  | 5.82 | 5.23 | 7.28  | 8.41  | 7.44 | 4.16 |
| 7.53  | 7.98  | 8.61  | 2.62 | 2.3  | 7.3   | 8.59  | 7.83 | 4.54 |
| 7.41  | 4.61  | 8.43  | 0.71 | 1.71 | 1.71  | 8.49  | 8.09 | 4.17 |
| 8.8   | 7.37  | 8.82  | 1.48 | 2.48 | 6.26  | 9.03  | 8.26 | 3.6  |
| 7.09  | 8.68  | 8.14  | 5.27 | 4.82 | 7.18  | 7.63  | 6.65 | 3.08 |
| 7.17  | 9.34  | 8.47  | 5.93 | 5.6  | 7.44  | 7.26  | 7.66 | 2.55 |
| 7.5   | 9.24  | 8.3   | 6.1  | 5.84 | 7.57  | 7.6   | 7.7  | 3.74 |

<https://mc.manuscriptcentral.com/gut>



1  
2  
3  
4  
5  
6  
7  
8  
9  
10  
11  
12  
13  
14  
15  
16  
17  
18  
19  
20  
21  
22  
23  
24  
25  
26  
27  
28  
29  
30  
31  
32  
33  
34  
35  
36  
37  
38  
39  
40  
41  
42  
43  
44  
45  
46  
47  
48  
49  
50  
51  
52  
53  
54  
55  
56  
57  
58  
59  
60

|      |       |       |       |      |       |       |      |      |
|------|-------|-------|-------|------|-------|-------|------|------|
| 7.32 | 8.7   | 8.31  | 6.48  | 5.55 | 7.31  | 8.02  | 7.45 | 2.85 |
| 7.6  | 10.44 | 9.27  | 8.45  | 6.4  | 8.74  | 9.34  | 7.39 | 3.52 |
| 7.96 | 10.8  | 9.12  | 8.7   | 6.67 | 9.17  | 9.66  | 7.66 | 3.74 |
| 7.03 | 10.31 | 8.98  | 7.54  | 5.95 | 8.65  | 8.13  | 7.4  | 3.33 |
| 7.27 | 10.47 | 9.06  | 7.86  | 6.18 | 8.74  | 8     | 7.45 | 1.27 |
| 7.94 | 10.25 | 9.16  | 7.93  | 7.33 | 8.37  | 9.36  | 7.86 | 3.57 |
| 7.78 | 11.87 | 9.31  | 8.15  | 7.5  | 10.15 | 9.79  | 6.37 | 6.3  |
| 7.76 | 10.84 | 8.68  | 8.16  | 6.72 | 10.34 | 9.33  | 5.23 | 5.41 |
| 7.93 | 11.68 | 9.44  | 7.97  | 7.43 | 9.16  | 11.11 | 5.65 | 8.88 |
| 7.98 | 10.24 | 10.05 | 9.62  | 8.89 | 11.27 | 9.13  | 7.82 | 3.57 |
| 8    | 10.07 | 9.31  | 8.18  | 7.91 | 10.5  | 9.68  | 8.32 | 5.41 |
| 7.85 | 9.88  | 9.46  | 8.62  | 8.37 | 10.66 | 9.06  | 8.61 | 2.97 |
| 7.67 | 10.25 | 9.74  | 7.99  | 8.22 | 10.92 | 9.29  | 7.43 | 5.06 |
| 7.02 | 9.05  | 8.64  | 7.42  | 7    | 8.73  | 7.52  | 6.56 | 1.8  |
| 7.81 | 9.92  | 8.94  | 7.77  | 7.37 | 9.43  | 8.85  | 5.83 | 4.37 |
| 7.17 | 10.31 | 9     | 6.67  | 6.98 | 8.51  | 9.82  | 7.08 | 7.52 |
| 8    | 9.27  | 8.85  | 8.66  | 7.11 | 8.6   | 9.31  | 6.15 | 3.45 |
| 7.89 | 10.11 | 8.87  | 6.97  | 7.11 | 9.83  | 7.71  | 7.6  | 4.13 |
| 7.96 | 9.99  | 9.22  | 6.91  | 7.43 | 9.74  | 8.94  | 8.4  | 5.8  |
| 6.72 | 10.83 | 8.84  | 7.93  | 6.85 | 10.55 | 9.41  | 4.68 | 2.25 |
| 7.66 | 8.93  | 9     | 5.69  | 5.61 | 8.66  | 8.16  | 7.84 | 2.54 |
| 7.59 | 9.13  | 9.01  | 5.09  | 5.23 | 8.73  | 7.99  | 5.75 | 3.06 |
| 7.46 | 9.86  | 8.71  | 8.59  | 7.01 | 8.64  | 10.5  | 7.06 | 6.06 |
| 7.45 | 9.89  | 8.97  | 8.06  | 7.59 | 9.26  | 9.83  | 7.1  | 5.25 |
| 7.24 | 12.49 | 10.92 | 7.96  | 8.24 | 9.15  | 12.07 | 6.47 | 9.7  |
| 6.38 | 7.91  | 8.18  | 6.79  | 6.01 | 6.65  | 8.48  | 4.75 | 3.17 |
| 7.53 | 8.26  | 7.91  | 7.3   | 4.79 | 8.02  | 9.8   | 5.43 | 4.25 |
| 7.23 | 8.16  | 7.76  | 5.35  | 4.97 | 7.6   | 8.07  | 6.36 | 4.01 |
| 7.03 | 9.09  | 7.85  | 6.6   | 5.71 | 8.01  | 9.35  | 5.48 | 5.48 |
| 6.93 | 6.08  | 7.51  | 1.76  | 1.76 | 1.76  | 7.91  | 7.54 | 2.76 |
| 6.74 | 8.79  | 7.24  | 0.72  | 4.3  | 5.81  | 7.64  | 7.55 | 2.72 |
| 6.86 | 2.47  | 7.5   | 0.88  | 1.88 | 2.88  | 7.53  | 7.83 | 3.47 |
| 6.66 | 6.38  | 7.43  | 2.54  | 2.54 | 3.76  | 7.74  | 8.05 | 3.54 |
| 6.44 | 8.53  | 7.73  | 5.93  | 5.22 | 7.99  | 7.09  | 5.97 | 1.94 |
| 6.76 | 8.55  | 7.42  | 5.61  | 5.12 | 7.17  | 7.49  | 6.63 | 3.83 |
| 6.83 | 8.36  | 7.58  | 4.16  | 5.7  | 7.13  | 7.55  | 6.56 | 5.12 |
| 6.64 | 8.43  | 7.92  | 5.23  | 6.19 | 7.61  | 8.04  | 6.59 | 4.81 |
| 7.24 | 8.31  | 9.12  | 9.72  | 7.42 | 6.66  | 9.2   | 3.81 | 0.35 |
| 8.09 | 10.05 | 9.08  | 8.55  | 5.71 | 9.11  | 9.21  | 6.63 | 4.05 |
| 7.56 | 10.49 | 9.1   | 10.08 | 6.65 | 9.95  | 8.56  | 6.03 | 4.42 |
| 6.14 | 12.75 | 10.07 | 9.07  | 7.23 | 9.04  | 9.35  | 5.69 | 5.82 |
| 6.65 | 9.45  | 8.57  | 7.18  | 7.66 | 9.73  | 8.1   | 6.51 | 1.59 |
| 6.1  | 12.62 | 9.51  | 8.42  | 6.51 | 9.21  | 9.42  | 7.68 | 6.51 |
| 7.7  | 10.61 | 8.71  | 8.64  | 7.68 | 10.39 | 8.35  | 7.33 | 4.45 |
| 7.27 | 10.68 | 8.84  | 8.38  | 7.92 | 10.25 | 8.4   | 7.98 | 7.08 |
| 5    | 8.74  | 8.74  | 5.93  | 5.73 | 7.22  | 4.38  | 4.38 | 0.68 |
| 7.17 | 9.54  | 8.87  | 6.29  | 6.83 | 7.93  | 8.58  | 6.63 | 4.89 |
| 7.03 | 9.61  | 8.97  | 6.63  | 6.8  | 7.87  | 8.33  | 5.63 | 4.36 |
| 7.16 | 8.73  | 8.5   | 6.36  | 6.11 | 7.6   | 8.47  | 6.54 | 4.58 |
| 6.44 | 10.19 | 8.55  | 7.82  | 6.3  | 8.22  | 9.68  | 6.29 | 1.57 |
| 6.97 | 9.03  | 7.85  | 6.83  | 5.43 | 7.39  | 8.48  | 6.17 | 5.53 |
| 6.51 | 8.99  | 7.69  | 7.12  | 4.64 | 7.14  | 8.82  | 6.21 | 5.51 |

<https://mc.manuscriptcentral.com/gut>

|      |       |       |      |      |      |      |      |      |
|------|-------|-------|------|------|------|------|------|------|
| 6.11 | 10.66 | 8.6   | 6.81 | 5.49 | 7.95 | 9.85 | 3.96 | 7.9  |
| 7.54 | 9.71  | 7.88  | 6.05 | 4.8  | 8.24 | 8.81 | 6.91 | 3.68 |
| 6.65 | 8.92  | 7.29  | 4.05 | 5.11 | 8.06 | 7.35 | 6.26 | 0.59 |
| 6.6  | 9.08  | 7.42  | 4.57 | 4.66 | 8.16 | 6.86 | 6.77 | 1.49 |
| 5.72 | 10    | 7.74  | 2.55 | 3.14 | 4.55 | 8.6  | 7.39 | 5.55 |
| 6.42 | 9.06  | 8.42  | 8.59 | 6.44 | 8.43 | 8.6  | 5.29 | 1.89 |
| 5.64 | 8.83  | 7.78  | 7.26 | 4.95 | 7.89 | 6.73 | 4.49 | 4.02 |
| 5.26 | 8.92  | 7.72  | 7.22 | 4.05 | 7.75 | 6.51 | 4.11 | 3.35 |
| 6.99 | 3.08  | 8.27  | 0.27 | 0.27 | 0.27 | 7.97 | 7.64 | 3.08 |
| 7.2  | 8.38  | 8.08  | 6.92 | 5.23 | 7    | 8.34 | 7.29 | 4.17 |
| 7.17 | 8.71  | 8.68  | 9.39 | 6.37 | 9.51 | 7.73 | 5.65 | 2.82 |
| 7.25 | 8.99  | 8.14  | 8.13 | 5.41 | 9.28 | 7.56 | 6.62 | 5.14 |
| 7.04 | 9.29  | 8.44  | 8.3  | 5.97 | 9.03 | 8.67 | 5.21 | 5.97 |
| 7.41 | 8.6   | 8.51  | 8.53 | 5.52 | 8.91 | 8.95 | 6.35 | 4.45 |
| 4.13 | 14.69 | 10.07 | 6.24 | 6.24 | 9.94 | 10.7 | 3.54 | 4.87 |
| 7.04 | 10.1  | 8.8   | 6.74 | 6.43 | 8.36 | 7.17 | 5.35 | 2.97 |
| 7.07 | 9.15  | 8     | 6.73 | 5.4  | 8.11 | 8.41 | 5.64 | 3.63 |
| 7.03 | 10.44 | 8.96  | 6.45 | 6.37 | 8.32 | 7.44 | 5.59 | 2.92 |

1  
2  
3  
4  
5  
6  
7  
8  
9  
10  
11  
12  
13  
14  
15  
16  
17  
18  
19  
20  
21  
22  
23  
24  
25  
26  
27  
28  
29  
30  
31  
32  
33  
34  
35  
36  
37  
38  
39  
40  
41  
42  
43  
44  
45  
46  
47  
48  
49  
50  
51  
52  
53  
54  
55  
56  
57  
58  
59  
60

| ADAP1 | ADD1 | ADM2 | ADRA2B | AEBP1 | AGGF1 | AGR2  | AGRN  | AGT  |
|-------|------|------|--------|-------|-------|-------|-------|------|
| 7.46  | 7.87 | 7.51 | 4.51   | 9.74  | 6.47  | 9.43  | 8.37  | 4.42 |
| 8.88  | 8.33 | 7.59 | 3.92   | 9.34  | 5.96  | 12.8  | 9.65  | 7.28 |
| 8.47  | 7.96 | 7.47 | 4.47   | 9.04  | 6.15  | 11.87 | 9.69  | 6.46 |
| 9.1   | 8.59 | 7.59 | 3.64   | 11.2  | 6.37  | 11.41 | 10.54 | 8.49 |
| 7.89  | 2.01 | 7.85 | 6.1    | 8.15  | 6.33  | 7.44  | 10.1  | 3.82 |
| 8.37  | 7.79 | 6.55 | 4.3    | 10.62 | 5.44  | 13.08 | 9.05  | 6.16 |
| 8.37  | 7.83 | 6.83 | 4.56   | 10.17 | 5.85  | 13.42 | 9.22  | 6.55 |
| 9.76  | 7.7  | 7.02 | 2.39   | 11.41 | 5.98  | 13.05 | 11.56 | 7.15 |
| 8.77  | 8.14 | 6.94 | 1.95   | 11.56 | 6.94  | 11.96 | 10.89 | 7.45 |
| 8.17  | 7.91 | 6.27 | 4.3    | 10.17 | 5.89  | 12.67 | 10.79 | 6.55 |
| 8.77  | 8.52 | 6.61 | 2.38   | 10.3  | 6.51  | 13.53 | 10.74 | 6.81 |
| 8.3   | 8.72 | 5.73 | 2.27   | 10.98 | 6.11  | 12.45 | 11.22 | 7.14 |
| 9.01  | 8.65 | 7.14 | 4.09   | 9.81  | 6.72  | 13.31 | 8.45  | 6.87 |
| 9.04  | 8.57 | 7.58 | 4.26   | 11.25 | 6.74  | 12.83 | 8.88  | 6.66 |
| 10.63 | 6.77 | 8.59 | 4.77   | 11.24 | 7.52  | 9.4   | 11.44 | 5.94 |
| 7.97  | 8.34 | 7.09 | 5.03   | 10.9  | 6.15  | 9.84  | 9.8   | 4.64 |
| 8.74  | 8.64 | 7.04 | 4.99   | 10.81 | 6.84  | 10.7  | 10.36 | 6.15 |
| 8.72  | 8.25 | 6.43 | 4.93   | 11.58 | 6.81  | 9.89  | 10.14 | 4.46 |
| 9.24  | 8.52 | 6.41 | 3.36   | 10.63 | 7.36  | 10.34 | 10.55 | 4.29 |
| 8.75  | 9.29 | 7.1  | 2.63   | 10.64 | 6.98  | 12.44 | 9.88  | 6.22 |
| 8.41  | 9.13 | 6.52 | 2.96   | 10.72 | 6.71  | 10.91 | 9.75  | 4.86 |
| 8.83  | 8.95 | 8.02 | 3.15   | 11.07 | 5.7   | 13.37 | 10.62 | 9.55 |
| 8.67  | 8.86 | 7.91 | 3.66   | 10.8  | 5.98  | 13.17 | 10.77 | 9.35 |
| 8.9   | 9.2  | 8.09 | 2.48   | 11.31 | 6     | 13.31 | 10.64 | 7.52 |
| 7.59  | 8.58 | 6.51 | 4.13   | 10.14 | 5.67  | 2.43  | 10.53 | 7.14 |
| 9.55  | 8.5  | 6.11 | 2.13   | 8.05  | 6.4   | 13.98 | 9.83  | 6.22 |
| 9.59  | 8.59 | 6.5  | 2.11   | 8.2   | 6.33  | 13.81 | 9.8   | 5.84 |
| 9.05  | 8.29 | 7.02 | 4.5    | 8.71  | 6.16  | 12.91 | 9.35  | 6.11 |
| 8.78  | 7.92 | 7.1  | 3.95   | 9.15  | 5.83  | 10.16 | 9.68  | 4.16 |
| 8.68  | 7.72 | 7.58 | 4.68   | 9.6   | 6.11  | 11.78 | 10.59 | 6.98 |
| 8.85  | 8.1  | 7.55 | 4.1    | 9.08  | 5.62  | 11.47 | 10.44 | 5.81 |
| 8.83  | 6.99 | 7.42 | 5.29   | 9.76  | 6.57  | 10.32 | 10.37 | 5.92 |
| 6.88  | 8.56 | 7.29 | 4.43   | 8.49  | 6.64  | 5.1   | 7.52  | 2.52 |
| 8.7   | 9.13 | 6.31 | 2.64   | 11.25 | 6.29  | 10.79 | 9.89  | 8.09 |
| 9.25  | 9.03 | 6.15 | 2.78   | 10.46 | 6.2   | 12.56 | 10.14 | 7.72 |
| 8.99  | 8.84 | 6.4  | 3.06   | 10.97 | 6.68  | 11.56 | 10.33 | 8.05 |
| 6.79  | 7.73 | 6.03 | 2.45   | 9.58  | 6.73  | 7.49  | 9.74  | 2.45 |
| 6.97  | 8.2  | 6.16 | 2.57   | 9.5   | 6.42  | 11.46 | 9.17  | 3.49 |
| 6.95  | 8.03 | 5.5  | 3.17   | 10.08 | 6.59  | 6.91  | 9.25  | 2.69 |
| 6.63  | 8.3  | 5.93 | 0.74   | 9.53  | 6.19  | 9.38  | 8.8   | 3.07 |
| 7.47  | 7.1  | 6.71 | 4.56   | 9.94  | 5.58  | 10.88 | 8.96  | 2.68 |
| 7.48  | 7.26 | 6.76 | 5.22   | 10.4  | 4.98  | 11.67 | 8.94  | 4.29 |
| 7.54  | 7.18 | 6.88 | 4.86   | 9.78  | 5.26  | 11.12 | 8.85  | 4.22 |
| 8.28  | 7.76 | 6.21 | 3.98   | 10.6  | 4.86  | 11.92 | 9.47  | 4.72 |
| 9.8   | 6.03 | 7.11 | 6.18   | 9.16  | 6.77  | 6.32  | 13.73 | 9.5  |
| 8.29  | 8.84 | 5.84 | 3.9    | 9.79  | 5.84  | 13.85 | 8.31  | 6.87 |
| 8.27  | 9.01 | 6.02 | 3.17   | 10.48 | 5.58  | 13.63 | 8.36  | 7.82 |
| 7.94  | 9.12 | 5.13 | 2.39   | 11.19 | 5.59  | 12.91 | 8.32  | 6.74 |
| 9.6   | 9.3  | 7.58 | 2.63   | 11.62 | 6.8   | 8.93  | 10.58 | 6.7  |
| 8.88  | 9.58 | 7.35 | 3.18   | 11.77 | 6.56  | 8.75  | 10.31 | 4.4  |
| 8.97  | 9.63 | 7.18 | 3.3    | 10.49 | 6.58  | 9.39  | 10.2  | 4.67 |

<https://mc.manuscriptcentral.com/gut>

1  
2  
3  
4  
5  
6  
7  
8  
9  
10  
11  
12  
13  
14  
15  
16  
17  
18  
19  
20  
21  
22  
23  
24  
25  
26  
27  
28  
29  
30  
31  
32  
33  
34  
35  
36  
37  
38  
39  
40  
41  
42  
43  
44  
45  
46  
47  
48  
49  
50  
51  
52  
53  
54  
55  
56  
57  
58  
59  
60

|       |      |      |      |       |      |       |       |      |
|-------|------|------|------|-------|------|-------|-------|------|
| 8.73  | 9.55 | 7.15 | 2.4  | 12.02 | 6.5  | 8.54  | 10.01 | 5.08 |
| 8.87  | 8.54 | 6.85 | 3.94 | 10.21 | 6.42 | 10.87 | 9.73  | 5.49 |
| 8.74  | 8.89 | 6.98 | 4.36 | 9.9   | 6.36 | 10.18 | 9.52  | 7.62 |
| 8.82  | 9.03 | 6.88 | 4.35 | 9.92  | 6.61 | 10.27 | 9.13  | 7.28 |
| 8.59  | 8.85 | 6.8  | 4.61 | 9.65  | 6.46 | 10.31 | 9.31  | 6.54 |
| 8.94  | 9.03 | 6.97 | 4.04 | 10.31 | 6.87 | 12.89 | 9.99  | 4.32 |
| 9.95  | 9.14 | 6.2  | 2.83 | 9.95  | 6.8  | 12.85 | 10.2  | 6.86 |
| 10.29 | 9.25 | 6.32 | 2.46 | 8.88  | 6.8  | 13.57 | 10.03 | 5.74 |
| 9.95  | 9.35 | 6.11 | 3.25 | 10.74 | 6.86 | 12.35 | 10.23 | 7.19 |
| 8.87  | 9.19 | 6.31 | 2.75 | 8.97  | 7.18 | 11.88 | 8.83  | 5.44 |
| 9.13  | 9.23 | 6.5  | 3.13 | 9.66  | 6.61 | 13.42 | 9.4   | 6.88 |
| 9.16  | 9.21 | 6.17 | 2.14 | 9.36  | 6.76 | 12.94 | 9.02  | 6.57 |
| 8.98  | 9.22 | 6.49 | 2.79 | 9.85  | 6.75 | 12.58 | 9.08  | 7.15 |
| 8.32  | 8.15 | 5.15 | 5.15 | 7.47  | 8.15 | 8.74  | 15.64 | 6.74 |
| 9.16  | 6.54 | 6.28 | 5.43 | 9.98  | 7.16 | 8.24  | 12.16 | 5.18 |
| 8.24  | 7.14 | 6.37 | 5.3  | 10.1  | 6.69 | 8.92  | 10.58 | 4.92 |
| 9.37  | 2.83 | 7.86 | 6.86 | 9.01  | 7.9  | 6.8   | 9.51  | 4.05 |
| 9.42  | 3.1  | 7.97 | 7.28 | 9.14  | 7.73 | 6.86  | 10.58 | 3.36 |
| 9.47  | 8.2  | 6.16 | 3.84 | 8.69  | 6.29 | 11.49 | 9.81  | 6.02 |
| 9.62  | 8.43 | 6.41 | 4.12 | 8.03  | 6.69 | 12.06 | 9.63  | 5.69 |
| 9.43  | 7.98 | 6.57 | 3.84 | 9.15  | 6.49 | 11.2  | 9.79  | 5.45 |
| 9.32  | 9.08 | 6.46 | 2.8  | 10.93 | 6.63 | 14.16 | 9.59  | 9.08 |
| 9.34  | 9.1  | 5.98 | 3.86 | 10.51 | 6.69 | 14.09 | 9.55  | 8.26 |
| 8.57  | 8.88 | 6.91 | 4.63 | 10.16 | 6.41 | 13.38 | 8.22  | 7.76 |
| 7.97  | 9.49 | 7.39 | 4.22 | 10.56 | 6.99 | 14.57 | 9.44  | 5.92 |
| 7.87  | 9.65 | 6.82 | 4.68 | 11.8  | 6.52 | 13.57 | 9.82  | 6.15 |
| 7.5   | 9.76 | 6.71 | 3.86 | 12.59 | 6.73 | 12.37 | 9.72  | 5.33 |
| 7.88  | 8.62 | 7.06 | 3.82 | 10.06 | 6.7  | 11.83 | 8.85  | 7.14 |
| 7.85  | 8.31 | 6.73 | 3.79 | 10.08 | 6.32 | 10.72 | 8.9   | 6.53 |
| 7.47  | 8.46 | 6.77 | 4.85 | 9.98  | 6.64 | 10.45 | 8.95  | 7    |
| 8.64  | 8.83 | 7.29 | 4.64 | 10.3  | 6.69 | 10.59 | 9.88  | 7.34 |
| 8.84  | 8.6  | 7.41 | 4.52 | 9.61  | 7.09 | 11.57 | 10.13 | 7.79 |
| 8.94  | 8.22 | 7.62 | 5.51 | 9.45  | 6.87 | 11.22 | 10.26 | 7.06 |
| 8.06  | 8.24 | 7.37 | 4.64 | 10.82 | 6.55 | 10.61 | 10    | 6.27 |
| 8.37  | 8.06 | 7.35 | 5.01 | 10.74 | 6.74 | 12.63 | 9.84  | 6.69 |
| 8.14  | 8.01 | 6.97 | 4.38 | 11.56 | 6.93 | 9.6   | 10.29 | 5.48 |
| 7.33  | 8.21 | 7.39 | 4.9  | 10.67 | 6.46 | 9.46  | 9.16  | 4.61 |
| 7.33  | 8.21 | 7.39 | 4.9  | 10.67 | 6.46 | 9.46  | 9.16  | 4.61 |
| 8.11  | 7.86 | 6.66 | 4.85 | 10.52 | 6.28 | 11.38 | 10.09 | 5.7  |
| 7.82  | 7.98 | 6.97 | 4.88 | 10.53 | 6.57 | 11.06 | 9.55  | 6.37 |
| 7.4   | 8.29 | 6.34 | 4.86 | 12.12 | 6.45 | 10.05 | 9.92  | 5.77 |
| 7.03  | 6.88 | 7.64 | 5.36 | 8.49  | 6.73 | 10.8  | 7.84  | 4.14 |
| 8.08  | 7.98 | 7.01 | 4.82 | 10.08 | 6.47 | 12.42 | 9.32  | 8.4  |
| 8.74  | 8.22 | 7.14 | 4.76 | 9.27  | 6.32 | 13.18 | 9.02  | 8    |
| 7.8   | 7.63 | 7.12 | 5.42 | 9.43  | 6.47 | 11.32 | 9.04  | 7.3  |
| 9.64  | 8.61 | 6.3  | 2.31 | 10.75 | 7.49 | 12    | 10.08 | 7.08 |
| 9.98  | 8.45 | 6.36 | 2.08 | 9.49  | 6.91 | 12.12 | 10.42 | 7.43 |
| 10.01 | 8.15 | 6.35 | 3.1  | 10.41 | 7.38 | 11.29 | 11.08 | 7.01 |
| 7.06  | 7.63 | 7.45 | 5.55 | 9.28  | 6.28 | 9.55  | 7.69  | 2.15 |
| 7.16  | 7.77 | 7.45 | 5.14 | 11    | 6.42 | 9.94  | 8.62  | 7.55 |
| 7.39  | 7.74 | 7.53 | 5.04 | 10.72 | 6.18 | 9.43  | 8.29  | 7.79 |
| 8.59  | 7.53 | 6.92 | 4.64 | 10.13 | 5.4  | 11.26 | 9.2   | 4.98 |

<https://mc.manuscriptcentral.com/gut>

|    |       |      |      |      |       |      |       |       |      |
|----|-------|------|------|------|-------|------|-------|-------|------|
| 1  |       |      |      |      |       |      |       |       |      |
| 2  | 8.36  | 7.9  | 6.87 | 4.8  | 10.52 | 5.53 | 11.65 | 9.23  | 5.35 |
| 3  | 8.6   | 5.56 | 6.68 | 5.45 | 10.49 | 5.97 | 8.37  | 10.7  | 6.01 |
| 4  | 8.31  | 8.84 | 6.37 | 4.15 | 10.68 | 6.53 | 12.22 | 9.48  | 4.89 |
| 5  | 8.12  | 9.36 | 6.03 | 3.08 | 11.3  | 6.12 | 12.93 | 10.28 | 8.03 |
| 6  | 8.13  | 9.47 | 6.37 | 1.49 | 12.65 | 6.22 | 12.32 | 10.44 | 7.1  |
| 7  | 8.22  | 8.19 | 5.8  | 2.99 | 11.37 | 6.82 | 11.89 | 9.93  | 6.08 |
| 8  | 7.75  | 8.87 | 5.87 | 2.36 | 10.71 | 6.47 | 14.96 | 10.36 | 7.38 |
| 9  | 7.95  | 8.9  | 5.22 | 2.34 | 10.98 | 6.47 | 14.23 | 10.24 | 7.57 |
| 10 | 9.46  | 6.89 | 5.66 | 4.08 | 11.3  | 8.05 | 11.95 | 13.8  | 8.45 |
| 11 | 9.86  | 8.23 | 5.44 | 1.79 | 10.61 | 6.88 | 12.29 | 11.14 | 4.88 |
| 12 | 9.34  | 8.56 | 5.58 | 0.49 | 9.89  | 6.4  | 12.88 | 10.4  | 6.49 |
| 13 | 8.39  | 8.15 | 5.67 | 4.06 | 9.33  | 5.7  | 12.69 | 9.41  | 5.1  |
| 14 | 10.33 | 7.02 | 6.51 | 4.26 | 12.27 | 7.93 | 10.86 | 13.74 | 6.65 |
| 15 | 8.47  | 0.79 | 7.91 | 6.92 | 9     | 6.56 | 8.24  | 8.94  | 2.37 |
| 16 | 9.21  | 7.5  | 6.14 | 3.41 | 9.85  | 5.53 | 9.7   | 8.95  | 7.85 |
| 17 | 9.31  | 7.66 | 6.72 | 3    | 9.66  | 5.12 | 10.37 | 8.59  | 7.97 |
| 18 | 9.18  | 7.82 | 6.6  | 1.52 | 9.69  | 5.33 | 10.73 | 8.7   | 7.98 |
| 19 | 9.07  | 8.86 | 5.27 | 2.6  | 10.69 | 6.24 | 11.11 | 9.98  | 5.48 |
| 20 | 8.36  | 8    | 5.9  | 4.26 | 10.85 | 5.83 | 7.83  | 9.94  | 3.47 |
| 21 | 8.54  | 8.35 | 5.48 | 2.85 | 10.91 | 6.2  | 7.06  | 10.06 | 3.1  |
| 22 | 11.78 | 6.16 | 7.49 | 5.16 | 8.33  | 8.16 | 7.16  | 16.51 | 5.16 |
| 23 | 8.91  | 9.65 | 6.58 | 2.13 | 8.57  | 5.75 | 13.7  | 10.03 | 6.35 |
| 24 | 8.7   | 9.21 | 6.15 | 2.54 | 9.83  | 6.56 | 13.02 | 9.97  | 6.39 |
| 25 | 8.97  | 7.61 | 6.67 | 4.18 | 11.27 | 6.7  | 11.04 | 11.29 | 7.06 |
| 26 | 9.19  | 7.43 | 6.97 | 3.49 | 11.33 | 7.02 | 10.7  | 12.12 | 7.84 |
| 27 | 7.97  | 8.57 | 6.45 | 3.13 | 12.57 | 6.3  | 9.89  | 10.53 | 6.71 |
| 28 | 7.52  | 3    | 8.51 | 6    | 8.56  | 6.52 | 8.13  | 8.97  | 5    |
| 29 | 7.33  | 3.18 | 8.24 | 6.11 | 8.32  | 6.81 | 7.98  | 8.47  | 1.86 |
| 30 | 7.02  | 1.77 | 7.79 | 6.23 | 7.74  | 6.67 | 7.47  | 7.7   | 1.77 |
| 31 | 6.22  | 8.62 | 5.92 | 1.59 | 10.96 | 5.33 | 10.53 | 9.21  | 5.62 |
| 32 | 5.98  | 8.53 | 5.66 | 1.91 | 11.43 | 5.11 | 9.75  | 8.7   | 6.5  |
| 33 | 6.45  | 7.92 | 6.41 | 2.92 | 10.55 | 5.32 | 11.62 | 9.37  | 7.27 |
| 34 | 5.74  | 8.76 | 5.71 | 2.74 | 11.67 | 5.33 | 9.65  | 8.48  | 6.09 |
| 35 | 7.17  | 2.77 | 6.93 | 5.54 | 7.62  | 5.91 | 7.11  | 9.03  | 0.45 |
| 36 | 7.36  | 3.42 | 7.03 | 4.78 | 7.15  | 4.9  | 7.73  | 8.78  | 3.25 |
| 37 | 7.98  | 4.34 | 6.76 | 4.84 | 7.46  | 5.79 | 7.87  | 9.05  | 2.67 |
| 38 | 7.54  | 0    | 6.46 | 5.57 | 7.88  | 6.06 | 6.49  | 7.74  | 1.91 |
| 39 | 6.04  | 2.34 | 7.48 | 4.51 | 7.62  | 6.04 | 6.62  | 7.62  | 2.34 |
| 40 | 6.23  | 2.1  | 7.25 | 4.9  | 7.56  | 5.1  | 7.29  | 8.26  | 3.9  |
| 41 | 6.29  | 2.63 | 7.05 | 5.22 | 7.3   | 5.56 | 7.36  | 8.42  | 3.77 |
| 42 | 8.39  | 2.41 | 5.41 | 5.22 | 6.66  | 6.41 | 4     | 8.98  | 2.41 |
| 43 | 6.84  | 2.64 | 8.43 | 6.34 | 8.28  | 7.06 | 8.27  | 8.51  | 2.64 |
| 44 | 7.32  | 2.33 | 8.63 | 6.35 | 8.27  | 7.21 | 8.27  | 8.45  | 0.91 |
| 45 | 7.95  | 5.67 | 7.42 | 5.51 | 7.82  | 6.45 | 11.18 | 9.85  | 6    |
| 46 | 7.45  | 3.33 | 7.89 | 5.7  | 7.88  | 6.52 | 8.32  | 9.35  | 3.84 |
| 47 | 7.79  | 5.9  | 7.62 | 5.37 | 9.43  | 6.19 | 10.75 | 9.65  | 5.76 |
| 48 | 7.92  | 3.1  | 8.49 | 6    | 8.64  | 6.2  | 8.33  | 9.95  | 5.38 |
| 49 | 7.23  | 3.29 | 8.19 | 5.79 | 8.08  | 6.23 | 8.15  | 7.83  | 2.71 |
| 50 | 8     | 1.48 | 7.65 | 5.78 | 8.59  | 6.41 | 7.86  | 9.47  | 5.9  |
| 51 | 6.42  | 8.01 | 6.43 | 3.72 | 9.52  | 5.87 | 10.61 | 8.96  | 4.77 |
| 52 | 6.83  | 7.87 | 6.77 | 4.65 | 9.84  | 5.68 | 11.88 | 9.08  | 5.07 |
| 53 | 6.84  | 7.88 | 6.98 | 4.89 | 9.46  | 5.68 | 11.85 | 9.04  | 5.5  |

<https://mc.manuscriptcentral.com/gut>

1  
2  
3  
4  
5  
6  
7  
8  
9  
10  
11  
12  
13  
14  
15  
16  
17  
18  
19  
20  
21  
22  
23  
24  
25  
26  
27  
28  
29  
30  
31  
32  
33  
34  
35  
36  
37  
38  
39  
40  
41  
42  
43  
44  
45  
46  
47  
48  
49  
50  
51  
52  
53  
54  
55  
56  
57  
58  
59  
60

|       |      |      |      |       |      |       |       |      |
|-------|------|------|------|-------|------|-------|-------|------|
| 7.06  | 7.79 | 6.96 | 4.52 | 9.83  | 5.91 | 11.55 | 8.82  | 4.97 |
| 7.75  | 9.27 | 7.55 | 3.84 | 11.45 | 6.67 | 12.64 | 10.83 | 4.84 |
| 7.79  | 9.15 | 7.5  | 4.56 | 10.84 | 6.91 | 13.7  | 10.66 | 6.94 |
| 7.56  | 9.12 | 7.34 | 5.2  | 9.46  | 5.95 | 12.17 | 10.53 | 1.74 |
| 7.83  | 9.19 | 6.95 | 4.6  | 9.51  | 6.18 | 12.07 | 10.53 | 2.54 |
| 8.85  | 8.67 | 7.67 | 4.85 | 11.07 | 6.74 | 12.31 | 10.9  | 7.22 |
| 10.37 | 8.62 | 7.3  | 3.65 | 11.1  | 6.99 | 14.09 | 11.83 | 8.32 |
| 10.01 | 8.89 | 7    | 3.3  | 10.74 | 6.26 | 14.8  | 11.38 | 7.73 |
| 9.79  | 8.44 | 6.36 | 3.91 | 11.31 | 7.34 | 13.28 | 11.81 | 7.05 |
| 10.55 | 9.28 | 7.98 | 3.93 | 11.33 | 6.65 | 12.47 | 11.32 | 5.76 |
| 9.72  | 9.23 | 7.66 | 4.41 | 11.52 | 6.43 | 12.62 | 10.38 | 6.88 |
| 9.83  | 9.25 | 7.67 | 4.38 | 11.64 | 6.59 | 12.11 | 10.39 | 7.28 |
| 10.37 | 9.07 | 7.57 | 4.59 | 10.83 | 6.21 | 13.14 | 10.5  | 6.75 |
| 8.01  | 8.55 | 7.16 | 4.06 | 10.21 | 6.34 | 11.23 | 9.47  | 4.48 |
| 8.47  | 8.89 | 6.83 | 3.42 | 10.13 | 6.2  | 12.47 | 10.04 | 7.67 |
| 8.08  | 8.06 | 6.59 | 4.47 | 11.12 | 6.49 | 9.68  | 10.28 | 7.75 |
| 7.06  | 9.08 | 6.34 | 2.32 | 10.76 | 6.8  | 10.82 | 8.76  | 6.12 |
| 7.82  | 8.63 | 5.31 | 0.67 | 11.21 | 6.55 | 13.57 | 9.47  | 7.92 |
| 7.45  | 8.87 | 5.27 | 2.52 | 11.41 | 6.54 | 11.55 | 9.85  | 6.16 |
| 8.32  | 9.06 | 6.32 | 2.25 | 11.12 | 6.36 | 13.84 | 9.75  | 5.48 |
| 8.13  | 8.6  | 6.67 | 2.13 | 11.67 | 6.05 | 9.85  | 8.66  | 7.86 |
| 8.73  | 8.26 | 6.18 | 0    | 9.88  | 6.25 | 9.6   | 8.5   | 7.19 |
| 8.06  | 8.13 | 8.23 | 4.43 | 10.54 | 6.43 | 11.49 | 10.25 | 6.69 |
| 8.39  | 8.75 | 8.23 | 4.84 | 10.7  | 5.57 | 11.45 | 10.41 | 5.97 |
| 10.4  | 7.24 | 8.36 | 5.74 | 11.51 | 7.47 | 9.06  | 13.17 | 6.85 |
| 7.14  | 7.8  | 5.57 | 0.36 | 9.24  | 5.61 | 10.44 | 7.85  | 2.36 |
| 6.86  | 8    | 5.6  | 2.79 | 9.29  | 4.6  | 11.51 | 7.94  | 7.36 |
| 7.67  | 7.9  | 5.38 | 2.57 | 9.06  | 5.46 | 9.13  | 8.32  | 7.97 |
| 7.83  | 9.05 | 4.48 | 1.9  | 9.29  | 5.81 | 10.01 | 6.85  | 8.47 |
| 5.76  | 1.76 | 7.71 | 4.57 | 7.04  | 5.57 | 6.71  | 7.4   | 2.76 |
| 6.42  | 4.04 | 7.51 | 5.3  | 7.97  | 5.58 | 8.58  | 8.69  | 3.53 |
| 6.38  | 3.69 | 7.57 | 5.28 | 7.28  | 5.93 | 7.13  | 7.42  | 1.88 |
| 5.81  | 2.96 | 7.46 | 5.35 | 7.54  | 5.48 | 6.66  | 7.48  | 2.54 |
| 7.34  | 6.49 | 6.65 | 3.75 | 8.63  | 5.38 | 10.54 | 8.42  | 1.68 |
| 7.2   | 6.3  | 6.68 | 3.75 | 8.86  | 5.81 | 9.69  | 7.52  | 4.12 |
| 6.95  | 6.64 | 6.62 | 4.01 | 9.68  | 5.38 | 7.95  | 7.56  | 6.12 |
| 6.76  | 6.96 | 6.38 | 3.87 | 10.36 | 5.23 | 7.35  | 7.91  | 5.64 |
| 5.97  | 9.33 | 6.64 | 2.68 | 9.01  | 6.69 | 0.35  | 6.48  | 4.05 |
| 9.39  | 8.73 | 7.02 | 4.05 | 10.67 | 6.27 | 12.08 | 9.82  | 8.42 |
| 8.83  | 8.4  | 5.94 | 2.42 | 9.3   | 6.99 | 13.35 | 10.34 | 7.6  |
| 10.26 | 5.82 | 5.23 | 4.23 | 9.95  | 8.38 | 10.9  | 12.72 | 6.88 |
| 8.2   | 8.79 | 7.16 | 4.26 | 10.48 | 6.3  | 12.09 | 9.02  | 3.88 |
| 9.15  | 6.51 | 6.1  | 4.51 | 10.03 | 8.21 | 10.44 | 12.66 | 7.51 |
| 7.94  | 9.04 | 6.19 | 3.33 | 11.22 | 6.21 | 13.12 | 9.6   | 6.45 |
| 7.12  | 9.15 | 5.79 | 3.26 | 12.23 | 5.49 | 11.56 | 10    | 5.84 |
| 8.91  | 8.72 | 5.81 | 3.27 | 5.21  | 5.54 | 8.99  | 9.82  | 9.91 |
| 8.89  | 8.23 | 5.98 | 4.89 | 9.5   | 5.79 | 7.75  | 9.76  | 9.36 |
| 8.75  | 8.49 | 5.28 | 3.98 | 9.55  | 6.03 | 8.6   | 9.46  | 9.05 |
| 8.19  | 8.28 | 6.5  | 4.34 | 9.29  | 5.98 | 8.24  | 9.02  | 8.35 |
| 8.12  | 8.36 | 5.7  | 0.57 | 10.14 | 5.68 | 11.82 | 9.47  | 2.16 |
| 6.97  | 8.11 | 6.43 | 3.7  | 10.84 | 5.43 | 11.04 | 8.59  | 7.37 |
| 7.28  | 7.71 | 6.54 | 4.08 | 10.67 | 5.64 | 10.63 | 8.76  | 7.21 |

<https://mc.manuscriptcentral.com/gut>

1  
2  
3  
4  
5  
6  
7  
8  
9  
10  
11  
12  
13  
14  
15  
16  
17  
18  
19  
20  
21  
22  
23  
24  
25  
26  
27  
28  
29  
30  
31  
32  
33  
34  
35  
36  
37  
38  
39  
40  
41  
42  
43  
44  
45  
46  
47  
48  
49  
50  
51  
52  
53  
54  
55  
56  
57  
58  
59  
60

|       |      |      |      |       |      |       |       |      |
|-------|------|------|------|-------|------|-------|-------|------|
| 8.19  | 7.95 | 6.11 | 2.79 | 10.3  | 5.96 | 10.57 | 9.91  | 7.34 |
| 8.11  | 7.96 | 6.31 | 3.68 | 11.33 | 5.27 | 9.06  | 9.96  | 7.58 |
| 8.29  | 7.41 | 5.98 | 2.91 | 9.4   | 5.11 | 10.83 | 9.61  | 8.78 |
| 8.6   | 7.67 | 6.42 | 2.49 | 9.52  | 4.07 | 11.15 | 9.9   | 8.89 |
| 8.25  | 3.55 | 7.8  | 5.14 | 8.59  | 6.08 | 6.91  | 10.86 | 7.11 |
| 8.38  | 8.35 | 4.32 | 1.89 | 10.02 | 5.92 | 12.59 | 8.38  | 3.81 |
| 8.71  | 7.81 | 3.93 | 1.39 | 7.69  | 5.81 | 12.8  | 8.37  | 5.13 |
| 8.83  | 7.82 | 3.88 | 0.35 | 7.36  | 5.74 | 13.01 | 8.61  | 4.74 |
| 6.86  | 2.59 | 7.72 | 5.97 | 8     | 6.08 | 7.36  | 7.5   | 1.27 |
| 6.97  | 6.85 | 6.91 | 4.28 | 9.31  | 6.08 | 10.83 | 7.95  | 7.31 |
| 7.95  | 8.94 | 5.74 | 2.24 | 10.83 | 6.39 | 9.66  | 8.31  | 4.24 |
| 8.15  | 8.51 | 6.98 | 3.47 | 10.69 | 6.35 | 11.9  | 8.39  | 7.26 |
| 8.35  | 8.42 | 6.95 | 1.3  | 10.72 | 6.59 | 11.62 | 8.77  | 6.96 |
| 7.93  | 8.97 | 6.15 | 3.45 | 11.71 | 6.01 | 10.31 | 8.11  | 5.52 |
| 11.94 | 5.13 | 6.87 | 4.54 | 10.05 | 8.1  | 11.64 | 12.75 | 6.35 |
| 7.57  | 8.27 | 5.35 | 2.61 | 9.2   | 6.09 | 9.24  | 8.83  | 5.39 |
| 7.27  | 7.86 | 6.14 | 3.82 | 8.63  | 5.73 | 12.48 | 7.6   | 5.14 |
| 7.55  | 7.88 | 5.71 | 2.92 | 9.12  | 6.41 | 8.74  | 9.21  | 5.59 |

1  
2  
3  
4  
5  
6  
7  
8  
9  
10  
11  
12  
13  
14  
15  
16  
17  
18  
19  
20  
21  
22  
23  
24  
25  
26  
27  
28  
29  
30  
31  
32  
33  
34  
35  
36  
37  
38  
39  
40  
41  
42  
43  
44  
45  
46  
47  
48  
49  
50  
51  
52  
53  
54  
55  
56  
57  
58  
59  
60

| AHNAK | AKAP12 | AKAP2 | AKT1  | AKT2  | AKT3 | ALB  | ALDOA | ALOX5 |
|-------|--------|-------|-------|-------|------|------|-------|-------|
| 8.96  | 7.02   | 8.02  | 9.17  | 8.6   | 7.73 | 6.36 | 10.87 | 8.78  |
| 10.59 | 7.43   | 8.26  | 9.88  | 8.78  | 7.23 | 2.42 | 11.92 | 8.24  |
| 10.83 | 6.8    | 7.76  | 9.82  | 8.7   | 7.45 | 2.4  | 11.94 | 7.97  |
| 11.65 | 8.34   | 8.48  | 10.66 | 9.44  | 7.81 | 2.5  | 12.29 | 9.25  |
| 7.59  | 8.04   | 8.36  | 6.1   | 8.45  | 7.62 | 3.33 | 8.93  | 8.01  |
| 9.39  | 7.51   | 7.9   | 10.27 | 9.52  | 7.95 | 1.81 | 12.17 | 9.59  |
| 9.41  | 7.58   | 8.02  | 10.32 | 9.51  | 7.78 | 3.83 | 12.18 | 9.72  |
| 11.03 | 7.67   | 8.09  | 11.55 | 10.49 | 7.18 | 5.75 | 13.41 | 10.9  |
| 10.15 | 7.35   | 7.97  | 10.87 | 9.73  | 7.34 | 9.02 | 12.74 | 9.96  |
| 9.11  | 6.52   | 7.23  | 9.92  | 8.72  | 7.17 | 1.91 | 13.13 | 7.94  |
| 10.11 | 6.95   | 7.52  | 10.55 | 9.35  | 7.09 | 2.38 | 13.12 | 8.59  |
| 10.41 | 8.15   | 8.08  | 10.6  | 9.42  | 7.95 | 2.68 | 13.5  | 9.33  |
| 10    | 6.92   | 7.61  | 10    | 9.34  | 7.16 | 2.18 | 11.45 | 7.52  |
| 10.16 | 7.19   | 8.11  | 10.16 | 9.34  | 7.85 | 1.67 | 11.5  | 8.04  |
| 12.16 | 6.81   | 8.23  | 11.43 | 10.66 | 6.35 | 1.77 | 12.61 | 9.59  |
| 10.23 | 8.4    | 8.3   | 10.46 | 8.68  | 8.08 | 0.94 | 12.08 | 9.75  |
| 10.86 | 8.16   | 7.59  | 10.85 | 8.77  | 7.9  | 2.87 | 12.24 | 8.78  |
| 10.96 | 8.36   | 7.91  | 10.73 | 8.82  | 7.52 | 0.76 | 12.7  | 8.72  |
| 11.36 | 7.32   | 8.71  | 11.11 | 10.33 | 7.97 | 9.58 | 11.74 | 9.85  |
| 10.67 | 7.54   | 8.69  | 10.96 | 9.93  | 8.08 | 6.97 | 12.06 | 8.6   |
| 11.03 | 8.39   | 8.76  | 10.95 | 10.05 | 8.68 | 5.94 | 11.83 | 9.08  |
| 10.96 | 8.57   | 8.7   | 10.94 | 10.68 | 8.3  | 5.36 | 12.33 | 9.33  |
| 10.94 | 8.15   | 8.73  | 10.89 | 10.77 | 8.43 | 6.84 | 12.3  | 9.13  |
| 11.01 | 9.76   | 9.03  | 10.93 | 10.57 | 8.78 | 7.03 | 12.34 | 9.34  |
| 10.42 | 6.58   | 7.07  | 10.85 | 9.49  | 6.73 | 2.75 | 12.68 | 8.33  |
| 11.61 | 6.42   | 7.56  | 11.14 | 9.74  | 6.13 | 3.45 | 12.88 | 7.49  |
| 11.33 | 5.84   | 7.25  | 10.98 | 9.63  | 5.65 | 3.11 | 12.82 | 7.66  |
| 11.08 | 6.97   | 7.81  | 10.65 | 9.04  | 6.57 | 1.5  | 11.8  | 8.32  |
| 9.02  | 6.76   | 7.63  | 10.06 | 9.31  | 7.16 | 0.7  | 12.61 | 7.86  |
| 10.01 | 7.47   | 7.89  | 9.98  | 9.33  | 7.49 | 0.77 | 11.93 | 8.38  |
| 9.57  | 6.2    | 7.56  | 10.17 | 9.32  | 7.28 | 0.2  | 12.54 | 7.75  |
| 9.87  | 6.97   | 7.75  | 9.93  | 9.29  | 7.2  | 1.71 | 11.91 | 8.37  |
| 9.23  | 8.01   | 8.89  | 9.23  | 9.2   | 8.73 | 1.35 | 10.48 | 10.06 |
| 10.5  | 8.8    | 8.44  | 11.1  | 9.74  | 8.47 | 1.64 | 12.15 | 8.69  |
| 10.28 | 7.59   | 7.98  | 11.29 | 9.59  | 7.8  | 2.78 | 12.61 | 8.01  |
| 10.59 | 8.51   | 8.16  | 11.28 | 9.95  | 8.11 | 2.79 | 12.06 | 8.36  |
| 9.5   | 6.82   | 7.87  | 10.41 | 9.36  | 6.53 | 3.9  | 12.15 | 9.24  |
| 10.51 | 5.9    | 7.39  | 10.57 | 9.06  | 6.73 | 3.49 | 12.43 | 8.59  |
| 10.23 | 6.67   | 7.75  | 10.27 | 9.11  | 6.97 | 2.37 | 11.77 | 8.19  |
| 10.29 | 7.34   | 7.66  | 10.27 | 8.98  | 7.28 | 3.55 | 11.7  | 8.63  |
| 8.43  | 7.39   | 7.36  | 12.58 | 8.17  | 7.2  | 1.1  | 10.69 | 8.29  |
| 8.72  | 7.04   | 7.44  | 13.25 | 8.34  | 7.32 | 0.9  | 11    | 7.62  |
| 8.37  | 6.69   | 7.6   | 13.08 | 8.03  | 7.27 | 2.8  | 10.53 | 7.12  |
| 8.81  | 6.24   | 7.33  | 13.76 | 8.37  | 6.69 | 0.82 | 10.97 | 7.07  |
| 9.9   | 5.67   | 6.56  | 11.52 | 9.75  | 5.18 | 6.18 | 13.57 | 8.5   |
| 10.15 | 7.42   | 7.78  | 10.07 | 8.7   | 7.27 | 1.9  | 11.89 | 8.22  |
| 10.24 | 7.69   | 7.81  | 10.11 | 8.73  | 7.88 | 2.32 | 11.97 | 7.7   |
| 10.86 | 8.57   | 8.2   | 10.19 | 9     | 8.32 | 2.13 | 11.52 | 7.82  |
| 10.74 | 8.4    | 8.54  | 11.12 | 9.88  | 7.69 | 1.63 | 13.13 | 9.7   |
| 10.18 | 7.89   | 8.13  | 10.89 | 9.68  | 7.65 | 0.01 | 13.24 | 9.24  |
| 10.14 | 7.38   | 7.99  | 10.73 | 11.44 | 7.69 | 2.82 | 13.05 | 9.16  |

<https://mc.manuscriptcentral.com/gut>



1  
2  
3  
4  
5  
6  
7  
8  
9  
10  
11  
12  
13  
14  
15  
16  
17  
18  
19  
20  
21  
22  
23  
24  
25  
26  
27  
28  
29  
30  
31  
32  
33  
34  
35  
36  
37  
38  
39  
40  
41  
42  
43  
44  
45  
46  
47  
48  
49  
50  
51  
52  
53  
54  
55  
56  
57  
58  
59  
60

|       |      |      |       |       |      |       |       |       |
|-------|------|------|-------|-------|------|-------|-------|-------|
| 10.49 | 8.62 | 8.56 | 10.99 | 10.47 | 8.34 | 2.08  | 13.2  | 9.43  |
| 9.45  | 7.1  | 7.8  | 10.95 | 10    | 6.14 | 2.03  | 12.84 | 8.95  |
| 9.43  | 6.74 | 7.87 | 10.77 | 10.03 | 6.82 | 3.19  | 12.14 | 8.06  |
| 9.27  | 7    | 7.9  | 10.86 | 9.89  | 6.51 | 0     | 12.37 | 8.36  |
| 9.85  | 7.91 | 7.78 | 10.7  | 9.93  | 7.13 | 2.55  | 12.03 | 8.22  |
| 11.21 | 8.29 | 8.37 | 10.85 | 9.25  | 8.42 | 1.23  | 12.36 | 8.55  |
| 11.24 | 9.94 | 8.2  | 11.53 | 9.64  | 7.5  | 1.83  | 12.97 | 8.18  |
| 11.41 | 5.77 | 7.12 | 11.58 | 9.28  | 6.24 | 2     | 13.12 | 6.15  |
| 11.11 | 8.46 | 7.85 | 12.04 | 10.03 | 8.02 | 4.02  | 13.27 | 7.87  |
| 9.7   | 6.15 | 7.79 | 11.19 | 9.01  | 6.38 | 3.04  | 13.89 | 8.47  |
| 10.45 | 6.95 | 8.04 | 11.13 | 9.14  | 7.21 | 2.13  | 12.95 | 8.72  |
| 9.9   | 6.12 | 7.34 | 11.22 | 8.88  | 6.65 | 0.82  | 13.19 | 8.71  |
| 10.17 | 7.6  | 7.88 | 11.2  | 9.03  | 7.34 | 2.3   | 13.04 | 8.5   |
| 9.67  | 6.74 | 5.15 | 8.74  | 9.74  | 5.15 | 5.15  | 11.06 | 6.15  |
| 10.78 | 7.11 | 7.54 | 10.32 | 10.33 | 6.31 | 0.79  | 12.52 | 8.93  |
| 9.87  | 6.93 | 7.75 | 9.39  | 9.73  | 7.1  | 1.6   | 11.81 | 8.75  |
| 8.19  | 8.5  | 8.86 | 2.24  | 9.55  | 6.72 | 1.24  | 9.45  | 8.7   |
| 8.18  | 8.28 | 8.68 | 6.02  | 9.19  | 7.2  | 1.77  | 9.61  | 8.37  |
| 9.78  | 5.69 | 7.16 | 10.52 | 9.37  | 6.51 | 1.14  | 13.29 | 6.87  |
| 10.13 | 5.85 | 7.18 | 10.43 | 9.4   | 6.14 | 1.58  | 13.68 | 6.29  |
| 9.78  | 6.37 | 7.61 | 10.36 | 9.4   | 6.59 | 1.99  | 12.93 | 7.47  |
| 11.42 | 8.52 | 8.64 | 10.91 | 9.89  | 8.18 | 1.9   | 12.56 | 10.35 |
| 11.18 | 8.5  | 8.13 | 10.55 | 9.73  | 8.33 | 1.86  | 12.18 | 9.93  |
| 11    | 8.6  | 8.73 | 9.53  | 9.02  | 8.88 | 2.63  | 11.25 | 9.14  |
| 11.44 | 7.53 | 8.69 | 11.53 | 9.97  | 7.83 | 4.54  | 13.1  | 8.88  |
| 11.02 | 8.37 | 8.72 | 11.56 | 9.84  | 8.38 | 4.04  | 13.26 | 8.39  |
| 11.16 | 8.5  | 8.5  | 11.63 | 10.2  | 8.33 | 3.28  | 13.33 | 8.2   |
| 9.23  | 6.93 | 8.12 | 10.28 | 9.7   | 7.29 | 1.36  | 11.5  | 8.22  |
| 9.03  | 7.01 | 8.07 | 10.36 | 9.76  | 7.31 | 2.79  | 11.54 | 8.12  |
| 9.02  | 7.44 | 7.81 | 10.34 | 9.62  | 7.47 | 2.74  | 11.47 | 8.26  |
| 10.11 | 8.63 | 8.39 | 10.18 | 9.28  | 8.08 | 1.7   | 11.74 | 8.46  |
| 9.89  | 6.89 | 7.98 | 10.48 | 9.49  | 7.47 | 1.2   | 12.23 | 8.24  |
| 9.57  | 6.94 | 8.01 | 10.26 | 9.39  | 7.41 | 1.99  | 11.99 | 8.94  |
| 10.49 | 8.36 | 8.08 | 10.15 | 9.14  | 7.91 | 2.05  | 12.29 | 8.48  |
| 10.5  | 7.75 | 7.84 | 10.22 | 9.1   | 7.59 | 2.2   | 12.63 | 8.89  |
| 10.55 | 8.13 | 8.52 | 10.24 | 9.3   | 8.1  | 1.51  | 12.59 | 8.6   |
| 9.86  | 8.45 | 8.32 | 9.56  | 8.92  | 8.51 | 2.76  | 11.62 | 9.48  |
| 9.86  | 8.45 | 8.32 | 9.56  | 8.92  | 8.51 | 2.76  | 11.62 | 9.48  |
| 10.59 | 7.96 | 7.95 | 10.36 | 9.24  | 7.94 | 3.47  | 12.82 | 9.58  |
| 10.68 | 8.64 | 8.43 | 10.12 | 9.07  | 8.38 | 2.5   | 12.43 | 9.39  |
| 10.64 | 8.76 | 8.25 | 10.18 | 9.31  | 8.48 | 2.27  | 12.53 | 10.01 |
| 8.8   | 7.64 | 8.44 | 9.11  | 8.81  | 8.46 | 6.28  | 10.11 | 9.17  |
| 9.93  | 7.63 | 8.27 | 10.31 | 9.31  | 8.11 | 10.32 | 11.23 | 9.7   |
| 10.32 | 7.22 | 8.14 | 10.91 | 9.29  | 7.66 | 7.61  | 11.95 | 10.39 |
| 10.29 | 7.94 | 8.23 | 10.04 | 8.94  | 8.3  | 8.56  | 11.14 | 9.17  |
| 10.69 | 7.16 | 7.98 | 10.99 | 9.53  | 7.16 | 1.73  | 13.27 | 8.49  |
| 10.71 | 5.6  | 7.4  | 11.03 | 9.28  | 6.52 | 2.4   | 13.59 | 8.38  |
| 11.21 | 6.78 | 7.64 | 11.07 | 9.71  | 6.52 | 2.1   | 13.24 | 9.46  |
| 8.97  | 8.32 | 8.24 | 8.47  | 8.42  | 8.28 | 0.15  | 10.1  | 8.68  |
| 10.26 | 8.93 | 8.38 | 9.44  | 8.9   | 8.39 | 1.6   | 11    | 8.67  |
| 10.47 | 8.84 | 8.53 | 9.39  | 8.85  | 8.49 | 0.46  | 10.98 | 8.6   |
| 9.65  | 7.19 | 8.08 | 9.29  | 8.87  | 8.1  | 3.2   | 10.87 | 8.13  |

<https://mc.manuscriptcentral.com/gut>

1  
2  
3  
4  
5  
6  
7  
8  
9  
10  
11  
12  
13  
14  
15  
16  
17  
18  
19  
20  
21  
22  
23  
24  
25  
26  
27  
28  
29  
30  
31  
32  
33  
34  
35  
36  
37  
38  
39  
40  
41  
42  
43  
44  
45  
46  
47  
48  
49  
50  
51  
52  
53  
54  
55  
56  
57  
58  
59  
60

|       |      |      |       |       |      |       |       |       |
|-------|------|------|-------|-------|------|-------|-------|-------|
| 9.84  | 7.43 | 8.12 | 9.62  | 9.23  | 8.25 | 2.7   | 11.4  | 7.86  |
| 9.94  | 7.92 | 8.42 | 9.13  | 8.95  | 7.68 | 0.78  | 10.75 | 7.91  |
| 10.11 | 8.58 | 8.56 | 10.15 | 9.87  | 8.54 | 4.05  | 11.24 | 9.45  |
| 12.05 | 8.43 | 8.31 | 10.76 | 9.9   | 8.34 | 2.88  | 12.52 | 9.3   |
| 11.55 | 9.42 | 8.66 | 10.87 | 10.06 | 8.75 | 4.49  | 11.77 | 9.45  |
| 11.17 | 7.89 | 8.33 | 10.7  | 9.41  | 7.31 | 3.73  | 12.3  | 9.4   |
| 10.54 | 6.71 | 7.28 | 11.16 | 8.74  | 7.17 | 2.13  | 13.42 | 8.05  |
| 10.62 | 7.66 | 7.5  | 11.01 | 8.83  | 7.34 | 0.76  | 13.46 | 8.36  |
| 12.76 | 6.4  | 7.58 | 12.09 | 9.9   | 5.66 | 4.49  | 13.72 | 9.58  |
| 11.13 | 7.57 | 8.03 | 11.13 | 10    | 7.1  | 4.6   | 11.47 | 10.08 |
| 10.71 | 6.42 | 7.19 | 11.5  | 9.73  | 6.44 | 3.49  | 12.58 | 8.94  |
| 9.61  | 6.2  | 7.55 | 11.07 | 8.96  | 7.12 | 0.89  | 11.83 | 8.19  |
| 12.32 | 6.65 | 7.21 | 12.28 | 10.97 | 5.85 | 3.26  | 13.15 | 9.72  |
| 7.16  | 7.66 | 9.16 | 2.01  | 9.78  | 7.84 | 0.79  | 9.36  | 9.2   |
| 9.46  | 6.56 | 7.58 | 10.23 | 10.54 | 6.84 | 2.27  | 11.77 | 9.42  |
| 9.33  | 6.1  | 7.35 | 10.33 | 10.74 | 6.49 | 1.42  | 11.9  | 9.45  |
| 9.84  | 6.89 | 7.44 | 10.22 | 10.61 | 6.66 | 1.1   | 11.82 | 9.69  |
| 10.39 | 6.7  | 7.43 | 10.81 | 9.39  | 7.89 | 2.76  | 12.33 | 8.7   |
| 9.81  | 6.98 | 7.44 | 10.11 | 8.8   | 6.99 | 0.77  | 11.89 | 8.32  |
| 10.14 | 7.38 | 7.82 | 10.48 | 9.07  | 7.61 | 2.2   | 12.29 | 9.13  |
| 12.52 | 5.16 | 5.16 | 11.19 | 10.21 | 7.16 | 10.07 | 11.82 | 7.97  |
| 10.38 | 6.67 | 7.39 | 9.79  | 9.78  | 7.71 | 4.53  | 12.67 | 10.19 |
| 10.38 | 6.76 | 7.98 | 10.16 | 9.62  | 7.73 | 4.44  | 12.27 | 9.88  |
| 10.96 | 7.25 | 7.91 | 11.33 | 9.87  | 6.88 | 12.97 | 12.27 | 7.56  |
| 11.51 | 7.19 | 7.99 | 11.46 | 9.94  | 6.3  | 12.28 | 12.25 | 8.23  |
| 11.03 | 8.03 | 8.22 | 10.94 | 9.71  | 8.1  | 11.2  | 11.73 | 8.85  |
| 7.54  | 7.11 | 7.97 | 7.19  | 7.99  | 7.97 | 2.58  | 9.38  | 8.27  |
| 6.67  | 7.43 | 8.18 | 0.86  | 7.97  | 7.8  | 1.86  | 8.78  | 7.96  |
| 6.63  | 7.32 | 7.81 | 2.77  | 7.96  | 7.88 | 3.35  | 8.56  | 7.47  |
| 9.62  | 8.15 | 7.48 | 9.84  | 8.45  | 8.29 | 1.01  | 10.58 | 8.14  |
| 10.62 | 8.51 | 8.08 | 10.14 | 8.99  | 8.48 | 2.4   | 11.11 | 7.59  |
| 10.13 | 7.62 | 7.63 | 10.35 | 8.81  | 7.5  | 1.69  | 11.42 | 7.27  |
| 10.64 | 9.07 | 8.11 | 9.76  | 8.82  | 8.5  | 2.74  | 10.84 | 7.86  |
| 8.14  | 6.68 | 7.18 | 6.79  | 7.37  | 7.01 | 3.77  | 8.81  | 7.48  |
| 7.61  | 6.44 | 7.21 | 7.1   | 7.36  | 6.95 | 0.25  | 9.34  | 6.9   |
| 7.64  | 5.9  | 7.01 | 7.95  | 7.6   | 6.55 | 0.34  | 10    | 6.97  |
| 6.66  | 7.38 | 7.63 | 0     | 8     | 6.76 | 0     | 8.01  | 7.7   |
| 6.83  | 6.79 | 7.58 | 4.66  | 7.53  | 7.42 | 1.34  | 8.06  | 7.44  |
| 6.56  | 6.56 | 7.45 | 4.8   | 6.93  | 7.35 | 1.1   | 7.96  | 7.31  |
| 6.86  | 6.61 | 7.68 | 5.83  | 7.15  | 7.59 | 1.31  | 8.28  | 7.23  |
| 7.37  | 7.77 | 6.87 | 2.41  | 7.84  | 6.32 | 2.41  | 7.05  | 6.41  |
| 7.61  | 7.8  | 8.29 | 7.16  | 8.14  | 8.04 | 4.96  | 9.32  | 8.08  |
| 7.11  | 7.73 | 8.6  | 0.33  | 9.07  | 8.22 | 0.33  | 9.12  | 8.23  |
| 9.4   | 6.65 | 7.44 | 9.83  | 8.61  | 6.98 | 2.45  | 11.04 | 7.65  |
| 7.74  | 7.73 | 7.92 | 7.64  | 8.47  | 7.83 | 2.33  | 9.5   | 7.88  |
| 9.1   | 7.41 | 8.09 | 8.37  | 8.26  | 7.83 | 2.11  | 10.74 | 8.9   |
| 7.85  | 6.91 | 8.2  | 6.88  | 8.14  | 8.37 | 1.3   | 10.01 | 8.29  |
| 6.9   | 7.36 | 8.47 | 2.29  | 7.8   | 8.77 | 3.29  | 8.61  | 7.9   |
| 8     | 8.25 | 8.32 | 6.03  | 8.27  | 8.18 | 1.9   | 9.31  | 8.26  |
| 8.54  | 7.13 | 8.08 | 9.27  | 8.41  | 7.41 | 3.08  | 11.13 | 7.69  |
| 9.53  | 6.71 | 7.9  | 9.7   | 8.51  | 7.57 | 2.91  | 11.42 | 7.66  |
| 9.41  | 6.89 | 7.96 | 9.42  | 8.52  | 7.72 | 3.21  | 11.21 | 8.07  |

<https://mc.manuscriptcentral.com/gut>

|    |       |      |      |       |       |      |       |       |       |
|----|-------|------|------|-------|-------|------|-------|-------|-------|
| 1  |       |      |      |       |       |      |       |       |       |
| 2  | 9.35  | 7.38 | 8.13 | 9.35  | 8.24  | 7.72 | 2.27  | 11.18 | 8.19  |
| 3  | 10.07 | 8.47 | 8.34 | 11.24 | 9.95  | 7.75 | 3.69  | 13.08 | 9.51  |
| 4  | 10.59 | 7.64 | 8.33 | 11.13 | 9.81  | 7.73 | 2.65  | 12.94 | 8.81  |
| 5  | 9.56  | 7.76 | 7.62 | 10.94 | 9.46  | 7.1  | 3.55  | 12.91 | 8.97  |
| 6  | 9.61  | 7.27 | 7.75 | 11.04 | 9.49  | 6.99 | 2.41  | 12.94 | 9.05  |
| 7  | 9.64  | 8.65 | 8.73 | 10.38 | 9.46  | 8.15 | 7.19  | 11.97 | 9.43  |
| 8  | 11.01 | 7.89 | 8.18 | 11.51 | 9.79  | 7.27 | 5.3   | 13.14 | 9.32  |
| 9  | 10.38 | 7.95 | 8.16 | 11.44 | 9.52  | 7.35 | 7.88  | 12.89 | 9.2   |
| 10 | 12.12 | 9.32 | 8.65 | 11.54 | 10.24 | 8.06 | 3.33  | 12.61 | 9.55  |
| 11 | 10.5  | 7.94 | 8.44 | 12.61 | 9.86  | 7.97 | 6.09  | 14.19 | 9.8   |
| 12 | 10.59 | 8.35 | 8.87 | 12.08 | 9.42  | 8.1  | 5.34  | 13.21 | 8.97  |
| 13 | 10.43 | 8.19 | 8.85 | 12.2  | 9.54  | 7.92 | 5.03  | 12.96 | 9.4   |
| 14 | 10.77 | 8.16 | 8.57 | 12.36 | 9.64  | 8.03 | 5.02  | 13.75 | 8.86  |
| 15 | 9.96  | 7.27 | 7.97 | 9.71  | 8.94  | 7.82 | 6.09  | 12    | 8.8   |
| 16 | 10.32 | 6.88 | 7.87 | 10.4  | 9.39  | 7.32 | 6.77  | 12.44 | 8.92  |
| 17 | 11.53 | 8.49 | 8.49 | 10.27 | 9.32  | 8.03 | 3.85  | 11.71 | 8.61  |
| 18 | 10.24 | 7.9  | 8.55 | 10.21 | 9.44  | 8.73 | 2.32  | 11.69 | 9.8   |
| 19 | 10.46 | 7.37 | 8.17 | 10.75 | 9.47  | 7.99 | 2.99  | 12.52 | 8.4   |
| 20 | 10.79 | 9.23 | 8.71 | 10.92 | 9.6   | 8.82 | 2.52  | 12.1  | 9.19  |
| 21 | 9.97  | 7.92 | 7.91 | 10.7  | 9.22  | 7.82 | 1.93  | 12.28 | 9.21  |
| 22 | 9.67  | 7.09 | 7.88 | 10.23 | 9.09  | 7.3  | 1.87  | 12.46 | 8.03  |
| 23 | 9.17  | 6.06 | 7.19 | 10.19 | 9.25  | 6.09 | 2.06  | 12.1  | 6.52  |
| 24 | 10.61 | 7.96 | 8.43 | 10.25 | 9.29  | 7.74 | 3.43  | 12.01 | 8.61  |
| 25 | 10.88 | 8.09 | 8.14 | 10.41 | 9.38  | 7.51 | 3.93  | 12.33 | 8.48  |
| 26 | 12.96 | 8.54 | 8.4  | 11.67 | 10.45 | 7.4  | 5.15  | 12.96 | 9.4   |
| 27 | 9.05  | 6.98 | 7.48 | 9.61  | 8.75  | 7.61 | 1.36  | 10.29 | 8.37  |
| 28 | 9.47  | 7.59 | 7.62 | 9.65  | 8.55  | 7.27 | 2.38  | 10.33 | 7.76  |
| 29 | 8.48  | 6.27 | 6.87 | 9.53  | 8.85  | 5.97 | 0.76  | 10.6  | 7.39  |
| 30 | 9.94  | 9.24 | 8.07 | 10.09 | 8.5   | 8.57 | 1.9   | 10.93 | 7.33  |
| 31 | 5.57  | 6.76 | 7.57 | 4.93  | 8.75  | 7.59 | 1.76  | 7.73  | 7.08  |
| 32 | 8.29  | 6.89 | 7.54 | 7.89  | 8.97  | 7.36 | 0.72  | 9.1   | 7.15  |
| 33 | 6.79  | 6.77 | 7.99 | 0.88  | 8.8   | 7.69 | 3.21  | 7.78  | 7.39  |
| 34 | 7.11  | 6.91 | 7.59 | 4.86  | 8.74  | 7.45 | 1.96  | 7.96  | 7.28  |
| 35 | 7.84  | 6.13 | 6.65 | 9.63  | 7.69  | 6.6  | 1.36  | 11.07 | 7.49  |
| 36 | 8.4   | 6.53 | 6.87 | 8.97  | 7.56  | 6.87 | 3.12  | 10.27 | 7.54  |
| 37 | 8.47  | 6.71 | 7.21 | 8.86  | 7.48  | 7.14 | 0     | 10.16 | 7.64  |
| 38 | 9.01  | 7.32 | 7.25 | 8.87  | 7.52  | 7.2  | 0.17  | 10.34 | 7.83  |
| 39 | 9.43  | 7.12 | 9.47 | 10    | 9.64  | 8.97 | 1.94  | 11.29 | 10.52 |
| 40 | 10.39 | 7.42 | 8.42 | 10.63 | 9.53  | 7.34 | 4.46  | 12.47 | 8.71  |
| 41 | 10.82 | 6.35 | 7.87 | 10.91 | 9.61  | 6.86 | 10.04 | 12.53 | 8.6   |
| 42 | 12.04 | 5.69 | 7.52 | 11.77 | 10.31 | 5.55 | 11.74 | 13.13 | 9.47  |
| 43 | 9.43  | 7.42 | 7.46 | 10.33 | 9.41  | 6.89 | 9.78  | 12.78 | 8.09  |
| 44 | 12.15 | 6.1  | 8.32 | 11.38 | 10.1  | 5.51 | 8.97  | 12.6  | 9.1   |
| 45 | 10.59 | 8.48 | 8.13 | 11.1  | 9.41  | 7.7  | 4.51  | 12.86 | 8.17  |
| 46 | 10.86 | 8.41 | 7.95 | 11.29 | 9.59  | 8.12 | 2.26  | 12.95 | 7.93  |
| 47 | 9.73  | 5.85 | 7.21 | 9.92  | 9.81  | 3.49 | 5.07  | 12.5  | 8.69  |
| 48 | 10.26 | 7.64 | 8.11 | 9.99  | 9.89  | 6.73 | 3.68  | 12.05 | 9.58  |
| 49 | 10    | 7.52 | 7.69 | 10.12 | 10.16 | 7.03 | 3.6   | 12.1  | 9.64  |
| 50 | 10.09 | 7.61 | 7.89 | 9.7   | 9.45  | 7.19 | 3.06  | 11.72 | 9.15  |
| 51 | 9.36  | 8.51 | 7.57 | 10.24 | 8.54  | 7.46 | 1.16  | 11.21 | 8.86  |
| 52 | 9.71  | 8.32 | 6.89 | 9.36  | 7.89  | 7.28 | 1.53  | 10.39 | 7.69  |
| 53 | 9.54  | 8.11 | 7.31 | 9.23  | 8.05  | 7.21 | 1.42  | 10.17 | 7.97  |

1  
2  
3  
4  
5  
6  
7  
8  
9  
10  
11  
12  
13  
14  
15  
16  
17  
18  
19  
20  
21  
22  
23  
24  
25  
26  
27  
28  
29  
30  
31  
32  
33  
34  
35  
36  
37  
38  
39  
40  
41  
42  
43  
44  
45  
46  
47  
48  
49  
50  
51  
52  
53  
54  
55  
56  
57  
58  
59  
60

|       |      |      |       |      |      |      |       |      |
|-------|------|------|-------|------|------|------|-------|------|
| 10.94 | 8.97 | 7.49 | 10.38 | 8.85 | 7.33 | 2.79 | 11.11 | 7.96 |
| 9.23  | 8.37 | 7.25 | 10.8  | 9.39 | 6.77 | 4.27 | 10.93 | 8.2  |
| 8.2   | 6.39 | 6.98 | 10.11 | 8.97 | 6.08 | 5.8  | 11.62 | 8.02 |
| 8.31  | 5.95 | 7.24 | 10.06 | 9.31 | 5.44 | 6.79 | 11.19 | 7.96 |
| 8.93  | 6.25 | 7.25 | 9.06  | 8.32 | 6.41 | 5.8  | 10.34 | 7.88 |
| 9.66  | 7    | 7.38 | 9.96  | 8.77 | 7.12 | 0.57 | 12.46 | 8.36 |
| 8.66  | 5.07 | 5.65 | 10.34 | 8.59 | 5.35 | 1.39 | 12.5  | 6.91 |
| 8.69  | 4.71 | 5.6  | 10.52 | 8.68 | 5.08 | 1.67 | 12.48 | 6.55 |
| 6.05  | 6.97 | 7.8  | 0.27  | 7.18 | 7.38 | 2.27 | 8.36  | 7.34 |
| 9.35  | 6.99 | 7.58 | 8.72  | 8.26 | 7.56 | 1.28 | 10.26 | 8.33 |
| 10.07 | 8.09 | 8.31 | 10.04 | 9.03 | 8.08 | 3.9  | 11.62 | 9.41 |
| 9.98  | 8.02 | 7.93 | 9.95  | 8.72 | 7.63 | 2.89 | 12.02 | 8.51 |
| 10.59 | 8.37 | 8.04 | 10.33 | 9.26 | 7.84 | 2.89 | 12.01 | 9.01 |
| 10.58 | 8.7  | 8.47 | 9.88  | 8.92 | 8.14 | 2.71 | 11.44 | 9.01 |
| 12.14 | 4.54 | 6.13 | 13.13 | 9.88 | 2.54 | 5.87 | 13.89 | 9.16 |
| 9.77  | 5.53 | 7.12 | 10.99 | 9.65 | 6.31 | 0.8  | 11.8  | 7.83 |
| 9.41  | 6.78 | 7.14 | 9.61  | 8.79 | 7.01 | 2.04 | 11.1  | 8.17 |
| 9.98  | 5.56 | 7.21 | 11.14 | 9.97 | 6.07 | 2.07 | 12    | 8.05 |

1  
2  
3  
4  
5  
6  
7  
8  
9  
10  
11  
12  
13  
14  
15  
16  
17  
18  
19  
20  
21  
22  
23  
24  
25  
26  
27  
28  
29  
30  
31  
32  
33  
34  
35  
36  
37  
38  
39  
40  
41  
42  
43  
44  
45  
46  
47  
48  
49  
50  
51  
52  
53  
54  
55  
56  
57  
58  
59  
60

| AMH  | ANG  | ANGPT1 | ANGPT2 | ANGPTL2 | ANGPTL4 | ANPEP | ANXA2P2 | AP1M2 |
|------|------|--------|--------|---------|---------|-------|---------|-------|
| 6.63 | 7.15 | 7      | 7.4    | 7.19    | 5.42    | 10.23 | 10.87   | 5.97  |
| 6.06 | 7.09 | 7.06   | 8.18   | 8.18    | 7.24    | 7.22  | 12.77   | 7.67  |
| 5.33 | 7.16 | 7.29   | 7.67   | 8.14    | 7.26    | 6.81  | 12.81   | 7.43  |
| 4.7  | 6.5  | 6.46   | 7.42   | 10      | 7.82    | 6.46  | 13.41   | 7.7   |
| 7.65 | 8.23 | 8.37   | 8.14   | 8.5     | 1.01    | 8.38  | 11.47   | 1.01  |
| 6.26 | 7.11 | 6.98   | 6.95   | 8.34    | 4.81    | 7.61  | 12.67   | 7.55  |
| 5.53 | 7.45 | 7.16   | 7.15   | 8.05    | 5.62    | 8.15  | 12.96   | 7.7   |
| 5.64 | 7.42 | 6.54   | 6.48   | 10.48   | 6.7     | 6.48  | 14.93   | 8.39  |
| 3.83 | 7.62 | 5.72   | 6.12   | 8.94    | 6.76    | 9.52  | 12.64   | 8.56  |
| 5.52 | 7.45 | 7.05   | 6.16   | 8.39    | 6.14    | 7.36  | 12.57   | 8.34  |
| 3.38 | 7.72 | 6.49   | 5.13   | 8.24    | 7.31    | 10.22 | 12.95   | 8.68  |
| 4    | 6.95 | 6.52   | 5.85   | 9.4     | 7.9     | 7.61  | 13.31   | 8.37  |
| 7.52 | 6.96 | 7.12   | 6.33   | 7.51    | 4.23    | 7.33  | 11.81   | 8.43  |
| 6.84 | 7.06 | 7.92   | 6.85   | 8.59    | 4.07    | 8.33  | 12.01   | 7.94  |
| 5.47 | 5.47 | 7.26   | 4.77   | 10.51   | 4.58    | 4.94  | 13.83   | 6.9   |
| 6.64 | 7.81 | 6.94   | 6.99   | 7.84    | 6.11    | 7.42  | 12.73   | 6.5   |
| 6.65 | 8.46 | 7.24   | 7.24   | 8.53    | 4.99    | 7.22  | 13.22   | 7.31  |
| 7.01 | 8.14 | 7.32   | 7.74   | 9.87    | 6.76    | 7.63  | 13.67   | 6.78  |
| 6.72 | 7.36 | 5.9    | 6.48   | 10.03   | 6.47    | 9.06  | 13.12   | 7.67  |
| 5.75 | 7.57 | 5.95   | 6.35   | 9.04    | 5.14    | 9.21  | 12.73   | 8.61  |
| 5.73 | 6.69 | 6.17   | 5.99   | 9.34    | 6.16    | 7.11  | 12.53   | 7.79  |
| 4.73 | 7.52 | 7.09   | 6.3    | 9.2     | 5.7     | 8.09  | 13.37   | 8.87  |
| 3.78 | 7.35 | 7.01   | 6.39   | 8.81    | 5.78    | 7.9   | 13.24   | 9.11  |
| 2.7  | 7.45 | 6.74   | 5.35   | 8.96    | 6.14    | 7.78  | 13.08   | 8.81  |
| 2.43 | 5.56 | 6.82   | 6.36   | 7.13    | 7.28    | 10.26 | 11.51   | 7.61  |
| 3.13 | 7.67 | 5.99   | 6.59   | 7.36    | 6.28    | 8.53  | 13.87   | 9.19  |
| 3.69 | 7.68 | 5.47   | 6.77   | 7.13    | 6.86    | 10.29 | 13.75   | 9.13  |
| 6.09 | 7.93 | 7.12   | 7.45   | 7.24    | 5.96    | 9.17  | 13.09   | 8.37  |
| 6.33 | 6.65 | 6.95   | 6.94   | 7.24    | 4.74    | 11.33 | 11.97   | 7.7   |
| 6.3  | 7.36 | 7      | 6.9    | 8.12    | 5.61    | 8.56  | 12.5    | 7.47  |
| 5.9  | 7.05 | 6.69   | 6.85   | 7.99    | 5.44    | 9.96  | 11.89   | 7.7   |
| 7.07 | 7.71 | 7.57   | 7.38   | 8.55    | 4.52    | 9.23  | 12.45   | 7.31  |
| 7.09 | 7.15 | 6.35   | 7.3    | 7.28    | 5.97    | 7.43  | 10.39   | 0.35  |
| 5.27 | 7.79 | 5.73   | 7.13   | 9.05    | 7.02    | 6.04  | 12.55   | 7.79  |
| 5.37 | 8.21 | 5.31   | 7.68   | 8.81    | 8.47    | 6.72  | 12.87   | 8.54  |
| 5.38 | 8.15 | 5.11   | 6.76   | 9.55    | 4.56    | 6.28  | 12.74   | 7.77  |
| 5.25 | 4.45 | 3.9    | 4.35   | 8.32    | 4.53    | 5.2   | 13.7    | 6.8   |
| 5.49 | 5.16 | 4.73   | 4.61   | 9.31    | 6.44    | 8.36  | 13.14   | 7.63  |
| 5.17 | 4.89 | 5.72   | 5.17   | 9.84    | 5.12    | 6.54  | 12.86   | 6.74  |
| 5.17 | 4.2  | 5.24   | 4.91   | 9.29    | 4.44    | 5.95  | 12.58   | 6.77  |
| 5.68 | 7.62 | 7.17   | 6.78   | 7.79    | 6.24    | 6.96  | 11.28   | 6.62  |
| 5.42 | 7.6  | 7.33   | 7      | 8.55    | 5.57    | 7.05  | 11.13   | 7.24  |
| 5.08 | 7.73 | 7.49   | 6.66   | 8.06    | 4.68    | 6.43  | 10.69   | 6.63  |
| 4.34 | 7.81 | 6.66   | 5.9    | 8.14    | 4.46    | 6.49  | 11.34   | 7.64  |
| 5.45 | 6.32 | 6.86   | 6.67   | 9.11    | 7.38    | 8.64  | 13.09   | 7.45  |
| 4.4  | 8.15 | 5.74   | 5.22   | 7.64    | 5.56    | 7.16  | 11.87   | 7.8   |
| 3.58 | 7.67 | 6.51   | 5.95   | 8.02    | 6.21    | 7.88  | 12.23   | 7.7   |
| 2.81 | 7.12 | 6.96   | 5.42   | 8.73    | 5.64    | 7.34  | 12.1    | 7.17  |
| 3.96 | 5.96 | 6.28   | 6.39   | 8.63    | 7.11    | 10.52 | 13.41   | 7.84  |
| 3.71 | 6.14 | 6.29   | 6.52   | 9.27    | 6.83    | 9.46  | 13.23   | 7.78  |
| 4.4  | 6.05 | 5.4    | 5.89   | 8.58    | 6.54    | 10.1  | 13.11   | 7.53  |

<https://mc.manuscriptcentral.com/gut>

|    |      |      |      |      |       |      |       |       |       |
|----|------|------|------|------|-------|------|-------|-------|-------|
| 1  |      |      |      |      |       |      |       |       |       |
| 2  | 3.99 | 6.38 | 6.21 | 5.96 | 9.12  | 6.44 | 9.18  | 13.2  | 7.31  |
| 3  | 6.18 | 7.1  | 7.44 | 6.65 | 7.49  | 4.84 | 7.22  | 13.1  | 7.84  |
| 4  | 5.89 | 7.08 | 8.04 | 7.13 | 8.33  | 4.58 | 7.52  | 13.18 | 7.66  |
| 5  | 5.41 | 7    | 7.59 | 7.02 | 8.28  | 4.81 | 7.2   | 13.3  | 7.88  |
| 6  | 6.2  | 6.94 | 7.8  | 6.46 | 7.79  | 3.97 | 7.2   | 13.12 | 7.58  |
| 7  | 4.55 | 8.19 | 5.87 | 7.29 | 7.96  | 7.39 | 6.94  | 13.81 | 7.41  |
| 8  | 4.57 | 8.65 | 5.29 | 6.89 | 7.81  | 8.44 | 9.99  | 13.75 | 8.67  |
| 9  | 4.29 | 9.12 | 5.05 | 6.47 | 6.88  | 5.73 | 11.69 | 13.78 | 8.62  |
| 10 | 5.08 | 8.82 | 5.3  | 6.76 | 8.47  | 7.44 | 11.14 | 13.71 | 8.94  |
| 11 | 7.87 | 4.11 | 3.75 | 6.46 | 6.63  | 7.08 | 6.03  | 11.76 | 7.97  |
| 12 | 6.69 | 7.14 | 5.45 | 6.03 | 7.55  | 6.3  | 7     | 12.53 | 8.26  |
| 13 | 7.03 | 4.62 | 5.37 | 6.27 | 6.97  | 5.31 | 6.62  | 12.28 | 8.28  |
| 14 | 6.72 | 4.62 | 5.23 | 5.5  | 7.88  | 5.84 | 6.73  | 12.17 | 8.28  |
| 15 | 8.96 | 6.15 | 6.74 | 8.32 | 11.08 | 6.74 | 9.15  | 12.57 | 8.32  |
| 16 | 8.65 | 7.88 | 7.33 | 7.33 | 11.18 | 4.88 | 8.46  | 14.61 | 7.77  |
| 17 | 7.84 | 8.02 | 7.64 | 7.36 | 10.02 | 4.36 | 7.94  | 13.28 | 7.02  |
| 18 | 9.53 | 9.66 | 8.71 | 9.05 | 9     | 1.83 | 9.91  | 10.77 | 1.83  |
| 19 | 9.54 | 9.25 | 8.54 | 9.22 | 9.41  | 1.77 | 9.56  | 11.48 | 2.36  |
| 20 | 6.37 | 6.63 | 6.93 | 7.77 | 7.43  | 3.6  | 6.33  | 13.03 | 8.41  |
| 21 | 6.52 | 6.99 | 6.92 | 7.56 | 6.86  | 3.17 | 6.63  | 13.19 | 8.64  |
| 22 | 6.9  | 7.28 | 7.29 | 7.26 | 8.19  | 4.26 | 7.85  | 13.09 | 8.3   |
| 23 | 5.73 | 8.17 | 5.45 | 6.29 | 8.41  | 6.12 | 8.43  | 13.25 | 8.68  |
| 24 | 6.32 | 8.49 | 5.92 | 6.45 | 8.05  | 6.03 | 7.5   | 12.89 | 8.46  |
| 25 | 5.8  | 7.96 | 7.78 | 7.53 | 7.83  | 5.51 | 7.62  | 12.1  | 7.32  |
| 26 | 6.16 | 8.65 | 6.22 | 6.57 | 8.43  | 7.14 | 6.49  | 13.81 | 9.42  |
| 27 | 6.02 | 8.16 | 5.53 | 7.44 | 9.42  | 7.26 | 6.67  | 13.96 | 9.26  |
| 28 | 5.9  | 7.75 | 6.33 | 7.13 | 9.67  | 8.62 | 7.33  | 14.01 | 9.24  |
| 29 | 5.85 | 7.47 | 7.24 | 6.88 | 8.07  | 5.31 | 7.05  | 11.65 | 10.07 |
| 30 | 5.71 | 7.17 | 7.37 | 6.94 | 8.15  | 5.37 | 7.14  | 11.65 | 9.8   |
| 31 | 5.64 | 7.14 | 7.41 | 7.08 | 8.07  | 5.2  | 7.08  | 11.58 | 9.94  |
| 32 | 6.58 | 7.74 | 7.92 | 8.25 | 7.95  | 6.18 | 10.03 | 12.58 | 7.96  |
| 33 | 6.15 | 7.75 | 7.53 | 7.47 | 7.64  | 4.01 | 11.13 | 12.79 | 8.43  |
| 34 | 6.7  | 8    | 7.71 | 7.69 | 7.92  | 4.45 | 11.24 | 13.01 | 8.4   |
| 35 | 6.28 | 7.67 | 7.29 | 7.39 | 9.35  | 9.34 | 7.52  | 12.9  | 7.98  |
| 36 | 6.14 | 7.74 | 7.5  | 7.65 | 9.25  | 9.19 | 8.35  | 13.27 | 8.02  |
| 37 | 6.64 | 7.51 | 7.18 | 7.62 | 9.74  | 9.72 | 7.81  | 13.14 | 7.78  |
| 38 | 6.78 | 7.58 | 7.73 | 7.84 | 8.08  | 7.33 | 7.65  | 12.5  | 6.5   |
| 39 | 6.78 | 7.58 | 7.73 | 7.84 | 8.08  | 7.33 | 7.65  | 12.5  | 6.5   |
| 40 | 6.56 | 7.79 | 7.24 | 7.09 | 8.57  | 3.73 | 7.38  | 13.47 | 8.1   |
| 41 | 6.2  | 7.8  | 7.72 | 7.46 | 9.47  | 6.89 | 9.67  | 13.2  | 7.81  |
| 42 | 6.61 | 7.78 | 7.1  | 7    | 8.82  | 6.56 | 7.15  | 13.16 | 7.63  |
| 43 | 6.14 | 7.84 | 7.53 | 7.63 | 7.17  | 4.95 | 7.77  | 10.77 | 5.01  |
| 44 | 6.47 | 7.56 | 7.31 | 7.59 | 8.47  | 6.13 | 8.13  | 12.27 | 7.59  |
| 45 | 5.53 | 7.43 | 7.31 | 7.32 | 8.29  | 5.53 | 9.95  | 12.77 | 8.17  |
| 46 | 5.9  | 7.87 | 7.84 | 7.42 | 8.82  | 5.07 | 9.02  | 12.21 | 6.74  |
| 47 | 7.6  | 5.9  | 6.33 | 5.92 | 9.32  | 6.2  | 10.2  | 13.6  | 8.72  |
| 48 | 7.41 | 6.25 | 5.08 | 6.12 | 8.34  | 6.87 | 10.24 | 14.03 | 9.01  |
| 49 | 7.77 | 6.1  | 6.38 | 5.69 | 10.62 | 6.22 | 9.96  | 14.18 | 8.4   |
| 50 | 6.32 | 7.2  | 7.57 | 7.81 | 6.81  | 6.49 | 7.74  | 11.69 | 5.58  |
| 51 | 6.73 | 7.54 | 7.57 | 7.65 | 9.95  | 5.87 | 7.67  | 11.98 | 5.77  |
| 52 | 6.01 | 7.54 | 7.69 | 7.52 | 9.18  | 4.16 | 7.41  | 11.91 | 6.39  |
| 53 | 6.53 | 7.57 | 7.76 | 7.36 | 8.26  | 4.1  | 7.14  | 12.63 | 7     |
| 54 |      |      |      |      |       |      |       |       |       |
| 55 |      |      |      |      |       |      |       |       |       |
| 56 |      |      |      |      |       |      |       |       |       |
| 57 |      |      |      |      |       |      |       |       |       |
| 58 |      |      |      |      |       |      |       |       |       |
| 59 |      |      |      |      |       |      |       |       |       |
| 60 |      |      |      |      |       |      |       |       |       |

<https://mc.manuscriptcentral.com/gut>

1  
2  
3  
4  
5  
6  
7  
8  
9  
10  
11  
12  
13  
14  
15  
16  
17  
18  
19  
20  
21  
22  
23  
24  
25  
26  
27  
28  
29  
30  
31  
32  
33  
34  
35  
36  
37  
38  
39  
40  
41  
42  
43  
44  
45  
46  
47  
48  
49  
50  
51  
52  
53  
54  
55  
56  
57  
58  
59  
60

|      |      |      |      |       |      |       |       |       |
|------|------|------|------|-------|------|-------|-------|-------|
| 6.82 | 7.26 | 7.41 | 7.5  | 8.58  | 5.62 | 6.72  | 12.98 | 7.43  |
| 7.34 | 7.74 | 7.8  | 8.03 | 10.17 | 4.53 | 7.87  | 13.18 | 5.73  |
| 5.77 | 7.13 | 5.51 | 6.77 | 7.62  | 6.78 | 7.86  | 11.97 | 7.49  |
| 5.63 | 7.98 | 5.57 | 6.92 | 9.67  | 7.88 | 7.53  | 13.99 | 7.33  |
| 5.3  | 7.8  | 6.64 | 6.58 | 10.21 | 6.49 | 6.78  | 13.26 | 6.51  |
| 3.99 | 6.41 | 5.49 | 6.98 | 10.07 | 5.9  | 7.76  | 14.08 | 5.73  |
| 4.01 | 8.07 | 4.45 | 6.79 | 9.04  | 8.76 | 6.94  | 13.62 | 8.99  |
| 4.46 | 7.08 | 5.11 | 6.6  | 9.6   | 8.85 | 7.12  | 13.74 | 9.01  |
| 5.95 | 7.35 | 6.95 | 6.49 | 12.77 | 8.2  | 5.95  | 16.05 | 7.74  |
| 5.88 | 6.6  | 4.96 | 5.65 | 8.25  | 4.38 | 10.88 | 13.76 | 7.41  |
| 3.95 | 7.52 | 5.25 | 6.19 | 7.97  | 5.25 | 9.13  | 13.01 | 7.46  |
| 5.32 | 7.44 | 6.81 | 6.83 | 6.92  | 5.41 | 9.86  | 11.91 | 6.8   |
| 6.35 | 7.47 | 6.65 | 6.26 | 12.34 | 6.58 | 7.39  | 14.83 | 7.35  |
| 7.53 | 8.96 | 9.65 | 8.68 | 8.51  | 0    | 8.76  | 9.76  | 0.79  |
| 6.75 | 5.12 | 5.37 | 6.05 | 7.89  | 6.05 | 7.31  | 12.73 | 10.13 |
| 6.4  | 4.54 | 5.23 | 6.14 | 7.49  | 5.51 | 8.3   | 12.7  | 10.27 |
| 6.72 | 5.43 | 5.19 | 5.84 | 7.98  | 4.52 | 7     | 12.67 | 10.11 |
| 3.24 | 6.48 | 5.43 | 5.91 | 9.45  | 4.56 | 10.98 | 13.3  | 7.56  |
| 5.61 | 7.02 | 6.34 | 7.02 | 9.21  | 4.32 | 7.63  | 12.69 | 6.35  |
| 5.35 | 6.25 | 5.75 | 6.8  | 9.25  | 5.23 | 6.37  | 13.01 | 6.41  |
| 7.16 | 7.16 | 7.49 | 5.16 | 13.19 | 5.16 | 8.62  | 17.03 | 7.16  |
| 3.13 | 6.96 | 4.63 | 7.36 | 7.23  | 6.63 | 9.37  | 13.74 | 7.47  |
| 3.34 | 7.11 | 5.12 | 6.15 | 8.21  | 6.6  | 9.92  | 13.58 | 7.61  |
| 4.88 | 8.61 | 6.09 | 5.99 | 9.34  | 7.16 | 8.79  | 13.76 | 7.29  |
| 4.91 | 8.58 | 6.97 | 6.26 | 10.57 | 6.76 | 6.66  | 14.08 | 7.66  |
| 4.54 | 7.68 | 5.83 | 6.13 | 9.37  | 7.39 | 6.27  | 13.21 | 6.77  |
| 7.57 | 7.97 | 8.34 | 8.12 | 8.04  | 1    | 7.85  | 10.48 | 4.17  |
| 7.91 | 8.31 | 8.34 | 8.4  | 7.59  | 0.86 | 8.06  | 9.51  | 2.86  |
| 6.9  | 8.23 | 8.28 | 8.19 | 7.52  | 1.77 | 7.98  | 9.08  | 2.77  |
| 1.01 | 5.26 | 4.47 | 6.2  | 7.13  | 6.5  | 9.56  | 11.59 | 6.48  |
| 1.18 | 5.78 | 5.66 | 5.66 | 9.75  | 4.29 | 7.41  | 11.67 | 5.45  |
| 2.92 | 5.78 | 5.78 | 4.97 | 9.38  | 4.5  | 8.2   | 12.16 | 6.93  |
| 0.16 | 5.61 | 5.94 | 6.51 | 8.04  | 6.63 | 8.89  | 11.48 | 5.83  |
| 7.11 | 7.81 | 7.37 | 7.44 | 7.43  | 0.45 | 7.8   | 10.26 | 1.45  |
| 5.71 | 7.25 | 7.51 | 7.45 | 7.01  | 1.25 | 6.91  | 11.05 | 3.25  |
| 6.73 | 6.89 | 7.2  | 7.29 | 6.87  | 1.34 | 7.04  | 11.31 | 4.3   |
| 7.68 | 8.05 | 7.41 | 8.08 | 7.27  | 0.32 | 8.52  | 9.25  | 0.32  |
| 6.86 | 7.56 | 7.73 | 7.56 | 6.95  | 1.34 | 7.19  | 9.22  | 1.34  |
| 6.23 | 7.57 | 7.35 | 7.7  | 7.47  | 1.1  | 7     | 9.31  | 1.1   |
| 6.26 | 7.46 | 7.72 | 7.52 | 7.75  | 1.89 | 7.12  | 9.64  | 2.63  |
| 7.9  | 7.58 | 6.11 | 7.17 | 8.14  | 2.41 | 8.71  | 8.97  | 2.41  |
| 7.95 | 8.46 | 8.44 | 8.45 | 7.56  | 3.06 | 7.99  | 10.5  | 3.06  |
| 7.71 | 8.71 | 8.79 | 8.63 | 7.76  | 0.33 | 8.59  | 9.95  | 0.91  |
| 7.39 | 8.21 | 7.47 | 7.45 | 7.71  | 2.87 | 7.41  | 12.65 | 7.08  |
| 7.56 | 8.33 | 8.06 | 8.3  | 7.82  | 1.75 | 8.17  | 11.14 | 4.14  |
| 7.29 | 8.05 | 7.38 | 7.58 | 8.06  | 3.69 | 7.77  | 11.77 | 4.62  |
| 7.83 | 8.48 | 8.22 | 7.77 | 8.3   | 2.3  | 8.37  | 10.93 | 2.62  |
| 6.9  | 8.39 | 8.67 | 8.1  | 7.38  | 0.71 | 8.35  | 9.11  | 2.71  |
| 8.39 | 8.7  | 7.75 | 8.29 | 8.67  | 2.48 | 8.77  | 10.59 | 1.9   |
| 4.67 | 7.65 | 7.82 | 6.72 | 6.56  | 5.89 | 7.15  | 10.81 | 6.64  |
| 3.44 | 7.81 | 7.49 | 6.54 | 7.05  | 5.68 | 7.35  | 11.53 | 7.15  |
| 6.27 | 7.8  | 7.23 | 6.56 | 7.53  | 5.84 | 7.65  | 11.54 | 7.05  |

<https://mc.manuscriptcentral.com/gut>

1  
2  
3  
4  
5  
6  
7  
8  
9  
10  
11  
12  
13  
14  
15  
16  
17  
18  
19  
20  
21  
22  
23  
24  
25  
26  
27  
28  
29  
30  
31  
32  
33  
34  
35  
36  
37  
38  
39  
40  
41  
42  
43  
44  
45  
46  
47  
48  
49  
50  
51  
52  
53  
54  
55  
56  
57  
58  
59  
60

|      |      |      |      |       |      |       |       |      |
|------|------|------|------|-------|------|-------|-------|------|
| 6.76 | 7.99 | 7.53 | 6.71 | 7.24  | 6.57 | 7.93  | 11.35 | 6.91 |
| 6.22 | 8.37 | 7.17 | 7.32 | 8.13  | 5.32 | 6.96  | 12.55 | 8.53 |
| 6.64 | 8.85 | 7.37 | 7.14 | 9.83  | 5.58 | 8.15  | 12.76 | 8.6  |
| 6.06 | 8.65 | 7.3  | 7.01 | 8.32  | 5.95 | 7.46  | 12.22 | 8.43 |
| 6.04 | 8.8  | 7.43 | 6.91 | 8.18  | 4.91 | 7.54  | 12.32 | 8.61 |
| 7.27 | 7.77 | 7.34 | 7.85 | 7.71  | 6.19 | 8.3   | 12.47 | 8.08 |
| 6.43 | 8.08 | 6.82 | 6.13 | 9.54  | 6.65 | 10.67 | 14.19 | 8.82 |
| 6.19 | 8.28 | 6.13 | 6.28 | 8.62  | 6.28 | 7.86  | 13.69 | 8.54 |
| 6.41 | 8.06 | 7.48 | 6.17 | 10.62 | 7.34 | 6.3   | 13.43 | 7.44 |
| 5.67 | 7.1  | 5.89 | 7.75 | 8.69  | 8.32 | 7.19  | 14.4  | 8.77 |
| 7.49 | 7.23 | 5.95 | 7.7  | 8.94  | 5.95 | 7.12  | 12.96 | 8    |
| 7.58 | 7.23 | 6.19 | 7.73 | 9.41  | 5.97 | 7.54  | 13.21 | 7.96 |
| 7.56 | 7.53 | 5.56 | 7.6  | 9.27  | 6.87 | 6.59  | 13.31 | 8.19 |
| 4.84 | 7.94 | 6.16 | 7.21 | 7.17  | 6    | 7.87  | 12.57 | 9    |
| 2.09 | 8.22 | 5.64 | 6.4  | 8     | 6.61 | 8.45  | 13.04 | 9.64 |
| 5    | 7.66 | 7.32 | 6.8  | 10.4  | 5.64 | 6.57  | 13.23 | 8.03 |
| 4.58 | 6.85 | 5.8  | 6.06 | 7.53  | 6.57 | 7.15  | 12.35 | 6.44 |
| 3.67 | 7.91 | 4.99 | 5.57 | 9.65  | 6.22 | 8.37  | 13.18 | 8.28 |
| 2.84 | 6.67 | 5.43 | 5.91 | 10.26 | 5.33 | 6.79  | 13.13 | 7.44 |
| 4.32 | 7.2  | 5.6  | 5.02 | 7.57  | 5.51 | 6.04  | 12.82 | 7.51 |
| 4.07 | 5.92 | 5.43 | 6.73 | 9.36  | 6.84 | 7.66  | 12.76 | 8.76 |
| 3.48 | 5.9  | 4.76 | 5.97 | 7.82  | 5.06 | 6.81  | 12.52 | 9.09 |
| 6.15 | 7.79 | 6.91 | 7.15 | 8.31  | 4.91 | 7.23  | 12.08 | 6.86 |
| 6.06 | 7.6  | 6.71 | 6.79 | 8.35  | 4.39 | 8.57  | 12.16 | 6.42 |
| 6.61 | 7.15 | 7.32 | 6.32 | 11.77 | 6.74 | 5.96  | 14.37 | 6.32 |
| 2.36 | 5.12 | 4.17 | 4.75 | 6.55  | 5.01 | 8.22  | 10.58 | 5.92 |
| 4.38 | 6.81 | 5.88 | 5.96 | 7.57  | 5.38 | 8.42  | 10.92 | 6.41 |
| 3.67 | 6.27 | 5.57 | 6.01 | 7.29  | 4.09 | 7.42  | 10.72 | 6.45 |
| 1.9  | 5.9  | 5.36 | 5.99 | 9.42  | 6.07 | 7.68  | 10.74 | 6.22 |
| 6.8  | 7.51 | 7.62 | 7.54 | 7.08  | 1.76 | 9.46  | 8.63  | 1.76 |
| 6.85 | 7.29 | 7.24 | 7.23 | 8.47  | 3.04 | 9.16  | 10.8  | 3.89 |
| 6.59 | 7.67 | 7.83 | 7.96 | 6.82  | 0.88 | 9.2   | 8.36  | 0.88 |
| 6.86 | 7.78 | 7.35 | 7.53 | 7.35  | 1.96 | 9.58  | 9.08  | 0.96 |
| 5.17 | 6.36 | 5.63 | 5.8  | 5.97  | 3.17 | 6.29  | 11.59 | 5.65 |
| 5.79 | 6.52 | 6.65 | 6.42 | 6.92  | 2.98 | 8.56  | 10.86 | 5.36 |
| 5.7  | 6.64 | 6.35 | 6.54 | 7.3   | 3.85 | 6.97  | 10.74 | 4.47 |
| 5.03 | 6.29 | 6.46 | 6.1  | 7.44  | 5.19 | 7.24  | 11.46 | 4.21 |
| 3.81 | 4.6  | 4.94 | 5.44 | 6.33  | 6.03 | 5.48  | 10.52 | 0.35 |
| 5.71 | 7.55 | 6.78 | 6.71 | 8.6   | 5.46 | 11.8  | 12.59 | 8.06 |
| 6.15 | 8.66 | 5.67 | 6.35 | 8.85  | 4.23 | 5.74  | 13.73 | 8.63 |
| 7.79 | 8.26 | 6.14 | 5.82 | 11.27 | 4.82 | 3.23  | 15.46 | 8.21 |
| 6.08 | 7.68 | 6.67 | 6.98 | 7.81  | 6.54 | 10.32 | 12.11 | 7.42 |
| 6.83 | 8.21 | 7.51 | 6.1  | 12.27 | 5.51 | 6.51  | 14.99 | 7.83 |
| 3.45 | 7.53 | 4.45 | 5.62 | 9.28  | 5.23 | 8.32  | 13.07 | 8.38 |
| 3.74 | 7.39 | 5.14 | 5.26 | 9.62  | 4.89 | 4.58  | 12.88 | 8.1  |
| 3.85 | 7.09 | 7.04 | 6.21 | 5.77  | 3.49 | 11.5  | 13.12 | 9.17 |
| 6.05 | 6.84 | 7.01 | 5.6  | 8.64  | 4.15 | 9.99  | 13.28 | 8.61 |
| 3.6  | 6.5  | 6.68 | 5.08 | 8.53  | 4.52 | 10.13 | 13.18 | 8.88 |
| 5.58 | 6.87 | 7.45 | 6.52 | 8.61  | 4.5  | 9.95  | 12.71 | 8.05 |
| 1.89 | 6.17 | 4.57 | 4.78 | 7.22  | 5.66 | 5.86  | 12.02 | 6.62 |
| 5.39 | 6.55 | 6.28 | 6.28 | 7.84  | 5.92 | 6.26  | 10.97 | 5.39 |
| 4.88 | 6.9  | 6.28 | 6.21 | 8.01  | 5.64 | 6.6   | 10.93 | 5.74 |

<https://mc.manuscriptcentral.com/gut>



1  
2  
3  
4  
5  
6  
7  
8  
9  
10  
11  
12  
13  
14  
15  
16  
17  
18  
19  
20  
21  
22  
23  
24  
25  
26  
27  
28  
29  
30  
31  
32  
33  
34  
35  
36  
37  
38  
39  
40  
41  
42  
43  
44  
45  
46  
47  
48  
49  
50  
51  
52  
53  
54  
55  
56  
57  
58  
59  
60

|      |      |      |      |       |      |       |       |      |
|------|------|------|------|-------|------|-------|-------|------|
| 2.37 | 6.34 | 6.77 | 4.37 | 9.57  | 6.81 | 4.37  | 11.9  | 5.79 |
| 6.49 | 5.49 | 6.46 | 7.27 | 8.38  | 5.01 | 5.85  | 11.65 | 7.12 |
| 6.93 | 5.76 | 5.91 | 6.89 | 8.94  | 6.56 | 6.54  | 11.06 | 7.73 |
| 6.86 | 5.7  | 5.74 | 5.98 | 8.48  | 4.29 | 5.85  | 11.03 | 7.85 |
| 7.31 | 7.72 | 8.09 | 7.23 | 11.07 | 3.14 | 7.25  | 11.83 | 4.55 |
| 4.47 | 6.24 | 3.57 | 4.99 | 7.18  | 7.37 | 10.45 | 11.81 | 7.33 |
| 4.59 | 7.05 | 2.77 | 4.35 | 5.84  | 4.24 | 4.15  | 10.87 | 7.24 |
| 3.74 | 7.14 | 3.16 | 4.4  | 6.05  | 4.52 | 3.67  | 11.02 | 7.37 |
| 6.84 | 7.86 | 7.71 | 7.77 | 6.9   | 0.27 | 7.59  | 8.99  | 1.27 |
| 6.08 | 7.49 | 7.26 | 7.25 | 8.23  | 3.28 | 6.93  | 10.8  | 5.53 |
| 3.46 | 5.97 | 5.58 | 5.68 | 7.02  | 5.56 | 11.14 | 12.66 | 6.8  |
| 5.53 | 6.7  | 6.14 | 5.93 | 8.58  | 5.59 | 10.71 | 12.49 | 7.12 |
| 4.95 | 6.83 | 6.03 | 5.3  | 8.94  | 5.92 | 11.39 | 12.77 | 7.02 |
| 5.65 | 6.71 | 6.81 | 6.28 | 8.15  | 6.57 | 10.04 | 12.05 | 6.39 |
| 4.54 | 9.31 | 7    | 5.35 | 10.9  | 8.16 | 4.54  | 15.62 | 7.97 |
| 4.66 | 6.54 | 5.73 | 5.75 | 7.83  | 5.26 | 6.31  | 12.22 | 7.45 |
| 5.38 | 7.01 | 5.95 | 6.91 | 7.05  | 5.34 | 6.91  | 11.04 | 6.83 |
| 4.21 | 6.64 | 5.78 | 5.51 | 8.15  | 4.75 | 6.11  | 12.57 | 7.53 |

1  
2  
3  
4  
5  
6  
7  
8  
9  
10  
11  
12  
13  
14  
15  
16  
17  
18  
19  
20  
21  
22  
23  
24  
25  
26  
27  
28  
29  
30  
31  
32  
33  
34  
35  
36  
37  
38  
39  
40  
41  
42  
43  
44  
45  
46  
47  
48  
49  
50  
51  
52  
53  
54  
55  
56  
57  
58  
59  
60

| APC  | APOD  | APOE  | APOH | AQP1 | ARAP2 | AREG | ARHGAP32 | ARHGDI8 |
|------|-------|-------|------|------|-------|------|----------|---------|
| 6.04 | 8.53  | 10.79 | 4.81 | 7.64 | 6.48  | 4.65 | 5.83     | 9.88    |
| 6.23 | 7.53  | 9.67  | 4.16 | 7.11 | 6.37  | 7.62 | 7.73     | 9.58    |
| 6.15 | 7.61  | 9.61  | 4.33 | 7.06 | 6.78  | 7.19 | 7.47     | 9.34    |
| 5.82 | 9.17  | 10.3  | 0.18 | 8.04 | 6.81  | 7.48 | 7.86     | 10.12   |
| 7.03 | 8.04  | 7.71  | 7.05 | 8.69 | 2.59  | 5.33 | 2.01     | 9.15    |
| 6.03 | 8.56  | 10.09 | 4.85 | 7.67 | 5.87  | 5.58 | 6.61     | 9.76    |
| 5.9  | 8.23  | 10.55 | 4.62 | 7.55 | 6.19  | 6.71 | 6.31     | 9.94    |
| 5.6  | 8.95  | 12.34 | 0.39 | 8.18 | 6.07  | 6.28 | 7.14     | 10.88   |
| 5.61 | 7.65  | 13.8  | 2.95 | 6.78 | 6.32  | 4.07 | 7.26     | 10.46   |
| 5.91 | 8.93  | 10.04 | 4.08 | 6.93 | 5.23  | 5.27 | 7.46     | 8.53    |
| 6.08 | 8.41  | 10.82 | 1.38 | 6.16 | 6.16  | 5.7  | 7.75     | 9.18    |
| 5.85 | 11.01 | 11.72 | 0.68 | 7.17 | 6.27  | 6.21 | 7.79     | 9.66    |
| 6.33 | 7.73  | 9.07  | 4.35 | 7.78 | 8.01  | 8.18 | 8.22     | 8.5     |
| 6.33 | 6.9   | 9.74  | 4.32 | 8.01 | 7.89  | 8.16 | 7.91     | 9.32    |
| 6.02 | 9.96  | 13.35 | 3.35 | 8.26 | 6.81  | 5.35 | 7.19     | 11.69   |
| 6.15 | 11.1  | 11.54 | 4.53 | 7.74 | 6.87  | 6.56 | 7.72     | 10.17   |
| 6.9  | 11.89 | 11.15 | 3.61 | 7.66 | 6.87  | 6.15 | 7.98     | 9.12    |
| 6.25 | 11.32 | 11.06 | 4.46 | 8.21 | 6.38  | 4.93 | 8        | 9.01    |
| 6.44 | 7.45  | 12.22 | 1.9  | 7.63 | 7.86  | 5.36 | 7.1      | 11.98   |
| 6.44 | 7.54  | 11.3  | 1.89 | 6.85 | 7.78  | 6.1  | 7.55     | 10.79   |
| 6.41 | 9.18  | 11.83 | 2.96 | 8.1  | 8     | 4.67 | 6.98     | 11.48   |
| 6.56 | 11.51 | 10.69 | 3.15 | 7.94 | 6.51  | 7.24 | 8.17     | 10.15   |
| 6.29 | 11.5  | 10.38 | 0.2  | 7.34 | 6.8   | 7.6  | 8.08     | 10.19   |
| 6.34 | 11.89 | 10.93 | 2.22 | 8.15 | 6.62  | 6.85 | 8        | 9.85    |
| 5.23 | 8.92  | 12.5  | 6.92 | 6.01 | 5.98  | 3.89 | 5.64     | 9.7     |
| 6.08 | 7.5   | 8.88  | 1.71 | 6.68 | 6.57  | 6.71 | 7.46     | 9.24    |
| 5.91 | 7.26  | 9     | 0.52 | 7.78 | 6.54  | 6.01 | 7.51     | 8.83    |
| 5.77 | 8.28  | 8.94  | 3.82 | 8.02 | 6.29  | 6.67 | 7.34     | 9.18    |
| 5.89 | 6.59  | 9.65  | 3.6  | 7.09 | 6.48  | 5.76 | 7.39     | 9.39    |
| 6.02 | 8.62  | 10.5  | 3.86 | 7.85 | 5.96  | 6.09 | 7.69     | 9.6     |
| 5.48 | 8.16  | 9.48  | 3.2  | 7.66 | 5.84  | 5.37 | 8.25     | 8.74    |
| 6.35 | 8.91  | 10.89 | 5.17 | 8.13 | 5.46  | 5.41 | 7.69     | 9.39    |
| 6.95 | 8.79  | 11.13 | 3.81 | 7.15 | 7.54  | 6.5  | 5.15     | 11.34   |
| 6.4  | 12.78 | 11.62 | 2.38 | 6.49 | 5.87  | 4.52 | 7.22     | 9.73    |
| 5.76 | 9.39  | 11.02 | 2.42 | 5.68 | 6.04  | 6.61 | 7.16     | 9.66    |
| 5.96 | 11.87 | 11.37 | 0.47 | 6.83 | 5.99  | 4.28 | 7.13     | 9.95    |
| 5.77 | 4.77  | 13.1  | 1.45 | 5.49 | 7.07  | 6.35 | 5.57     | 11.24   |
| 6.05 | 4.99  | 10.89 | 1.4  | 5.33 | 7.55  | 7.32 | 6.37     | 10.13   |
| 6.2  | 6.3   | 12.13 | 1.37 | 6.39 | 7.78  | 6.25 | 5.83     | 10.63   |
| 5.53 | 6.7   | 12.25 | 2.74 | 6.44 | 7.82  | 5.99 | 5.39     | 10.84   |
| 5.37 | 6.74  | 10.48 | 4.6  | 7.7  | 5.39  | 3.6  | 5.29     | 9.09    |
| 5.39 | 6.68  | 8.82  | 4.22 | 7.79 | 5.42  | 4.54 | 5.92     | 7.96    |
| 5.39 | 6.41  | 8.76  | 4.61 | 8.09 | 5.17  | 3.68 | 5.47     | 8.05    |
| 4.94 | 5.62  | 9.2   | 3.27 | 8.23 | 5.9   | 3.9  | 5.82     | 8.3     |
| 5.18 | 9.24  | 13.23 | 7.61 | 8.07 | 2.86  | 2.86 | 5.45     | 9.3     |
| 5.64 | 9.07  | 9.16  | 2.31 | 8.26 | 6.25  | 5.4  | 6.84     | 9.09    |
| 5.52 | 10.17 | 9.75  | 1.58 | 8.99 | 6.49  | 5.49 | 6.41     | 8.96    |
| 5.45 | 11.43 | 9.98  | 1.81 | 8.35 | 6.11  | 5.27 | 6.6      | 8.98    |
| 6.31 | 9.1   | 12.95 | 0.63 | 7.11 | 7.69  | 8.15 | 8.45     | 10.61   |
| 6.49 | 7.9   | 11.61 | 2.01 | 7.17 | 7.57  | 7.61 | 8.32     | 9.78    |
| 6.85 | 5.74  | 12.47 | 0.5  | 6.72 | 7.85  | 7.91 | 8.44     | 9.95    |

<https://mc.manuscriptcentral.com/gut>

|    |      |       |       |      |       |      |      |      |       |
|----|------|-------|-------|------|-------|------|------|------|-------|
| 1  |      |       |       |      |       |      |      |      |       |
| 2  | 6.62 | 9.17  | 12.36 | 1.08 | 6.95  | 7.95 | 6.82 | 8.08 | 10.2  |
| 3  | 5.89 | 9.44  | 10.56 | 3.84 | 7.52  | 6.79 | 8.78 | 9.39 | 9.13  |
| 4  | 5.65 | 9.62  | 9.88  | 4.44 | 7.96  | 8.31 | 9.03 | 9.37 | 8.9   |
| 5  | 5.76 | 9.56  | 10.25 | 4.04 | 7.71  | 8.25 | 8.8  | 9.5  | 8.67  |
| 6  | 6.01 | 9.72  | 10.65 | 5.05 | 7.84  | 8.24 | 9.1  | 9.49 | 8.96  |
| 7  | 5.75 | 7.61  | 11.51 | 0.23 | 6.48  | 7.49 | 5.48 | 8.09 | 10.7  |
| 8  | 5.25 | 6.8   | 11.84 | 0.25 | 7.31  | 7.07 | 5.25 | 8.3  | 9.32  |
| 9  | 5.19 | 4.25  | 10.57 | 1.81 | 6.09  | 6.84 | 4.86 | 8.5  | 8.35  |
| 10 | 5.69 | 8.28  | 11.53 | 3.25 | 8.01  | 6.53 | 5.14 | 8.02 | 9.17  |
| 11 | 6.35 | 8.77  | 10.41 | 5.54 | 6.03  | 6.84 | 7.36 | 9.76 | 9.28  |
| 12 | 6.47 | 8.7   | 9.99  | 4.63 | 6.35  | 6.97 | 7.52 | 7.95 | 9.46  |
| 13 | 6.06 | 8.57  | 9.67  | 4.27 | 5.77  | 6.62 | 7.61 | 7.81 | 9.08  |
| 14 | 6.19 | 10.02 | 10.01 | 4.23 | 6.55  | 6.62 | 7.74 | 8.02 | 9.05  |
| 15 | 8.15 | 9.67  | 11.93 | 5.15 | 11.42 | 6.74 | 5.15 | 6.15 | 11.54 |
| 16 | 7.02 | 7.61  | 12.82 | 3.11 | 8.34  | 5.31 | 7.18 | 6.65 | 10.88 |
| 17 | 6.98 | 7.47  | 11.95 | 4.7  | 7.99  | 5.74 | 6.45 | 6.37 | 10.13 |
| 18 | 8.44 | 9.27  | 7.4   | 4.77 | 9.74  | 2.24 | 5.45 | 0.24 | 10.94 |
| 19 | 8.27 | 8.6   | 8.28  | 5.17 | 9.97  | 2.77 | 6.17 | 1.77 | 10.3  |
| 20 | 6.31 | 5.78  | 6.72  | 4.23 | 7.35  | 6.75 | 7.62 | 8.08 | 8.45  |
| 21 | 6.43 | 5.77  | 6.61  | 4.47 | 7.19  | 7.13 | 8.21 | 8.51 | 8.22  |
| 22 | 6.65 | 6.84  | 8.64  | 4.99 | 7.6   | 6.69 | 7.03 | 7.93 | 8.93  |
| 23 | 6.12 | 10    | 10.71 | 0    | 8     | 6.58 | 7.84 | 7.96 | 9.45  |
| 24 | 5.77 | 10.33 | 10.16 | 1.28 | 8.38  | 6.47 | 7.47 | 7.48 | 8.81  |
| 25 | 6.57 | 10.33 | 9.63  | 5.14 | 8.37  | 6.18 | 6.33 | 6.66 | 8.35  |
| 26 | 6.42 | 8.23  | 10.12 | 0.64 | 6.47  | 7.89 | 8.66 | 8.83 | 10.59 |
| 27 | 5.8  | 6.85  | 10.15 | 1.63 | 7.16  | 7.78 | 8.84 | 8.93 | 9.88  |
| 28 | 6.01 | 8.79  | 11.29 | 3.5  | 8.13  | 7.82 | 7.8  | 9.29 | 9.8   |
| 29 | 6.4  | 6.96  | 10.27 | 4.45 | 7.18  | 6.24 | 7.41 | 7.57 | 9.11  |
| 30 | 6.25 | 7.77  | 10.08 | 4.3  | 7.21  | 5.68 | 6.59 | 7.24 | 8.86  |
| 31 | 6.69 | 7.95  | 10.54 | 5.06 | 7.26  | 5.74 | 6.89 | 7.22 | 9.04  |
| 32 | 6.83 | 9.6   | 10.39 | 5.58 | 8.04  | 8.45 | 8.34 | 9.33 | 9.29  |
| 33 | 6.71 | 7.43  | 10.36 | 5.72 | 7.78  | 7.23 | 7.93 | 9    | 8.9   |
| 34 | 6.93 | 7.08  | 10.04 | 5.55 | 8.07  | 7.51 | 7.49 | 8.63 | 8.89  |
| 35 | 6.21 | 8.76  | 9.76  | 4.98 | 7.41  | 6.05 | 4.86 | 7.95 | 9     |
| 36 | 6.37 | 7.67  | 9.1   | 5.43 | 7.61  | 6.48 | 5.55 | 7.75 | 9.12  |
| 37 | 6.57 | 9.05  | 9.5   | 4.78 | 7.33  | 6.03 | 5.65 | 7.67 | 9.39  |
| 38 | 6.46 | 9.2   | 10.46 | 5.79 | 7.89  | 6.22 | 6.52 | 6.34 | 10.05 |
| 39 | 6.46 | 9.2   | 10.46 | 5.79 | 7.89  | 6.22 | 6.52 | 6.34 | 10.05 |
| 40 | 6.93 | 10.03 | 9.38  | 5.1  | 7.76  | 5.64 | 7.4  | 7.04 | 9.03  |
| 41 | 6.85 | 10.33 | 9.91  | 5.67 | 7.92  | 5.18 | 7.42 | 7.11 | 8.89  |
| 42 | 6.95 | 11.46 | 10.48 | 5.01 | 7.76  | 6.33 | 6.13 | 7.55 | 9.01  |
| 43 | 6.93 | 8.1   | 9.91  | 6.44 | 7.95  | 5.88 | 5.76 | 5.08 | 9.94  |
| 44 | 6.39 | 9.71  | 10.2  | 6.39 | 7.89  | 6.13 | 6.67 | 6.64 | 9.33  |
| 45 | 6.42 | 8.49  | 9.37  | 5.88 | 7.47  | 6.61 | 7.37 | 7.07 | 9.05  |
| 46 | 6.54 | 10.01 | 9.77  | 6.13 | 8.25  | 5.74 | 5.26 | 6.42 | 9.3   |
| 47 | 6.41 | 10.62 | 11.23 | 0    | 8.44  | 6.14 | 8.52 | 8.4  | 9.54  |
| 48 | 5.98 | 7.82  | 8.99  | 0.08 | 8.54  | 6.19 | 8.93 | 8.53 | 8.71  |
| 49 | 6.3  | 9.33  | 12.05 | 2.52 | 8.58  | 6.3  | 8.31 | 8.09 | 10.41 |
| 50 | 6.53 | 8.02  | 9.74  | 5.96 | 7.94  | 6.51 | 5.28 | 5.96 | 10.21 |
| 51 | 6.8  | 11.53 | 10.18 | 5.51 | 8.17  | 5.02 | 5.72 | 7.05 | 9.18  |
| 52 | 6.61 | 12.19 | 10.33 | 5.46 | 8.01  | 4.92 | 5.92 | 6.92 | 8.94  |
| 53 | 6.12 | 6.98  | 8.82  | 5.35 | 7.94  | 5.1  | 6.01 | 7.06 | 8.74  |

1  
2  
3  
4  
5  
6  
7  
8  
9  
10  
11  
12  
13  
14  
15  
16  
17  
18  
19  
20  
21  
22  
23  
24  
25  
26  
27  
28  
29  
30  
31  
32  
33  
34  
35  
36  
37  
38  
39  
40  
41  
42  
43  
44  
45  
46  
47  
48  
49  
50  
51  
52  
53  
54  
55  
56  
57  
58  
59  
60

|      |       |       |      |       |      |      |      |       |
|------|-------|-------|------|-------|------|------|------|-------|
| 6.17 | 7.15  | 8.39  | 5.02 | 7.62  | 5.5  | 6.57 | 7.65 | 8.75  |
| 7.02 | 8.5   | 9.11  | 5.78 | 7.99  | 3.78 | 5.91 | 6.42 | 9.01  |
| 6.36 | 10.04 | 10.79 | 2.25 | 7.9   | 7.88 | 6.83 | 5.93 | 11.25 |
| 6.63 | 11.72 | 9.95  | 0.08 | 8.95  | 7.72 | 7.98 | 8.52 | 10.37 |
| 6.44 | 12.35 | 11.45 | 2.49 | 9.26  | 7.08 | 6.27 | 7.92 | 10.37 |
| 5.83 | 8.19  | 11.87 | 1.41 | 8.49  | 6.69 | 7.06 | 6.36 | 11.14 |
| 6.15 | 6.42  | 9.85  | 0    | 4.91  | 6.38 | 6.23 | 7.37 | 8.7   |
| 6.11 | 7.92  | 10.25 | 0    | 5.71  | 6.17 | 6.3  | 7.03 | 9.17  |
| 6.89 | 10.66 | 13.3  | 2.49 | 8.25  | 5.08 | 6.82 | 6.82 | 11.24 |
| 6.32 | 7.51  | 12.84 | 3.38 | 10.79 | 6.28 | 5.32 | 7.59 | 10.5  |
| 5.88 | 7.04  | 9.56  | 1.49 | 10.05 | 5.78 | 5.62 | 8.08 | 9.49  |
| 5.75 | 6.92  | 8.1   | 4.94 | 9.56  | 4.89 | 5.02 | 7.13 | 8.1   |
| 4.26 | 8.28  | 12.27 | 2.26 | 10.94 | 5.58 | 4.26 | 7.39 | 10.79 |
| 6.71 | 8.89  | 7.27  | 6.2  | 9.52  | 0.2  | 4.06 | 1.52 | 9.04  |
| 5.23 | 8.54  | 10.11 | 1.95 | 6.7   | 5.23 | 6.17 | 8.98 | 7.89  |
| 5.12 | 5.16  | 9.8   | 1.42 | 6.42  | 5.33 | 6.62 | 9.27 | 7.92  |
| 5.1  | 9.71  | 10.12 | 1.84 | 6.72  | 5.4  | 6.39 | 8.98 | 8.17  |
| 5.52 | 6.54  | 11.05 | 2.02 | 5.27  | 8.09 | 7.12 | 7.96 | 10.3  |
| 6.13 | 6.95  | 10.42 | 2.67 | 6.59  | 7.3  | 5.37 | 7.24 | 9.67  |
| 6.33 | 7.9   | 11.24 | 2.2  | 6.43  | 7.8  | 6.01 | 7.22 | 10.36 |
| 6.75 | 8.16  | 14.72 | 5.16 | 12.31 | 6.75 | 5.16 | 5.16 | 9.92  |
| 5.09 | 6.39  | 9.56  | 2.94 | 8.27  | 6.85 | 6.53 | 6.93 | 8.85  |
| 5.93 | 7.85  | 11.02 | 2.12 | 8.36  | 6.6  | 5.49 | 6.99 | 9.86  |
| 6.18 | 10.02 | 10.55 | 6.54 | 7.04  | 5.43 | 4.5  | 7.01 | 9.3   |
| 5.49 | 9.9   | 10.99 | 6.4  | 8.44  | 5.61 | 3.91 | 7.04 | 10.14 |
| 6.03 | 10.4  | 10.88 | 6.52 | 7.31  | 6.5  | 5.3  | 7.26 | 10.15 |
| 7.02 | 8.82  | 9.26  | 6.17 | 8.84  | 2.58 | 4.32 | 3.32 | 8.62  |
| 7.07 | 7.83  | 5.9   | 6.74 | 8.75  | 1.86 | 4.18 | 0.86 | 8.15  |
| 7.09 | 7.79  | 7.09  | 6.09 | 8.52  | 1.77 | 4.94 | 3.35 | 8.07  |
| 4.82 | 9.18  | 10.85 | 0.01 | 6.99  | 6.44 | 4.65 | 6.2  | 9.31  |
| 4.64 | 10.66 | 9.42  | 0.59 | 7.56  | 4.88 | 4.76 | 6.07 | 8.84  |
| 4.86 | 10.44 | 9.61  | 0.11 | 7.55  | 4.86 | 5.69 | 5.66 | 9.12  |
| 4.74 | 11.84 | 10.4  | 0.16 | 7.59  | 5.68 | 5.83 | 6.11 | 9.36  |
| 6.43 | 7.64  | 9.87  | 4.26 | 8.09  | 0.45 | 4.36 | 0.45 | 8.82  |
| 5.95 | 7.26  | 6.92  | 5.57 | 7.47  | 2.84 | 4.16 | 3.71 | 7.33  |
| 5.68 | 7.18  | 8.19  | 4.93 | 7.38  | 4.15 | 3.8  | 4.87 | 7.64  |
| 7.21 | 8.21  | 5.55  | 5    | 8.06  | 0.32 | 5.57 | 0    | 9.02  |
| 6.19 | 6.98  | 7.01  | 6.14 | 7.86  | 2.92 | 4.14 | 2.92 | 7.73  |
| 5.74 | 7.14  | 6.52  | 5.74 | 7.27  | 1.1  | 5    | 2.1  | 7.18  |
| 5.86 | 7.35  | 6.26  | 5.59 | 7.7   | 2.89 | 4.77 | 2.31 | 7.47  |
| 7.37 | 7.58  | 7.22  | 2.41 | 9.63  | 2.41 | 8.39 | 2.41 | 10.89 |
| 7.18 | 8.08  | 9.66  | 6.41 | 8.4   | 3.64 | 5.14 | 3.64 | 8.85  |
| 7.35 | 8.1   | 6.45  | 6.74 | 8.81  | 0.91 | 5.08 | 0    | 8.6   |
| 6.33 | 6.95  | 10.77 | 6.98 | 8.12  | 5.19 | 5.12 | 6.19 | 8.86  |
| 7.11 | 7.79  | 9.11  | 6.09 | 8.22  | 3.07 | 5.27 | 4.14 | 8.56  |
| 6.62 | 8.25  | 9.36  | 5.78 | 8.2   | 4.39 | 5.11 | 4.62 | 9.29  |
| 6.7  | 8.68  | 7.72  | 6.54 | 8.86  | 2.62 | 4.54 | 2.3  | 8.44  |
| 6.84 | 8.42  | 4.51  | 6.75 | 8.71  | 2.71 | 5.23 | 0.71 | 8.28  |
| 7.67 | 8.68  | 7.64  | 5.29 | 8.37  | 2.9  | 6.37 | 3.22 | 9.36  |
| 6.23 | 6.9   | 9.8   | 4.72 | 6.51  | 5.72 | 7.03 | 7.78 | 8.57  |
| 6.22 | 7.28  | 10.58 | 4.87 | 6.14  | 5.79 | 7.84 | 8.03 | 8.84  |
| 6.12 | 7.51  | 10.68 | 4.84 | 6.76  | 5.46 | 7.81 | 8.13 | 8.82  |

<https://mc.manuscriptcentral.com/gut>

1  
2  
3  
4  
5  
6  
7  
8  
9  
10  
11  
12  
13  
14  
15  
16  
17  
18  
19  
20  
21  
22  
23  
24  
25  
26  
27  
28  
29  
30  
31  
32  
33  
34  
35  
36  
37  
38  
39  
40  
41  
42  
43  
44  
45  
46  
47  
48  
49  
50  
51  
52  
53  
54  
55  
56  
57  
58  
59  
60

|      |       |       |      |       |      |      |      |       |
|------|-------|-------|------|-------|------|------|------|-------|
| 6.44 | 8.18  | 11.08 | 5.44 | 6.81  | 5.76 | 8.23 | 7.39 | 8.98  |
| 6.98 | 8.4   | 11.96 | 3.69 | 7.73  | 7.17 | 4.91 | 7.35 | 10.32 |
| 7.05 | 7.61  | 11.12 | 3.97 | 7.97  | 6.62 | 8.06 | 7.76 | 9.95  |
| 7.01 | 7.48  | 10.68 | 4.83 | 7.9   | 7.1  | 4.99 | 7.41 | 8.85  |
| 6.92 | 7.45  | 11.4  | 4.41 | 7.73  | 7.03 | 5.04 | 7.25 | 9.3   |
| 7.06 | 9.82  | 11.04 | 5.35 | 7.47  | 7.09 | 5.55 | 7.56 | 10.93 |
| 6.99 | 10.16 | 11.99 | 2.43 | 7.7   | 6.99 | 6.91 | 8.46 | 10.81 |
| 6.46 | 9.58  | 10.8  | 2.56 | 6.83  | 7.27 | 7.56 | 8.33 | 10.16 |
| 7.23 | 11.77 | 12.46 | 3.06 | 9.36  | 7.08 | 4.65 | 7.84 | 11.37 |
| 6.26 | 8.8   | 12.42 | 3.09 | 8.17  | 6.35 | 5.09 | 8.25 | 10.14 |
| 7.02 | 9.71  | 11.67 | 3.49 | 8.65  | 6.54 | 5.49 | 7.63 | 10.23 |
| 6.86 | 8.8   | 12.15 | 1.97 | 8.53  | 6.22 | 4.97 | 7.3  | 10.4  |
| 6.65 | 9.86  | 11.83 | 2.65 | 8.88  | 5.68 | 4.97 | 7.71 | 9.95  |
| 6.16 | 7.47  | 11.49 | 4.87 | 8.62  | 6.18 | 3.87 | 6.96 | 9.68  |
| 5.85 | 8.24  | 10.9  | 4.76 | 8.44  | 7.01 | 5.49 | 7.36 | 9.75  |
| 6.34 | 10.95 | 11.11 | 4.9  | 9.25  | 5.9  | 5.54 | 6.41 | 10.07 |
| 6.17 | 10.26 | 11.53 | 1.58 | 7.67  | 7.41 | 5.08 | 6.52 | 11.35 |
| 5.84 | 9.05  | 10.65 | 1.67 | 7.52  | 7.01 | 5.37 | 7.67 | 9.72  |
| 6.1  | 11.13 | 11.87 | 1.52 | 7.54  | 6.84 | 5.43 | 7.23 | 10.15 |
| 5.45 | 9.32  | 11.29 | 0    | 6.67  | 7.04 | 5.57 | 8.14 | 9.96  |
| 5.79 | 5.69  | 8.67  | 1.87 | 5.33  | 6.23 | 10   | 8.63 | 8.79  |
| 5.61 | 4.76  | 7.81  | 0    | 5.03  | 7.53 | 9.81 | 8.83 | 7.93  |
| 5.91 | 10.21 | 9.64  | 4.81 | 8.2   | 6.19 | 7.33 | 6.43 | 9.74  |
| 6.02 | 9.16  | 9.65  | 4.51 | 8.27  | 6.39 | 7.29 | 6.39 | 9.62  |
| 5.47 | 12.55 | 12.23 | 4.74 | 10.58 | 5.47 | 7.06 | 6.61 | 10.6  |
| 4.53 | 7.8   | 11.32 | 0.36 | 5.57  | 6.7  | 6.01 | 5.22 | 10.3  |
| 5.18 | 9.02  | 10.06 | 1.79 | 6.41  | 6.46 | 6.65 | 5.96 | 9.24  |
| 5.49 | 6.41  | 10.16 | 0    | 5.12  | 5.95 | 6.09 | 6.84 | 8.69  |
| 4.48 | 9.21  | 9.76  | 1.9  | 7.03  | 6.9  | 6.36 | 6.42 | 9.41  |
| 6.22 | 6.66  | 7.01  | 5.93 | 7.71  | 1.76 | 4.08 | 1.76 | 6.97  |
| 5.93 | 6.63  | 8.05  | 5.53 | 7.33  | 3.3  | 4.97 | 4.3  | 7.7   |
| 6.38 | 6.93  | 4.79  | 5.88 | 7.65  | 2.47 | 4.34 | 0.88 | 7.51  |
| 5.96 | 6.74  | 7.07  | 5.91 | 7.61  | 0.96 | 4.76 | 2.54 | 7.54  |
| 5.06 | 5.65  | 10.1  | 4.06 | 6.91  | 5.09 | 4.17 | 5.61 | 8.63  |
| 5.75 | 7.67  | 8.42  | 4.61 | 7.14  | 4.36 | 3.36 | 4.91 | 8.05  |
| 5.85 | 8.19  | 9.22  | 4.62 | 7.45  | 4.23 | 3.09 | 4.98 | 8.04  |
| 5.47 | 8.53  | 9.86  | 4.59 | 7.18  | 4.07 | 4.21 | 5.03 | 8.46  |
| 5.88 | 7.15  | 10.84 | 1.94 | 6.89  | 8.01 | 6.19 | 5.44 | 12.07 |
| 5.85 | 8.47  | 9.21  | 1.46 | 6.67  | 6.16 | 8.86 | 7.44 | 9.46  |
| 5.46 | 6.88  | 10.46 | 1.42 | 5.33  | 6.97 | 6.09 | 7.8  | 10.59 |
| 5.69 | 7.59  | 12.47 | 2.23 | 7.48  | 5.82 | 3.23 | 7.79 | 12.05 |
| 5.67 | 6.81  | 11.02 | 4.02 | 7.95  | 5.72 | 4.18 | 7.26 | 9.62  |
| 6.1  | 7.32  | 12.57 | 4.51 | 8.42  | 5.51 | 4.51 | 7.68 | 11.51 |
| 5.51 | 8     | 10.53 | 1.45 | 7.82  | 6.34 | 6.14 | 8.04 | 9.62  |
| 6.06 | 9.21  | 11.44 | 1.52 | 7.59  | 6.34 | 6.08 | 8.29 | 9.54  |
| 4.59 | 10.82 | 10.76 | 3.85 | 7.04  | 3.49 | 6.44 | 8.21 | 7.65  |
| 5.92 | 10.63 | 11.8  | 3.44 | 7.64  | 5.54 | 6.48 | 7.22 | 9.61  |
| 5.28 | 10.91 | 11.62 | 3.45 | 7.3   | 5.49 | 6.77 | 7.39 | 9.22  |
| 5.26 | 10.44 | 10.97 | 4.5  | 7.53  | 5.58 | 5.93 | 6.9  | 9.5   |
| 5.03 | 6.27  | 10.83 | 0    | 5.48  | 6.3  | 7.86 | 6.72 | 9.71  |
| 5.43 | 9.22  | 9.4   | 2.11 | 6.66  | 5.57 | 5.66 | 6.43 | 8.28  |
| 5.36 | 8.99  | 9.48  | 2.42 | 6.96  | 5.23 | 5.74 | 6.16 | 8.43  |

<https://mc.manuscriptcentral.com/gut>

|      |       |       |      |      |      |      |      |       |
|------|-------|-------|------|------|------|------|------|-------|
| 5.25 | 11.13 | 10.66 | 0.79 | 8.22 | 5.04 | 5.31 | 7.11 | 8.67  |
| 4.91 | 5.96  | 8.93  | 3.1  | 6.98 | 5.8  | 4.27 | 7.29 | 8.68  |
| 4.29 | 6.94  | 7.68  | 3.76 | 6.34 | 4.91 | 6.11 | 7.66 | 7.23  |
| 5.29 | 6.6   | 8.05  | 2.81 | 6.24 | 4.57 | 5.62 | 7.71 | 7.5   |
| 5.95 | 8.27  | 9.3   | 4.72 | 8.55 | 1.55 | 1.55 | 3.55 | 8.03  |
| 5.45 | 9.15  | 10.63 | 1.57 | 6.81 | 6.66 | 8.6  | 7.97 | 9.44  |
| 4.93 | 6.92  | 9.99  | 1.07 | 5.24 | 6.55 | 6.1  | 7.66 | 8.91  |
| 4.88 | 6.42  | 9.81  | 0.94 | 5    | 6.15 | 6.33 | 7.61 | 8.71  |
| 6.5  | 7.35  | 5.23  | 5.92 | 8.54 | 1.27 | 3.86 | 0.27 | 7.79  |
| 6.29 | 8.82  | 8.39  | 4.8  | 7.14 | 4.92 | 6.22 | 6.03 | 9.16  |
| 5.72 | 7.25  | 11.95 | 2.24 | 6.96 | 6.83 | 4.11 | 6.28 | 10.51 |
| 5.47 | 10.25 | 11.11 | 3.47 | 7.28 | 6.5  | 4.21 | 6.62 | 9.1   |
| 5.73 | 10.22 | 11.22 | 0.3  | 7.57 | 6.16 | 4.47 | 7    | 9.95  |
| 5.74 | 9.92  | 11.07 | 0.13 | 7.38 | 6.21 | 4.21 | 6.23 | 9.72  |
| 4.87 | 7.59  | 14.32 | 2.54 | 7.83 | 5.54 | 7.4  | 5.71 | 9.87  |
| 5.26 | 11.63 | 12.03 | 6.18 | 6.03 | 5.89 | 3.97 | 5.91 | 9.52  |
| 5.42 | 10.79 | 10.2  | 5.98 | 6.76 | 5.92 | 5.19 | 5.66 | 9.09  |
| 4.8  | 11.9  | 12.38 | 6.31 | 6.28 | 5.66 | 3.84 | 6    | 9.7   |

|    | ASPN | ATPIF1 | B3GNT3 | BAD  | BAG2 | BAI1 | BAI3 | BCAS1 | BGN   |
|----|------|--------|--------|------|------|------|------|-------|-------|
| 1  |      |        |        |      |      |      |      |       |       |
| 2  |      |        |        |      |      |      |      |       |       |
| 3  | 5.54 | 9.13   | 9.24   | 7.02 | 7.42 | 7.04 | 6.41 | 7.03  | 9.17  |
| 4  | 6.89 | 9.34   | 10.63  | 6.95 | 7.39 | 6.46 | 5.33 | 8.53  | 8.66  |
| 5  | 6.92 | 9.3    | 10.11  | 6.95 | 7.53 | 6.53 | 5.92 | 8.14  | 8.5   |
| 6  | 8.27 | 9.33   | 10.41  | 7.25 | 7.62 | 4.27 | 4.64 | 8.22  | 10.43 |
| 7  | 2.01 | 7.22   | 9.09   | 8.03 | 8.67 | 8.79 | 7.92 | 6.22  | 9.68  |
| 8  | 6.89 | 8.97   | 10.05  | 6.81 | 7.57 | 6.66 | 5.85 | 6.35  | 8.88  |
| 9  | 6.67 | 9.25   | 10.28  | 6.86 | 7.33 | 6.2  | 6.22 | 6.76  | 8.91  |
| 10 | 7.43 | 9.03   | 11.08  | 8.15 | 6.96 | 3.56 | 4.3  | 7.29  | 11.08 |
| 11 | 6.79 | 9.53   | 10.83  | 7    | 6.92 | 4.54 | 3.17 | 6.54  | 11.02 |
| 12 | 7.36 | 9.61   | 10.41  | 6    | 7.79 | 6.55 | 6.18 | 6.72  | 9.01  |
| 13 | 7.15 | 10.19  | 10.79  | 6.36 | 7.9  | 3.7  | 3.55 | 7.16  | 8.85  |
| 14 | 7.72 | 10.05  | 10.42  | 6.3  | 8.35 | 3.68 | 5.38 | 6.61  | 10.11 |
| 15 | 6.91 | 9.98   | 9.31   | 6.72 | 7.23 | 6.96 | 6.32 | 5.77  | 8.26  |
| 16 | 8.41 | 9.72   | 9.15   | 7.23 | 7.97 | 7.42 | 6.43 | 5.4   | 9.39  |
| 17 | 8.67 | 8.4    | 9.8    | 8.52 | 7.32 | 5.47 | 3.35 | 6.77  | 12.39 |
| 18 | 6.7  | 9.51   | 9.07   | 7.32 | 7.35 | 7.39 | 6.37 | 6.19  | 10.16 |
| 19 | 7.75 | 9.69   | 9.32   | 7.36 | 8.02 | 7.27 | 6.61 | 6.65  | 9.88  |
| 20 | 8.29 | 8.99   | 9.53   | 7.53 | 7.64 | 7.82 | 6.67 | 7.35  | 10.7  |
| 21 | 5.8  | 9.66   | 10.19  | 7.55 | 6.79 | 5.18 | 2.9  | 7.31  | 11.31 |
| 22 | 8.26 | 10.55  | 10.46  | 7.07 | 7.56 | 2.77 | 4.63 | 8.15  | 9.52  |
| 23 | 8.19 | 10.02  | 9.84   | 7.07 | 8.27 | 4.59 | 5.17 | 6.11  | 9.96  |
| 24 | 8.19 | 9.85   | 10.61  | 7.18 | 8.7  | 5.61 | 3.61 | 8.95  | 9.61  |
| 25 | 7.46 | 9.78   | 10.65  | 7.26 | 8.3  | 4.11 | 4.37 | 8.84  | 8.99  |
| 26 | 8.99 | 9.49   | 10.51  | 7.34 | 9.48 | 4.06 | 4.48 | 8.72  | 9.61  |
| 27 | 6.23 | 9.28   | 3.43   | 6.26 | 8.28 | 6.45 | 2.75 | 2.01  | 7.67  |
| 28 | 5.26 | 10.8   | 10.61  | 7.76 | 6.87 | 2.94 | 2.71 | 9.31  | 7.1   |
| 29 | 5.28 | 10.73  | 10.41  | 7.55 | 7.44 | 4.11 | 3.33 | 9.18  | 7.25  |
| 30 | 5    | 10.1   | 10.1   | 7.96 | 7.2  | 6.44 | 5.72 | 9.25  | 7.66  |
| 31 | 5.09 | 9.58   | 9.98   | 7.36 | 7.36 | 6.74 | 6.19 | 5.25  | 8.98  |
| 32 | 5.9  | 9.05   | 10.2   | 7.61 | 8.14 | 6.98 | 6.51 | 7.09  | 8.9   |
| 33 | 6.42 | 9.59   | 10.36  | 7.26 | 7.72 | 7.07 | 6.1  | 6.62  | 8.8   |
| 34 | 5.66 | 8.74   | 10.06  | 7.86 | 8.26 | 7.44 | 7.07 | 7.08  | 9.86  |
| 35 | 3.52 | 8.71   | 7.27   | 7.1  | 7.44 | 7.35 | 5.72 | 3.59  | 7.22  |
| 36 | 9.81 | 9.68   | 9.34   | 7.24 | 8.11 | 3.64 | 4.52 | 8.18  | 10.57 |
| 37 | 8.03 | 9.97   | 10.18  | 7.33 | 7.3  | 4.52 | 1.2  | 9.41  | 9.64  |
| 38 | 9.32 | 9.58   | 9.58   | 7.59 | 8.22 | 3.64 | 4.86 | 9.44  | 10.75 |
| 39 | 3.25 | 9.08   | 8.9    | 6.69 | 7.64 | 3.9  | 2.45 | 3.62  | 9.72  |
| 40 | 6.63 | 9.46   | 9.74   | 6.02 | 7.9  | 3.21 | 3.31 | 4.4   | 8.32  |
| 41 | 7.77 | 9.16   | 7.78   | 6.63 | 7.59 | 3.69 | 3.69 | 1.95  | 8.8   |
| 42 | 7.13 | 9.06   | 8.08   | 5.85 | 7.87 | 4.39 | 4.27 | 2.74  | 8.48  |
| 43 | 5.13 | 7.61   | 8.16   | 6.37 | 7.47 | 6.79 | 6.32 | 5.35  | 8.84  |
| 44 | 6.56 | 7.61   | 8.53   | 6.22 | 7.5  | 7    | 5.7  | 5.51  | 8.73  |
| 45 | 5.77 | 7.39   | 8.43   | 6.39 | 7.48 | 6.58 | 6.39 | 5.17  | 8.4   |
| 46 | 6.71 | 7.91   | 8.69   | 6.22 | 7.03 | 6.06 | 4.9  | 5.62  | 8.83  |
| 47 | 2.86 | 6.56   | 9.29   | 9.38 | 5.86 | 6.03 | 5.18 | 2.86  | 11.17 |
| 48 | 6.54 | 9.28   | 9.34   | 6.82 | 6.72 | 4.56 | 4.02 | 8.13  | 8.15  |
| 49 | 7.99 | 9.38   | 9.25   | 6.7  | 6.91 | 2.58 | 4.39 | 7.05  | 9.2   |
| 50 | 9.63 | 8.92   | 8.57   | 6.33 | 8.76 | 3.9  | 4.67 | 6.42  | 9.96  |
| 51 | 7.74 | 9.35   | 10.13  | 7.49 | 7.55 | 4.09 | 4.8  | 2.96  | 10.51 |
| 52 | 9.64 | 9.88   | 9.46   | 7.26 | 8.34 | 2.59 | 3.92 | 3.18  | 9.92  |
| 53 | 8.6  | 9.65   | 9.01   | 7.22 | 8.53 | 3.5  | 4.2  | 3.82  | 8.71  |

<https://mc.manuscriptcentral.com/gut>

1  
2  
3  
4  
5  
6  
7  
8  
9  
10  
11  
12  
13  
14  
15  
16  
17  
18  
19  
20  
21  
22  
23  
24  
25  
26  
27  
28  
29  
30  
31  
32  
33  
34  
35  
36  
37  
38  
39  
40  
41  
42  
43  
44  
45  
46  
47  
48  
49  
50  
51  
52  
53  
54  
55  
56  
57  
58  
59  
60

|      |       |       |       |      |       |      |      |       |
|------|-------|-------|-------|------|-------|------|------|-------|
| 9.64 | 9.66  | 9.17  | 6.91  | 8.64 | 3.89  | 4.25 | 3.78 | 10.14 |
| 5.73 | 9.79  | 10.45 | 7.58  | 6.74 | 7.88  | 6.41 | 5.28 | 9.61  |
| 6.38 | 9.56  | 10.61 | 7.37  | 8.09 | 7.8   | 6.34 | 5.14 | 9.03  |
| 6.28 | 9.52  | 10.61 | 7.52  | 7.53 | 7.35  | 6.06 | 5.31 | 8.77  |
| 7.03 | 9.57  | 10.35 | 7.37  | 8.46 | 7.6   | 6.54 | 3.77 | 9.12  |
| 6.23 | 10.59 | 9.72  | 7.38  | 8.14 | 5.81  | 4.81 | 7.38 | 9.81  |
| 7.82 | 11.02 | 10.65 | 7.07  | 7.41 | 5.2   | 3.57 | 8.02 | 9.42  |
| 7.2  | 11.49 | 10.58 | 7.36  | 6.95 | 4.86  | 2    | 8.05 | 8.65  |
| 8.19 | 11.48 | 10.39 | 7.39  | 7.88 | 4.02  | 3.61 | 7.92 | 9.81  |
| 6.3  | 10.86 | 9.59  | 6.57  | 6.07 | 4.9   | 3.04 | 3.04 | 8.82  |
| 7.17 | 10.84 | 9.47  | 7.27  | 6.61 | 3.54  | 3.54 | 7.16 | 8.3   |
| 6.78 | 11.02 | 8.86  | 7.27  | 6.49 | 5.37  | 2.4  | 4.67 | 8.12  |
| 7.64 | 10.84 | 8.61  | 7.02  | 7.72 | 3.3   | 3.44 | 5.02 | 8.59  |
| 5.15 | 7.47  | 8.74  | 11.36 | 8.15 | 10.98 | 7.15 | 6.74 | 13.24 |
| 6.81 | 8.58  | 9.81  | 9.11  | 7.8  | 8.52  | 5.54 | 7.18 | 11.24 |
| 7.06 | 8.66  | 9.27  | 8.22  | 8.37 | 7.43  | 6.65 | 5.95 | 10.09 |
| 1.83 | 8.67  | 10.56 | 9.05  | 8.29 | 10.04 | 7.6  | 7.34 | 10.6  |
| 0.77 | 8.22  | 10.27 | 9.33  | 8.42 | 10.28 | 7.79 | 7.02 | 10.32 |
| 4.39 | 10.22 | 9.93  | 6.87  | 8.99 | 6.55  | 5.87 | 4.31 | 8.13  |
| 3.65 | 10.43 | 10.35 | 6.7   | 8.74 | 6.96  | 5.9  | 3.85 | 7.16  |
| 4.67 | 9.91  | 9.86  | 6.97  | 8.66 | 7.23  | 6.57 | 4.76 | 8.39  |
| 8.64 | 10.32 | 9.9   | 7.21  | 7.37 | 2.9   | 4.18 | 4.8  | 10.35 |
| 8.15 | 10.47 | 9.79  | 7.12  | 7.75 | 6.03  | 5.28 | 4.53 | 9.88  |
| 8.45 | 9.5   | 9.09  | 7.07  | 8.61 | 6.22  | 6.91 | 5.05 | 9.31  |
| 6.47 | 10.44 | 11.05 | 7.53  | 7.54 | 5.64  | 3.64 | 8.63 | 8.95  |
| 7.33 | 10.01 | 10.86 | 7.29  | 8.14 | 5.9   | 3.85 | 7.97 | 10.06 |
| 6.98 | 9.82  | 10.78 | 7.2   | 8.28 | 4.39  | 4.69 | 7.35 | 10.61 |
| 5.72 | 9.34  | 9.01  | 6.8   | 9.11 | 6.87  | 6.03 | 5.45 | 8.64  |
| 7.28 | 9.18  | 8.7   | 7.08  | 9.36 | 6.59  | 6.41 | 3.44 | 8.9   |
| 6.61 | 8.94  | 8.83  | 7.14  | 9.33 | 6.42  | 6.6  | 4.55 | 8.77  |
| 6.9  | 9.27  | 10.41 | 7.56  | 7.74 | 6.96  | 6.96 | 6.82 | 10.16 |
| 6.62 | 9.89  | 10.74 | 7.41  | 7.4  | 7.34  | 6.52 | 6.39 | 8.79  |
| 6.35 | 9.6   | 10.71 | 7.43  | 7.8  | 7.43  | 7.06 | 6.92 | 8.61  |
| 9.02 | 9.23  | 10.47 | 7.44  | 8.45 | 7.19  | 6.27 | 5.48 | 9.73  |
| 8.51 | 9.42  | 10.86 | 7.44  | 8.31 | 7.01  | 6.45 | 6.83 | 9.39  |
| 9.12 | 9.18  | 10.53 | 7.45  | 8.64 | 7.24  | 6.21 | 5.38 | 10.53 |
| 7.08 | 8.41  | 9.04  | 7.34  | 7.83 | 7.21  | 7.04 | 5.86 | 10.04 |
| 7.08 | 8.41  | 9.04  | 7.34  | 7.83 | 7.21  | 7.04 | 5.86 | 10.04 |
| 7.38 | 8.84  | 10.29 | 7.4   | 7.93 | 7.37  | 6.7  | 7.2  | 9.69  |
| 8.46 | 8.68  | 10.11 | 7.42  | 8.98 | 7.14  | 7.02 | 7.49 | 9.64  |
| 8.84 | 8.73  | 9.92  | 7.29  | 8.2  | 7.14  | 6.4  | 7.22 | 11.05 |
| 3.73 | 8.34  | 8.59  | 7.3   | 7.89 | 6.68  | 7.58 | 5.76 | 8     |
| 8.29 | 9.08  | 9.71  | 7.93  | 7.95 | 6.13  | 6.72 | 5.79 | 9.42  |
| 7.42 | 9.76  | 11.1  | 7.67  | 7.9  | 6.23  | 6.23 | 7.08 | 8.67  |
| 8.09 | 8.79  | 9.74  | 7.66  | 8.75 | 6.37  | 7.3  | 6.23 | 9.24  |
| 8.74 | 10.96 | 9.5   | 6.95  | 7.18 | 4.12  | 2.9  | 3.81 | 10.29 |
| 7.66 | 10.84 | 10.04 | 7.05  | 5.47 | 3.4   | 2.08 | 5.29 | 9     |
| 8.67 | 10.21 | 9.26  | 7.74  | 6.32 | 4.6   | 4.22 | 4.6  | 11.37 |
| 5.83 | 8.5   | 8.57  | 6.49  | 7.91 | 6.69  | 7.24 | 6.09 | 9.08  |
| 8.99 | 8.31  | 8.8   | 7.37  | 8.81 | 7.15  | 7.18 | 5.9  | 10.33 |
| 9.45 | 8.45  | 8.94  | 7.03  | 8.73 | 6.13  | 7.3  | 5.31 | 10.34 |
| 7.26 | 8.8   | 9.7   | 6.55  | 7.95 | 5.89  | 6.72 | 6.59 | 9.09  |

<https://mc.manuscriptcentral.com/gut>



|    |      |       |       |       |      |      |      |      |       |
|----|------|-------|-------|-------|------|------|------|------|-------|
| 1  |      |       |       |       |      |      |      |      |       |
| 2  | 7.89 | 9.25  | 9.82  | 6.36  | 7.92 | 5.84 | 6.6  | 6.55 | 9.43  |
| 3  | 7.51 | 8.21  | 9.26  | 7.67  | 8.23 | 7.55 | 7.1  | 5.89 | 11.08 |
| 4  | 5.9  | 9.27  | 8.27  | 6.97  | 7.09 | 6.18 | 4.33 | 7.58 | 9.62  |
| 5  | 7.44 | 9.74  | 10.68 | 7.46  | 7.88 | 5.66 | 4.32 | 8.87 | 9.83  |
| 6  | 8.19 | 9.41  | 10.68 | 7.34  | 8.23 | 5.49 | 5.01 | 9.29 | 10.87 |
| 7  | 7.74 | 9.41  | 9     | 7.2   | 7.76 | 4.73 | 3.58 | 5.73 | 11.55 |
| 8  | 8.2  | 10.52 | 10.22 | 6.74  | 7.94 | 3.25 | 3.01 | 7.04 | 9.24  |
| 9  | 8.17 | 10.36 | 10.1  | 6.65  | 8.63 | 3.93 | 3.56 | 6.52 | 9.55  |
| 10 | 8.85 | 9.03  | 10.06 | 9.75  | 7.62 | 7.02 | 5.08 | 7.08 | 13.27 |
| 11 | 5.96 | 9.13  | 10.29 | 7.77  | 6.28 | 4.49 | 3.38 | 7.73 | 10.8  |
| 12 | 5.95 | 10.12 | 9.65  | 6.66  | 5.78 | 3.3  | 0.49 | 8.18 | 9.21  |
| 13 | 4.85 | 9.58  | 9.48  | 6.46  | 7.05 | 6.54 | 6.1  | 7.12 | 7.83  |
| 14 | 8.65 | 8.6   | 10.32 | 9.55  | 6.26 | 5.43 | 4.85 | 8.02 | 13.59 |
| 15 | 0.2  | 6.92  | 9.48  | 8.44  | 8.75 | 9.86 | 8.19 | 7.12 | 8.46  |
| 16 | 8.32 | 10.2  | 9.82  | 6.65  | 6.25 | 5.37 | 3.41 | 7.45 | 9.05  |
| 17 | 7.09 | 10.34 | 10.03 | 6.66  | 4.92 | 2.83 | 2.64 | 7.24 | 8.28  |
| 18 | 7.78 | 10.11 | 9.91  | 6.53  | 6.87 | 5.1  | 3.69 | 7.52 | 8.77  |
| 19 | 6.46 | 9.63  | 9.88  | 6.37  | 7.16 | 3.52 | 3.02 | 6.55 | 9.27  |
| 20 | 7.54 | 8.58  | 8.9   | 6.7   | 6.89 | 6.33 | 5.13 | 4.16 | 9.43  |
| 21 | 7.7  | 8.82  | 9.11  | 6.38  | 7.1  | 6.07 | 4.04 | 3.57 | 9.6   |
| 22 | 6.16 | 5.16  | 9.62  | 12.42 | 6.16 | 8.97 | 7.16 | 7.16 | 14.73 |
| 23 | 5.85 | 9.93  | 10.07 | 6.58  | 5.34 | 3.83 | 1.72 | 7.93 | 7.63  |
| 24 | 6.54 | 9.67  | 9.85  | 6.66  | 6.29 | 4.12 | 3.54 | 7.43 | 8.54  |
| 25 | 8    | 9.05  | 11.04 | 7.92  | 6.39 | 3.77 | 4.77 | 6.18 | 11.01 |
| 26 | 8.44 | 8.73  | 10.9  | 8.78  | 6.26 | 4.99 | 5.3  | 6.3  | 11.86 |
| 27 | 9.1  | 9.19  | 9.91  | 7.54  | 6.97 | 4.79 | 4.86 | 4.71 | 12.52 |
| 28 | 3.32 | 7.15  | 8.92  | 8.3   | 8.14 | 8.35 | 7.87 | 5.75 | 8.56  |
| 29 | 1.86 | 7.33  | 8.79  | 8.24  | 8.45 | 8.65 | 8.08 | 5.38 | 8.39  |
| 30 | 1.77 | 7.05  | 8.54  | 7.23  | 8.51 | 7.79 | 7.47 | 5.23 | 8.26  |
| 31 | 7.54 | 8.9   | 8.86  | 5.92  | 6.12 | 3.33 | 3.33 | 6.37 | 10.35 |
| 32 | 9.73 | 8.5   | 8.28  | 6.42  | 8.25 | 2.91 | 4.4  | 5.21 | 10.46 |
| 33 | 8.28 | 8.78  | 9.91  | 6.71  | 7.34 | 3.28 | 4.28 | 6.41 | 10.01 |
| 34 | 9.57 | 8.18  | 7.93  | 5.88  | 7.74 | 3.86 | 4.4  | 4.55 | 11.18 |
| 35 | 1.45 | 6.75  | 8.07  | 7.19  | 7.27 | 7.38 | 6.91 | 5.66 | 8.09  |
| 36 | 3.71 | 6.52  | 8.22  | 6.54  | 7.46 | 6.4  | 7.12 | 5.01 | 7.23  |
| 37 | 4.3  | 6.56  | 8.21  | 7.06  | 7.31 | 7.38 | 7.04 | 5.61 | 7.06  |
| 38 | 0    | 7.34  | 8.65  | 7.25  | 7.8  | 8.43 | 6.89 | 6.12 | 7.71  |
| 39 | 1.34 | 6.95  | 7.86  | 6.92  | 7.58 | 7.54 | 6.92 | 5.58 | 6.42  |
| 40 | 3.1  | 6.74  | 7.81  | 6.38  | 7.31 | 6.8  | 6.98 | 4.68 | 7.16  |
| 41 | 4.01 | 6.88  | 7.66  | 6.58  | 7.59 | 6.86 | 6.94 | 5.22 | 7.09  |
| 42 | 2.41 | 7.73  | 8.7   | 6.22  | 5.22 | 8.85 | 4.73 | 7.66 | 9.26  |
| 43 | 1.06 | 7.74  | 8.79  | 8.08  | 8.4  | 8.2  | 8.03 | 5.7  | 8.18  |
| 44 | 0.91 | 7.8   | 9.18  | 8.16  | 8.61 | 8.28 | 8.41 | 6.38 | 7.79  |
| 45 | 4.87 | 7.86  | 9.9   | 7.95  | 7.69 | 7.74 | 7.57 | 7.6  | 7.58  |
| 46 | 2.92 | 7.71  | 9.08  | 7.96  | 8.32 | 7.93 | 7.7  | 6.3  | 8.04  |
| 47 | 4.88 | 7.83  | 8.98  | 7.79  | 7.97 | 7.65 | 6.84 | 6.31 | 9.31  |
| 48 | 3.88 | 7.7   | 8.94  | 8.02  | 8.77 | 8.12 | 7.35 | 5.88 | 7.89  |
| 49 | 1.71 | 7.87  | 9.06  | 7.21  | 8.95 | 7.45 | 7.28 | 5.79 | 6.94  |
| 50 | 2.71 | 8.43  | 8.98  | 7.87  | 8.63 | 8.57 | 7.03 | 6.26 | 9.04  |
| 51 | 5.37 | 9.19  | 8.65  | 6.6   | 8.14 | 5.74 | 6.29 | 4.96 | 8.78  |
| 52 | 6.78 | 9.5   | 8.68  | 6.66  | 8.36 | 5.77 | 5.58 | 4.2  | 8.96  |
| 53 | 6.8  | 9.52  | 8.42  | 7.35  | 8.34 | 7.06 | 6.06 | 4.74 | 8.79  |

|    |      |       |       |       |      |      |      |       |       |
|----|------|-------|-------|-------|------|------|------|-------|-------|
| 1  |      |       |       |       |      |      |      |       |       |
| 2  | 5.48 | 9.58  | 8.77  | 7.01  | 8.09 | 7.42 | 6    | 5.36  | 8.36  |
| 3  | 7.68 | 10.31 | 8.9   | 7.54  | 7.63 | 7.12 | 6.3  | 7.04  | 10.17 |
| 4  | 8.74 | 10.25 | 9.87  | 7.74  | 8.12 | 7.23 | 6.3  | 9.02  | 9.63  |
| 5  | 8.13 | 10.82 | 8.74  | 7.86  | 7.82 | 6.95 | 6.13 | 6.65  | 9.06  |
| 6  | 7.65 | 10.74 | 8.92  | 7.8   | 7.61 | 7.19 | 5.85 | 6.63  | 8.99  |
| 7  | 7.19 | 9.46  | 9.87  | 6.82  | 8.1  | 7.05 | 6.16 | 5.38  | 10.09 |
| 8  | 8.19 | 10.36 | 10.65 | 7.65  | 8.16 | 5.65 | 5.16 | 7.05  | 10.08 |
| 9  | 7.51 | 10.69 | 10.45 | 6.71  | 8.13 | 5.07 | 4.73 | 6.79  | 9.15  |
| 10 | 9.21 | 9.52  | 9.26  | 8.14  | 8.98 | 6.03 | 6.65 | 5.44  | 10.86 |
| 11 | 8.04 | 9.31  | 11.62 | 7.92  | 7.26 | 6.62 | 4.35 | 8.02  | 11.31 |
| 12 | 9.01 | 9.27  | 10.66 | 8.22  | 8    | 6.69 | 5.29 | 6.23  | 10.89 |
| 13 | 9.36 | 9.24  | 10.82 | 8.12  | 7.91 | 6.74 | 4.38 | 6.57  | 11.03 |
| 14 | 9.09 | 9.2   | 11.24 | 8.21  | 7.88 | 6.46 | 5.06 | 6.99  | 10.51 |
| 15 | 6.52 | 9.66  | 9.83  | 6.83  | 7    | 5.8  | 5.78 | 7.64  | 9.52  |
| 16 | 8.26 | 10.23 | 10.45 | 7.25  | 6.37 | 1.83 | 3.21 | 7.94  | 9.08  |
| 17 | 8.99 | 8.63  | 9.07  | 7.93  | 7.91 | 5.9  | 6.62 | 6.17  | 11.39 |
| 18 | 7.23 | 9.22  | 8.27  | 6.47  | 7.16 | 4.32 | 4.45 | 3.7   | 10.23 |
| 19 | 9.78 | 9.9   | 9.96  | 6.5   | 7.85 | 2.99 | 4.25 | 7.24  | 9.79  |
| 20 | 10.3 | 9.36  | 9.12  | 6.84  | 9.65 | 3.1  | 5.65 | 6.13  | 10.53 |
| 21 | 7.03 | 10.02 | 9.22  | 6.4   | 7.22 | 3.84 | 1.93 | 6.56  | 9.49  |
| 22 | 8.03 | 9.96  | 10.4  | 6.68  | 7.3  | 5.04 | 3.13 | 2.71  | 10.11 |
| 23 | 6.99 | 10.16 | 10.65 | 6.6   | 6.18 | 2.8  | 2.8  | 3.06  | 8.55  |
| 24 | 7.35 | 8.76  | 9.66  | 7.76  | 7.82 | 6.46 | 6.75 | 8.78  | 9.69  |
| 25 | 7.18 | 8.9   | 9.81  | 7.94  | 7.53 | 5.79 | 6.14 | 9.29  | 9.79  |
| 26 | 8.61 | 7.67  | 10.73 | 10.14 | 8.15 | 8.06 | 6.96 | 10.87 | 12.84 |
| 27 | 4.68 | 8.71  | 9.42  | 5.17  | 6.45 | 3.82 | 1.36 | 0.36  | 7.92  |
| 28 | 6.08 | 9.2   | 9.5   | 5.31  | 7.39 | 5.55 | 4.25 | 6.15  | 7.11  |
| 29 | 6.56 | 9.07  | 10.3  | 4.52  | 7.05 | 5.67 | 1.76 | 3.22  | 7.87  |
| 30 | 8.15 | 8.07  | 9.73  | 1.9   | 9.6  | 4.71 | 4.48 | 3.48  | 8.39  |
| 31 | 1.76 | 6.62  | 7.69  | 7.01  | 7.4  | 7.57 | 7.22 | 5.08  | 6.8   |
| 32 | 5.42 | 6.81  | 8.15  | 6.74  | 7.16 | 6.91 | 6.39 | 4.89  | 8.14  |
| 33 | 2.88 | 6.56  | 7.84  | 7.01  | 7.51 | 7.31 | 7.17 | 4.79  | 6.5   |
| 34 | 2.54 | 6.86  | 7.96  | 6.71  | 7.54 | 7.45 | 7.26 | 4.54  | 7.2   |
| 35 | 4.53 | 8.19  | 8.32  | 6.55  | 6.58 | 5.38 | 5.59 | 7.66  | 7.96  |
| 36 | 4.95 | 7.74  | 7.9   | 6.91  | 6.83 | 6.25 | 6.25 | 7.14  | 7.77  |
| 37 | 6.45 | 7.53  | 7.59  | 6.11  | 7.09 | 5.96 | 6.11 | 6.43  | 8.38  |
| 38 | 6.97 | 7.3   | 7.32  | 6.19  | 7.04 | 5.77 | 5.88 | 6.22  | 9.69  |
| 39 | 2.94 | 9.05  | 3.16  | 6.44  | 6.69 | 4.35 | 1.94 | 3.16  | 6.92  |
| 40 | 6.85 | 9.29  | 10.69 | 7.53  | 7.59 | 6.59 | 5.05 | 7.34  | 9.36  |
| 41 | 6.09 | 10.32 | 10.68 | 7.05  | 7.66 | 2.74 | 2.42 | 8.85  | 8.58  |
| 42 | 6.55 | 9     | 10.83 | 9.24  | 7.23 | 5.69 | 4.55 | 8.21  | 11.88 |
| 43 | 6.13 | 8.97  | 9.6   | 7.01  | 7.42 | 7.35 | 5.83 | 7.3   | 9.46  |
| 44 | 7.83 | 8.51  | 10.74 | 9.21  | 6.83 | 6.51 | 6.1  | 7.51  | 12.11 |
| 45 | 8.52 | 9.51  | 9.89  | 6.94  | 7.86 | 3.04 | 4.68 | 7.4   | 9.87  |
| 46 | 9.88 | 9.46  | 9.5   | 7.01  | 8.46 | 2.94 | 4.89 | 6.16  | 10.77 |
| 47 | 1.68 | 10.37 | 10.02 | 7.22  | 7.54 | 1.68 | 0.68 | 3.68  | 7.73  |
| 48 | 7.88 | 9.61  | 9.09  | 7.73  | 8.44 | 6.64 | 4.94 | 3.57  | 9.03  |
| 49 | 7.11 | 9.97  | 8.85  | 6.83  | 8.55 | 4.67 | 3.86 | 2.28  | 8.46  |
| 50 | 7.43 | 9.52  | 8.46  | 7.16  | 9.05 | 7.1  | 6.34 | 3.84  | 8.36  |
| 51 | 5.06 | 8.93  | 8.6   | 6.16  | 7.01 | 3.16 | 1.89 | 6.49  | 9.83  |
| 52 | 7.45 | 8.74  | 8.04  | 5.99  | 7.51 | 6.26 | 4.78 | 6.66  | 8.65  |
| 53 | 6.97 | 8.22  | 8.08  | 6.19  | 6.94 | 6.42 | 5.54 | 6.42  | 8.78  |

<https://mc.manuscriptcentral.com/gut>

1  
2  
3  
4  
5  
6  
7  
8  
9  
10  
11  
12  
13  
14  
15  
16  
17  
18  
19  
20  
21  
22  
23  
24  
25  
26  
27  
28  
29  
30  
31  
32  
33  
34  
35  
36  
37  
38  
39  
40  
41  
42  
43  
44  
45  
46  
47  
48  
49  
50  
51  
52  
53  
54  
55  
56  
57  
58  
59  
60

|      |      |       |       |      |      |      |      |       |
|------|------|-------|-------|------|------|------|------|-------|
| 8.54 | 8.18 | 8.08  | 6.6   | 7.58 | 3.11 | 4.49 | 7.27 | 9.13  |
| 7.21 | 7.49 | 10.21 | 6.49  | 7.05 | 7.1  | 5.62 | 4.42 | 11.03 |
| 7    | 7.97 | 10.18 | 6.29  | 7.39 | 6.05 | 4.59 | 2.17 | 8.21  |
| 6.72 | 8.18 | 10.31 | 6.42  | 7.42 | 6.1  | 3.66 | 2.49 | 8.23  |
| 5.01 | 5.8  | 8.97  | 8.44  | 7.72 | 7.96 | 7.31 | 4.36 | 10.1  |
| 5.59 | 9.05 | 8.75  | 5.32  | 8.19 | 3.15 | 2.57 | 4.21 | 9.13  |
| 4.11 | 9.02 | 9.42  | 5.56  | 7.93 | 3.71 | 2.39 | 4.28 | 7.49  |
| 3.44 | 9.01 | 9.4   | 5.58  | 8.14 | 2.52 | 1.94 | 4.71 | 7.17  |
| 1.27 | 6.68 | 8.32  | 7.15  | 7.79 | 7.68 | 7.33 | 5.4  | 7.05  |
| 6.76 | 7.78 | 8.85  | 6.75  | 7.9  | 6.72 | 6.81 | 7.35 | 8.33  |
| 7.29 | 8.77 | 9.25  | 6.3   | 6.5  | 4.24 | 3.9  | 6.96 | 11.01 |
| 8.5  | 8.97 | 9.28  | 6.5   | 7.9  | 6.14 | 5.89 | 6.25 | 9.67  |
| 8.7  | 8.83 | 9.05  | 6.83  | 7.86 | 5.39 | 4.83 | 6.71 | 10.17 |
| 9.23 | 8.57 | 8.3   | 6.57  | 7.54 | 6.73 | 5.34 | 4.93 | 10.72 |
| 7.13 | 7.9  | 11.51 | 10.32 | 2.54 | 5.87 | 4.13 | 8.61 | 13.01 |
| 5.63 | 9.15 | 7.84  | 6.21  | 6.86 | 5.09 | 3.12 | 4.61 | 8.32  |
| 5.32 | 9.11 | 8.12  | 6.21  | 7.5  | 5.92 | 4.91 | 5.57 | 7.6   |
| 6.06 | 9.08 | 7.69  | 6.68  | 6.38 | 5.4  | 2.75 | 4.45 | 8.56  |

1  
2  
3  
4  
5  
6  
7  
8  
9  
10  
11  
12  
13  
14  
15  
16  
17  
18  
19  
20  
21  
22  
23  
24  
25  
26  
27  
28  
29  
30  
31  
32  
33  
34  
35  
36  
37  
38  
39  
40  
41  
42  
43  
44  
45  
46  
47  
48  
49  
50  
51  
52  
53  
54  
55  
56  
57  
58  
59  
60

| BICC1 | BMP4 | BMP5 | BMP7  | BMPER | BMPR1A | BMPR1B | BMPR2 | BNC2 |
|-------|------|------|-------|-------|--------|--------|-------|------|
| 4.88  | 6.86 | 6.43 | 2.73  | 3.26  | 8.85   | 6.93   | 7.04  | 5.99 |
| 4.16  | 8.03 | 6.99 | 6.14  | 2.42  | 8.85   | 6.26   | 7.8   | 5.23 |
| 4.17  | 7.79 | 6.76 | 6.57  | 2.08  | 8.84   | 6.54   | 7.7   | 5.86 |
| 5.18  | 8.31 | 3.99 | 6.5   | 4.09  | 9.31   | 4.27   | 8.92  | 5.35 |
| 2.59  | 7.92 | 8.09 | 3.33  | 3.33  | 9.89   | 8.25   | 2.01  | 8.18 |
| 5.22  | 6.93 | 5.97 | 6.52  | 1.49  | 8.43   | 6.96   | 8.04  | 6.31 |
| 4.62  | 7.02 | 5.92 | 6.55  | 2.5   | 8.42   | 7.02   | 7.98  | 6.39 |
| 4.98  | 6.33 | 2.98 | 8.09  | 4.1   | 8.73   | 7.04   | 9.45  | 4.64 |
| 4.17  | 4.95 | 1.37 | 1.95  | 2.69  | 7.79   | 3.69   | 8.67  | 4.83 |
| 5.46  | 7.28 | 5.55 | 1.49  | 1.49  | 8.47   | 6.28   | 7.59  | 5.19 |
| 4.55  | 6.86 | 1.38 | 4.08  | 3.96  | 8.07   | 3.84   | 8.15  | 4.19 |
| 5.27  | 6.54 | 2.68 | 0.68  | 4.27  | 8.4    | 5.33   | 8.37  | 5.49 |
| 4.71  | 9.49 | 6.08 | 4.97  | 2.51  | 8.68   | 6.33   | 7.41  | 6.02 |
| 5.48  | 9.37 | 5.96 | 7.17  | 3.26  | 9.04   | 6.67   | 7.77  | 6.37 |
| 5.09  | 8.9  | 1.77 | 10.35 | 5.09  | 10.52  | 3.77   | 9.19  | 4.35 |
| 5.34  | 7.34 | 5.99 | 7.56  | 4.53  | 8.9    | 7.17   | 8.13  | 6.03 |
| 6.15  | 7.99 | 6.29 | 7.07  | 4.29  | 9.18   | 7.46   | 8.17  | 6.42 |
| 6.35  | 7.73 | 5.93 | 6.62  | 1.76  | 9.49   | 7.15   | 8.46  | 6.85 |
| 4.07  | 5.57 | 2.7  | 1.9   | 3.98  | 8.71   | 2.7    | 9.03  | 4.54 |
| 5.29  | 6.91 | 4.89 | 4.63  | 3.89  | 8.46   | 3.01   | 8.96  | 4.98 |
| 5.02  | 6.51 | 3.08 | 1.5   | 3.67  | 8.81   | 3.67   | 8.88  | 6.04 |
| 6.34  | 8.83 | 2.47 | 8.91  | 4.32  | 9.25   | 6.38   | 8.82  | 5.93 |
| 5.66  | 8.51 | 3.2  | 9.52  | 4.29  | 9.37   | 4.45   | 8.8   | 4.95 |
| 6.46  | 8.69 | 4.94 | 8.52  | 4.7   | 9.54   | 5.65   | 9.05  | 6.27 |
| 4.6   | 5.38 | 2.01 | 7.89  | 5.18  | 8.7    | 3.23   | 7.38  | 4.67 |
| 3.13  | 6.96 | 5.04 | 6.64  | 3.71  | 8.56   | 2.13   | 7.75  | 3.3  |
| 3.11  | 7.49 | 5.11 | 6.86  | 2.84  | 8.69   | 3.52   | 7.92  | 2.52 |
| 3.5   | 7.62 | 6.18 | 5.59  | 2.92  | 8.88   | 5.94   | 7.63  | 5.2  |
| 0.7   | 8.34 | 6.17 | 1.7   | 3.16  | 9.15   | 6.47   | 7.24  | 5.09 |
| 3.09  | 7.57 | 6.06 | 2.09  | 3.36  | 9.07   | 7.15   | 7.67  | 5.73 |
| 3.2   | 8.4  | 5.78 | 2.78  | 2.2   | 9.4    | 6.62   | 7.7   | 5.33 |
| 3.03  | 7.97 | 6.84 | 2.29  | 0.71  | 9.51   | 7.45   | 7.37  | 6.1  |
| 3.15  | 6.97 | 6.43 | 1.93  | 6.82  | 8.79   | 6.68   | 6.92  | 6.68 |
| 6.04  | 7.25 | 3.52 | 8     | 3.38  | 8.78   | 4.81   | 9.1   | 5.49 |
| 4.9   | 7.41 | 4    | 7.44  | 2.61  | 8.54   | 3.2    | 8.26  | 4.37 |
| 5.86  | 6.6  | 2.79 | 7.98  | 3.93  | 8.94   | 4.93   | 8.88  | 5.06 |
| 3.9   | 4.62 | 2.45 | 2.03  | 3.77  | 7.69   | 0.45   | 7.6   | 3.62 |
| 4.69  | 7.44 | 1.73 | 2.57  | 2.21  | 7.73   | 3.8    | 7.75  | 4.16 |
| 4.17  | 6.61 | 3.83 | 2.69  | 3.17  | 7.87   | 4.61   | 7.78  | 4.17 |
| 4.07  | 6.07 | 3.33 | 0.74  | 4.14  | 8.07   | 4.79   | 7.61  | 4.79 |
| 3.9   | 6.56 | 6.14 | 1.1   | 1.83  | 8.18   | 6.51   | 7.11  | 5.66 |
| 4.42  | 6.8  | 6.27 | 2.9   | 1.9   | 8.36   | 6.63   | 6.89  | 6.05 |
| 3.8   | 6.41 | 6.28 | 3.22  | 2.8   | 8.12   | 6.64   | 6.76  | 5.68 |
| 4.4   | 6.15 | 5.4  | 3.27  | 1.82  | 7.77   | 6.15   | 7.38  | 5.24 |
| 2.86  | 5.67 | 4.45 | 8.69  | 4.86  | 8.32   | 4.45   | 9.01  | 2.86 |
| 4.77  | 7.46 | 4.96 | 4.77  | 3.77  | 7.94   | 4.48   | 7.81  | 4.22 |
| 5.55  | 7.16 | 3.46 | 5.09  | 3.7   | 7.79   | 4.46   | 8.08  | 4.39 |
| 7.08  | 7.19 | 3.13 | 4.33  | 3.71  | 8.27   | 5.79   | 8.48  | 5.96 |
| 4.54  | 8.91 | 4.09 | 8.88  | 3.22  | 8.7    | 4.8    | 9.12  | 4.96 |
| 5.5   | 8.35 | 1.01 | 8.92  | 2.01  | 8.36   | 4.47   | 8.86  | 4.71 |
| 4.74  | 8.11 | 4.74 | 9.54  | 2.82  | 8.79   | 3.5    | 9.05  | 4.3  |

<https://mc.manuscriptcentral.com/gut>

|    |      |       |      |      |      |       |      |      |      |
|----|------|-------|------|------|------|-------|------|------|------|
| 1  |      |       |      |      |      |       |      |      |      |
| 2  | 6.33 | 7.87  | 2.89 | 9.12 | 4.4  | 8.63  | 4.33 | 8.9  | 5.4  |
| 3  | 1.62 | 9     | 5.94 | 7.47 | 2.03 | 9.03  | 6.1  | 8.17 | 5.65 |
| 4  | 4.28 | 10.37 | 6.38 | 9.87 | 2.51 | 8.8   | 6.36 | 8.45 | 5.86 |
| 5  | 3.76 | 10.46 | 5.74 | 9.59 | 3.12 | 8.99  | 6.61 | 8.38 | 5.16 |
| 6  | 4.77 | 10.23 | 6.05 | 9.51 | 3.55 | 8.96  | 6.93 | 8.36 | 6.36 |
| 7  |      |       |      |      |      |       |      |      |      |
| 8  | 4.04 | 5.84  | 4.48 | 1.81 | 3.04 | 8.36  | 5.32 | 8.59 | 4.23 |
| 9  | 4.15 | 6.92  | 2.83 | 4.05 | 4.95 | 8.61  | 4.77 | 8.91 | 3.42 |
| 10 | 3    | 5.7   | 1.81 | 2.46 | 2.17 | 8.43  | 2.81 | 8.45 | 2.7  |
| 11 | 5.02 | 6.69  | 3.02 | 4.25 | 3.61 | 8.64  | 6.39 | 8.69 | 5.35 |
| 12 | 3.67 | 6.14  | 1.9  | 3.49 | 1.9  | 8.03  | 3.67 | 7.51 | 4.04 |
| 13 | 3.86 | 7.32  | 4.63 | 4.35 | 3.86 | 8.8   | 4.13 | 7.86 | 3.86 |
| 14 | 4.34 | 7.72  | 3.82 | 4.77 | 2.82 | 8.82  | 3.62 | 7.37 | 3.14 |
| 15 | 4.88 | 7.07  | 3.68 | 3.79 | 4.15 | 8.66  | 4.93 | 7.79 | 4.68 |
| 16 |      |       |      |      |      |       |      |      |      |
| 17 | 5.15 | 6.74  | 7.47 | 6.74 | 6.15 | 9.91  | 5.15 | 7.96 | 6.74 |
| 18 | 3.96 | 9.62  | 6.85 | 3.37 | 3.37 | 10.27 | 6.04 | 8.82 | 7.74 |
| 19 | 3.8  | 9.12  | 7.08 | 2.74 | 2.08 | 9.71  | 7.16 | 8.24 | 7.24 |
| 20 |      |       |      |      |      |       |      |      |      |
| 21 | 0.24 | 9.03  | 8.8  | 0.24 | 2.57 | 11.18 | 8.52 | 1.24 | 9.39 |
| 22 | 1.77 | 8.88  | 8.31 | 0.77 | 1.77 | 10.78 | 8.36 | 3.1  | 8.85 |
| 23 | 2.46 | 9.3   | 5.72 | 3.46 | 2.95 | 9.12  | 6.44 | 7.72 | 5.31 |
| 24 | 2.07 | 9.27  | 5.8  | 3.72 | 2.26 | 9.08  | 6.26 | 7.6  | 5.12 |
| 25 | 3.92 | 9.27  | 6.2  | 3.58 | 2.67 | 9.12  | 6.92 | 8.06 | 5.63 |
| 26 | 5.97 | 7.59  | 2.42 | 7.39 | 2.8  | 9.27  | 6.95 | 8.36 | 5.68 |
| 27 | 5.45 | 8.01  | 4.98 | 6.53 | 4.53 | 9.15  | 7.27 | 8.2  | 5.56 |
| 28 | 5.51 | 7.35  | 6.69 | 5.96 | 4.05 | 9.6   | 7.68 | 7.96 | 6.33 |
| 29 | 4.88 | 8.32  | 5.22 | 5.16 | 4.1  | 9.27  | 4.44 | 9.26 | 4.96 |
| 30 | 6.06 | 9.22  | 3.74 | 5.13 | 3.74 | 9.2   | 4.5  | 9.32 | 5.77 |
| 31 | 5.64 | 9.53  | 3.86 | 3.01 | 4.5  | 9.31  | 4.5  | 9.52 | 6.01 |
| 32 | 4.88 | 7.09  | 6.87 | 6.14 | 0.36 | 9.13  | 6.36 | 7.75 | 5.61 |
| 33 | 5.47 | 6.79  | 7.3  | 7.11 | 2.79 | 9.1   | 6.13 | 7.75 | 5.53 |
| 34 | 5.28 | 6.74  | 6.91 | 6.42 | 3.61 | 9.32  | 6.81 | 7.41 | 5.91 |
| 35 | 4.7  | 10.83 | 6.69 | 8.17 | 4.87 | 9.51  | 7.29 | 8.55 | 6.31 |
| 36 | 3.9  | 10.19 | 6.31 | 8.47 | 4.84 | 9.44  | 7.09 | 8.49 | 6.54 |
| 37 | 3.58 | 10.05 | 6.65 | 8.11 | 4.45 | 9.67  | 7.34 | 8.27 | 6.2  |
| 38 | 5.54 | 8.79  | 6.24 | 1.31 | 3.31 | 8.98  | 6.82 | 8.07 | 6.4  |
| 39 | 4.83 | 8.93  | 6.39 | 3.79 | 2.2  | 9.18  | 6.97 | 7.68 | 6.39 |
| 40 | 5.54 | 9.06  | 6.59 | 3.24 | 3.51 | 9.16  | 7    | 8    | 6.52 |
| 41 | 5.14 | 7.65  | 6.81 | 2.76 | 3.02 | 9.12  | 7.46 | 7.83 | 6.9  |
| 42 | 5.14 | 7.65  | 6.81 | 2.76 | 3.02 | 9.12  | 7.46 | 7.83 | 6.9  |
| 43 | 4.32 | 8.37  | 6.61 | 4.9  | 4.24 | 9.38  | 7.27 | 8.28 | 6.66 |
| 44 | 4.64 | 8.11  | 7.04 | 4.35 | 4.7  | 9.64  | 7.93 | 8.29 | 6.84 |
| 45 | 5.66 | 8.11  | 6.37 | 4.08 | 3.49 | 9.34  | 7.68 | 8.74 | 6.75 |
| 46 | 1.56 | 7.51  | 7.23 | 4.46 | 4.14 | 9.35  | 7.81 | 6.17 | 7.01 |
| 47 | 5.11 | 7.44  | 6.72 | 6.51 | 3.88 | 9.01  | 7.16 | 7.93 | 6.55 |
| 48 | 5.16 | 7.28  | 6.46 | 6.89 | 4.2  | 8.89  | 6.55 | 7.7  | 5.99 |
| 49 | 4.86 | 7.55  | 7.3  | 5    | 4.07 | 9.57  | 7.57 | 7.75 | 6.86 |
| 50 | 5.48 | 8.12  | 3.63 | 9.54 | 2.31 | 9.19  | 4.31 | 8.29 | 4.77 |
| 51 | 4.6  | 8.67  | 4.4  | 9.88 | 1.08 | 9.05  | 2.4  | 7.79 | 3.66 |
| 52 | 4.91 | 7.96  | 4.32 | 9.68 | 3.69 | 9.34  | 4.69 | 8.42 | 4.91 |
| 53 | 4.24 | 7.81  | 7.1  | 2.15 | 3.15 | 9.06  | 7.52 | 6.63 | 6.56 |
| 54 | 5.99 | 8.54  | 6.58 | 4.1  | 5.02 | 9.54  | 7.69 | 8.05 | 7.17 |
| 55 | 5.59 | 8.7   | 6.67 | 4.78 | 4.26 | 9.59  | 7.66 | 7.92 | 7.1  |
| 56 | 4.3  | 7.06  | 6.53 | 4.79 | 2.4  | 8.35  | 7.08 | 7.06 | 6.04 |

1  
2  
3  
4  
5  
6  
7  
8  
9  
10  
11  
12  
13  
14  
15  
16  
17  
18  
19  
20  
21  
22  
23  
24  
25  
26  
27  
28  
29  
30  
31  
32  
33  
34  
35  
36  
37  
38  
39  
40  
41  
42  
43  
44  
45  
46  
47  
48  
49  
50  
51  
52  
53  
54  
55  
56  
57  
58  
59  
60

|      |      |      |      |      |       |      |      |      |
|------|------|------|------|------|-------|------|------|------|
| 4.89 | 7.32 | 6.23 | 4.28 | 3.06 | 8.4   | 7.21 | 7.27 | 6.35 |
| 3.78 | 7.74 | 7.44 | 2.78 | 3.1  | 9.2   | 7.79 | 7.2  | 7.4  |
| 4.64 | 6.19 | 4.89 | 5.87 | 4.25 | 8.77  | 5.77 | 7.75 | 5.97 |
| 5.57 | 7.93 | 4.6  | 7.31 | 4.16 | 8.87  | 6.63 | 8.57 | 6.14 |
| 6.3  | 8.2  | 4.58 | 4.95 | 4.3  | 9.13  | 7.08 | 8.64 | 6.88 |
| 5.05 | 5.73 | 2.99 | 3.21 | 3.21 | 8.16  | 4.31 | 8.37 | 4.73 |
| 5.33 | 7.6  | 3.94 | 6.98 | 2.36 | 7.56  | 3.64 | 8.21 | 4.13 |
| 5.46 | 8.02 | 2.34 | 5.08 | 3.34 | 7.6   | 3.84 | 8.2  | 3.93 |
| 4.82 | 8.11 | 4.08 | 5.66 | 4.49 | 9.68  | 6.49 | 9.52 | 4.08 |
| 4.25 | 5.88 | 1.79 | 3.6  | 2.79 | 8.18  | 4.88 | 8.7  | 4.6  |
| 4.49 | 6.72 | 3.3  | 1.49 | 2.49 | 8.58  | 4.81 | 8.33 | 3.08 |
| 3.48 | 6.96 | 5.94 | 3.06 | 0    | 8.55  | 6.71 | 7.28 | 5.18 |
| 4.85 | 6.17 | 3.85 | 4.26 | 3.26 | 9.81  | 7.26 | 9.7  | 4.26 |
| 1.2  | 8.43 | 7.29 | 0    | 1.52 | 10.4  | 8.28 | 0.2  | 7.33 |
| 4.47 | 9.85 | 3.53 | 3.27 | 2.53 | 8.17  | 4.41 | 8    | 3.85 |
| 4.42 | 9.88 | 3.42 | 4.23 | 1.42 | 8.17  | 2.64 | 8.32 | 2.16 |
| 4.43 | 9.78 | 3.33 | 3.61 | 2.84 | 8.27  | 4.04 | 8.04 | 4.1  |
| 4.79 | 6.66 | 4.86 | 3.89 | 3.43 | 8.57  | 3.52 | 8.54 | 4.24 |
| 4.47 | 6.83 | 5.47 | 1.94 | 1.77 | 9.15  | 6.08 | 8.04 | 6.58 |
| 4.4  | 6.2  | 4.89 | 2.4  | 2.2  | 8.98  | 5.18 | 8.27 | 6.47 |
| 5.16 | 5.16 | 5.16 | 6.16 | 6.16 | 10.07 | 5.16 | 9.16 | 5.16 |
| 4.42 | 5.97 | 3.3  | 4.78 | 2.83 | 8.07  | 2.72 | 7.58 | 2.94 |
| 4.62 | 6.49 | 3.34 | 5.62 | 3.12 | 7.94  | 3.71 | 7.89 | 4.24 |
| 3.5  | 7.16 | 4.77 | 7.25 | 3.77 | 9.51  | 4.77 | 9.46 | 4.35 |
| 3.71 | 7.65 | 4.37 | 5.95 | 4.99 | 9.69  | 5.08 | 9.57 | 4.23 |
| 5.83 | 7.16 | 4.86 | 5.5  | 2.86 | 9.15  | 5.59 | 9.28 | 5.59 |
| 1    | 7.52 | 7.6  | 1    | 1    | 9.56  | 8.13 | 5    | 7.28 |
| 1.86 | 7.95 | 7.87 | 0.86 | 1.86 | 9.76  | 8.38 | 2.44 | 7.27 |
| 1.77 | 7.74 | 7.7  | 1.77 | 2.77 | 9.59  | 8.43 | 2.77 | 7.65 |
| 5.26 | 5.84 | 0.01 | 2.01 | 0.01 | 7.41  | 2.82 | 8.01 | 4.87 |
| 6.15 | 6.67 | 1.91 | 2.59 | 4.45 | 8.39  | 5.7  | 8.23 | 6.41 |
| 4.92 | 6.3  | 4.2  | 5.06 | 4.57 | 8.35  | 4.2  | 8.05 | 4.97 |
| 6.48 | 6.58 | 2.74 | 1.74 | 4.16 | 8.09  | 5.01 | 8.37 | 6.09 |
| 0.45 | 6.96 | 6.86 | 0.45 | 2.04 | 9.07  | 7.25 | 4.54 | 6.84 |
| 0.25 | 6.73 | 7.12 | 0.25 | 0.25 | 8.72  | 7.29 | 4.57 | 6.68 |
| 0.34 | 6.63 | 6.81 | 0.93 | 0    | 8.52  | 6.97 | 5.37 | 6.25 |
| 0    | 7.71 | 7.86 | 0    | 0    | 9.43  | 7.35 | 0.91 | 7.94 |
| 1.34 | 6.51 | 7.19 | 1.34 | 1.34 | 8.62  | 7.34 | 3.34 | 6.76 |
| 1.1  | 6.8  | 6.8  | 1.1  | 2.1  | 8.87  | 7.49 | 3.9  | 6.83 |
| 0.31 | 6.95 | 6.59 | 1.89 | 0.31 | 8.94  | 7.23 | 3.63 | 6.8  |
| 2.41 | 8.22 | 6.73 | 2.41 | 2.41 | 9.31  | 5.41 | 2.41 | 8.75 |
| 3.06 | 7.56 | 7.71 | 1.06 | 2.06 | 9.89  | 8.23 | 4.86 | 7.53 |
| 0.33 | 8.23 | 8.13 | 0    | 1.33 | 10.12 | 8.74 | 0.33 | 7.85 |
| 0.87 | 7.31 | 7.12 | 0.87 | 1.87 | 9.27  | 7.61 | 6.6  | 6.7  |
| 0.75 | 7.86 | 7.82 | 0.75 | 1.75 | 9.72  | 8.13 | 4.84 | 7.64 |
| 3.11 | 7.67 | 7.25 | 4.25 | 3.21 | 9.16  | 7.42 | 6.93 | 6.87 |
| 1.3  | 7.89 | 8.27 | 4.46 | 2.3  | 9.52  | 7.88 | 5.05 | 7.41 |
| 2.29 | 7.94 | 8.47 | 1.71 | 2.71 | 9.59  | 8.06 | 0.71 | 7.43 |
| 0.9  | 8.27 | 8.27 | 3.07 | 1.48 | 9.8   | 7.71 | 4.9  | 8.09 |
| 3.82 | 7.56 | 6.12 | 0.91 | 0    | 8.55  | 6.71 | 7.02 | 6.91 |
| 4.14 | 7.74 | 5.58 | 3.33 | 2.07 | 8.15  | 7.06 | 7.09 | 6.63 |
| 3.74 | 7.74 | 5.46 | 0.04 | 1.62 | 8.59  | 7.12 | 7.04 | 6.76 |

<https://mc.manuscriptcentral.com/gut>

|    |      |      |      |      |      |       |      |       |      |
|----|------|------|------|------|------|-------|------|-------|------|
| 1  |      |      |      |      |      |       |      |       |      |
| 2  | 4.08 | 7.67 | 6.2  | 0.27 | 2.27 | 8.3   | 7.39 | 7.13  | 7.15 |
| 3  | 5.04 | 7.04 | 7.1  | 0.52 | 3.98 | 9.09  | 9.12 | 8.69  | 6.01 |
| 4  | 5.21 | 7.89 | 7.78 | 5.38 | 4.18 | 9.2   | 8.82 | 8.51  | 6.52 |
| 5  | 1.74 | 6.65 | 7.4  | 0.74 | 3.33 | 9.43  | 9.54 | 8.33  | 6.3  |
| 6  | 3.48 | 6.58 | 6.96 | 0.95 | 1.54 | 9.42  | 9.54 | 8.51  | 5.94 |
| 7  | 4.89 | 7.47 | 6.56 | 2.57 | 3.09 | 9.18  | 7.05 | 8.26  | 6.93 |
| 8  | 5.16 | 7.61 | 3.84 | 5.8  | 4.84 | 9.07  | 4.84 | 8.86  | 5.7  |
| 9  | 4.07 | 7.62 | 4.79 | 7.06 | 4.23 | 8.55  | 5.07 | 8.56  | 5.59 |
| 10 | 5.27 | 7.84 | 4.2  | 4.06 | 6.47 | 10.15 | 6.65 | 9.11  | 6.83 |
| 11 | 5.09 | 7.36 | 5.16 | 3.35 | 2.35 | 8.83  | 5.81 | 9.28  | 5.35 |
| 12 | 6.05 | 7.77 | 5.34 | 5.52 | 2.75 | 9.16  | 6.52 | 9.38  | 5.75 |
| 13 | 6.36 | 7.65 | 4.29 | 4.84 | 2.97 | 9.09  | 7.13 | 9.41  | 6.06 |
| 14 | 5.39 | 7.1  | 4.52 | 5.15 | 3.65 | 9.21  | 6.75 | 9.5   | 5.56 |
| 15 | 5.89 | 6.45 | 5.38 | 3.06 | 2.48 | 8.66  | 6.25 | 7.93  | 6.06 |
| 16 | 6    | 7.02 | 3.09 | 7.02 | 2.68 | 8.27  | 3.42 | 8.35  | 4.6  |
| 17 | 5.6  | 7.18 | 5.47 | 4.67 | 5.67 | 9.7   | 6.97 | 8.44  | 6.45 |
| 18 | 5.32 | 7.2  | 2    | 3.45 | 6.49 | 8.13  | 3.17 | 8.26  | 5.39 |
| 19 | 5.25 | 8.41 | 4.91 | 5.62 | 3.25 | 8.63  | 3.47 | 8.31  | 5.52 |
| 20 | 5.47 | 8.25 | 2.52 | 4.33 | 5.65 | 9.35  | 6.35 | 8.85  | 6.71 |
| 21 | 4.74 | 7.47 | 1.93 | 5.29 | 2.51 | 8.14  | 2.51 | 8.21  | 4.97 |
| 22 | 5.5  | 8.86 | 2.35 | 7.16 | 2.35 | 8.65  | 3.63 | 8.18  | 5.07 |
| 23 | 4.29 | 9.58 | 3.39 | 9.59 | 3.39 | 8.62  | 2.48 | 8.48  | 3.06 |
| 24 | 4.91 | 7.85 | 6.06 | 6.23 | 2.11 | 8.71  | 7.33 | 8.29  | 5.86 |
| 25 | 3.74 | 7.75 | 6.68 | 5.88 | 2.51 | 8.43  | 6.71 | 8.35  | 5.32 |
| 26 | 5.47 | 7.32 | 5.15 | 6.32 | 6.47 | 10.63 | 7.96 | 10.05 | 6.32 |
| 27 | 3.82 | 4.82 | 1.36 | 3.36 | 2.36 | 7.03  | 1.95 | 6.84  | 2.68 |
| 28 | 4.49 | 6.96 | 5.55 | 4.6  | 4.25 | 7.87  | 3.79 | 6.84  | 4.6  |
| 29 | 4.52 | 6.53 | 4.57 | 4.46 | 1.35 | 7.42  | 2.76 | 7.11  | 3.67 |
| 30 | 5.07 | 7.26 | 3.9  | 2.9  | 5.6  | 8.34  | 4.71 | 7.83  | 6.81 |
| 31 | 1.76 | 7.08 | 7.08 | 1.76 | 1.76 | 9.12  | 7.34 | 1.76  | 6.22 |
| 32 | 0.72 | 6.91 | 6.79 | 3.72 | 0.72 | 8.7   | 6.72 | 5.04  | 5.85 |
| 33 | 0.88 | 7.17 | 7.17 | 0.88 | 1.88 | 9     | 7.33 | 1.88  | 6.56 |
| 34 | 1.96 | 6.81 | 7.11 | 1.96 | 3.28 | 8.84  | 7    | 2.96  | 6.24 |
| 35 | 2.68 | 5.77 | 5.34 | 0.36 | 1.94 | 7.78  | 6.13 | 6.07  | 4.61 |
| 36 | 1.98 | 6.96 | 5.75 | 2.47 | 2.25 | 8.41  | 6.58 | 6.05  | 5.44 |
| 37 | 3.94 | 6.78 | 5.83 | 1.35 | 1.35 | 8.43  | 6.48 | 6.73  | 5.88 |
| 38 | 4.56 | 6.36 | 5.4  | 0.17 | 2.87 | 8.25  | 6.66 | 6.89  | 5.71 |
| 39 | 4.05 | 5    | 3.68 | 1.94 | 4.52 | 6.92  | 1.94 | 7.27  | 3.68 |
| 40 | 4.46 | 7.85 | 5.55 | 7.11 | 3.46 | 9.37  | 5.55 | 8.39  | 5.16 |
| 41 | 3.23 | 6.91 | 3.74 | 6.17 | 3.42 | 8.66  | 2.74 | 8.52  | 3.42 |
| 42 | 3.23 | 6.88 | 3.23 | 5.23 | 3.82 | 9.72  | 3.23 | 9.2   | 4.55 |
| 43 | 4.72 | 6.07 | 5.45 | 5.7  | 1.91 | 8.72  | 6.49 | 8.03  | 5.26 |
| 44 | 6.83 | 5.51 | 5.51 | 6.83 | 4.51 | 10.07 | 4.51 | 9.15  | 6.1  |
| 45 | 5.36 | 7.53 | 4.82 | 6.06 | 4.39 | 8.18  | 5.45 | 8.57  | 5    |
| 46 | 5.84 | 7.81 | 1.94 | 1.52 | 5.22 | 8.69  | 6.39 | 8.93  | 5.49 |
| 47 | 2.27 | 7.07 | 1.68 | 6.17 | 2.27 | 8.05  | 1.68 | 7.35  | 2.68 |
| 48 | 3.57 | 6.79 | 5.38 | 5.38 | 3.57 | 8.79  | 5.07 | 7.71  | 4.89 |
| 49 | 4.8  | 7.02 | 4.74 | 6.23 | 2.86 | 8.25  | 4.36 | 7.79  | 4.74 |
| 50 | 3.58 | 7.2  | 5.47 | 5.11 | 4.26 | 8.78  | 6.86 | 7.22  | 5.61 |
| 51 | 4.48 | 5.16 | 0    | 8.04 | 2.16 | 7.64  | 5    | 7.65  | 3.57 |
| 52 | 5.17 | 6.53 | 5.28 | 6.9  | 3.85 | 8.58  | 5.89 | 7.54  | 5.53 |
| 53 | 4.74 | 6.49 | 5.54 | 6.48 | 2.83 | 8.4   | 6.04 | 7.43  | 5.33 |
| 54 |      |      |      |      |      |       |      |       |      |
| 55 |      |      |      |      |      |       |      |       |      |
| 56 |      |      |      |      |      |       |      |       |      |
| 57 |      |      |      |      |      |       |      |       |      |
| 58 |      |      |      |      |      |       |      |       |      |
| 59 |      |      |      |      |      |       |      |       |      |
| 60 |      |      |      |      |      |       |      |       |      |

|    |      |      |      |      |      |      |      |      |      |
|----|------|------|------|------|------|------|------|------|------|
| 1  | 4.25 | 5.43 | 4.6  | 6.81 | 5.6  | 9.33 | 6.22 | 8.34 | 5.31 |
| 2  | 4.27 | 6.53 | 4.42 | 5.68 | 2.1  | 8.13 | 5.1  | 7.84 | 4.27 |
| 3  | 4.05 | 7.2  | 4.91 | 6.81 | 3.17 | 8.19 | 4.67 | 7.2  | 3.76 |
| 4  | 4.39 | 7.6  | 4.49 | 6.91 | 2.07 | 7.96 | 4.07 | 7.43 | 2.49 |
| 5  | 2.55 | 6.14 | 6.76 | 6.36 | 3.55 | 9.36 | 7.78 | 6.76 | 5.8  |
| 6  | 4.27 | 8.12 | 0.57 | 5.12 | 1.57 | 7.02 | 3.27 | 7.47 | 3.15 |
| 7  | 2.97 | 7.17 | 0    | 1.07 | 1.07 | 7.06 | 2.65 | 7.2  | 2.97 |
| 8  | 2.52 | 7.78 | 0.35 | 2.16 | 1.35 | 7.13 | 1.67 | 7.19 | 3.26 |
| 9  | 0.27 | 7.61 | 7.07 | 0.27 | 0.27 | 9.21 | 7.89 | 1.27 | 6.75 |
| 10 | 3.82 | 7.2  | 6.56 | 3.77 | 2.55 | 8.78 | 7.03 | 6.65 | 6.41 |
| 11 | 5.63 | 6.62 | 1.97 | 1.24 | 1.24 | 7.83 | 4.05 | 8.33 | 4.97 |
| 12 | 5.35 | 7.62 | 6.38 | 4.21 | 4.7  | 8.47 | 6.1  | 7.96 | 5.93 |
| 13 | 4.89 | 7.96 | 6.06 | 4.76 | 4.69 | 8.94 | 4.76 | 8.4  | 5.3  |
| 14 | 6.54 | 7.51 | 4.88 | 1.13 | 3.13 | 8.56 | 5.91 | 8.15 | 5.62 |
| 15 | 2.54 | 3.54 | 2.54 | 4.54 | 4.87 | 9.45 | 3.54 | 8.97 | 2.54 |
| 16 | 3.89 | 6.26 | 3.61 | 6.98 | 3.26 | 8.05 | 5.05 | 7.47 | 4.44 |
| 17 | 3.88 | 6.47 | 5.44 | 6.27 | 3.14 | 8.21 | 5.77 | 6.69 | 5.71 |
| 18 | 4.21 | 6.09 | 3.45 | 6.99 | 2.92 | 8.11 | 5.34 | 7.52 | 4.28 |
| 19 |      |      |      |      |      |      |      |      |      |
| 20 |      |      |      |      |      |      |      |      |      |
| 21 |      |      |      |      |      |      |      |      |      |
| 22 |      |      |      |      |      |      |      |      |      |
| 23 |      |      |      |      |      |      |      |      |      |
| 24 |      |      |      |      |      |      |      |      |      |
| 25 |      |      |      |      |      |      |      |      |      |
| 26 |      |      |      |      |      |      |      |      |      |
| 27 |      |      |      |      |      |      |      |      |      |
| 28 |      |      |      |      |      |      |      |      |      |
| 29 |      |      |      |      |      |      |      |      |      |
| 30 |      |      |      |      |      |      |      |      |      |
| 31 |      |      |      |      |      |      |      |      |      |
| 32 |      |      |      |      |      |      |      |      |      |
| 33 |      |      |      |      |      |      |      |      |      |
| 34 |      |      |      |      |      |      |      |      |      |
| 35 |      |      |      |      |      |      |      |      |      |
| 36 |      |      |      |      |      |      |      |      |      |
| 37 |      |      |      |      |      |      |      |      |      |
| 38 |      |      |      |      |      |      |      |      |      |
| 39 |      |      |      |      |      |      |      |      |      |
| 40 |      |      |      |      |      |      |      |      |      |
| 41 |      |      |      |      |      |      |      |      |      |
| 42 |      |      |      |      |      |      |      |      |      |
| 43 |      |      |      |      |      |      |      |      |      |
| 44 |      |      |      |      |      |      |      |      |      |
| 45 |      |      |      |      |      |      |      |      |      |
| 46 |      |      |      |      |      |      |      |      |      |
| 47 |      |      |      |      |      |      |      |      |      |
| 48 |      |      |      |      |      |      |      |      |      |
| 49 |      |      |      |      |      |      |      |      |      |
| 50 |      |      |      |      |      |      |      |      |      |
| 51 |      |      |      |      |      |      |      |      |      |
| 52 |      |      |      |      |      |      |      |      |      |
| 53 |      |      |      |      |      |      |      |      |      |
| 54 |      |      |      |      |      |      |      |      |      |
| 55 |      |      |      |      |      |      |      |      |      |
| 56 |      |      |      |      |      |      |      |      |      |
| 57 |      |      |      |      |      |      |      |      |      |
| 58 |      |      |      |      |      |      |      |      |      |
| 59 |      |      |      |      |      |      |      |      |      |
| 60 |      |      |      |      |      |      |      |      |      |



1  
2  
3  
4  
5  
6  
7  
8  
9  
10  
11  
12  
13  
14  
15  
16  
17  
18  
19  
20  
21  
22  
23  
24  
25  
26  
27  
28  
29  
30  
31  
32  
33  
34  
35  
36  
37  
38  
39  
40  
41  
42  
43  
44  
45  
46  
47  
48  
49  
50  
51  
52  
53  
54  
55  
56  
57  
58  
59  
60

| BRMS1 | BTG1  | C1S   | C3    | C3AR1 | CADM1 | CALCRL | CALD1 | CAMK2A |
|-------|-------|-------|-------|-------|-------|--------|-------|--------|
| 6.68  | 10.43 | 8.81  | 10.37 | 7.89  | 7.08  | 7.46   | 8.97  | 6.46   |
| 7.27  | 9.9   | 8.15  | 8.42  | 7.81  | 6.86  | 8      | 9.7   | 5.84   |
| 7.25  | 9.6   | 8.07  | 7.73  | 7.61  | 7.03  | 7.73   | 9.07  | 5.94   |
| 7.62  | 10.45 | 9.61  | 9.59  | 7.62  | 6.22  | 8.82   | 10.3  | 3.18   |
| 3.33  | 8.43  | 6.37  | 7.03  | 8.31  | 8.91  | 7.4    | 7.74  | 8.1    |
| 6.66  | 10.05 | 9.27  | 9.22  | 7.44  | 7.46  | 7.23   | 10.26 | 6.36   |
| 6.79  | 10.41 | 8.86  | 9.15  | 7.88  | 7.4   | 7.09   | 10.15 | 5.96   |
| 7.83  | 10.99 | 9.51  | 9.76  | 7.59  | 7.08  | 7.19   | 9.97  | 3.56   |
| 8.35  | 10.32 | 9     | 8.9   | 8.58  | 6.86  | 7.08   | 9.94  | 2.37   |
| 7.32  | 8.95  | 8.61  | 8.98  | 7.2   | 6.21  | 6.46   | 9.73  | 5.64   |
| 8.41  | 9.89  | 8.8   | 8.45  | 6.96  | 5.9   | 7.02   | 10    | 1.38   |
| 8.22  | 9.89  | 9.79  | 10.12 | 7.59  | 5.81  | 8.12   | 10.8  | 2.27   |
| 7.28  | 8.74  | 8.57  | 8.77  | 7.12  | 6.45  | 7.25   | 9.12  | 6.12   |
| 7.37  | 9.27  | 9.47  | 9.09  | 7.66  | 6.89  | 8.07   | 10.14 | 6.07   |
| 8.21  | 11.03 | 9.13  | 10.24 | 7.52  | 8.07  | 8.4    | 8.07  | 4.77   |
| 7.43  | 10.49 | 8.83  | 9.2   | 7.67  | 7.11  | 7.79   | 9.82  | 6.75   |
| 7.72  | 9.57  | 9.38  | 9.45  | 7.68  | 7.68  | 7.61   | 10.33 | 6.5    |
| 7.49  | 9.49  | 9.1   | 8.5   | 7.38  | 7.69  | 7.01   | 10.11 | 6.99   |
| 8.22  | 12.02 | 9.17  | 9.71  | 7.36  | 6.07  | 7.95   | 8.88  | 2.7    |
| 8.23  | 10.93 | 9.65  | 11.1  | 7.29  | 7.13  | 8.69   | 10.55 | 0      |
| 8.12  | 11.5  | 9.9   | 11.21 | 7.77  | 7.17  | 8.69   | 10.74 | 3.75   |
| 8.45  | 10.55 | 10.02 | 9.51  | 7.5   | 7.55  | 8.06   | 11.78 | 2.96   |
| 8.4   | 10.75 | 10    | 8.86  | 7.32  | 8.04  | 7.85   | 11.24 | 1.78   |
| 8.32  | 10.55 | 10.42 | 9.71  | 7.67  | 7.93  | 7.9    | 12.39 | 2.22   |
| 9.08  | 9.73  | 8.06  | 8.55  | 7.04  | 9.31  | 6.13   | 9.67  | 2.75   |
| 9.81  | 10.02 | 7.94  | 8.62  | 6.67  | 5.3   | 7.47   | 9.21  | 1.71   |
| 9.61  | 10.07 | 7.75  | 8.85  | 6.56  | 5.11  | 7.29   | 9.05  | 2.52   |
| 8.53  | 10.06 | 7.75  | 8.28  | 7.45  | 6.74  | 7.47   | 8.66  | 5.96   |
| 8.16  | 9.54  | 6.64  | 6.64  | 6.86  | 6.73  | 6.48   | 8.72  | 6.09   |
| 7.66  | 9.57  | 8.35  | 8.25  | 7.67  | 7.09  | 7.61   | 9.39  | 6.34   |
| 7.98  | 9.44  | 7.7   | 7.77  | 7.15  | 7.11  | 7.45   | 9.4   | 5.84   |
| 7.76  | 9.47  | 7.76  | 7.42  | 7.92  | 7.58  | 7.58   | 8.71  | 6.75   |
| 6.47  | 11.43 | 8.3   | 8.66  | 7.61  | 7.82  | 7.42   | 8.15  | 6.75   |
| 7.85  | 9.92  | 10.1  | 10.82 | 8.1   | 6.76  | 8.13   | 11.61 | 3.23   |
| 8.4   | 10.18 | 9.14  | 10.15 | 7.42  | 6.04  | 7.69   | 10.69 | 0.61   |
| 8.09  | 10.21 | 9.81  | 10.71 | 7.59  | 6.3   | 8.19   | 11.03 | 0.47   |
| 7.57  | 10.97 | 7.98  | 9.47  | 8.13  | 5.35  | 6.51   | 7.87  | 2.45   |
| 7.69  | 9.97  | 8.95  | 9.31  | 8.28  | 5.57  | 6.88   | 8.56  | 2.4    |
| 6.94  | 10.33 | 9.52  | 10.68 | 7.94  | 5.54  | 6.79   | 8.52  | 3.95   |
| 7.05  | 10.41 | 9.52  | 10.02 | 8.38  | 5.07  | 6.71   | 9.02  | 2.74   |
| 6.17  | 9.27  | 8.12  | 8.59  | 7.06  | 6.71  | 7.15   | 9.11  | 6.47   |
| 6.54  | 8.63  | 8.33  | 8.31  | 7.21  | 7.15  | 6.91   | 9.31  | 6.27   |
| 6.37  | 8.7   | 8.1   | 8.04  | 7.01  | 6.89  | 6.56   | 8.97  | 6.26   |
| 6.58  | 9.15  | 8.53  | 8.42  | 6.62  | 6.4   | 5.92   | 9.51  | 5.6    |
| 8.59  | 10.57 | 6.32  | 5.18  | 5.86  | 7.32  | 4.86   | 6.45  | 3.86   |
| 8.14  | 10.08 | 9.15  | 9.05  | 6.62  | 6.42  | 7.15   | 9.46  | 1.31   |
| 8.08  | 9.84  | 9.79  | 10.18 | 6.74  | 6.11  | 7.96   | 10.1  | 1.58   |
| 7.6   | 9.68  | 10.29 | 10.44 | 7.06  | 6.13  | 8.01   | 11.04 | 1.81   |
| 8.24  | 10.37 | 9.68  | 10.12 | 8.55  | 6.47  | 7.68   | 10.05 | 2.22   |
| 8.66  | 10.22 | 10.45 | 9.89  | 8.16  | 5.62  | 8.03   | 10.48 | 1.01   |
| 8.68  | 10.82 | 9.87  | 8.92  | 8.08  | 6.28  | 7.3    | 9.88  | 2.08   |

<https://mc.manuscriptcentral.com/gut>

1  
2  
3  
4  
5  
6  
7  
8  
9  
10  
11  
12  
13  
14  
15  
16  
17  
18  
19  
20  
21  
22  
23  
24  
25  
26  
27  
28  
29  
30  
31  
32  
33  
34  
35  
36  
37  
38  
39  
40  
41  
42  
43  
44  
45  
46  
47  
48  
49  
50  
51  
52  
53  
54  
55  
56  
57  
58  
59  
60

|      |       |       |       |      |       |      |       |      |
|------|-------|-------|-------|------|-------|------|-------|------|
| 8.55 | 10.51 | 10.49 | 10.78 | 8.53 | 6.27  | 7.78 | 10.97 | 3.25 |
| 7.77 | 8.95  | 7.5   | 7.36  | 7.51 | 6.85  | 6.83 | 9.16  | 5.81 |
| 7.51 | 8.89  | 8.24  | 8.4   | 7.31 | 7.31  | 7.34 | 9.96  | 5.97 |
| 8.11 | 9.09  | 8.35  | 7.64  | 7.34 | 6.91  | 7.17 | 9.63  | 5.45 |
| 7.36 | 9.08  | 8.85  | 9.1   | 7.57 | 7.21  | 7.25 | 10.15 | 5.9  |
| 8.6  | 11.41 | 8.87  | 9.52  | 7.15 | 6.21  | 7.69 | 9.62  | 4.32 |
| 8.76 | 10.38 | 8.99  | 9.24  | 6.88 | 6.25  | 7.74 | 10.34 | 2.25 |
| 9.14 | 9.59  | 7.33  | 6.26  | 5.56 | 4.53  | 6.87 | 9.22  | 1.32 |
| 8.99 | 10.29 | 9.7   | 9.72  | 6.61 | 5.3   | 7.25 | 10.91 | 0.44 |
| 8.1  | 10.69 | 7.73  | 8.48  | 7.23 | 8.29  | 6.93 | 9.11  | 1.17 |
| 8.55 | 10.41 | 8.7   | 9     | 7.07 | 8.37  | 7.21 | 9.5   | 1.54 |
| 8.88 | 9.66  | 8.44  | 8.64  | 7.24 | 8.21  | 7.18 | 9.43  | 2.4  |
| 8.52 | 9.82  | 9.09  | 9.29  | 7.15 | 8.26  | 7.36 | 10.47 | 0    |
| 7.15 | 9.24  | 8.74  | 8.61  | 7.47 | 9.4   | 7.15 | 6.15  | 5.15 |
| 7.5  | 9.85  | 8.4   | 8.25  | 7.82 | 8.63  | 7.82 | 8.58  | 6.43 |
| 7.52 | 9.81  | 8.94  | 8.65  | 8.25 | 8.15  | 7.79 | 8.76  | 7    |
| 1.24 | 9.6   | 7.26  | 6.87  | 8.71 | 10.07 | 7.03 | 9.07  | 9.28 |
| 3.36 | 8.97  | 6.66  | 6.53  | 8.4  | 9.65  | 6.66 | 8.71  | 8.58 |
| 7.39 | 9.45  | 6.44  | 6.21  | 6.62 | 6.07  | 6.53 | 8.83  | 5.87 |
| 7.57 | 9.49  | 5.89  | 6.09  | 6.46 | 6.18  | 6.32 | 7.94  | 5.9  |
| 7.32 | 9.45  | 7.5   | 7.51  | 7.42 | 6.65  | 6.71 | 8.6   | 6.3  |
| 8.18 | 10.62 | 9.92  | 10.77 | 7.6  | 6.39  | 8.87 | 10.66 | 2.68 |
| 7.76 | 10.48 | 9.58  | 10.81 | 7.41 | 6.49  | 8.63 | 10.76 | 4.86 |
| 7.14 | 10.27 | 9.72  | 10.3  | 7.91 | 7.35  | 9.16 | 10.98 | 7.16 |
| 8.31 | 10.81 | 9.49  | 8.96  | 7.7  | 7.05  | 7.22 | 10.17 | 3.81 |
| 8.24 | 10.49 | 9.98  | 9.26  | 7.46 | 6.75  | 7.88 | 10.98 | 3.04 |
| 8.35 | 10.5  | 10.72 | 9.03  | 7.62 | 6.84  | 7.73 | 11.1  | 2.28 |
| 7.91 | 9.58  | 8.4   | 8.84  | 7.78 | 6.97  | 7.22 | 9.56  | 6.31 |
| 7.68 | 9.44  | 8.86  | 9.01  | 7.32 | 6.99  | 7.37 | 10.15 | 6    |
| 7.68 | 9.52  | 8.75  | 9.25  | 7.78 | 7.16  | 7.5  | 9.85  | 6.46 |
| 7.24 | 9.72  | 9.03  | 9.46  | 7.74 | 8.08  | 8.18 | 9.88  | 6.51 |
| 7.65 | 9.05  | 8.38  | 7.3   | 7.6  | 7.61  | 7.51 | 9.59  | 6.45 |
| 7.14 | 9.37  | 7.69  | 7.09  | 7.77 | 7.84  | 7.52 | 9.2   | 6.91 |
| 6.83 | 9.44  | 9.25  | 8.79  | 7.75 | 7.28  | 7.74 | 10.12 | 6.44 |
| 7.19 | 9.64  | 8.92  | 8.57  | 7.93 | 7.18  | 7.4  | 9.59  | 6.69 |
| 7.07 | 9.79  | 9.29  | 10.06 | 7.71 | 7.42  | 7.62 | 10.12 | 6.52 |
| 6.9  | 10.45 | 8.96  | 9.94  | 8.11 | 7.38  | 7.84 | 10.06 | 7.14 |
| 6.9  | 10.45 | 8.96  | 9.94  | 8.11 | 7.38  | 7.84 | 10.06 | 7.14 |
| 7.19 | 9.55  | 8.88  | 9.35  | 7.48 | 7.39  | 7.37 | 10.11 | 7.1  |
| 6.86 | 9.63  | 9.34  | 9.03  | 7.53 | 7.64  | 7.88 | 10.97 | 7.08 |
| 6.51 | 9.5   | 9.76  | 10.56 | 7.61 | 7.68  | 7.75 | 11.1  | 6.88 |
| 6.74 | 10.03 | 7.51  | 8.27  | 7.57 | 7.85  | 7.74 | 8.18  | 7.4  |
| 7.88 | 9.56  | 9.29  | 10.36 | 7.69 | 7.96  | 7.93 | 10.05 | 6.97 |
| 8.1  | 9.57  | 8.97  | 10.23 | 7.36 | 7.58  | 8.01 | 9.83  | 6.14 |
| 7.04 | 9.37  | 9.09  | 9.96  | 7.9  | 8.14  | 7.95 | 10.26 | 6.78 |
| 8.26 | 9.99  | 9.04  | 10.08 | 7.29 | 5.51  | 6.7  | 10.07 | 2.05 |
| 8.36 | 9.82  | 7.78  | 7.62  | 6.12 | 5.08  | 6.23 | 9.13  | 0.08 |
| 8.32 | 10.28 | 8.53  | 9.06  | 8.27 | 5.91  | 7.3  | 9.3   | 3.32 |
| 6.11 | 9.86  | 7.97  | 9.52  | 7.81 | 7.61  | 7.61 | 8.92  | 7.05 |
| 6.1  | 9.32  | 9.73  | 10.35 | 8.04 | 7.81  | 8.43 | 10.98 | 6.91 |
| 6.43 | 9.18  | 9.68  | 10.46 | 7.84 | 7.91  | 7.83 | 11.16 | 6.72 |
| 6.53 | 9.24  | 8.3   | 8.47  | 7.24 | 7.46  | 7.26 | 9.29  | 6.63 |

<https://mc.manuscriptcentral.com/gut>

|    |      |       |       |       |      |      |      |       |      |
|----|------|-------|-------|-------|------|------|------|-------|------|
| 1  |      |       |       |       |      |      |      |       |      |
| 2  | 6.43 | 9.31  | 8.9   | 9.15  | 7.12 | 7.09 | 7.26 | 10.03 | 6.28 |
| 3  | 5.33 | 8.79  | 7.91  | 7.43  | 7.67 | 8.24 | 7.04 | 9.01  | 7.61 |
| 4  | 7.22 | 11.5  | 9.05  | 9.04  | 7.46 | 6.87 | 6.5  | 9.85  | 5.33 |
| 5  | 7.58 | 10.82 | 9.95  | 9.93  | 7.65 | 7.08 | 7.84 | 10.88 | 4.6  |
| 6  | 7.2  | 10.52 | 10.75 | 10.87 | 8.16 | 7.34 | 7.85 | 11.76 | 4.19 |
| 7  | 7.94 | 10.99 | 8.66  | 9.79  | 7.56 | 6.08 | 7.53 | 9.49  | 3.21 |
| 8  | 7.81 | 9.37  | 8.21  | 8.34  | 6.68 | 5.81 | 6.97 | 9.97  | 1.87 |
| 9  | 8.08 | 9.44  | 8.63  | 8.91  | 6.81 | 6.11 | 7.52 | 10.35 | 1.34 |
| 10 | 7.7  | 10.53 | 7.82  | 8.49  | 7.95 | 6.4  | 6.49 | 8.17  | 5.08 |
| 11 | 7.55 | 11.7  | 8.13  | 8.28  | 7.48 | 5.18 | 7.1  | 9.02  | 1.79 |
| 12 | 8    | 10.39 | 8.66  | 9.11  | 6.22 | 5.58 | 5.88 | 9.32  | 0.49 |
| 13 | 7.01 | 9.93  | 8.2   | 8.12  | 7.47 | 7.07 | 6.95 | 8.76  | 5.48 |
| 14 | 8.02 | 10.75 | 8.35  | 8.19  | 6.96 | 6.43 | 6.96 | 8.02  | 5.26 |
| 15 | 1.52 | 8.64  | 6.98  | 6.36  | 8.86 | 8.84 | 8.14 | 7.41  | 8.04 |
| 16 | 7.63 | 8.97  | 7.9   | 5.99  | 6.34 | 5.53 | 7    | 10.03 | 4.03 |
| 17 | 7.9  | 9.4   | 7.54  | 6.04  | 5.62 | 4.79 | 7.36 | 9.99  | 0    |
| 18 | 7.49 | 9.23  | 8.12  | 7.21  | 6.3  | 5.35 | 7.25 | 10.03 | 3.52 |
| 19 | 7.43 | 9.97  | 9.57  | 10.26 | 7.61 | 6.29 | 6.46 | 9.9   | 1.76 |
| 20 | 6.58 | 9.11  | 9.08  | 9.79  | 7.28 | 7.19 | 5.98 | 9.65  | 6.41 |
| 21 | 6.93 | 9.93  | 9.39  | 10.2  | 7.8  | 6.75 | 6.3  | 10.04 | 5.59 |
| 22 | 6.75 | 10.07 | 5.16  | 6.16  | 6.75 | 7.97 | 6.75 | 6.75  | 6.16 |
| 23 | 8.33 | 9.77  | 7.82  | 8.55  | 6.24 | 6.2  | 6.73 | 9.08  | 2.72 |
| 24 | 7.99 | 10.37 | 8.94  | 9.76  | 7.6  | 6.49 | 7.54 | 9.24  | 2.86 |
| 25 | 7.85 | 10.93 | 8.79  | 8.25  | 6.47 | 7.13 | 7.09 | 9.07  | 2.77 |
| 26 | 7.79 | 11.09 | 8.82  | 8.61  | 6.81 | 6.4  | 8.29 | 9.22  | 3.23 |
| 27 | 7.59 | 10.56 | 9.82  | 11    | 7.93 | 7.39 | 8.44 | 10.77 | 2.13 |
| 28 | 5.08 | 8.34  | 6.39  | 6.72  | 8.47 | 8.04 | 7.52 | 7.08  | 7.63 |
| 29 | 2.86 | 8.15  | 6.07  | 6.9   | 8.23 | 8.25 | 7.82 | 7.28  | 8    |
| 30 | 4.09 | 7.81  | 6.09  | 6.94  | 8.05 | 8.03 | 7.41 | 7.19  | 7.72 |
| 31 | 5.94 | 9.67  | 9.29  | 9.9   | 6.89 | 5.01 | 7.66 | 10.26 | 0.01 |
| 32 | 6.66 | 9.04  | 9.88  | 9.7   | 6.44 | 5.7  | 8.05 | 11.35 | 2.59 |
| 33 | 6.78 | 9.32  | 8.95  | 9.13  | 6.26 | 5.54 | 7.69 | 10.25 | 2.11 |
| 34 | 6.11 | 9.83  | 10.12 | 11.71 | 6.66 | 5.55 | 8.71 | 11.15 | 2.96 |
| 35 | 3.91 | 8.14  | 5.7   | 6.26  | 7.42 | 7.77 | 6.04 | 6.68  | 7.51 |
| 36 | 3.71 | 7.17  | 5.06  | 5.78  | 7.26 | 7.19 | 6.68 | 6.46  | 6.68 |
| 37 | 4.51 | 7.27  | 5.67  | 5.57  | 6.94 | 6.97 | 6.26 | 6.41  | 6.7  |
| 38 | 0    | 7.85  | 5.77  | 6     | 7.56 | 8.55 | 5.75 | 8.09  | 7.82 |
| 39 | 1.34 | 7.6   | 5.66  | 6.42  | 7.27 | 7.31 | 7.19 | 6.86  | 7.22 |
| 40 | 1.1  | 7.7   | 5.35  | 5.62  | 7.42 | 7.73 | 7.36 | 6.85  | 7.36 |
| 41 | 1.31 | 7.3   | 5.89  | 6.04  | 7.02 | 7.59 | 7.47 | 6.79  | 6.88 |
| 42 | 3.41 | 7.46  | 6.5   | 4.41  | 5.87 | 9.55 | 2.41 | 9.22  | 5.58 |
| 43 | 4.64 | 8.45  | 6.1   | 6.91  | 8.27 | 8.4  | 7.71 | 7.59  | 8.03 |
| 44 | 3.13 | 8.55  | 6.37  | 6.97  | 8.66 | 8.65 | 8.06 | 7.62  | 8.5  |
| 45 | 6.77 | 8.38  | 6     | 6.39  | 7.77 | 7.55 | 7.28 | 6.77  | 7.12 |
| 46 | 4.79 | 8.29  | 6.41  | 6.7   | 8.16 | 8.3  | 7.66 | 7.46  | 7.62 |
| 47 | 5.99 | 8.97  | 7.44  | 7.84  | 7.64 | 7.48 | 8.03 | 7.7   | 7.11 |
| 48 | 5.15 | 8.21  | 6.48  | 6.82  | 8.18 | 7.73 | 8.46 | 6.88  | 7.79 |
| 49 | 1.71 | 8.51  | 6.23  | 6.88  | 8.14 | 8.02 | 8.51 | 7.2   | 7.34 |
| 50 | 3.8  | 8.58  | 6.68  | 7.25  | 8.03 | 8.78 | 7.64 | 8.33  | 7.68 |
| 51 | 6.99 | 8.87  | 8     | 8.81  | 7.37 | 7.22 | 7.13 | 9.12  | 5.37 |
| 52 | 7.42 | 9.24  | 7.86  | 8.22  | 7.55 | 6.98 | 6.99 | 9.42  | 5.33 |
| 53 | 7.67 | 9.33  | 7.93  | 8.51  | 7.53 | 7.01 | 7.32 | 9.32  | 6.06 |

<https://mc.manuscriptcentral.com/gut>

1  
2  
3  
4  
5  
6  
7  
8  
9  
10  
11  
12  
13  
14  
15  
16  
17  
18  
19  
20  
21  
22  
23  
24  
25  
26  
27  
28  
29  
30  
31  
32  
33  
34  
35  
36  
37  
38  
39  
40  
41  
42  
43  
44  
45  
46  
47  
48  
49  
50  
51  
52  
53  
54  
55  
56  
57  
58  
59  
60

|      |       |       |       |      |      |      |       |      |
|------|-------|-------|-------|------|------|------|-------|------|
| 7.04 | 9.45  | 8.16  | 9.27  | 7.66 | 7.06 | 7.27 | 9.25  | 6.08 |
| 7.63 | 10.15 | 9.12  | 11.03 | 8.05 | 7.99 | 7.87 | 10.42 | 6.01 |
| 7.52 | 10.24 | 9.16  | 9.55  | 7.76 | 8.08 | 7.92 | 10.27 | 6.25 |
| 8.18 | 9.71  | 8.06  | 10.57 | 6.83 | 7.56 | 7.2  | 9.25  | 6.67 |
| 8.09 | 9.72  | 8.17  | 10.7  | 7.44 | 7.86 | 7.37 | 9.29  | 6.48 |
| 7.65 | 10.68 | 9.38  | 10.75 | 7.96 | 8.46 | 7.17 | 9.99  | 6.91 |
| 8.8  | 10.54 | 9.64  | 10.36 | 8.23 | 7.16 | 7.56 | 9.62  | 4.3  |
| 8.46 | 10.04 | 9.58  | 10.28 | 7.99 | 6.53 | 7.34 | 9.74  | 3.15 |
| 8.57 | 10.9  | 10.36 | 10.74 | 8.32 | 7.25 | 7.9  | 10.89 | 4.44 |
| 8.37 | 11.45 | 9.29  | 8.82  | 8.18 | 7.22 | 7.89 | 10.84 | 5.01 |
| 7.98 | 10.78 | 10.1  | 9.43  | 8.31 | 7.52 | 8.38 | 11.27 | 5.21 |
| 8.08 | 10.85 | 10.18 | 9.95  | 8.7  | 7.46 | 7.78 | 11.41 | 5.29 |
| 8.23 | 10.9  | 9.68  | 8.64  | 8.11 | 7.07 | 7.88 | 11.22 | 4.71 |
| 7.75 | 10.24 | 8.91  | 10.63 | 8.07 | 6.49 | 6.86 | 9.81  | 5.56 |
| 8.28 | 10.45 | 9.93  | 11.51 | 7.88 | 6.28 | 7.45 | 10.06 | 2.32 |
| 6.93 | 10.31 | 9.72  | 10.41 | 8.07 | 7.44 | 7.54 | 10.39 | 6.03 |
| 7.2  | 11.13 | 9.87  | 10.33 | 8.05 | 6.24 | 8.18 | 10.32 | 1    |
| 7.6  | 10    | 9.45  | 9.05  | 7.86 | 6.22 | 7.73 | 10.45 | 0.67 |
| 7.35 | 9.94  | 10.26 | 9.82  | 8.23 | 6.84 | 8.49 | 11.91 | 2.52 |
| 8.44 | 10.7  | 9.31  | 10.2  | 6.93 | 4.57 | 7.3  | 9.97  | 0    |
| 8    | 9.96  | 9.55  | 8.81  | 6.36 | 5.77 | 6.74 | 10.95 | 1.54 |
| 8.04 | 8.93  | 8.11  | 7.54  | 5.29 | 5.18 | 6.43 | 9.65  | 0    |
| 7.08 | 10.11 | 9.36  | 9.45  | 7.81 | 7.23 | 7.78 | 10.2  | 6.06 |
| 7.53 | 9.95  | 9.46  | 8.98  | 7.48 | 7.04 | 7.6  | 10.14 | 6.21 |
| 8.36 | 10.54 | 9.17  | 8.77  | 7.47 | 7.54 | 7.54 | 9.06  | 5.96 |
| 6.45 | 10.37 | 8.3   | 9.02  | 6.51 | 6.82 | 5.92 | 8.55  | 0.36 |
| 5.88 | 9.57  | 9.06  | 8.86  | 6.84 | 7.53 | 7.25 | 9.6   | 4.7  |
| 6.67 | 8.77  | 8.26  | 8.66  | 6.98 | 7.21 | 6.66 | 9.5   | 3.85 |
| 6.85 | 8.77  | 9.29  | 10.4  | 7.48 | 7.54 | 7.9  | 11.05 | 1.9  |
| 4.34 | 7.46  | 5.76  | 6.15  | 7.34 | 7.59 | 7.12 | 6.28  | 7.08 |
| 5.18 | 7.09  | 5.93  | 5.97  | 7.21 | 7.18 | 6.55 | 6.55  | 6.87 |
| 3.47 | 7.36  | 5.88  | 6.21  | 7.26 | 7.68 | 6.99 | 6.24  | 7.28 |
| 4.28 | 7.35  | 5.42  | 5.54  | 7.35 | 7.72 | 6.86 | 6.42  | 6.91 |
| 6.22 | 9.26  | 7.06  | 8.81  | 6.9  | 6.29 | 6.29 | 7.92  | 5.55 |
| 5.44 | 8.47  | 7.63  | 8.03  | 6.85 | 6.78 | 6.56 | 8.2   | 6.33 |
| 5.16 | 8.25  | 8.31  | 8.73  | 7.1  | 6.81 | 7.11 | 9.05  | 6.01 |
| 5.34 | 8.48  | 8.8   | 9.79  | 7.3  | 6.52 | 6.98 | 9.29  | 5.77 |
| 7.5  | 12.89 | 8.68  | 9.48  | 6.21 | 5.85 | 7.3  | 8.11  | 0.35 |
| 7.75 | 10.08 | 9.08  | 8.06  | 6.51 | 6.99 | 6.59 | 10.09 | 5.37 |
| 8.49 | 10.58 | 8.93  | 8.76  | 7.43 | 5.94 | 7.19 | 9.07  | 2    |
| 8.36 | 11.29 | 7.72  | 8.01  | 7.19 | 6.69 | 6.88 | 6.69  | 3.82 |
| 7.24 | 9.96  | 8.33  | 9.39  | 7.41 | 6.36 | 6.63 | 9.17  | 5.75 |
| 7.51 | 10.92 | 8.42  | 8.1   | 7.51 | 6.1  | 7.51 | 7.97  | 5.51 |
| 7.73 | 10.04 | 9.73  | 9.25  | 7.03 | 6.15 | 6.96 | 10.44 | 2.19 |
| 7.68 | 10.05 | 9.96  | 9.3   | 6.77 | 5.77 | 7.11 | 11.28 | 2.74 |
| 8.31 | 9.31  | 3     | 8.87  | 4.14 | 8.58 | 4.85 | 8.19  | 1.68 |
| 7.71 | 9.93  | 8.58  | 10.32 | 7.01 | 8.22 | 6.36 | 9.95  | 5.15 |
| 7.81 | 9.47  | 8.8   | 10.02 | 6.28 | 8.29 | 6.8  | 10.03 | 1.28 |
| 7.44 | 9.22  | 8.66  | 9.7   | 7.45 | 8.14 | 6.83 | 10.18 | 6.06 |
| 7.03 | 10.39 | 8.41  | 9.7   | 7.05 | 5.48 | 6.38 | 9.71  | 0.57 |
| 5.89 | 9.09  | 9     | 10.58 | 6.85 | 6.89 | 6.66 | 10.15 | 5.34 |
| 6.28 | 9.02  | 8.87  | 10.59 | 6.92 | 6.98 | 6.62 | 9.58  | 5.23 |

<https://mc.manuscriptcentral.com/gut>

1  
2  
3  
4  
5  
6  
7  
8  
9  
10  
11  
12  
13  
14  
15  
16  
17  
18  
19  
20  
21  
22  
23  
24  
25  
26  
27  
28  
29  
30  
31  
32  
33  
34  
35  
36  
37  
38  
39  
40  
41  
42  
43  
44  
45  
46  
47  
48  
49  
50  
51  
52  
53  
54  
55  
56  
57  
58  
59  
60

|      |       |       |       |      |      |      |       |      |
|------|-------|-------|-------|------|------|------|-------|------|
| 6.43 | 9.45  | 8.95  | 10.38 | 6.77 | 7.06 | 6.65 | 10.38 | 0.79 |
| 6.42 | 8.58  | 9.12  | 8.98  | 5.85 | 5.96 | 6.49 | 9.42  | 5.01 |
| 6.91 | 8.37  | 7.95  | 6.91  | 6.29 | 6.01 | 5.91 | 8.92  | 4.39 |
| 6.79 | 8.07  | 7.77  | 6.19  | 5.19 | 6.04 | 5.57 | 8.99  | 4.29 |
| 5.01 | 8.11  | 5.14  | 5.25  | 7.88 | 7.8  | 6.98 | 5.36  | 6.98 |
| 6.72 | 9.56  | 8.51  | 9.54  | 7.06 | 5.92 | 7    | 9.39  | 1.15 |
| 6.92 | 8.72  | 6.45  | 7.07  | 6.23 | 4.95 | 5.24 | 7.46  | 0    |
| 6.86 | 8.6   | 6.11  | 6.68  | 5.81 | 4.6  | 5.21 | 7.01  | 0.35 |
| 1.86 | 7.91  | 5.23  | 6.03  | 7.88 | 7.71 | 7.45 | 7.17  | 7.48 |
| 5.53 | 9.29  | 8.01  | 8.71  | 7.05 | 7.15 | 6.99 | 8.59  | 6.68 |
| 7.29 | 10.8  | 9.47  | 10.67 | 7.18 | 6.5  | 6.56 | 10    | 0.65 |
| 6.93 | 9.61  | 9.48  | 10.2  | 7.43 | 7.08 | 7.33 | 10.34 | 5.28 |
| 6.84 | 10.26 | 9.6   | 10.22 | 7.28 | 7.04 | 6.96 | 10.23 | 1.89 |
| 6.89 | 10.02 | 10.51 | 11.71 | 7.81 | 6.47 | 7.15 | 10.62 | 5.13 |
| 8.83 | 10.59 | 5.71  | 5.35  | 6.94 | 4.87 | 7.19 | 4.13  | 4.13 |
| 7.24 | 9.66  | 8.47  | 9.38  | 7.7  | 6.21 | 6.07 | 8.19  | 3.5  |
| 7.01 | 9.28  | 8.38  | 9.22  | 7.3  | 6.96 | 6.53 | 8.44  | 5.36 |
| 7.51 | 9.57  | 8.45  | 9.2   | 7.73 | 5.56 | 6.23 | 8.12  | 3.56 |

1  
2  
3  
4  
5  
6  
7  
8  
9  
10  
11  
12  
13  
14  
15  
16  
17  
18  
19  
20  
21  
22  
23  
24  
25  
26  
27  
28  
29  
30  
31  
32  
33  
34  
35  
36  
37  
38  
39  
40  
41  
42  
43  
44  
45  
46  
47  
48  
49  
50  
51  
52  
53  
54  
55  
56  
57  
58  
59  
60

| CAMK2B | CAMK2D | CAMP | CASP8 | CAV1 | CBLC | CCBE1 | CCDC80 | CCL11 |
|--------|--------|------|-------|------|------|-------|--------|-------|
| 0.56   | 8.73   | 6.5  | 8.32  | 6.28 | 2.73 | 6.83  | 9.8    | 5.86  |
| 0.84   | 8.17   | 5.74 | 8.2   | 7.62 | 5.16 | 5.92  | 7.85   | 7.33  |
| 2.08   | 8.09   | 6.23 | 8.17  | 7.73 | 5.21 | 6.27  | 8.38   | 7.23  |
| 1.76   | 9.03   | 2.76 | 8.71  | 8.41 | 4.88 | 3.88  | 11.29  | 7.16  |
| 1.01   | 2.59   | 7.8  | 8.44  | 2.59 | 2.59 | 7.97  | 8.67   | 8.02  |
| 0.49   | 7.51   | 6.26 | 8.52  | 6.48 | 6.23 | 6.09  | 9.11   | 7.05  |
| 0.92   | 7.79   | 5.92 | 8.54  | 6.95 | 6.43 | 6.58  | 8.17   | 7.13  |
| 2.39   | 9.05   | 1.98 | 9.74  | 7.16 | 7.89 | 3.56  | 10.19  | 5.44  |
| 0.37   | 9.71   | 3.17 | 9.22  | 6.45 | 7.2  | 3.54  | 10.65  | 4.27  |
| 0.91   | 8.76   | 6.21 | 8.29  | 5.4  | 6.18 | 5.86  | 8.81   | 5.66  |
| 2.7    | 9.28   | 1.96 | 8.78  | 7.01 | 6.47 | 2.38  | 8.99   | 6.53  |
| 1.68   | 9.47   | 0.68 | 8.67  | 8.02 | 6.21 | 4     | 10.85  | 5.89  |
| 1.18   | 7.48   | 6.2  | 8.07  | 5.77 | 6.61 | 5.63  | 8.89   | 7.16  |
| 2      | 8.1    | 6.3  | 8.21  | 7.21 | 5.51 | 6.24  | 10     | 7.69  |
| 1.77   | 10.52  | 2.77 | 9.84  | 8.43 | 6.72 | 5.23  | 11.82  | 4.77  |
| 2.53   | 8.58   | 6.64 | 8.22  | 6.97 | 5.03 | 6.7   | 10.08  | 5.9   |
| 2.29   | 8.61   | 6.68 | 7.96  | 7.4  | 4.46 | 6.68  | 9.7    | 6.24  |
| 1.76   | 8.56   | 6.95 | 8.26  | 7.92 | 5.35 | 7.52  | 10.96  | 6.35  |
| 2.22   | 10.66  | 2.22 | 10.36 | 7.56 | 7.14 | 3.98  | 10.92  | 5.63  |
| 1.89   | 9.59   | 2.77 | 9.31  | 7.32 | 7.19 | 3.77  | 9.97   | 8.45  |
| 1.5    | 9.77   | 1.08 | 9.77  | 8.48 | 6.86 | 4.67  | 10.97  | 8.07  |
| 4.4    | 9.16   | 3.47 | 8.9   | 8.78 | 7.67 | 2.47  | 9.97   | 9.19  |
| 4.2    | 9.04   | 3.01 | 8.82  | 8.72 | 7.82 | 4.2   | 9.58   | 9.59  |
| 2.89   | 9.29   | 2.89 | 8.8   | 8.81 | 7.23 | 3.22  | 10.67  | 8.01  |
| 1.43   | 8.61   | 3.43 | 6.98  | 7.58 | 4.6  | 1.43  | 8.83   | 5.07  |
| 1.71   | 8.59   | 2.71 | 8.69  | 7    | 6.57 | 1.71  | 6.87   | 7.55  |
| 0.52   | 8.66   | 3.52 | 8.59  | 7.19 | 6.75 | 4.11  | 7.4    | 7.64  |
| 1.5    | 8.35   | 5.77 | 8.33  | 7.21 | 5.67 | 6.07  | 8.5    | 7.75  |
| 1.28   | 8.49   | 5.87 | 8.54  | 5.72 | 6.78 | 6.47  | 8.51   | 5.16  |
| 0.77   | 8.41   | 6.31 | 8.56  | 6.7  | 6.11 | 6.68  | 9.36   | 6.93  |
| 1.2    | 8.67   | 5.95 | 8.15  | 6.74 | 6.52 | 6.24  | 8.32   | 6.52  |
| 0.71   | 8.44   | 6.8  | 8.32  | 6.17 | 6.17 | 6.96  | 9.49   | 6.26  |
| 1.93   | 8.54   | 6.84 | 9.1   | 5.88 | 0    | 6.95  | 8.03   | 6.42  |
| 4.38   | 8.77   | 3.64 | 7.83  | 7.9  | 4.87 | 2.64  | 10.7   | 6.49  |
| 3.78   | 8.71   | 3.7  | 7.79  | 7.86 | 6.07 | 3.7   | 8.93   | 5.99  |
| 4.72   | 9.34   | 4.64 | 8.23  | 7.85 | 6.03 | 3.06  | 11.16  | 6.11  |
| 3.03   | 9.47   | 2.03 | 9.27  | 6.15 | 4.9  | 2.45  | 8.7    | 2.77  |
| 0      | 8.58   | 3.21 | 8.64  | 7.36 | 5.24 | 4.8   | 9.1    | 8.37  |
| 1.95   | 8.68   | 2.95 | 9.04  | 7.51 | 3.83 | 4.37  | 10.28  | 8.41  |
| 0      | 9.05   | 3.33 | 9.19  | 7.42 | 3.55 | 3.74  | 10.24  | 8.27  |
| 1.1    | 7.31   | 6.39 | 7.48  | 5.6  | 5.39 | 6.27  | 9.06   | 6.29  |
| 1.48   | 7.04   | 6.53 | 7.08  | 6.05 | 4.9  | 5.54  | 8.93   | 6.95  |
| 0.22   | 7      | 6.63 | 7.31  | 5.61 | 4.47 | 5.8   | 8.49   | 6.8   |
| 0      | 7.21   | 5.98 | 7.65  | 6.24 | 5.31 | 4.98  | 8.51   | 6.35  |
| 4.45   | 8.97   | 3.86 | 9.84  | 7.11 | 7.18 | 4.45  | 9.79   | 2.86  |
| 3.12   | 9.03   | 1.31 | 8.15  | 7.22 | 6.4  | 3.77  | 9.56   | 8.39  |
| 2.81   | 8.75   | 0    | 8.05  | 7.6  | 6.78 | 3.58  | 10.67  | 7.59  |
| 2.81   | 8.8    | 1.39 | 7.64  | 8.46 | 5.92 | 3.51  | 11.51  | 7.36  |
| 0.63   | 9.83   | 2.96 | 9.04  | 7.32 | 6.84 | 4.44  | 11.1   | 4.09  |
| 2.33   | 9.45   | 2.01 | 8.53  | 7.85 | 7    | 4.18  | 10.24  | 6.53  |
| 1.5    | 9.85   | 2.08 | 9.21  | 7.54 | 7.95 | 2.5   | 9.08   | 8.04  |

<https://mc.manuscriptcentral.com/gut>

|    |      |      |      |      |      |      |       |       |      |
|----|------|------|------|------|------|------|-------|-------|------|
| 1  |      |      |      |      |      |      |       |       |      |
| 2  | 2.08 | 9.53 | 2.66 | 8.77 | 7.77 | 6.99 | 3.4   | 11.06 | 6.31 |
| 3  | 1.03 | 8.14 | 6.55 | 8.53 | 5.55 | 6.89 | 5.91  | 9.9   | 4.73 |
| 4  | 0.19 | 8.07 | 6.38 | 8.27 | 7.08 | 6.05 | 6.17  | 8.11  | 5.92 |
| 5  | 0.95 | 8.48 | 6.29 | 8.44 | 6.9  | 6.38 | 5.93  | 8.18  | 6.46 |
| 6  | 0.97 | 8.27 | 6.44 | 8.39 | 6.87 | 6.16 | 6.34  | 9.42  | 5.58 |
| 7  | 1.23 | 9.75 | 4.75 | 9.56 | 8.67 | 6.72 | 5.84  | 9.8   | 3.69 |
| 8  | 4.5  | 9.38 | 2.83 | 8.91 | 8.85 | 7.53 | 4.83  | 9.32  | 5.86 |
| 9  | 1.59 | 9.63 | 1.59 | 8.7  | 8.4  | 7.45 | 3.76  | 7.07  | 4.96 |
| 10 | 3.9  | 9.88 | 2.76 | 9.05 | 8.97 | 8.05 | 4.53  | 10.22 | 5.25 |
| 11 | 3.28 | 9.42 | 0    | 8.12 | 6.86 | 5.73 | 3.17  | 9.29  | 3.17 |
| 12 | 3.13 | 8.83 | 0.54 | 8.21 | 7.42 | 5.45 | 3.71  | 8.43  | 7.36 |
| 13 | 3.4  | 8.63 | 2.14 | 7.79 | 7.18 | 5.67 | 3.72  | 7.75  | 5.9  |
| 14 | 3.56 | 8.65 | 1.56 | 7.76 | 7.75 | 5.62 | 2.56  | 9.45  | 5.4  |
| 15 | 5.15 | 7.74 | 6.15 | 8.47 | 6.74 | 6.74 | 8.74  | 11.28 | 6.74 |
| 16 | 0.79 | 8.9  | 6.31 | 9.84 | 7    | 6.11 | 8.7   | 9.91  | 8.53 |
| 17 | 0.86 | 8.09 | 6.92 | 9.38 | 6.44 | 5.45 | 7.8   | 9.32  | 7.66 |
| 18 | 0.24 | 2.83 | 8.84 | 9.75 | 2.24 | 1.24 | 10.31 | 10.47 | 9.22 |
| 19 | 1.77 | 4.94 | 8.7  | 9.21 | 3.58 | 2.36 | 9.64  | 9.64  | 8.52 |
| 20 | 2.14 | 8.62 | 6.02 | 8.18 | 6.41 | 6.09 | 6.23  | 6.81  | 5.23 |
| 21 | 2.07 | 8.67 | 6.24 | 8.22 | 5.92 | 6.36 | 6.16  | 6.08  | 4.93 |
| 22 | 1.26 | 8.86 | 6.44 | 8.35 | 5.43 | 6.1  | 6.53  | 8.26  | 6.13 |
| 23 | 3.42 | 8.85 | 2.8  | 8.1  | 7.75 | 7.14 | 2.8   | 10.46 | 6.75 |
| 24 | 1.28 | 8.52 | 4.8  | 8.06 | 7.28 | 6.98 | 5.03  | 10.25 | 7.09 |
| 25 | 1.05 | 8.08 | 6.41 | 8.13 | 7.63 | 6.22 | 6.51  | 10.82 | 6.69 |
| 26 | 2.64 | 9.66 | 3.22 | 8.97 | 7.97 | 7.14 | 5.49  | 8.92  | 8.46 |
| 27 | 2.04 | 9.17 | 3.21 | 8.88 | 8.39 | 7.44 | 5.5   | 9.72  | 8.37 |
| 28 | 2.28 | 9.26 | 2.28 | 9.06 | 8.77 | 7.52 | 5.21  | 10.52 | 7.47 |
| 29 | 2.94 | 7.64 | 6    | 7.92 | 6.9  | 6.24 | 5.88  | 8.36  | 8.19 |
| 30 | 3.56 | 7.51 | 5.91 | 7.75 | 7.28 | 6.58 | 5.73  | 9.16  | 7.73 |
| 31 | 2.96 | 7.72 | 6.24 | 7.84 | 7.08 | 6.4  | 6.06  | 9.57  | 7.26 |
| 32 | 1.7  | 9.15 | 6.9  | 8.54 | 7.01 | 6.51 | 6.86  | 10.76 | 6.51 |
| 33 | 0.2  | 9.31 | 6.72 | 8.61 | 6.31 | 6.64 | 6.48  | 8.26  | 6.13 |
| 34 | 1.58 | 9.23 | 6.9  | 8.76 | 5.58 | 6.84 | 6.98  | 8.19  | 6.33 |
| 35 | 0.73 | 7.98 | 6.72 | 8.22 | 7.76 | 5.84 | 6.27  | 10.05 | 7.25 |
| 36 | 1.88 | 7.83 | 6.66 | 8.17 | 7.53 | 5.83 | 6.4   | 9.16  | 7.56 |
| 37 | 0    | 8.05 | 7.03 | 8.35 | 8.14 | 6.13 | 6.68  | 11.1  | 7.51 |
| 38 | 0.44 | 8.24 | 6.99 | 8.64 | 6.9  | 4.24 | 7.04  | 10.33 | 6.72 |
| 39 | 0.44 | 8.24 | 6.99 | 8.64 | 6.9  | 4.24 | 7.04  | 10.33 | 6.72 |
| 40 | 1.15 | 8.58 | 6.61 | 8.6  | 7.09 | 5.06 | 6.58  | 9.94  | 7.33 |
| 41 | 1.18 | 8.41 | 7.04 | 8.49 | 7.81 | 5.13 | 6.72  | 10.62 | 7.55 |
| 42 | 2.27 | 8.5  | 6.61 | 8.61 | 7.15 | 4.86 | 6.74  | 11.49 | 7.22 |
| 43 | 1.56 | 8.07 | 7.08 | 8.53 | 5.31 | 3.36 | 7.12  | 8.22  | 7.17 |
| 44 | 1.3  | 8.03 | 6.47 | 8.31 | 7.11 | 6.47 | 6.11  | 9.45  | 7.91 |
| 45 | 0.95 | 8.27 | 5.76 | 8.17 | 7.01 | 6.47 | 6.01  | 8.65  | 8.34 |
| 46 | 2.61 | 8    | 6.78 | 8.43 | 7.33 | 4.93 | 6.8   | 10.42 | 7.81 |
| 47 | 2.73 | 8.88 | 1.31 | 8.44 | 7.43 | 6.74 | 3.19  | 9.83  | 6.56 |
| 48 | 1.66 | 8.56 | 1.08 | 8.02 | 7.58 | 7.32 | 3.4   | 8.09  | 6.1  |
| 49 | 1.52 | 9.2  | 3.98 | 8.81 | 7.77 | 6.58 | 4.91  | 10.09 | 5.65 |
| 50 | 1.74 | 8.03 | 7.14 | 8.15 | 5.48 | 4.06 | 7.19  | 9.77  | 7.03 |
| 51 | 2.02 | 7.98 | 6.85 | 7.59 | 7.76 | 4.6  | 7.03  | 11.28 | 7.85 |
| 52 | 2.04 | 7.65 | 6.72 | 7.72 | 7.55 | 3.92 | 6.74  | 10.96 | 6.92 |
| 53 | 2.98 | 7.81 | 6.12 | 7.92 | 6.44 | 5.68 | 6.18  | 8.45  | 7.39 |

1  
2  
3  
4  
5  
6  
7  
8  
9  
10  
11  
12  
13  
14  
15  
16  
17  
18  
19  
20  
21  
22  
23  
24  
25  
26  
27  
28  
29  
30  
31  
32  
33  
34  
35  
36  
37  
38  
39  
40  
41  
42  
43  
44  
45  
46  
47  
48  
49  
50  
51  
52  
53  
54  
55  
56  
57  
58  
59  
60

|      |       |      |       |      |      |      |       |       |
|------|-------|------|-------|------|------|------|-------|-------|
| 0.89 | 7.9   | 6.31 | 7.84  | 6.63 | 5.67 | 6.12 | 8.47  | 7.35  |
| 0.78 | 7.36  | 7.32 | 8.15  | 6.46 | 4.99 | 7.32 | 9.84  | 7.98  |
| 2.05 | 9.78  | 6.08 | 9.19  | 6.59 | 5.53 | 6.61 | 9.76  | 5.42  |
| 1.08 | 9.13  | 5.32 | 8.84  | 8.53 | 6.42 | 5.69 | 10.67 | 8.38  |
| 2.49 | 9.26  | 4.66 | 8.67  | 8.74 | 6.04 | 5.58 | 11.98 | 6.62  |
| 3.21 | 9.5   | 2.73 | 8.82  | 7.67 | 5.45 | 3.73 | 10.84 | 5.93  |
| 0.55 | 9.37  | 2.36 | 7.96  | 7.71 | 6.22 | 3.01 | 8.75  | 6.91  |
| 1.34 | 9.06  | 3.08 | 8.1   | 7.56 | 6.36 | 3.76 | 9.5   | 7.44  |
| 2.49 | 10.36 | 3.49 | 9.9   | 9.02 | 6.89 | 3.49 | 12.05 | 4.49  |
| 2.38 | 9.67  | 3.6  | 9.13  | 6.75 | 7.96 | 3.38 | 10.39 | 3.79  |
| 0.49 | 9.11  | 3.3  | 8.08  | 7.26 | 7.7  | 2.49 | 8.97  | 5.62  |
| 1.48 | 7.96  | 5.59 | 7.86  | 5.62 | 6.58 | 5.56 | 7.71  | 6.37  |
| 2.26 | 10.04 | 3.26 | 9.82  | 7.55 | 8.39 | 5.58 | 11.63 | 4.26  |
| 0    | 2.2   | 8.64 | 8.85  | 1.2  | 1.52 | 8.12 | 9.15  | 7.73  |
| 0.95 | 7.19  | 4.59 | 7.99  | 6.82 | 8.01 | 3.75 | 8.65  | 5.9   |
| 0.83 | 7.35  | 2.64 | 8.12  | 7.13 | 7.89 | 2.16 | 7.76  | 5.51  |
| 2.1  | 7.5   | 3.69 | 7.95  | 6.92 | 7.88 | 3.61 | 9.28  | 5.63  |
| 2.6  | 9.13  | 2.76 | 8.55  | 8.55 | 5.72 | 3.68 | 9.08  | 6.87  |
| 0    | 8.32  | 6.35 | 8.22  | 7.87 | 4.44 | 7.01 | 9.73  | 6.92  |
| 1.98 | 8.73  | 6.01 | 8.47  | 8.35 | 5.04 | 6.4  | 9.98  | 6.9   |
| 7.16 | 9.07  | 5.16 | 10.81 | 6.75 | 7.49 | 7.75 | 11.57 | 6.16  |
| 1.13 | 8.57  | 2.59 | 8.09  | 7.13 | 7.38 | 3.59 | 6.17  | 5.53  |
| 2.86 | 8.88  | 3.54 | 8.51  | 7.09 | 6.86 | 3.12 | 8.91  | 7.39  |
| 1.18 | 8.78  | 1.18 | 8.98  | 7.73 | 7.77 | 4.99 | 9.42  | 4.88  |
| 2.91 | 9.11  | 2.91 | 9.26  | 7.99 | 7.67 | 5.55 | 10.22 | 5.08  |
| 3.71 | 9.11  | 3.13 | 8.94  | 8.01 | 6.88 | 4.71 | 11.58 | 5.24  |
| 1    | 6.7   | 7.76 | 7.87  | 5.52 | 2    | 7.87 | 8.08  | 7.21  |
| 1.86 | 0.86  | 7.98 | 7.68  | 0.86 | 0.86 | 8.17 | 8.03  | 7.33  |
| 2.77 | 1.77  | 7.55 | 7.67  | 1.77 | 1.77 | 7.83 | 8.07  | 6.94  |
| 2.59 | 8.03  | 0.01 | 7.61  | 6.65 | 4.18 | 3.33 | 10.63 | 4.01  |
| 0.59 | 8.02  | 0.59 | 7.37  | 8.1  | 4.11 | 4.05 | 11.46 | 6.68  |
| 1.11 | 7.98  | 0.11 | 7.71  | 7.72 | 5.02 | 4.69 | 10.54 | 5.02  |
| 1.16 | 8.19  | 2.16 | 7.36  | 7.99 | 3.61 | 4.48 | 11.94 | 5.16  |
| 1.45 | 6.04  | 6.94 | 7.45  | 3.04 | 2.04 | 7.39 | 8.39  | 6.86  |
| 0.25 | 6.18  | 6.36 | 7.21  | 1.25 | 3.25 | 7.1  | 7.02  | 6.46  |
| 0    | 6.72  | 6.04 | 7.29  | 2.93 | 4.2  | 6.54 | 6.86  | 6.24  |
| 0    | 0.32  | 6.91 | 8.12  | 0    | 0    | 8.4  | 8.32  | 8.06  |
| 1.34 | 5.04  | 7.34 | 7.06  | 2.34 | 1.34 | 7.09 | 7.73  | 6.58  |
| 1.1  | 3.9   | 7.03 | 7.12  | 3.68 | 1.1  | 6.65 | 7.85  | 6.59  |
| 0.31 | 4.63  | 6.77 | 6.86  | 1.89 | 2.31 | 6.74 | 7.89  | 6.8   |
| 2.41 | 4.73  | 5.87 | 8.52  | 3.41 | 2.41 | 8.37 | 10.24 | 10.01 |
| 2.64 | 6.84  | 8.11 | 8.18  | 4.06 | 3.06 | 7.95 | 7.97  | 7.4   |
| 0    | 0.91  | 8.36 | 8.03  | 0.33 | 0    | 8.23 | 8.28  | 7.77  |
| 2.45 | 8.86  | 7.33 | 8.41  | 4.67 | 5.45 | 7.24 | 7.19  | 6.7   |
| 0    | 7.49  | 7.85 | 7.86  | 2.07 | 2.75 | 7.91 | 7.82  | 7.53  |
| 1.62 | 7.89  | 7.12 | 8.49  | 5.25 | 3.88 | 7.34 | 9.19  | 7.76  |
| 0.3  | 6.5   | 7.67 | 8.26  | 4.69 | 2.3  | 7.83 | 8.64  | 8.28  |
| 0.71 | 1.71  | 7.21 | 8.37  | 0.71 | 0.71 | 7.84 | 8.37  | 8.62  |
| 0    | 6.11  | 7.77 | 8.6   | 3.71 | 1.48 | 8.56 | 9.18  | 9.37  |
| 0    | 7.88  | 5.47 | 8.64  | 5    | 4.72 | 5.27 | 9.56  | 6.22  |
| 0.74 | 8.05  | 5.36 | 8.33  | 5.3  | 5.39 | 5.07 | 8.69  | 6.51  |
| 1.04 | 7.87  | 6.15 | 8.22  | 5.97 | 5.12 | 5.46 | 9.1   | 7.09  |

<https://mc.manuscriptcentral.com/gut>



|    |      |       |      |       |      |      |      |       |      |
|----|------|-------|------|-------|------|------|------|-------|------|
| 1  |      |       |      |       |      |      |      |       |      |
| 2  | 1.85 | 7.99  | 6.44 | 8.24  | 5.27 | 4.97 | 5.55 | 9.58  | 6.44 |
| 3  | 0.52 | 8.79  | 6.01 | 8.61  | 7.23 | 5.56 | 6.62 | 10.62 | 7.16 |
| 4  | 2.24 | 8.99  | 6.27 | 8.36  | 7.95 | 5.7  | 6.74 | 10.27 | 8.76 |
| 5  | 2.74 | 8.18  | 6.62 | 8.28  | 6.55 | 4.91 | 5.74 | 9.23  | 7.4  |
| 6  | 0.95 | 8.27  | 6.71 | 8.34  | 6.51 | 5.2  | 6.27 | 8.92  | 7.5  |
| 7  | 0    | 8.84  | 6.73 | 9.07  | 6.64 | 5.85 | 7.33 | 10.18 | 7.33 |
| 8  | 3.43 | 9.2   | 3.16 | 9.52  | 8.37 | 6.37 | 5.16 | 11.3  | 7.75 |
| 9  | 0.98 | 8.84  | 4.07 | 9.17  | 7.64 | 6.26 | 4.98 | 10.04 | 7.95 |
| 10 | 2.33 | 10.11 | 4.2  | 9.88  | 9.87 | 6.1  | 6.27 | 12.38 | 8.23 |
| 11 | 0.76 | 10.51 | 5.57 | 8.69  | 7.48 | 7.09 | 5.41 | 10.25 | 4.46 |
| 12 | 1.75 | 9.84  | 5.25 | 8.42  | 7.53 | 6.14 | 6.49 | 10.47 | 6.38 |
| 13 | 2.71 | 10.04 | 5.34 | 8.29  | 7.67 | 5.94 | 6.36 | 10.09 | 7.19 |
| 14 | 1.65 | 10.24 | 4.97 | 8.23  | 7.81 | 6.51 | 6.04 | 10.32 | 5.31 |
| 15 | 1.8  | 7.86  | 5.82 | 8.38  | 5.74 | 6.84 | 5.85 | 9.21  | 5.52 |
| 16 | 2.09 | 8.41  | 2.97 | 8.78  | 7.09 | 7.58 | 3.51 | 9.17  | 6.66 |
| 17 | 2.73 | 8.8   | 5.05 | 8.65  | 8.49 | 6.7  | 5.93 | 11.56 | 6.25 |
| 18 | 1    | 9.5   | 2    | 9.13  | 7.11 | 4.85 | 4.75 | 11.01 | 5.72 |
| 19 | 2.67 | 8.97  | 2.25 | 8.27  | 7.67 | 5.8  | 3.25 | 10.3  | 8.47 |
| 20 | 1.52 | 9.36  | 2.52 | 8.61  | 8.72 | 5.16 | 4.33 | 11.2  | 6.38 |
| 21 | 0    | 9.51  | 2.25 | 9.08  | 6.88 | 5.84 | 2.25 | 11.02 | 4.93 |
| 22 | 1.13 | 7.65  | 3.13 | 8.17  | 7.65 | 5.73 | 3.94 | 9.6   | 8.57 |
| 23 | 0    | 7.76  | 2.29 | 8.23  | 6.61 | 6.29 | 3.29 | 8.34  | 6.37 |
| 24 | 3.91 | 8.93  | 6.06 | 8.33  | 7.55 | 5.63 | 6.43 | 9.19  | 6.86 |
| 25 | 3.25 | 8.98  | 5.79 | 8.21  | 6.97 | 6.45 | 5.63 | 8.4   | 5.93 |
| 26 | 5.15 | 10.7  | 3.15 | 9.38  | 9.74 | 7.24 | 5.15 | 12.11 | 4.15 |
| 27 | 0.36 | 8.31  | 3.53 | 8.1   | 6.09 | 5.17 | 1.95 | 8.69  | 4.75 |
| 28 | 1.79 | 7.64  | 5.18 | 7.96  | 7.48 | 4.6  | 5.38 | 8.91  | 8.17 |
| 29 | 1.76 | 7.26  | 4.67 | 7.8   | 6.61 | 5.35 | 4.29 | 7.96  | 6.96 |
| 30 | 1.9  | 8.41  | 1.9  | 6.07  | 9.24 | 2.9  | 5.48 | 10.47 | 8.76 |
| 31 | 1.76 | 3.76  | 6.93 | 6.08  | 1.76 | 1.76 | 6.62 | 7.4   | 6.85 |
| 32 | 0.72 | 5.42  | 7.15 | 6.53  | 5.89 | 2.3  | 6.36 | 7.69  | 7.02 |
| 33 | 0.88 | 1.88  | 7.22 | 6.5   | 0.88 | 2.47 | 6.61 | 7.07  | 7.01 |
| 34 | 0.96 | 4.13  | 7.38 | 6.71  | 2.96 | 0.96 | 6.68 | 7.48  | 6.57 |
| 35 | 1.36 | 7.07  | 5.61 | 7.42  | 4.68 | 3.82 | 5.24 | 7.63  | 4.75 |
| 36 | 0    | 6.8   | 6.2  | 7.3   | 5.44 | 3.66 | 5.95 | 8.45  | 7.09 |
| 37 | 0.77 | 6.44  | 6.05 | 6.99  | 6.32 | 2.77 | 5.85 | 9.26  | 6.92 |
| 38 | 1.49 | 7.1   | 5.75 | 6.86  | 6.97 | 2.49 | 5.59 | 10.2  | 6.36 |
| 39 | 3.16 | 9.96  | 4.44 | 9.45  | 5.81 | 0.35 | 2.94 | 8.77  | 0.35 |
| 40 | 4.05 | 8.76  | 5.05 | 8.43  | 6.92 | 6.27 | 6.05 | 9.48  | 7.61 |
| 41 | 2    | 9.64  | 2    | 8.94  | 7.35 | 6.93 | 5.37 | 8.49  | 6.57 |
| 42 | 3.82 | 10.76 | 3.23 | 10.63 | 7.63 | 7.4  | 7.82 | 10.94 | 6.32 |
| 43 | 0.91 | 8.81  | 6.01 | 8.35  | 5.73 | 6.69 | 6.23 | 9.93  | 5.4  |
| 44 | 4.51 | 10.07 | 5.51 | 10.13 | 8.6  | 5.51 | 8.76 | 11.97 | 6.51 |
| 45 | 2.19 | 8.82  | 2.45 | 8.48  | 7.49 | 6.82 | 4.68 | 10.85 | 8.22 |
| 46 | 0    | 9.19  | 1.52 | 8.38  | 8.2  | 7.1  | 3.94 | 11.26 | 6.24 |
| 47 | 1.68 | 8.87  | 1.68 | 8.58  | 5.14 | 7.16 | 0.68 | 4.14  | 0.68 |
| 48 | 2.31 | 8.8   | 4.98 | 8.87  | 7.55 | 6.29 | 5.94 | 10.61 | 6.17 |
| 49 | 1.86 | 8.73  | 2.6  | 8.85  | 7.24 | 6.36 | 3.45 | 10.5  | 6.25 |
| 50 | 1.26 | 8.22  | 5.87 | 8.37  | 7.14 | 5.72 | 6.21 | 10.1  | 6.89 |
| 51 | 0.57 | 8.89  | 1.16 | 8.37  | 5.06 | 4.16 | 4.93 | 11.35 | 4.33 |
| 52 | 0.53 | 8.28  | 5.05 | 7.17  | 6.46 | 3.11 | 5.57 | 9.92  | 6.85 |
| 53 | 0    | 7.97  | 5.59 | 7.13  | 6.04 | 4.42 | 5.62 | 9.79  | 6.16 |

1  
2  
3  
4  
5  
6  
7  
8  
9  
10  
11  
12  
13  
14  
15  
16  
17  
18  
19  
20  
21  
22  
23  
24  
25  
26  
27  
28  
29  
30  
31  
32  
33  
34  
35  
36  
37  
38  
39  
40  
41  
42  
43  
44  
45  
46  
47  
48  
49  
50  
51  
52  
53  
54  
55  
56  
57  
58  
59  
60

|      |      |      |      |      |      |      |       |      |
|------|------|------|------|------|------|------|-------|------|
| 0.79 | 9.22 | 0.79 | 7.42 | 8.67 | 4.25 | 4.11 | 10.82 | 4.49 |
| 1.1  | 8.43 | 4.8  | 6.8  | 5.62 | 4.8  | 6.1  | 12.25 | 3.68 |
| 2.59 | 7.03 | 5.23 | 7.39 | 6.34 | 5.11 | 4.29 | 7.85  | 5.94 |
| 0.49 | 7.19 | 4.07 | 7.27 | 5.88 | 5.7  | 4.66 | 7.35  | 5.24 |
| 3.14 | 6.25 | 7.17 | 7.89 | 5.8  | 1.55 | 7.53 | 9.09  | 5.25 |
| 1.89 | 8.26 | 1.15 | 7.54 | 6.69 | 4.47 | 1.57 | 9.98  | 4.37 |
| 1.87 | 8.29 | 0.07 | 7.8  | 4.87 | 4.71 | 3.71 | 7.67  | 3.77 |
| 0.35 | 8.25 | 0.35 | 7.88 | 4.84 | 5.24 | 3.6  | 7.22  | 4.16 |
| 0.27 | 1.27 | 7.51 | 7.57 | 2.27 | 0.27 | 7.66 | 7.34  | 6.87 |
| 1.28 | 7.89 | 6.73 | 7.65 | 5.73 | 3.66 | 6.65 | 9.4   | 7.23 |
| 2.24 | 9.44 | 1.24 | 8.43 | 6.01 | 5.21 | 3.65 | 11.36 | 3.35 |
| 0.89 | 8.44 | 5.64 | 7.53 | 6.98 | 4.98 | 5.8  | 10.43 | 6.67 |
| 3.3  | 9.28 | 2.89 | 8.12 | 7.39 | 5.35 | 4.95 | 11.38 | 6.47 |
| 2.13 | 8.84 | 4.65 | 7.91 | 7.34 | 3.83 | 5.85 | 12.7  | 5.37 |
| 2.54 | 9.51 | 5.71 | 9.08 | 6.45 | 6.94 | 7.35 | 11.26 | 2.54 |
| 1.8  | 8    | 5.35 | 8.42 | 6.24 | 5.19 | 5.19 | 9.35  | 6.98 |
| 1.23 | 6.92 | 5.96 | 7.75 | 6.36 | 4.63 | 5.8  | 8.74  | 7.38 |
| 0.75 | 8.34 | 5.24 | 8.64 | 6.65 | 5.4  | 4.45 | 9.54  | 6.47 |

1  
2  
3  
4  
5  
6  
7  
8  
9  
10  
11  
12  
13  
14  
15  
16  
17  
18  
19  
20  
21  
22  
23  
24  
25  
26  
27  
28  
29  
30  
31  
32  
33  
34  
35  
36  
37  
38  
39  
40  
41  
42  
43  
44  
45  
46  
47  
48  
49  
50  
51  
52  
53  
54  
55  
56  
57  
58  
59  
60

| CCL21 | CCL5  | CCL7 | CCL8 | CCR2 | CCR3 | CD163 | CD24  | CD2AP |
|-------|-------|------|------|------|------|-------|-------|-------|
| 11.62 | 8.84  | 0    | 5.9  | 7.47 | 6.8  | 8.62  | 11.9  | 8.09  |
| 6.87  | 7.72  | 2.16 | 5.36 | 6.23 | 6.24 | 8.32  | 12.42 | 10.58 |
| 7.85  | 8.06  | 2.67 | 5.29 | 6.64 | 6.71 | 8.6   | 12.53 | 9.93  |
| 10.25 | 8.08  | 2.76 | 3.76 | 6.06 | 3.64 | 8.72  | 12.12 | 10.36 |
| 8.74  | 7.53  | 1.01 | 7.2  | 8.3  | 8.69 | 8.41  | 9.01  | 7.31  |
| 7.84  | 8.84  | 1.49 | 5.9  | 6.85 | 6.6  | 7.93  | 12.06 | 8.5   |
| 7.12  | 8.83  | 0.92 | 5.8  | 6.79 | 6.43 | 8.54  | 12.45 | 8.81  |
| 9.02  | 10.35 | 1.39 | 4.2  | 6.28 | 3.56 | 8.18  | 12.08 | 9.62  |
| 8.22  | 9.56  | 0.37 | 4.76 | 6.22 | 2.69 | 8.95  | 11.99 | 9.44  |
| 6.73  | 7.34  | 0.91 | 5.16 | 6.25 | 5.98 | 7.67  | 12.42 | 9.29  |
| 8.36  | 8.17  | 1.96 | 3.84 | 4.29 | 3.7  | 7.63  | 12.66 | 9.31  |
| 9.01  | 8.44  | 3    | 5.44 | 4.59 | 3.49 | 8.77  | 12.43 | 9.52  |
| 8.05  | 7.36  | 1.51 | 5.37 | 6.84 | 6.45 | 7.55  | 10.6  | 9.02  |
| 8.31  | 8.28  | 1.26 | 5.67 | 6.9  | 6.75 | 8.04  | 10.45 | 8.83  |
| 10.49 | 10.81 | 2.77 | 4.58 | 8.23 | 2.77 | 7.98  | 8.13  | 9.37  |
| 12.52 | 8.45  | 2.94 | 6.64 | 7.47 | 6.99 | 8.76  | 11.29 | 8.39  |
| 9.37  | 8.46  | 1.29 | 5.93 | 7.02 | 6.78 | 8.1   | 12.88 | 8.6   |
| 8.89  | 7.33  | 2.35 | 6.12 | 7.21 | 6.89 | 8.51  | 10.76 | 8.09  |
| 14.57 | 12.15 | 2.22 | 4.9  | 7.48 | 1.9  | 7.87  | 11.84 | 9.72  |
| 8.86  | 10.91 | 1.63 | 4.73 | 6.41 | 3.63 | 7.96  | 13.28 | 9.67  |
| 10.48 | 11.72 | 1.08 | 5.69 | 7.42 | 3.59 | 8.32  | 12.53 | 9.23  |
| 7.48  | 8.57  | 1.73 | 4.24 | 5.47 | 3.73 | 9.45  | 12.15 | 9.62  |
| 8.18  | 8.77  | 0.2  | 4.01 | 5.59 | 3.52 | 9.45  | 12.29 | 9.52  |
| 8.12  | 8.51  | 1.89 | 3.89 | 5.51 | 3.06 | 9.75  | 12.57 | 9.51  |
| 6.9   | 9.59  | 1.43 | 4.67 | 6.15 | 2.43 | 8.29  | 10.28 | 8.34  |
| 6.56  | 6.59  | 1.71 | 2.45 | 5.04 | 2.45 | 7.52  | 12.38 | 10.5  |
| 6.86  | 6.47  | 0.52 | 3.33 | 5.11 | 3.33 | 7.44  | 12.35 | 10.21 |
| 7.21  | 6.54  | 0    | 5.12 | 6.67 | 6.07 | 7.95  | 11.84 | 9.64  |
| 10.69 | 7.26  | 0.7  | 5.02 | 6.59 | 6.41 | 7.51  | 11.35 | 9.22  |
| 7.97  | 7.66  | 0.77 | 5.2  | 7.53 | 6.43 | 8.48  | 11.93 | 9.6   |
| 6.42  | 7.05  | 0.2  | 4.66 | 6.55 | 6.37 | 7.56  | 11.71 | 9.81  |
| 8.78  | 8     | 0.71 | 5.66 | 7.5  | 7.1  | 8.33  | 10.63 | 9.48  |
| 14    | 8.77  | 0.93 | 6.76 | 7.01 | 6.88 | 8.55  | 9.68  | 7.82  |
| 7.13  | 7.43  | 2.06 | 3.97 | 5.27 | 3.38 | 8.49  | 10.18 | 9.6   |
| 7.32  | 7.5   | 1.2  | 2.61 | 5.44 | 3.7  | 7.71  | 11.43 | 9.84  |
| 8.35  | 8.56  | 0.47 | 4.06 | 5.72 | 3.06 | 8.57  | 10.35 | 9.61  |
| 13.17 | 11.12 | 0.45 | 4.35 | 7.25 | 3.9  | 7.42  | 11.25 | 9.77  |
| 8.86  | 11.56 | 2.86 | 4.53 | 7.29 | 3.4  | 8.01  | 10.04 | 9.64  |
| 8.59  | 12.41 | 1.37 | 4.69 | 7.93 | 3.17 | 8.42  | 7.32  | 9.18  |
| 8.54  | 12.49 | 2.33 | 4.5  | 7.92 | 4.2  | 8.95  | 8.57  | 8.98  |
| 11.32 | 7.66  | 0.51 | 5.51 | 6.71 | 6.33 | 8.34  | 10.2  | 8.06  |
| 8.44  | 6.93  | 0    | 5.7  | 6.53 | 6.78 | 7.53  | 10.83 | 7.99  |
| 8.69  | 7.31  | 1.8  | 5.68 | 6.68 | 6.47 | 7.53  | 10.66 | 7.93  |
| 7.37  | 7.75  | 2.14 | 4.77 | 5.57 | 5.67 | 6.79  | 11.05 | 8.75  |
| 10.8  | 8.45  | 2.86 | 2.86 | 5.45 | 2.86 | 6.32  | 8.74  | 7.72  |
| 8.12  | 7.78  | 0.31 | 3.77 | 5.12 | 3.31 | 7.97  | 13.58 | 8.8   |
| 6.66  | 7.59  | 1.58 | 3    | 5.25 | 2    | 8.08  | 14.26 | 8.62  |
| 6.65  | 7.94  | 1.81 | 2.13 | 4.94 | 2.62 | 8.42  | 13.37 | 8.2   |
| 9.66  | 10.47 | 2.22 | 6.09 | 7.55 | 2.22 | 9.17  | 10.94 | 9.97  |
| 8.82  | 9.83  | 3.33 | 7.44 | 5.87 | 4.18 | 9.1   | 12.21 | 9.98  |
| 8.18  | 10.5  | 2.08 | 6.78 | 6.05 | 4.5  | 8.86  | 12.23 | 10.08 |

<https://mc.manuscriptcentral.com/gut>

1  
2  
3  
4  
5  
6  
7  
8  
9  
10  
11  
12  
13  
14  
15  
16  
17  
18  
19  
20  
21  
22  
23  
24  
25  
26  
27  
28  
29  
30  
31  
32  
33  
34  
35  
36  
37  
38  
39  
40  
41  
42  
43  
44  
45  
46  
47  
48  
49  
50  
51  
52  
53  
54  
55  
56  
57  
58  
59  
60

|       |       |      |      |      |      |      |       |       |
|-------|-------|------|------|------|------|------|-------|-------|
| 8.07  | 10.47 | 2.08 | 7.22 | 6.14 | 4.72 | 9.41 | 12.12 | 9.92  |
| 10.2  | 7.2   | 2.03 | 4.28 | 6.76 | 6.66 | 7.61 | 11.64 | 9.5   |
| 7.57  | 7.17  | 1.77 | 4.65 | 6.9  | 6.73 | 7.59 | 11.64 | 9.25  |
| 7.3   | 6.79  | 1.95 | 5.04 | 6.55 | 6.49 | 7.49 | 12.85 | 9.47  |
| 7.46  | 7.88  | 0    | 5.18 | 6.96 | 6.71 | 7.91 | 11.23 | 9.34  |
| 13.56 | 8.98  | 0.23 | 2.55 | 5.81 | 5.36 | 8.79 | 12.03 | 9.51  |
| 7.33  | 8.28  | 1.25 | 3.05 | 4.83 | 3.57 | 8.44 | 13.95 | 9.6   |
| 4.73  | 7.1   | 1.32 | 2.17 | 3.17 | 2.59 | 6.73 | 14.41 | 9.42  |
| 7.87  | 8.27  | 1.44 | 2.44 | 4.53 | 2.44 | 7.87 | 13.82 | 9.27  |
| 5.96  | 8.92  | 1.58 | 4.44 | 6.8  | 2.58 | 8.25 | 10.84 | 9.81  |
| 8.82  | 8.62  | 1.54 | 4    | 6.03 | 3.71 | 8.45 | 12.12 | 10.1  |
| 6.49  | 7.94  | 0    | 3.4  | 5.14 | 3.99 | 7.96 | 11.25 | 9.84  |
| 8.26  | 8.65  | 0    | 2.98 | 6.09 | 3.15 | 8.39 | 10.45 | 9.71  |
| 8.32  | 8.61  | 5.15 | 5.15 | 7.96 | 5.15 | 8.32 | 9.61  | 7.47  |
| 9.34  | 10.86 | 0.79 | 5.88 | 7.65 | 7.66 | 8.75 | 8.91  | 9.72  |
| 8.56  | 10.14 | 2.28 | 6.34 | 7.74 | 7.56 | 8.93 | 9.46  | 9.27  |
| 9.45  | 7.56  | 0.24 | 7.46 | 8.67 | 9.56 | 9.54 | 7.13  | 9.27  |
| 9.72  | 7.74  | 3.1  | 6.98 | 8.48 | 9.19 | 9.13 | 7.27  | 8.95  |
| 6.57  | 7.64  | 0.14 | 4.84 | 6.46 | 6.02 | 6.68 | 12.34 | 9.2   |
| 6.74  | 7.22  | 0    | 5.39 | 6.53 | 6.13 | 6.78 | 12.9  | 9.38  |
| 8.12  | 8.57  | 0    | 5.53 | 7.12 | 6.63 | 7.36 | 12.06 | 9.28  |
| 8.1   | 7.6   | 0.1  | 3.42 | 4.56 | 2.1  | 8.75 | 13.03 | 10.98 |
| 8.16  | 7.57  | 1.28 | 4.45 | 5.77 | 5.14 | 8.54 | 12.38 | 10.7  |
| 8.16  | 7.75  | 2.05 | 6.22 | 7.12 | 6.69 | 8.64 | 12.27 | 10.39 |
| 9.3   | 10.23 | 1.64 | 3.81 | 5.34 | 5.1  | 8.91 | 13.64 | 10.05 |
| 10.16 | 9.34  | 0.04 | 4.36 | 4.8  | 4.68 | 9.02 | 13.54 | 10.13 |
| 10.1  | 9.81  | 2.28 | 4.28 | 5.08 | 3.01 | 9.26 | 13.08 | 10.14 |
| 8.04  | 8.27  | 3.36 | 6.57 | 7.59 | 6.14 | 8.16 | 12.24 | 9.23  |
| 7.62  | 8.03  | 3.98 | 6.99 | 7.29 | 6.34 | 8.15 | 12.24 | 9.33  |
| 7.64  | 8.63  | 3.47 | 6.26 | 7.78 | 6.53 | 8.53 | 11.94 | 9.16  |
| 8.44  | 8.71  | 0.12 | 6.53 | 7.46 | 7.08 | 8.51 | 11.96 | 8.68  |
| 7.14  | 7.61  | 0.2  | 5.52 | 6.9  | 6.91 | 8.22 | 11.84 | 8.91  |
| 7.47  | 8.13  | 1.58 | 6.03 | 7.44 | 7.25 | 7.77 | 11.87 | 9.06  |
| 7.39  | 8.14  | 1.73 | 6.05 | 7.04 | 6.79 | 8.88 | 11.99 | 9.33  |
| 7.36  | 8.23  | 1.46 | 5.61 | 7.2  | 6.97 | 8.5  | 12.67 | 9.48  |
| 7.91  | 8.52  | 3.09 | 6.11 | 7.12 | 7.01 | 9.33 | 11.69 | 9.31  |
| 11.95 | 8.88  | 1.44 | 6.32 | 7.84 | 7.14 | 8.29 | 10.74 | 8.55  |
| 11.95 | 8.88  | 1.44 | 6.32 | 7.84 | 7.14 | 8.29 | 10.74 | 8.55  |
| 8.2   | 8.16  | 1.15 | 6.34 | 6.93 | 7.2  | 7.65 | 11.08 | 9.18  |
| 8.75  | 8.28  | 0.18 | 6.26 | 7.19 | 7.26 | 8.01 | 11.12 | 9.11  |
| 7.82  | 8.29  | 1.69 | 6.43 | 6.93 | 7.04 | 7.92 | 10.76 | 8.99  |
| 12.68 | 8.72  | 0.56 | 6.8  | 7.64 | 7.64 | 7.9  | 9.76  | 8.24  |
| 8.45  | 7.92  | 2.62 | 6.16 | 6.96 | 6.84 | 8.07 | 10.9  | 9.84  |
| 7.74  | 7.7   | 0    | 5.99 | 6.31 | 5.78 | 7.58 | 12.16 | 10.11 |
| 8.67  | 8.24  | 0.61 | 6.7  | 7.52 | 7.28 | 8.43 | 10.74 | 9.17  |
| 5.01  | 8.15  | 1.73 | 2.9  | 5.12 | 3.05 | 6.7  | 12.56 | 9.37  |
| 4.54  | 5.88  | 1.08 | 3.25 | 3.98 | 3.08 | 5.47 | 13.02 | 9.49  |
| 8.09  | 8.82  | 0.52 | 3.84 | 6.32 | 4.22 | 8.62 | 11.95 | 9.63  |
| 12.96 | 8.32  | 0.15 | 6.56 | 7.71 | 7.42 | 8.21 | 9.86  | 7.9   |
| 8.79  | 7.47  | 1.6  | 6.08 | 7.76 | 6.98 | 8.46 | 10.01 | 7.89  |
| 7.53  | 7.18  | 2.78 | 6.31 | 7.53 | 7.13 | 8.1  | 9.81  | 7.91  |
| 7.7   | 8.46  | 2.4  | 6.37 | 7.47 | 7.29 | 7.56 | 10.29 | 8.94  |

<https://mc.manuscriptcentral.com/gut>

|    |       |       |      |      |      |      |      |       |       |
|----|-------|-------|------|------|------|------|------|-------|-------|
| 1  |       |       |      |      |      |      |      |       |       |
| 2  | 7.37  | 7.99  | 1.89 | 5.98 | 7    | 6.7  | 7.55 | 10.64 | 9.27  |
| 3  | 8.34  | 7.68  | 0    | 7.14 | 7.8  | 8.06 | 8.02 | 8.11  | 8.59  |
| 4  | 14.02 | 9.09  | 0    | 5.25 | 6.41 | 5.69 | 8.82 | 10.27 | 9.35  |
| 5  | 9.67  | 7.4   | 1.08 | 4.66 | 6.25 | 4.78 | 9.31 | 12.98 | 9.11  |
| 6  | 8.36  | 7.82  | 2.08 | 4.3  | 5.78 | 4.4  | 9.88 | 10.46 | 9.08  |
| 7  | 12.08 | 10.7  | 1.41 | 5.11 | 7.76 | 3.87 | 8.07 | 11.42 | 9.29  |
| 8  | 7.8   | 7.42  | 2.13 | 3.13 | 4.5  | 3.13 | 7.5  | 14.31 | 9.63  |
| 9  | 8.3   | 7.54  | 1.76 | 4.71 | 4.89 | 4.15 | 8.03 | 14.19 | 9.71  |
| 10 | 10.46 | 10.03 | 4.08 | 4.08 | 7.66 | 4.82 | 7.92 | 11.24 | 10.22 |
| 11 | 12.37 | 9.79  | 0.79 | 4.38 | 6.92 | 3.11 | 7.1  | 11.17 | 9.01  |
| 12 | 6.51  | 8.8   | 1.49 | 2.81 | 4.81 | 2.49 | 6.74 | 12.5  | 9.12  |
| 13 | 7.58  | 8.21  | 1.48 | 5.82 | 6.37 | 6    | 7.45 | 12.09 | 8.75  |
| 14 | 9.36  | 10.5  | 3.26 | 3.26 | 7.47 | 3.85 | 7.47 | 10.57 | 9.56  |
| 15 | 9.45  | 8.02  | 0.2  | 7.18 | 9    | 8.84 | 9.14 | 8.97  | 7.38  |
| 16 | 5.12  | 5.37  | 0.95 | 3.75 | 3.95 | 3.85 | 6.16 | 13.22 | 8.48  |
| 17 | 5.64  | 5.94  | 0    | 3.42 | 2.16 | 2.42 | 5.96 | 13.42 | 8.59  |
| 18 | 6.68  | 6.31  | 0.52 | 3.69 | 4.61 | 3.91 | 6.66 | 13.23 | 8.57  |
| 19 | 8.69  | 10.85 | 1.43 | 4.83 | 6.4  | 2.43 | 8.05 | 11.69 | 9.98  |
| 20 | 8.61  | 10.48 | 1.09 | 5.84 | 6.94 | 6.55 | 7.69 | 10.95 | 9.34  |
| 21 | 8.45  | 10.89 | 1.72 | 6.07 | 6.81 | 5.64 | 8.5  | 11.01 | 9.53  |
| 22 | 11.49 | 10.02 | 5.16 | 5.16 | 7.16 | 7.16 | 6.16 | 6.75  | 5.16  |
| 23 | 6.67  | 6.66  | 1.94 | 3.53 | 5.26 | 4.04 | 6.95 | 12.57 | 9.15  |
| 24 | 9.54  | 8.82  | 1.54 | 3.54 | 6.56 | 3.86 | 8.24 | 12.05 | 9.08  |
| 25 | 7.31  | 8.04  | 1.18 | 3.18 | 4.99 | 1.18 | 6.96 | 11.02 | 9.16  |
| 26 | 8.87  | 9.32  | 2.49 | 4.08 | 6.15 | 3.49 | 7.65 | 10.63 | 9.14  |
| 27 | 8.25  | 9.01  | 2.54 | 4.35 | 6.69 | 2.13 | 8.45 | 11.02 | 8.97  |
| 28 | 8.4   | 7.8   | 1    | 6.64 | 8    | 7.67 | 8.62 | 8.6   | 7.11  |
| 29 | 8.28  | 7.65  | 0.86 | 6.92 | 8.4  | 8.22 | 8.59 | 8.87  | 7.14  |
| 30 | 8.19  | 7.38  | 2.77 | 6.63 | 8.47 | 8.34 | 8.38 | 8.65  | 7.19  |
| 31 | 10.14 | 8.01  | 0.01 | 3.33 | 5.05 | 1.01 | 7.53 | 11.04 | 8.28  |
| 32 | 7.68  | 7.12  | 0    | 2.76 | 3.76 | 0    | 7.37 | 9.8   | 7.87  |
| 33 | 7.51  | 7.06  | 0.11 | 2.69 | 4.2  | 0.11 | 6.72 | 11.75 | 8.33  |
| 34 | 7.82  | 7.96  | 1.16 | 3.86 | 4.24 | 0.16 | 8.13 | 10.05 | 7.55  |
| 35 | 10.14 | 8.39  | 0.45 | 6.28 | 7.67 | 7.64 | 8.01 | 7.99  | 6.86  |
| 36 | 7.33  | 7.67  | 1.25 | 5.74 | 7.19 | 7.02 | 7.48 | 8.4   | 7.18  |
| 37 | 7.13  | 7.89  | 0.34 | 5.43 | 6.71 | 6.67 | 7.11 | 8.77  | 7.63  |
| 38 | 8.25  | 6.35  | 0.32 | 6.81 | 7.05 | 7.93 | 8.04 | 7     | 7.88  |
| 39 | 10.65 | 7.01  | 1.34 | 6.09 | 7.69 | 7.44 | 7.66 | 8.82  | 6.29  |
| 40 | 7.92  | 7.1   | 1.1  | 6.68 | 7.25 | 7.18 | 7.64 | 8.48  | 6.52  |
| 41 | 7.8   | 6.8   | 1.31 | 6.06 | 7.48 | 7.17 | 7.4  | 8.49  | 5.98  |
| 42 | 7.7   | 5.22  | 2.41 | 5    | 6.32 | 8.52 | 6.73 | 5     | 8.37  |
| 43 | 10.71 | 8.69  | 2.06 | 6.99 | 8.34 | 8.01 | 8.64 | 9.48  | 7.3   |
| 44 | 8.66  | 7.94  | 0.91 | 7.46 | 8.73 | 8.68 | 8.85 | 9.74  | 7.79  |
| 45 | 7.65  | 9.13  | 2.87 | 6.19 | 7.73 | 7.47 | 8.99 | 10.94 | 8.49  |
| 46 | 8.49  | 8.25  | 0.75 | 7.05 | 8.07 | 8.18 | 8.58 | 9.42  | 7.74  |
| 47 | 12.07 | 8.44  | 1.3  | 7.07 | 7.2  | 7.42 | 8.21 | 9.35  | 7.8   |
| 48 | 8.74  | 8.99  | 0.3  | 8.17 | 7.87 | 7.82 | 8.44 | 9.15  | 7.85  |
| 49 | 7.94  | 8.9   | 1.71 | 8.46 | 8.06 | 7.88 | 8.61 | 9.46  | 8.12  |
| 50 | 8.82  | 7.86  | 0.9  | 8.15 | 7.83 | 8.38 | 8.52 | 8.34  | 8.23  |
| 51 | 8.29  | 6.98  | 1.5  | 5.98 | 6.73 | 6.34 | 7.99 | 8.57  | 9.16  |
| 52 | 6.97  | 7.24  | 2.33 | 5.65 | 6.42 | 6.39 | 8.33 | 10.11 | 8.8   |
| 53 | 8.73  | 6.75  | 3.21 | 6.1  | 6.5  | 6.48 | 8.5  | 9.57  | 8.63  |
| 54 |       |       |      |      |      |      |      |       |       |
| 55 |       |       |      |      |      |      |      |       |       |
| 56 |       |       |      |      |      |      |      |       |       |
| 57 |       |       |      |      |      |      |      |       |       |
| 58 |       |       |      |      |      |      |      |       |       |
| 59 |       |       |      |      |      |      |      |       |       |
| 60 |       |       |      |      |      |      |      |       |       |

<https://mc.manuscriptcentral.com/gut>

1  
2  
3  
4  
5  
6  
7  
8  
9  
10  
11  
12  
13  
14  
15  
16  
17  
18  
19  
20  
21  
22  
23  
24  
25  
26  
27  
28  
29  
30  
31  
32  
33  
34  
35  
36  
37  
38  
39  
40  
41  
42  
43  
44  
45  
46  
47  
48  
49  
50  
51  
52  
53  
54  
55  
56  
57  
58  
59  
60

|       |       |      |      |      |      |      |       |       |
|-------|-------|------|------|------|------|------|-------|-------|
| 7.91  | 7.46  | 2.27 | 6.18 | 6.68 | 6.85 | 8.29 | 9.58  | 8.74  |
| 11.03 | 8.81  | 2.1  | 6.04 | 7.05 | 6.6  | 9.24 | 11.18 | 9.54  |
| 8.84  | 8.61  | 3.46 | 6.01 | 7.07 | 6.81 | 9.19 | 12.25 | 9.67  |
| 7.06  | 7.81  | 2.33 | 5.99 | 6.99 | 6.97 | 8.56 | 10.89 | 9.54  |
| 6.9   | 7.74  | 3.65 | 6.26 | 7.1  | 6.72 | 8.9  | 10.81 | 9.5   |
| 12    | 9.16  | 2.35 | 6.72 | 7.56 | 7.36 | 8.51 | 11.76 | 9.17  |
| 9.93  | 9.99  | 0.84 | 5.01 | 6.51 | 4.75 | 8.97 | 11.23 | 10.07 |
| 9.19  | 9.12  | 0    | 5.44 | 5.89 | 4.56 | 8.71 | 11.45 | 10.34 |
| 11    | 11.05 | 2.33 | 5.74 | 7.03 | 3.74 | 9.32 | 8.54  | 9.8   |
| 10.11 | 7.76  | 0.76 | 5.41 | 5.62 | 4.57 | 8.54 | 13.83 | 11.05 |
| 9.33  | 8.73  | 2.49 | 5.29 | 6.14 | 5.34 | 9.11 | 13.52 | 9.85  |
| 6.91  | 8.38  | 1.38 | 5.38 | 6.17 | 5.24 | 9.11 | 13.59 | 9.83  |
| 7.03  | 7.76  | 2.06 | 4.15 | 5.06 | 4.82 | 8.54 | 13.47 | 10.23 |
| 9.71  | 8.1   | 1.8  | 5.06 | 6.72 | 5.94 | 8.91 | 12.64 | 8.75  |
| 7.95  | 7.68  | 2.09 | 4.26 | 5.24 | 2.68 | 9.07 | 13.14 | 9.52  |
| 9.38  | 9.1   | 0.15 | 5.35 | 7.04 | 6.1  | 9.07 | 10.97 | 8.66  |
| 13.53 | 9.79  | 1    | 4.9  | 6.28 | 2.32 | 9.1  | 12.01 | 8.16  |
| 9.52  | 8.35  | 0.67 | 3.99 | 5.52 | 2.67 | 8.02 | 13.24 | 9.01  |
| 9.51  | 9.41  | 1.52 | 4.77 | 5.61 | 3.33 | 8.68 | 12.23 | 8.6   |
| 11.36 | 9.12  | 0.93 | 2.74 | 5.21 | 1.51 | 8.46 | 11.62 | 9.21  |
| 8.45  | 6.93  | 1.54 | 4.07 | 4    | 3.13 | 6.71 | 13.12 | 9.07  |
| 7.29  | 5.57  | 0    | 1.8  | 2.48 | 2.8  | 5.73 | 13.19 | 9.27  |
| 8     | 8.43  | 1.11 | 4.28 | 6.66 | 6.19 | 8.74 | 12.09 | 8.64  |
| 7.7   | 8.36  | 0.93 | 4.25 | 6.36 | 6.14 | 8.44 | 12.67 | 9.06  |
| 10    | 9.67  | 4.15 | 5.15 | 5.96 | 5.47 | 9.17 | 9.45  | 9.26  |
| 12.92 | 9.26  | 0.36 | 4.06 | 6.74 | 1.36 | 7.64 | 9.19  | 8.42  |
| 8.52  | 8.62  | 0.79 | 4.7  | 5.31 | 4.7  | 7.91 | 10.09 | 8.27  |
| 6.07  | 8.23  | 0    | 4.46 | 4.76 | 3.46 | 7.96 | 9.65  | 8.72  |
| 9.23  | 9.3   | 1.9  | 4.9  | 5.6  | 1.9  | 9.27 | 9.92  | 6.15  |
| 7.82  | 7.15  | 1.76 | 6.15 | 7.51 | 7.59 | 7.82 | 8.31  | 6.01  |
| 7.32  | 6.81  | 0.72 | 5.93 | 7.33 | 7.35 | 7.21 | 8.55  | 7     |
| 7.69  | 6.99  | 1.88 | 6.82 | 7.36 | 7.38 | 7.73 | 8.31  | 6.95  |
| 7.38  | 6.66  | 2.54 | 6.04 | 7.15 | 7.42 | 7.56 | 8.42  | 6.93  |
| 10.6  | 6.79  | 1.36 | 5    | 6.31 | 5.94 | 7.07 | 12.11 | 7.31  |
| 7.78  | 7.07  | 0.66 | 5.36 | 6.73 | 6.63 | 7.44 | 10.25 | 7.22  |
| 7.32  | 6.4   | 1.77 | 5.05 | 6.6  | 6.24 | 7.41 | 10.32 | 6.9   |
| 6.83  | 7.16  | 2.17 | 5.1  | 6.56 | 6.33 | 7.83 | 9.76  | 6.9   |
| 14.28 | 9.01  | 0.35 | 3.68 | 6.26 | 2.35 | 6.35 | 10.32 | 7.89  |
| 8.13  | 8.49  | 2.46 | 4.78 | 5.71 | 5.05 | 7.67 | 11.66 | 9.35  |
| 8.6   | 10.25 | 0.42 | 2.42 | 6.85 | 2.74 | 7.49 | 13.05 | 9.98  |
| 11    | 12.04 | 2.23 | 2.23 | 8.32 | 3.82 | 7.28 | 11.26 | 9.78  |
| 10.72 | 8.96  | 2.18 | 4.98 | 6.79 | 6.01 | 8    | 12.61 | 9.67  |
| 11.05 | 11.51 | 5.51 | 4.51 | 8.51 | 6.51 | 7.32 | 10.46 | 8.6   |
| 9.31  | 8.76  | 0.87 | 3.57 | 4.51 | 2.87 | 7.78 | 12.47 | 9.26  |
| 9.52  | 8.21  | 1.52 | 3.39 | 5.02 | 1.94 | 7.47 | 12.39 | 9.98  |
| 3     | 5.89  | 0.68 | 2.68 | 2.68 | 3    | 5.27 | 11.82 | 8.88  |
| 8.12  | 9.4   | 1.57 | 5.6  | 6.52 | 5.66 | 8.21 | 10.94 | 8.54  |
| 8.29  | 8.94  | 1.28 | 4.08 | 5.45 | 2.6  | 7.84 | 12.3  | 8.84  |
| 8.16  | 8.92  | 2.84 | 5.72 | 6.9  | 5.78 | 8.54 | 11.97 | 8.31  |
| 10.94 | 8.06  | 0    | 4.1  | 4.62 | 3.82 | 8.22 | 10.66 | 8.36  |
| 8.74  | 7.21  | 0.53 | 4.53 | 5.74 | 5.85 | 7.58 | 9.8   | 7.98  |
| 8.44  | 7.48  | 0    | 4.83 | 5.59 | 5.92 | 7.55 | 9.71  | 7.79  |

<https://mc.manuscriptcentral.com/gut>

1  
2  
3  
4  
5  
6  
7  
8  
9  
10  
11  
12  
13  
14  
15  
16  
17  
18  
19  
20  
21  
22  
23  
24  
25  
26  
27  
28  
29  
30  
31  
32  
33  
34  
35  
36  
37  
38  
39  
40  
41  
42  
43  
44  
45  
46  
47  
48  
49  
50  
51  
52  
53  
54  
55  
56  
57  
58  
59  
60

|       |      |      |      |      |      |      |       |      |
|-------|------|------|------|------|------|------|-------|------|
| 8.6   | 7.58 | 0.79 | 0.79 | 3.6  | 3.11 | 8.15 | 9.05  | 8.49 |
| 8.72  | 6.85 | 1.1  | 3.1  | 5.42 | 5.42 | 6.8  | 9.24  | 7.71 |
| 7.57  | 5.63 | 0.59 | 2.17 | 5.49 | 5.11 | 6.29 | 11.24 | 7.67 |
| 6.57  | 5.01 | 0.49 | 3.66 | 4.39 | 4.81 | 5.98 | 11.54 | 8.11 |
| 7.91  | 7.01 | 1.55 | 5.64 | 8.05 | 7.17 | 7.78 | 8.24  | 7.05 |
| 9.42  | 8.62 | 0.57 | 3.65 | 5.32 | 1.15 | 8.36 | 11.01 | 8.39 |
| 6.03  | 8.37 | 0    | 2.39 | 4.8  | 3.32 | 7.06 | 10.56 | 8.5  |
| 5.64  | 8.37 | 0    | 2.67 | 4.64 | 1.94 | 6.73 | 10.67 | 8.44 |
| 7.72  | 7.09 | 0.27 | 6.46 | 8.03 | 7.97 | 8.06 | 8.62  | 6.75 |
| 8.9   | 8.17 | 0    | 5.55 | 7.1  | 7.07 | 7.55 | 10.2  | 7.72 |
| 11.68 | 8.78 | 0    | 0    | 5.74 | 2.82 | 8.47 | 12.4  | 8.25 |
| 7.76  | 7.3  | 0.89 | 4.7  | 6.14 | 5.75 | 8.65 | 12.68 | 8.17 |
| 9.29  | 8.68 | 0.3  | 3.11 | 6.11 | 3.11 | 8.81 | 12.14 | 8.31 |
| 8.93  | 8.65 | 1.71 | 3.71 | 6.34 | 5.37 | 9.61 | 11.79 | 7.67 |
| 8.5   | 9.34 | 2.54 | 2.54 | 6.24 | 3.54 | 7.35 | 9.36  | 8.85 |
| 7.96  | 9.5  | 0    | 4.26 | 6.37 | 4.89 | 8.24 | 10.6  | 8.43 |
| 8.33  | 8.59 | 0    | 5.14 | 6.53 | 6.09 | 8.52 | 11.08 | 7.97 |
| 7.84  | 9.85 | 0.75 | 4.15 | 6.65 | 4.4  | 8.04 | 10.38 | 8.37 |

1  
2  
3  
4  
5  
6  
7  
8  
9  
10  
11  
12  
13  
14  
15  
16  
17  
18  
19  
20  
21  
22  
23  
24  
25  
26  
27  
28  
29  
30  
31  
32  
33  
34  
35  
36  
37  
38  
39  
40  
41  
42  
43  
44  
45  
46  
47  
48  
49  
50  
51  
52  
53  
54  
55  
56  
57  
58  
59  
60

| CD34 | CD36 | CD44  | CD46  | CD82 | CDC42 | CDH1  | CDH11 | CDH13 |
|------|------|-------|-------|------|-------|-------|-------|-------|
| 7    | 8.39 | 10.09 | 9.21  | 8.16 | 10.05 | 9.33  | 8.86  | 6.84  |
| 7.1  | 8.77 | 10.63 | 10.25 | 8.59 | 10.47 | 10.8  | 8.44  | 6.82  |
| 7.09 | 8.28 | 10.77 | 10.03 | 8.7  | 10.51 | 10.53 | 8.07  | 7.16  |
| 7.87 | 8.76 | 11.92 | 10.56 | 8.92 | 10.43 | 10.69 | 9.3   | 7.14  |
| 7.99 | 8.33 | 11.76 | 8.02  | 9.04 | 9.7   | 5.4   | 8.14  | 7.93  |
| 7.17 | 7.08 | 10.76 | 10.18 | 8.24 | 9.99  | 9.48  | 9.1   | 6.73  |
| 7.44 | 7.19 | 10.91 | 10.17 | 8.23 | 10.11 | 9.68  | 8.74  | 6.71  |
| 6.95 | 6.44 | 13.11 | 10.52 | 9.02 | 9.94  | 10.43 | 9.67  | 6.12  |
| 6.97 | 7.19 | 12.87 | 9.81  | 8.48 | 10.69 | 10.29 | 9.34  | 6.25  |
| 6.23 | 6.18 | 10.51 | 10.03 | 7.96 | 10.88 | 10.82 | 8.91  | 6.75  |
| 6.49 | 6.24 | 11.92 | 10.41 | 8.16 | 11.23 | 11.18 | 8.79  | 5.29  |
| 7.58 | 6.99 | 11.52 | 10.49 | 8.17 | 11.16 | 11.08 | 9.34  | 5.44  |
| 6.99 | 7.07 | 10.4  | 10.98 | 8.07 | 10.23 | 10.89 | 8.75  | 6.64  |
| 7.94 | 7.86 | 10.61 | 10.54 | 8.33 | 10.36 | 10.35 | 9.64  | 7.1   |
| 7.29 | 7.52 | 13.23 | 10.36 | 9.72 | 9.71  | 10.45 | 9.87  | 6.16  |
| 7.19 | 7.56 | 10.94 | 9.92  | 8.99 | 10.69 | 10.26 | 9.19  | 7.43  |
| 7.22 | 7.61 | 10.75 | 10.23 | 8.74 | 10.99 | 11.05 | 9.33  | 7.29  |
| 7.66 | 8.4  | 10.83 | 9.77  | 9.1  | 10.38 | 10.96 | 9.59  | 8.03  |
| 8.13 | 9.06 | 13.67 | 10.07 | 9.52 | 10.2  | 10.91 | 8.93  | 6.09  |
| 8.21 | 7.59 | 11.44 | 10.57 | 9.13 | 10.95 | 11.39 | 9.17  | 5.46  |
| 8.59 | 8.46 | 12.62 | 10.21 | 8.9  | 10.63 | 10.51 | 8.98  | 6.07  |
| 7.51 | 8.03 | 11.6  | 11.33 | 9.32 | 10.8  | 10.54 | 10.26 | 7.9   |
| 7.25 | 7.99 | 11.64 | 11.62 | 9.26 | 10.86 | 10.77 | 9.61  | 7.03  |
| 6.85 | 7.57 | 11.56 | 11.41 | 8.99 | 10.79 | 10.46 | 10.15 | 5.18  |
| 6.38 | 7.52 | 10.11 | 9.49  | 6.58 | 10.26 | 11.43 | 6.89  | 5.23  |
| 6.84 | 6.49 | 11.46 | 10.67 | 7.99 | 11.21 | 12.15 | 7.21  | 5.77  |
| 7.13 | 6.33 | 11.68 | 10.6  | 8.06 | 11.1  | 12.17 | 7     | 6.11  |
| 7.26 | 7.19 | 10.96 | 10.33 | 8.34 | 10.74 | 11.58 | 7.57  | 6.75  |
| 6.94 | 7.5  | 11.13 | 9.92  | 9.15 | 9.87  | 11.46 | 7.66  | 7.38  |
| 7.48 | 7.49 | 11.25 | 9.61  | 9.36 | 10.39 | 10.45 | 8     | 6.96  |
| 7.3  | 7.02 | 10.75 | 10.28 | 9.52 | 10.21 | 11.15 | 7.96  | 7.02  |
| 7.67 | 8.23 | 11.32 | 9.39  | 9.42 | 9.64  | 10.35 | 8.57  | 7.6   |
| 6.59 | 8.53 | 11.21 | 9.26  | 8.63 | 9.87  | 6.57  | 7.66  | 7.22  |
| 7.87 | 7.42 | 11.56 | 10.87 | 7.79 | 10.41 | 11.33 | 10.74 | 6.45  |
| 7.69 | 6.89 | 11.47 | 11.09 | 8.29 | 10.51 | 11.64 | 9.25  | 6.77  |
| 7.25 | 8.02 | 11.63 | 10.85 | 8.14 | 10.25 | 11.35 | 10.22 | 6.28  |
| 5.49 | 5.94 | 11.77 | 9.1   | 8.5  | 10.15 | 8.43  | 7.43  | 4.25  |
| 5.73 | 5.61 | 11.42 | 9.68  | 8.55 | 10.37 | 9.51  | 7.95  | 4.76  |
| 6.61 | 5.98 | 11.42 | 9.26  | 8.69 | 10.01 | 7.53  | 8.8   | 5.41  |
| 6.42 | 6.12 | 11.31 | 9.59  | 8    | 10.21 | 8.28  | 8.5   | 4.44  |
| 6.83 | 7.76 | 9.3   | 8.87  | 8.18 | 9.47  | 8.53  | 8.17  | 6.63  |
| 6.76 | 7.22 | 9.21  | 9.33  | 8.15 | 9.57  | 9.08  | 8.45  | 6.61  |
| 6.77 | 7.23 | 8.86  | 8.8   | 8.25 | 9.46  | 8.84  | 8.12  | 6.33  |
| 5.96 | 6.71 | 9.22  | 9.56  | 8.24 | 9.73  | 9.6   | 8.53  | 6.08  |
| 5.86 | 7.67 | 12.42 | 7.81  | 7.61 | 9.05  | 11.49 | 7.11  | 6.45  |
| 6.72 | 7.21 | 10.58 | 9.84  | 8.15 | 10.43 | 11.48 | 8.34  | 5.22  |
| 7.02 | 7.31 | 10.66 | 9.78  | 7.83 | 10.54 | 11.46 | 9.25  | 6.13  |
| 6.92 | 6.65 | 10.62 | 9.69  | 7.39 | 10.39 | 10.73 | 10.31 | 5.9   |
| 7.22 | 7.87 | 11.79 | 10.39 | 8.09 | 10.96 | 11.88 | 9.62  | 6.52  |
| 7.22 | 6.76 | 11.23 | 10.41 | 7.62 | 11.21 | 11.76 | 9.98  | 6.2   |
| 6.9  | 6.74 | 11.14 | 10.55 | 7.44 | 10.99 | 11.8  | 8.96  | 5.2   |

<https://mc.manuscriptcentral.com/gut>



|    |       |      |       |       |       |       |       |       |      |
|----|-------|------|-------|-------|-------|-------|-------|-------|------|
| 1  |       |      |       |       |       |       |       |       |      |
| 2  | 7.35  | 6.9  | 11.23 | 10.58 | 7.54  | 11.19 | 11.57 | 10.23 | 5.83 |
| 3  | 6.98  | 7.9  | 10.59 | 11.1  | 8.43  | 10.47 | 11.22 | 8.16  | 6.97 |
| 4  | 7.49  | 7.47 | 10.71 | 11.1  | 8.14  | 10.7  | 10.91 | 8.74  | 7.22 |
| 5  | 7.25  | 7.19 | 10.99 | 10.94 | 8.34  | 10.69 | 11.28 | 8.31  | 6.91 |
| 6  | 7.29  | 7.54 | 10.79 | 10.9  | 8     | 10.6  | 10.87 | 8.84  | 6.72 |
| 7  |       |      |       |       |       |       |       |       |      |
| 8  | 6.84  | 8.16 | 12.26 | 10.46 | 8.55  | 11.39 | 11.59 | 8.11  | 5.59 |
| 9  | 7.49  | 7.04 | 11.74 | 10.7  | 8.7   | 11.56 | 12.21 | 8.12  | 6.38 |
| 10 | 6.22  | 5.76 | 11.76 | 10.66 | 8.6   | 11.83 | 12.34 | 7.25  | 5.36 |
| 11 | 7.19  | 6.69 | 12.48 | 10.9  | 8.37  | 11.51 | 12.26 | 8.57  | 6.19 |
| 12 | 6.74  | 6.65 | 11.34 | 10.42 | 6.46  | 10.8  | 10.77 | 7.94  | 5.42 |
| 13 | 6.59  | 6.21 | 11.21 | 11.02 | 8.13  | 10.89 | 10.37 | 8.27  | 6.21 |
| 14 | 6.44  | 5.7  | 10.71 | 10.84 | 7.47  | 10.88 | 10.4  | 8.22  | 6.04 |
| 15 | 6.81  | 6.07 | 10.86 | 10.64 | 7.17  | 10.99 | 10.08 | 8.75  | 5.26 |
| 16 |       |      |       |       |       |       |       |       |      |
| 17 | 10.11 | 8.15 | 16.33 | 9.47  | 12.13 | 9.06  | 8.32  | 8.61  | 8.61 |
| 18 | 8.34  | 7.9  | 13.73 | 9.34  | 9.79  | 9.37  | 8.93  | 8.7   | 8.16 |
| 19 | 7.87  | 7.68 | 12.11 | 9.59  | 8.9   | 9.68  | 8.39  | 8.93  | 7.57 |
| 20 | 9.24  | 9.63 | 10.68 | 8.19  | 10.56 | 9.69  | 6.74  | 9.29  | 9.62 |
| 21 | 9.05  | 9.97 | 11.12 | 8.04  | 10.5  | 9.44  | 6.9   | 9.44  | 9.46 |
| 22 |       |      |       |       |       |       |       |       |      |
| 23 | 6.35  | 7.05 | 8.37  | 10.27 | 8.79  | 10.51 | 11.26 | 7.61  | 7.37 |
| 24 | 6.52  | 6.94 | 7.87  | 10.41 | 8.91  | 10.73 | 11.69 | 7.37  | 7.23 |
| 25 | 6.97  | 7.52 | 9.07  | 10.18 | 8.9   | 10.33 | 11.1  | 8.15  | 7.25 |
| 26 | 7.74  | 6.8  | 11.1  | 11.27 | 9.2   | 10.78 | 11.63 | 9.53  | 5.31 |
| 27 | 7.79  | 7.02 | 10.87 | 11.04 | 8.69  | 11    | 11.55 | 9.19  | 6.21 |
| 28 | 8.07  | 8.26 | 10.43 | 10.63 | 8.39  | 10.66 | 10.62 | 9.38  | 6.98 |
| 29 | 7.14  | 7.75 | 10.72 | 11.66 | 9.47  | 11.49 | 11.82 | 9.15  | 6.22 |
| 30 | 7.26  | 7.46 | 10.7  | 12.05 | 9.63  | 11.59 | 11.67 | 10    | 6.4  |
| 31 | 7.47  | 7.92 | 11.1  | 12.18 | 9.82  | 11.42 | 11.74 | 10.1  | 6.92 |
| 32 | 6.87  | 7.13 | 9.88  | 10.47 | 8.19  | 10.4  | 9.62  | 8.83  | 6.94 |
| 33 |       |      |       |       |       |       |       |       |      |
| 34 | 7.26  | 7.16 | 9.91  | 10.56 | 7.84  | 10.37 | 9.47  | 9.23  | 6.55 |
| 35 | 7.07  | 7.36 | 10.15 | 10.33 | 8     | 10.23 | 9.38  | 9.07  | 6.64 |
| 36 | 7.95  | 9.1  | 10.49 | 11.48 | 8.93  | 10.67 | 11.3  | 8.96  | 7.39 |
| 37 | 7.24  | 7.82 | 10.04 | 11.59 | 9.23  | 11    | 11.38 | 8.5   | 7.15 |
| 38 | 7.47  | 8.11 | 10.28 | 11.29 | 9.2   | 10.68 | 11.33 | 8.3   | 7.47 |
| 39 | 7.16  | 7.45 | 11.19 | 10.28 | 8.3   | 10.8  | 10.27 | 9.94  | 7.02 |
| 40 | 7.14  | 7.35 | 11.39 | 10.25 | 8.51  | 10.88 | 10.66 | 9.4   | 6.98 |
| 41 | 7.45  | 7.67 | 11.54 | 10.25 | 8.55  | 10.7  | 10.08 | 9.91  | 7.51 |
| 42 | 7.37  | 8.27 | 10.7  | 9.64  | 8.67  | 10.15 | 9.02  | 9.25  | 7.22 |
| 43 |       |      |       |       |       |       |       |       |      |
| 44 | 7.37  | 8.27 | 10.7  | 9.64  | 8.67  | 10.15 | 9.02  | 9.25  | 7.22 |
| 45 | 7.62  | 7.62 | 10.75 | 9.86  | 9.22  | 10.3  | 10.1  | 9.05  | 6.99 |
| 46 | 7.69  | 7.93 | 10.96 | 9.82  | 8.82  | 10.31 | 9.92  | 9.25  | 7.19 |
| 47 | 7.95  | 8.17 | 10.41 | 10.11 | 9     | 10.36 | 9.84  | 10.62 | 6.95 |
| 48 | 7.54  | 8.82 | 10.22 | 8.87  | 8.11  | 9.87  | 8.85  | 8.32  | 7.45 |
| 49 | 7.57  | 8.19 | 10.92 | 9.99  | 8.33  | 10.35 | 10.44 | 9.45  | 7.26 |
| 50 | 7.75  | 8.31 | 10.25 | 10.36 | 8.34  | 10.6  | 10.85 | 9.17  | 6.85 |
| 51 | 7.78  | 8.47 | 10.65 | 9.47  | 8.11  | 10.2  | 9.94  | 9.14  | 7.04 |
| 52 | 6.81  | 6.74 | 12.23 | 10.95 | 8.35  | 11.42 | 11.84 | 9.99  | 6.03 |
| 53 | 7     | 6.42 | 11.81 | 10.88 | 8.43  | 11.47 | 12.31 | 8.53  | 6.54 |
| 54 | 7.35  | 7.7  | 13.27 | 10.46 | 9.02  | 10.97 | 11.69 | 9.71  | 6.1  |
| 55 | 7.77  | 8.23 | 10.42 | 8.86  | 8.24  | 9.79  | 5.77  | 8.61  | 7.22 |
| 56 | 7.91  | 8.11 | 10.48 | 9.46  | 8.64  | 9.89  | 7.47  | 9.94  | 7.41 |
| 57 | 7.74  | 7.75 | 10.32 | 9.71  | 8.62  | 9.72  | 7.35  | 10.13 | 6.8  |
| 58 |       |      |       |       |       |       |       |       |      |
| 59 | 6.98  | 7.54 | 10.5  | 9.27  | 8.28  | 9.96  | 10.68 | 8.83  | 6.95 |
| 60 |       |      |       |       |       |       |       |       |      |

1  
2  
3  
4  
5  
6  
7  
8  
9  
10  
11  
12  
13  
14  
15  
16  
17  
18  
19  
20  
21  
22  
23  
24  
25  
26  
27  
28  
29  
30  
31  
32  
33  
34  
35  
36  
37  
38  
39  
40  
41  
42  
43  
44  
45  
46  
47  
48  
49  
50  
51  
52  
53  
54  
55  
56  
57  
58  
59  
60

|      |      |       |       |       |       |       |       |      |
|------|------|-------|-------|-------|-------|-------|-------|------|
| 7.08 | 7.36 | 10.52 | 9.82  | 8.37  | 9.96  | 10.89 | 9.04  | 6.91 |
| 8.12 | 8.2  | 11.35 | 8.59  | 8.6   | 9.63  | 9.6   | 9.2   | 7.65 |
| 7.06 | 8.04 | 10.97 | 10.26 | 8.61  | 9.99  | 10.48 | 8.46  | 6.51 |
| 7.71 | 7.38 | 11.62 | 11.03 | 9.6   | 11.03 | 11.14 | 9.35  | 7.94 |
| 8.56 | 7.7  | 10.87 | 10.7  | 8.88  | 10.52 | 10.64 | 10.28 | 7.06 |
| 7.15 | 7.3  | 13.05 | 9.71  | 8.48  | 10.6  | 10.49 | 9.2   | 5.62 |
| 6.1  | 5.8  | 12.01 | 10.9  | 8.11  | 11.11 | 11.56 | 9.36  | 6.36 |
| 6.82 | 6.6  | 11.58 | 10.77 | 7.71  | 11.27 | 11.3  | 9.55  | 6.04 |
| 7.58 | 7.49 | 15.79 | 9.71  | 9.62  | 10.2  | 11.23 | 9.93  | 7.58 |
| 7.08 | 7.38 | 12.41 | 10.25 | 9.53  | 9.99  | 11.76 | 8.57  | 5.55 |
| 6.35 | 5.81 | 11.36 | 10.88 | 8.78  | 10.37 | 11.6  | 8.65  | 5.58 |
| 6.69 | 7.03 | 10.1  | 10.37 | 8.35  | 10.28 | 11.07 | 8.01  | 6.49 |
| 5.96 | 6.72 | 14.58 | 9.88  | 9.82  | 9.52  | 11.56 | 10.09 | 7.26 |
| 8.69 | 8.99 | 9.04  | 8.68  | 9.33  | 9.88  | 5.76  | 8.88  | 8.68 |
| 6.53 | 6.58 | 10.09 | 10.76 | 8.11  | 10.22 | 10.86 | 9.26  | 6.41 |
| 6.64 | 6.17 | 10.1  | 10.88 | 8.21  | 10.29 | 10.99 | 8.23  | 6.43 |
| 6.67 | 6.66 | 9.92  | 10.8  | 8.04  | 10.18 | 10.91 | 8.79  | 5.43 |
| 6.2  | 7.24 | 10.77 | 10.3  | 8.76  | 10.36 | 10.29 | 9.05  | 4.76 |
| 6.08 | 7.01 | 10.55 | 9.67  | 8.44  | 9.76  | 8.76  | 9.1   | 6.67 |
| 6.07 | 6.94 | 11.16 | 10.03 | 8.63  | 10.01 | 9.2   | 8.99  | 6.27 |
| 8.16 | 6.16 | 17.96 | 6.16  | 10.41 | 7.75  | 9.25  | 7.16  | 8.75 |
| 6.29 | 5.64 | 11.41 | 9.87  | 8.33  | 11.26 | 12.27 | 7.61  | 5.9  |
| 6.98 | 6.34 | 11.48 | 9.96  | 8.41  | 10.89 | 11.77 | 8.64  | 5.49 |
| 6.35 | 5.57 | 12.41 | 9.61  | 9.32  | 10.07 | 11.9  | 9.06  | 6.43 |
| 6.99 | 7.51 | 13.22 | 9.27  | 9.59  | 9.84  | 11.68 | 9.23  | 6.93 |
| 8.13 | 8.01 | 11.56 | 9.89  | 8.45  | 10.2  | 10.86 | 10.7  | 6.27 |
| 7.74 | 8.26 | 9.54  | 7.85  | 8.66  | 9.4   | 7.37  | 8.37  | 8.04 |
| 7.81 | 8.65 | 8.24  | 8.22  | 8.57  | 9.59  | 4.86  | 8.37  | 8.5  |
| 7.65 | 8.38 | 6.9   | 7.38  | 8.26  | 9.31  | 3.35  | 8.52  | 7.74 |
| 6.78 | 7.62 | 9.39  | 9.54  | 7.56  | 9.63  | 9.9   | 9.38  | 4.1  |
| 7.64 | 6.28 | 10.45 | 9.1   | 7.53  | 9.61  | 8.99  | 10.15 | 5.98 |
| 6.69 | 6.02 | 10.61 | 9.34  | 8.03  | 9.38  | 9.83  | 9.26  | 5.11 |
| 7.88 | 8.52 | 10.02 | 9.23  | 7.07  | 9.72  | 8.47  | 10.26 | 5.28 |
| 6.93 | 7.65 | 9.29  | 6.83  | 8.41  | 8.69  | 6.12  | 7.6   | 7.62 |
| 6.73 | 7.57 | 8.26  | 6.73  | 7.85  | 8.84  | 7.64  | 7.02  | 6.69 |
| 6.44 | 7.26 | 8.55  | 7.17  | 7.94  | 8.55  | 8.38  | 7.21  | 7.18 |
| 8.13 | 8.35 | 7.4   | 7.01  | 8.95  | 9.02  | 5.21  | 8.13  | 8.17 |
| 6.98 | 7.58 | 8.1   | 7.09  | 7.78  | 8.74  | 4.92  | 7.34  | 7.22 |
| 7.27 | 7.29 | 7.87  | 6.65  | 7.65  | 8.69  | 5.1   | 7.49  | 7.42 |
| 6.91 | 7.56 | 7.92  | 7.04  | 7.68  | 8.84  | 5.7   | 7.61  | 7.34 |
| 9.6  | 7.87 | 8.75  | 5.73  | 9.85  | 6.22  | 5     | 8.66  | 7.58 |
| 7.99 | 8.4  | 9.45  | 7.7   | 8.43  | 9.41  | 6.58  | 8.48  | 8.46 |
| 8.15 | 8.74 | 7.83  | 8.13  | 9.03  | 9.72  | 5.33  | 8.69  | 8.63 |
| 6.82 | 7.86 | 9.79  | 8.38  | 8.51  | 9.38  | 9.8   | 8.2   | 7.19 |
| 7.89 | 8.28 | 9.08  | 7.78  | 8.68  | 9.42  | 7.71  | 8.27  | 7.99 |
| 7.54 | 8.35 | 10.61 | 8.72  | 8.52  | 9.48  | 8.64  | 8.2   | 7.73 |
| 8.28 | 9.28 | 9.77  | 8.48  | 8.77  | 9.7   | 6.92  | 8.57  | 8.24 |
| 8.45 | 9.36 | 7.2   | 8.38  | 8.44  | 9.91  | 5.17  | 8.44  | 7.84 |
| 9.08 | 9.28 | 9.88  | 8.1   | 9.24  | 9.7   | 6.15  | 8.67  | 8.73 |
| 6.51 | 7.35 | 9.62  | 9.82  | 6.89  | 10.21 | 9.68  | 8.25  | 5.91 |
| 6.9  | 7.37 | 10.42 | 10.07 | 6.9   | 10.29 | 9.96  | 8.54  | 5.81 |
| 7.24 | 7.87 | 10.3  | 9.81  | 7.45  | 10.24 | 9.72  | 8.36  | 6.83 |

<https://mc.manuscriptcentral.com/gut>

|    |      |      |       |       |       |       |       |       |      |
|----|------|------|-------|-------|-------|-------|-------|-------|------|
| 1  |      |      |       |       |       |       |       |       |      |
| 2  | 7.01 | 7.9  | 9.82  | 9.78  | 7.5   | 10.49 | 9.74  | 8.4   | 6.9  |
| 3  | 7.62 | 7.94 | 10.52 | 11.35 | 9.19  | 10.66 | 9.72  | 9.67  | 6.76 |
| 4  | 7.85 | 8.72 | 10.4  | 11.09 | 9.29  | 10.74 | 10.16 | 9.59  | 6.98 |
| 5  | 7.23 | 7.84 | 9.43  | 10.84 | 9.15  | 10.77 | 9.88  | 8.65  | 6.91 |
| 6  | 7.34 | 8.19 | 9.79  | 10.89 | 9.11  | 10.76 | 9.85  | 8.62  | 6.69 |
| 7  | 7.51 | 8.52 | 11.18 | 10.54 | 8.86  | 10.8  | 10.4  | 9.4   | 6.89 |
| 8  | 7.38 | 8.07 | 12.96 | 10.73 | 9.91  | 11.37 | 10.95 | 9.12  | 6.6  |
| 9  | 7.05 | 7.3  | 11.86 | 11.12 | 9.32  | 11.73 | 11.23 | 8.55  | 6.19 |
| 10 | 8.45 | 8.32 | 13.34 | 10.36 | 9.51  | 10.81 | 9.95  | 9.43  | 6.5  |
| 11 | 7.69 | 8.62 | 10.78 | 10.76 | 9.97  | 10.66 | 12.81 | 9.57  | 7.75 |
| 12 | 7.81 | 8.21 | 10.78 | 10.86 | 9.22  | 10.62 | 12.24 | 9.93  | 7.41 |
| 13 | 7.75 | 7.67 | 11.15 | 10.77 | 9.47  | 10.58 | 12.47 | 10.2  | 7.36 |
| 14 | 8.01 | 8.39 | 10.84 | 11.03 | 9.41  | 10.4  | 12.65 | 9.44  | 7.28 |
| 15 | 6.65 | 7.27 | 10.94 | 10.05 | 10.78 | 10.97 | 11.2  | 8.34  | 6.3  |
| 16 | 7.2  | 7.35 | 11.53 | 10.56 | 10.97 | 11.34 | 11.88 | 8.49  | 5.66 |
| 17 | 8.05 | 7.64 | 12.39 | 9.4   | 10.12 | 10.25 | 10.2  | 9.41  | 6.59 |
| 18 | 7.6  | 9.12 | 11.81 | 10.01 | 8.22  | 10.35 | 9.63  | 9.36  | 4.7  |
| 19 | 6.95 | 7.93 | 11.89 | 10.5  | 8.68  | 10.62 | 11.02 | 9.68  | 5.52 |
| 20 | 7.69 | 8    | 11.76 | 10.4  | 8.59  | 10.5  | 10.13 | 10.12 | 6.16 |
| 21 | 7.01 | 8.24 | 10.43 | 10.68 | 7.73  | 10.59 | 11.42 | 8.62  | 5.1  |
| 22 | 6.73 | 4.94 | 10.67 | 10.86 | 8.21  | 10.32 | 10.94 | 9.82  | 6.57 |
| 23 | 6.26 | 3.18 | 10.9  | 11.28 | 8.16  | 10.37 | 11.78 | 8.33  | 5.59 |
| 24 | 7.33 | 7.04 | 10.47 | 10.11 | 9.17  | 10.35 | 11.12 | 9.43  | 6.72 |
| 25 | 7.27 | 6.84 | 10.25 | 10.54 | 9.32  | 10.67 | 12    | 9.3   | 7    |
| 26 | 7.91 | 7.06 | 13.89 | 9.64  | 10.91 | 9.1   | 11.53 | 10.35 | 7.32 |
| 27 | 6.01 | 6.68 | 10.51 | 9.26  | 7.22  | 9.52  | 8.53  | 7.62  | 3.95 |
| 28 | 6.38 | 6.55 | 9.84  | 9.54  | 7.46  | 9.69  | 9.04  | 8.41  | 5.96 |
| 29 | 6.12 | 5.57 | 8.99  | 9.76  | 6.91  | 9.64  | 9.49  | 8.39  | 5.65 |
| 30 | 6.29 | 7.19 | 9.48  | 10.19 | 6.81  | 10.6  | 8.48  | 8.68  | 4.22 |
| 31 | 7.01 | 7.18 | 8.02  | 7.12  | 7.43  | 8.88  | 5.34  | 7.34  | 7.46 |
| 32 | 6.83 | 6.67 | 10.43 | 7.36  | 7.59  | 8.56  | 6.97  | 7.35  | 7.06 |
| 33 | 7.11 | 6.69 | 7.22  | 7.05  | 7.42  | 8.96  | 4.69  | 7.6   | 7.09 |
| 34 | 6.96 | 7.11 | 8.76  | 6.79  | 7.48  | 8.58  | 5.2   | 7.45  | 7.57 |
| 35 | 5.79 | 6.76 | 9.38  | 8.64  | 7.93  | 9.18  | 10.02 | 6.96  | 5.96 |
| 36 | 6.47 | 7.04 | 8.97  | 8.99  | 7.54  | 8.86  | 9.08  | 7.35  | 6.53 |
| 37 | 6.95 | 6.92 | 8.86  | 8.92  | 7.69  | 8.92  | 8.91  | 7.98  | 6.41 |
| 38 | 6.71 | 6.85 | 9.48  | 8.59  | 7.5   | 9.06  | 8.78  | 8.7   | 6.31 |
| 39 | 6.24 | 7.15 | 11.91 | 9.56  | 8.97  | 10.94 | 7.78  | 7.57  | 3.35 |
| 40 | 7.29 | 6.59 | 11.24 | 10.3  | 8.83  | 10.47 | 11.67 | 8.75  | 6.63 |
| 41 | 7.23 | 7.66 | 11.98 | 10.17 | 8.95  | 10.67 | 11.48 | 8.07  | 5.81 |
| 42 | 7.19 | 7.28 | 14.75 | 8.86  | 10.17 | 9.23  | 10.99 | 8.54  | 6.23 |
| 43 | 6.53 | 7.79 | 10.25 | 10.32 | 8.17  | 10.31 | 11.56 | 8.48  | 6.77 |
| 44 | 6.83 | 7.83 | 15.01 | 7.97  | 9.76  | 9.1   | 10.42 | 8.51  | 8.32 |
| 45 | 7.02 | 6.99 | 10.72 | 10.69 | 8.8   | 10.73 | 11.16 | 9.61  | 5.3  |
| 46 | 6.9  | 6.22 | 10.52 | 10.9  | 8.85  | 10.78 | 11.32 | 10.29 | 5.29 |
| 47 | 5.33 | 6    | 7.34  | 10.55 | 7.17  | 11    | 10.86 | 4.27  | 4.85 |
| 48 | 6.25 | 7.13 | 10.61 | 9.94  | 7.97  | 10.5  | 10.13 | 8.6   | 6.09 |
| 49 | 6.63 | 6.62 | 10.07 | 10.34 | 7.16  | 10.81 | 10.49 | 8.11  | 5.28 |
| 50 | 6.73 | 7.67 | 10.23 | 9.86  | 7.6   | 10.55 | 9.7   | 7.96  | 6.58 |
| 51 | 5.33 | 6.67 | 10.53 | 10.14 | 7.96  | 9.86  | 6.58  | 9.14  | 3.16 |
| 52 | 6.78 | 6.83 | 9.17  | 10.27 | 7.57  | 9.22  | 6.05  | 9.07  | 5.81 |
| 53 | 6.55 | 6.7  | 9.4   | 10.03 | 7.46  | 9.15  | 6.36  | 8.71  | 5.77 |

|      |      |       |       |      |       |       |      |      |
|------|------|-------|-------|------|-------|-------|------|------|
| 6    | 6.54 | 10.96 | 10.47 | 7.71 | 9.37  | 6.81  | 9.05 | 5.04 |
| 6.05 | 7.37 | 10.3  | 8.79  | 8.16 | 9.13  | 8.96  | 8.95 | 6.74 |
| 5.76 | 5.54 | 10.55 | 9.51  | 7.8  | 9.22  | 8.67  | 8.15 | 5.72 |
| 5.74 | 5.7  | 10.61 | 9.54  | 7.85 | 9.63  | 8.87  | 8    | 5.49 |
| 6.8  | 7.39 | 11.65 | 7.44  | 9.84 | 8.24  | 6.31  | 7.82 | 7.44 |
| 5.89 | 6.98 | 10.85 | 10.3  | 7.07 | 9.82  | 9.92  | 8.56 | 4.96 |
| 5    | 4.74 | 11.02 | 10.55 | 7.22 | 9.63  | 10.21 | 6.64 | 3.15 |
| 5.05 | 3.94 | 11.19 | 10.58 | 7.36 | 9.62  | 10.29 | 6.46 | 4.05 |
| 7.14 | 8.32 | 8.29  | 7.33  | 8.22 | 9.16  | 4.8   | 7.79 | 7.43 |
| 6.91 | 7.51 | 9.71  | 8.55  | 7.8  | 9.43  | 7.88  | 8.45 | 6.88 |
| 6.49 | 5.51 | 11.11 | 9.32  | 8.12 | 10.07 | 10.54 | 9.13 | 3.97 |
| 6.64 | 6.02 | 10.98 | 9.34  | 7.87 | 10.18 | 10.44 | 9.46 | 6.21 |
| 6.41 | 6.49 | 11.59 | 9.57  | 8.11 | 10.03 | 10.37 | 9.06 | 5.16 |
| 7.17 | 7.13 | 10.57 | 9.28  | 7.35 | 10.02 | 9.39  | 9.93 | 6.23 |
| 5.13 | 7.87 | 15.01 | 7.75  | 9.54 | 8.63  | 11.17 | 7.9  | 7.45 |
| 6.03 | 5.93 | 11.08 | 9.44  | 7.36 | 10    | 10.6  | 7.96 | 4.93 |
| 6.6  | 6.79 | 10.06 | 9.38  | 7.57 | 9.67  | 9.75  | 7.51 | 6.04 |
| 5.68 | 5.71 | 11.45 | 9.37  | 7.43 | 9.84  | 10.69 | 7.87 | 5.11 |

1  
2  
3  
4  
5  
6  
7  
8  
9  
10  
11  
12  
13  
14  
15  
16  
17  
18  
19  
20  
21  
22  
23  
24  
25  
26  
27  
28  
29  
30  
31  
32  
33  
34  
35  
36  
37  
38  
39  
40  
41  
42  
43  
44  
45  
46  
47  
48  
49  
50  
51  
52  
53  
54  
55  
56  
57  
58  
59  
60

| CDH2 | CDK14 | CDKN1A | CDKN2A | CDS1 | CEACAM1 | CEACAM5 | CEACAM6 | CEP170 |
|------|-------|--------|--------|------|---------|---------|---------|--------|
| 3.15 | 7.79  | 7.73   | 4.99   | 7.25 | 5.42    | 7.32    | 6.71    | 7.76   |
| 3.84 | 6.48  | 9.01   | 4.88   | 8.04 | 6.68    | 12.24   | 12.09   | 7.59   |
| 3.4  | 7.16  | 8.78   | 4.61   | 8.17 | 6.4     | 11.59   | 11.54   | 7.42   |
| 4.7  | 7     | 9.19   | 3.64   | 7.77 | 6.01    | 11.73   | 11.37   | 8.32   |
| 2.59 | 8.01  | 8.79   | 6.22   | 8.27 | 6.89    | 8.51    | 9.21    | 4.59   |
| 4.19 | 7.39  | 8.34   | 4.66   | 7.25 | 7.29    | 13.17   | 13.26   | 7.75   |
| 4.31 | 7.39  | 8.69   | 5.05   | 7.29 | 7.72    | 13.54   | 13.64   | 7.85   |
| 4.79 | 6.98  | 9.42   | 4.3    | 7.07 | 8.02    | 13.52   | 13.84   | 8.54   |
| 5.92 | 6.52  | 8.07   | 4.95   | 7.04 | 5.45    | 5.79    | 6.17    | 8.67   |
| 3.91 | 6.84  | 8.51   | 5.91   | 8.27 | 6.12    | 9.53    | 8.63    | 7.63   |
| 3.96 | 6.05  | 8.76   | 6.02   | 8.24 | 6.33    | 10.82   | 10.34   | 8.09   |
| 5.27 | 6.66  | 9.52   | 4.27   | 8.27 | 6.04    | 10.12   | 8.7     | 9.02   |
| 2.64 | 7.38  | 9.35   | 5.27   | 7.74 | 6.23    | 9.64    | 9.25    | 7.14   |
| 2.84 | 7.83  | 9.34   | 4.2    | 7.9  | 5.74    | 8.23    | 9.07    | 7.83   |
| 5.09 | 7.23  | 9.09   | 4.94   | 5.67 | 6.29    | 7.02    | 5.09    | 8.9    |
| 4.26 | 7.87  | 9.21   | 5.19   | 8.12 | 5.59    | 9.69    | 8.64    | 8.33   |
| 4.1  | 7.87  | 9.34   | 4.61   | 8.15 | 6.29    | 10.74   | 10.25   | 8.42   |
| 5.01 | 7.9   | 8.83   | 4.46   | 8    | 5.35    | 7.67    | 7.6     | 8.63   |
| 4.6  | 7.36  | 9.35   | 2.22   | 7.36 | 5.32    | 5.54    | 4.36    | 9.02   |
| 3.12 | 6.51  | 9.26   | 1.31   | 8.03 | 5.92    | 8.98    | 8.1     | 8.77   |
| 3.75 | 6.94  | 9.29   | 2.67   | 7.14 | 5.59    | 3.89    | 4.02    | 9.12   |
| 4.06 | 7.63  | 8.21   | 5.82   | 7.86 | 7.53    | 13.94   | 13.29   | 8.94   |
| 2.2  | 7.12  | 8.35   | 5.98   | 8.14 | 7.74    | 13.41   | 12.94   | 9.13   |
| 5.39 | 7.6   | 8.92   | 5.14   | 7.69 | 7.45    | 13.81   | 13.21   | 9.27   |
| 7.47 | 4.23  | 7.33   | 2.75   | 5.47 | 4.51    | 0.43    | 5.71    | 8.31   |
| 2.94 | 5.17  | 9.22   | 4.77   | 8.37 | 4.94    | 12.24   | 12.86   | 8.23   |
| 0.52 | 5.16  | 9.06   | 4.11   | 8.41 | 4.98    | 11.23   | 12.27   | 8.06   |
| 1.5  | 6.22  | 8.98   | 4.92   | 8.09 | 5.77    | 11.32   | 11.55   | 8.13   |
| 4.28 | 6.8   | 8.11   | 4.95   | 7.63 | 6.3     | 11.16   | 11.65   | 7.5    |
| 1.36 | 7.09  | 8.58   | 4.9    | 7.8  | 5.92    | 11.86   | 12.15   | 7.36   |
| 1.78 | 6.8   | 7.86   | 4.59   | 7.8  | 6.52    | 12.32   | 11.84   | 7.55   |
| 3.03 | 7.49  | 8.6    | 5.1    | 7.73 | 6.26    | 11.23   | 11.19   | 7.37   |
| 4.3  | 8     | 8.91   | 4.63   | 6.54 | 5.99    | 6.03    | 7.13    | 8.56   |
| 4.23 | 7.2   | 8.44   | 3.06   | 6.85 | 4.64    | 6.67    | 5.19    | 9.59   |
| 4.07 | 6.21  | 8.65   | 2.61   | 7.43 | 4.37    | 10.51   | 7.58    | 8.9    |
| 3.79 | 6.79  | 8.41   | 3.28   | 7.18 | 3.47    | 8.75    | 5.79    | 9.24   |
| 4.53 | 6.67  | 8.75   | 4.15   | 5.65 | 6.12    | 9.62    | 9.32    | 9.15   |
| 2.21 | 6.51  | 8.66   | 2.86   | 7.22 | 4.86    | 10.25   | 9.73    | 8.91   |
| 2.37 | 7     | 8.16   | 2.95   | 5.01 | 3.95    | 8.17    | 6.3     | 8.36   |
| 2.74 | 6.59  | 7.95   | 2.91   | 5.95 | 4.65    | 8.27    | 6.92    | 8.6    |
| 4.04 | 6.98  | 7.64   | 4.56   | 6.73 | 6.65    | 8.21    | 8.27    | 7.24   |
| 3.6  | 7.2   | 7.68   | 3.8    | 6.58 | 6.73    | 7.36    | 8.15    | 7.1    |
| 3.22 | 7.33  | 7.71   | 4.92   | 6.83 | 6.8     | 7.12    | 7.38    | 6.85   |
| 3.62 | 6.76  | 7.48   | 4.06   | 6.27 | 6.96    | 7.22    | 7.5     | 7.12   |
| 2.86 | 6.77  | 8.22   | 3.86   | 6.45 | 4.86    | 4.86    | 4.86    | 7.11   |
| 2.9  | 6.65  | 6.97   | 3.64   | 7.26 | 5.17    | 8.04    | 5.56    | 7.57   |
| 3.17 | 6.93  | 7.32   | 3.17   | 7.31 | 4.52    | 6.32    | 5.91    | 8      |
| 4.62 | 8.05  | 7.67   | 2.13   | 6.62 | 3.62    | 5.2     | 5.23    | 8.43   |
| 5.76 | 7.26  | 9.35   | 5.16   | 8.25 | 7.61    | 12.13   | 12.87   | 9.15   |
| 5.37 | 7.76  | 9      | 5.56   | 7.98 | 7.72    | 11.21   | 10.81   | 9.23   |
| 4.5  | 7.41  | 8.71   | 6.05   | 8.29 | 7.74    | 8.03    | 8.7     | 9.22   |

<https://mc.manuscriptcentral.com/gut>

1  
2  
3  
4  
5  
6  
7  
8  
9  
10  
11  
12  
13  
14  
15  
16  
17  
18  
19  
20  
21  
22  
23  
24  
25  
26  
27  
28  
29  
30  
31  
32  
33  
34  
35  
36  
37  
38  
39  
40  
41  
42  
43  
44  
45  
46  
47  
48  
49  
50  
51  
52  
53  
54  
55  
56  
57  
58  
59  
60

|      |      |       |      |      |      |       |       |      |
|------|------|-------|------|------|------|-------|-------|------|
| 6.06 | 8.01 | 8.93  | 5.36 | 7.77 | 7.5  | 10.13 | 10.34 | 9.43 |
| 4.2  | 6.84 | 9.98  | 5.03 | 7.79 | 7.34 | 11.25 | 9.99  | 7.06 |
| 2.19 | 7.32 | 10.43 | 4.83 | 8.53 | 6.98 | 9.16  | 9.24  | 7.15 |
| 2.28 | 6.71 | 10.16 | 4.91 | 8.57 | 7.47 | 11.44 | 10.63 | 7.43 |
| 3.14 | 6.94 | 10.22 | 5.22 | 8.17 | 7    | 8.34  | 8.44  | 7.49 |
| 5.18 | 7.25 | 8.07  | 5.75 | 7.37 | 4.55 | 11.24 | 8.44  | 9.03 |
| 1.83 | 5.77 | 8.44  | 5.67 | 8.41 | 6.33 | 13.11 | 11.07 | 8.95 |
| 3.32 | 4.49 | 7.48  | 5.45 | 8.78 | 5.25 | 12.9  | 11.01 | 8.83 |
| 4.76 | 6.5  | 7.81  | 5.3  | 8.2  | 6.22 | 13.93 | 11.99 | 9.25 |
| 3.58 | 6.28 | 7.77  | 4.39 | 6.64 | 4.87 | 3.39  | 4.34  | 8.11 |
| 3.13 | 6.5  | 8.1   | 4.24 | 7.36 | 4.86 | 10.54 | 8.36  | 8.11 |
| 3.82 | 6.01 | 7.69  | 4.14 | 6.97 | 4.46 | 8.02  | 6.1   | 8    |
| 3.3  | 6.8  | 8.14  | 4.44 | 6.53 | 4.3  | 7.36  | 5.76  | 7.99 |
| 5.15 | 7.15 | 9.96  | 5.15 | 6.15 | 6.15 | 7.74  | 11.96 | 6.15 |
| 2.79 | 7.21 | 9.79  | 5.04 | 7.25 | 6.62 | 7.7   | 10.31 | 8.04 |
| 3.08 | 7.48 | 9.04  | 5.21 | 7.82 | 6.41 | 7.89  | 9.18  | 8.02 |
| 1.24 | 8.86 | 10.04 | 6.95 | 8.65 | 7.62 | 8.12  | 10.51 | 6.2  |
| 2.36 | 8.68 | 9.65  | 6.94 | 8.51 | 7.2  | 7.58  | 9.91  | 5.9  |
| 1.72 | 6.5  | 9.45  | 5.18 | 8.57 | 7.54 | 10.89 | 11.18 | 8.11 |
| 2.26 | 6.64 | 9.83  | 4.69 | 8.83 | 8.25 | 11.72 | 12.39 | 7.56 |
| 3.13 | 7.08 | 9.52  | 4.43 | 8.53 | 7.68 | 10.77 | 11.46 | 7.93 |
| 3.1  | 9.16 | 9.64  | 5.05 | 8.01 | 5.98 | 14.04 | 13.43 | 8.24 |
| 4.45 | 9.82 | 9.09  | 5.23 | 8.01 | 7.28 | 13.79 | 12.99 | 7.83 |
| 4.75 | 9.27 | 8.37  | 5.63 | 7.82 | 6.14 | 13.12 | 11.8  | 7.82 |
| 6.31 | 7.32 | 9.19  | 4.34 | 8.97 | 7.08 | 11.39 | 9.88  | 8.77 |
| 6.23 | 7.61 | 9.37  | 4.13 | 9.02 | 8.06 | 10.72 | 11.21 | 9.01 |
| 7.05 | 7.48 | 9.17  | 4.28 | 8.95 | 8.09 | 10.39 | 10.93 | 9.3  |
| 3.68 | 7.44 | 8.58  | 5.91 | 7.25 | 5.94 | 13.53 | 11.87 | 7.96 |
| 3.15 | 7.48 | 8.49  | 5.65 | 6.69 | 5.37 | 13.83 | 12.38 | 8.08 |
| 3.96 | 7.58 | 8.49  | 5.61 | 7.1  | 5.93 | 13.41 | 11.82 | 8.02 |
| 4.7  | 7.66 | 11.05 | 5.03 | 8.5  | 7.63 | 12.15 | 12.44 | 7.59 |
| 3.01 | 7.26 | 10.38 | 4.72 | 8.63 | 7.81 | 13.41 | 12.82 | 7.58 |
| 2.31 | 7.55 | 10.56 | 4.58 | 8.64 | 8    | 13.24 | 12.67 | 7.05 |
| 1.73 | 8.13 | 9.68  | 3.9  | 7.72 | 6.65 | 11.16 | 10.45 | 8.88 |
| 2.69 | 7.7  | 9.39  | 3.46 | 7.7  | 6.8  | 11.72 | 11.15 | 8.61 |
| 4.57 | 7.86 | 9.82  | 3.62 | 7.63 | 6.83 | 12.81 | 10.86 | 9.18 |
| 5.34 | 8.07 | 8.8   | 4.52 | 7.76 | 7.41 | 11.08 | 10.87 | 8.19 |
| 5.34 | 8.07 | 8.8   | 4.52 | 7.76 | 7.41 | 11.08 | 10.87 | 8.19 |
| 3.47 | 7.76 | 8.69  | 4.32 | 8.39 | 8.93 | 13.09 | 12.7  | 7.2  |
| 3.88 | 7.87 | 9.17  | 4.98 | 8.14 | 8.7  | 12.72 | 12.23 | 7.81 |
| 4.44 | 8.43 | 8.82  | 4.15 | 8.03 | 8.71 | 12.96 | 12.43 | 8.08 |
| 4.73 | 7.96 | 8.5   | 5.26 | 7.64 | 6.17 | 8.57  | 8.18  | 7.36 |
| 6.32 | 7.52 | 8.61  | 5.2  | 7    | 5.97 | 10.39 | 8.93  | 7.98 |
| 8.09 | 7.07 | 9.03  | 5.76 | 7.61 | 6.08 | 10.97 | 9.92  | 7.9  |
| 6.66 | 7.92 | 8.62  | 5.37 | 7.52 | 6.28 | 10.01 | 9.47  | 7.24 |
| 2.73 | 7.1  | 9.17  | 0.73 | 8.15 | 4.59 | 8.45  | 10.66 | 8.21 |
| 2.88 | 5.12 | 9.78  | 3.4  | 8.4  | 5.5  | 11.02 | 11.95 | 7.53 |
| 2.84 | 6.86 | 9.66  | 2.52 | 7.77 | 4.6  | 8.95  | 10.51 | 8.29 |
| 4.55 | 7.82 | 8.22  | 5.4  | 7.55 | 5.65 | 10.17 | 7.77  | 7.74 |
| 3.02 | 7.93 | 8.64  | 4.87 | 7.28 | 5.85 | 10.8  | 10.69 | 7.95 |
| 3.04 | 8.03 | 8.27  | 5.36 | 7.34 | 5.59 | 10.98 | 10.86 | 7.96 |
| 3.86 | 7.42 | 8.56  | 3.72 | 7.64 | 7.37 | 10.07 | 10.17 | 7.95 |

<https://mc.manuscriptcentral.com/gut>

1  
2  
3  
4  
5  
6  
7  
8  
9  
10  
11  
12  
13  
14  
15  
16  
17  
18  
19  
20  
21  
22  
23  
24  
25  
26  
27  
28  
29  
30  
31  
32  
33  
34  
35  
36  
37  
38  
39  
40  
41  
42  
43  
44  
45  
46  
47  
48  
49  
50  
51  
52  
53  
54  
55  
56  
57  
58  
59  
60

|      |      |       |      |      |      |       |       |      |
|------|------|-------|------|------|------|-------|-------|------|
| 3.7  | 7.31 | 8.93  | 3.59 | 7.55 | 7.8  | 10.67 | 11.08 | 8    |
| 3.68 | 8.05 | 9.29  | 4.82 | 7.89 | 7.56 | 8.77  | 9.28  | 7.35 |
| 4.83 | 7.31 | 9.05  | 4.33 | 6.28 | 4.15 | 5.18  | 6.98  | 8.68 |
| 4.08 | 7.25 | 9.05  | 4.32 | 8.36 | 6.21 | 10.35 | 10.69 | 8.51 |
| 5.44 | 7.66 | 8.48  | 4.08 | 7.67 | 6.22 | 8.47  | 9.91  | 8.93 |
| 5.54 | 7.49 | 9.05  | 2.41 | 6.31 | 3.41 | 9.84  | 9.72  | 8.46 |
| 3.01 | 6.42 | 9.29  | 0    | 7.66 | 1.87 | 8.13  | 4.64  | 8.67 |
| 3.56 | 6.66 | 9.76  | 2.34 | 7.46 | 3.22 | 7.84  | 5.69  | 8.92 |
| 4.49 | 6.89 | 11.24 | 4.08 | 7.08 | 4.08 | 7.4   | 5.66  | 9.3  |
| 5.75 | 6.52 | 8.25  | 0.79 | 7.87 | 6.41 | 10.54 | 10.24 | 8.18 |
| 4.4  | 6.53 | 7.82  | 0.49 | 8.04 | 7.81 | 10.51 | 10.31 | 8.11 |
| 2.48 | 7.17 | 7.54  | 4.28 | 7.98 | 7.62 | 10.33 | 10.12 | 6.96 |
| 5.26 | 7.47 | 8.9   | 2.26 | 7.65 | 7.82 | 9.93  | 10.01 | 8.45 |
| 0    | 8.57 | 8.36  | 6.2  | 7.65 | 8.09 | 9.8   | 9.9   | 4.25 |
| 3.12 | 5.8  | 8.65  | 2.27 | 6.74 | 7.89 | 13.19 | 13.15 | 7.89 |
| 2.64 | 5.45 | 8.58  | 0    | 6.59 | 7.95 | 13.59 | 13.41 | 7.92 |
| 1.84 | 5.67 | 8.53  | 1.84 | 6.62 | 7.61 | 13.15 | 13.03 | 7.87 |
| 3.52 | 6.27 | 9.8   | 1.76 | 7.89 | 6.64 | 9.82  | 8.74  | 9    |
| 4.02 | 7.29 | 9.01  | 4.02 | 7.4  | 6.02 | 6.5   | 7.25  | 8.43 |
| 3.4  | 7.06 | 9.53  | 3.4  | 7.54 | 5.84 | 5.95  | 6.67  | 9.16 |
| 6.75 | 5.16 | 7.49  | 5.16 | 6.16 | 6.16 | 5.16  | 8.75  | 6.75 |
| 2.3  | 5.78 | 8.93  | 4.46 | 8.06 | 5.53 | 10.44 | 10.66 | 7.68 |
| 2.86 | 6.51 | 8.81  | 4.24 | 7.45 | 5.54 | 10.07 | 10.02 | 8.23 |
| 2.77 | 6.64 | 9.07  | 3.99 | 6.85 | 4.5  | 6.85  | 5.35  | 7.91 |
| 3.91 | 6.84 | 9.35  | 4.99 | 5.81 | 5.43 | 7.14  | 5.66  | 8.11 |
| 5.19 | 8.22 | 9.08  | 3.13 | 5.79 | 3.54 | 5.93  | 5.79  | 8.6  |
| 1    | 8.53 | 8.43  | 6.04 | 7.97 | 6.13 | 8.04  | 7.87  | 4.32 |
| 1.86 | 8.54 | 8.76  | 6.18 | 8.28 | 6.11 | 7.86  | 8.02  | 3.86 |
| 2.77 | 8.12 | 8.24  | 6.41 | 8.11 | 6.77 | 7.79  | 8.18  | 4.57 |
| 4.26 | 6.74 | 8.01  | 0.01 | 6.14 | 4.47 | 8.29  | 9.23  | 7.87 |
| 3.84 | 7.52 | 7.74  | 1.59 | 4.55 | 3.4  | 7.21  | 6.51  | 7.93 |
| 2.69 | 6.9  | 8.27  | 1.69 | 6.36 | 3.81 | 9.01  | 7.32  | 7.45 |
| 4.33 | 7.68 | 9.19  | 1.74 | 4.55 | 1.74 | 7.84  | 7.66  | 8.31 |
| 0.45 | 7.35 | 8.03  | 5.26 | 7.68 | 5.88 | 7.86  | 8.28  | 3.77 |
| 0.25 | 7.02 | 7.71  | 5.68 | 7.21 | 5.92 | 8.76  | 8.68  | 3.25 |
| 1.34 | 6.86 | 7.74  | 4.93 | 7.05 | 6    | 9.41  | 9.23  | 3.43 |
| 0    | 7.93 | 8.81  | 5.63 | 7.94 | 6.44 | 6.81  | 8.83  | 4.45 |
| 1.34 | 7.22 | 7.68  | 4.92 | 7.31 | 5.42 | 7.53  | 7.22  | 4.14 |
| 1.1  | 7.45 | 7.59  | 4.68 | 7.31 | 5.85 | 7.25  | 7.12  | 3.68 |
| 0.31 | 7.28 | 7.22  | 5.35 | 7.31 | 5.52 | 7.05  | 7.45  | 3.77 |
| 2.41 | 6.11 | 8     | 2.41 | 5.73 | 6.22 | 3.41  | 10.99 | 5.41 |
| 1.06 | 8.13 | 8.46  | 6.23 | 8.31 | 6.51 | 8.15  | 8.04  | 5.14 |
| 0.91 | 8.37 | 8.77  | 6.44 | 8.6  | 7.41 | 9.16  | 9.2   | 3.57 |
| 0.87 | 7.61 | 8.11  | 5.73 | 8.18 | 6.48 | 9.69  | 8.02  | 5.95 |
| 0    | 7.93 | 8.45  | 5.82 | 8.27 | 6.85 | 8.79  | 8.87  | 3.92 |
| 3.88 | 8.42 | 8.41  | 5.13 | 7.52 | 6.23 | 9.46  | 9.68  | 6.47 |
| 3.62 | 9.23 | 8.68  | 5.65 | 7.7  | 6.44 | 8.16  | 8.21  | 4.3  |
| 0.71 | 9.45 | 8.59  | 5.46 | 8.17 | 7.12 | 8.12  | 8.39  | 3.51 |
| 3.36 | 9.04 | 8.93  | 5.76 | 8.26 | 6.68 | 7.65  | 9.19  | 3.6  |
| 3.37 | 6.65 | 7.87  | 4.96 | 7.46 | 5.58 | 9.95  | 7.97  | 6.92 |
| 1.33 | 6.91 | 7.73  | 4.91 | 7.75 | 5.55 | 10.96 | 8.05  | 7.63 |
| 2.04 | 6.88 | 7.64  | 4.74 | 7.9  | 5.56 | 9.95  | 7.5   | 7.46 |

<https://mc.manuscriptcentral.com/gut>

1  
2  
3  
4  
5  
6  
7  
8  
9  
10  
11  
12  
13  
14  
15  
16  
17  
18  
19  
20  
21  
22  
23  
24  
25  
26  
27  
28  
29  
30  
31  
32  
33  
34  
35  
36  
37  
38  
39  
40  
41  
42  
43  
44  
45  
46  
47  
48  
49  
50  
51  
52  
53  
54  
55  
56  
57  
58  
59  
60

|      |      |       |      |      |      |       |       |      |
|------|------|-------|------|------|------|-------|-------|------|
| 3.08 | 7.18 | 7.93  | 5.36 | 7.68 | 4.97 | 9.07  | 7.36  | 7.29 |
| 5.69 | 8    | 8.91  | 6.93 | 7.63 | 6.04 | 11.92 | 9.44  | 8.5  |
| 3.46 | 7.72 | 9.42  | 6.57 | 8.35 | 6.19 | 12.15 | 10.25 | 8.28 |
| 3.74 | 7.13 | 8.3   | 7.37 | 7.52 | 5.65 | 11.53 | 8.41  | 7.65 |
| 3.34 | 7.38 | 8.49  | 7.24 | 7.82 | 5.46 | 11.75 | 8.32  | 7.72 |
| 4.52 | 8.15 | 9.42  | 5.81 | 7.52 | 6.19 | 9.96  | 10.78 | 8.61 |
| 4.3  | 6.82 | 10    | 5.6  | 8.22 | 6.23 | 10.63 | 9.54  | 8.77 |
| 3.3  | 6.39 | 9.97  | 5.5  | 7.95 | 6.17 | 11.65 | 10.45 | 8.82 |
| 5.2  | 7.48 | 9.28  | 3.06 | 6.62 | 5.44 | 8.74  | 6.65  | 9.07 |
| 6.09 | 7.12 | 10.67 | 4.09 | 9.13 | 6.72 | 11.41 | 12.51 | 8.97 |
| 3.49 | 7.58 | 9.55  | 3.87 | 8.54 | 5.87 | 10.65 | 9.71  | 8.94 |
| 3.84 | 7.79 | 10.01 | 3.97 | 8.6  | 6.19 | 11.54 | 10.62 | 9.24 |
| 4.39 | 7.14 | 9.65  | 3.39 | 8.99 | 6.09 | 11.7  | 10.35 | 8.74 |
| 4    | 7.14 | 8.5   | 5.48 | 7.9  | 5.92 | 8.14  | 10.23 | 7.86 |
| 3.09 | 6.28 | 9.16  | 5.39 | 8.19 | 6.58 | 9.42  | 9.51  | 8.26 |
| 4.15 | 7.45 | 9.26  | 5.1  | 7.16 | 5.95 | 6.12  | 6.93  | 8.15 |
| 4.08 | 7.57 | 8.44  | 1    | 5.45 | 5.95 | 10.02 | 7.59  | 9.1  |
| 3.47 | 6.8  | 8.47  | 1.67 | 7.6  | 6.34 | 11.58 | 11.84 | 8.35 |
| 4.43 | 7.6  | 8.9   | 2.52 | 6.61 | 6.27 | 10.95 | 11.43 | 8.99 |
| 4.97 | 6.48 | 7.96  | 1.51 | 7.88 | 5.6  | 10.78 | 10.86 | 8.15 |
| 5.1  | 7.33 | 9.46  | 3.13 | 7.31 | 6.36 | 12.46 | 11.27 | 8.2  |
| 3.48 | 5.31 | 10.37 | 0.48 | 7.91 | 7.05 | 11.75 | 10.27 | 7.75 |
| 4.91 | 7.94 | 9.42  | 4.28 | 7.58 | 6.23 | 8.06  | 8.8   | 7.82 |
| 3.51 | 7.37 | 9.5   | 4.1  | 7.23 | 6.36 | 7.91  | 9.25  | 7.85 |
| 5.47 | 8.1  | 10.98 | 5.15 | 7.74 | 5.96 | 6.96  | 8.67  | 8.58 |
| 4.27 | 5.57 | 7.7   | 3.36 | 5.32 | 3.36 | 10.16 | 6.19  | 7.95 |
| 2.38 | 6    | 7.82  | 2.79 | 5.84 | 4.49 | 11.49 | 7.56  | 7.42 |
| 2.09 | 5.6  | 7.27  | 3.57 | 6.63 | 4.29 | 12.04 | 6.56  | 6.99 |
| 4.22 | 6.6  | 8.71  | 2.9  | 6.54 | 1.9  | 11.8  | 5.07  | 7.15 |
| 1.76 | 7.18 | 7.37  | 5.46 | 7.15 | 5.85 | 7.18  | 6.97  | 1.76 |
| 0.72 | 6.72 | 7.06  | 5.18 | 6.95 | 5.42 | 7.69  | 7.47  | 4.63 |
| 0.88 | 6.88 | 7.39  | 4.34 | 7.22 | 5.41 | 7.21  | 7.05  | 2.47 |
| 0.96 | 6.86 | 7.33  | 4.96 | 6.71 | 5.42 | 7.09  | 6.91  | 3.76 |
| 3.06 | 6.36 | 7.29  | 2.53 | 6.78 | 4.82 | 5.84  | 6.27  | 6.29 |
| 1.66 | 6.46 | 7.07  | 3.98 | 6.98 | 4.79 | 6.26  | 6.25  | 6.36 |
| 0    | 6.77 | 7.18  | 3.47 | 6.55 | 5.05 | 6.05  | 6.07  | 6.48 |
| 3.07 | 7.02 | 8.22  | 3.92 | 6.59 | 4.72 | 5.99  | 5.95  | 6.96 |
| 4.68 | 8.05 | 8.74  | 1.35 | 1.35 | 3.35 | 1.35  | 2.68  | 9.25 |
| 3.05 | 6.63 | 8.99  | 3.46 | 7.55 | 7.02 | 14.58 | 12.58 | 7.99 |
| 2.74 | 6    | 9.11  | 1.42 | 8.69 | 6.46 | 10.94 | 8.56  | 8.17 |
| 4.55 | 7.32 | 9.14  | 2.23 | 8.54 | 6.4  | 6.55  | 4.82  | 8.12 |
| 4.47 | 6.91 | 8.8   | 5.55 | 8.07 | 4.68 | 9.36  | 8.12  | 7.83 |
| 6.51 | 8.1  | 9.8   | 4.51 | 8.1  | 4.51 | 8.32  | 5.51  | 7.1  |
| 2.87 | 6.8  | 8.66  | 4.04 | 7.9  | 5.33 | 10.27 | 9.27  | 8.25 |
| 4.26 | 7.5  | 9.63  | 0.94 | 8.05 | 5.33 | 9.82  | 9.75  | 8.37 |
| 0.68 | 5.81 | 8.91  | 5.14 | 8.06 | 7.11 | 12.14 | 11.57 | 6    |
| 4.84 | 6.84 | 8.62  | 5.31 | 7.28 | 6.68 | 11.66 | 11.64 | 7.6  |
| 7.34 | 6.74 | 8.29  | 5.4  | 7.33 | 7.15 | 13.19 | 12.6  | 7.59 |
| 5.58 | 7.02 | 8.43  | 5.26 | 7.2  | 6.32 | 11.39 | 11.49 | 7.45 |
| 4.43 | 6.53 | 8.07  | 4.7  | 6.95 | 4.66 | 11.89 | 11.45 | 8.49 |
| 3.11 | 6.7  | 7.56  | 3.53 | 7    | 4.78 | 10.53 | 9.59  | 7.72 |
| 2.64 | 6.68 | 7.81  | 4.36 | 6.97 | 5.12 | 10.2  | 8.94  | 7.61 |

<https://mc.manuscriptcentral.com/gut>



1  
2  
3  
4  
5  
6  
7  
8  
9  
10  
11  
12  
13  
14  
15  
16  
17  
18  
19  
20  
21  
22  
23  
24  
25  
26  
27  
28  
29  
30  
31  
32  
33  
34  
35  
36  
37  
38  
39  
40  
41  
42  
43  
44  
45  
46  
47  
48  
49  
50  
51  
52  
53  
54  
55  
56  
57  
58  
59  
60

|      |      |      |      |      |      |       |       |      |
|------|------|------|------|------|------|-------|-------|------|
| 4.37 | 6.11 | 7.76 | 3.96 | 7.04 | 5.18 | 10.93 | 8.75  | 8.06 |
| 4.1  | 6.19 | 8.64 | 6.27 | 5.68 | 6.1  | 12.84 | 10.55 | 7.91 |
| 2.17 | 5.87 | 7.59 | 5.72 | 6.2  | 5.29 | 13.95 | 13.09 | 7.19 |
| 2.07 | 5.7  | 7.7  | 5.91 | 6.29 | 6.07 | 14.11 | 13.3  | 7.45 |
| 3.14 | 7.31 | 8    | 6.36 | 7.39 | 5.25 | 9.16  | 8.2   | 4.36 |
| 4.32 | 5.79 | 8.23 | 0    | 7.29 | 6.18 | 10.74 | 6.01  | 7.76 |
| 0.65 | 4.15 | 6.89 | 0    | 7.04 | 5.77 | 11.36 | 9.77  | 6.8  |
| 0.94 | 3.88 | 6.96 | 1.67 | 6.88 | 5.58 | 11.49 | 10.15 | 6.7  |
| 0.27 | 7.89 | 7.86 | 5.52 | 7.72 | 5.59 | 7.72  | 7.49  | 3.59 |
| 1.28 | 7.16 | 8.06 | 5.32 | 7.32 | 5.45 | 10.12 | 8.45  | 6.74 |
| 5.21 | 7.64 | 7.98 | 2.46 | 7.31 | 5.21 | 8.49  | 9.51  | 8.64 |
| 3.47 | 7    | 7.7  | 3.47 | 7.58 | 5.35 | 9.03  | 10.41 | 7.82 |
| 4    | 7.11 | 7.69 | 1.3  | 7.5  | 5.35 | 7.98  | 7.94  | 8.04 |
| 4.59 | 7.57 | 7.65 | 3.71 | 6.63 | 4.52 | 6.57  | 7.82  | 8.49 |
| 5.54 | 5.13 | 9.72 | 3.54 | 7.4  | 2.54 | 3.54  | 6.94  | 7.07 |
| 4.44 | 6.39 | 7.54 | 5.09 | 7.46 | 5.44 | 8.12  | 9.59  | 7.47 |
| 2.4  | 6.62 | 7.51 | 4.09 | 7    | 5.04 | 6.55  | 7.82  | 6.98 |
| 4.84 | 6.09 | 7.6  | 5.18 | 7.37 | 5.73 | 7.99  | 9.41  | 7.43 |

1  
2  
3  
4  
5  
6  
7  
8  
9  
10  
11  
12  
13  
14  
15  
16  
17  
18  
19  
20  
21  
22  
23  
24  
25  
26  
27  
28  
29  
30  
31  
32  
33  
34  
35  
36  
37  
38  
39  
40  
41  
42  
43  
44  
45  
46  
47  
48  
49  
50  
51  
52  
53  
54  
55  
56  
57  
58  
59  
60

| CEP295 | CFP  | CGN   | CHAD | CHD4  | CHI3L1 | CHP1  | CHP2 | CHRD11 |
|--------|------|-------|------|-------|--------|-------|------|--------|
| 6.7    | 6.86 | 8.44  | 6.41 | 8.28  | 7.41   | 7.95  | 3.88 | 7.28   |
| 6.87   | 6.18 | 9.2   | 5.9  | 8.54  | 8.2    | 8.19  | 3.16 | 5.54   |
| 6.71   | 6.56 | 8.95  | 5.78 | 8.47  | 7.66   | 8.29  | 3.54 | 6.29   |
| 6.25   | 5.64 | 9.47  | 3.35 | 8.62  | 7.67   | 9.11  | 0.18 | 7.36   |
| 7.42   | 7.52 | 7.52  | 8.28 | 8.35  | 8.61   | 10.93 | 6.71 | 7.61   |
| 6.37   | 5.54 | 7.99  | 6.01 | 8.7   | 7.53   | 8.21  | 4.74 | 6.3    |
| 6.58   | 5.87 | 7.93  | 6.33 | 8.79  | 7.69   | 8.21  | 4.56 | 5.96   |
| 5.85   | 4.48 | 9.34  | 2.72 | 8.76  | 7.1    | 10.48 | 3.72 | 6.3    |
| 7.44   | 3.69 | 9.1   | 4.45 | 8.85  | 7.79   | 9.86  | 1.37 | 6.54   |
| 7.03   | 5.19 | 9.65  | 6    | 8.62  | 7.75   | 8.96  | 3.61 | 5.37   |
| 7.54   | 4.29 | 9.84  | 2.96 | 8.78  | 8.01   | 9.2   | 4.38 | 4.96   |
| 7.24   | 4.68 | 10.01 | 1.68 | 8.93  | 9.2    | 9.13  | 1.68 | 6.81   |
| 7.02   | 5.18 | 8.31  | 6.16 | 9.24  | 7.65   | 8.28  | 6.68 | 6.09   |
| 7.29   | 6.07 | 7.95  | 6.08 | 9.16  | 8.84   | 8.46  | 5.92 | 5.58   |
| 4.58   | 6.02 | 9.79  | 4.35 | 8.34  | 8.14   | 10.3  | 2.77 | 7.19   |
| 7.09   | 6.64 | 9.43  | 6.47 | 8.94  | 7.67   | 9     | 4.64 | 7.56   |
| 7.2    | 5.81 | 9.72  | 6.46 | 9     | 8.06   | 9.14  | 4.99 | 7.1    |
| 6.81   | 6.01 | 9.93  | 6.64 | 8.71  | 7.73   | 9.15  | 4.93 | 7.07   |
| 6.6    | 6.18 | 10.2  | 3.22 | 8.87  | 7.23   | 9.85  | 1.48 | 6.96   |
| 7.01   | 4.89 | 9.22  | 3.48 | 9.21  | 9.51   | 8.88  | 2.31 | 4.48   |
| 6.76   | 6.08 | 8.87  | 3.41 | 9.01  | 9.09   | 8.89  | 1.5  | 7.58   |
| 7.68   | 4.54 | 10.2  | 3.32 | 9.07  | 7.73   | 9.1   | 5.15 | 6.92   |
| 7.81   | 4.29 | 10.14 | 2.2  | 9.28  | 8.75   | 9     | 4.95 | 5.72   |
| 7.61   | 4.7  | 9.77  | 3.89 | 9.16  | 8.67   | 9.05  | 3.7  | 7.99   |
| 7.17   | 3.75 | 9.9   | 3.75 | 9.62  | 9.56   | 9.43  | 1.43 | 5.28   |
| 6.98   | 3.83 | 9.39  | 3.94 | 9.36  | 7.05   | 9.78  | 2.13 | 3.13   |
| 6.93   | 4.84 | 9.34  | 3.84 | 9.3   | 6.43   | 9.68  | 5.56 | 4.84   |
| 7.05   | 6.49 | 9.2   | 6.16 | 9.05  | 7.7    | 9.56  | 4.77 | 6.5    |
| 7.43   | 7.11 | 9.35  | 6.07 | 8.67  | 6.84   | 9.07  | 4.16 | 6.82   |
| 7.12   | 7.13 | 9.26  | 6.16 | 8.6   | 7.85   | 9.23  | 4.47 | 7.02   |
| 7.28   | 7.18 | 9.42  | 6.08 | 8.62  | 6.67   | 9.18  | 4.28 | 6.69   |
| 7.26   | 7.52 | 9.52  | 6.97 | 8.55  | 7.6    | 9.79  | 4.88 | 7.63   |
| 6.81   | 7.49 | 5.5   | 6.99 | 8.85  | 7.82   | 8.38  | 3.43 | 7.36   |
| 7.15   | 4.58 | 8.94  | 1.06 | 8.94  | 6.43   | 9.52  | 2.06 | 5.34   |
| 7.38   | 4.82 | 9.59  | 3.2  | 8.99  | 6.49   | 9.84  | 1.93 | 5.34   |
| 7.01   | 4.79 | 9.4   | 2.47 | 8.74  | 7.11   | 10.08 | 2.47 | 6.68   |
| 5.84   | 6.23 | 6.2   | 2.45 | 8.27  | 8.27   | 8.35  | 0.45 | 6      |
| 6.2    | 5.43 | 5.59  | 2.99 | 8.61  | 9.6    | 8.2   | 1.99 | 3.86   |
| 6.45   | 5.5  | 3.54  | 4.27 | 8.27  | 9.4    | 7.78  | 1.95 | 4.54   |
| 6.51   | 5.27 | 3.44  | 2.33 | 8.49  | 9.02   | 7.76  | 1.33 | 4.99   |
| 6.28   | 5.89 | 6.83  | 5.99 | 7.98  | 7.15   | 8.41  | 4.1  | 6.27   |
| 6.53   | 5.51 | 6.74  | 5.96 | 8     | 7.38   | 8.28  | 3.8  | 5.83   |
| 6.52   | 5.35 | 6.99  | 5.95 | 7.83  | 7.24   | 7.99  | 3.92 | 5.61   |
| 6.24   | 4.34 | 7.13  | 5.52 | 8.03  | 7.08   | 8.44  | 3.82 | 5.37   |
| 5.45   | 5.45 | 11.52 | 6.56 | 8.15  | 6.32   | 10.47 | 2.86 | 6.77   |
| 6.34   | 2.9  | 8.96  | 3.64 | 8.87  | 6.04   | 7.95  | 5.12 | 6.25   |
| 6.81   | 4    | 9.22  | 1    | 9.1   | 6.52   | 7.24  | 5.83 | 7.35   |
| 6.91   | 3.81 | 8.38  | 1.39 | 8.89  | 6.41   | 7.18  | 5.13 | 7.3    |
| 7.04   | 4.44 | 9.66  | 3.22 | 9.78  | 7.32   | 9.16  | 5.49 | 8.26   |
| 7.63   | 5.22 | 9.19  | 3.18 | 10.21 | 7.93   | 8.88  | 5.01 | 3.82   |
| 7.46   | 4.2  | 9.02  | 3.95 | 10.08 | 7.69   | 9.15  | 5.89 | 5.7    |

<https://mc.manuscriptcentral.com/gut>

|    |      |      |       |      |       |       |       |      |      |
|----|------|------|-------|------|-------|-------|-------|------|------|
| 1  |      |      |       |      |       |       |       |      |      |
| 2  | 7.27 | 4.99 | 8.85  | 2.89 | 10.13 | 8.42  | 8.51  | 4.89 | 6.44 |
| 3  | 7.43 | 5.91 | 9.7   | 6.59 | 9.41  | 7.31  | 8.75  | 4.03 | 6.39 |
| 4  | 7.07 | 5.92 | 9.78  | 6.51 | 9.76  | 8.14  | 8.73  | 3.89 | 5.89 |
| 5  | 7.35 | 5.88 | 9.65  | 6.58 | 9.71  | 7.71  | 8.78  | 4.12 | 5.65 |
| 6  | 7.3  | 6.32 | 9.52  | 6.6  | 9.61  | 7.43  | 8.49  | 3.77 | 6.96 |
| 7  | 7.52 | 6.21 | 9.22  | 4.87 | 9.32  | 6.34  | 9.38  | 0.23 | 6.69 |
| 8  | 7.53 | 3.25 | 10.03 | 3.57 | 9.43  | 7.05  | 10.09 | 1.25 | 4.77 |
| 9  | 8.05 | 3.46 | 10.1  | 2.46 | 9.47  | 6.18  | 10.35 | 2.32 | 3.09 |
| 10 | 7.8  | 4.69 | 10.19 | 3.25 | 9.51  | 6.25  | 10.33 | 2.02 | 6.83 |
| 11 | 8.52 | 3.28 | 9.32  | 1.17 | 10.2  | 7.11  | 8.14  | 2.17 | 5.6  |
| 12 | 8.15 | 4.54 | 9.05  | 3.71 | 10.03 | 7.8   | 9     | 1.54 | 4.93 |
| 13 | 8.22 | 4.21 | 9.02  | 1.82 | 10.41 | 7.07  | 8.52  | 1.4  | 4.27 |
| 14 | 8.06 | 4.15 | 8.85  | 2.79 | 10.11 | 6.53  | 8.39  | 2.3  | 5.84 |
| 15 | 7.47 | 6.15 | 8.74  | 7.15 | 8.74  | 10.36 | 15.76 | 5.15 | 8.74 |
| 16 | 6.04 | 5.37 | 8.34  | 7.31 | 9.08  | 9.02  | 11.09 | 4.96 | 7.26 |
| 17 | 6.82 | 5.82 | 7.83  | 6.9  | 9.4   | 9.04  | 9.57  | 5.6  | 6.51 |
| 18 | 6.49 | 7.32 | 8.24  | 9.31 | 9.1   | 9.67  | 10.78 | 6.77 | 8.95 |
| 19 | 6.33 | 7.58 | 8.3   | 9.01 | 8.86  | 9.54  | 11.6  | 6.53 | 8.55 |
| 20 | 7.2  | 5.75 | 8.73  | 6.07 | 9.39  | 6.87  | 9.08  | 3.6  | 5.18 |
| 21 | 7.31 | 5.65 | 9.21  | 6.18 | 9.44  | 6.78  | 8.96  | 4.26 | 4.58 |
| 22 | 7.29 | 6.08 | 8.87  | 6.26 | 8.94  | 7.24  | 9.21  | 4.72 | 5.96 |
| 23 | 7.69 | 4.34 | 9.46  | 2.8  | 9.69  | 6.68  | 9.45  | 7.77 | 7.35 |
| 24 | 7.75 | 5.09 | 9.24  | 4.74 | 9.53  | 6.6   | 9.9   | 7.59 | 7.46 |
| 25 | 7.76 | 5.86 | 8.75  | 6.48 | 9.32  | 7.51  | 8.66  | 7.3  | 8.03 |
| 26 | 7.71 | 5.03 | 9.83  | 5.49 | 9.69  | 9.94  | 10.07 | 2.96 | 4.1  |
| 27 | 7.92 | 5.09 | 9.72  | 4.56 | 9.74  | 10.69 | 9.92  | 3.36 | 4.04 |
| 28 | 8.03 | 4.15 | 9.79  | 3.5  | 9.73  | 11.53 | 9.9   | 2.69 | 5.73 |
| 29 | 7.7  | 6.45 | 8.13  | 6.19 | 9.35  | 9.05  | 7.99  | 4.06 | 6.09 |
| 30 | 7.75 | 6.21 | 7.82  | 6.26 | 9.18  | 8.88  | 7.65  | 3.3  | 5.84 |
| 31 | 7.77 | 6.55 | 7.99  | 6.13 | 9.22  | 9.41  | 7.61  | 3.96 | 6.8  |
| 32 | 7.6  | 6.53 | 9.29  | 6.7  | 9.57  | 7.81  | 8.7   | 5.7  | 8.32 |
| 33 | 7.6  | 6.52 | 9.68  | 6.08 | 9.55  | 8.04  | 9.15  | 5.72 | 7.01 |
| 34 | 7.45 | 6.99 | 9.89  | 6.4  | 9.3   | 7.94  | 9.58  | 6.2  | 6.48 |
| 35 | 7.22 | 6.48 | 8.55  | 6.03 | 9.05  | 7.59  | 8.38  | 4.77 | 6.61 |
| 36 | 7.18 | 6.9  | 8.78  | 6.7  | 8.98  | 8.27  | 8.73  | 4.69 | 6.61 |
| 37 | 7.02 | 6.61 | 8.46  | 6.66 | 9     | 9.25  | 8.35  | 4.45 | 6.96 |
| 38 | 7.11 | 6.61 | 8.04  | 6.9  | 8.46  | 7.97  | 8.45  | 5.14 | 7.43 |
| 39 | 7.11 | 6.61 | 8.04  | 6.9  | 8.46  | 7.97  | 8.45  | 5.14 | 7.43 |
| 40 | 6.69 | 5.64 | 9.33  | 6.99 | 8.56  | 7.76  | 9.09  | 5.85 | 6.78 |
| 41 | 7.32 | 6.15 | 9.04  | 7.21 | 8.67  | 7.86  | 8.96  | 5.79 | 7.35 |
| 42 | 6.98 | 5.79 | 8.85  | 6.93 | 8.56  | 7.93  | 8.66  | 5.66 | 7.4  |
| 43 | 7.58 | 7.18 | 7.61  | 7.09 | 8.74  | 7.95  | 8.34  | 5.41 | 7.17 |
| 44 | 7.19 | 6.97 | 9.05  | 6.77 | 8.87  | 9.1   | 9.37  | 4.94 | 7.05 |
| 45 | 7.04 | 6.79 | 9.5   | 6.18 | 8.74  | 8.37  | 9.75  | 5.44 | 6.34 |
| 46 | 7.44 | 6.86 | 8.75  | 7.07 | 8.58  | 7.86  | 9.76  | 5.31 | 7.37 |
| 47 | 7.07 | 4.25 | 9.24  | 3.05 | 9.57  | 8.56  | 9.58  | 7.8  | 4.94 |
| 48 | 6.93 | 4.47 | 9.55  | 2.08 | 9.6   | 7.46  | 9.58  | 7.86 | 4.88 |
| 49 | 6.49 | 6.4  | 9.75  | 3.32 | 9.13  | 9.49  | 10.63 | 7.46 | 4.77 |
| 50 | 7.18 | 7.46 | 7.44  | 7.01 | 8.68  | 7.4   | 8.01  | 5.55 | 8.15 |
| 51 | 7.23 | 7.51 | 7.77  | 6.61 | 8.66  | 8.73  | 8.7   | 4.72 | 8    |
| 52 | 7.54 | 7.14 | 7.69  | 6.46 | 8.79  | 7.41  | 8.59  | 5.46 | 7.58 |
| 53 | 7.15 | 6.9  | 9.02  | 6.07 | 8.43  | 7.6   | 8.27  | 5.68 | 6.37 |

|    |      |      |       |      |      |      |       |      |      |
|----|------|------|-------|------|------|------|-------|------|------|
| 1  |      |      |       |      |      |      |       |      |      |
| 2  | 7.08 | 6.73 | 8.9   | 6.15 | 8.67 | 8.12 | 8.14  | 5.21 | 5.95 |
| 3  | 6.59 | 7.32 | 9.04  | 7.44 | 8.14 | 7.92 | 9.57  | 5.59 | 7.89 |
| 4  | 7.2  | 6.27 | 7.95  | 5.92 | 8.98 | 6.88 | 8.46  | 3.57 | 8.05 |
| 5  | 6.69 | 5.8  | 8.78  | 5.4  | 9.16 | 8.41 | 9.23  | 3.08 | 7.32 |
| 6  | 6.95 | 4.95 | 8.68  | 5.7  | 9.05 | 7.88 | 8.92  | 2.49 | 9.06 |
| 7  | 5.9  | 5.76 | 9.01  | 1.99 | 8.57 | 6.62 | 9.26  | 0.41 | 7.59 |
| 8  | 6.8  | 4.41 | 9.07  | 2.72 | 8.85 | 6.74 | 8.65  | 1.87 | 4.01 |
| 9  | 7    | 4.46 | 9.17  | 3.22 | 8.87 | 6.44 | 8.68  | 0    | 5.34 |
| 10 | 5.49 | 6.2  | 10.53 | 4.49 | 7.92 | 7.08 | 13.02 | 3.49 | 6.66 |
| 11 | 6.88 | 6.04 | 10.22 | 1.79 | 8.51 | 7.24 | 9.58  | 6.92 | 5.84 |
| 12 | 6.95 | 4.74 | 9.87  | 3.3  | 8.7  | 6.16 | 8.68  | 6.16 | 5.44 |
| 13 | 7.39 | 6.49 | 9.19  | 6.06 | 8.59 | 6.85 | 8.03  | 6.04 | 6.35 |
| 14 | 5.58 | 5.43 | 11.04 | 2.26 | 7.65 | 5.07 | 12.6  | 5.26 | 6.43 |
| 15 | 7.65 | 7.95 | 8.02  | 8.74 | 9.38 | 9.65 | 10.41 | 6.02 | 7.78 |
| 16 | 7.07 | 4.12 | 8.99  | 4.03 | 9.34 | 7.69 | 8.77  | 0    | 3.41 |
| 17 | 7.19 | 2.83 | 8.98  | 2.16 | 9.36 | 8.26 | 8.48  | 0    | 2.42 |
| 18 | 6.65 | 3.52 | 9.16  | 3.84 | 9.29 | 7.87 | 8.65  | 1.52 | 4.1  |
| 19 | 6.97 | 3.68 | 8.91  | 3.6  | 8.77 | 9.44 | 8.22  | 4.79 | 3.24 |
| 20 | 6.38 | 5.32 | 7.84  | 6.48 | 8.33 | 8.89 | 8.38  | 4.13 | 5.75 |
| 21 | 6.71 | 4.82 | 7.92  | 5.85 | 8.51 | 9.94 | 8.27  | 2.85 | 5.77 |
| 22 | 6.16 | 7.16 | 11.47 | 6.75 | 7.49 | 8.49 | 16.96 | 5.16 | 7.49 |
| 23 | 6.85 | 4.34 | 9.62  | 2.83 | 8.72 | 7.47 | 8.45  | 3.94 | 2.59 |
| 24 | 6.12 | 5.18 | 9.42  | 4.71 | 8.72 | 7.95 | 8.88  | 3.99 | 4.71 |
| 25 | 5.77 | 3.99 | 10.46 | 1.18 | 8.21 | 5.88 | 9.96  | 6.77 | 6.31 |
| 26 | 5.23 | 4.49 | 10.33 | 3.91 | 8.17 | 5.86 | 11.11 | 5.55 | 6.61 |
| 27 | 6.3  | 5.07 | 9.42  | 2.54 | 8.59 | 8.32 | 9.28  | 4.45 | 6.71 |
| 28 | 7.41 | 8.25 | 7.54  | 7.75 | 8.2  | 8.72 | 9.02  | 5.7  | 7.79 |
| 29 | 7.41 | 8.46 | 7.12  | 8.25 | 8.63 | 8.7  | 8.86  | 5.67 | 8.19 |
| 30 | 7.23 | 8.03 | 6.77  | 7.72 | 8.52 | 8.31 | 8.07  | 5.57 | 7.7  |
| 31 | 5.79 | 4.1  | 8.04  | 1.01 | 7.92 | 4.53 | 7.52  | 2.33 | 7.65 |
| 32 | 5.8  | 3.84 | 6.99  | 1.91 | 7.99 | 6.78 | 7.86  | 0    | 7.4  |
| 33 | 5.39 | 3.43 | 8.17  | 2.43 | 7.92 | 5.11 | 9.23  | 0.11 | 6.82 |
| 34 | 5.8  | 3.33 | 6.68  | 2.48 | 8.19 | 5.33 | 7.57  | 0.16 | 8.6  |
| 35 | 5.97 | 6.75 | 6.36  | 7.5  | 7.5  | 7.44 | 8.92  | 5.15 | 6.38 |
| 36 | 6.66 | 6.57 | 6.71  | 6.79 | 7.41 | 7.24 | 7.69  | 4.84 | 5.64 |
| 37 | 5.87 | 6.75 | 6.76  | 6.67 | 7.06 | 7.1  | 7.84  | 4.7  | 5.41 |
| 38 | 5.41 | 7.15 | 6.55  | 7.79 | 7.99 | 7.97 | 8.18  | 5.98 | 7.09 |
| 39 | 6.62 | 6.66 | 6.14  | 7.04 | 7.4  | 7.38 | 8.01  | 5.14 | 6.62 |
| 40 | 6.65 | 6.83 | 6.23  | 7.07 | 7.64 | 6.96 | 7.71  | 5    | 5.49 |
| 41 | 7.04 | 6.29 | 6.44  | 7.29 | 7.43 | 7.46 | 7.91  | 4.95 | 6.31 |
| 42 | 4.41 | 5    | 5.58  | 7.77 | 8.03 | 7.73 | 8.54  | 5.73 | 8.87 |
| 43 | 7.53 | 6.94 | 7.3   | 7.73 | 8.32 | 8.31 | 9.26  | 5.86 | 7.26 |
| 44 | 7.85 | 7.68 | 7.27  | 8.27 | 8.72 | 8.8  | 8.94  | 6.12 | 7.4  |
| 45 | 7    | 6.42 | 8.11  | 7.08 | 8.02 | 7.66 | 10.02 | 4.95 | 6.26 |
| 46 | 7.25 | 6.9  | 7.59  | 7.77 | 8.25 | 8.21 | 9.68  | 5.5  | 7.05 |
| 47 | 6.89 | 6.71 | 7.44  | 7.22 | 8.23 | 8.03 | 9.2   | 5.18 | 7.1  |
| 48 | 7.66 | 7.31 | 7.68  | 7.8  | 8.5  | 8.69 | 9.79  | 5.69 | 7.12 |
| 49 | 8.14 | 7.35 | 7.5   | 7.89 | 8.51 | 8.72 | 7.77  | 6.03 | 7.03 |
| 50 | 7.02 | 6.9  | 7.55  | 8.13 | 8.59 | 8.7  | 9.57  | 6.85 | 7.45 |
| 51 | 7.22 | 4.77 | 7.65  | 6.18 | 8.7  | 6.61 | 6.98  | 6.34 | 6.98 |
| 52 | 7.42 | 4.87 | 8.17  | 5.2  | 8.6  | 7.35 | 7.21  | 4.55 | 5.63 |
| 53 | 7.04 | 5.76 | 7.92  | 6.51 | 8.56 | 7.75 | 7.78  | 4.04 | 6.23 |
| 54 |      |      |       |      |      |      |       |      |      |
| 55 |      |      |       |      |      |      |       |      |      |
| 56 |      |      |       |      |      |      |       |      |      |
| 57 |      |      |       |      |      |      |       |      |      |
| 58 |      |      |       |      |      |      |       |      |      |
| 59 |      |      |       |      |      |      |       |      |      |
| 60 |      |      |       |      |      |      |       |      |      |

<https://mc.manuscriptcentral.com/gut>

|    |      |      |       |      |      |      |       |      |      |
|----|------|------|-------|------|------|------|-------|------|------|
| 1  |      |      |       |      |      |      |       |      |      |
| 2  | 7.34 | 6.13 | 8.41  | 6.44 | 8.48 | 7.75 | 7.56  | 5.59 | 6.42 |
| 3  | 6.91 | 5.8  | 9.62  | 6.62 | 9.27 | 7.89 | 10.11 | 3.69 | 8.17 |
| 4  | 6.9  | 6.09 | 9.53  | 6.75 | 9.35 | 9.05 | 10.32 | 3.9  | 6.19 |
| 5  | 6.93 | 6.06 | 9.86  | 6.99 | 9.2  | 7.75 | 10.15 | 3.06 | 5.44 |
| 6  | 7    | 5.71 | 9.93  | 7.03 | 9.2  | 7.78 | 10.14 | 3.91 | 5.41 |
| 7  | 7.92 | 7.09 | 9.73  | 7.03 | 9.32 | 8.28 | 8.55  | 4.52 | 8.04 |
| 8  | 7.41 | 5.65 | 11.18 | 5.01 | 9.04 | 8.51 | 9.89  | 5.01 | 7.72 |
| 9  | 7.89 | 5.65 | 10.79 | 4.3  | 9.39 | 8.62 | 9.1   | 2.79 | 7.06 |
| 10 | 6.6  | 6.3  | 10.53 | 4.65 | 9.11 | 7.33 | 9.85  | 3.33 | 9.27 |
| 11 | 7.33 | 5.41 | 10.14 | 5.22 | 9.52 | 6.83 | 10    | 5.35 | 5.93 |
| 12 | 7.52 | 5.95 | 9.54  | 6.07 | 9.78 | 8.62 | 9.4   | 4.75 | 7.39 |
| 13 | 7.29 | 5.34 | 9.9   | 6.03 | 9.8  | 9.1  | 9.4   | 5.29 | 6.86 |
| 14 | 7.41 | 4.65 | 9.94  | 5.35 | 9.58 | 7.4  | 9.55  | 5.62 | 6.78 |
| 15 | 6.86 | 5.34 | 9.3   | 5.94 | 8.82 | 6.68 | 8.59  | 6.42 | 7.1  |
| 16 | 6.76 | 3.83 | 9.93  | 2.83 | 9.25 | 8.09 | 9.16  | 6.82 | 5.12 |
| 17 | 6.19 | 5.43 | 9     | 5.47 | 8.77 | 6.87 | 10.07 | 5.19 | 8.33 |
| 18 | 6.68 | 6.72 | 7.5   | 1.58 | 9.11 | 6.65 | 8.36  | 2    | 7.91 |
| 19 | 7.13 | 4.47 | 8.67  | 2.99 | 9.26 | 7.44 | 9.73  | 4.99 | 5.75 |
| 20 | 6.71 | 4.98 | 8.02  | 2.1  | 9.06 | 6.69 | 9.13  | 0.52 | 6.82 |
| 21 | 7    | 4.51 | 9.04  | 2.25 | 9.02 | 7.2  | 8.73  | 0    | 8.36 |
| 22 | 6.88 | 3.45 | 8.24  | 3.71 | 9.45 | 9.14 | 8.73  | 3.79 | 2.54 |
| 23 | 6.99 | 1.8  | 9.07  | 2.48 | 9.49 | 6.92 | 8.83  | 3.06 | 2.06 |
| 24 | 6.32 | 5.5  | 8.69  | 5.81 | 8.52 | 8.61 | 8.69  | 4.28 | 6.89 |
| 25 | 6.48 | 5.45 | 9     | 5.93 | 8.92 | 8.45 | 8.54  | 3.51 | 5.84 |
| 26 | 5.15 | 5.96 | 10.64 | 5.15 | 7.91 | 7.06 | 12.1  | 4.15 | 9.38 |
| 27 | 5.98 | 5.22 | 8.08  | 0.36 | 8.16 | 7.67 | 7.28  | 2.95 | 6.22 |
| 28 | 5.55 | 4.7  | 8.11  | 5.55 | 8.06 | 7.53 | 8.31  | 4.11 | 5.31 |
| 29 | 7.01 | 3.09 | 8.86  | 4.52 | 8.39 | 7.17 | 8.05  | 3.76 | 3.57 |
| 30 | 6.65 | 3.48 | 7.54  | 1.9  | 9    | 7.22 | 8.6   | 3.9  | 5.07 |
| 31 | 7.28 | 7.01 | 5.57  | 6.22 | 7.99 | 7.4  | 7.62  | 5.08 | 6.85 |
| 32 | 6.91 | 6.91 | 6.95  | 6.24 | 7.77 | 7.47 | 8.6   | 5.24 | 6.76 |
| 33 | 7.03 | 7.07 | 6.21  | 6.99 | 7.73 | 7.11 | 7.59  | 4.79 | 6.93 |
| 34 | 6.63 | 7.13 | 6.54  | 6.93 | 7.46 | 7.72 | 7.8   | 5.35 | 7.07 |
| 35 | 6.06 | 5.65 | 7.64  | 5.31 | 7.69 | 7.07 | 8.55  | 2.82 | 5.82 |
| 36 | 5.79 | 6.39 | 7.61  | 5.96 | 7.44 | 7.57 | 8.36  | 4.18 | 6.17 |
| 37 | 6.23 | 6.4  | 7.34  | 5.94 | 7.54 | 7.79 | 7.77  | 4.16 | 6.48 |
| 38 | 5.91 | 6.29 | 7.52  | 5.71 | 7.6  | 8.74 | 7.61  | 2.97 | 6.24 |
| 39 | 7.15 | 7.31 | 1.35  | 2.68 | 9.63 | 7.85 | 7.25  | 0.35 | 6.66 |
| 40 | 6.99 | 5.71 | 10.87 | 5.55 | 9.11 | 8.23 | 10.08 | 7.08 | 5.37 |
| 41 | 7.12 | 5.42 | 9.35  | 3.74 | 8.64 | 6.7  | 9.99  | 1.42 | 3.23 |
| 42 | 5.69 | 6.63 | 10.52 | 3.23 | 7.48 | 7.32 | 13.36 | 2.23 | 6.23 |
| 43 | 7.13 | 5.43 | 11.29 | 6.14 | 8.79 | 7.4  | 9.24  | 4.45 | 6.8  |
| 44 | 5.51 | 6.1  | 9.94  | 4.51 | 7.51 | 6.83 | 13.53 | 4.51 | 7.32 |
| 45 | 7.13 | 4.51 | 10.04 | 2.19 | 9.15 | 9.81 | 9.2   | 2.87 | 5.6  |
| 46 | 6.96 | 4.1  | 10.2  | 0    | 9.14 | 7.52 | 9.32  | 2.52 | 5.69 |
| 47 | 7.78 | 3.49 | 10.89 | 5.73 | 9.69 | 5.07 | 8.07  | 6.24 | 1.68 |
| 48 | 7.3  | 5.51 | 10.05 | 6.05 | 9.31 | 8.68 | 8.55  | 6.07 | 6.67 |
| 49 | 7.16 | 4.45 | 10.01 | 5.03 | 9.16 | 7.63 | 8.31  | 6.06 | 6.98 |
| 50 | 7.35 | 5.84 | 9.37  | 6.28 | 9.1  | 8.48 | 8.28  | 5.26 | 7.35 |
| 51 | 6.59 | 3.48 | 7.4   | 1.16 | 7.96 | 5.03 | 8.02  | 0.57 | 6.56 |
| 52 | 6.51 | 4.78 | 6.64  | 4.7  | 7.85 | 7.66 | 7.55  | 2.11 | 6.81 |
| 53 | 6.31 | 4.96 | 6.79  | 5.54 | 7.55 | 7.43 | 7.68  | 1.83 | 7.05 |

<https://mc.manuscriptcentral.com/gut>

|      |      |       |      |      |      |       |      |      |
|------|------|-------|------|------|------|-------|------|------|
| 6.22 | 4.49 | 7.6   | 2.37 | 7.89 | 5.49 | 8.56  | 1.79 | 7.08 |
| 6.27 | 4.91 | 7.85  | 4.8  | 7.59 | 5.62 | 9.18  | 3.68 | 7.58 |
| 6.72 | 5.39 | 7.55  | 4.39 | 8.15 | 8.01 | 8.46  | 2.91 | 4.39 |
| 7.04 | 5.07 | 7.72  | 3.81 | 7.97 | 6.22 | 8.14  | 3.07 | 4.19 |
| 6.31 | 7.05 | 7.17  | 6.95 | 7.78 | 8.14 | 10.12 | 2.55 | 6.88 |
| 6.48 | 3.65 | 6.13  | 2.37 | 8.27 | 7.5  | 7.45  | 3.73 | 6.75 |
| 6.35 | 3.07 | 6.6   | 1.65 | 8.22 | 6.57 | 7.78  | 3.82 | 4.02 |
| 6.3  | 2.67 | 6.64  | 1.67 | 8.28 | 6.24 | 7.78  | 2.67 | 3.88 |
| 6.9  | 6.73 | 6.25  | 7.21 | 7.79 | 8.03 | 8.58  | 5.23 | 6.48 |
| 6.66 | 6.19 | 7.81  | 6.45 | 8.01 | 7.72 | 8.28  | 4.42 | 6.37 |
| 6.41 | 4.41 | 8.08  | 2.46 | 8.47 | 4.05 | 8.5   | 1.97 | 8.56 |
| 6.56 | 4.98 | 7.66  | 5.59 | 8.49 | 7.1  | 8.34  | 3.47 | 7.32 |
| 5.92 | 3.89 | 8.21  | 4.95 | 8.26 | 5.47 | 9.02  | 4.11 | 8.21 |
| 6.35 | 4.52 | 6.73  | 5.41 | 8.31 | 5.62 | 8.13  | 3.13 | 9.27 |
| 2.54 | 4.54 | 10.84 | 4.87 | 7.07 | 6    | 13.83 | 3.54 | 6.87 |
| 6.1  | 4.61 | 9.68  | 4.26 | 8.77 | 9.66 | 8.26  | 1.39 | 5.99 |
| 5.98 | 5.56 | 8.09  | 5.68 | 8.56 | 8.68 | 7.78  | 4.28 | 6.23 |
| 5.66 | 4.84 | 10.15 | 4.45 | 8.77 | 9.92 | 8.56  | 0.75 | 6    |

1  
2  
3  
4  
5  
6  
7  
8  
9  
10  
11  
12  
13  
14  
15  
16  
17  
18  
19  
20  
21  
22  
23  
24  
25  
26  
27  
28  
29  
30  
31  
32  
33  
34  
35  
36  
37  
38  
39  
40  
41  
42  
43  
44  
45  
46  
47  
48  
49  
50  
51  
52  
53  
54  
55  
56  
57  
58  
59  
60

| CHRNA7 | CIB1  | CKMT1A | CLDN1 | CLDN3 | CLDN4 | CLDN7 | CLEC2B | CLEC3B |
|--------|-------|--------|-------|-------|-------|-------|--------|--------|
| 7.28   | 9.2   | 8.43   | 9.71  | 6.92  | 9.03  | 8.5   | 8.71   | 7.05   |
| 6.55   | 10.31 | 8.13   | 8.13  | 8.51  | 11.34 | 10.07 | 8.56   | 6.63   |
| 6.19   | 9.91  | 8.04   | 8.56  | 7.96  | 10.88 | 9.83  | 8.76   | 7.16   |
| 5.61   | 10.25 | 7.67   | 9.14  | 8.36  | 11.54 | 10.32 | 9.52   | 8.04   |
| 8.79   | 8.71  | 10.01  | 4.01  | 7.87  | 8.82  | 7.92  | 8.29   | 7.55   |
| 7.24   | 10.26 | 8.12   | 8.54  | 7.88  | 9.87  | 8.61  | 8.78   | 6.27   |
| 7.1    | 10.32 | 8.25   | 8.36  | 7.98  | 10.12 | 8.51  | 8.89   | 5.8    |
| 7.29   | 10.94 | 8.18   | 9.89  | 8.8   | 11.72 | 10.15 | 10.22  | 5.39   |
| 6.89   | 10.33 | 9.24   | 7.39  | 5.17  | 6.6   | 9.7   | 9.75   | 5.01   |
| 6.37   | 9.95  | 8.76   | 7.64  | 6.94  | 9.94  | 9.81  | 8.06   | 5.77   |
| 6.67   | 10.65 | 8.43   | 8.18  | 7.33  | 10.31 | 10.37 | 8.59   | 5.59   |
| 5.93   | 10.51 | 8.23   | 8.1   | 6.17  | 10.27 | 10.11 | 9.23   | 6.21   |
| 6.53   | 9.63  | 8.71   | 6.41  | 10.07 | 11.3  | 10.37 | 7.97   | 6.41   |
| 6.93   | 9.75  | 8.77   | 6.92  | 10.11 | 11.37 | 10.03 | 8.76   | 6.78   |
| 5.58   | 10.2  | 7.98   | 9.17  | 9.35  | 12.47 | 10.21 | 10.77  | 7.63   |
| 7.26   | 10.66 | 8.76   | 6.11  | 9.06  | 11.26 | 9.2   | 9.18   | 7.15   |
| 7.76   | 10.86 | 8.91   | 7.61  | 9.91  | 11.99 | 9.9   | 9      | 7.15   |
| 7.98   | 10.57 | 9.45   | 7.94  | 9.35  | 11.64 | 9.27  | 9.43   | 7.57   |
| 4.8    | 10.77 | 7.5    | 9.59  | 2.22  | 10.38 | 9.82  | 10.95  | 7.72   |
| 5.85   | 10.67 | 7.81   | 8.59  | 3.56  | 10.3  | 9.48  | 9.78   | 6.58   |
| 4.75   | 10.61 | 6.67   | 8.82  | 3.5   | 9.7   | 9.21  | 10.42  | 6.24   |
| 8.03   | 10.3  | 8.9    | 10.1  | 9.53  | 11.46 | 10.87 | 8.77   | 6.66   |
| 8.02   | 10.15 | 8.86   | 10.34 | 9.56  | 11.74 | 10.93 | 8.66   | 6.47   |
| 8.16   | 10.22 | 8.61   | 9.8   | 8.67  | 10.99 | 10.42 | 8.5    | 6.52   |
| 6.31   | 9.24  | 5.67   | 5.07  | 8.97  | 8.62  | 9.38  | 8.39   | 5.01   |
| 7.41   | 11.03 | 8.98   | 8.59  | 8.33  | 10.43 | 10.26 | 7.49   | 5.08   |
| 7.67   | 10.9  | 9.3    | 8.74  | 8.79  | 10.54 | 10.49 | 7.59   | 6.35   |
| 7.75   | 10.52 | 9.33   | 7.22  | 8.62  | 10.83 | 10.06 | 7.86   | 7.21   |
| 6.52   | 9.93  | 8.65   | 7.6   | 7.94  | 10.24 | 10.02 | 7.66   | 6.7    |
| 7      | 9.99  | 8.83   | 7.7   | 7.61  | 10.41 | 9.91  | 8.52   | 6.84   |
| 6.42   | 10.13 | 8.59   | 8.59  | 7.99  | 10.28 | 10.03 | 7.48   | 6.55   |
| 7.17   | 9.69  | 9.14   | 8.08  | 8.03  | 10.29 | 9.94  | 8.55   | 7.15   |
| 7.88   | 9.89  | 8.64   | 2.93  | 7.25  | 6.44  | 5.87  | 9.3    | 7.61   |
| 6.47   | 9.87  | 6.53   | 6.8   | 8.4   | 9.67  | 9.78  | 9.11   | 6.23   |
| 6.13   | 10.36 | 7.98   | 4.97  | 8.49  | 10.06 | 10.32 | 8.75   | 5.76   |
| 6.66   | 10.12 | 7.09   | 6.68  | 8.06  | 9.97  | 10.07 | 9.29   | 5.93   |
| 4.69   | 10.33 | 6.38   | 6.49  | 5.45  | 9.64  | 9.8   | 10.45  | 5.84   |
| 4.36   | 10.83 | 7.56   | 7     | 6.1   | 8.82  | 9.72  | 10.37  | 4.76   |
| 5.01   | 9.99  | 6.71   | 5.5   | 5.45  | 7.38  | 8.69  | 11.06  | 5.58   |
| 4.33   | 10.15 | 6.64   | 6.9   | 5.2   | 8.24  | 8.78  | 10.67  | 4.74   |
| 7.22   | 8.87  | 8.52   | 8.32  | 8     | 9.09  | 8.65  | 8.39   | 6      |
| 6.98   | 8.69  | 8.35   | 8.14  | 8.14  | 9.43  | 8.98  | 8.27   | 5.98   |
| 6.39   | 8.42  | 7.85   | 8.2   | 7.81  | 8.91  | 8.32  | 7.84   | 5.61   |
| 6.5    | 9     | 8.37   | 8.95  | 8.5   | 9.6   | 9.36  | 8.15   | 4.57   |
| 7.56   | 8.53  | 7.99   | 7.9   | 9.32  | 12.29 | 11.91 | 8.97   | 5.18   |
| 6.15   | 9.51  | 7.1    | 6.17  | 7.2   | 9.34  | 8.84  | 8.11   | 6.31   |
| 4.91   | 9.46  | 6.51   | 7.24  | 7.47  | 9.98  | 9.17  | 8.5    | 6.66   |
| 4.9    | 9.08  | 6.09   | 7.22  | 6.69  | 9.45  | 8.39  | 8.77   | 6.87   |
| 6.22   | 10.32 | 7.32   | 11.58 | 10.24 | 12.01 | 10.99 | 9.8    | 6.19   |
| 6.85   | 10.22 | 7.85   | 11.52 | 9.83  | 11.7  | 10.57 | 9.49   | 5.4    |
| 7.28   | 10.26 | 7.06   | 11.64 | 9.99  | 11.71 | 10.75 | 9.61   | 5.14   |

<https://mc.manuscriptcentral.com/gut>

1  
2  
3  
4  
5  
6  
7  
8  
9  
10  
11  
12  
13  
14  
15  
16  
17  
18  
19  
20  
21  
22  
23  
24  
25  
26  
27  
28  
29  
30  
31  
32  
33  
34  
35  
36  
37  
38  
39  
40  
41  
42  
43  
44  
45  
46  
47  
48  
49  
50  
51  
52  
53  
54  
55  
56  
57  
58  
59  
60

|       |       |       |       |       |       |       |       |      |
|-------|-------|-------|-------|-------|-------|-------|-------|------|
| 6.86  | 10.26 | 7.13  | 10.95 | 9.38  | 11.52 | 10.37 | 9.86  | 5.66 |
| 6.54  | 10.78 | 8.96  | 8.69  | 8.88  | 12.58 | 10.75 | 8     | 6.84 |
| 6.49  | 10.6  | 8.58  | 8.23  | 8.21  | 12.3  | 10.27 | 7.88  | 7.03 |
| 6.29  | 10.45 | 8.47  | 8.88  | 9.04  | 12.21 | 10.32 | 7.86  | 6.9  |
| 6.52  | 10.6  | 8.39  | 8.18  | 8.28  | 11.84 | 10.21 | 8.26  | 7.2  |
| 5.55  | 10.55 | 8.32  | 6.62  | 8.09  | 11.01 | 9.75  | 9.34  | 6.21 |
| 5.5   | 10.89 | 9.53  | 6.8   | 8.32  | 11.92 | 10.05 | 8.47  | 6.27 |
| 4.36  | 11.27 | 10.16 | 5.93  | 8.26  | 11.64 | 10.22 | 7.44  | 5.54 |
| 3.76  | 10.85 | 9.47  | 6.91  | 7.68  | 11.57 | 9.71  | 8.45  | 6.11 |
| 8.42  | 10.97 | 8.28  | 6.72  | 8.49  | 10.1  | 10.68 | 8.58  | 5.44 |
| 7.85  | 11.1  | 9.05  | 8.27  | 7.77  | 9.88  | 10.34 | 8.55  | 5.93 |
| 7.64  | 11.04 | 9.22  | 8.37  | 8.26  | 10.08 | 10.7  | 8.02  | 5.43 |
| 8.27  | 11.04 | 9     | 7.97  | 8.03  | 9.75  | 10.58 | 8.27  | 5.47 |
| 10.54 | 8.47  | 13.8  | 7.74  | 8.74  | 10.2  | 9.79  | 9.24  | 6.74 |
| 9.2   | 9.84  | 10.59 | 6.83  | 7.77  | 11.31 | 10.47 | 10.38 | 7.11 |
| 8.29  | 9.53  | 9.16  | 6.92  | 7     | 10.06 | 9.44  | 9.75  | 6.89 |
| 10.66 | 9.79  | 11.99 | 1.83  | 9.36  | 8.9   | 8.34  | 8.92  | 8.81 |
| 10.17 | 9.34  | 11.73 | 3.36  | 9.68  | 10.49 | 8.82  | 8.58  | 8.89 |
| 6.48  | 9.92  | 8.79  | 7.25  | 6.85  | 12.11 | 10.23 | 7.43  | 6.31 |
| 6.49  | 10.1  | 9.09  | 6.85  | 7     | 12.73 | 10.54 | 7.21  | 6.4  |
| 6.87  | 9.93  | 8.93  | 7.06  | 7.12  | 12.1  | 10.22 | 8.19  | 6.55 |
| 5.16  | 11.46 | 8.98  | 10.49 | 10.99 | 12.62 | 11.01 | 8.54  | 6.34 |
| 6.72  | 10.97 | 8.61  | 10.19 | 10.69 | 12.51 | 10.65 | 8.32  | 6.45 |
| 7.49  | 10.5  | 8.43  | 10.08 | 9.73  | 11.44 | 9.41  | 8.8   | 6.75 |
| 8.16  | 10.85 | 10.13 | 8.14  | 7.38  | 11.86 | 10.47 | 9.43  | 6.25 |
| 7.92  | 10.69 | 10.11 | 8.72  | 8.11  | 12.47 | 11.16 | 9.66  | 5.97 |
| 7.95  | 10.53 | 9.76  | 8.79  | 7.69  | 12.52 | 11.15 | 9.73  | 5.94 |
| 6.63  | 9.49  | 8.59  | 10.54 | 9.27  | 10.77 | 9.34  | 8.55  | 6.14 |
| 6.47  | 9.3   | 8.59  | 10.75 | 9.63  | 10.82 | 9.13  | 8.33  | 6.28 |
| 7     | 9.39  | 8.66  | 10.23 | 9.42  | 10.61 | 9.23  | 8.69  | 5.91 |
| 7.61  | 10.4  | 8.97  | 8.44  | 9.79  | 11.82 | 10.39 | 8.49  | 7.52 |
| 7.67  | 10.71 | 9.25  | 8.78  | 9.7   | 11.34 | 10.79 | 7.77  | 6.98 |
| 8.41  | 10.75 | 9.6   | 8.67  | 10.16 | 11.88 | 11.03 | 8.09  | 7.37 |
| 6.81  | 10.48 | 7.94  | 7.26  | 7.85  | 10.56 | 9.11  | 8.81  | 6.68 |
| 7.1   | 10.71 | 8.46  | 7     | 8.37  | 10.57 | 9.43  | 8.88  | 6.83 |
| 7.23  | 10.71 | 8.18  | 7.64  | 8     | 10.73 | 9.2   | 8.93  | 7.07 |
| 7.27  | 9.66  | 8.48  | 7.63  | 8.16  | 10.18 | 9.15  | 8.97  | 6.86 |
| 7.27  | 9.66  | 8.48  | 7.63  | 8.16  | 10.18 | 9.15  | 8.97  | 6.86 |
| 7.78  | 9.91  | 9.06  | 6.36  | 9.21  | 11.65 | 10.59 | 8.6   | 6.94 |
| 7.63  | 10.01 | 8.72  | 6.22  | 8.7   | 11.2  | 10.27 | 8.71  | 7.17 |
| 7.45  | 9.94  | 8.64  | 7.34  | 8.57  | 10.73 | 9.88  | 8.83  | 6.21 |
| 7.81  | 9.38  | 8.48  | 7.7   | 6.31  | 9.66  | 9.07  | 8.7   | 6.41 |
| 7.14  | 10.26 | 8.44  | 7.84  | 6.41  | 10.48 | 10.63 | 8.63  | 6.62 |
| 7.62  | 10.82 | 8.79  | 8.23  | 7     | 11.05 | 11.47 | 7.9   | 6.29 |
| 7.68  | 9.98  | 8.65  | 7.31  | 6.57  | 10.04 | 10.21 | 8.5   | 6.93 |
| 3.9   | 10.7  | 9.18  | 8.34  | 10.03 | 11.47 | 11.3  | 9.02  | 5.12 |
| 3.4   | 10.69 | 9.38  | 9.09  | 10.31 | 11.98 | 11.54 | 7.45  | 4.6  |
| 4.69  | 10.55 | 9.35  | 8.65  | 10.27 | 11.89 | 11.52 | 10.11 | 5.47 |
| 7.55  | 9.07  | 8.38  | 7.61  | 6.84  | 8.49  | 7.87  | 8.86  | 6.46 |
| 7.47  | 9.22  | 8.45  | 8.39  | 8.4   | 9.79  | 8.18  | 9.16  | 7.43 |
| 7.51  | 9.19  | 8.08  | 8.89  | 8.51  | 10.13 | 8.53  | 8.91  | 6.36 |
| 7.11  | 9.4   | 7.52  | 7.2   | 6.57  | 10.74 | 9.63  | 8.21  | 6.18 |

<https://mc.manuscriptcentral.com/gut>



|    |      |       |       |       |      |       |       |       |      |
|----|------|-------|-------|-------|------|-------|-------|-------|------|
| 1  |      |       |       |       |      |       |       |       |      |
| 2  | 6.62 | 9.85  | 7.25  | 7.46  | 6.59 | 10.88 | 9.64  | 8.16  | 5.84 |
| 3  | 8.13 | 9.22  | 8.63  | 6.67  | 7.25 | 11.01 | 9.5   | 8.55  | 7.33 |
| 4  | 7.69 | 10.61 | 8.6   | 7.81  | 6.85 | 8.2   | 8.75  | 9.28  | 7.28 |
| 5  | 7.31 | 11.33 | 8.92  | 9.53  | 8.92 | 11.4  | 10.59 | 9.35  | 7.03 |
| 6  | 7.43 | 11.3  | 8.13  | 9.08  | 9.11 | 10.59 | 9.82  | 9.38  | 8.21 |
| 7  |      |       |       |       |      |       |       |       |      |
| 8  | 6.49 | 10.57 | 7.57  | 9.08  | 8.17 | 10.48 | 10.95 | 10.24 | 6.83 |
| 9  | 4.41 | 10.98 | 8.97  | 5.74  | 7.61 | 10.16 | 10.81 | 8.41  | 4.91 |
| 10 | 5.22 | 10.98 | 9.2   | 6.17  | 7.4  | 10.1  | 10.89 | 8.63  | 5.4  |
| 11 | 6.66 | 10.9  | 10.73 | 8.02  | 8.89 | 12.13 | 12.72 | 10.83 | 7.99 |
| 12 | 8.89 | 10.45 | 7.24  | 10.26 | 9.21 | 11.75 | 10.81 | 9.33  | 6.38 |
| 13 | 8.63 | 10.2  | 7.62  | 10.08 | 9.48 | 11.45 | 10.67 | 8.06  | 4.81 |
| 14 | 8.04 | 9.72  | 7.8   | 9.31  | 8.75 | 10.76 | 10.07 | 7.84  | 5.14 |
| 15 | 9.26 | 10.12 | 8.8   | 10.33 | 9.47 | 13.04 | 11.72 | 10.47 | 6.9  |
| 16 | 9.14 | 9.24  | 10.51 | 2.01  | 8.66 | 9.04  | 7.79  | 8.69  | 8.29 |
| 17 | 5.41 | 10.22 | 8.96  | 9     | 8.2  | 10.68 | 9.75  | 6.8   | 5.08 |
| 18 | 3.83 | 10.33 | 8.82  | 8.87  | 8.24 | 10.72 | 9.86  | 7.21  | 4.96 |
| 19 | 5.22 | 10.38 | 8.79  | 9     | 8.24 | 10.72 | 9.9   | 7.4   | 4.95 |
| 20 | 5.86 | 10.53 | 7.2   | 6.65  | 5.62 | 11.39 | 9.81  | 9.81  | 4.24 |
| 21 | 7.17 | 9.93  | 8.15  | 5.61  | 6.5  | 10.77 | 9.06  | 9.16  | 5.89 |
| 22 | 6.9  | 10.25 | 7.95  | 6.41  | 5.89 | 11.23 | 9.42  | 9.82  | 5.15 |
| 23 | 9.62 | 7.75  | 11.39 | 8.62  | 8.97 | 13.1  | 11.79 | 11.05 | 8.33 |
| 24 | 5.79 | 10.88 | 7.43  | 9.38  | 9.65 | 11.5  | 9.81  | 7.94  | 4.3  |
| 25 | 6.44 | 10.53 | 7.54  | 9.21  | 9.48 | 11.02 | 9.63  | 9.32  | 6.21 |
| 26 | 6.13 | 10.21 | 8.18  | 10.25 | 9.19 | 11.51 | 10.98 | 8.67  | 6.31 |
| 27 | 6.19 | 10.1  | 8.64  | 10.48 | 8.67 | 12.09 | 10.9  | 9.71  | 7.61 |
| 28 | 5.63 | 9.78  | 7.44  | 9.96  | 8.01 | 10.86 | 9.72  | 9.57  | 6.21 |
| 29 | 8.41 | 8.66  | 9.22  | 6.17  | 8.46 | 8.82  | 8.48  | 8.36  | 8.07 |
| 30 | 8.52 | 8.28  | 9.47  | 3.67  | 8    | 8.54  | 8.04  | 8.4   | 8.04 |
| 31 | 8.19 | 8.29  | 9.26  | 2.77  | 7.23 | 7.96  | 7.41  | 7.77  | 6.98 |
| 32 | 3.18 | 8.88  | 6.22  | 8.51  | 4.65 | 9.84  | 8.66  | 8.25  | 4.96 |
| 33 | 3.91 | 8.83  | 6.35  | 7.92  | 4.5  | 8.62  | 7.71  | 8.66  | 6.21 |
| 34 | 4.86 | 9.51  | 8.17  | 8.08  | 5.15 | 9.76  | 9.33  | 8.28  | 6.39 |
| 35 | 3.16 | 8.82  | 5.51  | 8.61  | 4.4  | 9.25  | 7.49  | 8.89  | 6.61 |
| 36 | 7.65 | 8.13  | 8.76  | 5.04  | 7.08 | 8.63  | 7.71  | 7.97  | 6.93 |
| 37 | 6.87 | 8.05  | 7.34  | 4.57  | 6.23 | 8.84  | 7.61  | 7.39  | 5.84 |
| 38 | 6.68 | 8.54  | 7.74  | 5.34  | 6.91 | 9.01  | 7.76  | 7.52  | 6.59 |
| 39 | 8.36 | 8.47  | 9.54  | 0.91  | 7.98 | 7.74  | 6.89  | 7.41  | 7.1  |
| 40 | 7.42 | 7.86  | 8.32  | 2.92  | 6.62 | 7.42  | 6.98  | 7.62  | 7.09 |
| 41 | 7.38 | 7.47  | 8.02  | 3.1   | 6.65 | 7.64  | 7.21  | 7.27  | 6.38 |
| 42 | 7.46 | 7.54  | 8.05  | 4.01  | 6.46 | 7.33  | 7.24  | 7.55  | 6.68 |
| 43 | 9.93 | 8.19  | 11.77 | 2.41  | 8    | 6.93  | 7.32  | 5.87  | 6.41 |
| 44 | 8.47 | 8.49  | 9.39  | 5.14  | 7.8  | 8.75  | 7.89  | 8.68  | 7.88 |
| 45 | 8.78 | 8.89  | 9.87  | 1.33  | 7.93 | 8.71  | 8.19  | 8.46  | 7.67 |
| 46 | 7.9  | 9.06  | 9.07  | 4.45  | 7.41 | 9.2   | 9.36  | 8.53  | 7.5  |
| 47 | 8.32 | 8.57  | 9.62  | 2.56  | 7.32 | 8.41  | 8.27  | 8.1   | 7.23 |
| 48 | 7.94 | 9.17  | 9.05  | 8.65  | 7.46 | 8.73  | 7.46  | 8.35  | 7.35 |
| 49 | 8.62 | 8.81  | 9.47  | 5.46  | 8.02 | 8.54  | 7.58  | 8.49  | 7.55 |
| 50 | 8.23 | 8.43  | 9.21  | 3.03  | 7.43 | 8.12  | 7.03  | 8.63  | 6.46 |
| 51 | 9.09 | 8.89  | 10.17 | 5.51  | 8.19 | 8.4   | 7.11  | 7.91  | 8.06 |
| 52 | 8.48 | 9.55  | 7.33  | 6.9   | 8.64 | 9.76  | 9.74  | 7.87  | 4.67 |
| 53 | 8.38 | 9.94  | 7.66  | 8.43  | 9.06 | 10.29 | 9.76  | 8     | 5.14 |
| 54 | 8.56 | 9.92  | 8.19  | 8.35  | 9.08 | 9.98  | 9.68  | 8.1   | 6.34 |

<https://mc.manuscriptcentral.com/gut>

1  
2  
3  
4  
5  
6  
7  
8  
9  
10  
11  
12  
13  
14  
15  
16  
17  
18  
19  
20  
21  
22  
23  
24  
25  
26  
27  
28  
29  
30  
31  
32  
33  
34  
35  
36  
37  
38  
39  
40  
41  
42  
43  
44  
45  
46  
47  
48  
49  
50  
51  
52  
53  
54  
55  
56  
57  
58  
59  
60

|      |       |       |       |       |       |       |       |      |
|------|-------|-------|-------|-------|-------|-------|-------|------|
| 9.04 | 9.6   | 7.99  | 8.21  | 8.92  | 9.88  | 8.93  | 8.18  | 6.36 |
| 7.37 | 10.4  | 9.52  | 7.83  | 10.24 | 10.78 | 10.81 | 9.24  | 7.12 |
| 8.05 | 10.37 | 9.85  | 6.96  | 10.02 | 10.7  | 10.41 | 9.16  | 7.53 |
| 7.28 | 10.09 | 9.77  | 8.18  | 10.71 | 11.08 | 10.92 | 8.19  | 7.1  |
| 7.35 | 10.2  | 9.96  | 8.27  | 10.45 | 11.05 | 10.92 | 8.31  | 7    |
| 7.91 | 11.11 | 9.03  | 9.06  | 8.24  | 10.63 | 11.15 | 9.35  | 6.97 |
| 7.72 | 11.62 | 10.07 | 9.05  | 9.02  | 12.32 | 11.94 | 9.87  | 6.99 |
| 7.16 | 11.8  | 9.51  | 8.75  | 9.55  | 12    | 11.55 | 9.31  | 6.41 |
| 6.93 | 10.95 | 9.44  | 8.57  | 9.28  | 11.31 | 10.83 | 10.46 | 8.23 |
| 7.42 | 11.15 | 9.04  | 11.21 | 10.36 | 12.63 | 11.89 | 9.27  | 6.16 |
| 7.25 | 10.29 | 8.96  | 10.96 | 9.32  | 11.29 | 10.6  | 9.31  | 7    |
| 7.11 | 10.32 | 8.72  | 11.51 | 9.78  | 11.92 | 10.69 | 9.49  | 6.53 |
| 7.43 | 10.44 | 9.18  | 11.06 | 9.75  | 11.96 | 11.2  | 8.78  | 6.68 |
| 7.2  | 10.21 | 8.43  | 9.14  | 8.47  | 10.13 | 11.29 | 8.24  | 6.14 |
| 6.69 | 10.71 | 8.86  | 9.22  | 9.11  | 10.94 | 12.04 | 8.35  | 5.34 |
| 6.89 | 9.73  | 7.98  | 8.68  | 7.62  | 10.23 | 11.06 | 9.33  | 7.06 |
| 4.75 | 9.79  | 6.96  | 7.58  | 5.64  | 9.55  | 8.11  | 9.72  | 6.71 |
| 6.22 | 10.14 | 9.07  | 7.91  | 8.39  | 9.84  | 9.64  | 9.02  | 6.47 |
| 4.84 | 10.08 | 7.66  | 8.2   | 6.65  | 9.35  | 8.8   | 9.51  | 5.8  |
| 5.74 | 10.48 | 8.37  | 8.61  | 9.51  | 10.75 | 10.22 | 8.52  | 6.64 |
| 4.45 | 10.34 | 9.04  | 9.4   | 9.85  | 11.87 | 9.79  | 8.59  | 5.35 |
| 3.73 | 10.32 | 8.79  | 8.26  | 10.18 | 12.08 | 10.15 | 6.89  | 4.94 |
| 6.78 | 10.72 | 8.3   | 6.01  | 7.45  | 9.84  | 9.02  | 8.89  | 6.23 |
| 6.57 | 10.84 | 7.62  | 5.74  | 8.3   | 10.96 | 9.5   | 8.83  | 6.57 |
| 7.54 | 11.09 | 9.86  | 9.15  | 8.85  | 12.92 | 10.59 | 10.54 | 8.24 |
| 4.36 | 8.85  | 4.36  | 6.01  | 7.68  | 8.91  | 8.19  | 8.86  | 5.12 |
| 6.72 | 9.04  | 7.49  | 5.79  | 7.79  | 8.77  | 8.39  | 8.64  | 5.65 |
| 6.27 | 8.96  | 6.35  | 6.09  | 8.9   | 9.72  | 9.27  | 8.06  | 5.05 |
| 5.22 | 8.48  | 5.81  | 5.6   | 8.45  | 9.7   | 8.88  | 9.19  | 6.15 |
| 7.28 | 9.7   | 8.13  | 2.76  | 7.01  | 6.89  | 7.08  | 7.85  | 7.08 |
| 7.11 | 10.02 | 7.97  | 4.18  | 6.91  | 7.87  | 8.49  | 7.99  | 6.91 |
| 7.39 | 9.59  | 8.16  | 0.88  | 6.56  | 7.31  | 6.24  | 7.64  | 6.72 |
| 7.24 | 9.83  | 8.11  | 0.96  | 6.68  | 7.11  | 6.91  | 7.46  | 6.79 |
| 6.64 | 9.53  | 8.31  | 6.11  | 8.21  | 9.25  | 8.33  | 7.42  | 5.57 |
| 7.06 | 8.69  | 8.08  | 5.61  | 7.86  | 8.75  | 7.81  | 7.8   | 6.64 |
| 6.72 | 8.71  | 7.7   | 5.81  | 7.54  | 8.75  | 7.47  | 7.82  | 6.12 |
| 6.42 | 8.74  | 7.32  | 6.95  | 7.28  | 9.34  | 7.43  | 8.09  | 6.1  |
| 5.4  | 10.5  | 5.48  | 3.35  | 3.81  | 3.35  | 2.68  | 10.04 | 6.78 |
| 7.37 | 11.48 | 8.89  | 8.38  | 9.97  | 11.95 | 10.49 | 8.46  | 6.82 |
| 5.97 | 10.52 | 8.7   | 8.49  | 1.42  | 10.28 | 9.93  | 9.6   | 6.33 |
| 7.14 | 10.35 | 9.46  | 8.61  | 2.23  | 11.56 | 10.83 | 11.39 | 7.82 |
| 6.37 | 9.46  | 8.78  | 7.17  | 8.42  | 10.69 | 10.13 | 8.44  | 6.6  |
| 6.83 | 9.97  | 8.83  | 8.51  | 4.51  | 10.49 | 10.81 | 11.2  | 8.76 |
| 4.87 | 10    | 8.3   | 7.3   | 8.01  | 11.57 | 10.11 | 8.98  | 5.54 |
| 4.39 | 10.02 | 8.48  | 8.35  | 7.81  | 12.23 | 10.09 | 8.96  | 4.69 |
| 5.77 | 10.03 | 6.87  | 8.59  | 10.01 | 11.48 | 10.63 | 5.89  | 3.27 |
| 6.8  | 9.83  | 8.18  | 9.03  | 9.06  | 10.92 | 10.09 | 8.68  | 6.15 |
| 5.74 | 10.11 | 7.42  | 9.2   | 9.35  | 10.9  | 10.31 | 8.37  | 5.7  |
| 6.86 | 9.63  | 8.11  | 8.02  | 8.72  | 10.34 | 9.53  | 8.41  | 6.61 |
| 5.27 | 9.94  | 6.9   | 6.33  | 8.71  | 11.26 | 8.88  | 8.62  | 4.22 |
| 6.08 | 9.25  | 7.63  | 5.92  | 7.43  | 9.18  | 7.77  | 8.36  | 5.62 |
| 6.23 | 9.06  | 7.85  | 5.29  | 7.17  | 9.29  | 7.68  | 8.52  | 6.16 |

<https://mc.manuscriptcentral.com/gut>

1  
2  
3  
4  
5  
6  
7  
8  
9  
10  
11  
12  
13  
14  
15  
16  
17  
18  
19  
20  
21  
22  
23  
24  
25  
26  
27  
28  
29  
30  
31  
32  
33  
34  
35  
36  
37  
38  
39  
40  
41  
42  
43  
44  
45  
46  
47  
48  
49  
50  
51  
52  
53  
54  
55  
56  
57  
58  
59  
60

|      |       |       |      |      |       |       |       |      |
|------|-------|-------|------|------|-------|-------|-------|------|
| 6.28 | 9.43  | 6.49  | 7.4  | 7.57 | 10.03 | 8.54  | 9     | 4.7  |
| 6.59 | 9.31  | 8.95  | 7.81 | 7.76 | 11.56 | 9.28  | 7.56  | 6.56 |
| 6.14 | 9.05  | 7.62  | 7.98 | 8.17 | 10.53 | 9.34  | 7.75  | 5.76 |
| 5.98 | 9.16  | 7.78  | 8.15 | 8.14 | 10.59 | 9.46  | 6.7   | 5.53 |
| 7.53 | 7.72  | 9.37  | 6.36 | 8.23 | 10.08 | 9.12  | 8.15  | 7.14 |
| 8.44 | 9.8   | 8.46  | 7.79 | 9.55 | 11.46 | 9.81  | 8.69  | 4.81 |
| 9.54 | 9.63  | 9.01  | 7.17 | 9.4  | 10.67 | 10.2  | 7.96  | 2.53 |
| 9.63 | 9.65  | 8.91  | 7.59 | 9.53 | 10.9  | 10.32 | 7.96  | 3.52 |
| 8.09 | 8.07  | 9.14  | 2.27 | 7.59 | 8.45  | 7.53  | 7.66  | 6.96 |
| 7.48 | 8.92  | 8.5   | 6.32 | 6.83 | 8.5   | 8.17  | 8.28  | 6.74 |
| 5.38 | 9.83  | 7.72  | 8.36 | 4.24 | 9.2   | 8.29  | 9.36  | 5.78 |
| 6.38 | 9.7   | 8.11  | 7.64 | 5.93 | 9.32  | 8.44  | 8.46  | 6.5  |
| 7.12 | 10.01 | 8.33  | 7.71 | 5.89 | 9.01  | 9.16  | 9.06  | 6.57 |
| 6.34 | 9.33  | 8.04  | 6.7  | 5.8  | 7.98  | 7.2   | 9.15  | 6.77 |
| 6.13 | 10.67 | 10.89 | 8.16 | 4.54 | 11.62 | 13.98 | 10.38 | 7.59 |
| 6.07 | 9.18  | 8.2   | 7.52 | 6.5  | 10.47 | 10.56 | 8.48  | 5.26 |
| 6.91 | 9.1   | 8.02  | 4.04 | 6.69 | 9.57  | 8.26  | 8.13  | 6.51 |
| 5.86 | 9.23  | 8.2   | 7.51 | 6.98 | 10.83 | 10.86 | 8.77  | 5.21 |

1  
2  
3  
4  
5  
6  
7  
8  
9  
10  
11  
12  
13  
14  
15  
16  
17  
18  
19  
20  
21  
22  
23  
24  
25  
26  
27  
28  
29  
30  
31  
32  
33  
34  
35  
36  
37  
38  
39  
40  
41  
42  
43  
44  
45  
46  
47  
48  
49  
50  
51  
52  
53  
54  
55  
56  
57  
58  
59  
60

| CLIC4 | CLU   | CMA1 | CNN1 | COL18A1 | COL1A1 | COL1A2 | COL3A1 | COL4A1 |
|-------|-------|------|------|---------|--------|--------|--------|--------|
| 7.98  | 12.26 | 3.15 | 2.15 | 9.04    | 12.63  | 10.6   | 12.34  | 10.38  |
| 8.77  | 7.85  | 3.54 | 4.96 | 10.33   | 12.02  | 10.35  | 12.67  | 11.91  |
| 8.38  | 8.53  | 3.67 | 4.25 | 10.04   | 12.13  | 10.4   | 12.56  | 11.38  |
| 9.56  | 10.33 | 5.04 | 7.44 | 11.06   | 13.69  | 12.13  | 13.91  | 12.61  |
| 6.76  | 8.61  | 1.01 | 3.01 | 7.75    | 10.37  | 7.42   | 8.29   | 7.8    |
| 8.91  | 9.41  | 0.49 | 5.16 | 9.39    | 13.07  | 11.13  | 13.11  | 10.56  |
| 8.74  | 9.42  | 1.5  | 4.31 | 9.8     | 13.17  | 11.04  | 13.12  | 11.27  |
| 9.28  | 11.07 | 2.39 | 7.37 | 10.24   | 14.78  | 12.79  | 13.96  | 12.23  |
| 9.61  | 13.02 | 2.95 | 5.12 | 10.01   | 14.38  | 12.16  | 13.51  | 12.55  |
| 8.82  | 9.14  | 0    | 3.23 | 9.05    | 12.97  | 11.08  | 12.7   | 9.88   |
| 9.4   | 10.15 | 2.38 | 5.93 | 9.4     | 13.28  | 11.18  | 12.87  | 10.58  |
| 9.77  | 10.95 | 5    | 7.3  | 10.09   | 14.42  | 12.2   | 13.8   | 11.35  |
| 7.78  | 8.75  | 1.51 | 3.35 | 8.97    | 13.1   | 10.86  | 12.83  | 9.78   |
| 8.45  | 8.15  | 1.26 | 3.76 | 9.76    | 14.91  | 12.68  | 14.5   | 10.98  |
| 8.59  | 11.93 | 1.77 | 8.44 | 9.7     | 15.8   | 13.63  | 14.48  | 12.1   |
| 9.02  | 10.44 | 2.53 | 4.75 | 9.83    | 14.14  | 11.97  | 13.87  | 11.37  |
| 9.27  | 10.11 | 2.29 | 6.29 | 9.69    | 14.33  | 12.25  | 14.05  | 10.07  |
| 9.51  | 10.02 | 0.76 | 7.24 | 10.01   | 15.17  | 13.01  | 14.67  | 11.11  |
| 8.42  | 10.26 | 3.22 | 4.22 | 10.57   | 14.51  | 12.64  | 14     | 12.34  |
| 9.32  | 9.75  | 2.12 | 6.78 | 10.79   | 13.38  | 11.57  | 13.44  | 11.7   |
| 9.4   | 10.9  | 4.59 | 8.6  | 10.51   | 13.57  | 11.59  | 13.59  | 12.04  |
| 10.36 | 10.16 | 1.15 | 7.99 | 10.74   | 13.99  | 12.38  | 14.82  | 12.54  |
| 10.15 | 10.96 | 1.78 | 7.02 | 10.56   | 12.82  | 11.41  | 14.32  | 12.22  |
| 10.94 | 11.2  | 3.7  | 9.54 | 10.11   | 13.89  | 12.28  | 14.8   | 11.8   |
| 8.89  | 11.21 | 3.43 | 7.07 | 10.47   | 11.19  | 9.04   | 11.08  | 11.03  |
| 9.45  | 11.07 | 0.13 | 5.38 | 9.35    | 10.94  | 9.17   | 11.39  | 11.23  |
| 9.07  | 10.96 | 2.11 | 4.77 | 9.41    | 11.31  | 9.41   | 11.52  | 10.85  |
| 9.11  | 10.51 | 2.72 | 5.09 | 9.22    | 11.01  | 9.09   | 11.28  | 10.68  |
| 7.26  | 9.75  | 2.02 | 4.02 | 8.93    | 12.37  | 9.99   | 11.42  | 10.84  |
| 8.2   | 9.86  | 3.77 | 6.25 | 9.22    | 11.61  | 9.95   | 11.76  | 10.54  |
| 8.07  | 10.38 | 2.2  | 5.98 | 8.97    | 11.54  | 9.6    | 11.56  | 10.64  |
| 8     | 9.91  | 4.52 | 5.1  | 9.25    | 13.59  | 11.25  | 12.84  | 11     |
| 7.87  | 11.37 | 5.13 | 1.67 | 8.44    | 9.08   | 7.14   | 9.07   | 8.63   |
| 10.22 | 11.03 | 1.06 | 7.47 | 11.15   | 14.67  | 12.51  | 14.51  | 12.43  |
| 9.77  | 11.1  | 1.2  | 5.88 | 10.79   | 13.86  | 11.68  | 13.55  | 12.37  |
| 9.91  | 11.69 | 2.79 | 7.75 | 10.66   | 14.57  | 12.51  | 14.28  | 12.32  |
| 7.95  | 11.45 | 2.45 | 3.25 | 8.82    | 12.61  | 10.69  | 11.91  | 11     |
| 8.26  | 8.38  | 0.99 | 4.05 | 8.7     | 13.01  | 11.12  | 13.44  | 10.04  |
| 8.39  | 8.89  | 2.69 | 4.45 | 9.15    | 13.87  | 11.97  | 13.87  | 10.45  |
| 8.26  | 9.67  | 2.91 | 6.71 | 8.76    | 13.17  | 11.3   | 13.4   | 9.72   |
| 8.12  | 9.02  | 1.51 | 3.9  | 9.15    | 13.14  | 10.94  | 12.44  | 10.94  |
| 8.56  | 8.57  | 0    | 4.07 | 8.93    | 13.33  | 11.18  | 12.82  | 9.71   |
| 8.18  | 8.29  | 0.22 | 3.8  | 8.6     | 13.06  | 10.78  | 12.42  | 9.48   |
| 8.66  | 8.92  | 1.82 | 3.14 | 8.73    | 13.43  | 11.32  | 12.82  | 9.93   |
| 7.11  | 13.28 | 3.86 | 4.45 | 8.86    | 13.02  | 10.65  | 11.27  | 11.67  |
| 8.4   | 11.05 | 1.9  | 5.56 | 9.42    | 11.27  | 9.9    | 12.3   | 10.36  |
| 8.61  | 11.17 | 2.58 | 4.64 | 10.09   | 12.71  | 11.26  | 13.48  | 11.33  |
| 9.64  | 11.13 | 2.39 | 8.22 | 9.86    | 14.21  | 12.47  | 14.64  | 11.17  |
| 9.22  | 9.6   | 2.63 | 5.49 | 10.22   | 13.83  | 11.83  | 13.47  | 11.64  |
| 9.43  | 10.13 | 1.01 | 5.5  | 10.44   | 14.36  | 12.6   | 14.57  | 11.75  |
| 8.93  | 11.53 | 1.5  | 4.95 | 10.13   | 13.28  | 11.65  | 13.39  | 11.08  |

<https://mc.manuscriptcentral.com/gut>

|    |       |       |      |      |       |       |       |       |       |
|----|-------|-------|------|------|-------|-------|-------|-------|-------|
| 1  |       |       |      |      |       |       |       |       |       |
| 2  | 9.73  | 10.64 | 3.54 | 7.11 | 10.5  | 14.64 | 12.77 | 14.78 | 11.32 |
| 3  | 8.12  | 7.89  | 2.03 | 3.35 | 9.15  | 12.74 | 10.75 | 11.85 | 10.9  |
| 4  | 8.82  | 7.11  | 0.19 | 4.44 | 9.9   | 12.47 | 10.93 | 12.87 | 11.44 |
| 5  | 8.69  | 7.61  | 0    | 3.28 | 9.62  | 12.31 | 10.86 | 12.75 | 11.05 |
| 6  | 9.03  | 8.86  | 3.14 | 7.02 | 9.24  | 12.33 | 10.57 | 12.59 | 10.27 |
| 7  | 8.84  | 12.22 | 2.55 | 3.55 | 9.73  | 12.79 | 10.79 | 12.89 | 11.5  |
| 8  | 9.61  | 12.86 | 3.05 | 6    | 10.22 | 12.97 | 11.25 | 13.05 | 11.69 |
| 9  | 8.63  | 13.34 | 2    | 3.46 | 9.37  | 12.27 | 10.67 | 12.35 | 10.99 |
| 10 | 9.63  | 12.19 | 2.76 | 7.88 | 10.07 | 13    | 11.33 | 12.84 | 11.68 |
| 11 | 8.85  | 10.84 | 2.75 | 2.58 | 8.95  | 12.27 | 10.25 | 12.16 | 10.73 |
| 12 | 9.31  | 10.55 | 2.13 | 4.79 | 9.5   | 12    | 10.26 | 12.19 | 10.9  |
| 13 | 8.86  | 10.26 | 1.82 | 3.82 | 9.22  | 12.13 | 10.29 | 12.27 | 10.64 |
| 14 | 9.38  | 10.56 | 2.98 | 7.53 | 9.1   | 12.39 | 10.57 | 12.42 | 10.27 |
| 15 | 7.74  | 9.47  | 5.15 | 5.15 | 7.74  | 11.71 | 10.32 | 9.24  | 9.32  |
| 16 | 9.23  | 9.45  | 0.79 | 4.79 | 8.99  | 14.3  | 11.92 | 12.72 | 11.3  |
| 17 | 9.09  | 8.54  | 1.86 | 4.83 | 8.76  | 13.19 | 10.92 | 12.34 | 10.3  |
| 18 | 7.39  | 9.9   | 1.24 | 0.24 | 9.4   | 9.54  | 7.26  | 8.66  | 3.41  |
| 19 | 6.88  | 10.17 | 0.77 | 0.77 | 9.52  | 10.49 | 8.15  | 8.57  | 6.71  |
| 20 | 8.52  | 11.12 | 2.72 | 3.14 | 9.32  | 11.79 | 9.65  | 11.16 | 10.87 |
| 21 | 7.94  | 11.42 | 1.58 | 2.07 | 8.87  | 10.94 | 8.73  | 10.53 | 10.34 |
| 22 | 8.4   | 10.97 | 3.58 | 3.99 | 8.77  | 12.41 | 10.23 | 11.92 | 10.03 |
| 23 | 9.29  | 10.21 | 3.27 | 5.95 | 10.4  | 12.82 | 11.34 | 13.89 | 11.05 |
| 24 | 9.45  | 9.67  | 4.28 | 6.94 | 9.74  | 12.19 | 10.57 | 13.37 | 10.47 |
| 25 | 9.84  | 9.83  | 4.51 | 7.09 | 9.01  | 12.48 | 10.61 | 13.76 | 10.68 |
| 26 | 9.74  | 11.04 | 2.96 | 5.39 | 10.64 | 13.85 | 11.83 | 13.56 | 10.88 |
| 27 | 10.27 | 10.65 | 2.04 | 5.5  | 11.31 | 14.75 | 12.75 | 14.58 | 11.29 |
| 28 | 10.26 | 11.56 | 3.28 | 5.78 | 11.25 | 14.81 | 12.81 | 14.74 | 11.37 |
| 29 | 9.04  | 8.57  | 1.36 | 3.68 | 9.44  | 12.86 | 10.78 | 12.95 | 10.65 |
| 30 | 9.2   | 8.64  | 3.98 | 5.37 | 9.82  | 13.27 | 11.08 | 13.34 | 10.91 |
| 31 | 9.06  | 9.67  | 4.15 | 5.93 | 9.4   | 13.05 | 10.78 | 12.96 | 10.49 |
| 32 | 8.98  | 10.29 | 5.16 | 4.21 | 10.05 | 13.17 | 11.02 | 13.08 | 10.7  |
| 33 | 8.53  | 8.74  | 0.2  | 5.41 | 10.01 | 12.35 | 10.36 | 12.72 | 10.7  |
| 34 | 8.1   | 8.32  | 1.58 | 3.9  | 9.81  | 12.4  | 10.34 | 12.43 | 10.57 |
| 35 | 9.38  | 9.48  | 2.05 | 5.86 | 10.18 | 14.05 | 11.76 | 14.04 | 10.37 |
| 36 | 8.99  | 9.67  | 2.69 | 4.27 | 9.88  | 13.88 | 11.63 | 13.9  | 10.58 |
| 37 | 9.85  | 9.75  | 2.24 | 5.88 | 10.22 | 15.23 | 12.89 | 15.06 | 11.23 |
| 38 | 8.49  | 10.34 | 3.24 | 3.76 | 9.63  | 13.31 | 11.05 | 13.22 | 10.61 |
| 39 | 8.49  | 10.34 | 3.24 | 3.76 | 9.63  | 13.31 | 11.05 | 13.22 | 10.61 |
| 40 | 8.68  | 9.46  | 2.96 | 7.1  | 9.05  | 11.79 | 10.15 | 12.33 | 9.59  |
| 41 | 9.11  | 10.42 | 4.93 | 8.61 | 9.65  | 12.93 | 10.98 | 13.05 | 10.32 |
| 42 | 9.22  | 9.66  | 1.69 | 6.99 | 9.75  | 14.54 | 12.4  | 14.48 | 10.33 |
| 43 | 7.97  | 10.21 | 3.56 | 2.56 | 8.56  | 11.12 | 8.46  | 10.44 | 8.99  |
| 44 | 9.21  | 10.35 | 2.88 | 6.11 | 10    | 13.07 | 10.72 | 12.97 | 11.11 |
| 45 | 9.14  | 10.08 | 2.27 | 5.31 | 9.9   | 12.85 | 10.51 | 12.84 | 11.05 |
| 46 | 9.19  | 10.46 | 4.86 | 8.18 | 9.41  | 12.96 | 10.58 | 12.63 | 10.53 |
| 47 | 8.52  | 11.1  | 1.73 | 5.19 | 10.03 | 13.8  | 11.82 | 13.92 | 11.28 |
| 48 | 7.9   | 11.49 | 3.25 | 3.98 | 9.75  | 13.02 | 11.07 | 13.07 | 11.22 |
| 49 | 8.35  | 11.69 | 2.84 | 6.69 | 9.77  | 15.41 | 13.08 | 14.93 | 11.71 |
| 50 | 8.15  | 10.06 | 3.15 | 2.96 | 8.52  | 12.4  | 9.8   | 11.97 | 9.5   |
| 51 | 9.51  | 10.22 | 4.18 | 7.53 | 10.27 | 14.39 | 12.07 | 14.15 | 10.75 |
| 52 | 9.53  | 9.97  | 4.26 | 8.16 | 9.4   | 13.53 | 11.2  | 13.69 | 10.46 |
| 53 | 7.92  | 9.41  | 0.4  | 3.98 | 9.26  | 13.1  | 10.81 | 12.68 | 10.25 |

|    |       |       |      |       |       |       |       |       |       |
|----|-------|-------|------|-------|-------|-------|-------|-------|-------|
| 1  |       |       |      |       |       |       |       |       |       |
| 2  | 8.56  | 8.99  | 2.47 | 4.53  | 10.02 | 13.72 | 11.3  | 13.35 | 10.89 |
| 3  | 8.23  | 9.55  | 0.78 | 6.83  | 9.61  | 14.8  | 12.31 | 13.25 | 11.39 |
| 4  | 8.24  | 12.21 | 3.42 | 3.57  | 9.42  | 12.16 | 10.12 | 11.86 | 10.31 |
| 5  | 9.96  | 11.91 | 6.55 | 6.73  | 10.59 | 13.7  | 11.88 | 13.81 | 11.11 |
| 6  | 10.45 | 12.24 | 6.22 | 7.91  | 10.75 | 14.84 | 13.11 | 14.81 | 11.48 |
| 7  | 9.07  | 12.12 | 4.21 | 5.65  | 10.05 | 14.45 | 12.22 | 14.04 | 11.79 |
| 8  | 9.19  | 11.34 | 2.36 | 4.41  | 9.81  | 13.8  | 11.69 | 13.65 | 10.9  |
| 9  | 9.44  | 11.11 | 3.34 | 5.61  | 10.17 | 14.09 | 11.92 | 13.85 | 11.11 |
| 10 | 9.05  | 12.65 | 5.49 | 10.29 | 10.65 | 15.92 | 13.79 | 14.38 | 13.06 |
| 11 | 8.01  | 12.99 | 3.6  | 4.6   | 9.86  | 14.31 | 11.6  | 12.62 | 12.27 |
| 12 | 8.64  | 10.11 | 0.49 | 5.53  | 9.18  | 12.8  | 10.66 | 11.96 | 11.09 |
| 13 | 7.54  | 9.41  | 0.89 | 3.35  | 8.44  | 11.57 | 9.53  | 11.08 | 9.43  |
| 14 | 8.9   | 11.05 | 4.26 | 8.43  | 10.28 | 16.4  | 14.2  | 14.44 | 13.2  |
| 15 | 6.1   | 9.17  | 1.52 | 0     | 8.75  | 8.6   | 5.68  | 8.98  | 1.52  |
| 16 | 9.26  | 6.01  | 0    | 4.59  | 9.77  | 13.4  | 11.42 | 13.38 | 11.17 |
| 17 | 9.45  | 5.72  | 2.42 | 3.42  | 9.99  | 12.74 | 11.16 | 12.95 | 11.41 |
| 18 | 9.41  | 7.78  | 1.84 | 6.41  | 9.78  | 12.69 | 10.91 | 12.89 | 10.78 |
| 19 | 9.12  | 8.97  | 2.02 | 4.79  | 10.14 | 14.52 | 12.21 | 13.61 | 10.2  |
| 20 | 8.55  | 9.01  | 0    | 4.13  | 9.59  | 14.43 | 12.13 | 13.73 | 9.65  |
| 21 | 8.97  | 9.56  | 1.72 | 5.64  | 10    | 14.13 | 11.88 | 13.59 | 10.32 |
| 22 | 6.75  | 14.75 | 6.16 | 6.16  | 6.75  | 15.77 | 13.41 | 11.45 | 13.68 |
| 23 | 8.23  | 11.29 | 0.13 | 2.83  | 9.67  | 11.74 | 9.66  | 11.9  | 10.94 |
| 24 | 8.64  | 11.6  | 2.54 | 5.34  | 9.66  | 12.99 | 10.74 | 12.78 | 10.74 |
| 25 | 9.34  | 12.46 | 2.77 | 7.91  | 9.83  | 13.58 | 11.53 | 13.46 | 11.6  |
| 26 | 9.44  | 12.32 | 2.91 | 8.41  | 10.39 | 14.94 | 12.85 | 14.38 | 12.55 |
| 27 | 9.89  | 11.17 | 2.86 | 6.32  | 10.85 | 16.25 | 13.73 | 15.58 | 12.61 |
| 28 | 7.42  | 9.17  | 1    | 4.7   | 8.45  | 10.47 | 9.29  | 10.47 | 9.3   |
| 29 | 7.47  | 8.4   | 2.44 | 1.86  | 8.66  | 7.91  | 5.61  | 8.13  | 0.86  |
| 30 | 6.85  | 8.32  | 2.77 | 1.77  | 7.77  | 7.23  | 5.23  | 7.74  | 5.09  |
| 31 | 8.44  | 9.56  | 1.59 | 3.01  | 9.77  | 13.64 | 11.31 | 13.55 | 10.82 |
| 32 | 9.47  | 10.66 | 2.59 | 8.12  | 10.06 | 14.78 | 12.49 | 14.33 | 10.92 |
| 33 | 9.05  | 10.53 | 2.11 | 8.17  | 9.65  | 13.78 | 11.61 | 13.44 | 10.9  |
| 34 | 9.77  | 10.74 | 3.16 | 7.1   | 10.11 | 14.79 | 12.52 | 14.57 | 11.01 |
| 35 | 6.6   | 8.22  | 0.45 | 1.45  | 7.42  | 9.89  | 8.35  | 9.59  | 8.59  |
| 36 | 6.34  | 7.56  | 0.25 | 0.25  | 6.79  | 9.65  | 7.84  | 9.38  | 7.78  |
| 37 | 6.42  | 7.29  | 0.34 | 2.15  | 7.37  | 10.06 | 8.17  | 9.94  | 8.28  |
| 38 | 5.85  | 8.37  | 0    | 0     | 7.82  | 7.73  | 5.72  | 7.41  | 0     |
| 39 | 6.73  | 7.86  | 2.92 | 1.34  | 7.04  | 8.34  | 6.29  | 8.21  | 7.86  |
| 40 | 6.77  | 7.65  | 1.1  | 3.68  | 7.16  | 9.79  | 8.66  | 10.21 | 7.54  |
| 41 | 6.97  | 7.69  | 0.31 | 2.89  | 6.91  | 10.05 | 8.96  | 10.62 | 7.96  |
| 42 | 4.41  | 9.62  | 2.41 | 5.22  | 8.24  | 8.6   | 8.37  | 8.24  | 8.7   |
| 43 | 7.82  | 8.82  | 1.06 | 1.06  | 8.33  | 9.68  | 7.82  | 9.02  | 8.2   |
| 44 | 7.96  | 8.82  | 0    | 0.91  | 8.5   | 8.13  | 6.03  | 8.18  | 2.65  |
| 45 | 7.79  | 8.13  | 0.87 | 3.19  | 8.73  | 11.01 | 9.36  | 11.3  | 10.41 |
| 46 | 7.6   | 8.57  | 0    | 2.92  | 8.05  | 9.5   | 8.45  | 9.51  | 9.47  |
| 47 | 7.93  | 9.95  | 2.11 | 3.62  | 9.27  | 11.85 | 10.02 | 11.8  | 10.36 |
| 48 | 7.91  | 8.9   | 1.3  | 5.38  | 8.39  | 10.21 | 9.51  | 11.02 | 9.61  |
| 49 | 7.9   | 8.04  | 0.71 | 2.29  | 7.83  | 7.26  | 7.1   | 8.4   | 5.29  |
| 50 | 7.75  | 8.8   | 0    | 5.15  | 8.68  | 11.03 | 10.39 | 11.25 | 10.17 |
| 51 | 8.32  | 7.94  | 1.5  | 1.91  | 8.02  | 11.63 | 9.43  | 10.92 | 9.39  |
| 52 | 8.85  | 6.74  | 0    | 2.07  | 8.76  | 13.17 | 10.62 | 12.49 | 10.13 |
| 53 | 8.71  | 7.76  | 3.04 | 3.74  | 9.06  | 13.14 | 10.56 | 12.51 | 10.01 |
| 54 |       |       |      |       |       |       |       |       |       |
| 55 |       |       |      |       |       |       |       |       |       |
| 56 |       |       |      |       |       |       |       |       |       |
| 57 |       |       |      |       |       |       |       |       |       |
| 58 |       |       |      |       |       |       |       |       |       |
| 59 |       |       |      |       |       |       |       |       |       |
| 60 |       |       |      |       |       |       |       |       |       |

<https://mc.manuscriptcentral.com/gut>

|    |       |       |      |       |       |       |       |       |       |
|----|-------|-------|------|-------|-------|-------|-------|-------|-------|
| 1  |       |       |      |       |       |       |       |       |       |
| 2  | 8.57  | 7.84  | 3.08 | 1.27  | 8.35  | 12.24 | 9.67  | 11.58 | 9.07  |
| 3  | 10.18 | 9.75  | 3.1  | 5.27  | 9.15  | 14.14 | 12.12 | 13.95 | 11.38 |
| 4  | 10.25 | 10.07 | 2.24 | 5.86  | 9.96  | 14.42 | 12.58 | 14.53 | 11.36 |
| 5  | 9.86  | 7.37  | 3.06 | 4.2   | 8.93  | 13.69 | 11.67 | 13.38 | 10.88 |
| 6  | 10.07 | 7.66  | 1.54 | 4.38  | 8.76  | 13.28 | 11.51 | 13.22 | 10.57 |
| 7  | 8.64  | 11.2  | 3.22 | 3.57  | 9.53  | 13.07 | 10.96 | 12.74 | 11.12 |
| 8  | 9.15  | 11.05 | 5.8  | 6.57  | 10.37 | 13.45 | 11.72 | 13.38 | 11.33 |
| 9  | 9.45  | 11.1  | 4.62 | 6.3   | 9.91  | 11.77 | 10.36 | 12.23 | 10.67 |
| 10 | 9.76  | 12.69 | 6.87 | 10.69 | 10.26 | 13.83 | 12.33 | 13.74 | 11.78 |
| 11 | 9.42  | 11.76 | 2.76 | 5.46  | 10.65 | 14.54 | 12.39 | 13.86 | 13.1  |
| 12 | 9.94  | 12.8  | 1.17 | 6.77  | 10.52 | 14.23 | 12.28 | 13.84 | 11.67 |
| 13 | 10    | 11.87 | 2.71 | 6.57  | 10.59 | 14.91 | 12.92 | 14.51 | 11.83 |
| 14 | 9.86  | 12.55 | 2.65 | 7.82  | 10.37 | 13.93 | 11.99 | 13.6  | 12.26 |
| 15 | 8.24  | 11.56 | 5.12 | 2.28  | 9.38  | 12.17 | 9.87  | 11.9  | 10.26 |
| 16 | 9.19  | 12.62 | 3.09 | 5     | 10.29 | 12.84 | 10.88 | 13.15 | 11.15 |
| 17 | 9.76  | 12.36 | 4.9  | 9.19  | 10.2  | 14.52 | 12.16 | 13.85 | 12.16 |
| 18 | 8.78  | 11.37 | 3.8  | 4.39  | 9.84  | 13.89 | 11.65 | 14    | 11.27 |
| 19 | 9.22  | 9.83  | 2.25 | 6.02  | 10.35 | 14.51 | 12.3  | 14.47 | 10.84 |
| 20 | 10.31 | 11.15 | 3.33 | 9.76  | 10.76 | 15    | 12.88 | 14.84 | 11.59 |
| 21 | 8.91  | 10.16 | 3.93 | 4.25  | 8.9   | 12.37 | 10.39 | 12.02 | 10.44 |
| 22 | 9.64  | 7.02  | 0.54 | 5.1   | 10.16 | 14.92 | 12.82 | 14.7  | 11.46 |
| 23 | 8.43  | 6.15  | 0    | 4.34  | 9.34  | 13.07 | 11.07 | 13.02 | 10.72 |
| 24 | 8.94  | 9.57  | 2.11 | 5.35  | 9.72  | 12.36 | 10.95 | 12.81 | 10.81 |
| 25 | 8.89  | 8.94  | 0.93 | 6.18  | 9.82  | 12.91 | 11.64 | 13.17 | 10.95 |
| 26 | 9.19  | 12.54 | 4.74 | 11.03 | 9.56  | 14.7  | 13.46 | 14.04 | 13.01 |
| 27 | 7.75  | 10.72 | 0.36 | 1.95  | 8.24  | 11.03 | 8.73  | 11.15 | 9.91  |
| 28 | 8.41  | 9.47  | 2.38 | 5.6   | 9.34  | 11.01 | 9.23  | 11.6  | 10.33 |
| 29 | 7.95  | 7.55  | 0    | 3.67  | 9.01  | 12.16 | 10.17 | 12.44 | 10.55 |
| 30 | 9.56  | 10.91 | 2.9  | 8.61  | 10.22 | 11.9  | 11.11 | 13.27 | 9.95  |
| 31 | 6.66  | 7.57  | 1.76 | 3.76  | 7.15  | 8.58  | 7.43  | 8.75  | 6.22  |
| 32 | 7.58  | 7.67  | 1.72 | 3.53  | 7.56  | 12.85 | 11.02 | 12.07 | 9.48  |
| 33 | 7.13  | 7.33  | 0.88 | 0.88  | 7.54  | 7.51  | 5.34  | 6.82  | 3.69  |
| 34 | 7.24  | 7.56  | 0.96 | 2.96  | 7.2   | 10    | 8.5   | 9.77  | 6.76  |
| 35 | 6.72  | 8.93  | 1.68 | 0.94  | 8.09  | 11.05 | 8.68  | 10.23 | 9.34  |
| 36 | 7.25  | 8.08  | 0.66 | 4.3   | 8.37  | 10.66 | 8.58  | 10.82 | 8.79  |
| 37 | 7.64  | 8.93  | 2.09 | 4.98  | 8.88  | 11.61 | 9.55  | 11.59 | 9.71  |
| 38 | 7.96  | 9.2   | 2.63 | 5.99  | 8.9   | 14.13 | 11.67 | 13.66 | 9.86  |
| 39 | 8.28  | 13.64 | 2.68 | 4.05  | 8.4   | 9.41  | 8.36  | 10.01 | 9.51  |
| 40 | 8.67  | 10.27 | 3.78 | 6.16  | 9.75  | 12.92 | 10.99 | 12.67 | 10.8  |
| 41 | 9.08  | 9.45  | 2    | 4.12  | 9.71  | 12.47 | 10.33 | 12.42 | 11.21 |
| 42 | 8.36  | 11.75 | 2.23 | 6.82  | 9.75  | 14.17 | 12.27 | 12.79 | 12.1  |
| 43 | 8.28  | 10.38 | 1.59 | 4.02  | 8.74  | 11.81 | 10.09 | 11.73 | 10.37 |
| 44 | 8.21  | 11.59 | 4.51 | 9.68  | 9.21  | 15.62 | 13.01 | 13.76 | 12.52 |
| 45 | 9.43  | 9.61  | 0.87 | 6.21  | 10.57 | 14.3  | 12.3  | 14.18 | 11.07 |
| 46 | 9.92  | 9.96  | 0.94 | 8.28  | 10.22 | 15.45 | 13.38 | 14.93 | 11.05 |
| 47 | 8.61  | 10.7  | 0.68 | 1.68  | 8.33  | 9.6   | 8.3   | 8.8   | 10.22 |
| 48 | 9.08  | 10.96 | 0.98 | 8.45  | 8.94  | 12.9  | 10.91 | 12.82 | 11.08 |
| 49 | 9.25  | 10.81 | 2.6  | 8.11  | 9.21  | 12.73 | 10.76 | 12.63 | 10.92 |
| 50 | 9.25  | 10.46 | 3.72 | 8.25  | 9.2   | 12.33 | 10.22 | 12.34 | 10.46 |
| 51 | 8.16  | 8.35  | 1.16 | 3.27  | 9.24  | 13.27 | 11.31 | 13.07 | 11.46 |
| 52 | 9.09  | 8.49  | 0.53 | 6.26  | 9.24  | 11.89 | 10.15 | 12.52 | 9.72  |
| 53 | 8.61  | 8.31  | 0.83 | 5.64  | 9.04  | 11.55 | 10.04 | 12.31 | 9.31  |

<https://mc.manuscriptcentral.com/gut>

|      |       |      |      |       |       |       |       |       |
|------|-------|------|------|-------|-------|-------|-------|-------|
| 9.68 | 10.88 | 0.79 | 9.6  | 8.58  | 12.55 | 10.95 | 12.66 | 10.85 |
| 8.21 | 8.46  | 1.1  | 4.8  | 9.92  | 14.44 | 12.5  | 14.02 | 12.29 |
| 8.05 | 7.62  | 0.59 | 3.76 | 10.05 | 12.3  | 10.85 | 13.02 | 10.82 |
| 7.91 | 8.45  | 0.49 | 4.19 | 10.12 | 12.92 | 11.24 | 13.19 | 10.76 |
| 6.6  | 9.11  | 2.55 | 6.84 | 8.42  | 12.94 | 11.03 | 11.28 | 10.32 |
| 8.08 | 8.6   | 2.15 | 4.32 | 8.67  | 12.44 | 10.54 | 12.4  | 10.53 |
| 6.28 | 7.52  | 1.07 | 3.32 | 7.61  | 10.68 | 8.65  | 10.34 | 9.26  |
| 6.01 | 7.34  | 0.94 | 2.94 | 7.51  | 10.61 | 8.44  | 10.08 | 9.34  |
| 6.48 | 7.9   | 0.27 | 0.27 | 7.79  | 6.96  | 5.23  | 7.81  | 1.86  |
| 7.94 | 9.3   | 0.55 | 5.87 | 8.88  | 12.32 | 10.21 | 12.47 | 9.27  |
| 8.69 | 11.55 | 1.24 | 1.65 | 8.84  | 12.88 | 11.14 | 13    | 10.73 |
| 9.26 | 10.3  | 2.89 | 7.52 | 8.99  | 12.34 | 10.69 | 13.11 | 10.29 |
| 9.53 | 11.11 | 4.21 | 8.45 | 9.33  | 12.67 | 11.11 | 13.45 | 10.58 |
| 9.33 | 11.04 | 3.93 | 6.23 | 8.91  | 14.39 | 12.47 | 14.6  | 10.45 |
| 7.63 | 14.18 | 4.13 | 8.22 | 8.57  | 15.36 | 13.1  | 13.03 | 13.08 |
| 8.28 | 11.76 | 2.61 | 4.61 | 8.13  | 11.6  | 9.57  | 11.57 | 9.41  |
| 8.36 | 11.82 | 3.32 | 4.82 | 8.43  | 10.85 | 8.91  | 11.06 | 8.92  |
| 8.13 | 11.89 | 2.56 | 4.71 | 8.09  | 11.83 | 9.77  | 11.68 | 9.62  |



1  
2  
3  
4  
5  
6  
7  
8  
9  
10  
11  
12  
13  
14  
15  
16  
17  
18  
19  
20  
21  
22  
23  
24  
25  
26  
27  
28  
29  
30  
31  
32  
33  
34  
35  
36  
37  
38  
39  
40  
41  
42  
43  
44  
45  
46  
47  
48  
49  
50  
51  
52  
53  
54  
55  
56  
57  
58  
59  
60

| COL4A2 | COL4A6 | COL5A1 | COL5A2 | COL6A1 | COL6A2 | COL6A3 | COL7A1 | COMP |
|--------|--------|--------|--------|--------|--------|--------|--------|------|
| 9.46   | 1.56   | 9.52   | 8.68   | 8.47   | 9.74   | 9.51   | 6.89   | 8.39 |
| 10.9   | 4.3    | 9.64   | 9.46   | 9.19   | 10.31  | 10.37  | 8.5    | 7.36 |
| 10.48  | 4.67   | 9.3    | 9.43   | 8.99   | 10.01  | 10.33  | 9.21   | 7.39 |
| 11.88  | 4.88   | 9.97   | 10.12  | 9.51   | 11.23  | 11.7   | 9.59   | 8.09 |
| 9.23   | 2.59   | 8.89   | 9.03   | 7.68   | 7.01   | 8.44   | 8.21   | 8.56 |
| 9.64   | 2.81   | 10.05  | 9.83   | 9.18   | 10.23  | 10.38  | 8.18   | 6.91 |
| 10.17  | 0.92   | 10.18  | 9.89   | 9.36   | 10.41  | 10.36  | 8.78   | 6.8  |
| 11.89  | 3.39   | 10.19  | 10.35  | 8.78   | 10.82  | 11.81  | 9.31   | 5.75 |
| 11.73  | 1.95   | 10.44  | 10.15  | 7.98   | 10.08  | 11.03  | 5.5    | 7.26 |
| 8.88   | 1.49   | 9.72   | 9.65   | 8.06   | 9.67   | 10.35  | 7.95   | 6.92 |
| 9.78   | 4.96   | 10     | 9.66   | 8.79   | 10.3   | 10.7   | 7.99   | 5.59 |
| 10.47  | 4.27   | 10.58  | 10.54  | 9.72   | 11.28  | 11.43  | 8.59   | 6.89 |
| 8.91   | 3.09   | 9.74   | 9.32   | 9.42   | 10.17  | 10.33  | 7.78   | 7.13 |
| 9.99   | 3.13   | 11.19  | 10.51  | 10.73  | 11.46  | 11.28  | 9.25   | 7.48 |
| 12.03  | 2.77   | 9.09   | 10.12  | 8.02   | 10.79  | 12.53  | 6.81   | 9.6  |
| 10.41  | 1.94   | 10.67  | 10.16  | 8.77   | 10.58  | 11.04  | 8.73   | 7.79 |
| 9.37   | 4.61   | 10.78  | 10.65  | 9.63   | 10.84  | 11.38  | 9.53   | 7.68 |
| 10.33  | 5.22   | 11.05  | 11.09  | 9.77   | 11.48  | 12.02  | 9.22   | 8.52 |
| 11.84  | 0      | 9.22   | 9.58   | 8.89   | 10.86  | 11.66  | 6.05   | 5.8  |
| 10.79  | 4.31   | 10.12  | 9.8    | 9.67   | 11.08  | 11.11  | 7.62   | 5.26 |
| 11.23  | 4.89   | 9.68   | 9.41   | 9.8    | 11.41  | 11.54  | 6.69   | 5.71 |
| 11.54  | 5.36   | 11.42  | 10.73  | 10.69  | 11.9   | 11.91  | 10.25  | 7.02 |
| 11.18  | 5.98   | 10.94  | 10.23  | 10.31  | 11.4   | 11.35  | 10.57  | 4.52 |
| 11.11  | 4.59   | 11.42  | 10.5   | 10.56  | 11.88  | 11.72  | 9.47   | 7.25 |
| 10.29  | 4.75   | 8.39   | 7.49   | 9.3    | 10.16  | 9      | 7.44   | 6.07 |
| 9.93   | 4.3    | 9.13   | 8.72   | 9.19   | 9.48   | 8.96   | 7.39   | 1.13 |
| 9.72   | 4.22   | 9.35   | 8.84   | 9.37   | 9.65   | 9.17   | 7.19   | 4.22 |
| 9.39   | 4.77   | 9.16   | 8.82   | 9.1    | 9.69   | 9.05   | 7.4    | 6.75 |
| 9.75   | 0      | 8.99   | 8.23   | 7.73   | 9.09   | 8.52   | 6.28   | 6.89 |
| 9.69   | 4.02   | 8.61   | 8.41   | 8.59   | 9.87   | 9.86   | 8.22   | 7.2  |
| 9.66   | 2.78   | 8.48   | 8.32   | 8.01   | 9.74   | 9.32   | 7.9    | 7.13 |
| 10.27  | 2.29   | 9.14   | 9.01   | 8.39   | 9.77   | 10.3   | 7.13   | 7.85 |
| 7.69   | 1.35   | 7.93   | 7.61   | 8.1    | 9.01   | 8.47   | 7.52   | 7.58 |
| 11.42  | 2.38   | 11.51  | 10.76  | 10.36  | 11.81  | 12.15  | 9.15   | 7.76 |
| 11.23  | 3.93   | 10.93  | 10.17  | 10.23  | 11.21  | 11.43  | 9.6    | 6.59 |
| 11.54  | 4.38   | 10.81  | 10.45  | 9.74   | 11.4   | 12.02  | 7.83   | 7.94 |
| 10.46  | 0.45   | 8.02   | 8.13   | 7.24   | 9.33   | 10.12  | 5.2    | 3.45 |
| 9.27   | 2.4    | 9.49   | 9.63   | 9.07   | 10.2   | 10.63  | 9.38   | 2.4  |
| 9.72   | 2.37   | 9.53   | 9.76   | 9.42   | 10.75  | 11.3   | 8.79   | 4.27 |
| 8.98   | 2.91   | 9.2    | 9.24   | 9.24   | 10.52  | 11.04  | 6.28   | 4.27 |
| 9.72   | 1.1    | 9.52   | 9.21   | 7.8    | 9.48   | 9.63   | 7.4    | 7.65 |
| 8.46   | 1.48   | 9.84   | 9.42   | 8.23   | 9.8    | 10.18  | 8.32   | 7.14 |
| 8.27   | 1.22   | 9.33   | 9.02   | 7.83   | 9.39   | 9.92   | 8.08   | 7.06 |
| 8.65   | 0      | 9.79   | 9.44   | 8.37   | 9.69   | 10.23  | 8.07   | 6.6  |
| 11.75  | 3.86   | 7.03   | 7.67   | 5.67   | 8.86   | 10.24  | 9.34   | 5.18 |
| 9.6    | 4.31   | 9.41   | 8.73   | 8.73   | 10.24  | 9.78   | 7.22   | 5.02 |
| 10.37  | 3.46   | 10.22  | 9.94   | 9.29   | 10.74  | 10.79  | 8.26   | 5.32 |
| 10.42  | 4.85   | 11.12  | 10.79  | 10.32  | 11.83  | 11.73  | 8.42   | 6.56 |
| 10.99  | 2.22   | 10.16  | 10.09  | 8.83   | 10.65  | 10.73  | 6.52   | 9.82 |
| 10.83  | 3.47   | 11.24  | 11.08  | 9.86   | 11.26  | 11.07  | 9.84   | 7.32 |
| 10.12  | 2.5    | 10.24  | 10.06  | 9      | 10.27  | 10.74  | 8.65   | 5.7  |

<https://mc.manuscriptcentral.com/gut>

|    |       |      |       |       |       |       |       |       |       |
|----|-------|------|-------|-------|-------|-------|-------|-------|-------|
| 1  |       |      |       |       |       |       |       |       |       |
| 2  | 10.52 | 3.4  | 11.44 | 11.23 | 9.88  | 11.31 | 11.18 | 7.86  | 7.04  |
| 3  | 10.02 | 2.35 | 9.07  | 8.37  | 8.01  | 9.58  | 9.06  | 6.81  | 7.35  |
| 4  | 10.31 | 2.51 | 9.76  | 9.55  | 8.83  | 10.23 | 9.94  | 9.42  | 7.22  |
| 5  | 9.94  | 1.95 | 9.62  | 9.6   | 8.32  | 9.84  | 10.03 | 9.09  | 7.03  |
| 6  | 9.45  | 4.29 | 9.63  | 9.13  | 8.83  | 10.28 | 9.89  | 7.08  | 7.23  |
| 7  | 10.65 | 2.23 | 9.45  | 8.82  | 8.94  | 10.42 | 10.09 | 6.71  | 5.32  |
| 8  | 10.81 | 4.5  | 10.1  | 9.67  | 9.36  | 10.54 | 10.31 | 9.03  | 5.05  |
| 9  | 10.05 | 2.17 | 9.06  | 8.97  | 7.92  | 9.49  | 9.28  | 7.94  | 3.7   |
| 10 | 10.93 | 4.69 | 9.85  | 9.56  | 9.5   | 11.31 | 10.19 | 7.71  | 6.05  |
| 11 | 9.61  | 0.58 | 9.43  | 8.6   | 9.1   | 10.01 | 9.74  | 5.04  | 5.92  |
| 12 | 9.86  | 4.13 | 9.58  | 9.25  | 8.99  | 10    | 10.1  | 8.93  | 6.1   |
| 13 | 9.61  | 2.99 | 9.67  | 9.28  | 9.01  | 9.67  | 9.92  | 8.66  | 6.5   |
| 14 | 9.41  | 5.26 | 9.79  | 9.06  | 9.56  | 10.36 | 10.27 | 7.5   | 6.76  |
| 15 | 12.23 | 6.15 | 8.47  | 11.03 | 9.24  | 5.15  | 10.44 | 7.96  | 8.32  |
| 16 | 11.64 | 2.37 | 9.24  | 10.12 | 9.09  | 9.35  | 11.52 | 9.48  | 7.94  |
| 17 | 10.12 | 2.28 | 9.16  | 9.38  | 8.35  | 9.29  | 10.82 | 9.01  | 7.98  |
| 18 | 5.53  | 1.24 | 9.89  | 10.51 | 9.93  | 9.31  | 10.09 | 9.72  | 10.03 |
| 19 | 8.65  | 1.77 | 9.96  | 10.12 | 9.43  | 8.76  | 9.79  | 9.61  | 9.91  |
| 20 | 9.69  | 2.95 | 8.97  | 8.83  | 8.51  | 9.3   | 9.2   | 8.16  | 6.71  |
| 21 | 9.08  | 3.72 | 8.86  | 8.31  | 8.22  | 8.99  | 8.66  | 7.83  | 6.71  |
| 22 | 8.99  | 2.84 | 9.16  | 8.79  | 8.33  | 9.27  | 9.62  | 7.94  | 6.9   |
| 23 | 10.32 | 3.9  | 10.45 | 9.7   | 9.67  | 10.93 | 11.15 | 8.11  | 5.93  |
| 24 | 9.67  | 5.7  | 9.91  | 8.97  | 9.34  | 10.62 | 10.57 | 7.86  | 6.49  |
| 25 | 9.83  | 5.69 | 10.04 | 9.48  | 9.04  | 10.19 | 10.56 | 6.22  | 6.72  |
| 26 | 10.03 | 4.81 | 10.54 | 10.01 | 11.09 | 11.32 | 11.3  | 9.07  | 5.22  |
| 27 | 10.53 | 4.99 | 11.57 | 10.99 | 11.77 | 12.3  | 12.05 | 10.22 | 6.84  |
| 28 | 10.56 | 4.39 | 11.35 | 10.99 | 11.89 | 12.54 | 12.27 | 9.24  | 6.47  |
| 29 | 9.46  | 1.36 | 10.01 | 9.42  | 9.28  | 10.07 | 10.57 | 9.45  | 6.19  |
| 30 | 9.73  | 2.3  | 10.3  | 9.75  | 9.38  | 10.46 | 10.95 | 9.07  | 6.55  |
| 31 | 9.48  | 3.32 | 9.88  | 9.32  | 9.12  | 10.28 | 10.71 | 8.05  | 6.84  |
| 32 | 9.81  | 1.7  | 10.18 | 9.21  | 9.15  | 10.49 | 10.15 | 7.27  | 7.59  |
| 33 | 9.79  | 4.01 | 9.6   | 9.22  | 9.26  | 10.46 | 9.92  | 7.85  | 7.15  |
| 34 | 9.6   | 3.16 | 9.34  | 9.19  | 8.45  | 9.46  | 9.93  | 8.1   | 7.7   |
| 35 | 9.53  | 2.54 | 10.9  | 10.34 | 10.13 | 11.09 | 11.64 | 9.16  | 7.7   |
| 36 | 9.53  | 3.34 | 10.76 | 10.29 | 10.08 | 10.89 | 11.21 | 9.51  | 7.79  |
| 37 | 10.12 | 2.24 | 11.55 | 11.07 | 10.78 | 11.69 | 12.01 | 8.94  | 9.65  |
| 38 | 9.87  | 1.44 | 9.96  | 9.75  | 9.44  | 10.55 | 10.78 | 8.61  | 7.76  |
| 39 | 9.87  | 1.44 | 9.96  | 9.75  | 9.44  | 10.55 | 10.78 | 8.61  | 7.76  |
| 40 | 9.25  | 4.32 | 9.19  | 8.94  | 9.08  | 9.97  | 10.32 | 7.87  | 7.86  |
| 41 | 9.84  | 5.31 | 9.92  | 9.6   | 9.86  | 10.93 | 11.31 | 8.32  | 7.88  |
| 42 | 9.74  | 3.15 | 11.17 | 10.7  | 9.94  | 11.14 | 11.54 | 8.35  | 8.92  |
| 43 | 8.38  | 2.14 | 8.39  | 8.38  | 8.17  | 8.8   | 9.06  | 7.74  | 8.01  |
| 44 | 10.35 | 4.76 | 10.04 | 9.8   | 9.77  | 10.69 | 10.71 | 9.53  | 9.04  |
| 45 | 10.3  | 4.27 | 9.83  | 9.58  | 10.07 | 10.76 | 10.29 | 9.23  | 8.85  |
| 46 | 10.27 | 5.2  | 9.62  | 9.13  | 9.48  | 10.5  | 10.89 | 7.78  | 8.55  |
| 47 | 10.68 | 2.31 | 10.21 | 10.04 | 9.21  | 10.69 | 11.54 | 8.8   | 5.68  |
| 48 | 10.4  | 2.66 | 9.6   | 9.46  | 8.78  | 10.03 | 10.88 | 8.88  | 4.88  |
| 49 | 11.59 | 2.1  | 10.43 | 10.77 | 9.33  | 10.75 | 12.3  | 8.36  | 5.91  |
| 50 | 8.63  | 0.15 | 9.14  | 8.56  | 8.71  | 9.47  | 9.72  | 7.17  | 7.07  |
| 51 | 10.14 | 3.92 | 10.69 | 10.17 | 9.8   | 11.26 | 11.94 | 8.06  | 7.69  |
| 52 | 10.14 | 4.04 | 10.25 | 9.69  | 9.53  | 10.98 | 11.33 | 7.51  | 7.07  |
| 53 | 9.4   | 3.2  | 9.45  | 9.53  | 8.33  | 9.37  | 10.42 | 8.2   | 6.95  |

<https://mc.manuscriptcentral.com/gut>

|    |       |      |       |       |       |       |       |       |       |
|----|-------|------|-------|-------|-------|-------|-------|-------|-------|
| 1  |       |      |       |       |       |       |       |       |       |
| 2  | 9.9   | 3.06 | 10.26 | 10.26 | 9.33  | 10.38 | 11.05 | 9.33  | 6.43  |
| 3  | 11.09 | 3.24 | 9.52  | 9.9   | 8.46  | 9.82  | 11.62 | 8.61  | 8.2   |
| 4  | 9.58  | 1.83 | 9.21  | 8.12  | 9.19  | 10.05 | 9.61  | 7.57  | 6.36  |
| 5  | 10.37 | 4.4  | 11.04 | 10.15 | 10.5  | 11.38 | 11.84 | 10.99 | 7.96  |
| 6  | 10.85 | 5.95 | 11.68 | 11.16 | 10.75 | 11.93 | 12.4  | 9.67  | 8.77  |
| 7  | 11.5  | 2.99 | 10.09 | 9.6   | 8.88  | 10.45 | 11.69 | 7.09  | 7.76  |
| 8  | 9.83  | 2.87 | 10.67 | 10    | 9.45  | 10.43 | 11.5  | 9.16  | 5.7   |
| 9  | 10.16 | 1.34 | 10.63 | 10.19 | 9.66  | 10.8  | 11.64 | 9.81  | 5.28  |
| 10 | 13.76 | 5.66 | 9.24  | 10.55 | 7.25  | 10.24 | 13.59 | 9.02  | 7.99  |
| 11 | 11.58 | 2.79 | 9.59  | 8.91  | 7.79  | 9.89  | 11.05 | 6.11  | 6.22  |
| 12 | 10.39 | 3.49 | 9.23  | 8.95  | 8.15  | 9.74  | 10.22 | 8.14  | 4.66  |
| 13 | 8.53  | 1.89 | 8.86  | 8.47  | 7.45  | 8.75  | 9.2   | 7.04  | 6.76  |
| 14 | 13.5  | 3.85 | 9.73  | 10.7  | 7.65  | 10.29 | 13.32 | 7.58  | 9.48  |
| 15 | 3.11  | 0.79 | 9.41  | 9.23  | 8.05  | 7.86  | 9.61  | 8.71  | 9.2   |
| 16 | 10.1  | 0.95 | 10.29 | 10.02 | 8.96  | 10.29 | 10.94 | 9.24  | 5.41  |
| 17 | 10.02 | 2.64 | 10.1  | 9.57  | 8.77  | 9.98  | 10.55 | 8.64  | 4.36  |
| 18 | 9.83  | 3.43 | 9.86  | 9.45  | 8.59  | 10.08 | 10.45 | 6.88  | 5.59  |
| 19 | 9.53  | 3.34 | 10.48 | 10.3  | 10.06 | 11.25 | 11.04 | 8.11  | 4.56  |
| 20 | 8.88  | 1.77 | 10.33 | 10.17 | 9.45  | 10.89 | 11.07 | 8.12  | 7.07  |
| 21 | 9.61  | 2.72 | 10.42 | 10.24 | 9.65  | 11.03 | 11.06 | 7.28  | 7.23  |
| 22 | 15.94 | 5.16 | 7.49  | 7.75  | 7.16  | 6.16  | 12.2  | 6.75  | 9.56  |
| 23 | 9.95  | 3.22 | 9.32  | 8.8   | 8.65  | 9.49  | 9.65  | 8.19  | 3.38  |
| 24 | 9.91  | 3.54 | 9.79  | 9.04  | 9.44  | 10.35 | 10.85 | 8.12  | 5.54  |
| 25 | 11.35 | 3.77 | 9.42  | 9.53  | 8.24  | 10.21 | 11.14 | 8.84  | 12.17 |
| 26 | 12.5  | 5.3  | 9.9   | 9.82  | 8.7   | 10.64 | 12.35 | 8.69  | 11.6  |
| 27 | 11.99 | 3.54 | 11.61 | 11.35 | 9.92  | 11.58 | 12.07 | 7.05  | 11.11 |
| 28 | 7.88  | 2    | 8.18  | 8.36  | 7.37  | 7.37  | 8.83  | 8.21  | 8.59  |
| 29 | 0.86  | 2.44 | 8.17  | 7.97  | 7.57  | 6.92  | 8.42  | 8.01  | 8.57  |
| 30 | 4.09  | 1.77 | 8.19  | 8.07  | 7.16  | 7.16  | 8.44  | 7.44  | 8.35  |
| 31 | 10.12 | 0.01 | 10.72 | 9.21  | 9.18  | 10.35 | 10.74 | 6.61  | 6.5   |
| 32 | 10.29 | 4.91 | 11.23 | 10.31 | 10.1  | 11.74 | 12.17 | 8.96  | 7.79  |
| 33 | 10.47 | 4.5  | 10    | 9     | 9.21  | 10.54 | 11.39 | 7.46  | 7.36  |
| 34 | 10.27 | 2.48 | 11.2  | 10.19 | 10.22 | 11.47 | 11.62 | 5.16  | 7.57  |
| 35 | 7.85  | 0.45 | 7.61  | 7.85  | 6.93  | 7.09  | 8.29  | 7.54  | 7.89  |
| 36 | 6.91  | 0.25 | 7.38  | 7.43  | 6.21  | 6.44  | 7.59  | 6.4   | 6.68  |
| 37 | 7.14  | 0    | 7.12  | 7.33  | 6.19  | 6.61  | 8.05  | 6.67  | 6.81  |
| 38 | 0     | 0    | 8.27  | 8.72  | 8.1   | 7.27  | 8.31  | 7.72  | 7.88  |
| 39 | 6.19  | 1.34 | 7.6   | 7.6   | 7.09  | 6.19  | 7.73  | 7.27  | 7.42  |
| 40 | 6.14  | 1.1  | 7.44  | 7.54  | 6.56  | 6.35  | 8.11  | 6.9   | 7.12  |
| 41 | 6.44  | 0.31 | 7.1   | 7.47  | 7     | 6.7   | 8.55  | 7.19  | 6.8   |
| 42 | 6.41  | 2.41 | 9.31  | 10.57 | 10.75 | 8.34  | 9.42  | 8.37  | 7.05  |
| 43 | 6.7   | 3.06 | 8.43  | 8.58  | 7.41  | 7.26  | 8.52  | 8.35  | 8.59  |
| 44 | 1.65  | 0.91 | 8.62  | 8.55  | 7.98  | 7.14  | 8.58  | 8.41  | 8.75  |
| 45 | 8.71  | 0.87 | 7.81  | 8.29  | 6.84  | 7.75  | 8.68  | 7.81  | 7.71  |
| 46 | 7.4   | 1.33 | 8.28  | 8.33  | 7.72  | 7.18  | 8.33  | 7.95  | 8.31  |
| 47 | 9.3   | 0.3  | 8.37  | 8.44  | 7.8   | 9.03  | 9.49  | 7.7   | 8.03  |
| 48 | 8.13  | 1.88 | 8.41  | 8.75  | 7.73  | 7.53  | 8.96  | 7.56  | 8.69  |
| 49 | 3.29  | 1.71 | 8.21  | 8.56  | 7.71  | 6.9   | 8.35  | 7.08  | 8.16  |
| 50 | 8.3   | 1.48 | 9.01  | 9.43  | 8.77  | 8.26  | 8.97  | 8.22  | 8.83  |
| 51 | 8.42  | 1.5  | 9.02  | 8.43  | 7.73  | 8.75  | 9.09  | 6     | 6.23  |
| 52 | 8.91  | 1.74 | 9.97  | 9.26  | 8.58  | 9.61  | 9.82  | 7.51  | 6.69  |
| 53 | 8.87  | 1.62 | 9.82  | 9.2   | 9.12  | 9.77  | 9.98  | 7.88  | 7.06  |

<https://mc.manuscriptcentral.com/gut>

1  
2  
3  
4  
5  
6  
7  
8  
9  
10  
11  
12  
13  
14  
15  
16  
17  
18  
19  
20  
21  
22  
23  
24  
25  
26  
27  
28  
29  
30  
31  
32  
33  
34  
35  
36  
37  
38  
39  
40  
41  
42  
43  
44  
45  
46  
47  
48  
49  
50  
51  
52  
53  
54  
55  
56  
57  
58  
59  
60

|       |      |       |       |       |       |       |       |       |
|-------|------|-------|-------|-------|-------|-------|-------|-------|
| 8.08  | 2.27 | 9.46  | 8.75  | 8.33  | 9.38  | 9.14  | 6.36  | 7.45  |
| 10.4  | 0.52 | 11.02 | 10.54 | 9.39  | 10.61 | 10.49 | 7.6   | 9.42  |
| 10.3  | 4.11 | 11.45 | 10.77 | 10.57 | 11.6  | 11.24 | 9.54  | 7.9   |
| 9.6   | 2.33 | 10.48 | 10.11 | 9.11  | 10.13 | 10.24 | 7.85  | 7.7   |
| 9.38  | 0.95 | 10.29 | 9.8   | 8.93  | 9.93  | 9.93  | 7.96  | 7.61  |
| 10.32 | 1.35 | 10.11 | 9.47  | 8.92  | 10.17 | 10.32 | 10.49 | 8.36  |
| 10.52 | 4.16 | 9.72  | 9.59  | 9.12  | 10.67 | 11.5  | 9.33  | 8.33  |
| 9.83  | 2.98 | 9.25  | 8.93  | 9.03  | 10.3  | 10.59 | 8.98  | 6.93  |
| 11.66 | 7.06 | 9.72  | 9.54  | 10.06 | 11.83 | 12.57 | 8.06  | 7.99  |
| 12.12 | 0.76 | 11.3  | 10.63 | 9.77  | 11.21 | 11.34 | 6.62  | 8.17  |
| 10.83 | 4.07 | 11.1  | 10.67 | 10.4  | 11.27 | 11.28 | 8.38  | 8.02  |
| 10.98 | 3.55 | 11.56 | 11.26 | 10.42 | 11.53 | 11.69 | 10.47 | 8.01  |
| 11.29 | 4.71 | 10.77 | 10.44 | 10.37 | 11.31 | 10.88 | 7.1   | 7.72  |
| 9.73  | 0    | 9.23  | 7.92  | 8.31  | 9.43  | 9.37  | 8.49  | 6.61  |
| 10.39 | 3.9  | 9.8   | 9.32  | 9.06  | 10.31 | 10.5  | 9.14  | 4.42  |
| 12.09 | 6.05 | 9.89  | 9.59  | 9.35  | 11.15 | 12.06 | 8.28  | 6.85  |
| 10.5  | 1.58 | 10.32 | 9.57  | 9.72  | 10.98 | 11.2  | 5.93  | 5.97  |
| 10.08 | 4.67 | 11.13 | 10.76 | 10.02 | 11.3  | 11.69 | 9.26  | 7.14  |
| 11.16 | 4.98 | 11.52 | 11.17 | 10.42 | 11.98 | 12.36 | 8.57  | 6.5   |
| 9.36  | 1.51 | 9.31  | 8.48  | 8.48  | 9.93  | 9.91  | 5.57  | 7.37  |
| 10.06 | 2.54 | 11.54 | 11.06 | 10.34 | 11.42 | 11.95 | 10.81 | 5.48  |
| 9.33  | 2.29 | 9.77  | 9.46  | 8.63  | 9.73  | 10.37 | 8.74  | 4.65  |
| 10.19 | 4.57 | 10.06 | 9.71  | 9.96  | 10.37 | 10.77 | 8.34  | 7.89  |
| 10.02 | 3.74 | 10.53 | 9.85  | 10.74 | 10.57 | 10.81 | 8.62  | 8.13  |
| 13.31 | 6.61 | 8.61  | 10.26 | 9.44  | 11.3  | 12.44 | 8.88  | 10.38 |
| 9.01  | 0.36 | 7.8   | 6.98  | 8.34  | 9.34  | 9.28  | 6.49  | 7.12  |
| 9.31  | 3.96 | 9.12  | 8.37  | 9.17  | 9.92  | 9.88  | 7.3   | 7.91  |
| 9.37  | 2.93 | 9.82  | 8.93  | 9.24  | 9.73  | 9.91  | 8.07  | 8.74  |
| 10.54 | 6.65 | 10.16 | 8.57  | 10.2  | 11.59 | 9.48  | 7.48  | 8.59  |
| 4.57  | 1.76 | 7.46  | 7.08  | 6.51  | 5.57  | 6.66  | 7.22  | 7.64  |
| 8.48  | 3.04 | 7.65  | 7.72  | 6.89  | 7.91  | 9.53  | 9.11  | 7.32  |
| 1.88  | 2.47 | 7.44  | 7.05  | 7.07  | 6.01  | 7.03  | 7.47  | 7.82  |
| 5.35  | 2.54 | 7.4   | 7.3   | 6.98  | 5.91  | 7.53  | 7.17  | 7.61  |
| 8.41  | 0.36 | 7.99  | 6.94  | 7.07  | 7.66  | 8.27  | 6.06  | 6.11  |
| 8.34  | 0.66 | 7.88  | 7.68  | 7.2   | 8.62  | 8.73  | 7.43  | 6.85  |
| 8.91  | 2.09 | 8.44  | 8.27  | 7.94  | 9.3   | 9.33  | 7.7   | 6.82  |
| 9.1   | 3.87 | 10.03 | 9.67  | 8.87  | 10.06 | 10.15 | 7.09  | 6.78  |
| 8.76  | 1.94 | 6.4   | 6.08  | 7.57  | 9.48  | 8.51  | 6.03  | 3.81  |
| 10.18 | 3.78 | 9.61  | 9.39  | 8.44  | 10.51 | 10.48 | 9.38  | 6.92  |
| 10.67 | 4    | 8.76  | 9.05  | 8.53  | 9.92  | 10.67 | 8.28  | 3.59  |
| 12.66 | 2.23 | 7.72  | 9.03  | 6.4   | 9.36  | 12.25 | 7.79  | 5.55  |
| 9.54  | 0.18 | 9.11  | 8.36  | 7.63  | 9.55  | 9.17  | 7.03  | 7.38  |
| 13.48 | 5.51 | 8.6   | 9.51  | 8.21  | 9.68  | 13.21 | 8.76  | 6.51  |
| 10.09 | 3.57 | 10.77 | 10.28 | 9.74  | 11.36 | 11.77 | 8.6   | 7     |
| 10.34 | 5.26 | 11.61 | 11.24 | 10    | 11.83 | 12.15 | 8.58  | 8.63  |
| 10.13 | 0.68 | 5.59  | 6.21  | 6     | 7.64  | 6.11  | 11.23 | 4     |
| 10.83 | 3.68 | 9.36  | 9.26  | 9.07  | 10.59 | 10.76 | 9.66  | 6.88  |
| 10.74 | 4.52 | 9.17  | 8.83  | 9.03  | 10.52 | 10.6  | 9.64  | 4.98  |
| 10.17 | 3.72 | 9.22  | 8.86  | 9.24  | 10.52 | 10.4  | 8.61  | 6.58  |
| 10.68 | 0    | 10.5  | 9.08  | 8.55  | 10.08 | 10.35 | 5.76  | 5.19  |
| 9.08  | 3.34 | 9.38  | 9     | 8.38  | 9.91  | 10.46 | 7.52  | 8.58  |
| 8.59  | 2.64 | 8.92  | 8.45  | 7.86  | 9.4   | 10.28 | 6.99  | 8.6   |

<https://mc.manuscriptcentral.com/gut>

1  
2  
3  
4  
5  
6  
7  
8  
9  
10  
11  
12  
13  
14  
15  
16  
17  
18  
19  
20  
21  
22  
23  
24  
25  
26  
27  
28  
29  
30  
31  
32  
33  
34  
35  
36  
37  
38  
39  
40  
41  
42  
43  
44  
45  
46  
47  
48  
49  
50  
51  
52  
53  
54  
55  
56  
57  
58  
59  
60

|       |      |       |       |      |       |       |      |       |
|-------|------|-------|-------|------|-------|-------|------|-------|
| 10.98 | 6.04 | 8.83  | 8.4   | 8.61 | 10.76 | 10.79 | 5.49 | 6.81  |
| 11.36 | 2.1  | 10.61 | 9.62  | 8.62 | 10.81 | 10.19 | 7.56 | 9.13  |
| 9.71  | 1.59 | 10.09 | 9.26  | 9.6  | 10.25 | 9.88  | 9.06 | 10.77 |
| 9.57  | 2.07 | 10.46 | 9.65  | 9.9  | 10.34 | 10.19 | 9.15 | 11.11 |
| 10.8  | 3.14 | 7.53  | 8.11  | 7.05 | 7.78  | 10.31 | 8.24 | 10.51 |
| 9.33  | 1.89 | 9.46  | 8.96  | 8.35 | 9.92  | 9.89  | 5.12 | 8.05  |
| 8.11  | 1.07 | 7.45  | 7.07  | 6.68 | 8.12  | 8.38  | 4.82 | 4.15  |
| 8.14  | 1.94 | 7.12  | 6.94  | 6.6  | 7.94  | 8.3   | 4.91 | 4.21  |
| 2.59  | 1.27 | 7.75  | 8.07  | 6.93 | 6.63  | 8.34  | 7.38 | 8.04  |
| 8.56  | 2.13 | 8.67  | 8.55  | 8.11 | 9.48  | 10.07 | 8.25 | 7.14  |
| 10.22 | 0.65 | 9.96  | 9.1   | 8.52 | 10.1  | 10.4  | 6.06 | 5.14  |
| 9.83  | 2.47 | 10    | 9.6   | 9.12 | 10.45 | 10.68 | 7.4  | 7.19  |
| 10.36 | 3.11 | 9.84  | 9.53  | 9.22 | 10.83 | 10.92 | 6.79 | 6     |
| 9.65  | 1.13 | 11.49 | 10.76 | 9.86 | 11.31 | 11.24 | 6.28 | 8.54  |
| 13.53 | 4.54 | 6     | 8.79  | 5.13 | 8.07  | 11.75 | 6    | 6.94  |
| 8.76  | 0    | 7.66  | 7.95  | 8.13 | 9.42  | 10.2  | 7    | 4.84  |
| 8.31  | 2.4  | 8.22  | 8.09  | 8.4  | 9.31  | 9.45  | 7.18 | 6.03  |
| 9.11  | 1.75 | 7.61  | 7.94  | 8.1  | 9.37  | 10.46 | 6.9  | 4.96  |

1  
2  
3  
4  
5  
6  
7  
8  
9  
10  
11  
12  
13  
14  
15  
16  
17  
18  
19  
20  
21  
22  
23  
24  
25  
26  
27  
28  
29  
30  
31  
32  
33  
34  
35  
36  
37  
38  
39  
40  
41  
42  
43  
44  
45  
46  
47  
48  
49  
50  
51  
52  
53  
54  
55  
56  
57  
58  
59  
60

| CREBBP | CRIP2 | CRISPLD2 | CSF2RB | CSPG4 | CST7  | CTNNB1 | CTNND1 | CTSG |
|--------|-------|----------|--------|-------|-------|--------|--------|------|
| 7.49   | 7.51  | 7.5      | 7.28   | 6.33  | 7.27  | 9.74   | 8.98   | 6.55 |
| 7.66   | 9.36  | 8.93     | 6.28   | 8.42  | 6.85  | 11.14  | 10.24  | 6.31 |
| 7.43   | 9.32  | 8.54     | 6.62   | 7.72  | 7.05  | 10.68  | 10.17  | 6.85 |
| 7.98   | 10.83 | 9.68     | 5.67   | 8.65  | 6.81  | 11.51  | 10.84  | 7.11 |
| 6.44   | 7.03  | 7.79     | 7.71   | 7.75  | 8.36  | 8.61   | 8.54   | 7.62 |
| 7.83   | 8.9   | 8.11     | 6.55   | 7.08  | 7.4   | 11.21  | 9.24   | 5.74 |
| 7.79   | 9.32  | 8.64     | 6.38   | 7.45  | 7.25  | 11.36  | 9.52   | 5.96 |
| 8.28   | 11.02 | 9.26     | 6.77   | 7.1   | 7.44  | 11.75  | 10.97  | 2.39 |
| 8.01   | 9.1   | 8.46     | 5.76   | 6.43  | 6.79  | 10.82  | 10.97  | 3.17 |
| 8.05   | 7.52  | 7.68     | 5.77   | 5.55  | 5.98  | 10.92  | 9.95   | 5.61 |
| 8.27   | 8.44  | 8.29     | 5.42   | 6.74  | 5.47  | 11.09  | 10.61  | 3.38 |
| 8.53   | 9.32  | 9.46     | 6      | 7.92  | 6.07  | 11.34  | 10.42  | 6.27 |
| 8.02   | 10.02 | 7.72     | 6.44   | 6.12  | 7.12  | 12.17  | 10.13  | 5.97 |
| 8.03   | 10.07 | 8.13     | 7.27   | 6.86  | 7.86  | 11.74  | 9.91   | 6.24 |
| 8.03   | 12.3  | 9.51     | 6.63   | 7.65  | 10.98 | 11.14  | 11.39  | 5.77 |
| 7.32   | 8.7   | 8.88     | 7.35   | 6.5   | 7.34  | 11.44  | 9.97   | 6.62 |
| 8.31   | 9.24  | 8.44     | 7.1    | 6.93  | 6.81  | 11.2   | 10.56  | 6.68 |
| 8.12   | 9.31  | 8.57     | 6.54   | 7.73  | 6.81  | 11.48  | 10.67  | 7.17 |
| 8.94   | 10.91 | 8.5      | 6.77   | 6.98  | 9.76  | 11.17  | 11.65  | 4.8  |
| 8.7    | 9.75  | 8.48     | 6.09   | 7.8   | 8.43  | 11.94  | 10.94  | 2.77 |
| 8.77   | 10.17 | 8.85     | 6.82   | 7.98  | 9.46  | 11.97  | 10.84  | 5.57 |
| 9.03   | 9.61  | 9.56     | 4.54   | 8.24  | 5.64  | 11.88  | 11.07  | 3.61 |
| 8.93   | 9.37  | 9.86     | 4.66   | 8.25  | 5.69  | 11.73  | 10.98  | 1.78 |
| 9.03   | 9.24  | 10.1     | 4.65   | 8.78  | 5.51  | 11.86  | 10.85  | 4.35 |
| 8.69   | 8.29  | 7.3      | 5.38   | 7.03  | 6.67  | 11.07  | 10.21  | 3.43 |
| 7.91   | 8.74  | 8.48     | 5.3    | 7.96  | 4.71  | 11.41  | 11.25  | 1.13 |
| 7.79   | 9.05  | 8.22     | 5.22   | 7.63  | 5.43  | 11.55  | 11.11  | 3.33 |
| 7.89   | 8.72  | 8.49     | 6.92   | 7.8   | 6.42  | 11.06  | 10.75  | 5.92 |
| 8.53   | 7.96  | 7.46     | 6.8    | 6.36  | 6.92  | 11.17  | 9.6    | 6.07 |
| 8.04   | 8.89  | 7.95     | 7.04   | 6.68  | 6.95  | 10.54  | 9.63   | 6.7  |
| 8.53   | 8.42  | 7.47     | 6.84   | 6.62  | 6.42  | 11.28  | 9.89   | 5.81 |
| 8.07   | 8.97  | 8.27     | 7.37   | 6.73  | 7.39  | 10.45  | 9.92   | 7.01 |
| 8.05   | 7.38  | 7.55     | 7.81   | 5.79  | 8.12  | 10.05  | 8.49   | 7.26 |
| 8.76   | 9.63  | 9.59     | 5.76   | 7.91  | 5.97  | 11.62  | 10.57  | 4.06 |
| 8.72   | 9.36  | 8.81     | 5.68   | 8.2   | 5.76  | 11.21  | 10.74  | 3.61 |
| 8.64   | 9.74  | 9.49     | 6.14   | 7.81  | 6.17  | 11.25  | 10.82  | 4.93 |
| 7.82   | 8.36  | 7.07     | 6.84   | 4.35  | 8.57  | 10.45  | 9.56   | 3.77 |
| 7.26   | 7.67  | 7.97     | 6.62   | 5.16  | 8.1   | 10.65  | 9.14   | 3.4  |
| 7.25   | 8.16  | 7.91     | 6.37   | 5.79  | 8.95  | 10.49  | 8.8    | 3.69 |
| 7.67   | 7.72  | 7.98     | 6.34   | 6.03  | 8.95  | 10.44  | 8.67   | 3.65 |
| 7.19   | 9.06  | 7.28     | 6.64   | 6.96  | 6.83  | 9.67   | 8.88   | 6.05 |
| 7.37   | 9.89  | 7.34     | 6.39   | 6.85  | 6.98  | 9.44   | 8.94   | 6.09 |
| 7.35   | 9.04  | 7.25     | 6.5    | 6.45  | 7     | 9.13   | 8.81   | 6    |
| 7.85   | 9.74  | 7.45     | 5.9    | 6.52  | 6.35  | 9.64   | 9.53   | 5.24 |
| 7.03   | 10.24 | 7.38     | 2.86   | 5.45  | 6.67  | 10.25  | 11.49  | 3.86 |
| 8.08   | 8.37  | 8.39     | 4.71   | 6.9   | 5.6   | 10.44  | 10.27  | 2.31 |
| 8.13   | 8.7   | 8.72     | 3.91   | 7.36  | 6.32  | 10.78  | 10.18  | 1    |
| 8.2    | 8.97  | 8.77     | 4.56   | 7.87  | 6.07  | 11.02  | 9.92   | 4.39 |
| 8.74   | 9.41  | 8.49     | 6.44   | 6.47  | 7.57  | 11.87  | 11.09  | 3.96 |
| 8.7    | 9.43  | 8.33     | 6.75   | 7.23  | 6.22  | 12.09  | 10.9   | 2.59 |
| 8.61   | 9.49  | 7.86     | 6.33   | 6.8   | 6.83  | 11.69  | 10.96  | 0.5  |

<https://mc.manuscriptcentral.com/gut>

|    |      |       |      |      |      |      |       |       |      |
|----|------|-------|------|------|------|------|-------|-------|------|
| 1  |      |       |      |      |      |      |       |       |      |
| 2  | 8.64 | 9.47  | 8.75 | 7.01 | 7.13 | 7.19 | 12.01 | 10.71 | 4.25 |
| 3  | 8.07 | 7.99  | 7.52 | 5.84 | 6.3  | 6.69 | 12.46 | 10.8  | 6.57 |
| 4  | 7.88 | 8.38  | 8.63 | 6.19 | 7.88 | 6.93 | 12.6  | 10.34 | 5.97 |
| 5  | 7.73 | 8.15  | 8.89 | 6.08 | 7.22 | 6.99 | 12.49 | 10.64 | 5.88 |
| 6  | 7.81 | 8.08  | 8.74 | 6.25 | 7.34 | 7.15 | 12.52 | 10.57 | 6.29 |
| 7  |      |       |      |      |      |      |       |       |      |
| 8  | 8.61 | 9.76  | 7.9  | 5.87 | 6.52 | 7.59 | 10.87 | 11.2  | 5.27 |
| 9  | 8.82 | 9.63  | 8.26 | 4.33 | 8.14 | 6.2  | 11.73 | 11.27 | 3.42 |
| 10 | 8.96 | 8.18  | 7.58 | 3.39 | 7.21 | 4.84 | 11.15 | 11.47 | 2.17 |
| 11 | 9.51 | 9.34  | 8.22 | 4.83 | 8.39 | 6.11 | 11.38 | 11.35 | 3.9  |
| 12 | 8.59 | 9.34  | 6.79 | 4.71 | 5.94 | 6.12 | 11.59 | 9.57  | 2.39 |
| 13 | 8.56 | 9.96  | 8.3  | 6    | 6.54 | 6.3  | 11.26 | 10.19 | 3.54 |
| 14 |      |       |      |      |      |      |       |       |      |
| 15 | 8.48 | 9.56  | 7.78 | 5.1  | 6.54 | 5.75 | 11.39 | 9.87  | 3.14 |
| 16 | 8.33 | 9.41  | 8.4  | 5.19 | 7.52 | 6.45 | 11.27 | 9.8   | 3.15 |
| 17 | 9.32 | 8.61  | 7.47 | 7.15 | 7.47 | 8.96 | 10.71 | 9.15  | 7.15 |
| 18 | 8.43 | 9.34  | 8.19 | 7.02 | 7.49 | 8.18 | 10.66 | 10.8  | 8.16 |
| 19 | 7.59 | 8.1   | 8.09 | 7.26 | 6.85 | 8.22 | 10.73 | 10.19 | 7.28 |
| 20 | 7.79 | 4.05  | 9.04 | 8.2  | 8.15 | 9.02 | 9.44  | 9.51  | 9.86 |
| 21 | 7.62 | 5.94  | 8.69 | 8.12 | 7.83 | 8.96 | 9.36  | 9.43  | 9.5  |
| 22 |      |       |      |      |      |      |       |       |      |
| 23 | 8.28 | 7.72  | 6.69 | 6.55 | 7.34 | 6.63 | 11.61 | 10.42 | 5.81 |
| 24 | 8.54 | 7.15  | 6.78 | 6.29 | 6.88 | 6.39 | 11.62 | 10.49 | 5.89 |
| 25 | 8.46 | 7.53  | 7.52 | 6.78 | 6.67 | 6.93 | 11.38 | 10.4  | 6.39 |
| 26 | 9.21 | 8.93  | 9.27 | 5.05 | 6.67 | 6.23 | 11.83 | 10.63 | 4.45 |
| 27 | 8.7  | 8.94  | 8.67 | 5.45 | 7.27 | 6.39 | 11.65 | 10.44 | 5.7  |
| 28 | 8.33 | 8.16  | 8.68 | 6.09 | 7.51 | 7.46 | 10.95 | 10.09 | 7.05 |
| 29 | 8.89 | 9.66  | 9.56 | 6.59 | 7.47 | 7.58 | 11.75 | 11.24 | 4.72 |
| 30 | 9.09 | 9.56  | 9.77 | 6.17 | 7.49 | 7.06 | 12.06 | 11.09 | 4.5  |
| 31 | 9.15 | 9.29  | 9.72 | 5.55 | 8.03 | 7.4  | 12.01 | 11.23 | 4.01 |
| 32 | 7.14 | 8.11  | 8.25 | 6.87 | 6.55 | 7.13 | 10.87 | 9.91  | 6.31 |
| 33 | 7.3  | 8.05  | 8.2  | 6.69 | 6.93 | 7    | 10.94 | 10.04 | 6.39 |
| 34 | 7.51 | 7.82  | 8.28 | 7.05 | 7    | 7.25 | 10.76 | 9.85  | 6.38 |
| 35 | 7.93 | 8.6   | 8.4  | 7.22 | 7.49 | 8.16 | 12.82 | 7.99  | 6.82 |
| 36 | 7.98 | 8.12  | 7.56 | 6.94 | 7.14 | 7.31 | 12.64 | 6.99  | 6.54 |
| 37 | 7.92 | 7.94  | 7.55 | 7.51 | 7.05 | 7.89 | 12.37 | 8.26  | 6.73 |
| 38 | 8    | 9.34  | 8.59 | 7.27 | 6.81 | 6.5  | 11.73 | 9.58  | 5.73 |
| 39 | 8.21 | 9.43  | 8.3  | 7.33 | 6.76 | 7    | 11.3  | 9.75  | 6.01 |
| 40 | 8.05 | 9.67  | 9.33 | 7.04 | 7.43 | 7.01 | 11.75 | 9.65  | 6.38 |
| 41 | 8.03 | 8.85  | 8.34 | 7.75 | 6.3  | 7.9  | 10.7  | 9.43  | 6.55 |
| 42 | 8.03 | 8.85  | 8.34 | 7.75 | 6.3  | 7.9  | 10.7  | 9.43  | 6.55 |
| 43 | 8.14 | 9.65  | 8.06 | 6.93 | 7.34 | 7.45 | 10.83 | 10.36 | 6.88 |
| 44 | 7.86 | 9.75  | 9.15 | 7.35 | 7.99 | 7.5  | 10.79 | 10.23 | 7.26 |
| 45 | 8.29 | 9.83  | 9.09 | 6.76 | 7.1  | 7.37 | 11.18 | 10.13 | 6.83 |
| 46 | 7.3  | 7.32  | 7.73 | 8.23 | 6.8  | 8.14 | 9.41  | 9.2   | 7.32 |
| 47 | 7.77 | 8.45  | 8.91 | 7.17 | 7.58 | 7.5  | 10.34 | 10.28 | 6.55 |
| 48 | 7.56 | 8.8   | 8.18 | 7.05 | 7.23 | 6.89 | 10.56 | 10.41 | 6.2  |
| 49 | 7.1  | 8.73  | 8.63 | 7.42 | 7.95 | 7.6  | 9.96  | 10.04 | 7.24 |
| 50 | 9.13 | 9.56  | 8.98 | 5.28 | 6.91 | 6.76 | 12.09 | 11.11 | 3.19 |
| 51 | 8.91 | 9.81  | 7.87 | 4.16 | 6.73 | 4.78 | 12.01 | 11.31 | 1.66 |
| 52 | 8.81 | 10.51 | 8.94 | 7.02 | 6.78 | 6.75 | 11.67 | 11.42 | 4.52 |
| 53 | 7.63 | 8.01  | 7.97 | 7.51 | 6.53 | 7.39 | 9.99  | 8.84  | 7.17 |
| 54 | 7.65 | 9.34  | 9.19 | 7.61 | 7.76 | 7.21 | 10.73 | 9.54  | 7.33 |
| 55 | 7.48 | 8.82  | 9.36 | 6.98 | 7.46 | 7.13 | 10.61 | 9.55  | 6.92 |
| 56 | 7.15 | 8.23  | 8.29 | 6.48 | 7.07 | 7.26 | 10.97 | 9.42  | 6.15 |

<https://mc.manuscriptcentral.com/gut>

1  
2  
3  
4  
5  
6  
7  
8  
9  
10  
11  
12  
13  
14  
15  
16  
17  
18  
19  
20  
21  
22  
23  
24  
25  
26  
27  
28  
29  
30  
31  
32  
33  
34  
35  
36  
37  
38  
39  
40  
41  
42  
43  
44  
45  
46  
47  
48  
49  
50  
51  
52  
53  
54  
55  
56  
57  
58  
59  
60

|      |       |       |      |      |      |       |       |      |
|------|-------|-------|------|------|------|-------|-------|------|
| 7.42 | 8.32  | 8.57  | 6.53 | 7.26 | 7.16 | 11.17 | 9.53  | 5.8  |
| 7.13 | 9.3   | 8.66  | 6.87 | 7.47 | 8.19 | 10.01 | 9.51  | 7.32 |
| 8.69 | 9.63  | 8.27  | 7.11 | 5.83 | 7.93 | 10.67 | 9.74  | 5.82 |
| 8.48 | 10.64 | 8.87  | 6.62 | 7.39 | 6.78 | 11.46 | 11.21 | 7.45 |
| 8.56 | 10.75 | 9.14  | 6.13 | 8.13 | 6.3  | 11.53 | 10.8  | 7.09 |
| 7.99 | 9.7   | 8.69  | 6.83 | 6.24 | 8.59 | 10.57 | 10.14 | 5.49 |
| 8.08 | 10.77 | 8.25  | 4.91 | 6.59 | 5.22 | 11.43 | 9.84  | 1.55 |
| 8.03 | 10.08 | 8.49  | 5.04 | 6.68 | 5.99 | 11.29 | 9.9   | 4.46 |
| 7.02 | 13.26 | 9.68  | 6.2  | 8.11 | 8.02 | 10.84 | 11.89 | 7.45 |
| 8.75 | 9.63  | 7.65  | 6.04 | 6.75 | 7.13 | 10.92 | 11    | 3.96 |
| 8.87 | 9.29  | 7.6   | 5.66 | 6.98 | 6.11 | 10.65 | 10.58 | 1.49 |
| 8.17 | 8.24  | 7     | 6.81 | 6.38 | 6.49 | 10.15 | 9.76  | 6.33 |
| 8.37 | 11.96 | 9.56  | 5.85 | 7.82 | 6.9  | 10.69 | 12.03 | 2.26 |
| 6.42 | 4.66  | 8.62  | 8.41 | 7.53 | 8.81 | 9.18  | 8.57  | 8.62 |
| 7.58 | 9.18  | 7.28  | 4.12 | 6.79 | 8.94 | 11.8  | 9.97  | 2.75 |
| 7.57 | 9.17  | 7.22  | 3.29 | 6.97 | 9    | 11.83 | 10.08 | 0    |
| 7.71 | 9.03  | 7.93  | 3.91 | 6.94 | 8.56 | 11.74 | 10.06 | 3.33 |
| 8.19 | 9.06  | 8.84  | 6.39 | 5.93 | 7.93 | 11.32 | 10.46 | 2.24 |
| 7.39 | 9.01  | 8.3   | 6.19 | 6.02 | 7.67 | 10.82 | 9.53  | 5.98 |
| 7.69 | 9.32  | 8.43  | 6.49 | 6.3  | 7.86 | 11.06 | 9.78  | 5.75 |
| 5.16 | 13.01 | 8.49  | 7.16 | 7.97 | 8.62 | 7.16  | 12.93 | 6.75 |
| 7.7  | 8.03  | 8.24  | 5.18 | 7.37 | 5.42 | 10.45 | 10.2  | 2.59 |
| 8.04 | 8.99  | 9.02  | 6.82 | 6.88 | 6.82 | 10.72 | 10.16 | 3.12 |
| 7.81 | 9.94  | 8.56  | 4.5  | 7.39 | 5.7  | 10.79 | 11.4  | 4.5  |
| 7.54 | 10.92 | 9.02  | 4.99 | 7.94 | 6.97 | 10.85 | 11.46 | 5.99 |
| 8.32 | 10.22 | 9.64  | 5.71 | 7.35 | 7.02 | 11.26 | 10.83 | 3.86 |
| 6.39 | 7     | 7.9   | 8.17 | 6.83 | 8.07 | 8.65  | 8.69  | 7.7  |
| 6.03 | 4.86  | 8.06  | 8.42 | 7.16 | 8.13 | 8.67  | 7.95  | 7.89 |
| 6.23 | 4.35  | 7.57  | 7.9  | 6.81 | 7.29 | 8.19  | 7.74  | 7.72 |
| 7.41 | 9.06  | 8.06  | 5.1  | 5.22 | 6.67 | 10.23 | 9.06  | 1.59 |
| 7.54 | 9.37  | 9.18  | 4.59 | 6.61 | 6.26 | 10.43 | 8.83  | 4.05 |
| 6.93 | 9.89  | 8.89  | 4.81 | 7.22 | 5.69 | 10.11 | 9.37  | 3.11 |
| 7.78 | 9.62  | 10.23 | 4.74 | 7.44 | 6.98 | 10.72 | 8.97  | 3.16 |
| 6.07 | 6.6   | 7.19  | 7.39 | 6.38 | 7.76 | 7.75  | 8.16  | 7.18 |
| 5.68 | 6.08  | 7.15  | 6.97 | 6.32 | 7.59 | 7.68  | 8.24  | 6.59 |
| 5.84 | 6.38  | 6.79  | 6.87 | 6.16 | 7.34 | 8.14  | 8.63  | 6.32 |
| 6.95 | 2.91  | 7.62  | 7.38 | 7.24 | 7.97 | 7.89  | 7.53  | 7.89 |
| 4.92 | 6.09  | 7.27  | 7.4  | 6.58 | 7.31 | 7.48  | 7.42  | 6.83 |
| 6    | 5.68  | 7.31  | 7.35 | 6    | 7.27 | 7.59  | 7.21  | 6.49 |
| 5.56 | 6.65  | 7.19  | 7.55 | 6.42 | 7.08 | 7.71  | 7.68  | 6.52 |
| 9.8  | 5.87  | 7.11  | 6    | 8.05 | 7.17 | 7.05  | 7.11  | 7.9  |
| 6.84 | 6.48  | 8     | 8.37 | 7.45 | 8.24 | 8.55  | 8.5   | 7.71 |
| 6.33 | 5.39  | 8.41  | 8.68 | 7.36 | 8.65 | 9.03  | 8.1   | 8.17 |
| 6.54 | 7.06  | 7.86  | 7.79 | 6.42 | 7.74 | 9.19  | 10.15 | 6.95 |
| 6.42 | 6     | 7.95  | 8.03 | 7.27 | 8.36 | 8.55  | 9.06  | 7.71 |
| 7.01 | 8.57  | 7.97  | 7.76 | 6.9  | 7.75 | 9.13  | 8.95  | 7.14 |
| 6.52 | 7.69  | 8.02  | 8.38 | 7.52 | 7.88 | 8.31  | 8.66  | 7.74 |
| 6.35 | 4.29  | 7.99  | 8.24 | 7.49 | 8.1  | 8.07  | 8.27  | 7.61 |
| 7.52 | 7.59  | 8.26  | 8.26 | 7.9  | 8.27 | 8.41  | 8.37  | 8.23 |
| 7.96 | 6.97  | 7.44  | 6    | 5.58 | 7.01 | 10.74 | 9.79  | 5.56 |
| 7.44 | 7.12  | 7.43  | 6.1  | 6.5  | 6.91 | 10.72 | 10.2  | 4.87 |
| 7.58 | 7.46  | 7.58  | 6.58 | 6.72 | 7.06 | 10.68 | 10.18 | 5.76 |

<https://mc.manuscriptcentral.com/gut>



1  
2  
3  
4  
5  
6  
7  
8  
9  
10  
11  
12  
13  
14  
15  
16  
17  
18  
19  
20  
21  
22  
23  
24  
25  
26  
27  
28  
29  
30  
31  
32  
33  
34  
35  
36  
37  
38  
39  
40  
41  
42  
43  
44  
45  
46  
47  
48  
49  
50  
51  
52  
53  
54  
55  
56  
57  
58  
59  
60

|      |       |       |      |      |      |       |       |      |
|------|-------|-------|------|------|------|-------|-------|------|
| 7.73 | 6.91  | 7.67  | 7.18 | 6.2  | 7.44 | 10.21 | 10.14 | 6.38 |
| 8.04 | 8.89  | 8.82  | 7.12 | 7.19 | 7.53 | 11.76 | 10.61 | 6.13 |
| 8.01 | 9.02  | 8.91  | 6.88 | 7.9  | 7.47 | 11.55 | 10.85 | 6.42 |
| 7.86 | 7.96  | 7.93  | 6.2  | 7.47 | 6.85 | 11.61 | 10.81 | 6.95 |
| 7.63 | 7.69  | 7.91  | 6.46 | 7.29 | 7.05 | 11.67 | 10.73 | 6.34 |
| 8.39 | 8.2   | 8.47  | 7.16 | 6.39 | 7.88 | 11.51 | 9.75  | 6.85 |
| 8.16 | 9.78  | 9.28  | 6.46 | 7.4  | 7.87 | 11.76 | 10.98 | 6.72 |
| 8.51 | 8.96  | 8.14  | 5.91 | 6.77 | 7.41 | 11.97 | 10.46 | 5.65 |
| 8.49 | 10.39 | 10.61 | 6.47 | 9.46 | 9.01 | 11.29 | 10.97 | 7.97 |
| 8.99 | 10.54 | 8.78  | 5.46 | 8.02 | 5.85 | 11.5  | 11.26 | 5.01 |
| 8.68 | 10.34 | 9.1   | 6.07 | 8.17 | 6.91 | 12.11 | 10.58 | 5.59 |
| 8.81 | 10    | 9.55  | 6.65 | 8.01 | 6.69 | 11.64 | 10.73 | 6.06 |
| 9.02 | 10.6  | 8.73  | 5.06 | 8.32 | 6.02 | 11.48 | 10.75 | 5.65 |
| 7.67 | 7.99  | 7.53  | 6.56 | 5.48 | 6.63 | 11.12 | 10.02 | 7.38 |
| 8.15 | 8.71  | 8.8   | 5.09 | 6.98 | 5.92 | 11.53 | 10.68 | 5.46 |
| 7.67 | 9.86  | 9.62  | 6.34 | 8.03 | 7.68 | 10.76 | 10.51 | 7.33 |
| 8.25 | 9.11  | 8.03  | 6.91 | 6.67 | 7.81 | 10.82 | 9.51  | 4.9  |
| 8.12 | 9.37  | 8.72  | 4.91 | 6.9  | 5.8  | 11.02 | 10.11 | 2.67 |
| 8.5  | 9.7   | 8.85  | 5.8  | 8.35 | 7.03 | 11.23 | 10.16 | 5.22 |
| 8.31 | 8.41  | 8.07  | 5.02 | 6.06 | 7.49 | 11.27 | 9.82  | 4.74 |
| 7.94 | 8.41  | 7.52  | 4.83 | 6.94 | 5.65 | 12.62 | 10.32 | 2.35 |
| 7.87 | 7.83  | 6.99  | 3.39 | 6.73 | 5.61 | 12.47 | 10.48 | 0.48 |
| 7.91 | 9.98  | 9.79  | 6.99 | 7.35 | 7.21 | 10.82 | 9.79  | 5.81 |
| 7.94 | 10.06 | 9.61  | 6.42 | 7.51 | 6.36 | 11.23 | 9.98  | 5.74 |
| 8.7  | 12.45 | 10.7  | 5.96 | 9.74 | 8.82 | 10.74 | 12.09 | 6.47 |
| 7.62 | 7.57  | 6.9   | 5.92 | 4.95 | 6.8  | 9.99  | 8.37  | 1.95 |
| 6.92 | 7.84  | 8.21  | 4.7  | 6.81 | 6.65 | 10.27 | 8.85  | 4.7  |
| 7.29 | 7.1   | 7.31  | 4.67 | 6.32 | 5.22 | 10.54 | 8.59  | 3.93 |
| 7.48 | 7.83  | 7.71  | 4.71 | 8.45 | 5.6  | 11.12 | 7.63  | 1.9  |
| 5.66 | 6.57  | 6.51  | 7.37 | 6.34 | 7.28 | 7.66  | 6.76  | 6.71 |
| 5.85 | 9.17  | 6.91  | 7.2  | 6.08 | 6.87 | 7.8   | 8.51  | 6.7  |
| 6.21 | 4.97  | 7.01  | 7.39 | 5.69 | 7.21 | 7.9   | 7.36  | 7.05 |
| 5.42 | 7.11  | 7.17  | 7.04 | 6.24 | 7.04 | 7.4   | 7.45  | 6.6  |
| 6.53 | 6.51  | 6.29  | 6.06 | 5.53 | 6.11 | 9.42  | 8.69  | 5.38 |
| 6.63 | 6.86  | 7.2   | 6.52 | 6.52 | 6.51 | 9.12  | 8.37  | 5.83 |
| 6.45 | 7.42  | 7.44  | 6.35 | 6.83 | 6.18 | 9.38  | 8.03  | 6.21 |
| 6.66 | 7.67  | 8.01  | 6.07 | 6.52 | 6.07 | 9.63  | 8.21  | 5.83 |
| 8.55 | 8.24  | 6.64  | 7.42 | 4.16 | 7.44 | 10.57 | 8.39  | 4.16 |
| 8.28 | 9.2   | 7.61  | 5.85 | 5.46 | 6.37 | 11.29 | 10.46 | 5.78 |
| 8.01 | 9.16  | 8.58  | 6    | 7.09 | 7.17 | 12.35 | 11.08 | 2.42 |
| 7.69 | 11.1  | 8.93  | 5.82 | 6.04 | 8.68 | 10.33 | 12.01 | 5.55 |
| 7.39 | 7.47  | 7.93  | 6.08 | 6.09 | 7.05 | 11.01 | 9.77  | 6.1  |
| 7.83 | 11.45 | 9.21  | 5.51 | 7.97 | 8.6  | 11.34 | 11.37 | 6.51 |
| 7.85 | 8.88  | 9.21  | 5.23 | 6.97 | 6.58 | 11.17 | 10.21 | 2.19 |
| 7.75 | 9.14  | 9.19  | 4.18 | 7.77 | 5.91 | 11.34 | 10.27 | 2.74 |
| 7.34 | 6.24  | 5.21  | 3.27 | 6.17 | 3    | 12.05 | 11.1  | 0.68 |
| 7.1  | 8.06  | 8.32  | 6.17 | 7.43 | 7.27 | 11.72 | 10.72 | 5.54 |
| 6.98 | 7.93  | 7.62  | 4.45 | 7.13 | 6.85 | 12.05 | 10.64 | 4.28 |
| 7.26 | 7.8   | 7.77  | 6.47 | 7.72 | 7.17 | 11.6  | 10.35 | 6.14 |
| 7.1  | 8.26  | 8.07  | 4.48 | 4.57 | 6.88 | 10.72 | 9.53  | 1.89 |
| 6.57 | 8.19  | 8.46  | 5.17 | 6.87 | 6.31 | 10.15 | 9.01  | 5.62 |
| 6.79 | 8.26  | 8.79  | 5.96 | 6.52 | 6.31 | 10.06 | 8.92  | 5.23 |

<https://mc.manuscriptcentral.com/gut>

|      |       |      |      |      |      |       |       |      |
|------|-------|------|------|------|------|-------|-------|------|
| 7.5  | 9.49  | 9.8  | 3.6  | 8.21 | 6.25 | 10.33 | 10.14 | 3.11 |
| 6.56 | 8.7   | 7.96 | 4.91 | 6.93 | 5.01 | 11.2  | 9.4   | 5.19 |
| 6.91 | 7.46  | 6.61 | 4.67 | 6.08 | 4.67 | 11.11 | 9.17  | 5.05 |
| 6.88 | 7.69  | 6.35 | 4.29 | 6.42 | 3.95 | 11.34 | 9.3   | 4.29 |
| 5.25 | 9.27  | 7.41 | 7.05 | 6.84 | 7.17 | 8.87  | 9.12  | 7.23 |
| 7.62 | 7.77  | 8.06 | 4.99 | 6.01 | 6.36 | 10.89 | 9.78  | 3.27 |
| 7.57 | 6.47  | 6.39 | 3.71 | 4.62 | 5.85 | 10.88 | 9.54  | 3.46 |
| 7.33 | 6.67  | 6.02 | 3.94 | 5.13 | 5.5  | 10.94 | 9.64  | 2.67 |
| 5.23 | 4.27  | 7.53 | 7.35 | 6.72 | 7.92 | 8.24  | 7.4   | 7.45 |
| 6.86 | 7.38  | 7.66 | 7.05 | 6.61 | 7.04 | 9.36  | 9.04  | 6.52 |
| 8.2  | 8.43  | 8.6  | 5.3  | 5.11 | 6.62 | 10.38 | 10.01 | 2.97 |
| 7.73 | 8.46  | 8.83 | 5.89 | 6.84 | 5.89 | 10.46 | 9.53  | 5.93 |
| 7.81 | 9.17  | 9.13 | 4.55 | 7.26 | 5.89 | 10.59 | 10.07 | 5.47 |
| 7.95 | 8.63  | 9.74 | 5.45 | 6.52 | 6.45 | 10.59 | 9.21  | 5.3  |
| 6.24 | 12.26 | 8.83 | 3.54 | 7.35 | 7.87 | 9.36  | 12.97 | 6.54 |
| 7.39 | 7.59  | 7.25 | 5.91 | 5.68 | 7.49 | 10.41 | 9.59  | 4.61 |
| 7.04 | 7.34  | 7.35 | 6.3  | 6.42 | 6.96 | 10.04 | 8.85  | 5.52 |
| 7.22 | 7.91  | 7.49 | 5.56 | 5.31 | 7.6  | 10.38 | 9.74  | 4.45 |

1  
2  
3  
4  
5  
6  
7  
8  
9  
10  
11  
12  
13  
14  
15  
16  
17  
18  
19  
20  
21  
22  
23  
24  
25  
26  
27  
28  
29  
30  
31  
32  
33  
34  
35  
36  
37  
38  
39  
40  
41  
42  
43  
44  
45  
46  
47  
48  
49  
50  
51  
52  
53  
54  
55  
56  
57  
58  
59  
60

| CTSH  | CTSK  | CTSL | CUL1 | CX3CL1 | CXADR | CXCL10 | CXCL11 | CXCL12 |
|-------|-------|------|------|--------|-------|--------|--------|--------|
| 9.8   | 8.75  | 6.48 | 7.96 | 6.86   | 9.08  | 8.49   | 6.98   | 7.11   |
| 9.96  | 9.26  | 8.1  | 8.1  | 7.3    | 9.01  | 7.12   | 5.64   | 6.33   |
| 9.56  | 9.06  | 7.11 | 8.01 | 7.07   | 8.97  | 7.64   | 5.57   | 6.37   |
| 10.17 | 10.36 | 8.11 | 8.31 | 7.14   | 8.01  | 5.39   | 4.18   | 7.29   |
| 1.01  | 8.95  | 1.01 | 7.87 | 7.31   | 10.35 | 7.85   | 7.7    | 7.48   |
| 9.48  | 10.02 | 7.3  | 7.73 | 6.9    | 8.82  | 8.46   | 7.73   | 5.9    |
| 9.81  | 9.91  | 8.34 | 7.76 | 6.69   | 8.74  | 8.19   | 7.14   | 5.8    |
| 9.96  | 10.92 | 8.04 | 8.41 | 6.28   | 7.01  | 8.65   | 7.91   | 6.39   |
| 10.51 | 9.99  | 9.02 | 8.4  | 4.61   | 8.3   | 7.66   | 5.79   | 5.86   |
| 9.78  | 9.71  | 7.18 | 7.99 | 6.91   | 9.32  | 7.86   | 6.51   | 6.21   |
| 10.38 | 9.96  | 7.83 | 8.52 | 5.77   | 9.1   | 7.17   | 5.7    | 5.08   |
| 10    | 10.32 | 8.65 | 8.56 | 6.87   | 8.83  | 8.13   | 6.59   | 6.73   |
| 9.14  | 9.9   | 6.65 | 8.45 | 6.23   | 9.5   | 7.12   | 5.78   | 6.13   |
| 9.63  | 11.56 | 7.15 | 8.64 | 6.89   | 9.44  | 7.71   | 6.26   | 7.01   |
| 9.7   | 11.3  | 7.38 | 9.42 | 5.09   | 7.55  | 7.13   | 6.23   | 9.95   |
| 9.88  | 9.87  | 7.97 | 8.4  | 7.5    | 9.25  | 7.25   | 5.11   | 7.75   |
| 10    | 10.5  | 7.44 | 8.53 | 7.15   | 9.62  | 7.44   | 6.54   | 7.2    |
| 9.23  | 10.49 | 7.48 | 8.39 | 6.46   | 9.61  | 6.83   | 6.08   | 7.1    |
| 10.19 | 10    | 6.67 | 8.75 | 5.78   | 7.63  | 7.7    | 6.53   | 8.98   |
| 10.54 | 10.32 | 7.81 | 9.12 | 5.86   | 8.44  | 8.62   | 7.17   | 6.22   |
| 10.27 | 10.12 | 7.83 | 8.91 | 6.33   | 7.57  | 8.95   | 7.71   | 7.85   |
| 10.06 | 10.46 | 7.73 | 8.9  | 6.85   | 1.73  | 6.21   | 4.54   | 5.82   |
| 10.41 | 10.17 | 7.48 | 8.94 | 6.77   | 3.52  | 5.48   | 4.59   | 5.62   |
| 10.39 | 10.23 | 8.09 | 9    | 6.65   | 6.23  | 5.29   | 3.7    | 5.73   |
| 9.03  | 8.16  | 8.57 | 9.07 | 5.98   | 9.07  | 8.01   | 5.92   | 5.85   |
| 11.43 | 8.24  | 7.06 | 8.21 | 6.38   | 8.74  | 6.86   | 4.71   | 6.06   |
| 11.28 | 8.13  | 6.88 | 7.97 | 5.69   | 8.92  | 5.56   | 4.43   | 5.88   |
| 10.92 | 8.15  | 6.52 | 7.86 | 6.68   | 9.11  | 6.82   | 5.24   | 6.75   |
| 10.33 | 7.45  | 5.76 | 8.25 | 6.4    | 9.09  | 6.69   | 5.12   | 7.01   |
| 10.18 | 8.83  | 6.75 | 7.94 | 6.54   | 9.29  | 7.02   | 5.53   | 7.11   |
| 11.13 | 8.21  | 6.95 | 8.18 | 6.78   | 9.11  | 6.46   | 5      | 7.02   |
| 9.9   | 8.78  | 5.92 | 8.13 | 6.8    | 9.66  | 6.94   | 5.71   | 7.66   |
| 9.87  | 8.39  | 7.56 | 8.2  | 5.7    | 7.65  | 6.85   | 6.25   | 7.76   |
| 9.85  | 10.82 | 8.73 | 8.32 | 6.58   | 7.53  | 7.28   | 5.84   | 5.92   |
| 9.92  | 9.88  | 8.11 | 8.45 | 5.74   | 8.34  | 5.72   | 4      | 5.57   |
| 9.71  | 10.6  | 8.26 | 8.32 | 5.96   | 7.85  | 6.56   | 4.38   | 7.3    |
| 9.62  | 8.87  | 7.48 | 8.42 | 3.77   | 7.05  | 8.8    | 8.84   | 6.84   |
| 8.98  | 9.82  | 8.06 | 8.33 | 5.4    | 7.59  | 9.97   | 8.59   | 6.37   |
| 9.16  | 10.52 | 7.87 | 8.3  | 5.01   | 6.87  | 10.61  | 9.2    | 7.65   |
| 9.18  | 9.95  | 7.61 | 8.29 | 6.05   | 6.89  | 10.43  | 9.22   | 7.64   |
| 9.16  | 8.46  | 6.96 | 7.56 | 5.94   | 8.77  | 7.18   | 5.87   | 6.78   |
| 9.59  | 9.54  | 6.36 | 7.39 | 6.09   | 8.98  | 7.05   | 6.36   | 6.15   |
| 8.75  | 9.09  | 5.47 | 7.52 | 6.35   | 8.96  | 7.01   | 6.24   | 5.08   |
| 9.91  | 9.75  | 5.75 | 7.5  | 5.72   | 8.24  | 6.79   | 6.15   | 5.31   |
| 8.38  | 7.56  | 6.18 | 8.11 | 4.45   | 7.5   | 4.86   | 2.86   | 7.45   |
| 9.81  | 9.41  | 7.06 | 8.41 | 5.9    | 8.63  | 6.1    | 4.84   | 5.48   |
| 10.16 | 10.38 | 7.79 | 8.34 | 6.32   | 8.11  | 6.61   | 5.78   | 5.98   |
| 9.64  | 10.99 | 7.9  | 8.3  | 6.35   | 7.7   | 6.93   | 5.79   | 6.58   |
| 9.51  | 10.14 | 9.03 | 9.4  | 7.78   | 9.06  | 9.16   | 8.26   | 7.52   |
| 9.34  | 10.24 | 9.43 | 9.41 | 8.37   | 8.76  | 10.64  | 9.82   | 5.59   |
| 9.26  | 9.88  | 9.06 | 9.29 | 8.36   | 8.83  | 10.48  | 9.72   | 4.95   |

<https://mc.manuscriptcentral.com/gut>

## Gut

Page 194 of 656

1  
2  
3  
4  
5  
6  
7  
8  
9  
10  
11  
12  
13  
14  
15  
16  
17  
18  
19  
20  
21  
22  
23  
24  
25  
26  
27  
28  
29  
30  
31  
32  
33  
34  
35  
36  
37  
38  
39  
40  
41  
42  
43  
44  
45  
46  
47  
48  
49  
50  
51  
52  
53  
54  
55  
56  
57  
58  
59  
60

|       |       |      |       |      |       |       |      |       |
|-------|-------|------|-------|------|-------|-------|------|-------|
| 9.31  | 10.45 | 9.69 | 9.37  | 8.06 | 8.45  | 10.56 | 9.84 | 6.68  |
| 10.29 | 8.62  | 7.13 | 9.43  | 5.98 | 10.09 | 6.08  | 4.73 | 7.12  |
| 9.7   | 10.3  | 7.28 | 9.77  | 6.7  | 10.07 | 7.35  | 6.05 | 6.8   |
| 10.36 | 9.82  | 7.29 | 9.75  | 6.36 | 9.98  | 7.56  | 6.28 | 6.67  |
| 9.83  | 10.11 | 7.61 | 9.5   | 5.97 | 10.05 | 7.93  | 6.8  | 6.93  |
| 11.4  | 9.4   | 7.87 | 9.47  | 5.59 | 8.89  | 6.11  | 4.55 | 6.59  |
| 11.96 | 9.61  | 8.04 | 9.96  | 6.92 | 8.64  | 6.08  | 4.5  | 5.38  |
| 12.36 | 8.42  | 7.28 | 10.16 | 4.39 | 8.72  | 5.02  | 4.39 | 4.84  |
| 11.78 | 9.22  | 7.56 | 9.88  | 6.27 | 8.4   | 5.76  | 5.25 | 5.99  |
| 9.95  | 8.47  | 8.75 | 8.84  | 5.01 | 7.63  | 8.35  | 6.72 | 4.54  |
| 10.23 | 10.05 | 8.52 | 8.75  | 5.59 | 7.68  | 7.71  | 6    | 4.63  |
| 10.25 | 10.08 | 8.53 | 8.85  | 5.21 | 7.52  | 7.71  | 6.12 | 4.52  |
| 10.24 | 10.4  | 8.45 | 8.89  | 4.98 | 7.32  | 7.73  | 6.09 | 5.3   |
| 8.74  | 9.96  | 7.15 | 7.47  | 5.15 | 7.47  | 9.96  | 8.61 | 11.72 |
| 7.6   | 10.34 | 6.96 | 8.42  | 5.92 | 9.21  | 9.84  | 9.6  | 8.34  |
| 8.22  | 9.86  | 7.2  | 8.41  | 6.81 | 9.81  | 10.31 | 9.57 | 7.27  |
| 2.24  | 10.59 | 1.83 | 6.24  | 6.41 | 10.91 | 8.06  | 8.27 | 8.7   |
| 2.36  | 9.76  | 3.1  | 5.86  | 6.1  | 9.94  | 7.94  | 7.68 | 8.97  |
| 10    | 8.16  | 5.75 | 9.3   | 6.05 | 9.4   | 6.68  | 5.5  | 6.09  |
| 10.21 | 7.64  | 5.55 | 9.27  | 6.2  | 9.45  | 6.57  | 5.14 | 5.86  |
| 9.79  | 8.87  | 5.48 | 9.11  | 6.21 | 9.49  | 7.28  | 6.03 | 6.71  |
| 10.92 | 10.8  | 8.42 | 9.01  | 6.68 | 8.75  | 5.97  | 4.82 | 5.52  |
| 10.33 | 10.2  | 7.85 | 8.81  | 6.77 | 8.95  | 6.26  | 5.45 | 6.37  |
| 9.94  | 10.23 | 7.66 | 8.5   | 7    | 9.66  | 6.96  | 6.18 | 6.44  |
| 10.49 | 10.46 | 8.13 | 9.29  | 6.03 | 9.75  | 7.16  | 6.64 | 5.88  |
| 10.45 | 11.06 | 9.12 | 9.29  | 6.38 | 9.81  | 8.06  | 6.42 | 5.74  |
| 10.26 | 11.37 | 9.08 | 9.3   | 6.9  | 9.8   | 8.49  | 7.01 | 6.36  |
| 9.39  | 9.81  | 8.19 | 9.11  | 6.38 | 9     | 8.66  | 7.02 | 6.45  |
| 9.28  | 9.59  | 8.34 | 9.12  | 6.28 | 8.97  | 8.46  | 6.58 | 6.59  |
| 9.21  | 9.52  | 7.99 | 8.97  | 6.47 | 9.24  | 8.61  | 6.95 | 6.56  |
| 9.18  | 9.39  | 7.31 | 8.82  | 7.18 | 9.8   | 7.31  | 6.58 | 7.35  |
| 9.82  | 9.1   | 7.19 | 9.09  | 6.8  | 9.74  | 7.59  | 6.31 | 6.61  |
| 9.47  | 9.23  | 6.29 | 9     | 6.91 | 9.9   | 7.36  | 6.33 | 7.06  |
| 8.2   | 10.04 | 8    | 8.42  | 6.22 | 9.09  | 7.59  | 6.17 | 6.72  |
| 9.09  | 10.03 | 7.75 | 8.48  | 6.22 | 9.18  | 7.56  | 6.07 | 6.86  |
| 7.94  | 10.39 | 8.24 | 8.34  | 6.01 | 9.05  | 7.45  | 6.48 | 7.89  |
| 9.27  | 9.95  | 6.24 | 8.25  | 7.33 | 9.67  | 7.38  | 6.7  | 7.73  |
| 9.27  | 9.95  | 6.24 | 8.25  | 7.33 | 9.67  | 7.38  | 6.7  | 7.73  |
| 8.38  | 9.75  | 6.84 | 8.24  | 6.47 | 9.39  | 7.06  | 6.42 | 6.79  |
| 8.44  | 9.95  | 6.55 | 8.53  | 7.1  | 9.66  | 7.57  | 6.59 | 7.23  |
| 8.59  | 10.7  | 7.02 | 8.43  | 7.04 | 9.45  | 7.53  | 6.96 | 7.23  |
| 9.38  | 8.34  | 5.84 | 8.61  | 7.36 | 9.71  | 7.87  | 7.41 | 7.43  |
| 10.24 | 9.96  | 7.62 | 8.44  | 7.3  | 9.28  | 7.93  | 6.82 | 6.13  |
| 9.97  | 9.24  | 7.81 | 8.44  | 6.25 | 9.15  | 7.38  | 6.04 | 5.68  |
| 8.96  | 9.54  | 6.82 | 8.39  | 6.72 | 9.71  | 7.96  | 7.27 | 6.86  |
| 9.61  | 10.38 | 7.69 | 8.36  | 4.68 | 10.6  | 5.94  | 4.43 | 6.56  |
| 9.77  | 9.24  | 7.12 | 8.49  | 5.03 | 10.59 | 4.72  | 2.08 | 4.83  |
| 9.53  | 10.78 | 8.05 | 8.39  | 4.6  | 10.39 | 5.91  | 4.32 | 8.94  |
| 9.1   | 8.57  | 5.86 | 8.18  | 6.97 | 9.56  | 7.38  | 7.01 | 7.19  |
| 8.58  | 10.81 | 7.42 | 8.39  | 7.28 | 9.56  | 7.05  | 6.74 | 8.04  |
| 8.51  | 10.31 | 7.25 | 8.37  | 7.04 | 9.6   | 7.25  | 6.59 | 7.07  |
| 8.73  | 9.2   | 5.79 | 8.41  | 7.65 | 9.72  | 7.79  | 7.19 | 5.48  |

<https://mc.manuscriptcentral.com/gut>

|    |       |       |      |      |      |       |      |       |       |
|----|-------|-------|------|------|------|-------|------|-------|-------|
| 1  |       |       |      |      |      |       |      |       |       |
| 2  | 9.3   | 9.72  | 6.7  | 8.36 | 7.87 | 9.47  | 7.66 | 6.83  | 4.89  |
| 3  | 6.98  | 10.05 | 4.99 | 7.5  | 7.15 | 9.74  | 7.62 | 7.64  | 7.31  |
| 4  | 11.21 | 9.1   | 6.85 | 8.1  | 6.13 | 8.21  | 6.86 | 5.65  | 8.09  |
| 5  | 10.86 | 11.1  | 8.17 | 8.52 | 6.8  | 9.34  | 4.66 | 4.47  | 6.52  |
| 6  | 10.99 | 11.65 | 8.18 | 8.45 | 7.37 | 9.02  | 5.4  | 4.81  | 7.3   |
| 7  | 10.48 | 10.41 | 7.79 | 8.85 | 5.93 | 7.82  | 8.38 | 6.95  | 7.49  |
| 8  | 11.63 | 10.14 | 8.32 | 8.46 | 4.55 | 8.54  | 6.42 | 4.45  | 3.8   |
| 9  | 11.22 | 10.47 | 8.58 | 8.61 | 5.22 | 8.57  | 8.1  | 5.78  | 5     |
| 10 | 9.56  | 11.43 | 7.45 | 8.95 | 4.49 | 8.4   | 7.08 | 6.3   | 9.52  |
| 11 | 10.19 | 9.32  | 7.04 | 8.92 | 6.63 | 7.9   | 6.46 | 5.11  | 7.52  |
| 12 | 10.36 | 9.08  | 6.7  | 9.06 | 6.7  | 8.08  | 7.79 | 6.68  | 4.88  |
| 13 | 9.83  | 8.57  | 6.41 | 8.5  | 6.91 | 8.69  | 7.97 | 6.94  | 5.28  |
| 14 | 9.21  | 11.4  | 6.78 | 8.96 | 5.07 | 7.55  | 6.07 | 6.35  | 10.01 |
| 15 | 0.2   | 9.45  | 1.2  | 7.28 | 7.42 | 9.97  | 7.8  | 6.87  | 9.13  |
| 16 | 9.76  | 9.16  | 7.85 | 8.19 | 4.41 | 8.47  | 4.9  | 3.27  | 5.41  |
| 17 | 10.21 | 8.82  | 7.79 | 8.12 | 5.23 | 8.47  | 4.64 | 2.83  | 4.79  |
| 18 | 10    | 8.89  | 7.62 | 8.08 | 5.27 | 8.53  | 4.61 | 3.22  | 5.01  |
| 19 | 9.72  | 10.37 | 7.48 | 8.84 | 8.32 | 8.16  | 9.63 | 10.46 | 4.99  |
| 20 | 8.8   | 10.45 | 6.43 | 8.26 | 7.09 | 7.97  | 8.99 | 9.61  | 6.19  |
| 21 | 9.74  | 10.45 | 7.4  | 8.39 | 7.59 | 7.64  | 9.74 | 10.46 | 6.38  |
| 22 | 7.16  | 8.33  | 6.16 | 7.16 | 7.49 | 8.16  | 6.16 | 5.16  | 12.47 |
| 23 | 11.1  | 8.92  | 8.02 | 7.77 | 6.51 | 9.08  | 6.19 | 3.94  | 4.09  |
| 24 | 10.6  | 9.96  | 8.28 | 7.99 | 6.56 | 8.37  | 7.81 | 5.39  | 4.93  |
| 25 | 10.42 | 9.57  | 6.82 | 8.82 | 4.35 | 8.6   | 4.35 | 4.99  | 6.22  |
| 26 | 10.4  | 10.76 | 6.43 | 8.72 | 4.37 | 8.28  | 5.76 | 3.91  | 7.84  |
| 27 | 10.57 | 10.62 | 7.47 | 8.75 | 5.3  | 8.03  | 6.71 | 5.54  | 7.83  |
| 28 | 5.9   | 8.92  | 3    | 7.92 | 7.44 | 10.05 | 7.74 | 6.72  | 8.18  |
| 29 | 0.86  | 8.39  | 0.86 | 8.06 | 7.67 | 10.3  | 8.28 | 7.11  | 8.24  |
| 30 | 2.77  | 8.14  | 2.77 | 7.98 | 7.65 | 10.21 | 8.16 | 6.81  | 7.29  |
| 31 | 9.82  | 9.72  | 6.8  | 7.78 | 5.14 | 6.56  | 5.84 | 4.71  | 5.82  |
| 32 | 9.25  | 11.09 | 7.41 | 7.51 | 5.21 | 5.45  | 4.29 | 2.18  | 6.86  |
| 33 | 9.87  | 10.14 | 7    | 7.99 | 4.81 | 6.43  | 4.43 | 2.69  | 6.85  |
| 34 | 9.03  | 10.81 | 7.46 | 7.63 | 5.71 | 5.58  | 4.91 | 2.96  | 7.46  |
| 35 | 3.26  | 7.79  | 2.04 | 6.66 | 6.68 | 9.22  | 7.21 | 6.91  | 8.01  |
| 36 | 3.84  | 7.45  | 1.25 | 7.4  | 6.79 | 9     | 7.26 | 6.36  | 5.98  |
| 37 | 5.02  | 7.37  | 0.93 | 7.31 | 6.51 | 8.7   | 6.87 | 6.39  | 6.81  |
| 38 | 0     | 8.43  | 0    | 5.57 | 5.97 | 9.17  | 7.57 | 7.54  | 7.2   |
| 39 | 3.66  | 7.73  | 1.34 | 7.54 | 7.06 | 9.42  | 7.46 | 6.95  | 6.66  |
| 40 | 2.68  | 7.9   | 1.1  | 7.57 | 7.16 | 9.52  | 7.14 | 6.88  | 6.71  |
| 41 | 3.31  | 8.08  | 1.89 | 7.66 | 7.09 | 9.41  | 7.06 | 6.86  | 6.06  |
| 42 | 2.41  | 9.93  | 2.41 | 4    | 4    | 7.97  | 6    | 7.66  | 7.22  |
| 43 | 5.45  | 8.48  | 4.06 | 8.22 | 7.66 | 10.66 | 8.02 | 7.55  | 7.96  |
| 44 | 0     | 8.56  | 1.33 | 8.68 | 8.07 | 10.93 | 8.64 | 7.77  | 7.56  |
| 45 | 7.55  | 8.33  | 4.95 | 8.09 | 6.91 | 9.93  | 7.99 | 7.55  | 7.99  |
| 46 | 4.5   | 8.23  | 2.75 | 8.03 | 7.5  | 10.39 | 8.15 | 7.35  | 7.38  |
| 47 | 7.8   | 8.81  | 5.32 | 7.67 | 7.13 | 9.92  | 7.34 | 6.96  | 7.85  |
| 48 | 4.3   | 8.95  | 2.88 | 7.89 | 7.75 | 10.6  | 7.7  | 7.01  | 7.87  |
| 49 | 0.71  | 8.93  | 0.71 | 8.02 | 7.9  | 10.83 | 8.05 | 7.18  | 6.54  |
| 50 | 4.22  | 9.49  | 1.48 | 6.94 | 7.01 | 10.47 | 8.09 | 8.3   | 8.1   |
| 51 | 8.9   | 8.39  | 6.71 | 8.56 | 6.12 | 9.54  | 7.86 | 7.1   | 4.87  |
| 52 | 9.1   | 9.24  | 7.99 | 8.48 | 6.03 | 9.17  | 7.48 | 6.77  | 4.99  |
| 53 | 9.2   | 9.25  | 8.51 | 8.49 | 6.21 | 9.27  | 7.84 | 6.8   | 6.68  |

1  
2  
3  
4  
5  
6  
7  
8  
9  
10  
11  
12  
13  
14  
15  
16  
17  
18  
19  
20  
21  
22  
23  
24  
25  
26  
27  
28  
29  
30  
31  
32  
33  
34  
35  
36  
37  
38  
39  
40  
41  
42  
43  
44  
45  
46  
47  
48  
49  
50  
51  
52  
53  
54  
55  
56  
57  
58  
59  
60

|       |       |      |      |      |       |      |      |      |
|-------|-------|------|------|------|-------|------|------|------|
| 9.21  | 8.99  | 8.04 | 8.39 | 6.27 | 9.29  | 8.19 | 7.22 | 6.74 |
| 10.31 | 10.1  | 7.76 | 8.81 | 6.07 | 9.48  | 8.02 | 6.6  | 7.6  |
| 9.74  | 10.45 | 7.96 | 8.83 | 5.99 | 9.81  | 7.14 | 5.41 | 7.77 |
| 10.37 | 9.18  | 8.02 | 8.93 | 6.06 | 9.54  | 7.25 | 6.87 | 7.39 |
| 10.64 | 9.34  | 8.27 | 8.94 | 5.54 | 9.53  | 7.53 | 6.17 | 7.21 |
| 11.32 | 9.78  | 7.96 | 8.18 | 5.95 | 9.13  | 8.34 | 7.36 | 7.06 |
| 11.14 | 10.83 | 8.37 | 8.66 | 5.37 | 8.65  | 7.51 | 6.2  | 7.82 |
| 11.39 | 10.09 | 8.13 | 8.4  | 5.76 | 8.69  | 7.76 | 5.91 | 6.35 |
| 10.81 | 10.96 | 7.99 | 9.19 | 5.65 | 7.93  | 8.1  | 6.85 | 9.52 |
| 10.53 | 9.36  | 8.36 | 9.18 | 6.22 | 9.48  | 7.19 | 5.41 | 6.91 |
| 10.15 | 10.38 | 8.48 | 9.52 | 6.91 | 9.27  | 7.6  | 6.14 | 6.67 |
| 10.16 | 11    | 8.71 | 9.66 | 7.22 | 9.57  | 8.17 | 6.98 | 6.41 |
| 10.03 | 9.61  | 8.26 | 9.57 | 6.11 | 9.49  | 7.27 | 5.95 | 6.54 |
| 10.42 | 8.82  | 7.7  | 8.26 | 5.73 | 8.49  | 6.47 | 5.59 | 6.53 |
| 11.07 | 9.83  | 8.22 | 8.63 | 5.83 | 7.73  | 6.75 | 5.42 | 5.32 |
| 9.4   | 10.61 | 7.38 | 8.4  | 6.25 | 8.69  | 6.65 | 6.32 | 8.2  |
| 10.29 | 9.82  | 7.65 | 8.62 | 6.04 | 7.17  | 7    | 6.6  | 8.39 |
| 9.4   | 10.64 | 8.09 | 8.38 | 5.06 | 8.33  | 5.91 | 5.52 | 6.06 |
| 9.18  | 10.79 | 8.57 | 8.58 | 6.16 | 7.34  | 7.45 | 7.23 | 7.27 |
| 10.02 | 9.51  | 7.62 | 8.39 | 5.97 | 11.09 | 6.93 | 6.53 | 6.71 |
| 10.4  | 11.1  | 7.45 | 8.89 | 5.3  | 8.16  | 7.12 | 4.79 | 5.04 |
| 10.38 | 9.37  | 6.32 | 8.62 | 4.61 | 9.69  | 4.65 | 3.39 | 4.48 |
| 9.88  | 9.9   | 7.32 | 8.47 | 6.43 | 9.41  | 6.83 | 4.57 | 6.89 |
| 10.31 | 9.85  | 7.14 | 8.26 | 6.1  | 9.89  | 7.12 | 5.88 | 6.42 |
| 8.74  | 10.43 | 7.54 | 9.03 | 5.15 | 9.03  | 4.15 | 3.15 | 9.54 |
| 9.73  | 9.18  | 6.74 | 7.63 | 4.61 | 6.14  | 7.23 | 5.82 | 5.72 |
| 9     | 9.34  | 7.84 | 7.52 | 5.11 | 6.86  | 7.31 | 6    | 4.88 |
| 8.76  | 9.69  | 7.84 | 7.57 | 5.49 | 7.08  | 8.38 | 6.38 | 3.76 |
| 8.67  | 10.75 | 8.83 | 8.03 | 6.71 | 6.36  | 9.09 | 5.81 | 5.6  |
| 3.76  | 7.22  | 2.76 | 7.54 | 7.08 | 9.49  | 7.31 | 6.93 | 6.93 |
| 4.18  | 8.36  | 3.3  | 7.13 | 6.42 | 9.39  | 6.76 | 6.08 | 6.85 |
| 0.88  | 7.44  | 0.88 | 7.69 | 6.61 | 9.7   | 7.21 | 7.09 | 6.69 |
| 0.96  | 7.24  | 0.96 | 7.56 | 6.81 | 9.5   | 7.09 | 6.48 | 6.98 |
| 9.89  | 7.11  | 6.4  | 7.56 | 5.55 | 8.38  | 6.46 | 5.03 | 5.49 |
| 8.71  | 8.1   | 5.05 | 7.4  | 6.56 | 8.65  | 7.18 | 6.04 | 6.58 |
| 9     | 8.77  | 5.88 | 7.41 | 6.23 | 8.65  | 6.73 | 5.83 | 5.79 |
| 8.78  | 8.98  | 6.6  | 7.32 | 5.92 | 8.3   | 6.46 | 5.74 | 6.47 |
| 10.72 | 8.56  | 7.28 | 8.69 | 5.85 | 3.94  | 6.03 | 3.16 | 7.7  |
| 10.71 | 10.4  | 6.63 | 8.02 | 5.37 | 9.31  | 6.27 | 5.27 | 6.16 |
| 10.58 | 9.36  | 7.5  | 8.73 | 5.17 | 9.07  | 9.7  | 8.79 | 4.81 |
| 9.54  | 10.5  | 6.76 | 8.85 | 4.82 | 7.52  | 7.59 | 7.99 | 8.88 |
| 10.01 | 9.5   | 7.38 | 7.85 | 5.1  | 8.53  | 7.33 | 5.51 | 6.97 |
| 9.32  | 11.11 | 4.51 | 8.51 | 4.51 | 8.32  | 8.32 | 7.83 | 9.37 |
| 10.34 | 11.09 | 7.79 | 9.02 | 5.42 | 7.48  | 6.44 | 4.87 | 5.42 |
| 10.69 | 11.43 | 8.19 | 9.38 | 4.1  | 7.55  | 7.24 | 5.36 | 5.98 |
| 11.19 | 5.85  | 8.5  | 8.97 | 5.85 | 9.74  | 4.59 | 2.27 | 5.97 |
| 10.42 | 9.3   | 8.25 | 8.87 | 6.07 | 8.79  | 7.64 | 5.57 | 6.75 |
| 10.61 | 9.41  | 8.33 | 8.88 | 5.7  | 8.86  | 6.54 | 4.45 | 6.78 |
| 10.31 | 9.06  | 8.17 | 8.72 | 6.41 | 9.05  | 7.88 | 5.9  | 6.96 |
| 9.76  | 8.83  | 7.7  | 8.12 | 3.48 | 7.33  | 4.38 | 3.38 | 6.19 |
| 8.94  | 10.04 | 7.17 | 7.79 | 5.53 | 7.86  | 6.23 | 4.62 | 6.39 |
| 8.42  | 9.82  | 7.1  | 7.6  | 5.23 | 7.9   | 5.56 | 4.83 | 6.14 |

<https://mc.manuscriptcentral.com/gut>

1  
2  
3  
4  
5  
6  
7  
8  
9  
10  
11  
12  
13  
14  
15  
16  
17  
18  
19  
20  
21  
22  
23  
24  
25  
26  
27  
28  
29  
30  
31  
32  
33  
34  
35  
36  
37  
38  
39  
40  
41  
42  
43  
44  
45  
46  
47  
48  
49  
50  
51  
52  
53  
54  
55  
56  
57  
58  
59  
60

|       |       |      |      |      |      |      |      |      |
|-------|-------|------|------|------|------|------|------|------|
| 8.32  | 9.35  | 6.98 | 8.13 | 5.43 | 6.52 | 4.79 | 3.79 | 6.98 |
| 8.13  | 9.17  | 6.31 | 7.31 | 4.8  | 5.56 | 5.19 | 4.27 | 6.88 |
| 9.35  | 8.81  | 6.67 | 7.11 | 5.17 | 6.08 | 4.67 | 3.39 | 6.26 |
| 9.69  | 8.95  | 6.13 | 7.22 | 4.66 | 5.66 | 4.81 | 3.07 | 4.95 |
| 4.72  | 8.01  | 3.55 | 7.08 | 6.6  | 9.47 | 7.14 | 5.46 | 8.25 |
| 9.07  | 8.41  | 7.92 | 8.17 | 6.07 | 7.54 | 7.35 | 5.92 | 6.09 |
| 8.07  | 6.93  | 6.81 | 8.08 | 6.14 | 7.73 | 7.1  | 7.93 | 3.53 |
| 8.08  | 6.73  | 6.5  | 8.03 | 6.02 | 7.87 | 7.09 | 8.12 | 3.52 |
| 0.27  | 7.75  | 1.86 | 7.46 | 7.12 | 9.91 | 7.7  | 6.7  | 6.99 |
| 8.04  | 9.12  | 5.37 | 7.84 | 6.41 | 9.32 | 6.98 | 6.23 | 6.59 |
| 10.01 | 9.43  | 6.93 | 8.31 | 4.97 | 7.33 | 5.46 | 5.35 | 6.19 |
| 9.22  | 9.64  | 7.53 | 8.2  | 6.14 | 8.1  | 6.38 | 5.06 | 6.59 |
| 9.44  | 9.61  | 7.19 | 8.42 | 5.35 | 8.03 | 5    | 5.06 | 6.64 |
| 9.28  | 10.48 | 7.46 | 8.07 | 5.8  | 7.39 | 6.23 | 5.34 | 7.48 |
| 8.69  | 9.26  | 5.13 | 8.1  | 3.54 | 6.54 | 5.54 | 4.54 | 9.54 |
| 9.91  | 9.86  | 7.83 | 8.24 | 4.84 | 7.21 | 7.87 | 6.31 | 6.14 |
| 9.58  | 9.16  | 7.04 | 7.86 | 5.12 | 8.27 | 7.94 | 6.61 | 6.19 |
| 9.89  | 9.95  | 7.82 | 8.34 | 4.84 | 7.04 | 7.58 | 5.86 | 6.45 |

1  
2  
3  
4  
5  
6  
7  
8  
9  
10  
11  
12  
13  
14  
15  
16  
17  
18  
19  
20  
21  
22  
23  
24  
25  
26  
27  
28  
29  
30  
31  
32  
33  
34  
35  
36  
37  
38  
39  
40  
41  
42  
43  
44  
45  
46  
47  
48  
49  
50  
51  
52  
53  
54  
55  
56  
57  
58  
59  
60

| CXCL13 | CXCL17 | CXCL8 | CXCR2 | CXCR3 | CXCR4 | CYB561 | CYBB  | CYP1B1 |
|--------|--------|-------|-------|-------|-------|--------|-------|--------|
| 8.26   | 9.14   | 8.12  | 8.62  | 7.09  | 10.58 | 8.04   | 8.48  | 6.79   |
| 3.42   | 7.62   | 10.22 | 8.07  | 5.92  | 9.19  | 8.51   | 8.51  | 4.59   |
| 3.08   | 8.21   | 9.69  | 8.32  | 6.57  | 8.87  | 8.61   | 8.34  | 5.51   |
| 4.18   | 7.99   | 13.14 | 6.48  | 5.61  | 9.85  | 9.22   | 8.63  | 6.39   |
| 3.01   | 8.89   | 7.68  | 9.97  | 7.87  | 7.71  | 8.72   | 7.35  | 6.53   |
| 6.87   | 10.34  | 11.08 | 8.38  | 6.18  | 10    | 8.8    | 7.95  | 5.05   |
| 6.47   | 10.55  | 12.27 | 8.12  | 5.85  | 10.48 | 8.99   | 8.46  | 4.67   |
| 8.12   | 10.84  | 11.7  | 4.92  | 6.42  | 10.57 | 10.51  | 9.65  | 6.35   |
| 6.6    | 8.95   | 8.75  | 5.12  | 6.58  | 10.89 | 9.44   | 9.55  | 7.69   |
| 4.95   | 8.12   | 9.7   | 7.91  | 5.74  | 9.17  | 8.58   | 7.48  | 5.49   |
| 5.51   | 9.68   | 11.13 | 5.77  | 4.38  | 9.96  | 9.02   | 8.44  | 5.93   |
| 6.89   | 8.2    | 11.47 | 6     | 5.14  | 10.27 | 8.93   | 8.62  | 7.33   |
| 5.23   | 7.33   | 10.7  | 8.01  | 6.26  | 7.84  | 8.43   | 7.43  | 5.52   |
| 6.86   | 6.66   | 11.64 | 8.19  | 6.79  | 8.81  | 8.5    | 8.62  | 5.63   |
| 9.74   | 2.77   | 7.55  | 5.58  | 8.09  | 10.32 | 11.04  | 11.05 | 8.19   |
| 7.99   | 6.59   | 11.4  | 8.62  | 6.4   | 11.65 | 8.66   | 8.81  | 7.97   |
| 7.81   | 8.17   | 9.5   | 8.66  | 6.04  | 10.28 | 9.04   | 8.28  | 6.72   |
| 4.08   | 7.03   | 11.73 | 8.83  | 6.54  | 10.64 | 9.19   | 7.52  | 7.35   |
| 8.4    | 4.85   | 7.39  | 4.42  | 8.54  | 11.86 | 9.6    | 9.64  | 8.15   |
| 8.24   | 8.84   | 9.92  | 4.26  | 7.29  | 10.83 | 9.08   | 9.23  | 7.22   |
| 8.87   | 3.75   | 8.3   | 4.71  | 8.18  | 11.47 | 8.8    | 9.62  | 8.89   |
| 4.9    | 10.29  | 8.66  | 4.96  | 5.1   | 9.98  | 9.06   | 8.4   | 5.82   |
| 4.2    | 11.05  | 8.32  | 4.01  | 4.29  | 9.93  | 9.38   | 7.97  | 4.66   |
| 5.68   | 9.8    | 8.68  | 3.89  | 4.8   | 10.1  | 9.28   | 8.21  | 7.25   |
| 6.93   | 5.38   | 7.08  | 5.18  | 6.45  | 9.65  | 8.06   | 8.46  | 6.04   |
| 4.88   | 6.65   | 10.78 | 5.86  | 4.38  | 9.21  | 8.94   | 7.64  | 4.59   |
| 3.33   | 6.75   | 11.34 | 6.19  | 5.22  | 8.55  | 9.04   | 7.49  | 3.69   |
| 4.31   | 8.11   | 11.65 | 8.17  | 6.56  | 10.08 | 9.03   | 7.96  | 4.96   |
| 7.16   | 6.86   | 6.99  | 7.97  | 6.96  | 10.12 | 8.33   | 7.92  | 6.56   |
| 6.15   | 7.12   | 12.01 | 8.37  | 6.91  | 9.71  | 8.79   | 8.39  | 6.95   |
| 3.9    | 6.7    | 11.4  | 7.99  | 6.96  | 8.69  | 8.88   | 7.64  | 5.9    |
| 5.61   | 7.65   | 8.24  | 8.99  | 7.38  | 9.53  | 8.77   | 8.5   | 7.59   |
| 10.25  | 5.92   | 7.63  | 8.2   | 7.05  | 12.58 | 7.1    | 9.69  | 7.12   |
| 3.97   | 10.08  | 13.2  | 5.97  | 4.64  | 10.3  | 9.32   | 8.82  | 7.93   |
| 4.78   | 9.96   | 13.78 | 5.49  | 4.97  | 9.92  | 9.65   | 8.22  | 5.82   |
| 5.06   | 9.91   | 9.73  | 5.28  | 5.17  | 10.33 | 9.7    | 8.71  | 7.93   |
| 9.77   | 1.45   | 11.5  | 7.41  | 7.64  | 12.43 | 9.39   | 10.11 | 6.15   |
| 9.78   | 4.05   | 13.33 | 6.8   | 7.53  | 11.07 | 9.31   | 9.15  | 6.32   |
| 10.56  | 2.95   | 11.2  | 6.81  | 8.29  | 11.52 | 8.67   | 9.47  | 7.07   |
| 10.37  | 2.33   | 10.17 | 6.59  | 8.41  | 11.58 | 8.64   | 9.69  | 7.37   |
| 5.58   | 9.38   | 8.91  | 8.3   | 5.97  | 9.92  | 7.85   | 7.43  | 7.07   |
| 4.7    | 9.35   | 9.02  | 8.21  | 6.05  | 8.98  | 8.08   | 6.51  | 5.45   |
| 4.97   | 8.95   | 8.71  | 8.04  | 6.17  | 8.34  | 8.2    | 6.74  | 5.61   |
| 4.62   | 9.62   | 8.51  | 7.22  | 5.4   | 8.83  | 8.29   | 6.17  | 5.02   |
| 5.45   | 3.86   | 6.67  | 5.86  | 5.45  | 9.3   | 10.65  | 7.81  | 6.18   |
| 7.26   | 8.56   | 6.17  | 4.12  | 5.07  | 10.22 | 9.11   | 7.77  | 5.36   |
| 6.61   | 4.81   | 7.57  | 3.58  | 5.52  | 10.02 | 8.99   | 7.99  | 5.58   |
| 6.7    | 3.13   | 6.71  | 3.62  | 5.33  | 10.13 | 8.55   | 7.58  | 6.87   |
| 8.35   | 5.54   | 9.73  | 5.84  | 6.99  | 10.89 | 9.06   | 10.02 | 7.97   |
| 7.91   | 7.7    | 13.27 | 7.13  | 5.89  | 10.55 | 8.97   | 9.15  | 7.2    |
| 8.76   | 3.3    | 11.32 | 7.41  | 6.02  | 10.68 | 9.28   | 9.43  | 4.5    |

<https://mc.manuscriptcentral.com/gut>



1  
2  
3  
4  
5  
6  
7  
8  
9  
10  
11  
12  
13  
14  
15  
16  
17  
18  
19  
20  
21  
22  
23  
24  
25  
26  
27  
28  
29  
30  
31  
32  
33  
34  
35  
36  
37  
38  
39  
40  
41  
42  
43  
44  
45  
46  
47  
48  
49  
50  
51  
52  
53  
54  
55  
56  
57  
58  
59  
60

|      |       |       |       |      |       |       |       |      |
|------|-------|-------|-------|------|-------|-------|-------|------|
| 9.09 | 8.57  | 11.42 | 7.09  | 6.21 | 11.3  | 9.13  | 9.93  | 7.82 |
| 4.84 | 6.67  | 7.25  | 8.37  | 6.62 | 9.51  | 9.24  | 7.32  | 5.81 |
| 3.77 | 6.8   | 9.98  | 8.56  | 6.28 | 8.63  | 9.53  | 7.94  | 4.44 |
| 5.93 | 6.29  | 10.13 | 8.16  | 6.02 | 8.55  | 9.54  | 7.72  | 4.48 |
| 6.38 | 6.94  | 7.62  | 8.54  | 6.46 | 9.31  | 9.29  | 8.44  | 6.2  |
| 7.91 | 4.48  | 6.69  | 6.75  | 6.18 | 12.36 | 9.44  | 8.51  | 8.35 |
| 5.89 | 3.57  | 8.08  | 4.89  | 4.95 | 10.7  | 10.07 | 8.11  | 5.57 |
| 4.59 | 3     | 8.55  | 4.84  | 3.65 | 9.65  | 10.28 | 6.2   | 3.59 |
| 6.48 | 3.44  | 8.33  | 4.9   | 5.08 | 11.2  | 10    | 7.27  | 7.27 |
| 7.46 | 1.9   | 6.6   | 4.34  | 6.15 | 10.32 | 9.19  | 8.52  | 6.4  |
| 7.82 | 9.18  | 10.59 | 5.3   | 5.67 | 10.5  | 9.37  | 8.79  | 5.5  |
| 6.32 | 6.98  | 9.71  | 5.24  | 5.24 | 9.89  | 9.19  | 8.42  | 4.62 |
| 7.75 | 6.47  | 8.03  | 4.68  | 5.56 | 10.16 | 9.09  | 8.29  | 6.56 |
| 7.74 | 8.61  | 10.71 | 9.61  | 9.32 | 9.06  | 11.4  | 7.96  | 6.15 |
| 8.2  | 7.63  | 12.42 | 8.81  | 8.06 | 9.94  | 10.38 | 10.13 | 5.11 |
| 7.51 | 7.94  | 11.42 | 8.99  | 7.5  | 9.88  | 9.53  | 9.67  | 5.91 |
| 0.24 | 8.95  | 9.51  | 10.33 | 9.12 | 8.26  | 9.89  | 6.75  | 7.04 |
| 2.77 | 8.58  | 9.16  | 10.28 | 8.96 | 8.54  | 9.95  | 6.94  | 7.17 |
| 4.14 | 6.23  | 11.48 | 7.9   | 5.78 | 8.57  | 8.77  | 6.66  | 3.14 |
| 3.35 | 6.4   | 11.3  | 7.94  | 5.41 | 7.64  | 8.63  | 6.79  | 4.07 |
| 6.43 | 7.12  | 10.77 | 8.25  | 5.96 | 9.46  | 8.67  | 7.7   | 5.86 |
| 6.04 | 6.46  | 8.17  | 4.27  | 5.16 | 10.23 | 9.18  | 8.41  | 6.03 |
| 6.47 | 6.53  | 8.49  | 6.75  | 5.6  | 9.72  | 8.89  | 8.16  | 5.67 |
| 3.86 | 7.44  | 7.41  | 8.44  | 6.05 | 9.65  | 8.15  | 8.03  | 6.8  |
| 8.64 | 11.57 | 10.29 | 6.83  | 6.52 | 11.04 | 9.59  | 8.55  | 6.16 |
| 7.69 | 11.03 | 11.27 | 6.17  | 5.8  | 10.57 | 9.45  | 8.47  | 5.6  |
| 7.86 | 10.42 | 10.16 | 5.45  | 6.3  | 10.48 | 9.59  | 8.6   | 6.33 |
| 6.87 | 8.38  | 11.48 | 8.25  | 6.64 | 9.34  | 9.07  | 8.95  | 5.61 |
| 6.21 | 6.59  | 11.67 | 7.94  | 6.39 | 8.9   | 8.94  | 8.76  | 6.58 |
| 7.16 | 7.01  | 9.72  | 8.45  | 6.92 | 9.52  | 8.93  | 8.91  | 6.68 |
| 4.44 | 7     | 9.2   | 8.96  | 6.86 | 9.63  | 8.75  | 7.98  | 7.07 |
| 4.01 | 6.9   | 7.39  | 8.88  | 6.64 | 8.5   | 9     | 8.31  | 5.72 |
| 4.31 | 7.37  | 8.23  | 9.14  | 7.1  | 9.04  | 9.19  | 8.26  | 5.38 |
| 3.98 | 7.61  | 10.71 | 8.44  | 6.52 | 9.18  | 9.19  | 8.27  | 6.87 |
| 3.88 | 7.7   | 12.79 | 8.84  | 6.61 | 9.09  | 9.4   | 7.87  | 5.49 |
| 5.28 | 7.78  | 11.82 | 8.58  | 6.73 | 9.7   | 9.08  | 8.25  | 7.82 |
| 8.66 | 8.41  | 9.96  | 9.06  | 6.65 | 11.74 | 8.68  | 8.21  | 8.31 |
| 8.66 | 8.41  | 9.96  | 9.06  | 6.65 | 11.74 | 8.68  | 8.21  | 8.31 |
| 5.61 | 9.48  | 8.98  | 8.65  | 6.72 | 9.91  | 9.32  | 7.55  | 6.42 |
| 5.57 | 9.1   | 9.32  | 8.97  | 6.44 | 9.75  | 9     | 7.6   | 7.63 |
| 3.15 | 9.42  | 8.97  | 8.63  | 6.54 | 9.81  | 9     | 7.34  | 8.7  |
| 8.5  | 8.53  | 9.16  | 9.18  | 7.05 | 10.13 | 7.89  | 8.26  | 6.89 |
| 4.3  | 9.29  | 13.69 | 8.71  | 6.28 | 9.73  | 8.19  | 8.24  | 6.85 |
| 4.59 | 9.15  | 11.61 | 8.25  | 6.41 | 10.2  | 8.48  | 7.92  | 6.25 |
| 6.07 | 8.65  | 8.85  | 9.22  | 6.57 | 9.18  | 8.32  | 8.39  | 7.17 |
| 5.56 | 1.73  | 11.3  | 6.12  | 5.88 | 9.85  | 9.43  | 8.34  | 5.22 |
| 1.66 | 3.25  | 10.59 | 4.93  | 4.88 | 8.31  | 9.6   | 7.24  | 2.4  |
| 8.03 | 2.52  | 11.77 | 7.23  | 6.04 | 11.12 | 9.87  | 10.02 | 6.19 |
| 8.07 | 7.68  | 7.83  | 8.79  | 7.45 | 10.56 | 7.85  | 8.68  | 7.37 |
| 5.8  | 7.69  | 10.12 | 8.81  | 6.77 | 9.41  | 8.06  | 8.55  | 7.68 |
| 3.78 | 7.29  | 9.43  | 8.59  | 6.59 | 9.06  | 7.74  | 8.21  | 7.64 |
| 6.63 | 9.14  | 7.89  | 8.22  | 6.95 | 9.5   | 8.08  | 8.13  | 5.48 |

<https://mc.manuscriptcentral.com/gut>

1  
2  
3  
4  
5  
6  
7  
8  
9  
10  
11  
12  
13  
14  
15  
16  
17  
18  
19  
20  
21  
22  
23  
24  
25  
26  
27  
28  
29  
30  
31  
32  
33  
34  
35  
36  
37  
38  
39  
40  
41  
42  
43  
44  
45  
46  
47  
48  
49  
50  
51  
52  
53  
54  
55  
56  
57  
58  
59  
60

|       |       |       |       |      |       |       |       |      |
|-------|-------|-------|-------|------|-------|-------|-------|------|
| 5.59  | 9.54  | 10.56 | 8.13  | 6.12 | 9.14  | 8.2   | 7.68  | 5.31 |
| 4.03  | 8.3   | 8.01  | 8.83  | 7.6  | 8.29  | 8.99  | 7.76  | 6.7  |
| 10.02 | 7.68  | 7.03  | 6.97  | 6.48 | 12.48 | 8.11  | 8.89  | 8.37 |
| 6.31  | 9.33  | 11.17 | 7.09  | 5.69 | 10.23 | 8.89  | 8.25  | 5.78 |
| 6.16  | 8.13  | 8.51  | 6.08  | 5.85 | 10.26 | 9.12  | 8.66  | 6.44 |
| 9.01  | 0.41  | 10.63 | 6.26  | 7.75 | 11.81 | 9.9   | 9.81  | 7.6  |
| 5.19  | 1.13  | 12.28 | 5.01  | 4.8  | 9.59  | 9.85  | 7.64  | 3.8  |
| 6.18  | 3.34  | 11.66 | 5.43  | 4.71 | 9.75  | 9.55  | 8.33  | 5.43 |
| 8.11  | 2.49  | 11.05 | 7.08  | 7.35 | 10.39 | 11.75 | 10.23 | 6.49 |
| 7.48  | 9.04  | 7.68  | 4.88  | 6.65 | 10.94 | 9.93  | 8.91  | 7.18 |
| 5.53  | 11.05 | 9.83  | 3.66  | 5.7  | 9.96  | 9.7   | 8.04  | 4.3  |
| 5.28  | 10.44 | 8.72  | 8.18  | 6.45 | 8.81  | 9.05  | 7.29  | 4.7  |
| 6.65  | 9.42  | 9.61  | 4.26  | 7.12 | 9.78  | 11.74 | 9.05  | 7.39 |
| 0.2   | 9.97  | 7.68  | 10.88 | 7.85 | 8.76  | 9.1   | 7.64  | 7.28 |
| 1.53  | 5.19  | 10.75 | 5.95  | 4.85 | 7.6   | 8.54  | 7.48  | 4.99 |
| 3.54  | 5.81  | 10.85 | 3.74  | 4.42 | 8.01  | 8.6   | 6.93  | 3.74 |
| 3.69  | 6.76  | 7.99  | 5.56  | 4.43 | 8.38  | 8.64  | 7.62  | 5.98 |
| 8.02  | 8.39  | 9.86  | 5.76  | 7.28 | 10.28 | 8.88  | 8.89  | 5.32 |
| 6.98  | 5.63  | 8.79  | 7.72  | 7.1  | 9.24  | 8.61  | 8.1   | 6.21 |
| 7.43  | 4.82  | 9.65  | 6.97  | 7.09 | 10.32 | 8.72  | 9.49  | 7.02 |
| 6.75  | 6.16  | 8.33  | 7.49  | 8.33 | 7.97  | 13.34 | 8.49  | 5.16 |
| 7.67  | 7.62  | 13.04 | 6.19  | 4.53 | 9.29  | 8.88  | 7.04  | 3.46 |
| 9.49  | 8.91  | 10.71 | 6.78  | 6.24 | 10.57 | 8.97  | 8.61  | 6.51 |
| 5.27  | 5.99  | 6.88  | 3.5   | 5.27 | 8.35  | 10.21 | 7.35  | 6.27 |
| 6.19  | 6.79  | 6.63  | 4.23  | 5.76 | 8.67  | 10.72 | 8.7   | 6.26 |
| 6.69  | 4.71  | 8.13  | 4.24  | 5.5  | 9.49  | 9.06  | 8.94  | 9.56 |
| 3     | 8.09  | 8.09  | 9.69  | 7.93 | 8.09  | 8.59  | 8.29  | 6.67 |
| 1.86  | 8.37  | 7.6   | 10.01 | 7.96 | 7.8   | 8.32  | 8.2   | 6.41 |
| 2.77  | 8.34  | 7.83  | 9.67  | 7.74 | 7.92  | 8.14  | 8.18  | 5.57 |
| 7.06  | 7.74  | 8.15  | 2.82  | 3.92 | 10.22 | 7.84  | 7.92  | 8    |
| 6.99  | 6.31  | 11.75 | 4.11  | 3.91 | 8.9   | 8.31  | 7.36  | 7.84 |
| 6.28  | 7.84  | 8.32  | 2.69  | 2.92 | 8.86  | 9.22  | 7.77  | 6.62 |
| 6.2   | 5.06  | 9.94  | 2.16  | 4.48 | 10.42 | 7.67  | 7.55  | 8.66 |
| 3.77  | 8.09  | 7.22  | 9     | 6.72 | 7.95  | 8.07  | 7.11  | 5.41 |
| 0.25  | 7.9   | 8.59  | 8.88  | 6.13 | 7.47  | 7.9   | 6.88  | 4.95 |
| 1.34  | 8.1   | 7.53  | 8.67  | 5.72 | 6.93  | 7.9   | 6.9   | 5.02 |
| 0.32  | 8.23  | 7.78  | 9.37  | 7.43 | 7.83  | 8.3   | 6.41  | 6.05 |
| 4.51  | 7.66  | 6.92  | 8.8   | 6.34 | 7.46  | 7.29  | 7.06  | 5.24 |
| 1.1   | 7.76  | 7.33  | 8.93  | 6.49 | 6.77  | 7.47  | 6.56  | 5.27 |
| 0.31  | 7.58  | 7.02  | 8.89  | 6.06 | 6.92  | 7.29  | 6.58  | 4.95 |
| 4     | 6.87  | 9.28  | 9.82  | 8.27 | 6.22  | 8.24  | 5.22  | 4.73 |
| 3.38  | 8.36  | 8.01  | 9.98  | 7.5  | 8.57  | 8.24  | 7.91  | 6.18 |
| 0     | 9.45  | 8.22  | 10.27 | 7.44 | 8.28  | 8.58  | 7.82  | 6.46 |
| 3.45  | 10.46 | 9.26  | 9.32  | 6.75 | 8.44  | 9.04  | 7.93  | 4.95 |
| 2.56  | 9.25  | 8.05  | 9.65  | 7.17 | 8.04  | 8.48  | 7.21  | 6.33 |
| 6.28  | 7.75  | 7.95  | 8.95  | 6.69 | 8.92  | 8.34  | 7.72  | 6.49 |
| 0.3   | 8.46  | 7.61  | 9.87  | 7.18 | 8.04  | 8.72  | 7.53  | 6.27 |
| 0.71  | 8.65  | 7.72  | 9.79  | 6.92 | 8.25  | 7.96  | 7.74  | 6.41 |
| 0     | 8.8   | 8.27  | 9.74  | 7.66 | 8.5   | 8.49  | 6.54  | 6.41 |
| 4.96  | 6.45  | 6.94  | 8.41  | 5.84 | 8.63  | 7.85  | 7.05  | 6.68 |
| 4.14  | 6.05  | 9.67  | 7.79  | 5.55 | 8.69  | 8.23  | 7.88  | 6.03 |
| 5.39  | 6.54  | 10.65 | 8.44  | 6.25 | 8.76  | 8     | 7.82  | 6.38 |

<https://mc.manuscriptcentral.com/gut>

|    |       |       |       |      |      |       |       |       |      |
|----|-------|-------|-------|------|------|-------|-------|-------|------|
| 1  |       |       |       |      |      |       |       |       |      |
| 2  | 6.08  | 6.71  | 7.31  | 8.65 | 6.29 | 9.2   | 8.04  | 7.96  | 6.88 |
| 3  | 7.64  | 10.77 | 9.73  | 7.99 | 6.84 | 11.29 | 10.27 | 8.69  | 7.74 |
| 4  | 4.78  | 10.72 | 11    | 8.63 | 6.55 | 10.31 | 10.29 | 8.06  | 6.61 |
| 5  | 3.33  | 10.98 | 11.31 | 8.5  | 6.65 | 9.3   | 10    | 7.06  | 6.26 |
| 6  | 4.31  | 10.99 | 10.78 | 8.45 | 6.6  | 9.66  | 10.12 | 8.03  | 6.61 |
| 7  | 8.4   | 7.57  | 8.78  | 8.4  | 7.56 | 11.37 | 9.36  | 8.72  | 8.27 |
| 8  | 8.06  | 8.72  | 11.15 | 6.89 | 7.15 | 10.96 | 10.94 | 9.6   | 6.93 |
| 9  | 7.26  | 7.72  | 11.35 | 6.93 | 6.17 | 10.7  | 10.35 | 8.88  | 6.11 |
| 10 | 8.81  | 6.39  | 8.97  | 6.5  | 7.73 | 11.25 | 10.85 | 10.09 | 9.2  |
| 11 | 6.19  | 11    | 11.47 | 7.01 | 6.01 | 10.79 | 10.07 | 7.96  | 8.57 |
| 12 | 5.75  | 10.05 | 10.61 | 7.41 | 6.19 | 11.09 | 9.6   | 9.17  | 7.76 |
| 13 | 6.47  | 10.09 | 13.91 | 7.84 | 6.24 | 10.8  | 9.71  | 9.47  | 6.84 |
| 14 | 5.15  | 10.36 | 10.37 | 6.86 | 5.97 | 10.86 | 9.79  | 8.43  | 7.57 |
| 15 | 6.25  | 7.85  | 8.23  | 7.77 | 6.06 | 9.97  | 8.31  | 8.66  | 6.27 |
| 16 | 4.6   | 9.74  | 9.81  | 4.42 | 5    | 9.92  | 8.96  | 8.53  | 4.79 |
| 17 | 5.64  | 8.15  | 8.21  | 7.77 | 6.08 | 9.96  | 9.02  | 8.82  | 7.45 |
| 18 | 8.76  | 2     | 9.27  | 4.52 | 6.96 | 11.74 | 8.26  | 9.57  | 8.58 |
| 19 | 6.55  | 9.94  | 11.99 | 5.91 | 4.47 | 9.96  | 9.48  | 8.23  | 5.42 |
| 20 | 5.98  | 8.25  | 12.31 | 6.4  | 6.13 | 10.97 | 8.98  | 8.9   | 7.76 |
| 21 | 7.79  | 2.25  | 6.97  | 4.02 | 5.95 | 11.14 | 9.15  | 8.42  | 7.53 |
| 22 | 4.19  | 1.87  | 13.21 | 4.75 | 4.97 | 9.26  | 8.67  | 7.61  | 3    |
| 23 | 2.29  | 0     | 10.8  | 3.29 | 5.67 | 9.08  | 9.11  | 6.66  | 2.65 |
| 24 | 6.46  | 8.4   | 8.46  | 7.91 | 6.15 | 10.97 | 9.63  | 8.16  | 6.32 |
| 25 | 5.88  | 8.66  | 8.68  | 8.01 | 5.79 | 10.91 | 9.29  | 8.02  | 5.1  |
| 26 | 5.15  | 6.61  | 9.77  | 5.74 | 6.96 | 10.62 | 11.15 | 9.19  | 7.79 |
| 27 | 9.35  | 3.17  | 6.22  | 4.36 | 6.55 | 11.11 | 5.65  | 9.09  | 7.17 |
| 28 | 7.39  | 7.85  | 8.6   | 5.55 | 5.38 | 9.81  | 7.22  | 8.27  | 5.25 |
| 29 | 6.81  | 3.93  | 7.84  | 5.16 | 5.09 | 8.64  | 6.21  | 8.39  | 3.93 |
| 30 | 7.73  | 6.48  | 7.73  | 1.9  | 6.36 | 9.19  | 5.81  | 8.54  | 4.9  |
| 31 | 1.76  | 7.34  | 6.76  | 8.66 | 6.8  | 6.89  | 7.15  | 7.49  | 5.46 |
| 32 | 0.72  | 6.93  | 7.92  | 8.24 | 6.58 | 6.45  | 7.72  | 7.23  | 5.24 |
| 33 | 0.88  | 7.33  | 7.01  | 8.67 | 6.77 | 6.91  | 7.48  | 7.28  | 5.97 |
| 34 | 1.96  | 7.51  | 6.71  | 8.43 | 6.71 | 6.71  | 7.24  | 7.28  | 5.76 |
| 35 | 6.88  | 7.86  | 9.32  | 7.6  | 5.34 | 9.8   | 8.27  | 7.58  | 5.22 |
| 36 | 5.42  | 7.26  | 8.88  | 8.17 | 6.2  | 8.64  | 8.24  | 7.46  | 5.25 |
| 37 | 0.77  | 6.9   | 10.03 | 8.15 | 6.05 | 8.87  | 7.89  | 7.31  | 5.47 |
| 38 | 2.17  | 6.43  | 10.54 | 7.96 | 5.96 | 9.22  | 7.93  | 7.82  | 6.52 |
| 39 | 11.74 | 0.35  | 7.95  | 4.88 | 7.11 | 13.74 | 6.38  | 9.93  | 7.83 |
| 40 | 6.46  | 9.42  | 8.77  | 6.71 | 6.11 | 10.25 | 8.68  | 7.61  | 5.05 |
| 41 | 8.64  | 11.65 | 10.58 | 5.51 | 6.65 | 10.22 | 9.48  | 9.45  | 4.88 |
| 42 | 9.76  | 10.46 | 10.38 | 5.4  | 8.14 | 11.28 | 11.83 | 10.72 | 7.19 |
| 43 | 6.26  | 6.19  | 7.02  | 7.74 | 6.24 | 9.94  | 8.64  | 7.57  | 7.11 |
| 44 | 8.9   | 8.83  | 10.32 | 6.1  | 7.51 | 10.64 | 11.05 | 10.1  | 6.51 |
| 45 | 5.89  | 7.09  | 8.51  | 4.96 | 4.82 | 9.66  | 9.02  | 8.16  | 7.21 |
| 46 | 3.94  | 6.27  | 7.39  | 3.1  | 4.89 | 9.9   | 8.78  | 8.05  | 7.56 |
| 47 | 2.27  | 5.38  | 6.73  | 3.27 | 3.85 | 7.53  | 6.79  | 5.54  | 0.68 |
| 48 | 7.84  | 6.39  | 9.48  | 6.98 | 6.96 | 10.05 | 7.48  | 8.88  | 7.09 |
| 49 | 7.45  | 6.83  | 8.38  | 4.08 | 6.16 | 9.47  | 7.25  | 7.85  | 6.6  |
| 50 | 7.67  | 7     | 8.24  | 7.96 | 6.43 | 9.53  | 7.42  | 8.71  | 6.76 |
| 51 | 6.16  | 5.13  | 11.46 | 6.23 | 5.46 | 11.99 | 8.39  | 8.05  | 7.87 |
| 52 | 4.7   | 6.08  | 9.83  | 7.64 | 5.48 | 10.04 | 8.08  | 7.19  | 6.31 |
| 53 | 5.23  | 6.43  | 10.43 | 7.96 | 4.96 | 10.1  | 7.96  | 7.14  | 6.34 |

<https://mc.manuscriptcentral.com/gut>

1  
2  
3  
4  
5  
6  
7  
8  
9  
10  
11  
12  
13  
14  
15  
16  
17  
18  
19  
20  
21  
22  
23  
24  
25  
26  
27  
28  
29  
30  
31  
32  
33  
34  
35  
36  
37  
38  
39  
40  
41  
42  
43  
44  
45  
46  
47  
48  
49  
50  
51  
52  
53  
54  
55  
56  
57  
58  
59  
60

|      |      |       |      |      |       |       |      |      |
|------|------|-------|------|------|-------|-------|------|------|
| 3.37 | 3.6  | 9.43  | 4.7  | 4.37 | 10.15 | 8.85  | 7.39 | 7.45 |
| 2.68 | 5.35 | 6.83  | 7.54 | 5.68 | 9.2   | 8.32  | 6.05 | 7.01 |
| 2.17 | 5.44 | 12.27 | 7.09 | 4.76 | 9.86  | 7.85  | 5.54 | 3.39 |
| 2.07 | 5.24 | 7.97  | 6.46 | 4.39 | 10.22 | 7.89  | 5.19 | 4.07 |
| 1.55 | 7.62 | 8.95  | 9.57 | 5.95 | 7.6   | 8.75  | 7.41 | 5.95 |
| 8.17 | 1.15 | 10.02 | 3.81 | 5.24 | 10.65 | 8.03  | 8.45 | 7.23 |
| 7.24 | 1.65 | 9.15  | 4.02 | 4.77 | 9.27  | 8.44  | 7.88 | 5.32 |
| 7.02 | 1.67 | 9.72  | 4.26 | 4.56 | 8.88  | 8.62  | 7.84 | 4.97 |
| 0.27 | 7.81 | 7.45  | 9.81 | 6.9  | 8.02  | 7.85  | 6.92 | 6.2  |
| 7.54 | 8.48 | 9.5   | 8.57 | 5.95 | 9.93  | 7.95  | 7.71 | 6.41 |
| 8.26 | 4.3  | 6.42  | 4.24 | 6.11 | 11.95 | 8.74  | 8.77 | 8.75 |
| 7.4  | 6.59 | 8.11  | 7.38 | 5.89 | 10.23 | 8.75  | 8.08 | 6.77 |
| 7.78 | 5.16 | 6.43  | 5.55 | 5.86 | 10.75 | 9.31  | 8.04 | 7.11 |
| 7.31 | 4.98 | 6.32  | 6.74 | 6.06 | 11    | 8.16  | 7.94 | 7.78 |
| 4.87 | 4.13 | 11.27 | 7    | 6.13 | 9.55  | 13.77 | 8.95 | 6.24 |
| 8.28 | 8.73 | 7.83  | 6.46 | 6.91 | 10.2  | 9.01  | 8.76 | 6.34 |
| 7.53 | 8.41 | 8.36  | 7.47 | 6.35 | 9.94  | 8.14  | 8.12 | 6.07 |
| 8.37 | 8.54 | 7.34  | 6.02 | 6.76 | 10.03 | 9.23  | 8.86 | 6.55 |

1  
2  
3  
4  
5  
6  
7  
8  
9  
10  
11  
12  
13  
14  
15  
16  
17  
18  
19  
20  
21  
22  
23  
24  
25  
26  
27  
28  
29  
30  
31  
32  
33  
34  
35  
36  
37  
38  
39  
40  
41  
42  
43  
44  
45  
46  
47  
48  
49  
50  
51  
52  
53  
54  
55  
56  
57  
58  
59  
60

| DAG1 | DCC  | DCN   | DDR2 | DENND5A | DENR | DES11 | DICER1 | DLC1 |
|------|------|-------|------|---------|------|-------|--------|------|
| 7.52 | 0.56 | 9.77  | 7.73 | 6.77    | 7.62 | 7.19  | 8.63   | 5.85 |
| 8.15 | 1.42 | 9.91  | 7.61 | 6.82    | 7.83 | 7.89  | 8.74   | 6.67 |
| 7.92 | 0.08 | 10    | 7.33 | 6.59    | 7.86 | 7.66  | 8.86   | 6.15 |
| 8.58 | 2.76 | 11.56 | 8.16 | 7.17    | 7.53 | 7.59  | 9.35   | 7.1  |
| 8.14 | 2.01 | 7.33  | 8.71 | 7.78    | 7.62 | 7.1   | 8.87   | 6.59 |
| 8.41 | 1.08 | 10.1  | 8.2  | 6.74    | 7.79 | 7.06  | 8.4    | 6.42 |
| 8.42 | 1.5  | 10.21 | 7.9  | 6.96    | 7.69 | 7.32  | 8.37   | 6.09 |
| 9.46 | 0.39 | 10.51 | 7.48 | 6.82    | 7.14 | 6.75  | 9.4    | 6.7  |
| 9.23 | 1.37 | 10.16 | 7.68 | 6.71    | 7.13 | 6.94  | 8.99   | 6.56 |
| 8.54 | 0.91 | 9.78  | 7.66 | 6.23    | 7.73 | 7.07  | 8.21   | 5.89 |
| 8.92 | 0.38 | 10.16 | 7.73 | 6.51    | 8.07 | 7.21  | 8.46   | 6.72 |
| 8.54 | 2.27 | 11.19 | 8.42 | 7.27    | 8.09 | 7.35  | 8.57   | 7.34 |
| 7.97 | 1.18 | 10.15 | 7.6  | 6.59    | 8.62 | 7.98  | 8.98   | 6.12 |
| 7.81 | 0    | 11.36 | 8.47 | 7       | 8.36 | 8.06  | 9.05   | 6.64 |
| 7.92 | 1.77 | 11.37 | 6.58 | 6.63    | 6.72 | 7.13  | 10.55  | 7.23 |
| 8.37 | 0.94 | 10.45 | 8.06 | 7.45    | 7.59 | 7.09  | 9.4    | 6.78 |
| 8.69 | 2.29 | 11.07 | 8.58 | 7.56    | 7.9  | 6.99  | 9.38   | 5.93 |
| 9.02 | 2.35 | 11.04 | 8.31 | 7.91    | 7.52 | 6.89  | 9.42   | 6.81 |
| 8.12 | 0    | 10.46 | 7.14 | 6.76    | 7.44 | 7.29  | 10.24  | 7.23 |
| 8.37 | 1.89 | 10.57 | 8.09 | 6.47    | 8.62 | 8.15  | 9.35   | 7.05 |
| 8.21 | 2.08 | 10.73 | 8.63 | 7.16    | 8.25 | 7.98  | 9.61   | 7.5  |
| 8.4  | 1.15 | 11.65 | 8.56 | 7.17    | 8.84 | 8.1   | 9.24   | 7.09 |
| 8.53 | 2.2  | 11.64 | 8.14 | 7.16    | 8.94 | 7.91  | 9.42   | 7.11 |
| 8.52 | 1.89 | 11.87 | 9.19 | 7.52    | 8.59 | 8.01  | 9.14   | 7.04 |
| 8.38 | 0.43 | 9.19  | 6.64 | 7.21    | 8.43 | 8.73  | 9.07   | 7.1  |
| 9.34 | 0.13 | 9.01  | 6.38 | 5.3     | 8.98 | 8.32  | 8.89   | 6.13 |
| 9.41 | 1.52 | 9.29  | 6.43 | 5.61    | 8.73 | 8.18  | 8.92   | 5.73 |
| 9.03 | 1.5  | 9.59  | 7.19 | 6.39    | 8.21 | 8.1   | 8.99   | 6.09 |
| 7.31 | 0.7  | 7.65  | 6.91 | 6.31    | 8.8  | 7.47  | 8.96   | 5.76 |
| 8.01 | 1.77 | 9.66  | 7.85 | 6.55    | 7.84 | 7.51  | 9.07   | 6.16 |
| 7.71 | 1.78 | 8.85  | 7.36 | 6.08    | 8.5  | 7.5   | 8.94   | 6.08 |
| 7.7  | 0.71 | 9.3   | 7.7  | 7.01    | 7.74 | 7.17  | 9.08   | 6.2  |
| 7.38 | 0.35 | 9.06  | 7.98 | 6.96    | 7.46 | 7.47  | 9      | 6.72 |
| 8.96 | 1.06 | 11.75 | 9.38 | 7       | 8.11 | 7.35  | 9.33   | 7.04 |
| 9.01 | 0.61 | 10.53 | 7.58 | 6.3     | 8.48 | 7.33  | 9.41   | 6.6  |
| 8.89 | 2.06 | 11.46 | 8.79 | 6.85    | 7.69 | 6.88  | 9.61   | 6.99 |
| 6.73 | 0.45 | 8.3   | 6.2  | 6.45    | 7.17 | 6.92  | 9.01   | 6.45 |
| 7.31 | 1.73 | 10.54 | 7.38 | 6.54    | 7.98 | 7.27  | 8.99   | 5.38 |
| 6.78 | 1.95 | 10.76 | 7.26 | 6.58    | 7.51 | 7.13  | 8.88   | 6.09 |
| 6.8  | 0.74 | 10.48 | 7.64 | 6.64    | 7.65 | 7.24  | 8.98   | 5.6  |
| 7.48 | 1.51 | 8.93  | 7.27 | 6.93    | 7.1  | 6.44  | 8.19   | 5.62 |
| 8.19 | 1.9  | 9.66  | 7.86 | 6.41    | 7.53 | 6.57  | 7.77   | 5.78 |
| 7.88 | 1.8  | 9.16  | 7.45 | 6.47    | 7.12 | 7.06  | 7.86   | 5.43 |
| 8.57 | 1.4  | 9.71  | 7.2  | 5.96    | 7.28 | 6.82  | 7.35   | 5.17 |
| 8.15 | 2.86 | 7.32  | 4.86 | 4.86    | 5.45 | 3.86  | 10.05  | 6.03 |
| 7.84 | 2.9  | 10.68 | 7.56 | 6.46    | 7.88 | 7.54  | 8.58   | 5.6  |
| 8.38 | 1.58 | 11.48 | 7.89 | 6.67    | 7.81 | 7.8   | 8.67   | 6.49 |
| 7.96 | 0    | 12.38 | 8.92 | 7.19    | 7.69 | 7.32  | 8.68   | 7.3  |
| 8.21 | 2.63 | 11.26 | 7.61 | 8.45    | 8.52 | 7.63  | 9.2    | 6.96 |
| 8.98 | 2.01 | 11.16 | 7.93 | 8.9     | 9.06 | 8.11  | 8.91   | 6.5  |
| 8.9  | 2.08 | 10.63 | 7.1  | 8.88    | 9.3  | 8.3   | 8.87   | 6.2  |

<https://mc.manuscriptcentral.com/gut>

## Gut

1  
2  
3  
4  
5  
6  
7  
8  
9  
10  
11  
12  
13  
14  
15  
16  
17  
18  
19  
20  
21  
22  
23  
24  
25  
26  
27  
28  
29  
30  
31  
32  
33  
34  
35  
36  
37  
38  
39  
40  
41  
42  
43  
44  
45  
46  
47  
48  
49  
50  
51  
52  
53  
54  
55  
56  
57  
58  
59  
60

|      |      |       |       |      |      |      |      |      |
|------|------|-------|-------|------|------|------|------|------|
| 8.89 | 2.08 | 11.29 | 8.59  | 8.67 | 8.99 | 8.06 | 9.18 | 6.86 |
| 8.66 | 1.03 | 8.86  | 7.15  | 7.34 | 8.45 | 7.41 | 9.39 | 5.81 |
| 8.66 | 1.77 | 10.08 | 7.67  | 7.29 | 8.72 | 7.86 | 9.53 | 6.19 |
| 8.56 | 1.54 | 10.18 | 7.44  | 6.87 | 8.8  | 8.21 | 9.34 | 6.24 |
| 8.48 | 0    | 10.22 | 7.99  | 7.17 | 8.49 | 7.83 | 9.36 | 6.48 |
| 8.42 | 2.55 | 9.73  | 7.61  | 7.6  | 8.75 | 7.65 | 9.13 | 6.3  |
| 9.23 | 2.57 | 10.52 | 7.3   | 6.8  | 9.15 | 8.11 | 8.97 | 6.18 |
| 9.47 | 1.32 | 9.03  | 6.45  | 6.29 | 8.94 | 7.89 | 8.81 | 5.05 |
| 9.02 | 2.02 | 10.7  | 8.49  | 6.98 | 8.66 | 7.87 | 9.04 | 6.55 |
| 7.72 | 1.17 | 9.56  | 6.62  | 6.55 | 8.37 | 7.52 | 8.87 | 4.97 |
| 7.79 | 0.54 | 10.25 | 7.14  | 6.54 | 8.55 | 7.83 | 9.3  | 5.71 |
| 7.91 | 1.4  | 10.01 | 6.92  | 6.37 | 8.97 | 7.73 | 9.06 | 5.52 |
| 7.56 | 1.56 | 10.47 | 8.1   | 6.32 | 8.45 | 7.59 | 9.08 | 5.79 |
| 8.61 | 5.15 | 7.47  | 8.96  | 7.74 | 6.15 | 7.15 | 9.61 | 6.15 |
| 8.52 | 4.37 | 9.07  | 8.78  | 8.2  | 7.25 | 6.43 | 9.47 | 6.74 |
| 8.33 | 2.98 | 9.33  | 8.2   | 7.35 | 8.12 | 6.96 | 8.87 | 6.2  |
| 9.26 | 1.24 | 8.33  | 10.11 | 8.94 | 7.23 | 6.93 | 9.11 | 8.05 |
| 9.07 | 1.77 | 7.94  | 9.68  | 9.15 | 7.48 | 6.5  | 9.37 | 7.6  |
| 8.38 | 2.46 | 8.17  | 6.88  | 6.18 | 8.84 | 7.42 | 8.75 | 6.75 |
| 8.35 | 0.85 | 7.35  | 6.49  | 6.07 | 8.77 | 7.36 | 8.79 | 6.56 |
| 8.3  | 0    | 8.86  | 7     | 6.47 | 8.43 | 7.38 | 9.04 | 6.73 |
| 8.27 | 0.68 | 11.89 | 8.55  | 6.82 | 8.84 | 7.84 | 9.46 | 6.61 |
| 8.33 | 1.28 | 11.62 | 8.44  | 6.88 | 8.87 | 7.9  | 9.45 | 6.34 |
| 7.42 | 1.05 | 11.6  | 8.65  | 7.33 | 8.72 | 7.6  | 9.36 | 6.96 |
| 8.85 | 3.22 | 11.04 | 8.19  | 7.34 | 8.66 | 8.51 | 9.76 | 6.36 |
| 8.84 | 2.36 | 11.78 | 8.76  | 7.61 | 8.64 | 8.43 | 9.88 | 6.86 |
| 8.82 | 1.69 | 11.35 | 9.42  | 7.61 | 8.66 | 8.28 | 9.86 | 7.05 |
| 7.41 | 1.94 | 9.51  | 7.94  | 7.36 | 8.8  | 7.78 | 9.69 | 5.4  |
| 7.4  | 2.56 | 9.62  | 8.38  | 7.92 | 8.92 | 7.59 | 9.6  | 5.96 |
| 7.54 | 2.15 | 9.55  | 8.23  | 7.42 | 8.82 | 7.86 | 9.52 | 6.04 |
| 8.37 | 2.44 | 10.76 | 8.3   | 7.08 | 8.36 | 8.1  | 9.5  | 7.1  |
| 8.29 | 2.78 | 9.28  | 8.17  | 6.98 | 8.34 | 7.99 | 9.44 | 6.11 |
| 8.27 | 1.99 | 9.29  | 7.78  | 7.18 | 8.1  | 7.91 | 9.32 | 6.35 |
| 8.26 | 1.31 | 10.58 | 8.71  | 7.37 | 8.05 | 7.75 | 9.16 | 6.47 |
| 8.35 | 0    | 10.52 | 8.13  | 7.25 | 8.25 | 7.58 | 9.22 | 6.24 |
| 8.35 | 0    | 11.43 | 8.88  | 7.79 | 8.06 | 7.37 | 9.3  | 6.85 |
| 7.65 | 0.44 | 10.69 | 8.46  | 7.33 | 7.65 | 7.23 | 9.13 | 6.78 |
| 7.65 | 0.44 | 10.69 | 8.46  | 7.33 | 7.65 | 7.23 | 9.13 | 6.78 |
| 8.18 | 2.15 | 10.79 | 8.66  | 7.38 | 7.52 | 7.01 | 9.06 | 6.47 |
| 7.95 | 2.18 | 10.86 | 8.86  | 7.41 | 7.68 | 7.46 | 9.04 | 6.98 |
| 7.82 | 0    | 11.87 | 9.31  | 7.41 | 7.91 | 7.17 | 8.98 | 6.86 |
| 7.49 | 1.56 | 8.34  | 8.05  | 6.89 | 7.53 | 7.6  | 8.88 | 6.64 |
| 8.05 | 1.3  | 10.42 | 8.3   | 7.42 | 7.76 | 7.36 | 9.11 | 6.84 |
| 7.77 | 1.95 | 9.75  | 8.01  | 7    | 7.88 | 7.38 | 8.88 | 6.42 |
| 7.86 | 0.61 | 10.33 | 8.7   | 7.17 | 7.59 | 7.35 | 9    | 6.47 |
| 8.71 | 0    | 11.15 | 7.9   | 6.4  | 8.4  | 7.44 | 9.29 | 6.66 |
| 8.65 | 1.66 | 9.97  | 6.82  | 5.91 | 8.4  | 7.41 | 9.11 | 6.84 |
| 8.43 | 1.52 | 11.23 | 7.2   | 6.73 | 7.77 | 6.94 | 9.7  | 6.82 |
| 7.64 | 0.15 | 9.57  | 7.93  | 6.8  | 7.7  | 7.53 | 8.74 | 6.71 |
| 7.87 | 1.02 | 11.48 | 9.17  | 7.19 | 7.75 | 7.5  | 8.84 | 7.32 |
| 7.58 | 0.46 | 11.53 | 9.53  | 7.31 | 7.82 | 7.41 | 8.95 | 6.69 |
| 8.15 | 1.98 | 9.6   | 7.95  | 6.33 | 7.7  | 7.33 | 8.55 | 6.74 |

<https://mc.manuscriptcentral.com/gut>

1  
2  
3  
4  
5  
6  
7  
8  
9  
10  
11  
12  
13  
14  
15  
16  
17  
18  
19  
20  
21  
22  
23  
24  
25  
26  
27  
28  
29  
30  
31  
32  
33  
34  
35  
36  
37  
38  
39  
40  
41  
42  
43  
44  
45  
46  
47  
48  
49  
50  
51  
52  
53  
54  
55  
56  
57  
58  
59  
60

|      |      |       |      |      |      |      |       |      |
|------|------|-------|------|------|------|------|-------|------|
| 8.59 | 0    | 9.84  | 8.33 | 6.33 | 7.98 | 7.62 | 8.39  | 6.85 |
| 8.3  | 0.78 | 9.12  | 8.71 | 7.04 | 7.32 | 7.03 | 8.92  | 7.51 |
| 8.18 | 0.25 | 10.62 | 7.99 | 6.77 | 7.63 | 7.16 | 9.19  | 6.63 |
| 8.56 | 2.66 | 11.91 | 8.9  | 7.02 | 8.02 | 7.94 | 9.64  | 6.52 |
| 8.44 | 1.49 | 12.93 | 9.66 | 7.4  | 7.48 | 8.06 | 9.33  | 7.09 |
| 7.66 | 1.99 | 11.05 | 7.56 | 6.76 | 8.19 | 6.85 | 9.84  | 6.6  |
| 8.44 | 1.13 | 10.42 | 7.77 | 6.1  | 8.37 | 6.88 | 9.72  | 5.68 |
| 8.61 | 0.76 | 10.61 | 8.07 | 6.63 | 8.77 | 6.93 | 9.75  | 6.02 |
| 9.14 | 2.49 | 10.63 | 7.54 | 6.66 | 6.4  | 5.95 | 11.56 | 6.3  |
| 8.16 | 1.79 | 9.75  | 6.6  | 5.79 | 7.18 | 6    | 9.59  | 6.86 |
| 8.49 | 2.49 | 9.59  | 6.79 | 5.95 | 8.24 | 6.01 | 9.03  | 6.11 |
| 7.97 | 1.48 | 8.67  | 7.57 | 6.28 | 7.94 | 6.35 | 8.82  | 5.21 |
| 8.64 | 3.85 | 10.72 | 6.65 | 6.17 | 6.58 | 5.58 | 10.72 | 6.58 |
| 8.73 | 0.2  | 7.61  | 9.31 | 7.9  | 7.83 | 8.95 | 9.52  | 6.91 |
| 8.92 | 0    | 9.8   | 7.4  | 5.85 | 8.33 | 9.92 | 8.39  | 6.01 |
| 9.05 | 1.42 | 9.47  | 6.92 | 4.96 | 8.55 | 9.98 | 8.61  | 5.98 |
| 8.96 | 0    | 9.63  | 7.55 | 5.65 | 8.14 | 9.63 | 8.46  | 5.82 |
| 7.35 | 2.43 | 10.5  | 7.72 | 6.16 | 8.35 | 7.61 | 8.85  | 5.68 |
| 7.54 | 0.35 | 10.3  | 8.12 | 6.52 | 7.61 | 6.67 | 8.25  | 5.73 |
| 7.7  | 0.98 | 10.25 | 8.18 | 6.68 | 7.96 | 6.9  | 8.6   | 6.02 |
| 7.16 | 5.16 | 6.75  | 7.75 | 5.16 | 6.75 | 5.16 | 11.59 | 5.16 |
| 8.61 | 1.13 | 9.38  | 6.63 | 6.72 | 8.74 | 7.54 | 8.06  | 5.4  |
| 8.5  | 1.54 | 10.04 | 7.48 | 6.49 | 8.26 | 7.3  | 8.63  | 5.34 |
| 8.7  | 2.18 | 10.8  | 7.33 | 6.54 | 7.06 | 6.61 | 9.59  | 6.54 |
| 8.96 | 2.91 | 10.91 | 7.43 | 6.26 | 6.55 | 5.76 | 9.98  | 6.66 |
| 8.68 | 3.35 | 12.14 | 8.37 | 6.69 | 7.31 | 7.21 | 9.37  | 6.92 |
| 7.84 | 1    | 7.82  | 8.52 | 7.28 | 7.02 | 7.5  | 9.11  | 6.32 |
| 7.83 | 0.86 | 6.88  | 8.37 | 7.35 | 7.52 | 7.16 | 9.22  | 6.32 |
| 7.92 | 1.77 | 7.02  | 8.29 | 7.05 | 7.32 | 7.55 | 9.22  | 6.29 |
| 7.16 | 1.01 | 11.22 | 7.79 | 5.84 | 7.22 | 7.01 | 8.15  | 6.52 |
| 6.76 | 0    | 12    | 9.13 | 6.23 | 6.73 | 6.89 | 8.28  | 6.76 |
| 7.54 | 1.11 | 10.94 | 7.93 | 5.97 | 6.99 | 6.93 | 8.96  | 6.36 |
| 7.06 | 0.16 | 12.35 | 8.58 | 6.66 | 6.9  | 6.98 | 8.43  | 7.5  |
| 7.37 | 0.45 | 6.99  | 7.82 | 6.88 | 7.02 | 6.36 | 8.35  | 5.58 |
| 6.63 | 0.25 | 6.57  | 7.1  | 6.4  | 6.64 | 6.34 | 8.16  | 5.42 |
| 6.8  | 1.34 | 7.24  | 6.9  | 5.91 | 6.31 | 6.15 | 7.83  | 5.1  |
| 7.55 | 0    | 6.94  | 8.57 | 7.68 | 7.22 | 6.16 | 8.2   | 6.43 |
| 7.24 | 1.34 | 6.62  | 7.76 | 6.04 | 6.83 | 6.83 | 8.23  | 5.24 |
| 7.25 | 1.1  | 7.05  | 7.47 | 6.65 | 6.74 | 7.1  | 8.03  | 5.68 |
| 6.88 | 0.31 | 7.64  | 7.6  | 6.52 | 6.59 | 6.54 | 7.81  | 5.7  |
| 7.05 | 2.41 | 7.5   | 9.23 | 9.42 | 6.11 | 4.41 | 6.22  | 6.22 |
| 8.07 | 2.64 | 7.63  | 8.39 | 7.26 | 7.41 | 7.4  | 8.93  | 6.55 |
| 8.25 | 0    | 7.41  | 8.52 | 7.72 | 7.96 | 7.84 | 9.48  | 6.61 |
| 8.25 | 0.87 | 7.84  | 7.31 | 6.48 | 6.98 | 6.67 | 8.96  | 5.82 |
| 8.04 | 0    | 7.33  | 8.3  | 7.33 | 7.56 | 7.19 | 8.98  | 6.5  |
| 7.82 | 0.88 | 9.13  | 8.12 | 7.19 | 7.36 | 6.78 | 8.35  | 6.11 |
| 7.69 | 0.3  | 7.83  | 8.64 | 7.41 | 7.74 | 7.48 | 8.36  | 5.88 |
| 7.5  | 0.71 | 7.31  | 8.81 | 7.39 | 7.9  | 7.94 | 8.53  | 6.26 |
| 8.07 | 1.48 | 8.26  | 9.43 | 7.65 | 8.47 | 7.37 | 8.37  | 6.79 |
| 6.89 | 1.5  | 9.26  | 7.32 | 6.47 | 7.81 | 7.51 | 8.06  | 5.64 |
| 7.15 | 0    | 9.54  | 7.63 | 6.81 | 8.01 | 7.7  | 8.25  | 5.03 |
| 7.16 | 0.04 | 9.41  | 7.65 | 7.07 | 7.97 | 7.78 | 8.16  | 5.59 |

<https://mc.manuscriptcentral.com/gut>

1  
2  
3  
4  
5  
6  
7  
8  
9  
10  
11  
12  
13  
14  
15  
16  
17  
18  
19  
20  
21  
22  
23  
24  
25  
26  
27  
28  
29  
30  
31  
32  
33  
34  
35  
36  
37  
38  
39  
40  
41  
42  
43  
44  
45  
46  
47  
48  
49  
50  
51  
52  
53  
54  
55  
56  
57  
58  
59  
60

|      |      |       |      |      |      |      |       |      |
|------|------|-------|------|------|------|------|-------|------|
| 6.74 | 0.27 | 9.76  | 7.78 | 7.01 | 8    | 7.71 | 8.18  | 5.52 |
| 9.09 | 1.52 | 10.67 | 8.32 | 7.41 | 9.19 | 7.4  | 9.87  | 6.76 |
| 9.05 | 1.65 | 10.72 | 8.41 | 7.56 | 9.07 | 7.62 | 9.55  | 7.18 |
| 8.87 | 2.33 | 9.2   | 7.94 | 6.67 | 9.19 | 6.95 | 9.79  | 6.17 |
| 8.93 | 1.27 | 9.33  | 7.94 | 6.91 | 9.21 | 7.02 | 9.69  | 6.13 |
| 8.5  | 2.09 | 10.81 | 8.51 | 7.59 | 8.15 | 7.69 | 9.02  | 7.13 |
| 9.14 | 2.84 | 11.37 | 7.72 | 7.03 | 8    | 7.76 | 9.96  | 7.35 |
| 8.93 | 2.79 | 10.62 | 7.82 | 6.87 | 8.19 | 8.08 | 9.92  | 6.92 |
| 8.81 | 1.74 | 12.17 | 8.7  | 7.52 | 7.2  | 7.22 | 10.33 | 7.76 |
| 8.26 | 0.76 | 10.24 | 8.17 | 7.48 | 8.48 | 7.94 | 9.2   | 7.09 |
| 9.03 | 2.49 | 10.85 | 8.93 | 7.63 | 9.05 | 7.73 | 9.2   | 7.14 |
| 8.94 | 1.97 | 11.48 | 8.94 | 7.51 | 9.02 | 7.71 | 9.32  | 7.1  |
| 8.97 | 1.65 | 10.38 | 8.71 | 7.34 | 8.96 | 7.86 | 9.21  | 6.92 |
| 8.18 | 1.48 | 9.24  | 7.38 | 6.21 | 8.02 | 7.26 | 8.87  | 5.8  |
| 8.42 | 2.09 | 10.35 | 7.52 | 6.4  | 8.56 | 7.58 | 9.18  | 5.98 |
| 8.41 | 2.15 | 10.87 | 8.87 | 6.94 | 7.43 | 6.65 | 9.77  | 6.76 |
| 7.59 | 2.58 | 11.28 | 8.02 | 7.05 | 7.98 | 7.51 | 9.1   | 6.19 |
| 8.57 | 2.67 | 11.29 | 8.06 | 6.28 | 8.32 | 7.82 | 9.12  | 6.19 |
| 8.27 | 0.52 | 11.34 | 9.36 | 7.53 | 7.91 | 7.69 | 9.09  | 7.18 |
| 8.08 | 0.93 | 11.26 | 7.24 | 5.97 | 8.06 | 7.4  | 8.67  | 6.34 |
| 7.92 | 0    | 11.4  | 8.36 | 6.88 | 8.87 | 8.43 | 8.55  | 6.19 |
| 7.99 | 0    | 9.86  | 6.62 | 5.95 | 8.62 | 8.13 | 8.58  | 5.57 |
| 8.14 | 4.28 | 11.1  | 8.32 | 6.81 | 7.37 | 7.61 | 8.77  | 7.19 |
| 8.3  | 3.25 | 10.74 | 8.21 | 7.02 | 7.12 | 7.57 | 8.6   | 6.66 |
| 8.61 | 5.15 | 11.79 | 8.32 | 7.54 | 3.15 | 6.32 | 10.06 | 8.36 |
| 5.92 | 0.36 | 9.39  | 6.45 | 5.98 | 6.84 | 6.93 | 8.62  | 5.57 |
| 6.57 | 1.79 | 10.25 | 7.49 | 5.65 | 6.6  | 6.84 | 8.41  | 5.92 |
| 7    | 0    | 9.8   | 6.89 | 5.65 | 7.33 | 7.29 | 8.15  | 5.55 |
| 6.85 | 1.9  | 11.45 | 8.78 | 7.03 | 7.65 | 6.42 | 8.17  | 6.71 |
| 6.85 | 2.76 | 6.46  | 6.76 | 6.62 | 6.89 | 6.8  | 8.31  | 5.85 |
| 7.02 | 0.72 | 8.09  | 7.24 | 5.89 | 6.99 | 6.39 | 8.32  | 5.58 |
| 7.24 | 0.88 | 6.41  | 7.5  | 6.09 | 7.09 | 7.09 | 7.95  | 6.13 |
| 7.28 | 0.96 | 6.98  | 7.22 | 6.51 | 7.22 | 6.81 | 8.26  | 5.6  |
| 7.46 | 0    | 7.74  | 6.34 | 5.82 | 6.79 | 6.22 | 8.03  | 5.36 |
| 7.24 | 0.66 | 8.74  | 7.28 | 6.25 | 6.75 | 6.25 | 7.92  | 6    |
| 7.07 | 0    | 9.18  | 7.7  | 6.05 | 6.62 | 6.16 | 8.04  | 5.79 |
| 7.06 | 0.17 | 10.42 | 7.77 | 6.42 | 6.75 | 6.36 | 8     | 6.14 |
| 6.21 | 0.35 | 9.23  | 7.38 | 7.25 | 7.85 | 7.33 | 9.24  | 5.88 |
| 7.75 | 2.46 | 10.49 | 8.11 | 5.92 | 7.24 | 7.53 | 8.58  | 6.67 |
| 9.06 | 3.74 | 9.69  | 6.67 | 6    | 8.19 | 7.43 | 9.36  | 6.06 |
| 9.16 | 3.23 | 9.63  | 5.93 | 5.82 | 6.76 | 5.93 | 10.65 | 5.82 |
| 8.01 | 0    | 9.78  | 7.31 | 6.51 | 7.62 | 7.32 | 8.59  | 6.24 |
| 8.97 | 6.83 | 10.13 | 7.1  | 6.83 | 7.1  | 4.51 | 11.05 | 7.32 |
| 8.23 | 3.19 | 11.1  | 8.22 | 6.31 | 8.42 | 7.6  | 9.06  | 6.12 |
| 8.21 | 0    | 11.71 | 8.92 | 6.66 | 8.17 | 7.55 | 8.95  | 6.5  |
| 7.88 | 0.68 | 3     | 4.38 | 5.73 | 8.65 | 7.33 | 8.5   | 3    |
| 8.19 | 0.98 | 10.05 | 7.73 | 6.94 | 7.94 | 7.13 | 8.92  | 6.17 |
| 8.33 | 1.28 | 10.12 | 7.51 | 6.49 | 7.96 | 7.21 | 8.69  | 5.49 |
| 7.91 | 0.26 | 9.78  | 7.62 | 7.02 | 7.82 | 7.39 | 8.83  | 5.5  |
| 6.44 | 0.57 | 10.34 | 7    | 6.61 | 7.07 | 6.99 | 8.11  | 6.93 |
| 6.76 | 0.53 | 10.85 | 8.07 | 6.26 | 7.11 | 6.87 | 7.9   | 5.95 |
| 6.37 | 2.16 | 10.63 | 7.54 | 6.29 | 6.33 | 6.52 | 7.88  | 6.06 |

<https://mc.manuscriptcentral.com/gut>



1  
2  
3  
4  
5  
6  
7  
8  
9  
10  
11  
12  
13  
14  
15  
16  
17  
18  
19  
20  
21  
22  
23  
24  
25  
26  
27  
28  
29  
30  
31  
32  
33  
34  
35  
36  
37  
38  
39  
40  
41  
42  
43  
44  
45  
46  
47  
48  
49  
50  
51  
52  
53  
54  
55  
56  
57  
58  
59  
60

|      |      |       |      |      |      |      |       |      |
|------|------|-------|------|------|------|------|-------|------|
| 6.57 | 1.79 | 11.01 | 8.18 | 6.15 | 6.25 | 6.43 | 8.37  | 6.79 |
| 7.53 | 1.1  | 10.62 | 7.97 | 6.68 | 5.91 | 6.56 | 7.83  | 6.35 |
| 6.87 | 0.59 | 9.92  | 6.76 | 6.42 | 7.14 | 6.59 | 7.93  | 4.98 |
| 7    | 2.07 | 9.83  | 6.64 | 5.98 | 7.39 | 6.86 | 7.77  | 5.01 |
| 7.51 | 1.55 | 7.91  | 7.74 | 7.25 | 6.14 | 5.64 | 9.01  | 5.46 |
| 6.41 | 2.37 | 10.11 | 6.45 | 5.87 | 7.67 | 6.86 | 8.46  | 6.09 |
| 6.09 | 0.65 | 7.42  | 5.7  | 5.26 | 7.27 | 6.66 | 8.72  | 4.97 |
| 5.94 | 0    | 7.18  | 5.31 | 5.19 | 7.35 | 6.85 | 8.94  | 4.31 |
| 7.66 | 0.27 | 6.97  | 7.8  | 6.92 | 6.73 | 6.84 | 8.9   | 5.63 |
| 7.18 | 0.55 | 9.57  | 7.72 | 6.56 | 7.19 | 6.66 | 8.38  | 5.76 |
| 6.98 | 1.65 | 11.35 | 7.48 | 6.74 | 7.35 | 7.14 | 8.66  | 5.99 |
| 7.47 | 0.89 | 10.96 | 8.26 | 6.96 | 7.35 | 7.58 | 8.68  | 5.8  |
| 7.32 | 1.89 | 11.44 | 8.14 | 6.87 | 6.9  | 7.17 | 8.81  | 6.08 |
| 7.27 | 0.13 | 12.61 | 8.59 | 7.15 | 7.46 | 7.06 | 8.88  | 6.78 |
| 9.05 | 2.54 | 8.54  | 4.54 | 4.87 | 2.54 | 4.54 | 11.41 | 6.24 |
| 8.25 | 1.8  | 9.56  | 6.98 | 6.03 | 7.28 | 6.77 | 9.2   | 4.8  |
| 7.9  | 2.69 | 9.61  | 7.43 | 6.37 | 7.87 | 6.81 | 8.43  | 5.54 |
| 8.4  | 3.21 | 9.53  | 6.81 | 6.15 | 7.2  | 6.48 | 9.26  | 5.31 |

1  
2  
3  
4  
5  
6  
7  
8  
9  
10  
11  
12  
13  
14  
15  
16  
17  
18  
19  
20  
21  
22  
23  
24  
25  
26  
27  
28  
29  
30  
31  
32  
33  
34  
35  
36  
37  
38  
39  
40  
41  
42  
43  
44  
45  
46  
47  
48  
49  
50  
51  
52  
53  
54  
55  
56  
57  
58  
59  
60

| DLG1  | DLL4 | DPT   | DPYSL3 | DSC2  | DST   | ECM1  | ECM2 | ECSCR |
|-------|------|-------|--------|-------|-------|-------|------|-------|
| 9.33  | 7.53 | 7.67  | 8.24   | 7.57  | 8.38  | 7.3   | 7.27 | 5.69  |
| 9.1   | 7.71 | 7.34  | 8.13   | 9.72  | 10.07 | 9.5   | 6.91 | 6.36  |
| 8.99  | 7.4  | 7.61  | 8.05   | 11.24 | 9.8   | 10.42 | 6.82 | 6.27  |
| 9.38  | 8.29 | 7.65  | 9.98   | 10.62 | 10.24 | 10.13 | 6.41 | 7.81  |
| 9.21  | 8.37 | 8.96  | 8.76   | 8.83  | 8.63  | 8.77  | 8.29 | 3.82  |
| 8.79  | 7.28 | 7.59  | 9.03   | 8.15  | 8.74  | 7.55  | 6.83 | 5.66  |
| 8.83  | 7.28 | 7.27  | 8.37   | 8.51  | 8.71  | 7.38  | 6.73 | 5.92  |
| 9.41  | 8.13 | 8.47  | 9.67   | 9.72  | 9.46  | 8.05  | 6.73 | 6.2   |
| 8.89  | 7.72 | 6.3   | 9.38   | 7.21  | 8.94  | 6.61  | 6.6  | 6.17  |
| 8.88  | 6.92 | 9.63  | 8.78   | 7.09  | 8.69  | 7.83  | 6.64 | 4.86  |
| 9.01  | 6.89 | 6.45  | 8.63   | 7.69  | 8.67  | 6.74  | 5.33 | 5.93  |
| 9.01  | 7.28 | 7.37  | 9.88   | 7.34  | 9.34  | 7.55  | 6.24 | 7.13  |
| 8.96  | 6.93 | 7.29  | 8.17   | 8.71  | 8.01  | 7.39  | 7.11 | 5.56  |
| 9.02  | 7.55 | 8.39  | 9.1    | 8.5   | 8.47  | 8.04  | 7.44 | 6.73  |
| 9.5   | 8.8  | 10.09 | 10.74  | 9.55  | 8.81  | 8.14  | 7.47 | 7.05  |
| 9.06  | 7.95 | 8.33  | 9.19   | 8.66  | 8.37  | 7.63  | 7.09 | 6.83  |
| 9.24  | 7.95 | 7.93  | 9.66   | 9.72  | 9.28  | 10.05 | 7.1  | 5.29  |
| 9.34  | 7.92 | 8.54  | 10.24  | 8.81  | 8.59  | 8.24  | 7.24 | 6.05  |
| 9.73  | 8.42 | 8.76  | 9.27   | 6.41  | 8.44  | 7.69  | 7.16 | 7.36  |
| 9.75  | 7.28 | 7.25  | 9.05   | 7.5   | 8.3   | 7.1   | 6.56 | 7.2   |
| 9.6   | 7.49 | 8.3   | 10.13  | 6.61  | 8.51  | 6.93  | 6.88 | 7.51  |
| 9     | 7.36 | 6.85  | 10.08  | 9.54  | 9.96  | 8.04  | 6.42 | 6.92  |
| 8.91  | 6.87 | 7.12  | 8.98   | 9.69  | 9.94  | 7.86  | 6.15 | 6.93  |
| 9.25  | 6.73 | 7.46  | 10.96  | 9.09  | 9.99  | 7.49  | 6.32 | 6.52  |
| 9.37  | 6.26 | 7     | 9.3    | 8.68  | 9.11  | 5.67  | 5.18 | 4.82  |
| 8.83  | 5.94 | 6.17  | 6.83   | 9.16  | 9.02  | 6.83  | 5.08 | 5.91  |
| 8.87  | 5.95 | 6.91  | 7.39   | 9.16  | 9.15  | 6.86  | 5.04 | 6.01  |
| 8.93  | 7.35 | 8.01  | 7.81   | 9.13  | 8.66  | 7.44  | 6.56 | 5.89  |
| 8.78  | 7.43 | 7.45  | 7.71   | 7.95  | 7.84  | 7.86  | 6.83 | 5.37  |
| 8.88  | 7.84 | 7.72  | 8.57   | 8.13  | 9.02  | 7.61  | 6.81 | 5.84  |
| 8.91  | 7.68 | 7.59  | 8.26   | 8.13  | 8.26  | 7.5   | 6.72 | 5.9   |
| 8.78  | 8.12 | 8.01  | 8.68   | 8.43  | 8.55  | 8.48  | 7.52 | 5.88  |
| 8.77  | 7.81 | 8.49  | 7.89   | 7.73  | 7.89  | 7.4   | 6.65 | 6.77  |
| 9.99  | 7.77 | 4.58  | 10.26  | 6.43  | 9.14  | 8     | 6.89 | 6.99  |
| 10.19 | 7.71 | 4.25  | 8.76   | 7.57  | 8.88  | 7.69  | 5.97 | 6.71  |
| 10.24 | 7.89 | 6.86  | 9.97   | 6.86  | 9.14  | 7.87  | 6.93 | 7.17  |
| 8.12  | 6.06 | 7.29  | 8.06   | 9.97  | 7.38  | 4.97  | 5.03 | 5.9   |
| 8.25  | 4.96 | 6.57  | 8.35   | 10.45 | 7.42  | 6.89  | 4.76 | 5.83  |
| 8.22  | 5.07 | 8.09  | 8.68   | 10.12 | 7.41  | 7.11  | 6.27 | 6.37  |
| 8.1   | 5.1  | 7.87  | 9.14   | 9.04  | 8.26  | 6.33  | 5.53 | 5.99  |
| 8.66  | 7.42 | 7.27  | 8.33   | 9.35  | 8.02  | 7.15  | 6.74 | 5.68  |
| 8.8   | 7.24 | 7.02  | 8.3    | 9.25  | 8.19  | 7.94  | 7.03 | 4.8   |
| 8.76  | 6.85 | 7.04  | 8.07   | 9.49  | 8.17  | 7.34  | 6.61 | 5.08  |
| 8.91  | 6.85 | 6.21  | 8.19   | 9.35  | 8.13  | 7.24  | 5.94 | 4.4   |
| 9.35  | 8.07 | 8.5   | 8.56   | 11.28 | 7.99  | 6.56  | 6.45 | 4.45  |
| 9.55  | 5.56 | 7.27  | 8.72   | 8.43  | 8.2   | 6.31  | 5.4  | 5.96  |
| 9.33  | 5.91 | 7.42  | 9.5    | 8.55  | 8.33  | 6.44  | 6.19 | 6.75  |
| 9.19  | 5.9  | 8.84  | 10.47  | 8.25  | 8.99  | 7.17  | 7.44 | 6.54  |
| 9.7   | 6.78 | 7.32  | 9.59   | 9.93  | 9.75  | 7.74  | 6.9  | 6.39  |
| 9.55  | 6.37 | 5.05  | 9.5    | 10.1  | 9.76  | 8.06  | 6.76 | 6.75  |
| 9.62  | 6.02 | 7.79  | 8.63   | 10.13 | 9.75  | 6.89  | 6.22 | 6.17  |

<https://mc.manuscriptcentral.com/gut>

|    |       |      |      |       |       |       |       |      |      |
|----|-------|------|------|-------|-------|-------|-------|------|------|
| 1  |       |      |      |       |       |       |       |      |      |
| 2  | 9.43  | 6.78 | 7.2  | 10.23 | 10.12 | 9.82  | 7.62  | 7.2  | 6.44 |
| 3  | 9.41  | 7.24 | 7.33 | 8.24  | 9.47  | 7.89  | 8.19  | 7.01 | 5.39 |
| 4  | 9.54  | 7.6  | 7.12 | 8.56  | 9.26  | 7.93  | 8.3   | 6.97 | 6    |
| 5  | 9.52  | 7.28 | 6.92 | 8.08  | 9.52  | 8.53  | 8.29  | 6.84 | 5.98 |
| 6  | 9.52  | 7.14 | 7.53 | 9.12  | 9.2   | 8.13  | 7.97  | 6.94 | 5.14 |
| 7  |       |      |      |       |       |       |       |      |      |
| 8  | 9.22  | 6.74 | 7.96 | 8.51  | 8.7   | 7.82  | 6.14  | 5.84 | 7.02 |
| 9  | 9.66  | 7.08 | 6.11 | 8.59  | 9.04  | 8.83  | 6.88  | 5.15 | 6.69 |
| 10 | 9.89  | 6.25 | 3.53 | 6.82  | 7.47  | 7.81  | 6.7   | 4.81 | 5.48 |
| 11 | 9.71  | 7.11 | 6.76 | 9.66  | 8.18  | 8.75  | 6.88  | 5.69 | 6.55 |
| 12 | 9.27  | 7.62 | 5.2  | 8.22  | 8.97  | 7.02  | 5.79  | 5.67 | 5.51 |
| 13 | 9.44  | 7.08 | 6.3  | 8.22  | 9.15  | 7.88  | 6.37  | 5.63 | 6.32 |
| 14 |       |      |      |       |       |       |       |      |      |
| 15 | 9.3   | 6.87 | 5.02 | 8.22  | 8.64  | 7.45  | 6.27  | 5.31 | 6.1  |
| 16 | 9.33  | 6.9  | 7.08 | 9.14  | 8.36  | 7.7   | 6.65  | 5.56 | 6.21 |
| 17 | 11.15 | 8.32 | 8.85 | 7.15  | 9.67  | 8.15  | 10.93 | 8.15 | 6.15 |
| 18 | 9.9   | 8.3  | 8.34 | 9.12  | 9     | 8.64  | 9.23  | 7.78 | 5.54 |
| 19 | 9.2   | 7.93 | 8.15 | 8.85  | 8.16  | 8.26  | 8.41  | 7.38 | 4.8  |
| 20 |       |      |      |       |       |       |       |      |      |
| 21 | 10.48 | 9.18 | 9.57 | 9.61  | 10.35 | 9.11  | 10.06 | 9.15 | 2.24 |
| 22 | 10.07 | 9.09 | 9.6  | 9.78  | 10.02 | 8.76  | 9.8   | 9.32 | 0.77 |
| 23 | 9.01  | 7.11 | 6.75 | 7.34  | 8.82  | 7.99  | 8.98  | 6.66 | 5.05 |
| 24 | 9.06  | 7.29 | 6.71 | 6.82  | 9.2   | 8.52  | 9.64  | 6.84 | 4.78 |
| 25 | 9     | 7.34 | 7.18 | 8.1   | 9.16  | 8.47  | 9.18  | 7.1  | 5.16 |
| 26 | 9.78  | 7.41 | 5.95 | 9.27  | 10.38 | 9.98  | 9.06  | 6.79 | 7.01 |
| 27 | 9.64  | 7.4  | 7.12 | 9.17  | 9.96  | 10.26 | 8.4   | 6.83 | 6.7  |
| 28 |       |      |      |       |       |       |       |      |      |
| 29 | 9.55  | 7.54 | 8.54 | 9.38  | 8.85  | 9.98  | 7.62  | 8    | 6    |
| 30 | 10.02 | 7.05 | 7.18 | 8.71  | 9.55  | 8.33  | 8.84  | 5.16 | 6.64 |
| 31 | 10.1  | 7.16 | 6.74 | 9.44  | 9.34  | 8.42  | 10.19 | 6.17 | 6.77 |
| 32 | 10.15 | 6.71 | 8.1  | 9.95  | 8.97  | 8.79  | 10.56 | 5.64 | 6.8  |
| 33 | 9.24  | 7.2  | 7.07 | 8.39  | 9.3   | 7.84  | 7.48  | 6.29 | 5.53 |
| 34 | 9.23  | 7.19 | 6.93 | 8.98  | 9.26  | 7.98  | 7.23  | 6.32 | 6.02 |
| 35 | 9.17  | 7.04 | 7.55 | 9.25  | 9.34  | 8.22  | 7.41  | 6.55 | 5.83 |
| 36 |       |      |      |       |       |       |       |      |      |
| 37 | 9.36  | 8.27 | 8.36 | 8.96  | 9.74  | 9.1   | 8.47  | 7.59 | 6.05 |
| 38 | 9.27  | 8.18 | 7.76 | 8.46  | 9.74  | 9.18  | 8.78  | 7.26 | 5.41 |
| 39 | 9.48  | 8.54 | 8.05 | 8.69  | 9.93  | 9.25  | 8.9   | 7.34 | 5.24 |
| 40 | 9.11  | 7.31 | 7.8  | 9.51  | 8.95  | 9.26  | 8.27  | 6.99 | 5.84 |
| 41 | 9.23  | 7.46 | 7.83 | 8.81  | 9.16  | 8.86  | 8.27  | 7    | 5.43 |
| 42 | 9.15  | 7.46 | 8.64 | 9.79  | 9.21  | 9.18  | 8.57  | 7.47 | 6.05 |
| 43 | 9.09  | 7.88 | 8.19 | 9.39  | 8.41  | 8.5   | 8     | 7.68 | 6.41 |
| 44 | 9.09  | 7.88 | 8.19 | 9.39  | 8.41  | 8.5   | 8     | 7.68 | 6.41 |
| 45 | 9.44  | 7.73 | 8.02 | 9.6   | 8.09  | 8.82  | 8.43  | 7.29 | 4.67 |
| 46 | 9.31  | 7.67 | 8.99 | 10.09 | 8.57  | 9.2   | 8.63  | 7.3  | 5.7  |
| 47 | 9.34  | 7.45 | 7.88 | 10.32 | 7.98  | 9.03  | 8.64  | 7.66 | 5.49 |
| 48 |       |      |      |       |       |       |       |      |      |
| 49 | 8.93  | 7.85 | 8.36 | 8.34  | 8.06  | 8.34  | 7.65  | 7.4  | 5.76 |
| 50 | 9.56  | 7.68 | 7.83 | 9.19  | 7.95  | 8.99  | 7.63  | 7.26 | 5.97 |
| 51 | 9.42  | 7.67 | 7.18 | 8.71  | 8.71  | 8.9   | 7.27  | 6.72 | 6.46 |
| 52 | 9.13  | 7.96 | 8.59 | 9.74  | 8.74  | 9.13  | 7.85  | 7.42 | 6.07 |
| 53 | 9.94  | 7.38 | 5.08 | 9.25  | 10.07 | 8.88  | 8.25  | 5.98 | 5.9  |
| 54 | 9.97  | 6.84 | 4.93 | 7.73  | 10.38 | 8.83  | 9.53  | 5.29 | 5.88 |
| 55 | 9.64  | 7.85 | 6.04 | 9.4   | 10.45 | 8.88  | 9.29  | 6.69 | 6.67 |
| 56 | 8.59  | 8.04 | 8.14 | 8.79  | 8.5   | 8.36  | 7.32  | 7.41 | 6.09 |
| 57 | 8.84  | 8.06 | 7.98 | 10.23 | 8.21  | 9.02  | 8.49  | 7.53 | 6.44 |
| 58 | 8.79  | 7.98 | 7.75 | 10.55 | 8.33  | 9.09  | 8.34  | 7.69 | 5.85 |
| 59 |       |      |      |       |       |       |       |      |      |
| 60 | 8.3   | 7.23 | 7.66 | 8.35  | 8.4   | 8.8   | 7.51  | 7.41 | 4.92 |

<https://mc.manuscriptcentral.com/gut>

1  
2  
3  
4  
5  
6  
7  
8  
9  
10  
11  
12  
13  
14  
15  
16  
17  
18  
19  
20  
21  
22  
23  
24  
25  
26  
27  
28  
29  
30  
31  
32  
33  
34  
35  
36  
37  
38  
39  
40  
41  
42  
43  
44  
45  
46  
47  
48  
49  
50  
51  
52  
53  
54  
55  
56  
57  
58  
59  
60

|      |       |       |       |       |       |       |      |      |
|------|-------|-------|-------|-------|-------|-------|------|------|
| 8.22 | 7.2   | 7.48  | 8.49  | 8.52  | 9.11  | 7.71  | 7.14 | 5.59 |
| 8.41 | 7.73  | 8.44  | 9.2   | 8.92  | 9.08  | 8.81  | 8.01 | 4.73 |
| 9.89 | 6.68  | 8.63  | 8.52  | 7.26  | 8.6   | 7.22  | 6.46 | 6.53 |
| 9.85 | 6.91  | 8.14  | 9.89  | 11.47 | 10.69 | 11.54 | 6.18 | 7.8  |
| 9.65 | 7.43  | 8.32  | 10.8  | 7.51  | 9.72  | 8.57  | 7.13 | 7.51 |
| 8.86 | 7.15  | 8.76  | 9.55  | 9.69  | 8.76  | 7.2   | 7.19 | 6.82 |
| 9.69 | 6.18  | 5.36  | 8.52  | 9.36  | 8.91  | 7.8   | 5.53 | 5.81 |
| 9.48 | 6.2   | 5.59  | 9.1   | 9.29  | 9.14  | 7.79  | 5.73 | 6.26 |
| 9.76 | 9.52  | 9.65  | 11.04 | 11.6  | 9.99  | 10.38 | 7.54 | 7.25 |
| 9.57 | 8.25  | 7.88  | 8.71  | 7.28  | 8.73  | 6.18  | 6.08 | 6.98 |
| 9.61 | 7.09  | 3.95  | 8.78  | 7.56  | 8.6   | 5.92  | 5.7  | 5.49 |
| 9.05 | 7     | 7     | 7.69  | 7.44  | 8.24  | 6.62  | 6.61 | 4.48 |
| 9.77 | 9.42  | 8.62  | 10.69 | 8.95  | 9.41  | 8.62  | 7.69 | 6.65 |
| 9.88 | 9.16  | 9.8   | 8.23  | 8.8   | 7.99  | 9.52  | 9.23 | 1.2  |
| 9.44 | 6.23  | 4.99  | 8.27  | 7.52  | 6.85  | 7.69  | 5.9  | 5.78 |
| 9.41 | 6.06  | 2.83  | 7.64  | 7.35  | 6.34  | 7.33  | 5.39 | 6.33 |
| 9.5  | 6.21  | 5.63  | 8.84  | 7.58  | 7.21  | 7.69  | 5.61 | 5.91 |
| 9.12 | 6.05  | 8.26  | 8.8   | 9.01  | 8.31  | 6.98  | 5.79 | 5.64 |
| 8.73 | 6.81  | 8.6   | 9.11  | 8.25  | 8.02  | 7.85  | 6.57 | 4.44 |
| 8.84 | 6.15  | 7.93  | 9.19  | 8.51  | 8.04  | 7.66  | 6.55 | 5.28 |
| 9.81 | 11.27 | 10.45 | 8.86  | 9.92  | 6.75  | 8.62  | 7.16 | 6.16 |
| 9.3  | 6.06  | 4.42  | 6.93  | 8.19  | 8.38  | 5.91  | 4.81 | 5.47 |
| 9.41 | 6.24  | 6.49  | 8.34  | 9.08  | 8.36  | 7.01  | 4.93 | 6.03 |
| 9.47 | 7.54  | 7.2   | 9.48  | 9.3   | 8.79  | 7.31  | 6.64 | 6.18 |
| 9.43 | 8.46  | 8.27  | 9.85  | 9.8   | 8.87  | 8.25  | 6.99 | 6.84 |
| 9.1  | 7.14  | 5.97  | 10.22 | 8.93  | 8.93  | 7.3   | 7.76 | 7    |
| 8.78 | 8.33  | 8.79  | 8.26  | 8.7   | 8.39  | 8.41  | 8.01 | 3.8  |
| 8.8  | 8.33  | 8.86  | 8.47  | 8.81  | 8.45  | 8.45  | 8    | 2.44 |
| 8.56 | 8.23  | 8.65  | 8.69  | 8.66  | 8.34  | 7.79  | 8.07 | 3.77 |
| 9.01 | 6.12  | 7.44  | 9.15  | 7.17  | 8.07  | 5.74  | 6.4  | 6.03 |
| 8.72 | 6.11  | 7.89  | 10.31 | 6.05  | 8.61  | 7.78  | 6.53 | 6.82 |
| 9.34 | 6.34  | 7.25  | 9.45  | 6.99  | 8.08  | 7.11  | 5.78 | 6.13 |
| 8.65 | 6.33  | 7.11  | 10.07 | 6.6   | 8.59  | 7.16  | 7.43 | 6.87 |
| 7.92 | 7.66  | 7.77  | 8.09  | 8.07  | 7.86  | 7.37  | 7.42 | 3.45 |
| 8.26 | 7.13  | 7.29  | 7.32  | 7.78  | 7.97  | 6.91  | 7.25 | 2.57 |
| 8.21 | 6.84  | 6.98  | 7.28  | 7.69  | 7.94  | 6.86  | 6.85 | 2.93 |
| 9.11 | 7.59  | 8.01  | 8.4   | 8.71  | 8.29  | 8.16  | 7.97 | 0    |
| 7.89 | 7.79  | 7.94  | 7.6   | 8.01  | 7.34  | 7.48  | 7.22 | 1.34 |
| 7.64 | 7.59  | 7.51  | 7.45  | 8.03  | 7.54  | 7.45  | 7.35 | 4.1  |
| 7.65 | 7.33  | 7.75  | 7.59  | 7.94  | 7.58  | 6.97  | 7.33 | 3.77 |
| 9.82 | 6.73  | 7.77  | 8.52  | 9.98  | 6.93  | 8.34  | 8.56 | 2.41 |
| 8.81 | 8.57  | 8.54  | 8.51  | 8.91  | 8.27  | 8.56  | 8.23 | 3.64 |
| 9.03 | 8.9   | 8.96  | 8.69  | 9.11  | 8.72  | 8.7   | 8.61 | 2.33 |
| 8.83 | 8.22  | 7.97  | 7.83  | 8.2   | 7.65  | 7.83  | 7.6  | 2.87 |
| 8.69 | 8.46  | 8.52  | 8.4   | 8.67  | 8.12  | 8.1   | 8.08 | 2.75 |
| 8.93 | 8.12  | 8.52  | 8.36  | 8.41  | 8.7   | 8.13  | 7.55 | 5    |
| 9.03 | 8.47  | 9.08  | 8.1   | 8.78  | 8.92  | 8.63  | 8.26 | 4.1  |
| 9.12 | 8.15  | 9.11  | 8.39  | 8.9   | 8.89  | 8.34  | 8.28 | 3.88 |
| 9.09 | 8.42  | 8.49  | 8.73  | 8.9   | 9.05  | 8.98  | 8.16 | 1.9  |
| 8.33 | 6.58  | 6.92  | 8.06  | 7.62  | 8.26  | 6.51  | 6.81 | 4.61 |
| 9.18 | 6.71  | 7.21  | 8.32  | 9.3   | 7.96  | 6.82  | 7.11 | 4.91 |
| 9.12 | 6.99  | 7.12  | 8.14  | 9.2   | 7.98  | 7.16  | 7.49 | 5.43 |

<https://mc.manuscriptcentral.com/gut>

1  
2  
3  
4  
5  
6  
7  
8  
9  
10  
11  
12  
13  
14  
15  
16  
17  
18  
19  
20  
21  
22  
23  
24  
25  
26  
27  
28  
29  
30  
31  
32  
33  
34  
35  
36  
37  
38  
39  
40  
41  
42  
43  
44  
45  
46  
47  
48  
49  
50  
51  
52  
53  
54  
55  
56  
57  
58  
59  
60

|       |      |       |       |       |       |      |      |      |
|-------|------|-------|-------|-------|-------|------|------|------|
| 9.12  | 7.37 | 7.55  | 8.41  | 8.84  | 7.87  | 7.15 | 7.42 | 4.79 |
| 9.99  | 7.78 | 8.14  | 9.69  | 9.81  | 8.87  | 7.39 | 7.32 | 6.56 |
| 9.86  | 7.65 | 9.02  | 9.32  | 10.3  | 9.16  | 8.29 | 7.51 | 6.95 |
| 9.89  | 7.91 | 9.07  | 8.13  | 10.23 | 8.62  | 7.93 | 7.05 | 6.03 |
| 10.01 | 7.91 | 8.64  | 8.32  | 10.33 | 8.63  | 7.96 | 7.02 | 5.69 |
| 9.82  | 7.43 | 8.14  | 9.41  | 9.05  | 8.99  | 7.99 | 7.4  | 5.81 |
| 10.22 | 7.4  | 8.19  | 9.67  | 9.52  | 9.15  | 7.94 | 6.4  | 7.07 |
| 10.48 | 6.77 | 6.58  | 8.92  | 9.14  | 8.84  | 7.64 | 6.11 | 6.49 |
| 10.08 | 7.12 | 11.12 | 11.23 | 8.64  | 9.54  | 8.3  | 7.72 | 7.51 |
| 10.63 | 8.27 | 5.97  | 9.35  | 9.33  | 10.73 | 7.71 | 7.03 | 6.83 |
| 10.48 | 7.62 | 6.97  | 10.06 | 9.29  | 9.91  | 7.95 | 7.08 | 6.95 |
| 10.32 | 7.87 | 6.24  | 10.1  | 9.45  | 10.32 | 7.94 | 7    | 6.72 |
| 10.63 | 8.16 | 6.42  | 10.11 | 8.89  | 10.01 | 7.38 | 6.65 | 6.81 |
| 9.32  | 7.06 | 6.78  | 8.17  | 8.43  | 8.73  | 7.02 | 6.9  | 5.26 |
| 9.77  | 6.45 | 4.32  | 8.07  | 7.63  | 9.1   | 7.02 | 6.24 | 6.14 |
| 9.19  | 7.4  | 8.39  | 10.33 | 8.87  | 9.28  | 8.16 | 7.53 | 6.73 |
| 9     | 7.1  | 8.43  | 8.97  | 7.06  | 8.75  | 6.02 | 6.89 | 7.66 |
| 9.62  | 6.22 | 7.27  | 9.27  | 8.24  | 9.03  | 7.96 | 6.67 | 6.67 |
| 9.41  | 7.07 | 8.02  | 11.16 | 7.44  | 9.61  | 8.14 | 7.21 | 7.18 |
| 8.77  | 5.88 | 7.14  | 8.84  | 9.11  | 9.02  | 6.72 | 6.66 | 5.91 |
| 9.19  | 7.06 | 6.43  | 9.15  | 9.42  | 8.74  | 8.08 | 5.59 | 5.94 |
| 9.65  | 7.09 | 4.52  | 7.95  | 9.86  | 7.81  | 7.67 | 4.65 | 5.18 |
| 8.64  | 7.48 | 7.01  | 9.28  | 8.5   | 8.66  | 7.68 | 7.06 | 6.23 |
| 8.64  | 7.54 | 7.25  | 9.23  | 8.41  | 8.39  | 7.64 | 6.74 | 5.84 |
| 8.93  | 9.1  | 9.66  | 11.73 | 9.64  | 9.44  | 8.91 | 7.67 | 6.74 |
| 7.97  | 6.24 | 7.9   | 8.09  | 7.49  | 7.06  | 4.36 | 4.75 | 5.41 |
| 8.17  | 6.65 | 6.98  | 8.45  | 7.23  | 7.66  | 6.65 | 5.74 | 5.43 |
| 8.15  | 6.56 | 5.46  | 8.09  | 8.1   | 6.78  | 6.56 | 5.16 | 5.16 |
| 8.72  | 6.29 | 8.72  | 9.99  | 7.85  | 8.15  | 7.03 | 6.29 | 6.71 |
| 7.64  | 7.34 | 7.89  | 7.49  | 7.87  | 7.76  | 7.04 | 7.37 | 2.76 |
| 7.7   | 7.26 | 7.73  | 7.61  | 7.79  | 7.7   | 7.64 | 6.97 | 3.72 |
| 8.08  | 7.24 | 7.85  | 7.31  | 7.68  | 7.51  | 7.31 | 7.15 | 4.05 |
| 7.7   | 7.48 | 7.57  | 7.48  | 7.35  | 7.53  | 7.37 | 7.38 | 3.96 |
| 8.01  | 6.69 | 6.14  | 7     | 6.39  | 6.64  | 6.21 | 6.1  | 4.31 |
| 8.09  | 7.04 | 6.94  | 7.89  | 7.07  | 7.35  | 7.04 | 6.67 | 4.79 |
| 7.95  | 6.99 | 6.93  | 8.5   | 6.79  | 7.41  | 6.71 | 6.47 | 5.41 |
| 7.85  | 6.69 | 6.76  | 8.81  | 7.16  | 7.59  | 6.76 | 6.7  | 5.1  |
| 8.71  | 6.86 | 8.18  | 8.02  | 6.64  | 7.79  | 4.35 | 5    | 6.86 |
| 9.56  | 7.22 | 7.39  | 9.48  | 9.66  | 9.24  | 7.48 | 6.05 | 5.99 |
| 9.46  | 7.78 | 6.79  | 7.72  | 8.75  | 7.66  | 7.42 | 5.12 | 6.25 |
| 9.28  | 9.16 | 9.62  | 9.36  | 8.85  | 8.01  | 8.46 | 6.04 | 7.09 |
| 8.66  | 6.98 | 7.33  | 8.54  | 8.06  | 8.53  | 8.17 | 6.58 | 5.04 |
| 9.64  | 9.37 | 11.71 | 10.46 | 7.32  | 7.97  | 8.32 | 4.51 | 7.1  |
| 8.87  | 6.54 | 8.28  | 9.3   | 8.29  | 9.24  | 7.51 | 5.91 | 6.42 |
| 8.86  | 6.26 | 8.32  | 10.64 | 7.91  | 9.85  | 7.58 | 7.06 | 6.29 |
| 9.59  | 6.41 | 3     | 6.59  | 8.38  | 8.64  | 4.14 | 4    | 4    |
| 9.14  | 7.17 | 8.12  | 9.89  | 8.5   | 8.87  | 7.07 | 6.31 | 5.51 |
| 9.19  | 6.47 | 7.45  | 9.48  | 7.99  | 8.58  | 6.06 | 5.13 | 5.7  |
| 8.82  | 7.21 | 8.11  | 9.71  | 8.15  | 8.37  | 7.24 | 6.34 | 5.06 |
| 7.93  | 6.33 | 8.26  | 8.84  | 8.33  | 8.33  | 4.66 | 4.93 | 5.43 |
| 8.05  | 6.51 | 6.62  | 9.05  | 7.41  | 8.39  | 6.39 | 5.92 | 5.39 |
| 7.94  | 6.82 | 6.86  | 9.13  | 7.58  | 8.15  | 6.24 | 6.39 | 5.19 |

<https://mc.manuscriptcentral.com/gut>

1  
2  
3  
4  
5  
6  
7  
8  
9  
10  
11  
12  
13  
14  
15  
16  
17  
18  
19  
20  
21  
22  
23  
24  
25  
26  
27  
28  
29  
30  
31  
32  
33  
34  
35  
36  
37  
38  
39  
40  
41  
42  
43  
44  
45  
46  
47  
48  
49  
50  
51  
52  
53  
54  
55  
56  
57  
58  
59  
60

|      |      |      |       |       |      |      |      |      |
|------|------|------|-------|-------|------|------|------|------|
| 8.38 | 6.04 | 7.7  | 10.23 | 7.71  | 9.04 | 5.74 | 6.25 | 5.92 |
| 7.92 | 7.25 | 6.88 | 9.33  | 7.33  | 8.31 | 7.01 | 6.49 | 5.19 |
| 7.75 | 6.72 | 5.94 | 7.46  | 7.63  | 8    | 6.76 | 5.63 | 5.17 |
| 7.96 | 6.37 | 5.35 | 7.04  | 7.42  | 8.23 | 6.91 | 5.98 | 5.01 |
| 8.12 | 8.74 | 8.32 | 8.51  | 8.2   | 7.66 | 7.95 | 7.41 | 4.88 |
| 7.99 | 6.31 | 7.29 | 8.59  | 8.24  | 7.53 | 5.12 | 5.21 | 5.45 |
| 8.28 | 6.66 | 4.24 | 6.85  | 8.69  | 6.37 | 4.11 | 2.97 | 4.35 |
| 8.35 | 6.82 | 3.52 | 6.73  | 8.89  | 6.65 | 4.52 | 3.35 | 4.16 |
| 8.17 | 7.99 | 8.25 | 8     | 8.36  | 7.83 | 7.89 | 7.51 | 2.27 |
| 8.32 | 7.47 | 7.78 | 8.73  | 8.74  | 8.36 | 7.29 | 7.08 | 5.03 |
| 8.41 | 6.06 | 7.87 | 9.65  | 8.54  | 9.1  | 5.33 | 6.7  | 5.84 |
| 8.64 | 6.96 | 7.21 | 9.98  | 8.57  | 8.75 | 7.25 | 6.84 | 5.06 |
| 8.74 | 6.35 | 9.13 | 10.18 | 8.58  | 9.01 | 6.87 | 6.79 | 6    |
| 8.17 | 6.81 | 9.62 | 10.24 | 8.01  | 9.16 | 6.84 | 7.71 | 5.8  |
| 9.14 | 8.77 | 9.11 | 8.83  | 11.03 | 8.22 | 7.54 | 6.35 | 5.35 |
| 8.41 | 5.47 | 7.49 | 8.69  | 8.1   | 7.73 | 6.4  | 5.71 | 5.26 |
| 8.46 | 6.18 | 7.23 | 8.27  | 7.39  | 7.32 | 7.02 | 6.03 | 5.26 |
| 8.47 | 5.64 | 7.4  | 8.66  | 8.36  | 7.81 | 6.41 | 5.73 | 5.48 |

1  
2  
3  
4  
5  
6  
7  
8  
9  
10  
11  
12  
13  
14  
15  
16  
17  
18  
19  
20  
21  
22  
23  
24  
25  
26  
27  
28  
29  
30  
31  
32  
33  
34  
35  
36  
37  
38  
39  
40  
41  
42  
43  
44  
45  
46  
47  
48  
49  
50  
51  
52  
53  
54  
55  
56  
57  
58  
59  
60

| EDN1 | EGF  | EGFL7 | EGFR  | EGLN2 | EGLN3 | EIF2AK3 | EIF4E2 | EIF4EBP1 |
|------|------|-------|-------|-------|-------|---------|--------|----------|
| 7.15 | 6.54 | 7.47  | 8.28  | 7.68  | 7.42  | 7.32    | 8.69   | 6.78     |
| 6.39 | 5.84 | 8.02  | 9.07  | 7.81  | 8.24  | 7.42    | 9.09   | 7.72     |
| 7.04 | 5.81 | 8.08  | 9.15  | 7.7   | 8.2   | 7.12    | 9.01   | 7.7      |
| 7.25 | 1.76 | 9.14  | 9.46  | 8.5   | 6.89  | 7.56    | 9.07   | 8.16     |
| 7.92 | 7.71 | 8.98  | 8.8   | 6.76  | 7.97  | 7.62    | 8.85   | 3.59     |
| 7.56 | 5.93 | 7.59  | 8.32  | 8.6   | 7.62  | 7.5     | 8.68   | 6.8      |
| 7.73 | 5.94 | 7.36  | 8.23  | 8.68  | 7.59  | 7.63    | 8.93   | 6.93     |
| 7.97 | 3.39 | 8.71  | 8.77  | 9.19  | 8.1   | 8.27    | 9.1    | 7.42     |
| 5.86 | 0.37 | 8.37  | 6.92  | 9.01  | 8.48  | 8.35    | 9.62   | 8.42     |
| 7.68 | 5.77 | 7.16  | 8.01  | 7.91  | 9.13  | 7.23    | 9.41   | 7.42     |
| 7.27 | 2.38 | 6.92  | 8.01  | 8.74  | 8.57  | 7.81    | 9.52   | 8.77     |
| 8.43 | 2.27 | 8.19  | 8.42  | 9.02  | 8.7   | 7.48    | 9.87   | 7.85     |
| 8.32 | 5.61 | 7.95  | 9.26  | 8.27  | 7.07  | 6.72    | 9.22   | 7.17     |
| 7.95 | 6.05 | 8.38  | 9.04  | 8.32  | 6.93  | 6.99    | 9.43   | 7.79     |
| 7.7  | 1.77 | 10.73 | 8.16  | 8.93  | 7.35  | 8.98    | 9.85   | 8.29     |
| 7.78 | 6.23 | 8.45  | 8.81  | 8.17  | 9.18  | 7.25    | 9.37   | 7.28     |
| 8.32 | 6.33 | 7.81  | 9.31  | 8.03  | 8.84  | 7.57    | 9.45   | 7.36     |
| 8.53 | 6.05 | 8.33  | 9.34  | 7.81  | 9.76  | 7.3     | 9.63   | 8.07     |
| 9.26 | 1.48 | 10.14 | 7.31  | 9.26  | 6.18  | 8.43    | 9.27   | 7.1      |
| 8.26 | 2.12 | 8.19  | 7.15  | 9     | 7.18  | 8.05    | 9.38   | 7.84     |
| 8.5  | 1.5  | 9.1   | 7.87  | 9.26  | 6.81  | 8.05    | 9.34   | 7.25     |
| 8.07 | 2.96 | 8.25  | 9.11  | 9.93  | 6.59  | 8.15    | 9.85   | 10.05    |
| 7.96 | 2.78 | 8.2   | 9.73  | 9.94  | 6.01  | 8.25    | 9.76   | 10.19    |
| 8.51 | 3.8  | 7.58  | 9.21  | 9.77  | 7.18  | 8.07    | 9.65   | 9.62     |
| 6.23 | 0.43 | 8.06  | 8.51  | 8.63  | 5.89  | 7.37    | 9.03   | 8.13     |
| 7.67 | 0.13 | 7.15  | 8.8   | 9.19  | 8.07  | 7.92    | 9.16   | 8        |
| 7.53 | 3.11 | 7.3   | 8.69  | 9.08  | 7.96  | 7.8     | 9.17   | 8.15     |
| 7.89 | 5.64 | 7.51  | 8.55  | 8.81  | 8.13  | 8       | 9.07   | 7.49     |
| 7.99 | 5.98 | 7.92  | 8.67  | 8.39  | 6.22  | 6.84    | 9.08   | 8.08     |
| 8.3  | 6.31 | 8.17  | 12.57 | 8.44  | 7.11  | 7.36    | 9.23   | 7.41     |
| 7.54 | 5.66 | 8.14  | 10.65 | 8.76  | 6.81  | 7.05    | 8.85   | 8.14     |
| 8.04 | 6.96 | 8.83  | 9.99  | 8.26  | 6.88  | 7.53    | 9.12   | 7.35     |
| 7.13 | 5.99 | 9.33  | 7.37  | 8.58  | 7.77  | 7.69    | 8.63   | 6.45     |
| 7.32 | 0.06 | 8.75  | 8.11  | 9.78  | 8.23  | 8.06    | 9.37   | 7.92     |
| 7.1  | 1.2  | 8.51  | 8.1   | 9.4   | 9.03  | 8.45    | 9.59   | 8.3      |
| 7.16 | 0.47 | 8.97  | 8.28  | 9.54  | 7.97  | 8.19    | 9.26   | 7.94     |
| 7.1  | 0.45 | 7.27  | 7.79  | 8.47  | 4.84  | 7.07    | 9.12   | 7.98     |
| 6.05 | 0.99 | 6.58  | 8.28  | 8.38  | 6.32  | 7.19    | 8.91   | 7.46     |
| 6.15 | 2.95 | 7.08  | 7.57  | 8.38  | 5.72  | 7.28    | 8.83   | 7.13     |
| 6.03 | 2.55 | 6.53  | 7.7   | 8.36  | 6.15  | 7.14    | 8.75   | 7.28     |
| 7.18 | 6    | 7.8   | 7.89  | 7.67  | 7.97  | 6.78    | 8.52   | 5.92     |
| 7.03 | 6.03 | 7.35  | 7.96  | 7.66  | 7.67  | 6.93    | 8.58   | 6.31     |
| 7.01 | 6.08 | 7.42  | 7.96  | 7.49  | 7.48  | 7.08    | 8.58   | 5.97     |
| 6.38 | 5.02 | 6.87  | 7.78  | 8.2   | 7.62  | 7.55    | 8.6    | 6.17     |
| 6.56 | 4.45 | 10.38 | 7.77  | 8.03  | 8.53  | 7.56    | 10.69  | 7.5      |
| 6.9  | 1.9  | 6.93  | 9.01  | 8.3   | 6.46  | 7.74    | 9.57   | 7.21     |
| 6.66 | 1    | 7.35  | 9.07  | 8.26  | 6.42  | 7.42    | 9.51   | 7.22     |
| 6.65 | 0    | 7.25  | 8.94  | 8.32  | 7.17  | 7.52    | 9.21   | 7.15     |
| 8.71 | 1.63 | 8.26  | 9.87  | 9.37  | 8.05  | 8.06    | 9.9    | 9.07     |
| 9.03 | 1.59 | 7.82  | 9.16  | 9.34  | 7.57  | 7.47    | 9.53   | 9.58     |
| 9.47 | 1.5  | 7.21  | 9.18  | 9.95  | 7.14  | 7.56    | 9.68   | 9.54     |

1  
2  
3  
4  
5  
6  
7  
8  
9  
10  
11  
12  
13  
14  
15  
16  
17  
18  
19  
20  
21  
22  
23  
24  
25  
26  
27  
28  
29  
30  
31  
32  
33  
34  
35  
36  
37  
38  
39  
40  
41  
42  
43  
44  
45  
46  
47  
48  
49  
50  
51  
52  
53  
54  
55  
56  
57  
58  
59  
60

|      |      |       |       |      |      |      |       |      |
|------|------|-------|-------|------|------|------|-------|------|
| 9.41 | 2.89 | 7.77  | 8.84  | 9.41 | 7.93 | 7.63 | 9.47  | 9.38 |
| 8.83 | 5.12 | 7.67  | 8.76  | 9.04 | 8.01 | 7.38 | 9.82  | 8.04 |
| 7.47 | 5.77 | 7.88  | 8.71  | 9.07 | 7.64 | 7.51 | 9.79  | 7.92 |
| 7.41 | 5.31 | 7.75  | 8.6   | 9.12 | 7.93 | 7.76 | 9.89  | 8.19 |
| 7.18 | 6.01 | 7.43  | 8.68  | 8.95 | 7.68 | 7.57 | 9.73  | 7.93 |
| 8.4  | 4.23 | 8.3   | 10.22 | 9.12 | 6.44 | 7.58 | 9.66  | 8.54 |
| 7.75 | 2.57 | 8.32  | 10.48 | 9.54 | 7.53 | 7.78 | 9.61  | 9.6  |
| 6.88 | 1.81 | 8.09  | 9.41  | 9.34 | 7.24 | 7.87 | 9.3   | 9.71 |
| 6.99 | 1.44 | 8.15  | 9.47  | 9.88 | 8.41 | 8.16 | 9.58  | 9.42 |
| 5.44 | 0    | 8.24  | 8.92  | 8.71 | 10.7 | 7.71 | 8.57  | 9.2  |
| 6.71 | 1.54 | 7.76  | 8.89  | 8.55 | 8.18 | 8.13 | 9.3   | 9.12 |
| 6.96 | 0.82 | 8.16  | 9.08  | 8.68 | 7.7  | 7.51 | 8.82  | 9.38 |
| 6.9  | 1.98 | 7.81  | 8.96  | 8.65 | 7.56 | 7.61 | 8.86  | 9.03 |
| 8.74 | 5.15 | 11.79 | 8.47  | 7.47 | 6.15 | 6.74 | 9.15  | 6.74 |
| 9.21 | 5.31 | 9.79  | 8.14  | 8.34 | 8.06 | 8.07 | 9.75  | 7.77 |
| 8.99 | 6.65 | 8.38  | 8.31  | 8.2  | 8    | 7.97 | 9.16  | 7.58 |
| 9.92 | 8.32 | 10.33 | 8.76  | 6.47 | 9.41 | 8.79 | 10.13 | 1.24 |
| 9.62 | 7.92 | 10.65 | 9.02  | 6.13 | 8.79 | 8.12 | 9.51  | 6.1  |
| 7.81 | 5.87 | 7.88  | 10.09 | 8.11 | 8.18 | 6.75 | 9.64  | 8.76 |
| 7.55 | 5.7  | 7.7   | 10.24 | 7.98 | 8.54 | 6.67 | 9.45  | 8.55 |
| 8.12 | 6.39 | 7.94  | 10.19 | 7.93 | 7.99 | 6.74 | 9.42  | 8.32 |
| 8.78 | 1.1  | 8.56  | 9.8   | 8.84 | 6.63 | 8    | 8.86  | 7.85 |
| 8.91 | 4.19 | 8.69  | 9.48  | 8.77 | 7.06 | 7.71 | 9.07  | 7.48 |
| 8.94 | 6.22 | 8.71  | 9.58  | 7.86 | 7.48 | 7.53 | 8.96  | 6.09 |
| 8.78 | 2.96 | 7.84  | 9.38  | 9.26 | 8.99 | 8.85 | 10.04 | 8.56 |
| 9.23 | 1.63 | 8.21  | 9.38  | 9.27 | 8.93 | 8.27 | 9.94  | 8.29 |
| 9.03 | 1.69 | 8.28  | 9.44  | 9.36 | 9.09 | 8.11 | 9.95  | 8.23 |
| 8.79 | 6.27 | 7.31  | 8.71  | 8.51 | 7.92 | 7.81 | 9.47  | 8.35 |
| 9.05 | 5.37 | 7.11  | 8.89  | 8.66 | 7.75 | 7.67 | 9.54  | 8.15 |
| 8.3  | 6.28 | 7.51  | 8.79  | 8.37 | 7.95 | 7.8  | 9.48  | 7.88 |
| 7.35 | 6.94 | 7.83  | 9.03  | 8.58 | 8.43 | 7.57 | 9.6   | 7.53 |
| 7.13 | 6.57 | 7.74  | 9.33  | 8.49 | 8.38 | 7.36 | 9.82  | 8.11 |
| 8.04 | 6.92 | 7.98  | 9.44  | 8.52 | 8.49 | 7.49 | 9.66  | 7.65 |
| 8.61 | 6.51 | 7.86  | 8.57  | 7.81 | 8.36 | 7.4  | 8.84  | 8.25 |
| 8.11 | 6.54 | 7.81  | 8.46  | 7.6  | 8.67 | 7.49 | 8.75  | 8.61 |
| 8.32 | 6.4  | 8.16  | 8.42  | 7.94 | 8.42 | 7.16 | 8.96  | 8.11 |
| 8.34 | 7.21 | 7.99  | 8.75  | 8.02 | 7.76 | 7.38 | 9.14  | 6.44 |
| 8.34 | 7.21 | 7.99  | 8.75  | 8.02 | 7.76 | 7.38 | 9.14  | 6.44 |
| 8.43 | 7.02 | 7.62  | 8.81  | 8.13 | 7.85 | 7.57 | 9.53  | 6.56 |
| 8.02 | 7.1  | 7.73  | 9.03  | 8.07 | 8.05 | 7.49 | 9.41  | 6.39 |
| 8.02 | 6.72 | 7.67  | 8.93  | 8.31 | 8.21 | 7.41 | 9.29  | 6.69 |
| 7.73 | 7.7  | 8.32  | 8.46  | 8.05 | 7.84 | 7.63 | 8.77  | 6.39 |
| 8.3  | 6.85 | 8.43  | 8.49  | 9.09 | 8.01 | 7.75 | 9.16  | 7.28 |
| 7.87 | 6.34 | 8.46  | 8.78  | 9.36 | 8.77 | 7.74 | 9.12  | 7.63 |
| 7.84 | 7.09 | 8.64  | 8.74  | 8.36 | 8.25 | 7.44 | 9.04  | 6.59 |
| 7.6  | 1.31 | 7.55  | 8.64  | 8.63 | 7.81 | 7.46 | 9.37  | 8.88 |
| 8.2  | 0.08 | 7.38  | 8.75  | 8.4  | 8.22 | 7.32 | 9.63  | 9.16 |
| 7.76 | 2.84 | 9.29  | 8.51  | 8.46 | 7.31 | 7.63 | 9.53  | 8.94 |
| 7.5  | 7.12 | 7.93  | 8.5   | 7.42 | 7.53 | 7.3  | 8.88  | 6.46 |
| 8.23 | 6.97 | 8.33  | 8.66  | 7.69 | 7.51 | 7.13 | 8.94  | 6.89 |
| 8.27 | 6.74 | 7.87  | 8.73  | 7.69 | 7.5  | 6.93 | 8.9   | 7.01 |
| 7.64 | 6.53 | 6.79  | 8.13  | 7.96 | 6.94 | 7.56 | 8.81  | 6.81 |

<https://mc.manuscriptcentral.com/gut>



|    |      |      |       |       |      |       |      |      |      |
|----|------|------|-------|-------|------|-------|------|------|------|
| 1  |      |      |       |       |      |       |      |      |      |
| 2  | 7.47 | 6.7  | 6.67  | 8.06  | 8.17 | 7.3   | 7.62 | 8.92 | 6.99 |
| 3  | 8.2  | 7.67 | 8.4   | 8.51  | 7.44 | 7.94  | 8.07 | 8.9  | 6.06 |
| 4  | 8.13 | 4.15 | 8.52  | 8.72  | 8.86 | 6.95  | 8.11 | 8.69 | 7.12 |
| 5  | 8.43 | 2.88 | 8.31  | 9.93  | 9.36 | 8.93  | 8.11 | 9.43 | 8.35 |
| 6  | 8.29 | 2.49 | 8.5   | 9.29  | 9.42 | 9.4   | 7.9  | 9.34 | 7.57 |
| 7  | 7.06 | 0.41 | 9.03  | 8.9   | 8.4  | 6.91  | 8.26 | 9.17 | 7.95 |
| 8  | 7.55 | 1.13 | 6.61  | 8.67  | 8.05 | 10.57 | 7.71 | 9.37 | 8.24 |
| 9  | 7.59 | 2.08 | 7.35  | 8.58  | 8.28 | 10.23 | 7.33 | 9.47 | 8.72 |
| 10 | 8.14 | 5.08 | 11.49 | 9.58  | 8.35 | 9.84  | 7.95 | 9.8  | 8.33 |
| 11 | 7.18 | 1.79 | 8.94  | 8.64  | 9.7  | 6.6   | 8.04 | 9.65 | 7.66 |
| 12 | 7.34 | 0.49 | 7.58  | 8.36  | 9.67 | 8.92  | 8.12 | 9.89 | 8.48 |
| 13 | 7.26 | 6.02 | 7.24  | 8.48  | 8.85 | 8.96  | 7.61 | 9.25 | 8.11 |
| 14 | 7.82 | 3.26 | 11.34 | 8.77  | 9.46 | 8.75  | 8.56 | 9.85 | 8.19 |
| 15 | 8.83 | 7.55 | 9.77  | 9.44  | 6.84 | 8.63  | 8.22 | 9.87 | 5.77 |
| 16 | 7.18 | 3.12 | 7.11  | 7.71  | 9.25 | 5.53  | 7.16 | 9.65 | 9.74 |
| 17 | 6.78 | 0    | 6.26  | 7.99  | 9.44 | 5.23  | 7.14 | 9.68 | 9.93 |
| 18 | 7.12 | 2.52 | 7.04  | 7.99  | 9.31 | 6.55  | 7.27 | 9.5  | 9.8  |
| 19 | 8.05 | 0.43 | 6.22  | 8.84  | 8.69 | 8.1   | 7.61 | 8.96 | 8.57 |
| 20 | 7.65 | 5.58 | 7.35  | 8.87  | 8.16 | 8.3   | 7.09 | 8.65 | 7.88 |
| 21 | 7.71 | 4.2  | 7.27  | 9.09  | 8.51 | 8.23  | 7.16 | 8.8  | 8.32 |
| 22 | 7.49 | 6.75 | 14.06 | 8.49  | 6.16 | 7.16  | 7.75 | 8.97 | 5.16 |
| 23 | 6.19 | 1.46 | 6.68  | 8.29  | 9.11 | 5.78  | 7.41 | 9.36 | 6.67 |
| 24 | 6.6  | 1.54 | 7.59  | 8.5   | 9.01 | 6.96  | 8.04 | 9.48 | 7.03 |
| 25 | 7.73 | 1.18 | 9.27  | 8.9   | 8.93 | 7.88  | 7.78 | 8.8  | 7.56 |
| 26 | 8.21 | 2.49 | 10.63 | 8.65  | 8.95 | 7.35  | 7.69 | 8.81 | 7.56 |
| 27 | 7.76 | 0.54 | 9.04  | 8.99  | 8.85 | 7.05  | 8.21 | 8.79 | 7.75 |
| 28 | 7.96 | 7.74 | 8.41  | 8.87  | 6.58 | 7.85  | 7.37 | 8.85 | 5.39 |
| 29 | 7.88 | 7.78 | 8.4   | 8.96  | 5.76 | 7.81  | 7.09 | 8.96 | 5.72 |
| 30 | 7.81 | 7.74 | 8.02  | 8.59  | 4.94 | 8.03  | 7.29 | 8.71 | 4.35 |
| 31 | 7.41 | 1.01 | 6.75  | 8.35  | 7.87 | 6.92  | 7.2  | 8.01 | 6.72 |
| 32 | 6.11 | 3.29 | 7.33  | 8.19  | 8.11 | 6.52  | 6.72 | 8.34 | 7    |
| 33 | 6.28 | 4.86 | 7.82  | 8.32  | 8    | 7.34  | 7.47 | 8.25 | 6.94 |
| 34 | 7.01 | 2.96 | 7.65  | 8.54  | 7.94 | 7.34  | 7.09 | 8.04 | 6.55 |
| 35 | 7.44 | 7.08 | 8.04  | 8.32  | 5.21 | 7.02  | 6.75 | 7.98 | 5.45 |
| 36 | 7.03 | 7.22 | 7.46  | 8.1   | 5.16 | 6.71  | 6.63 | 8.01 | 5.21 |
| 37 | 6.87 | 6.48 | 7.24  | 7.71  | 6.08 | 6.85  | 6.57 | 7.95 | 5.34 |
| 38 | 8.27 | 7.24 | 8.43  | 8.09  | 5.25 | 7.71  | 7.24 | 8.48 | 4.37 |
| 39 | 7.4  | 7.04 | 7.66  | 7.86  | 5.51 | 7.17  | 6.46 | 7.86 | 5.14 |
| 40 | 7.21 | 7.31 | 7.07  | 8     | 5.18 | 7     | 6.42 | 8.05 | 5.56 |
| 41 | 6.89 | 7.31 | 7.15  | 7.92  | 5.22 | 7.09  | 6.67 | 8.09 | 4.77 |
| 42 | 8.58 | 4    | 9.11  | 6.73  | 5.22 | 6.11  | 6.22 | 9.07 | 4.41 |
| 43 | 8.09 | 7.9  | 8.63  | 8.66  | 6.38 | 7.86  | 7.4  | 9.02 | 5.3  |
| 44 | 8.54 | 8.22 | 8.72  | 8.9   | 6.29 | 8.37  | 7.39 | 9.09 | 4.75 |
| 45 | 7.64 | 6.77 | 7.98  | 8.46  | 7.87 | 7.73  | 7.19 | 8.99 | 6.91 |
| 46 | 8.23 | 7.76 | 8.46  | 8.6   | 6.52 | 7.97  | 7.33 | 8.89 | 5.07 |
| 47 | 7.8  | 7.07 | 8.29  | 8.74  | 6.93 | 7.89  | 7.42 | 8.85 | 6.04 |
| 48 | 8.46 | 7.77 | 8.65  | 9.28  | 6.02 | 8.02  | 7.7  | 9.04 | 5.38 |
| 49 | 8.25 | 7.61 | 8.21  | 9.26  | 5.75 | 7.96  | 7.64 | 9    | 5.03 |
| 50 | 8.63 | 7.58 | 8.86  | 8.76  | 5.83 | 8.31  | 7.77 | 9.03 | 5.03 |
| 51 | 8.35 | 6.04 | 6.61  | 12.16 | 7.6  | 8.29  | 7.5  | 8.08 | 6.89 |
| 52 | 6.94 | 5.97 | 6.53  | 11.42 | 7.94 | 8.13  | 7.13 | 8.21 | 7.39 |
| 53 | 7.21 | 5.99 | 7.25  | 11.24 | 7.76 | 7.77  | 6.72 | 8.18 | 7.58 |

1  
2  
3  
4  
5  
6  
7  
8  
9  
10  
11  
12  
13  
14  
15  
16  
17  
18  
19  
20  
21  
22  
23  
24  
25  
26  
27  
28  
29  
30  
31  
32  
33  
34  
35  
36  
37  
38  
39  
40  
41  
42  
43  
44  
45  
46  
47  
48  
49  
50  
51  
52  
53  
54  
55  
56  
57  
58  
59  
60

|      |      |       |       |      |       |      |       |      |
|------|------|-------|-------|------|-------|------|-------|------|
| 7.91 | 6.2  | 7.5   | 11.45 | 7.6  | 7.98  | 7.2  | 8.34  | 7.28 |
| 7.14 | 6.27 | 8.34  | 8.42  | 8.93 | 9.99  | 8.49 | 9.93  | 7.68 |
| 7.34 | 5.88 | 8.3   | 8.52  | 9.08 | 8.78  | 8.28 | 9.87  | 7.94 |
| 7.7  | 6.23 | 7.97  | 8.43  | 8.81 | 9.2   | 7.88 | 9.84  | 7.8  |
| 7.73 | 5.72 | 7.91  | 8.69  | 8.81 | 8.86  | 7.96 | 9.47  | 7.69 |
| 7.98 | 6.45 | 8.59  | 8.33  | 8.8  | 9.34  | 8.07 | 9.7   | 8.03 |
| 7.89 | 1.84 | 9.17  | 8.79  | 9.17 | 8.44  | 8.43 | 10.32 | 9.07 |
| 7.87 | 2.56 | 8.42  | 8.7   | 8.99 | 8.34  | 8.48 | 9.87  | 8.96 |
| 8.13 | 3.06 | 10.02 | 9.59  | 9.26 | 8     | 8.5  | 9.76  | 8.48 |
| 7.63 | 4.67 | 9.05  | 9.14  | 9.35 | 11.21 | 7.42 | 10.24 | 9.24 |
| 8.22 | 4.69 | 8.69  | 9.26  | 9.07 | 9.99  | 6.67 | 9.81  | 8.54 |
| 9.04 | 4.71 | 8.37  | 9.22  | 9.09 | 9.37  | 6.67 | 10.02 | 8.59 |
| 8.11 | 3.23 | 8.62  | 9.46  | 9.18 | 10.65 | 7.14 | 9.97  | 8.92 |
| 7.47 | 5.59 | 7.25  | 8.03  | 8.24 | 8.27  | 7.24 | 9.13  | 7.38 |
| 7.62 | 1.09 | 7.83  | 8.26  | 8.74 | 8.23  | 7.68 | 9.33  | 8.02 |
| 7.91 | 5.9  | 9.54  | 8.87  | 8.02 | 7.67  | 7.17 | 9.02  | 7.02 |
| 6.89 | 3.32 | 8.78  | 8.24  | 8.95 | 7.6   | 7.47 | 9.06  | 7.28 |
| 7.63 | 1.67 | 7.34  | 8.8   | 8.69 | 8.23  | 7.19 | 9.36  | 8.38 |
| 8.03 | 0.52 | 8.34  | 8.54  | 8.95 | 7.21  | 7.29 | 9.44  | 7.66 |
| 7.21 | 0.93 | 7.36  | 8.53  | 8.54 | 6.64  | 7.68 | 9.17  | 9.69 |
| 8.54 | 0.54 | 6.89  | 8.9   | 8.14 | 8.57  | 7.36 | 8.96  | 8.9  |
| 7.5  | 1.48 | 6.39  | 8.66  | 8.59 | 7.93  | 7.47 | 8.55  | 8.46 |
| 7.6  | 5.28 | 7.79  | 7.98  | 8.57 | 8.06  | 8.21 | 9.31  | 7.58 |
| 7.45 | 5.25 | 7.36  | 7.51  | 8.92 | 7.9   | 8.25 | 9.22  | 8.02 |
| 7.85 | 3.15 | 11.05 | 8.96  | 8.7  | 8.1   | 8.98 | 9.92  | 8.44 |
| 6.47 | 0.36 | 6.92  | 7.55  | 7.98 | 5.49  | 6.85 | 7.89  | 6.22 |
| 7.15 | 2.38 | 7.15  | 7.2   | 7.74 | 6.55  | 6.94 | 7.99  | 6.43 |
| 6.95 | 2.09 | 7.75  | 7.43  | 7.97 | 6.27  | 6.49 | 7.94  | 6.48 |
| 7.54 | 1.9  | 7.6   | 8.65  | 7.48 | 7.11  | 5.22 | 8.29  | 7.29 |
| 7.37 | 7.04 | 7.4   | 7.8   | 5.46 | 7.22  | 6.08 | 7.89  | 4.57 |
| 7.24 | 6.42 | 7.71  | 7.83  | 6.5  | 7     | 6.76 | 7.9   | 5.58 |
| 7.53 | 7.05 | 7.36  | 7.91  | 5.28 | 7.67  | 6.38 | 7.96  | 5.34 |
| 7.43 | 6.81 | 7.31  | 7.7   | 5.71 | 7.15  | 6.45 | 7.54  | 5.2  |
| 6.56 | 5.17 | 6.7   | 7.7   | 6.89 | 6.68  | 6.34 | 8.01  | 5.79 |
| 6.68 | 5.98 | 7.03  | 7.54  | 6.68 | 6.81  | 6.23 | 8.02  | 5.39 |
| 6.76 | 6.07 | 7.23  | 7.84  | 6.57 | 6.49  | 5.85 | 7.69  | 5.55 |
| 6.65 | 5.42 | 6.91  | 8.05  | 7.02 | 6.4   | 6.01 | 7.94  | 5.56 |
| 4.81 | 0.35 | 7.95  | 7.05  | 9.14 | 6.21  | 8.25 | 8.58  | 6.58 |
| 9.85 | 4.46 | 8.9   | 8.69  | 9.02 | 7.77  | 8.05 | 9.66  | 8.4  |
| 6.28 | 0.42 | 7.95  | 6.79  | 9.09 | 6.61  | 8.29 | 9.74  | 8.1  |
| 6.93 | 3.23 | 10.89 | 7.32  | 8.72 | 5.93  | 9.03 | 10.05 | 8.07 |
| 7.73 | 5.25 | 7.81  | 8.45  | 8.78 | 7.46  | 7.04 | 8.78  | 7.74 |
| 7.1  | 4.51 | 11.22 | 7.51  | 8.83 | 7.1   | 8.68 | 9.76  | 6.83 |
| 7.42 | 0    | 7.7   | 8.29  | 9.11 | 7.82  | 7.48 | 9.36  | 8.9  |
| 7.92 | 0    | 7.86  | 7.94  | 9.53 | 8.23  | 7.15 | 9.34  | 8.85 |
| 7.21 | 6.46 | 5.97  | 10.11 | 9.99 | 8.17  | 7.35 | 9.27  | 7.86 |
| 7.52 | 5.79 | 7.9   | 9.46  | 9.28 | 8.27  | 7.26 | 9.27  | 7.89 |
| 7.29 | 4.92 | 7.32  | 9.71  | 9.93 | 8.44  | 7.38 | 9.25  | 8.29 |
| 7.45 | 6.04 | 7.67  | 9.47  | 9.28 | 8.19  | 6.68 | 8.89  | 7.85 |
| 6.86 | 1.89 | 6.57  | 7.73  | 8.08 | 7.18  | 7.13 | 8.55  | 7.75 |
| 6.14 | 4.7  | 6.85  | 7.51  | 7.42 | 7.27  | 6.2  | 8.42  | 7.1  |
| 6.14 | 4.83 | 6.94  | 7.79  | 7.21 | 7.11  | 6.55 | 8.15  | 6.78 |

<https://mc.manuscriptcentral.com/gut>

1  
2  
3  
4  
5  
6  
7  
8  
9  
10  
11  
12  
13  
14  
15  
16  
17  
18  
19  
20  
21  
22  
23  
24  
25  
26  
27  
28  
29  
30  
31  
32  
33  
34  
35  
36  
37  
38  
39  
40  
41  
42  
43  
44  
45  
46  
47  
48  
49  
50  
51  
52  
53  
54  
55  
56  
57  
58  
59  
60

|      |      |       |      |      |      |      |      |      |
|------|------|-------|------|------|------|------|------|------|
| 6.08 | 0.79 | 7.33  | 8.42 | 7.56 | 7.3  | 7.02 | 8.68 | 7.54 |
| 7.7  | 3.42 | 8.02  | 7.83 | 9.01 | 6.77 | 6.35 | 8.78 | 7.65 |
| 7.75 | 3.59 | 8     | 7.5  | 8.55 | 6.59 | 6.05 | 8.67 | 7.79 |
| 6.88 | 3.66 | 7.74  | 7.03 | 8.82 | 5.81 | 6.74 | 8.67 | 7.67 |
| 7.58 | 6.95 | 9.49  | 8.54 | 5.8  | 6.98 | 6.88 | 8.05 | 3.88 |
| 7.54 | 6.41 | 6.79  | 9.04 | 8.21 | 8.98 | 7.5  | 8.64 | 8.33 |
| 5.61 | 7.08 | 5.32  | 8.86 | 8.14 | 9.15 | 7.28 | 8.67 | 8.09 |
| 5.73 | 6.97 | 5.76  | 8.91 | 8.13 | 9.37 | 7.19 | 8.82 | 8.19 |
| 7.55 | 7.25 | 7.99  | 8.67 | 4.8  | 7.52 | 7.07 | 8.44 | 4.08 |
| 7.84 | 6.54 | 7.51  | 8.02 | 7.24 | 7.23 | 7    | 8.31 | 6.31 |
| 6.78 | 1.24 | 7.32  | 8.22 | 8.47 | 6.84 | 7.05 | 8.62 | 6.82 |
| 7.12 | 5.14 | 7.52  | 8.68 | 7.98 | 7.56 | 6.53 | 8.82 | 6.93 |
| 7.29 | 1.89 | 7.89  | 8.62 | 8.31 | 7.96 | 7.12 | 8.78 | 7.47 |
| 7.24 | 4.21 | 7.69  | 8.6  | 8.16 | 7.22 | 6.67 | 8.59 | 7.06 |
| 8.27 | 2.54 | 10.75 | 8.07 | 7.75 | 9.53 | 9.11 | 9.59 | 9.04 |
| 6.05 | 2.8  | 7.99  | 7.49 | 8.98 | 6.65 | 7.39 | 8.84 | 8.43 |
| 6.6  | 4.91 | 6.95  | 7.31 | 8.07 | 6.57 | 7.12 | 8.43 | 8.04 |
| 6.11 | 2.07 | 8.37  | 7.55 | 9.04 | 6.47 | 7.53 | 9    | 8.46 |

1  
2  
3  
4  
5  
6  
7  
8  
9  
10  
11  
12  
13  
14  
15  
16  
17  
18  
19  
20  
21  
22  
23  
24  
25  
26  
27  
28  
29  
30  
31  
32  
33  
34  
35  
36  
37  
38  
39  
40  
41  
42  
43  
44  
45  
46  
47  
48  
49  
50  
51  
52  
53  
54  
55  
56  
57  
58  
59  
60

| ELF3  | ELK3 | EMCN | EMILIN1 | EMILIN3 | EMP3 | ENO1  | ENO2 | ENO3 |
|-------|------|------|---------|---------|------|-------|------|------|
| 11.27 | 7.49 | 6.57 | 7.64    | 7.13    | 7.44 | 9.14  | 7.57 | 5.39 |
| 12    | 7.24 | 6.86 | 7.92    | 6.26    | 6.99 | 10.1  | 7.45 | 4.79 |
| 11.55 | 7.3  | 6.98 | 7.8     | 6.61    | 7.42 | 10.22 | 7.53 | 5.4  |
| 12.29 | 7.76 | 6.95 | 9.53    | 3.64    | 7.81 | 10.3  | 7.45 | 4.93 |
| 8.41  | 7.79 | 7.45 | 5.96    | 8.1     | 6.37 | 7.97  | 8.38 | 6.84 |
| 12.12 | 7.24 | 6.13 | 7.77    | 5.95    | 7.21 | 9.67  | 7.91 | 5.01 |
| 12.41 | 7.28 | 5.9  | 7.63    | 6.11    | 7.49 | 9.81  | 7.71 | 5.38 |
| 13.01 | 7.23 | 4.48 | 9.41    | 2.39    | 7.95 | 10.97 | 8.37 | 4.72 |
| 11.48 | 6.34 | 4.95 | 9.06    | 0.37    | 8.05 | 10.61 | 7.49 | 5.76 |
| 12.46 | 6.91 | 5.91 | 8.01    | 6.4     | 6.74 | 10.48 | 7.74 | 4.61 |
| 12.31 | 6.21 | 5.29 | 8.41    | 1.38    | 7.5  | 10.92 | 6.51 | 4.19 |
| 12.68 | 7.04 | 6.54 | 9.28    | 3       | 8.15 | 11.14 | 7.54 | 3.85 |
| 11.79 | 6.78 | 6.17 | 7.63    | 7.53    | 6.73 | 9.84  | 7.04 | 5.9  |
| 11.29 | 7.51 | 6.73 | 8.51    | 7.49    | 7.63 | 9.93  | 7.36 | 5.4  |
| 11.83 | 7.47 | 5.23 | 10.5    | 2.77    | 8.4  | 10.94 | 7.96 | 6.09 |
| 12.58 | 7.19 | 6.9  | 8.58    | 7.13    | 7.79 | 10.48 | 8.78 | 5.53 |
| 12.79 | 7.48 | 6.75 | 8.71    | 7.15    | 7.93 | 10.36 | 8.48 | 5.46 |
| 12.1  | 7.7  | 6.89 | 9.07    | 6.38    | 7.9  | 11.03 | 9.26 | 5.52 |
| 12.09 | 8.08 | 5.98 | 9.35    | 3.22    | 8.65 | 9.98  | 7.35 | 6.2  |
| 12.62 | 7.46 | 6.82 | 8.72    | 2.89    | 8.08 | 10.39 | 6.95 | 5.65 |
| 12.02 | 8.08 | 7.28 | 9.29    | 2.67    | 8.73 | 10.23 | 7.57 | 5.91 |
| 13.25 | 7.67 | 6.38 | 9.87    | 1.73    | 8.11 | 10.61 | 7.79 | 4.24 |
| 13.44 | 7.49 | 6.37 | 9.44    | 4.01    | 7.9  | 10.66 | 7.33 | 4.84 |
| 13.31 | 7.42 | 6.18 | 9.86    | 3.8     | 8.08 | 10.69 | 8.19 | 4.65 |
| 8.71  | 5.6  | 4.82 | 6.98    | 3.43    | 7.61 | 11.76 | 7.19 | 6.01 |
| 12.72 | 6.32 | 5.94 | 7.34    | 2.13    | 7.28 | 11.26 | 6.74 | 5.13 |
| 12.72 | 6.38 | 5.77 | 6.84    | 3.11    | 7.3  | 11.1  | 6.59 | 5.33 |
| 12.54 | 7.25 | 6.14 | 7.34    | 6.14    | 7.58 | 10.48 | 7.7  | 5.82 |
| 11.63 | 7.51 | 5.74 | 6.8     | 6.96    | 6.7  | 10.86 | 7.59 | 5.53 |
| 11.52 | 7.52 | 6.61 | 7.79    | 6.91    | 7.22 | 10.82 | 7.67 | 5.53 |
| 11.82 | 7.5  | 6.35 | 6.87    | 6.72    | 6.88 | 10.64 | 7.85 | 5.44 |
| 11.33 | 7.83 | 6.92 | 7.8     | 7.71    | 7.37 | 10.23 | 8.28 | 5.92 |
| 6.45  | 8.08 | 6.25 | 6.94    | 4.81    | 8    | 9.24  | 8.02 | 5.95 |
| 12.62 | 7.25 | 5.76 | 9.19    | 3.23    | 8.19 | 9.95  | 8.73 | 5.23 |
| 12.91 | 7.04 | 5.66 | 8.58    | 3.31    | 7.54 | 10.3  | 8.84 | 4.97 |
| 12.7  | 7.17 | 6.17 | 9.5     | 2.79    | 7.95 | 9.75  | 8.1  | 5.28 |
| 9.45  | 6.35 | 4.35 | 7.85    | 0.45    | 7.47 | 10.84 | 7.21 | 4.9  |
| 10.39 | 6.33 | 4.93 | 7.82    | 0.4     | 7.85 | 10.98 | 7.54 | 4.4  |
| 8.62  | 7    | 5.01 | 8.61    | 2.37    | 8.14 | 10.31 | 7.69 | 5.12 |
| 9.36  | 6.3  | 5.33 | 8.44    | 2.55    | 8.13 | 10.32 | 7.46 | 4.65 |
| 11.02 | 6.96 | 6    | 7.46    | 7.28    | 6.79 | 8.76  | 7.74 | 5.13 |
| 11.16 | 6.67 | 6.07 | 7.63    | 7.01    | 6.51 | 9.25  | 7.87 | 5.18 |
| 10.41 | 6.31 | 5.77 | 7.35    | 7.03    | 6.5  | 8.91  | 7.39 | 5.08 |
| 11.48 | 6.5  | 4.72 | 7.49    | 5.72    | 6.73 | 9.44  | 7.14 | 4.34 |
| 11.36 | 4.45 | 2.86 | 8.74    | 5.67    | 6.45 | 11.71 | 8.59 | 3.86 |
| 11.51 | 5.77 | 5.87 | 8.04    | 3.77    | 7.23 | 9.66  | 7.67 | 3.9  |
| 11.64 | 6.39 | 6.49 | 8.57    | 2.58    | 7.36 | 9.8   | 7.99 | 3.58 |
| 11.39 | 6.76 | 6.69 | 9.37    | 2.13    | 7.56 | 9.3   | 7.96 | 3.71 |
| 12.23 | 7.13 | 4.88 | 8.67    | 2.63    | 8.58 | 11.1  | 7.93 | 4.22 |
| 11.72 | 7.36 | 5.68 | 8.97    | 2.01    | 8.61 | 11.33 | 7.9  | 4.1  |
| 11.63 | 6.54 | 5.58 | 8.1     | 1.5     | 8.02 | 11.26 | 7.1  | 4.67 |

<https://mc.manuscriptcentral.com/gut>

|    |       |       |      |      |      |      |       |      |      |
|----|-------|-------|------|------|------|------|-------|------|------|
| 1  |       |       |      |      |      |      |       |      |      |
| 2  | 11.55 | 7.2   | 5.4  | 9.25 | 2.08 | 8.43 | 11.26 | 8.06 | 5.08 |
| 3  | 13.36 | 7.49  | 5.52 | 7.23 | 6.46 | 6.96 | 10.45 | 8.34 | 5.7  |
| 4  | 12.86 | 7.59  | 6.28 | 7.74 | 7.45 | 7.27 | 9.99  | 7.96 | 5.97 |
| 5  | 12.61 | 7.45  | 6.08 | 7.64 | 7.17 | 7.04 | 10.12 | 7.67 | 5.41 |
| 6  | 12.41 | 7.53  | 6.41 | 7.86 | 7.52 | 7.33 | 10.01 | 7.95 | 5.7  |
| 7  | 11.5  | 6.94  | 5.48 | 7.98 | 4.93 | 7.89 | 10.85 | 8.49 | 6.16 |
| 8  | 12.23 | 7.14  | 5.89 | 8.04 | 1.83 | 7.67 | 11.2  | 8.39 | 5.29 |
| 9  | 12.42 | 5.91  | 4.88 | 6.78 | 2.46 | 6.39 | 11.4  | 8.33 | 5.45 |
| 10 | 13.17 | 6.74  | 5.76 | 8.75 | 1.44 | 7.48 | 11.27 | 8.89 | 5.72 |
| 11 | 11.95 | 6.45  | 4.87 | 6.73 | 2.17 | 7.28 | 11.5  | 9.23 | 6.34 |
| 12 | 11.85 | 6.79  | 5.24 | 7.13 | 2.13 | 7.5  | 10.85 | 7.98 | 6.1  |
| 13 | 11.83 | 6.35  | 5.27 | 6.65 | 1.4  | 7.56 | 11.13 | 8.02 | 5.99 |
| 14 | 11.44 | 6.23  | 4.98 | 7.93 | 2.56 | 7.58 | 11    | 8.52 | 5.56 |
| 15 | 10.61 | 10.28 | 6.74 | 8.74 | 6.15 | 7.47 | 9.96  | 7.74 | 5.15 |
| 16 | 11.03 | 8.48  | 6.81 | 9.24 | 4.49 | 8.11 | 11.32 | 7.85 | 7    |
| 17 | 10.62 | 7.99  | 6.77 | 8.51 | 6.06 | 7.91 | 10.98 | 8.24 | 6.18 |
| 18 | 9.35  | 9.5   | 8.42 | 7.13 | 6.86 | 8.6  | 8.73  | 9.24 | 8.04 |
| 19 | 9.19  | 9.47  | 8.5  | 7.11 | 7.31 | 8.04 | 8.8   | 8.87 | 8.02 |
| 20 | 11.91 | 7.02  | 5.5  | 6.14 | 6.77 | 6.16 | 11.31 | 6.96 | 5.66 |
| 21 | 12.37 | 7     | 5.86 | 5.9  | 6.87 | 5.83 | 11.36 | 6.93 | 5.72 |
| 22 | 11.93 | 7.57  | 5.99 | 7.13 | 7.06 | 6.51 | 10.88 | 7.34 | 5.78 |
| 23 | 12.65 | 7.29  | 6.48 | 8.41 | 2.1  | 7.25 | 10.44 | 8.79 | 4.31 |
| 24 | 12.63 | 7.23  | 6.62 | 7.99 | 5.32 | 7.07 | 10.09 | 8.67 | 4.67 |
| 25 | 11.38 | 6.96  | 7.05 | 7.65 | 7.82 | 6.91 | 9.03  | 8.29 | 5.63 |
| 26 | 13    | 7.88  | 5.85 | 8.47 | 3.96 | 8.23 | 10.65 | 7.39 | 5.22 |
| 27 | 13.17 | 8.05  | 5.4  | 8.9  | 3.74 | 8.31 | 10.79 | 7.71 | 5.25 |
| 28 | 13.04 | 8.06  | 5.21 | 9.28 | 3.5  | 8.78 | 11    | 8.79 | 5.5  |
| 29 | 12.52 | 7.25  | 6.31 | 7.98 | 7.13 | 7.83 | 11.07 | 7.03 | 5.75 |
| 30 | 12.53 | 7.08  | 5.96 | 8.27 | 6.82 | 7.77 | 11.2  | 7.18 | 5.62 |
| 31 | 12.19 | 7.26  | 6.22 | 8.27 | 7.39 | 7.73 | 11.01 | 7.45 | 5.58 |
| 32 | 13.24 | 7.63  | 6.93 | 7.48 | 7.53 | 7.44 | 9.86  | 8.02 | 5.9  |
| 33 | 12.86 | 7.41  | 6.62 | 7.77 | 7.68 | 6.84 | 10.34 | 7.64 | 6.41 |
| 34 | 13.04 | 7.72  | 6.51 | 7.45 | 7.98 | 6.84 | 10.16 | 8.18 | 6.06 |
| 35 | 11.55 | 8.15  | 6.39 | 8.7  | 7.5  | 7.64 | 10.6  | 8.63 | 5.61 |
| 36 | 11.89 | 8.16  | 6.48 | 8.13 | 7.4  | 7.76 | 10.8  | 8.54 | 5.2  |
| 37 | 11.5  | 8.2   | 6.77 | 9.22 | 6.83 | 8.17 | 10.8  | 8.57 | 5.41 |
| 38 | 11.87 | 7.72  | 7.18 | 8.34 | 7.5  | 7.37 | 9.68  | 8.09 | 5.61 |
| 39 | 11.87 | 7.72  | 7.18 | 8.34 | 7.5  | 7.37 | 9.68  | 8.09 | 5.61 |
| 40 | 13.44 | 7.35  | 6.69 | 8.38 | 6.45 | 7.02 | 10.28 | 7.99 | 5.64 |
| 41 | 12.84 | 7.42  | 6.97 | 8.84 | 7.55 | 7.53 | 10.03 | 8.49 | 5.67 |
| 42 | 13.17 | 7.7   | 6.89 | 9.01 | 6.71 | 7.26 | 9.94  | 8.33 | 5.41 |
| 43 | 11.06 | 7.26  | 6.66 | 6.08 | 7.52 | 7.11 | 8.96  | 7.95 | 5.88 |
| 44 | 12.54 | 6.97  | 6.64 | 8.28 | 7.23 | 7.3  | 9.82  | 7.3  | 6.18 |
| 45 | 12.62 | 6.76  | 6.27 | 7.63 | 7.16 | 6.97 | 10.12 | 7.22 | 6.16 |
| 46 | 11.29 | 7.37  | 7.07 | 8.51 | 7.51 | 7.31 | 9.53  | 7.95 | 6.8  |
| 47 | 13.18 | 7.01  | 5.01 | 9.09 | 2.73 | 7.76 | 11.48 | 7.15 | 5.19 |
| 48 | 13.17 | 6.73  | 5.12 | 8.12 | 2.4  | 7.11 | 11.67 | 7.52 | 5.5  |
| 49 | 12.77 | 7.48  | 4.77 | 9.46 | 2.1  | 8.27 | 11.37 | 6.98 | 5.32 |
| 50 | 9.83  | 7.32  | 6.74 | 6.9  | 7.35 | 7.31 | 8.87  | 7.85 | 6.2  |
| 51 | 10.69 | 7.98  | 6.93 | 8.37 | 7.22 | 7.34 | 9.12  | 8.06 | 5.47 |
| 52 | 11.01 | 7.36  | 6.78 | 8.49 | 7.64 | 7.11 | 9.17  | 8.14 | 5.7  |
| 53 | 11.7  | 6.46  | 6.59 | 7.37 | 6.94 | 6.72 | 9.26  | 7.42 | 5.53 |

1  
2  
3  
4  
5  
6  
7  
8  
9  
10  
11  
12  
13  
14  
15  
16  
17  
18  
19  
20  
21  
22  
23  
24  
25  
26  
27  
28  
29  
30  
31  
32  
33  
34  
35  
36  
37  
38  
39  
40  
41  
42  
43  
44  
45  
46  
47  
48  
49  
50  
51  
52  
53  
54  
55  
56  
57  
58  
59  
60

|       |      |      |       |      |      |       |      |      |
|-------|------|------|-------|------|------|-------|------|------|
| 11.84 | 6.92 | 6.35 | 7.8   | 6.7  | 6.77 | 9.66  | 7.8  | 5.59 |
| 10.94 | 7.39 | 7.04 | 8.8   | 6.81 | 7.23 | 9.18  | 8.04 | 6.35 |
| 12.25 | 7.68 | 5.33 | 7.77  | 2.83 | 7.93 | 9.79  | 7.58 | 5.35 |
| 12.64 | 8.02 | 6.78 | 8.73  | 3.25 | 8.05 | 10.84 | 7.76 | 5.03 |
| 12.55 | 7.69 | 6.66 | 9.57  | 3.66 | 8.6  | 10.07 | 8.38 | 5.01 |
| 10.85 | 7.53 | 5.26 | 9.03  | 2.73 | 8.11 | 10.53 | 7.48 | 5.16 |
| 12.22 | 7.06 | 4.41 | 8.24  | 1.55 | 7.79 | 10.67 | 7.23 | 4.8  |
| 11.89 | 7.55 | 5.43 | 8.64  | 0    | 7.87 | 10.93 | 7.36 | 4.71 |
| 11.97 | 8.02 | 4.49 | 11.03 | 2.49 | 8.35 | 11.79 | 8.3  | 6.4  |
| 12.95 | 6.81 | 5.18 | 8.75  | 1.79 | 8.37 | 9.9   | 6.9  | 5.04 |
| 13.23 | 5.98 | 4.08 | 7.63  | 2.08 | 6.92 | 10.2  | 7.97 | 4.49 |
| 12.59 | 6.12 | 5.56 | 6.46  | 6.9  | 6.51 | 9.76  | 8.19 | 5.51 |
| 12.96 | 7.12 | 4.26 | 10.82 | 5.07 | 7.96 | 10.85 | 8.62 | 5.96 |
| 9.1   | 8.76 | 7.26 | 7.01  | 8.98 | 7.86 | 8.92  | 9.7  | 6.92 |
| 12.16 | 6.67 | 5.16 | 7.83  | 3.27 | 6.98 | 10.61 | 6.91 | 3.95 |
| 12.35 | 6.36 | 5.08 | 7.19  | 1.42 | 6.64 | 10.67 | 6.12 | 4.23 |
| 12.34 | 6.73 | 5.16 | 7.88  | 1.52 | 6.63 | 10.5  | 7.07 | 4.38 |
| 11.66 | 7.77 | 4.6  | 7.95  | 1.76 | 7.97 | 10.73 | 8.15 | 4.99 |
| 10.6  | 7.7  | 5.47 | 8.08  | 2.67 | 7.64 | 10.44 | 8.36 | 5.63 |
| 10.93 | 7.93 | 4.98 | 8.3   | 2.2  | 7.95 | 10.88 | 8.59 | 5.42 |
| 10.12 | 7.97 | 6.16 | 11.05 | 6.16 | 6.16 | 10.75 | 6.16 | 5.16 |
| 12.25 | 6.53 | 4.69 | 6.78  | 0.13 | 6.54 | 10.78 | 7.5  | 3.78 |
| 11.81 | 7.16 | 5.18 | 7.91  | 3.12 | 7.59 | 10.52 | 7.21 | 4.54 |
| 11.66 | 7.11 | 3.99 | 9.17  | 4.35 | 7.06 | 11.39 | 7.45 | 5.09 |
| 11.4  | 7.3  | 3.91 | 10.23 | 3.49 | 7.56 | 11.16 | 7.28 | 6.19 |
| 10.78 | 7.68 | 6.1  | 9.68  | 3.35 | 8.03 | 10.62 | 7.48 | 5.35 |
| 9.44  | 8.35 | 7.42 | 6.88  | 8.49 | 6.67 | 8.31  | 8.04 | 6.21 |
| 8.11  | 8.21 | 7.54 | 5.56  | 8.57 | 6.76 | 8.12  | 8.7  | 6.72 |
| 7.47  | 7.77 | 7.67 | 6.02  | 8.34 | 6.72 | 7.77  | 8.66 | 6.35 |
| 11.57 | 6.5  | 5.53 | 8.13  | 1.01 | 6.7  | 9.29  | 5.92 | 2.01 |
| 10.65 | 6.19 | 5.88 | 9.67  | 3.29 | 7.74 | 9.48  | 7.4  | 2.91 |
| 11.07 | 6.65 | 5.28 | 8.95  | 3.28 | 6.58 | 10.21 | 6.77 | 3.81 |
| 11.03 | 7.17 | 6.28 | 8.96  | 0.16 | 7.13 | 9.23  | 7.03 | 4.33 |
| 7.78  | 7.74 | 6.62 | 6.94  | 6.72 | 6.62 | 7.74  | 7.75 | 5.84 |
| 8.55  | 6.76 | 6.5  | 5.54  | 7.74 | 5.98 | 7.63  | 7.53 | 5.81 |
| 9.22  | 6.87 | 5.93 | 6.02  | 7.12 | 5.91 | 8.05  | 7.69 | 5.27 |
| 7.76  | 8.29 | 7.41 | 5.37  | 6.06 | 6.87 | 7.27  | 7.88 | 6.53 |
| 7.38  | 7.44 | 6.62 | 5.51  | 7.58 | 6.09 | 7.64  | 7.68 | 5.79 |
| 7.62  | 6.96 | 6.49 | 6.14  | 7.62 | 5.35 | 7.18  | 7.52 | 5.85 |
| 7.84  | 7.08 | 6.24 | 6.67  | 7.38 | 5.26 | 7.6   | 7.2  | 5.89 |
| 7.73  | 8.54 | 7.27 | 7.66  | 2.41 | 7.27 | 6.41  | 6.8  | 6.73 |
| 9.13  | 8.42 | 7.3  | 7.08  | 8.43 | 6.76 | 8.89  | 8.25 | 6.78 |
| 8.55  | 8.38 | 7.63 | 6.03  | 9.17 | 7.45 | 8.5   | 8.77 | 6.88 |
| 11.61 | 7.48 | 6.51 | 7.02  | 7.97 | 6.65 | 9.65  | 8.02 | 5.87 |
| 9.57  | 8.1  | 7.42 | 6.68  | 8.2  | 7.04 | 8.68  | 8.25 | 6.83 |
| 10.38 | 7.85 | 6.45 | 7.91  | 6.91 | 7    | 9.17  | 8.18 | 6.32 |
| 9.6   | 8.14 | 7.14 | 7.24  | 8.47 | 6.67 | 8.64  | 8.62 | 6.32 |
| 8.34  | 7.6  | 7.12 | 5.75  | 8.39 | 6.56 | 8.29  | 8.55 | 6.13 |
| 9.23  | 8.86 | 7.68 | 7.43  | 6.89 | 7.17 | 8.26  | 8.31 | 7.03 |
| 10.93 | 6.2  | 5.58 | 6.34  | 6.61 | 6.35 | 10.36 | 7.54 | 5.2  |
| 11.11 | 5.68 | 5.83 | 6.7   | 6.27 | 6.22 | 10.55 | 6.99 | 5.03 |
| 10.91 | 6.87 | 5.87 | 6.86  | 6.41 | 6.67 | 10.39 | 7.09 | 5.71 |

<https://mc.manuscriptcentral.com/gut>

|    |       |      |      |       |      |      |       |       |      |
|----|-------|------|------|-------|------|------|-------|-------|------|
| 1  |       |      |      |       |      |      |       |       |      |
| 2  | 11.01 | 6.79 | 5.94 | 6.59  | 6.44 | 6.64 | 9.95  | 7.29  | 5.66 |
| 3  | 13.78 | 7.72 | 6.4  | 8.46  | 5.94 | 7.61 | 10.76 | 7.57  | 5.6  |
| 4  | 13.25 | 7.85 | 6.86 | 9.01  | 6.55 | 7.9  | 10.72 | 7.94  | 5.24 |
| 5  | 13.78 | 7.66 | 6.06 | 7.44  | 7.17 | 6.99 | 10.65 | 7.15  | 5.39 |
| 6  | 13.77 | 7.79 | 6.14 | 7.63  | 6.38 | 6.89 | 10.66 | 7.37  | 4.93 |
| 7  |       |      |      |       |      |      |       |       |      |
| 8  | 12.25 | 7.67 | 6.41 | 8.08  | 4.16 | 8.42 | 10.54 | 8.2   | 6.58 |
| 9  | 13.4  | 7.72 | 5.8  | 9.34  | 4.3  | 8.42 | 12.11 | 7.71  | 6.01 |
| 10 | 13.44 | 7.32 | 5.84 | 8.61  | 3.44 | 7.92 | 12.14 | 7.78  | 5.71 |
| 11 | 12.7  | 8.09 | 6.2  | 10.69 | 4.74 | 9.18 | 11.4  | 8.52  | 5.79 |
| 12 | 13.72 | 7.89 | 6.46 | 9     | 3.76 | 8.14 | 10.73 | 10.26 | 4.57 |
| 13 | 13.26 | 7.83 | 6.84 | 8.87  | 3.97 | 8.1  | 10.32 | 9.08  | 5.29 |
| 14 | 13.46 | 7.98 | 5.84 | 9.09  | 4.38 | 8.32 | 10.18 | 8.8   | 5.03 |
| 15 | 13.71 | 7.88 | 6.23 | 8.83  | 3.65 | 7.84 | 10.32 | 9.37  | 5.46 |
| 16 |       |      |      |       |      |      |       |       |      |
| 17 | 12.04 | 6.99 | 5.78 | 7.34  | 6.09 | 7.13 | 11.35 | 7.71  | 5.12 |
| 18 | 13.05 | 7.07 | 5.58 | 7.66  | 2.32 | 7.42 | 11.63 | 7.4   | 3.68 |
| 19 | 11.57 | 7.11 | 6.19 | 9.77  | 6.35 | 7.62 | 11.06 | 8.24  | 5.39 |
| 20 | 10.64 | 7.53 | 6.24 | 8.72  | 0    | 8.26 | 10.03 | 7.73  | 5.12 |
| 21 | 11.99 | 7.38 | 5.8  | 8.96  | 3.99 | 8.06 | 10.94 | 7.24  | 4.37 |
| 22 |       |      |      |       |      |      |       |       |      |
| 23 | 11.53 | 7.64 | 6.84 | 9.81  | 0.52 | 8.25 | 10.46 | 7.97  | 4.52 |
| 24 | 12.44 | 6.74 | 4.57 | 7.65  | 0    | 7.77 | 10.52 | 7.84  | 4.93 |
| 25 | 12.87 | 6.89 | 4.59 | 8.74  | 2.13 | 7.64 | 10.71 | 7.8   | 4.79 |
| 26 | 12.95 | 6.27 | 4.69 | 7.6   | 0    | 6.57 | 10.34 | 7.5   | 5.26 |
| 27 | 12.17 | 7.52 | 6.19 | 8.26  | 6.63 | 7.48 | 10.05 | 8.77  | 5.35 |
| 28 | 12.74 | 7.21 | 6.29 | 8.33  | 6.48 | 7.67 | 10.38 | 9.19  | 4.93 |
| 29 | 12.85 | 7.96 | 5.74 | 11.37 | 5.74 | 8.06 | 10.81 | 8.67  | 6.32 |
| 30 | 10.35 | 6.09 | 4.45 | 7.03  | 1.36 | 6.67 | 9.56  | 6.74  | 2.95 |
| 31 | 11.48 | 6.52 | 5.38 | 7.71  | 2.79 | 6.96 | 9.13  | 6.6   | 4.7  |
| 32 | 11.59 | 5.91 | 4.01 | 7.45  | 1.76 | 6.63 | 9.87  | 6.29  | 4.35 |
| 33 |       |      |      |       |      |      |       |       |      |
| 34 | 10.85 | 7.03 | 6.29 | 8.54  | 3.48 | 7.9  | 9     | 5.9   | 3.48 |
| 35 | 7.73  | 7.25 | 5.66 | 5.34  | 7.22 | 5.22 | 7.01  | 7.22  | 5.93 |
| 36 | 9     | 6.91 | 6.04 | 7.49  | 7.18 | 5.72 | 7.9   | 7.53  | 5.53 |
| 37 | 7.42  | 6.88 | 6.72 | 5.41  | 7.31 | 4.97 | 7.38  | 7.29  | 5.53 |
| 38 | 7.85  | 7.09 | 6.2  | 6.57  | 7.04 | 5.04 | 7.63  | 7.64  | 5.71 |
| 39 | 11.15 | 6.44 | 5.36 | 5.53  | 6.81 | 5.74 | 8.79  | 6.57  | 3.94 |
| 40 | 10.42 | 7.14 | 5.91 | 6.81  | 7.39 | 6.1  | 8.1   | 7.06  | 4.75 |
| 41 | 10.19 | 6.8  | 5.98 | 7.33  | 7.31 | 6.14 | 8.14  | 7.04  | 5.09 |
| 42 | 10.23 | 7.02 | 5.96 | 8.01  | 6.69 | 6.8  | 8.22  | 7.01  | 4.69 |
| 43 |       |      |      |       |      |      |       |       |      |
| 44 | 3.94  | 7.15 | 5.05 | 7.49  | 0.35 | 8.43 | 9.94  | 7.95  | 4.52 |
| 45 | 12.86 | 6.92 | 5.37 | 8.93  | 4.05 | 7.08 | 10.3  | 6.99  | 4.92 |
| 46 | 12.48 | 6.74 | 5.17 | 8.25  | 1.42 | 7.46 | 11.06 | 6.33  | 5.06 |
| 47 | 12.23 | 7.19 | 3.82 | 10.32 | 4.23 | 7.88 | 11.83 | 6.63  | 6.04 |
| 48 | 12.17 | 7.12 | 5.58 | 7.61  | 5.55 | 7.12 | 10.51 | 7.12  | 5.43 |
| 49 | 10.9  | 8.42 | 5.51 | 10.64 | 4.51 | 7.68 | 11.42 | 5.51  | 6.83 |
| 50 | 12.46 | 6.71 | 5.6  | 9.07  | 2.68 | 7.63 | 10.81 | 7.46  | 4.68 |
| 51 | 12.91 | 6.79 | 5.46 | 9.43  | 2.26 | 7.89 | 10.37 | 7.57  | 4.94 |
| 52 | 11.91 | 5.14 | 3.85 | 2.68  | 4.59 | 5.21 | 10.94 | 8.17  | 4.68 |
| 53 | 11.72 | 6.94 | 5.54 | 8.21  | 4.44 | 7.64 | 10.79 | 8.07  | 5.07 |
| 54 | 11.76 | 5.95 | 5.45 | 8     | 3.28 | 7.46 | 10.82 | 7.95  | 3.86 |
| 55 | 11    | 6.72 | 6.45 | 8.15  | 6.76 | 7.65 | 10.4  | 8.1   | 5.47 |
| 56 | 11.76 | 5.91 | 3.89 | 8.23  | 0    | 6.82 | 9.78  | 6.58  | 3.27 |
| 57 | 10.68 | 6.14 | 5.95 | 7.57  | 4.85 | 6.64 | 8.77  | 7.07  | 3.99 |
| 58 | 10.54 | 6.55 | 5.9  | 7.6   | 5.42 | 6.6  | 8.63  | 7.12  | 4.54 |
| 59 |       |      |      |       |      |      |       |       |      |
| 60 |       |      |      |       |      |      |       |       |      |

|    |       |      |      |      |      |      |       |      |      |
|----|-------|------|------|------|------|------|-------|------|------|
| 1  |       |      |      |      |      |      |       |      |      |
| 2  | 11.42 | 5.6  | 5.37 | 9.15 | 1.79 | 6.77 | 8.85  | 6.98 | 4.25 |
| 3  | 11.89 | 6.46 | 5.27 | 8.61 | 5.01 | 7.19 | 9.58  | 6.98 | 3.68 |
| 4  | 11.07 | 5.91 | 4.91 | 7.73 | 5.34 | 6.2  | 9.11  | 7.87 | 3.76 |
| 5  | 11.15 | 5.81 | 4.95 | 7.62 | 4.19 | 6.6  | 9.17  | 6.74 | 4.74 |
| 6  | 9.42  | 7.51 | 6.41 | 8.55 | 7.7  | 5.64 | 8.42  | 8.47 | 5.64 |
| 7  | 12.28 | 6.07 | 4.65 | 7.58 | 0.57 | 7.33 | 10.61 | 7.56 | 3.96 |
| 8  | 12.28 | 5.22 | 3.71 | 6.42 | 0    | 5.84 | 10.83 | 5.68 | 4.68 |
| 9  | 12.25 | 5.11 | 3.81 | 6.25 | 0    | 5.74 | 11    | 5.5  | 4.6  |
| 10 | 7.61  | 7.76 | 6.9  | 5.73 | 8.26 | 6.23 | 7.59  | 8.11 | 6.05 |
| 11 | 10.53 | 7.26 | 6.41 | 7.68 | 7.05 | 6.69 | 8.29  | 7.51 | 5.37 |
| 12 | 10.78 | 6.79 | 4.97 | 8.55 | 0    | 7    | 9.59  | 7.12 | 4.35 |
| 13 | 10.75 | 6.75 | 6.17 | 8.56 | 5.75 | 6.84 | 9.91  | 7.73 | 3.89 |
| 14 | 10.93 | 6.64 | 5.95 | 8.95 | 3.62 | 7.24 | 9.66  | 7.2  | 4.69 |
| 15 | 10.25 | 7.27 | 6.01 | 8.96 | 3.93 | 7.19 | 9.28  | 7.28 | 4.93 |
| 16 | 13.24 | 6.24 | 3.54 | 9.94 | 2.54 | 6.94 | 11.68 | 6.79 | 6.54 |
| 17 | 10.62 | 6.37 | 4.05 | 7.77 | 2.39 | 7.55 | 9.51  | 7.21 | 4.26 |
| 18 | 10.42 | 6.63 | 5.82 | 6.82 | 4.52 | 7.07 | 8.94  | 7.12 | 4.69 |
| 19 | 10.57 | 6.56 | 3.75 | 8.11 | 1.34 | 7.47 | 9.61  | 7.39 | 5    |
| 20 |       |      |      |      |      |      |       |      |      |
| 21 |       |      |      |      |      |      |       |      |      |
| 22 |       |      |      |      |      |      |       |      |      |
| 23 |       |      |      |      |      |      |       |      |      |
| 24 |       |      |      |      |      |      |       |      |      |
| 25 |       |      |      |      |      |      |       |      |      |
| 26 |       |      |      |      |      |      |       |      |      |
| 27 |       |      |      |      |      |      |       |      |      |
| 28 |       |      |      |      |      |      |       |      |      |
| 29 |       |      |      |      |      |      |       |      |      |
| 30 |       |      |      |      |      |      |       |      |      |
| 31 |       |      |      |      |      |      |       |      |      |
| 32 |       |      |      |      |      |      |       |      |      |
| 33 |       |      |      |      |      |      |       |      |      |
| 34 |       |      |      |      |      |      |       |      |      |
| 35 |       |      |      |      |      |      |       |      |      |
| 36 |       |      |      |      |      |      |       |      |      |
| 37 |       |      |      |      |      |      |       |      |      |
| 38 |       |      |      |      |      |      |       |      |      |
| 39 |       |      |      |      |      |      |       |      |      |
| 40 |       |      |      |      |      |      |       |      |      |
| 41 |       |      |      |      |      |      |       |      |      |
| 42 |       |      |      |      |      |      |       |      |      |
| 43 |       |      |      |      |      |      |       |      |      |
| 44 |       |      |      |      |      |      |       |      |      |
| 45 |       |      |      |      |      |      |       |      |      |
| 46 |       |      |      |      |      |      |       |      |      |
| 47 |       |      |      |      |      |      |       |      |      |
| 48 |       |      |      |      |      |      |       |      |      |
| 49 |       |      |      |      |      |      |       |      |      |
| 50 |       |      |      |      |      |      |       |      |      |
| 51 |       |      |      |      |      |      |       |      |      |
| 52 |       |      |      |      |      |      |       |      |      |
| 53 |       |      |      |      |      |      |       |      |      |
| 54 |       |      |      |      |      |      |       |      |      |
| 55 |       |      |      |      |      |      |       |      |      |
| 56 |       |      |      |      |      |      |       |      |      |
| 57 |       |      |      |      |      |      |       |      |      |
| 58 |       |      |      |      |      |      |       |      |      |
| 59 |       |      |      |      |      |      |       |      |      |
| 60 |       |      |      |      |      |      |       |      |      |



1  
2  
3  
4  
5  
6  
7  
8  
9  
10  
11  
12  
13  
14  
15  
16  
17  
18  
19  
20  
21  
22  
23  
24  
25  
26  
27  
28  
29  
30  
31  
32  
33  
34  
35  
36  
37  
38  
39  
40  
41  
42  
43  
44  
45  
46  
47  
48  
49  
50  
51  
52  
53  
54  
55  
56  
57  
58  
59  
60

| ENPEP | ENPP2 | EP300 | EPAS1 | EPCAM | EPHA1 | EPHA2 | EPHB1 | EPHB3 |
|-------|-------|-------|-------|-------|-------|-------|-------|-------|
| 4.69  | 8.45  | 8     | 7.67  | 7.65  | 6.66  | 6.72  | 2.15  | 7.32  |
| 6.33  | 8.86  | 8.06  | 8.85  | 10.31 | 6.33  | 9.57  | 4.3   | 7.38  |
| 5.33  | 8.5   | 7.87  | 8.56  | 9.72  | 7.29  | 9.4   | 3.99  | 7.47  |
| 5.82  | 8.49  | 8.5   | 9.08  | 10.42 | 7.16  | 9.27  | 4.88  | 7.61  |
| 2.01  | 8.61  | 6.71  | 6.4   | 6.96  | 7.48  | 2.01  | 1.01  | 8.18  |
| 5.42  | 8.02  | 7.57  | 7.4   | 8.3   | 6.01  | 7.34  | 3.74  | 6.86  |
| 5.67  | 8.26  | 7.84  | 7.9   | 8.42  | 6.38  | 8.1   | 4.17  | 6.78  |
| 4.79  | 8.8   | 7.83  | 7.29  | 9.66  | 5.92  | 8.84  | 4.85  | 7.49  |
| 4.83  | 7.34  | 8.34  | 8.21  | 10.63 | 6.52  | 8.98  | 5.58  | 9.09  |
| 3.49  | 7.55  | 7.9   | 7.69  | 10.55 | 7.3   | 9.34  | 4.77  | 7.25  |
| 3.55  | 7.23  | 8.67  | 8.24  | 11.05 | 6.81  | 9.47  | 4.96  | 7.96  |
| 4.77  | 7.46  | 8.52  | 8.96  | 10.67 | 7.09  | 10.05 | 4.27  | 6.68  |
| 6.53  | 8.87  | 8.57  | 7.46  | 10.84 | 7.79  | 7.15  | 2.99  | 6.8   |
| 6.3   | 8.82  | 8.6   | 8.31  | 10.37 | 7.95  | 7.46  | 3.58  | 7.16  |
| 4.09  | 11.07 | 9.28  | 7.26  | 11.1  | 6.23  | 8.03  | 3.35  | 9.67  |
| 4.64  | 8.99  | 7.85  | 8.24  | 9.92  | 7.26  | 8.81  | 3.94  | 7.83  |
| 4.99  | 8.28  | 8.22  | 7.66  | 10.29 | 8.08  | 9.86  | 3.61  | 7.52  |
| 5.08  | 8.39  | 8.13  | 7.92  | 10.34 | 7.72  | 9.1   | 2.35  | 7.69  |
| 6.16  | 9.33  | 9.29  | 8.71  | 9.78  | 6.85  | 9.11  | 4.65  | 7     |
| 6.44  | 8.64  | 9.41  | 9.17  | 10.21 | 6.78  | 9.13  | 5.31  | 6.61  |
| 6.7   | 9.1   | 9.3   | 9.04  | 9.32  | 6.25  | 8.99  | 5.69  | 6.75  |
| 6.26  | 8.35  | 8.82  | 9.55  | 11.59 | 7.44  | 9.01  | 4.54  | 7.95  |
| 6.06  | 8.59  | 8.84  | 9.67  | 11.5  | 7.7   | 9.33  | 5.37  | 8.57  |
| 5.62  | 8.04  | 8.74  | 9.33  | 11.06 | 7.07  | 9.47  | 5.14  | 8.19  |
| 4.67  | 7.57  | 9.1   | 6.98  | 10.05 | 6.58  | 5.78  | 4.82  | 6.26  |
| 4.22  | 6.76  | 8.84  | 8.54  | 10.68 | 7.82  | 9.77  | 1.13  | 9.24  |
| 4.69  | 7     | 8.86  | 8.17  | 10.92 | 7.38  | 9.22  | 3.33  | 9.24  |
| 4.56  | 8.05  | 8.64  | 8.19  | 10.26 | 7.55  | 9.31  | 1.5   | 8.62  |
| 4.6   | 8.26  | 8.29  | 7.19  | 9.91  | 7.01  | 8.82  | 2.87  | 7.65  |
| 4.09  | 8.3   | 8.14  | 7.79  | 10.04 | 6.88  | 8.7   | 1.36  | 7.82  |
| 4     | 7.62  | 8.52  | 7.48  | 10.29 | 6.59  | 8.67  | 3     | 8.57  |
| 4.71  | 8.55  | 8.01  | 7.37  | 9.72  | 7.08  | 8.61  | 3.71  | 8.48  |
| 4.1   | 10.05 | 8.73  | 8.12  | 5.57  | 6.14  | 6.82  | 3.15  | 6.83  |
| 5.7   | 7.61  | 8.89  | 8.4   | 9.64  | 5.89  | 7.81  | 3.76  | 8.49  |
| 4.7   | 7.66  | 8.67  | 8.52  | 10.17 | 5.82  | 8.81  | 4.42  | 8.94  |
| 5.06  | 8.11  | 8.47  | 8.39  | 9.89  | 5.23  | 8.24  | 4.17  | 9.06  |
| 3.03  | 9.03  | 8.27  | 7.21  | 8.68  | 5.97  | 8.3   | 3.9   | 6.71  |
| 3.4   | 7.17  | 8.41  | 7.77  | 9.99  | 6.54  | 9.09  | 2.21  | 6.46  |
| 4.54  | 7.62  | 8.38  | 7.84  | 8.53  | 6.07  | 8.43  | 2.37  | 5.83  |
| 3.91  | 8.07  | 8.32  | 7.56  | 8.86  | 6.08  | 7.77  | 2.55  | 5.95  |
| 4.21  | 8.02  | 7.21  | 7.35  | 8.26  | 6.35  | 6.44  | 3.6   | 6.78  |
| 3.36  | 8.08  | 7.1   | 7.05  | 8.53  | 6.34  | 7.65  | 3.07  | 6.73  |
| 4.54  | 8     | 7.46  | 6.92  | 8.65  | 6.69  | 6.79  | 3.68  | 6.71  |
| 4.27  | 7.22  | 7.7   | 7.11  | 9.25  | 6.32  | 7.75  | 4.4   | 6.15  |
| 3.86  | 9.01  | 7.77  | 4.86  | 11.58 | 6.18  | 7.56  | 3.86  | 8.69  |
| 5.36  | 7.58  | 8.6   | 8.24  | 10.04 | 6.38  | 7.85  | 1.31  | 8.97  |
| 6.21  | 6.44  | 8.5   | 8.58  | 10    | 6.66  | 8.26  | 3.17  | 8.39  |
| 6.06  | 6.65  | 8.53  | 8.51  | 9.41  | 6.06  | 7.71  | 3.51  | 7.78  |
| 5.59  | 8.59  | 8.79  | 8.57  | 11.77 | 7.78  | 8.71  | 4.33  | 6.13  |
| 6.28  | 7.59  | 8.78  | 8.65  | 11.09 | 7.41  | 9.13  | 3.92  | 6.2   |
| 6.5   | 7.35  | 8.83  | 7.85  | 10.99 | 7.34  | 9.29  | 4.2   | 5.82  |

<https://mc.manuscriptcentral.com/gut>

|    |      |      |      |      |       |      |       |      |       |
|----|------|------|------|------|-------|------|-------|------|-------|
| 1  |      |      |      |      |       |      |       |      |       |
| 2  | 6.08 | 7.86 | 8.71 | 8.48 | 10.67 | 7.27 | 9.06  | 4.6  | 6.19  |
| 3  | 4.55 | 8.79 | 8.41 | 7.55 | 11.41 | 8.84 | 9.61  | 4.98 | 8.91  |
| 4  | 4.94 | 9.04 | 8.61 | 8.19 | 11.5  | 9.13 | 9.05  | 4.83 | 8.3   |
| 5  | 3.76 | 8.87 | 8.79 | 8.16 | 11.54 | 8.98 | 8.96  | 5.48 | 8.32  |
| 6  | 4.43 | 9.05 | 8.61 | 7.63 | 11.51 | 9.13 | 8.75  | 4.43 | 8.08  |
| 7  | 5.36 | 8.3  | 9.12 | 8.97 | 10.74 | 7.83 | 8.39  | 2.23 | 8.51  |
| 8  | 5.53 | 6.86 | 8.84 | 9.45 | 11.44 | 7.79 | 8.74  | 6.15 | 9.63  |
| 9  | 5.38 | 5.85 | 8.82 | 8.99 | 11.56 | 7.45 | 8.48  | 5    | 10.29 |
| 10 | 5.69 | 7.14 | 9.24 | 8.93 | 11.31 | 7.83 | 8.75  | 5.72 | 9.31  |
| 11 | 5.67 | 6.3  | 8.42 | 7.92 | 10.23 | 6.17 | 6.98  | 4.28 | 9.67  |
| 12 | 4.93 | 7.03 | 8.87 | 8.06 | 10.08 | 6.65 | 8.92  | 4.35 | 10.19 |
| 13 | 5.34 | 6.54 | 8.65 | 8.14 | 10.22 | 6.34 | 8.95  | 4.67 | 9.84  |
| 14 | 5.11 | 6.94 | 8.63 | 8.08 | 10.11 | 6.71 | 8.65  | 4.44 | 9.83  |
| 15 | 5.15 | 9.47 | 7.47 | 5.15 | 9.24  | 8.15 | 8.47  | 5.15 | 10.24 |
| 16 | 0.79 | 9.11 | 7.07 | 6.07 | 10.4  | 7.23 | 9.71  | 3.79 | 8.75  |
| 17 | 3.74 | 9.03 | 7.8  | 6.35 | 9.59  | 7.27 | 9.39  | 1.6  | 8.03  |
| 18 | 1.83 | 9.22 | 6.47 | 6.84 | 8.54  | 8.39 | 1.24  | 1.83 | 8.86  |
| 19 | 2.36 | 9.54 | 6.71 | 6.84 | 8.54  | 8.44 | 3.58  | 1.77 | 9.2   |
| 20 | 4.39 | 7.81 | 8.78 | 7.54 | 10.83 | 8.36 | 9.7   | 2.14 | 8.08  |
| 21 | 4.62 | 7.6  | 8.91 | 7.7  | 11.05 | 8.72 | 10.07 | 2.85 | 7.55  |
| 22 | 3.67 | 8.42 | 8.65 | 7.53 | 10.61 | 8.59 | 9.45  | 2.67 | 7.85  |
| 23 | 5.56 | 7.41 | 8.89 | 9.27 | 11.33 | 6.84 | 9.47  | 4.98 | 7.19  |
| 24 | 5.64 | 7.22 | 8.96 | 8.94 | 10.96 | 6.45 | 9.28  | 3.98 | 7.29  |
| 25 | 5.75 | 8.14 | 8.6  | 9.04 | 10.21 | 6.3  | 7.59  | 5.22 | 7.66  |
| 26 | 4.88 | 9.19 | 9.34 | 8.72 | 10.59 | 8.52 | 8.77  | 3.81 | 8.52  |
| 27 | 5.43 | 8.37 | 9.2  | 8.64 | 11.06 | 8.98 | 8.16  | 5.43 | 8.63  |
| 28 | 6.05 | 7.69 | 9.36 | 8.46 | 11.31 | 9.16 | 7.18  | 5.5  | 9.04  |
| 29 | 5.11 | 8.01 | 8.37 | 7.91 | 10.46 | 7.77 | 7.68  | 2.94 | 7.11  |
| 30 | 4.98 | 7.86 | 8.1  | 7.91 | 10.5  | 7.78 | 7.57  | 2.79 | 6.98  |
| 31 | 4.85 | 8.04 | 8.29 | 7.69 | 10.39 | 7.8  | 7.43  | 3.61 | 7.32  |
| 32 | 6.76 | 8.51 | 8.66 | 8.93 | 11.77 | 7.36 | 8.23  | 4.76 | 9.01  |
| 33 | 6.2  | 8.24 | 8.48 | 8.32 | 12.05 | 7.6  | 8.24  | 5.48 | 8.44  |
| 34 | 5.61 | 8.52 | 8.58 | 8.29 | 12.07 | 8.01 | 8.28  | 5.72 | 8.61  |
| 35 | 4.68 | 8.41 | 8.54 | 8.12 | 9.74  | 7.02 | 9.74  | 3.31 | 7.14  |
| 36 | 4.58 | 8.37 | 8.5  | 8.12 | 9.83  | 6.86 | 9.76  | 3.05 | 7.14  |
| 37 | 5.38 | 8.16 | 8.3  | 8.49 | 9.57  | 6.51 | 9.83  | 1.92 | 7.15  |
| 38 | 4.96 | 8.69 | 8.14 | 7.83 | 8.32  | 6.98 | 8.48  | 3.9  | 7.43  |
| 39 | 4.96 | 8.69 | 8.14 | 7.83 | 8.32  | 6.98 | 8.48  | 3.9  | 7.43  |
| 40 | 3.47 | 8.64 | 7.84 | 7.43 | 9.86  | 7.36 | 9.93  | 4.32 | 7.58  |
| 41 | 3.98 | 8.82 | 8.31 | 8.02 | 9.89  | 7.31 | 9.7   | 2.98 | 8.08  |
| 42 | 4.49 | 8.03 | 8.23 | 7.84 | 9.19  | 7.25 | 9.43  | 2.86 | 7.45  |
| 43 | 2.56 | 8.83 | 8.12 | 7.63 | 7.67  | 7.14 | 6.88  | 1.56 | 7.63  |
| 44 | 4.76 | 8.41 | 8.3  | 8.39 | 9.82  | 7.01 | 8.16  | 3.47 | 7.32  |
| 45 | 4.9  | 8.13 | 8.39 | 8.64 | 10.17 | 6.7  | 8.69  | 3.12 | 7.08  |
| 46 | 4.61 | 8.6  | 8.15 | 7.75 | 9.38  | 6.88 | 7.04  | 2.93 | 7.43  |
| 47 | 4.86 | 7.64 | 8.37 | 8.04 | 11.9  | 8.18 | 8.83  | 5.12 | 6.62  |
| 48 | 4.08 | 7.17 | 8.27 | 8.09 | 12.1  | 8.39 | 9.76  | 6.01 | 6.91  |
| 49 | 4.22 | 8.27 | 8.09 | 8.18 | 12.08 | 7.94 | 8.84  | 5.52 | 7.02  |
| 50 | 4.32 | 8.69 | 8.26 | 7.56 | 7.73  | 7.3  | 7.51  | 2.96 | 7.18  |
| 51 | 4.6  | 8.62 | 8.04 | 8.05 | 8.53  | 6.74 | 7.42  | 2.6  | 7.51  |
| 52 | 4.7  | 8.33 | 8    | 7.17 | 8.67  | 6.48 | 7.41  | 4.36 | 7.54  |
| 53 | 4.1  | 8.21 | 8    | 7.22 | 8.93  | 6.98 | 7.43  | 2.72 | 6.48  |

<https://mc.manuscriptcentral.com/gut>

|    |      |       |      |      |       |      |       |      |       |
|----|------|-------|------|------|-------|------|-------|------|-------|
| 1  |      |       |      |      |       |      |       |      |       |
| 2  | 5.17 | 8.2   | 7.94 | 7.7  | 9.02  | 6.71 | 8.06  | 2.89 | 6.02  |
| 3  | 3.24 | 8.3   | 7.22 | 6.92 | 8.62  | 7.38 | 7.32  | 2.36 | 7.48  |
| 4  | 4.74 | 9.09  | 8.9  | 8.72 | 8.63  | 6.43 | 9.33  | 2.83 | 7.59  |
| 5  | 4.66 | 7.65  | 9.21 | 9.24 | 8.96  | 7.66 | 9.71  | 2.4  | 7.27  |
| 6  | 5.85 | 7.9   | 9.25 | 9.14 | 9.3   | 6.6  | 8.73  | 3.08 | 6.51  |
| 7  | 4.21 | 8.62  | 8.4  | 8.19 | 10.81 | 6.51 | 8.65  | 2.73 | 7.31  |
| 8  | 4.94 | 6.13  | 8.04 | 7.84 | 10.93 | 6.77 | 9.52  | 3.72 | 10.03 |
| 9  | 5.37 | 6.2   | 8.18 | 8.14 | 10.6  | 6.97 | 9.72  | 2.76 | 9.84  |
| 10 | 3.49 | 8.7   | 7.89 | 6.49 | 12.1  | 6.89 | 10.09 | 4.08 | 12.18 |
| 11 | 3.79 | 7.76  | 9.26 | 7.9  | 11.11 | 6.25 | 8.32  | 3.6  | 6.15  |
| 12 | 3.49 | 7.44  | 9.5  | 8.04 | 11.13 | 6.27 | 8.55  | 2.49 | 7.03  |
| 13 | 3.06 | 7.8   | 9    | 7.62 | 10.41 | 6.72 | 8.09  | 0    | 6.54  |
| 14 | 5.07 | 8.85  | 9.03 | 7.43 | 11.85 | 5.72 | 9     | 2.26 | 9.89  |
| 15 | 0    | 10.24 | 8.73 | 7.73 | 7.7   | 8.31 | 0     | 1.52 | 9.07  |
| 16 | 5.27 | 6.21  | 9.48 | 8.03 | 10.82 | 6.58 | 8.56  | 6.08 | 7.48  |
| 17 | 4.88 | 5.04  | 9.72 | 8.35 | 10.69 | 6.62 | 8.6   | 6.71 | 7.24  |
| 18 | 5.19 | 6.59  | 9.51 | 8.07 | 10.7  | 6.82 | 8.86  | 6.03 | 7.43  |
| 19 | 5.66 | 7.84  | 8.83 | 8.13 | 10.2  | 7.56 | 10    | 2.02 | 5.24  |
| 20 | 4.05 | 7.07  | 8.28 | 7.13 | 9.21  | 7.45 | 8.87  | 0.77 | 6.31  |
| 21 | 4.98 | 7.44  | 8.52 | 7.5  | 9.48  | 7.36 | 9.26  | 1.98 | 5.95  |
| 22 | 5.16 | 8.97  | 5.16 | 5.16 | 10.97 | 6.16 | 8.16  | 5.16 | 12.45 |
| 23 | 5.24 | 7.85  | 8.03 | 8.42 | 10.66 | 4.46 | 10.09 | 3.04 | 7.56  |
| 24 | 5.66 | 8.94  | 8.23 | 8.26 | 10.41 | 5.93 | 9.35  | 2.86 | 7.11  |
| 25 | 4.18 | 8.53  | 9.1  | 7.84 | 11.41 | 6.85 | 9.09  | 2.18 | 8.11  |
| 26 | 5.15 | 8.28  | 8.96 | 7.84 | 11.43 | 6.69 | 8.72  | 4.23 | 9.48  |
| 27 | 6.42 | 8.42  | 9.13 | 8.76 | 10.07 | 6.37 | 8.89  | 2.13 | 7.19  |
| 28 | 1    | 9.09  | 6.97 | 6.95 | 7.35  | 7.52 | 4.32  | 1    | 8.27  |
| 29 | 2.44 | 9.1   | 6.99 | 7.03 | 6.47  | 7.38 | 1.86  | 2.44 | 8.11  |
| 30 | 1.77 | 8.82  | 7.19 | 6.77 | 6.47  | 7.32 | 3.77  | 1.77 | 7.52  |
| 31 | 5.26 | 7.31  | 7.98 | 7.39 | 8.54  | 6.48 | 7.8   | 4.1  | 4.47  |
| 32 | 4.68 | 7.05  | 7.91 | 7.88 | 7.6   | 5.76 | 7.11  | 3.18 | 6.11  |
| 33 | 4.11 | 7.16  | 7.95 | 7.55 | 9.16  | 6.36 | 8.32  | 2.69 | 6.81  |
| 34 | 5.16 | 7.38  | 8    | 8.35 | 7.9   | 5.77 | 8.02  | 3.16 | 6.11  |
| 35 | 0.45 | 8.02  | 6.26 | 6.18 | 6.66  | 6.77 | 4.45  | 0.45 | 7.26  |
| 36 | 0.25 | 8.08  | 6.27 | 5.87 | 7.9   | 6.87 | 5.68  | 0.25 | 7.84  |
| 37 | 0    | 7.68  | 6.24 | 6.04 | 8.52  | 6.63 | 6.68  | 0    | 8.09  |
| 38 | 0    | 7.81  | 5.78 | 6    | 6.65  | 7.12 | 0     | 0    | 7.83  |
| 39 | 1.34 | 8.21  | 5.98 | 5.92 | 6.14  | 6.29 | 4.14  | 1.34 | 7.24  |
| 40 | 2.1  | 8.06  | 6.42 | 6    | 6.14  | 6.52 | 3.42  | 1.1  | 7.56  |
| 41 | 0.31 | 8.22  | 6.33 | 5.92 | 6.12  | 6.4  | 3.77  | 1.31 | 7.09  |
| 42 | 2.41 | 7     | 3.41 | 3.41 | 7.11  | 5.41 | 2.41  | 2.41 | 6.5   |
| 43 | 1.06 | 9.07  | 7.46 | 6.7  | 6.99  | 7.68 | 5.3   | 3.06 | 8.06  |
| 44 | 0    | 9.24  | 7.73 | 7.23 | 6.77  | 7.92 | 0.33  | 0    | 8.13  |
| 45 | 0.87 | 8.61  | 7.34 | 6.75 | 9.33  | 7.06 | 7.91  | 1.87 | 7.64  |
| 46 | 1.75 | 8.63  | 7.18 | 6.62 | 8.23  | 7.3  | 5.39  | 0    | 7.82  |
| 47 | 3    | 8.52  | 7.34 | 7.34 | 8.77  | 6.58 | 7.15  | 0.88 | 8.46  |
| 48 | 0.3  | 9.11  | 7.35 | 6.8  | 8.48  | 7    | 5.82  | 2.62 | 9.52  |
| 49 | 0.71 | 8.6   | 7.47 | 6.64 | 6.61  | 7.01 | 3.03  | 0.71 | 8.39  |
| 50 | 1.48 | 8.39  | 7.32 | 6.84 | 7.57  | 7.2  | 4.36  | 1.9  | 8.56  |
| 51 | 3.72 | 7.82  | 8.04 | 6.68 | 10.16 | 6.89 | 7.63  | 1.91 | 6.3   |
| 52 | 4.44 | 7.61  | 8.03 | 7.03 | 9.98  | 7.37 | 7.78  | 1.74 | 6.39  |
| 53 | 5.32 | 8.18  | 8.02 | 7.27 | 9.89  | 7.05 | 7.85  | 2.04 | 6.86  |

|    |      |       |      |      |       |      |       |      |      |
|----|------|-------|------|------|-------|------|-------|------|------|
| 1  |      |       |      |      |       |      |       |      |      |
| 2  | 4.59 | 8.41  | 8.26 | 6.97 | 9.84  | 7.64 | 8.19  | 1.27 | 6.54 |
| 3  | 5.32 | 8.09  | 8.74 | 9.16 | 10.22 | 7.52 | 7.45  | 5.22 | 6.82 |
| 4  | 5.21 | 8.46  | 8.68 | 9.18 | 10.3  | 7.7  | 8.3   | 3.97 | 7.84 |
| 5  | 5.6  | 7.8   | 8.48 | 8.82 | 10.72 | 7.87 | 7.84  | 6.36 | 6.47 |
| 6  | 4.62 | 7.81  | 8.23 | 9.12 | 10.51 | 7.86 | 7.82  | 6.3  | 6.66 |
| 7  | 4.16 | 8.58  | 8.65 | 8.84 | 9.95  | 7.34 | 9.01  | 4.22 | 7.08 |
| 8  | 3.84 | 8.8   | 8.71 | 9    | 11.54 | 7.43 | 10.86 | 4.01 | 8.21 |
| 9  | 3.56 | 8.37  | 8.8  | 9.28 | 11.43 | 6.98 | 10.95 | 2.98 | 7.7  |
| 10 | 4.91 | 9.23  | 8.9  | 8.72 | 11.2  | 6.62 | 9.98  | 3.33 | 8.62 |
| 11 | 7.09 | 7.51  | 9.22 | 8.85 | 10.87 | 8.21 | 9.47  | 7.22 | 7.79 |
| 12 | 5.84 | 7.58  | 9.14 | 8.46 | 10.16 | 8    | 8.73  | 4.87 | 8.36 |
| 13 | 5.19 | 8.13  | 9.36 | 8.63 | 10.32 | 8.21 | 8.95  | 5.81 | 8.34 |
| 14 | 5.97 | 7.84  | 9.19 | 8.42 | 10.62 | 8.2  | 9.2   | 5.56 | 8.56 |
| 15 | 4.34 | 8.01  | 8.28 | 8.51 | 9.91  | 6.62 | 8.6   | 2.06 | 6.49 |
| 16 | 5.32 | 7.36  | 8.7  | 9.2  | 10.5  | 6.42 | 9.18  | 2.68 | 7.22 |
| 17 | 5.5  | 8     | 7.97 | 8.32 | 9.2   | 6.32 | 8.17  | 2.47 | 7.82 |
| 18 | 6.1  | 8.87  | 8.99 | 8.53 | 8.84  | 6.84 | 8.44  | 2.8  | 6.83 |
| 19 | 4.75 | 8.24  | 8.57 | 7.97 | 10.44 | 7.61 | 8.92  | 3.47 | 8.69 |
| 20 | 5.1  | 7.5   | 8.92 | 8.21 | 9.22  | 7.21 | 9.09  | 3.69 | 7.92 |
| 21 | 5.06 | 7.61  | 8.55 | 8.28 | 11    | 6.72 | 8.53  | 2.74 | 8.26 |
| 22 | 6.5  | 6.36  | 8.85 | 8.83 | 11.68 | 6.98 | 8.41  | 5.88 | 6.86 |
| 23 | 6.32 | 6.53  | 8.7  | 8.54 | 12.06 | 7.23 | 8.33  | 6.53 | 7.17 |
| 24 | 4.28 | 8.4   | 8.47 | 8.3  | 9.35  | 6.43 | 8.99  | 4.28 | 8.35 |
| 25 | 4.25 | 8.32  | 8.44 | 8.45 | 9.53  | 6.36 | 9.08  | 3.25 | 7.81 |
| 26 | 5.96 | 8.88  | 8.47 | 7.74 | 11.14 | 6.61 | 10.19 | 4.74 | 9.66 |
| 27 | 3.17 | 8.28  | 7.75 | 7.17 | 9.09  | 5.41 | 6.14  | 1.36 | 3.95 |
| 28 | 4.11 | 7.84  | 7.25 | 7.86 | 9.18  | 5.25 | 7.25  | 3.79 | 7.25 |
| 29 | 4.93 | 6.45  | 7.57 | 7.44 | 10.03 | 5.67 | 6.61  | 3.57 | 4.93 |
| 30 | 4.22 | 7.42  | 6.29 | 7.71 | 7.94  | 4.48 | 6.29  | 4.22 | 5.71 |
| 31 | 1.76 | 7.99  | 6.4  | 6.46 | 6.66  | 6.01 | 1.76  | 1.76 | 7.4  |
| 32 | 0.72 | 7.79  | 6.18 | 5.76 | 8.2   | 5.58 | 4.53  | 0.72 | 8.14 |
| 33 | 0.88 | 8.1   | 6.5  | 6.17 | 6.24  | 6.82 | 0.88  | 0.88 | 7.56 |
| 34 | 0.96 | 7.64  | 6.74 | 6    | 6.93  | 6.17 | 2.96  | 0.96 | 7.46 |
| 35 | 3.17 | 7.41  | 6.61 | 6.82 | 8.54  | 6.43 | 7.85  | 4.53 | 6.05 |
| 36 | 2.47 | 7.3   | 6.57 | 6.67 | 8.17  | 6.66 | 6.12  | 2.66 | 6.97 |
| 37 | 4.16 | 7.23  | 6.64 | 6.9  | 7.54  | 6.35 | 6.59  | 3.23 | 6.54 |
| 38 | 4.72 | 7.37  | 7.11 | 6.76 | 7.24  | 5.75 | 7.34  | 2.87 | 6.42 |
| 39 | 3.68 | 10.28 | 9.2  | 8.72 | 0.35  | 5.44 | 6.54  | 3.81 | 4.6  |
| 40 | 3.78 | 8.16  | 8.63 | 8.37 | 11.4  | 7.05 | 7.92  | 3.78 | 7.65 |
| 41 | 4.51 | 9.39  | 8.77 | 7.96 | 10.42 | 6.88 | 9.35  | 2    | 8    |
| 42 | 2.23 | 10.09 | 7.59 | 6.76 | 11.15 | 5.93 | 8.59  | 4.82 | 10   |
| 43 | 4.55 | 8.61  | 8.47 | 7.93 | 9.98  | 6.82 | 7.73  | 0.91 | 6.39 |
| 44 | 4.51 | 9.68  | 6.1  | 7.1  | 10.66 | 6.83 | 8.9   | 4.51 | 9.87 |
| 45 | 5.65 | 7.97  | 8.79 | 8.37 | 10.19 | 7.4  | 8.06  | 2.19 | 7.08 |
| 46 | 5.55 | 6.9   | 8.95 | 8.06 | 9.84  | 7.9  | 7.68  | 0.94 | 5.98 |
| 47 | 3.27 | 5.21  | 8.88 | 6.35 | 11.86 | 8.27 | 7.48  | 4.27 | 5.49 |
| 48 | 2.98 | 8.04  | 8.45 | 7.09 | 11.43 | 7.48 | 7.98  | 3.31 | 6.31 |
| 49 | 3.98 | 7.03  | 8.53 | 7.19 | 11.42 | 7.85 | 8.32  | 3.6  | 5.98 |
| 50 | 3.58 | 8.27  | 8.14 | 7.14 | 10.6  | 7.58 | 7.72  | 3.06 | 6.75 |
| 51 | 3.48 | 6.74  | 7.75 | 7.81 | 9.98  | 6.75 | 7.07  | 2.57 | 5.88 |
| 52 | 3.34 | 7.17  | 7.43 | 7.82 | 9.25  | 5.85 | 6.11  | 2.53 | 6.72 |
| 53 | 3.54 | 7.69  | 7.19 | 7.43 | 8.94  | 5.51 | 6.02  | 1.83 | 6.37 |

<https://mc.manuscriptcentral.com/gut>

1  
2  
3  
4  
5  
6  
7  
8  
9  
10  
11  
12  
13  
14  
15  
16  
17  
18  
19  
20  
21  
22  
23  
24  
25  
26  
27  
28  
29  
30  
31  
32  
33  
34  
35  
36  
37  
38  
39  
40  
41  
42  
43  
44  
45  
46  
47  
48  
49  
50  
51  
52  
53  
54  
55  
56  
57  
58  
59  
60

|      |      |      |      |       |      |       |      |       |
|------|------|------|------|-------|------|-------|------|-------|
| 3.11 | 6.92 | 7.74 | 7.33 | 9.9   | 4.96 | 6.31  | 3.96 | 7.48  |
| 4.27 | 7.4  | 7.21 | 7.84 | 9.71  | 6.96 | 8.71  | 3.1  | 6.74  |
| 3.17 | 6.89 | 7.05 | 7.3  | 9.73  | 5.17 | 7.5   | 5.11 | 6.01  |
| 3.29 | 6.22 | 7.63 | 7.12 | 9.86  | 5.29 | 7.44  | 5.29 | 5.49  |
| 1.55 | 8.88 | 6.08 | 5.64 | 9.15  | 6.51 | 5.88  | 2.55 | 7.76  |
| 4.32 | 7.45 | 8    | 7.37 | 11.27 | 6.97 | 8.94  | 1.89 | 6.7   |
| 3.93 | 7.04 | 7.74 | 5.67 | 11.58 | 7.17 | 7.5   | 0.65 | 7.86  |
| 4.4  | 6.85 | 7.87 | 5.73 | 11.61 | 7.13 | 7.72  | 0.35 | 7.93  |
| 0.27 | 8.19 | 6.68 | 6.86 | 6.65  | 7.59 | 0.27  | 1.86 | 7.23  |
| 1.77 | 8.4  | 7.2  | 6.92 | 7.7   | 6.59 | 6.51  | 2.66 | 7.42  |
| 4.18 | 7.86 | 8.45 | 8.24 | 9.35  | 6.7  | 7.49  | 2.97 | 5.08  |
| 4.35 | 7.53 | 7.99 | 7.92 | 9.58  | 7.04 | 7.19  | 2.47 | 6.67  |
| 4.39 | 7.83 | 8.16 | 8.03 | 10.15 | 6.3  | 7.15  | 3.3  | 6.87  |
| 6.08 | 7.67 | 7.96 | 8    | 8.19  | 6.39 | 6.45  | 2.45 | 6.41  |
| 3.54 | 8.1  | 6.63 | 6.45 | 11.4  | 6.35 | 10.91 | 3.54 | 12.56 |
| 3.5  | 7.54 | 7.19 | 7.26 | 10.38 | 6.79 | 6.5   | 2.61 | 7.09  |
| 2.56 | 7.94 | 7.39 | 7.32 | 8.7   | 6.64 | 6.43  | 0.82 | 7.96  |
| 3.21 | 7.57 | 7.24 | 7.08 | 10.66 | 6.94 | 6.51  | 0.75 | 7.2   |

1  
2  
3  
4  
5  
6  
7  
8  
9  
10  
11  
12  
13  
14  
15  
16  
17  
18  
19  
20  
21  
22  
23  
24  
25  
26  
27  
28  
29  
30  
31  
32  
33  
34  
35  
36  
37  
38  
39  
40  
41  
42  
43  
44  
45  
46  
47  
48  
49  
50  
51  
52  
53  
54  
55  
56  
57  
58  
59  
60

| EPHB4 | EPN3 | EPS8L1 | ERBB2 | ERBB2IP | ERBB3 | EREG | ERMP1 | ESRP1 |
|-------|------|--------|-------|---------|-------|------|-------|-------|
| 7.95  | 7.77 | 6.68   | 7.65  | 9.52    | 8.97  | 0    | 6.54  | 8.75  |
| 8.2   | 7.61 | 8.48   | 8.66  | 9.58    | 9.11  | 4.92 | 7.64  | 9.78  |
| 8.21  | 7.95 | 8.98   | 8.64  | 9.43    | 8.89  | 5.92 | 7.95  | 9.72  |
| 8.88  | 7.49 | 8.91   | 9.4   | 9.85    | 9.55  | 5.99 | 8.23  | 10.18 |
| 8.67  | 9.25 | 7.03   | 8.72  | 8.62    | 8.38  | 1.01 | 5.47  | 8.52  |
| 8.1   | 7.71 | 6.82   | 8.76  | 9.35    | 8.44  | 3.19 | 8.36  | 9.1   |
| 8.03  | 7.87 | 7.21   | 8.94  | 9.51    | 8.55  | 4.83 | 8.27  | 9.17  |
| 9.01  | 8.16 | 8.25   | 10.43 | 9.8     | 9.3   | 3.39 | 8.76  | 10.12 |
| 9.2   | 7.53 | 7.31   | 9.48  | 9.57    | 9.45  | 1.95 | 9.16  | 9.97  |
| 8.7   | 7.67 | 7.87   | 8.99  | 9.15    | 9.16  | 1.49 | 8.76  | 9.74  |
| 9.14  | 6.87 | 7.53   | 9.27  | 9.63    | 9.21  | 3.19 | 9.25  | 10.17 |
| 8.61  | 6.56 | 8      | 8.87  | 9.94    | 9     | 3    | 8.93  | 9.73  |
| 8.54  | 7.35 | 7.29   | 8.64  | 9.45    | 9.91  | 7.03 | 8.65  | 10.14 |
| 8.7   | 7.44 | 6.9    | 8.52  | 9.58    | 8.94  | 6.83 | 8.1   | 10.16 |
| 9.75  | 7.5  | 8.87   | 10.22 | 9.69    | 9.99  | 1.77 | 8.23  | 12.14 |
| 8.79  | 8.16 | 7.84   | 9.19  | 9.6     | 8.99  | 3.94 | 6.75  | 9.47  |
| 8.75  | 8.46 | 9.18   | 9.77  | 9.63    | 9.22  | 5.99 | 7.57  | 10.01 |
| 9.02  | 8.52 | 8.8    | 9.83  | 9.46    | 8.8   | 3.35 | 6.69  | 10.14 |
| 8.95  | 7.62 | 7.67   | 9.87  | 10.66   | 9.76  | 1.48 | 8.34  | 10.04 |
| 9.51  | 7.28 | 7.58   | 9.29  | 10.6    | 9.64  | 2.89 | 9.04  | 10.01 |
| 9.32  | 6.52 | 6.52   | 8.99  | 10.54   | 9.44  | 3.5  | 8.43  | 9.58  |
| 9.3   | 7.97 | 9.27   | 9.46  | 10      | 9.75  | 4.96 | 9.19  | 10.64 |
| 9.46  | 8    | 9.26   | 9.61  | 9.88    | 9.83  | 5.95 | 9.13  | 10.73 |
| 8.93  | 7.44 | 8.95   | 9.46  | 10.15   | 9.52  | 4.35 | 8.93  | 10.31 |
| 9.12  | 3.01 | 6.49   | 11.28 | 9.27    | 7.97  | 2.43 | 7.44  | 10.55 |
| 8.09  | 7.86 | 9.4    | 11.95 | 9.82    | 9.71  | 2.71 | 8.48  | 10.26 |
| 8.21  | 8.03 | 9.03   | 12.32 | 9.87    | 9.74  | 3.11 | 8.27  | 10.28 |
| 8.14  | 8.32 | 8.77   | 11.9  | 9.58    | 9.32  | 2.72 | 7.82  | 9.84  |
| 8.65  | 7.96 | 9.15   | 8.82  | 9.7     | 9.83  | 2.28 | 6.95  | 9.37  |
| 8.62  | 7.89 | 8.85   | 8.46  | 9.45    | 9     | 3.77 | 7.15  | 9.27  |
| 8.78  | 7.86 | 9.09   | 8.85  | 9.77    | 9.64  | 4.52 | 7.73  | 9.56  |
| 8.86  | 8.23 | 9.17   | 9.05  | 9.45    | 9.42  | 3.03 | 7.35  | 9.31  |
| 8.09  | 8.06 | 6.09   | 7.35  | 10.08   | 6.28  | 3.99 | 7.58  | 6.62  |
| 11.12 | 7.95 | 7.55   | 9.46  | 9.29    | 10.03 | 2.64 | 7.88  | 9.87  |
| 11.45 | 8.41 | 8.62   | 9.69  | 9.12    | 10.03 | 3.7  | 7.91  | 10.31 |
| 11.37 | 8.68 | 8.08   | 9.88  | 9.32    | 10.17 | 3.06 | 7.91  | 10.17 |
| 7.85  | 3.45 | 8.62   | 7.42  | 9.44    | 7.17  | 6.65 | 7.85  | 9.52  |
| 7.77  | 4.96 | 7.7    | 7.9   | 9.24    | 7.87  | 5.74 | 8     | 9.59  |
| 7.35  | 5.07 | 6.89   | 7.26  | 9.08    | 6.56  | 4.07 | 7.57  | 8.86  |
| 7.42  | 4.33 | 6.58   | 7.39  | 9.39    | 7.22  | 4.2  | 7.6   | 8.64  |
| 8.76  | 7.38 | 7.06   | 8.74  | 8.59    | 8.43  | 1.83 | 6.83  | 8.6   |
| 8.98  | 7.57 | 7.03   | 8.92  | 8.24    | 8.51  | 1.48 | 7.15  | 8.91  |
| 8.94  | 7.28 | 6.39   | 8.75  | 7.97    | 8.23  | 0.22 | 6.95  | 8.21  |
| 9.54  | 6.89 | 7.02   | 9.27  | 8.23    | 8.88  | 0    | 7.69  | 9.09  |
| 9.29  | 8.64 | 8.47   | 9.93  | 8.38    | 11.16 | 2.86 | 7.32  | 10.85 |
| 8.2   | 8.15 | 7.31   | 8.73  | 9.38    | 9.16  | 2.31 | 7.3   | 10.29 |
| 8.39  | 7.94 | 7.58   | 8.54  | 9.28    | 9     | 2.58 | 7     | 10.07 |
| 7.97  | 7.36 | 6.71   | 8.39  | 9.44    | 8.58  | 2.39 | 7.11  | 9.58  |
| 8.72  | 6.06 | 7.7    | 11.17 | 10.18   | 10.44 | 6.92 | 9.1   | 10.84 |
| 8.94  | 5.59 | 7.7    | 10.61 | 10.14   | 9.52  | 7.59 | 8.67  | 10.87 |
| 8.51  | 5.82 | 7.15   | 10.59 | 10      | 9.9   | 5.95 | 8.86  | 11.05 |

<https://mc.manuscriptcentral.com/gut>

|    |       |       |       |       |       |       |      |      |       |
|----|-------|-------|-------|-------|-------|-------|------|------|-------|
| 1  |       |       |       |       |       |       |      |      |       |
| 2  | 8.55  | 4.54  | 7.43  | 10.54 | 10.13 | 9.21  | 6.14 | 8.25 | 10.69 |
| 3  | 9.42  | 9.17  | 7.69  | 9.12  | 9.08  | 9.78  | 7.82 | 9.47 | 10.75 |
| 4  | 9.37  | 8.77  | 7.28  | 8.97  | 9.39  | 9.69  | 7.96 | 9.81 | 10.83 |
| 5  | 9.4   | 8.81  | 7.5   | 8.97  | 9.39  | 9.47  | 7.65 | 9.97 | 10.84 |
| 6  | 9.22  | 8.73  | 7.04  | 8.99  | 9.41  | 9.5   | 8.11 | 9.83 | 10.66 |
| 7  | 11.07 | 7.79  | 7.59  | 10.05 | 10.26 | 10.05 | 3.23 | 8.2  | 10.39 |
| 8  | 10.97 | 8.51  | 8.38  | 9.28  | 10.36 | 10.18 | 2.57 | 8.97 | 11.13 |
| 9  | 10.72 | 8.69  | 7.74  | 9.35  | 10.19 | 10.44 | 2    | 8.92 | 11.55 |
| 10 | 10.74 | 8.35  | 7.99  | 9.2   | 10.29 | 10.07 | 2.02 | 8.77 | 11.41 |
| 11 | 8.48  | 6.81  | 6.44  | 8.38  | 10    | 10.22 | 2.39 | 8.05 | 10.84 |
| 12 | 8.45  | 7.35  | 8.17  | 8.91  | 9.91  | 9.75  | 5.24 | 8.21 | 10.58 |
| 13 | 8.79  | 7.03  | 7.36  | 9     | 9.6   | 9.93  | 5.52 | 7.94 | 10.84 |
| 14 | 8.45  | 6.73  | 7     | 8.98  | 9.48  | 9.69  | 5.62 | 7.86 | 10.33 |
| 15 | 10.36 | 10.47 | 9.15  | 9.24  | 7.96  | 9.47  | 5.15 | 7.47 | 9.4   |
| 16 | 9.45  | 9.06  | 9.52  | 9.49  | 9.23  | 9.47  | 2.79 | 7.48 | 10.38 |
| 17 | 8.74  | 8.2   | 8.4   | 8.83  | 9.09  | 9.15  | 0.28 | 7.59 | 9.91  |
| 18 | 10.42 | 10.64 | 8.74  | 9.94  | 9.13  | 8.93  | 1.24 | 6.75 | 9.71  |
| 19 | 10.64 | 10.81 | 8.21  | 9.87  | 8.73  | 8.9   | 2.77 | 6.33 | 9.65  |
| 20 | 9.7   | 7.93  | 8.17  | 8.83  | 10.23 | 9.38  | 2.14 | 9.36 | 10.45 |
| 21 | 9.52  | 7.88  | 8.92  | 8.99  | 10.36 | 9.6   | 3.35 | 9.65 | 10.6  |
| 22 | 9.53  | 8.02  | 8.26  | 9.18  | 10    | 9.53  | 1.67 | 9.39 | 10.42 |
| 23 | 8.69  | 7.65  | 7.91  | 9.65  | 10.1  | 10.65 | 6.7  | 8.75 | 9.99  |
| 24 | 8.55  | 7.73  | 7.79  | 9.36  | 9.87  | 10.56 | 6.16 | 8.68 | 9.7   |
| 25 | 8.34  | 7.94  | 6.48  | 8.75  | 9.95  | 9.98  | 3.37 | 8.13 | 9.35  |
| 26 | 8.9   | 8.76  | 10.82 | 9.5   | 10.62 | 9.34  | 3.22 | 9.16 | 10.73 |
| 27 | 9.01  | 8.4   | 10.97 | 9.8   | 10.3  | 9.19  | 3.63 | 9.21 | 10.65 |
| 28 | 8.88  | 8.53  | 10.98 | 9.77  | 10.2  | 8.96  | 3.86 | 9.28 | 10.77 |
| 29 | 8.81  | 7.36  | 7.15  | 8.8   | 9.83  | 9.1   | 3.17 | 8.18 | 10.13 |
| 30 | 8.98  | 7.19  | 6.92  | 8.72  | 9.92  | 9.14  | 4.98 | 8.55 | 10.16 |
| 31 | 8.92  | 7.44  | 6.99  | 8.64  | 9.97  | 9.18  | 2.96 | 7.95 | 10.1  |
| 32 | 9.21  | 8.08  | 7.21  | 9.22  | 10.01 | 9.49  | 4.37 | 8.59 | 9.98  |
| 33 | 9.58  | 8.07  | 7.3   | 9.17  | 9.82  | 9.43  | 2.52 | 8.97 | 10.36 |
| 34 | 9.64  | 8.47  | 7.65  | 9.64  | 9.97  | 9.7   | 1.99 | 8.59 | 10.4  |
| 35 | 9     | 8.04  | 9.07  | 9.17  | 9.81  | 8.79  | 2.73 | 8.19 | 9.82  |
| 36 | 8.92  | 8.17  | 9.23  | 9.26  | 9.82  | 9.18  | 4.34 | 8.37 | 10.18 |
| 37 | 8.96  | 8.01  | 9.63  | 9     | 9.73  | 8.53  | 4.17 | 8.13 | 9.78  |
| 38 | 8.52  | 8.19  | 7.67  | 9.13  | 9.63  | 8.57  | 3.24 | 6.79 | 9.07  |
| 39 | 8.52  | 8.19  | 7.67  | 9.13  | 9.63  | 8.57  | 3.24 | 6.79 | 9.07  |
| 40 | 9.06  | 8.69  | 9.1   | 10.17 | 9.57  | 9.15  | 4.4  | 6.96 | 9.93  |
| 41 | 8.6   | 8.43  | 8.76  | 9.7   | 9.65  | 8.74  | 3.76 | 6.89 | 9.47  |
| 42 | 8.71  | 8.3   | 8.81  | 9.97  | 9.97  | 8.94  | 4.21 | 7.15 | 9.48  |
| 43 | 8.43  | 7.69  | 6.95  | 7.89  | 9.27  | 8.32  | 1.56 | 6.62 | 8.47  |
| 44 | 9.16  | 7.66  | 7.77  | 8.72  | 9.75  | 9.27  | 5.72 | 7.67 | 9.41  |
| 45 | 9.07  | 7.71  | 7.52  | 8.7   | 10.05 | 9.85  | 4.27 | 8.01 | 10.01 |
| 46 | 8.87  | 7.71  | 7.78  | 8.76  | 9.34  | 9.38  | 1.61 | 7.04 | 9.13  |
| 47 | 8.93  | 8.26  | 7.41  | 12.5  | 9.58  | 9.61  | 5.31 | 8.24 | 10.41 |
| 48 | 8.88  | 8.3   | 8.1   | 12.24 | 9.27  | 10.1  | 6.16 | 8.56 | 10.58 |
| 49 | 9.13  | 8.82  | 7.94  | 12.73 | 9.44  | 9.82  | 5.16 | 8.12 | 10.38 |
| 50 | 7.88  | 7.52  | 7.43  | 8.18  | 9.32  | 8.01  | 2.74 | 6.81 | 8.54  |
| 51 | 8.14  | 7.73  | 7.5   | 8.15  | 9.32  | 8.41  | 3.34 | 6.78 | 8.44  |
| 52 | 8.24  | 7.43  | 6.87  | 8.26  | 9.31  | 8.45  | 0.46 | 7.22 | 8.51  |
| 53 | 8.48  | 7.41  | 8.85  | 8.9   | 8.6   | 8.63  | 1.98 | 7.11 | 9.22  |

|    |       |       |       |       |       |       |      |      |       |
|----|-------|-------|-------|-------|-------|-------|------|------|-------|
| 1  |       |       |       |       |       |       |      |      |       |
| 2  | 8.44  | 7.51  | 9.06  | 8.76  | 8.86  | 8.77  | 2.7  | 6.89 | 9.35  |
| 3  | 8.89  | 8.45  | 9.39  | 9.19  | 8.53  | 8.49  | 0    | 6.15 | 9.14  |
| 4  | 8.3   | 8.18  | 8.23  | 9.06  | 10.14 | 8.64  | 2.57 | 7.57 | 8.6   |
| 5  | 9     | 8.08  | 10.01 | 9.66  | 10.04 | 9.44  | 7.85 | 8.46 | 9.99  |
| 6  | 8.99  | 7.49  | 8.57  | 9.56  | 10.26 | 9.48  | 3.95 | 7.67 | 9.13  |
| 7  | 9.05  | 6.62  | 8.55  | 7.95  | 9.78  | 8.93  | 5.36 | 8.19 | 9.86  |
| 8  | 9.75  | 7.68  | 8.76  | 8.79  | 9.76  | 8.77  | 4.91 | 9.13 | 10.52 |
| 9  | 9.85  | 7.27  | 8.4   | 8.6   | 9.91  | 8.71  | 4.56 | 9.11 | 10.21 |
| 10 | 10.99 | 10.06 | 10.15 | 10.63 | 9     | 9.24  | 4.49 | 8.4  | 11.07 |
| 11 | 9.95  | 6.35  | 8.51  | 10.02 | 9.37  | 10.06 | 2.38 | 7.73 | 10.15 |
| 12 | 9.8   | 7.19  | 8.58  | 9.62  | 9.17  | 9.96  | 0.49 | 7.79 | 10.46 |
| 13 | 9.19  | 7.61  | 8.19  | 8.65  | 8.49  | 8.97  | 1.89 | 7.29 | 9.65  |
| 14 | 10.56 | 9.13  | 10.36 | 10.9  | 9.14  | 10.12 | 2.26 | 7.69 | 10.93 |
| 15 | 9.46  | 9.69  | 6.92  | 9.11  | 7.94  | 8.96  | 0    | 4.45 | 10.05 |
| 16 | 8.53  | 6.99  | 7.47  | 8.47  | 9.21  | 8.53  | 3.95 | 8.78 | 10.55 |
| 17 | 8.64  | 6.21  | 7.6   | 8.35  | 9.26  | 8.74  | 2.83 | 9    | 10.75 |
| 18 | 8.58  | 6.69  | 7.63  | 8.58  | 9.24  | 8.72  | 3.69 | 8.93 | 10.55 |
| 19 | 8.48  | 6.72  | 10.45 | 8.92  | 10.24 | 8.32  | 2.02 | 8.32 | 9.32  |
| 20 | 8.62  | 7.75  | 9.78  | 8.64  | 9.59  | 7.8   | 0    | 7.75 | 8.8   |
| 21 | 8.63  | 7.68  | 10.12 | 8.66  | 9.92  | 7.74  | 2.98 | 7.93 | 8.94  |
| 22 | 10.84 | 10.81 | 12.19 | 10.33 | 7.97  | 10.12 | 5.16 | 6.16 | 9.92  |
| 23 | 10.88 | 5.51  | 9.85  | 8.44  | 9.32  | 9.04  | 4.13 | 7.71 | 9.43  |
| 24 | 10.32 | 6.78  | 9.37  | 8.63  | 9.78  | 8.92  | 1.54 | 7.48 | 9.24  |
| 25 | 9.75  | 7.99  | 9.77  | 10.52 | 9.12  | 10.24 | 2.77 | 8.16 | 9.9   |
| 26 | 10.11 | 8.43  | 9.7   | 10.77 | 9.11  | 10.36 | 2.49 | 8.21 | 9.64  |
| 27 | 9.21  | 6.13  | 8.58  | 9.58  | 9.56  | 9.28  | 3.35 | 7.61 | 8.93  |
| 28 | 9.72  | 8.85  | 7.7   | 8.23  | 8.32  | 8.62  | 3    | 4.9  | 8.46  |
| 29 | 9.61  | 9.07  | 7.11  | 8.42  | 7.88  | 8.49  | 2.86 | 4.95 | 8.4   |
| 30 | 8.35  | 8.44  | 6.41  | 7.92  | 8.03  | 8.03  | 1.77 | 4.77 | 8.29  |
| 31 | 7.23  | 6.67  | 6.38  | 8.37  | 9.27  | 7.8   | 1.01 | 7.81 | 7.38  |
| 32 | 7.44  | 6.23  | 5.15  | 8.02  | 9.05  | 7.17  | 3.4  | 7.4  | 6.55  |
| 33 | 7.75  | 7.77  | 7.22  | 8.58  | 9.04  | 7.84  | 1.69 | 7.58 | 7.92  |
| 34 | 7.42  | 5.68  | 4.91  | 7.69  | 9.23  | 6.6   | 3.74 | 7.31 | 6.33  |
| 35 | 8.04  | 8.43  | 7.07  | 7.89  | 7.33  | 7.89  | 0.45 | 4.54 | 7.73  |
| 36 | 7.69  | 7.56  | 7.15  | 8.03  | 7.91  | 8.08  | 0.25 | 4.71 | 8.17  |
| 37 | 7.81  | 7.79  | 6.87  | 8.27  | 7.84  | 7.98  | 0    | 6.2  | 8.37  |
| 38 | 8.96  | 8.99  | 6.66  | 8.22  | 7.82  | 8.02  | 0    | 5.08 | 8.31  |
| 39 | 7.89  | 7.94  | 6.42  | 7.4   | 7.58  | 7.54  | 1.34 | 4.14 | 7.14  |
| 40 | 7.59  | 8.02  | 6.42  | 7.45  | 7.44  | 7.6   | 1.1  | 3.42 | 7.59  |
| 41 | 7.81  | 7.92  | 6.24  | 7.59  | 7.46  | 7.54  | 0.31 | 5.06 | 7.57  |
| 42 | 10    | 9.82  | 6.66  | 7.73  | 6.73  | 7.62  | 2.41 | 6.22 | 7.58  |
| 43 | 8.63  | 8.84  | 7.43  | 8.45  | 8.59  | 8.4   | 3.06 | 6.01 | 8.56  |
| 44 | 8.82  | 9.16  | 8.38  | 8.75  | 8.57  | 8.89  | 0.33 | 5.46 | 8.75  |
| 45 | 8.59  | 8.62  | 10.03 | 8.86  | 9.03  | 8.83  | 0.87 | 7.75 | 9.9   |
| 46 | 8.56  | 8.67  | 8.5   | 8.53  | 8.51  | 8.55  | 0    | 6.27 | 8.92  |
| 47 | 7.93  | 8.07  | 7.5   | 9.76  | 8.51  | 8.46  | 1.88 | 6.61 | 8.86  |
| 48 | 7.95  | 8.75  | 7.57  | 10.17 | 7.95  | 8.49  | 1.3  | 5.82 | 8.9   |
| 49 | 7.45  | 8.52  | 6.97  | 9.4   | 8.31  | 8.4   | 1.71 | 5.35 | 8.43  |
| 50 | 8.67  | 9.27  | 7.29  | 9.54  | 8.39  | 8.53  | 0    | 5.39 | 8.65  |
| 51 | 8.27  | 6.39  | 6.35  | 7.76  | 8.89  | 9.39  | 0    | 8.29 | 10.82 |
| 52 | 8.5   | 6.3   | 6.28  | 8.06  | 9.09  | 8.96  | 1.33 | 8.75 | 10.55 |
| 53 | 8.5   | 7.19  | 6.69  | 8     | 8.93  | 8.8   | 3.04 | 8.58 | 10.34 |

<https://mc.manuscriptcentral.com/gut>



|    |       |      |       |       |       |       |      |      |       |
|----|-------|------|-------|-------|-------|-------|------|------|-------|
| 1  |       |      |       |       |       |       |      |      |       |
| 2  | 8.38  | 7.29 | 6.22  | 7.74  | 9.22  | 8.66  | 2.59 | 8.69 | 10.25 |
| 3  | 8.63  | 8.69 | 7.69  | 10.77 | 10.12 | 10.27 | 3.1  | 9.22 | 10.12 |
| 4  | 8.8   | 8.85 | 8.19  | 10.64 | 10.08 | 10.06 | 4.94 | 9.02 | 10.34 |
| 5  | 8.94  | 9.31 | 7.1   | 10.98 | 9.54  | 10.47 | 3.74 | 9.18 | 10.34 |
| 6  | 8.98  | 9.09 | 6.89  | 11.13 | 9.51  | 10.54 | 2.65 | 9.29 | 10.39 |
| 7  | 9.15  | 8.71 | 7.76  | 12.17 | 10.25 | 9.8   | 2.35 | 8.41 | 9.76  |
| 8  | 9.89  | 9.69 | 8.62  | 13.81 | 9.96  | 10.4  | 3.43 | 9.03 | 11.17 |
| 9  | 9.23  | 8.91 | 8.3   | 11.88 | 10.07 | 10.23 | 3.15 | 8.8  | 10.53 |
| 10 | 9.51  | 9.06 | 7.28  | 12.09 | 9.87  | 9.78  | 1.74 | 8.52 | 10.24 |
| 11 | 10.73 | 8.76 | 9.51  | 15.39 | 8.89  | 10.33 | 2.76 | 8.41 | 10.64 |
| 12 | 11.02 | 8.05 | 8.71  | 14.76 | 9.17  | 9.37  | 3.75 | 8.75 | 9.6   |
| 13 | 11.17 | 7.74 | 8.81  | 14.76 | 9.18  | 9.58  | 4.47 | 8.64 | 9.59  |
| 14 | 11.24 | 8.17 | 9.11  | 15.07 | 8.83  | 9.7   | 0.06 | 8.97 | 10.07 |
| 15 | 8.62  | 7.58 | 8.35  | 10.46 | 9.45  | 9.63  | 2.06 | 8.09 | 9.96  |
| 16 | 9.08  | 8.2  | 9.09  | 10.67 | 9.69  | 10.72 | 3.32 | 8.96 | 10.38 |
| 17 | 9     | 8.08 | 8.38  | 10.41 | 9.25  | 9.49  | 2.15 | 7.51 | 9.42  |
| 18 | 8.4   | 6.4  | 6.32  | 8.08  | 10.22 | 8.08  | 2.8  | 8.44 | 8.19  |
| 19 | 9.34  | 7.9  | 8.24  | 9.38  | 9.66  | 9.32  | 3.47 | 9.04 | 9.95  |
| 20 | 8.89  | 6.61 | 8.01  | 9.04  | 10.02 | 8.33  | 3.69 | 8.6  | 9.02  |
| 21 | 8.84  | 7.44 | 6.1   | 9.09  | 9.65  | 10.06 | 2.93 | 9.01 | 10.58 |
| 22 | 8.77  | 6.67 | 6.59  | 9.12  | 9.8   | 8.84  | 8.24 | 8.17 | 9.98  |
| 23 | 9.04  | 6.77 | 6.29  | 9.8   | 9.86  | 9.46  | 8.23 | 8.5  | 10.01 |
| 24 | 8.69  | 7.71 | 9.44  | 8.8   | 9.94  | 8.44  | 2.69 | 8.14 | 8.9   |
| 25 | 8.44  | 7.29 | 9.76  | 9.02  | 10.16 | 8.85  | 2.51 | 8.39 | 8.87  |
| 26 | 9.66  | 9.1  | 12.24 | 10.9  | 10.19 | 8.79  | 4.15 | 8.32 | 9.93  |
| 27 | 7.33  | 5.12 | 3.53  | 7.27  | 9.14  | 8.08  | 1.95 | 6.98 | 8.26  |
| 28 | 7.28  | 7.33 | 5.49  | 7.62  | 8.88  | 8.12  | 2.79 | 7.55 | 8.36  |
| 29 | 7.58  | 6.83 | 4.85  | 8.12  | 8.63  | 8.87  | 1.76 | 7.63 | 8.99  |
| 30 | 7.6   | 5.6  | 4.71  | 7.76  | 9.38  | 8.61  | 3.48 | 5.81 | 8.59  |
| 31 | 7.25  | 8.31 | 6.51  | 7.46  | 7.25  | 7.59  | 1.76 | 3.76 | 7.08  |
| 32 | 7.2   | 7.76 | 7.3   | 7.5   | 7.27  | 7.66  | 0.72 | 4.18 | 8.07  |
| 33 | 7.31  | 7.87 | 7.07  | 7.31  | 7.53  | 7.8   | 0.88 | 4.05 | 7.31  |
| 34 | 7.31  | 7.79 | 6.91  | 7.37  | 7.2   | 7.72  | 1.96 | 3.96 | 7.61  |
| 35 | 7.77  | 7.32 | 6.38  | 7.87  | 8.4   | 8.48  | 0.94 | 6.65 | 7.62  |
| 36 | 7.5   | 8    | 6     | 7.79  | 8.45  | 8.48  | 1.25 | 6.17 | 7.61  |
| 37 | 7.37  | 7.44 | 5.83  | 7.54  | 8.37  | 8.35  | 1.77 | 5.62 | 6.97  |
| 38 | 7.12  | 6.97 | 5.99  | 7.55  | 8.51  | 8.02  | 1.49 | 5.59 | 6.83  |
| 39 | 6.58  | 3.52 | 2.94  | 5.21  | 10.57 | 2.68  | 3.81 | 7.72 | 1.94  |
| 40 | 9.11  | 8.13 | 6.95  | 9.51  | 9.26  | 9.56  | 7.53 | 8.62 | 10.74 |
| 41 | 8.61  | 7.64 | 10.4  | 11.8  | 10.18 | 9.04  | 1.42 | 9.65 | 10.4  |
| 42 | 10.05 | 9.74 | 9.76  | 10.33 | 9.71  | 9.87  | 2.23 | 9.01 | 11.17 |
| 43 | 9.54  | 8.43 | 7.76  | 9.06  | 9.8   | 13.92 | 2.18 | 8.53 | 10.37 |
| 44 | 9.37  | 9.37 | 10.34 | 10.34 | 9.46  | 8.97  | 4.51 | 7.51 | 10.13 |
| 45 | 10.05 | 7.59 | 7.64  | 8.8   | 9.59  | 12.37 | 3.04 | 8.52 | 10.27 |
| 46 | 10.26 | 7.73 | 7.37  | 8.99  | 9.66  | 12.58 | 1.94 | 8.35 | 10.17 |
| 47 | 9.64  | 7.4  | 7.45  | 11.08 | 9.31  | 11.14 | 6.24 | 8.56 | 10.51 |
| 48 | 9.3   | 8.33 | 7.02  | 10.45 | 9.22  | 10.05 | 5.6  | 8    | 9.95  |
| 49 | 9.37  | 7.49 | 6.9   | 10.24 | 9.2   | 9.93  | 5.98 | 8.4  | 10.09 |
| 50 | 9.08  | 8.28 | 7.1   | 9.59  | 9.27  | 9.23  | 5.26 | 7.7  | 9.6   |
| 51 | 8.53  | 6.26 | 6.58  | 8.12  | 9.16  | 7.12  | 4.33 | 7.13 | 9.83  |
| 52 | 8.21  | 7.08 | 5.89  | 7.8   | 8.85  | 8     | 2.85 | 7.2  | 9.12  |
| 53 | 7.93  | 6.88 | 6.1   | 7.72  | 8.73  | 7.6   | 2.16 | 6.73 | 8.86  |

|       |       |       |       |      |       |      |       |       |
|-------|-------|-------|-------|------|-------|------|-------|-------|
| 8.84  | 6.08  | 6.31  | 8.82  | 8.92 | 8.54  | 1.79 | 7.13  | 10.04 |
| 8.53  | 6.93  | 7.17  | 8.21  | 8.34 | 8.69  | 2.1  | 8.85  | 9.47  |
| 7.87  | 6.54  | 5.49  | 7.76  | 8.35 | 7.72  | 6.08 | 6.69  | 9.07  |
| 8.03  | 5.91  | 6.13  | 8.03  | 8.37 | 7.55  | 6.13 | 7.46  | 9.05  |
| 7.96  | 8.7   | 6.76  | 8.27  | 7.46 | 7.76  | 1.55 | 5.25  | 8.47  |
| 8.94  | 5.83  | 5.29  | 8.1   | 9.14 | 8.14  | 3.47 | 8.78  | 9.02  |
| 9.3   | 5.02  | 2.39  | 8.24  | 8.91 | 8.31  | 0.07 | 12.42 | 9.07  |
| 9.42  | 5.28  | 2.94  | 8.27  | 8.82 | 8.33  | 1.67 | 12.5  | 9.13  |
| 8.52  | 8.42  | 6.66  | 7.73  | 7.71 | 7.92  | 0.27 | 7.25  | 8.11  |
| 7.7   | 7.8   | 7.06  | 7.88  | 8.94 | 8.12  | 2.28 | 6.64  | 8.66  |
| 7.74  | 7.14  | 6.14  | 8.82  | 9.71 | 8.22  | 1.24 | 7.1   | 9.05  |
| 8.23  | 7.81  | 6.44  | 8.36  | 9.37 | 8.07  | 2.89 | 7     | 8.89  |
| 8.22  | 7.38  | 6.64  | 8.84  | 9.5  | 8.79  | 2.62 | 7.44  | 9.29  |
| 7.94  | 7.54  | 5.52  | 8.03  | 9.4  | 7.61  | 1.13 | 7.21  | 8.42  |
| 10.41 | 10.61 | 10.09 | 11.65 | 7.24 | 10.56 | 3.54 | 9.24  | 11.67 |
| 8.96  | 6.91  | 6.31  | 8.42  | 9.21 | 9.05  | 0.8  | 7.01  | 10.17 |
| 8.52  | 7.45  | 6.1   | 7.51  | 8.61 | 8.78  | 1.82 | 7.02  | 9.36  |
| 9.15  | 6.91  | 6.53  | 8.74  | 9.05 | 9.33  | 0    | 6.96  | 10.4  |

1  
2  
3  
4  
5  
6  
7  
8  
9  
10  
11  
12  
13  
14  
15  
16  
17  
18  
19  
20  
21  
22  
23  
24  
25  
26  
27  
28  
29  
30  
31  
32  
33  
34  
35  
36  
37  
38  
39  
40  
41  
42  
43  
44  
45  
46  
47  
48  
49  
50  
51  
52  
53  
54  
55  
56  
57  
58  
59  
60

| ETV4 | EVI2A | EVPL  | F11R  | F3    | FAM174B | FAP  | FASLG | FBLN1 |
|------|-------|-------|-------|-------|---------|------|-------|-------|
| 6.55 | 6.56  | 7.47  | 8.58  | 8.1   | 6.48    | 6.86 | 5.37  | 8.48  |
| 6.54 | 5.77  | 8.72  | 9.69  | 10.08 | 6.42    | 6.41 | 5.01  | 8.8   |
| 6.51 | 5.86  | 9.93  | 9.58  | 9.68  | 5.99    | 6.29 | 5.37  | 8.93  |
| 6.16 | 5.85  | 10.17 | 9.84  | 9.48  | 5.93    | 7.55 | 3.18  | 11.23 |
| 8.21 | 6.74  | 8.59  | 7.92  | 7.33  | 7.96    | 7.5  | 6.82  | 8.37  |
| 6.75 | 6.19  | 7.19  | 8.97  | 9.16  | 6.41    | 7.61 | 5.54  | 9.2   |
| 6.46 | 6.53  | 6.88  | 9.13  | 9.82  | 6.38    | 7.45 | 5.5   | 8.6   |
| 6.33 | 6.15  | 7.43  | 9.67  | 9.68  | 5.64    | 7.8  | 4.64  | 9.68  |
| 6.97 | 6.76  | 6.94  | 8.6   | 6.45  | 5.86    | 8.19 | 4.54  | 8.74  |
| 8    | 5.37  | 7.51  | 9.42  | 8.21  | 6.45    | 7.62 | 4.49  | 9.07  |
| 7.96 | 6.16  | 7.33  | 9.77  | 9.2   | 5.74    | 7.38 | 3.7   | 9.45  |
| 7.88 | 5.73  | 6.97  | 9.82  | 9.02  | 4.85    | 8.3  | 3.68  | 10.77 |
| 8.7  | 5.49  | 9.37  | 9.5   | 8.4   | 6.03    | 7.28 | 5.37  | 9.52  |
| 8.22 | 6.69  | 8.89  | 9.27  | 8.23  | 6.32    | 8.24 | 5.74  | 10.21 |
| 8.83 | 6.16  | 8.44  | 9.01  | 6.23  | 5.86    | 7.19 | 5.47  | 12.06 |
| 7.53 | 6.37  | 8.26  | 9.24  | 7.79  | 7.09    | 8.18 | 5.7   | 9.4   |
| 7.15 | 6.04  | 9.63  | 9.63  | 8.62  | 7.48    | 7.95 | 5.54  | 10.39 |
| 7.33 | 6.32  | 9.13  | 8.98  | 7.32  | 7.6     | 8.21 | 5.41  | 10.39 |
| 3.6  | 6.93  | 9.08  | 8.7   | 6.72  | 4.94    | 7.53 | 6.67  | 9.59  |
| 5.19 | 6.44  | 8.06  | 9.08  | 8.88  | 5.12    | 7.82 | 5.72  | 9.8   |
| 5.77 | 7.01  | 7.88  | 8.39  | 7     | 4.67    | 7.74 | 6.53  | 10.51 |
| 7.42 | 5.58  | 8.75  | 10.12 | 11.12 | 6.75    | 7.23 | 3.15  | 11.38 |
| 7.26 | 5.95  | 9     | 10.5  | 10.79 | 7.09    | 5.37 | 3.01  | 11.52 |
| 6.7  | 6.18  | 8.55  | 9.91  | 10.73 | 6.71    | 7.15 | 3.06  | 11.66 |
| 2.01 | 5.28  | 4.01  | 9.54  | 6.62  | 5.51    | 5.78 | 4.01  | 10.71 |
| 4.22 | 4.99  | 7.91  | 10.12 | 9.92  | 4.99    | 4.22 | 1.13  | 7.61  |
| 5.47 | 5.47  | 8.02  | 10.19 | 9.43  | 5.04    | 4.61 | 1.52  | 7.92  |
| 6.2  | 5.92  | 7.99  | 9.73  | 9.48  | 6.81    | 5.27 | 4.67  | 8.99  |
| 6.67 | 5.31  | 8.49  | 9.65  | 7.2   | 6.12    | 5.98 | 5.25  | 7.38  |
| 7.1  | 6.15  | 8.42  | 9.36  | 7.86  | 6.23    | 6.83 | 5.53  | 9.46  |
| 7.3  | 5.66  | 8.12  | 9.78  | 7.76  | 6.83    | 6.48 | 5.37  | 7.82  |
| 7.48 | 5.23  | 8.84  | 9.34  | 8.24  | 7.34    | 7.1  | 6.07  | 8.8   |
| 6.92 | 7.74  | 7.19  | 7.68  | 6.81  | 6.88    | 5.35 | 5.87  | 8.15  |
| 7.16 | 6.25  | 7.21  | 10.11 | 8.18  | 5.94    | 8.98 | 1.64  | 10.09 |
| 7.49 | 6.15  | 6.96  | 10.53 | 10.32 | 5.97    | 7.65 | 1.93  | 8.9   |
| 6.77 | 5.93  | 7.01  | 9.98  | 8.44  | 6.28    | 8.42 | 4.17  | 10.77 |
| 4.62 | 7.33  | 7.06  | 8.02  | 6.06  | 4.03    | 5.8  | 6     | 6.97  |
| 3.65 | 6.74  | 7.49  | 8.37  | 8.31  | 3.8     | 7.49 | 6.26  | 8.85  |
| 4.76 | 7.15  | 6.87  | 7.83  | 7.13  | 4.37    | 7.51 | 6.74  | 9.87  |
| 2.91 | 7.28  | 6.83  | 7.89  | 6.85  | 4.07    | 6.74 | 7.03  | 9.79  |
| 6.94 | 6.05  | 7.17  | 8.04  | 8.7   | 6.11    | 7.08 | 5.32  | 8.07  |
| 7.19 | 5.68  | 7.76  | 8.28  | 9.17  | 6.37    | 7.31 | 5.15  | 8.59  |
| 6.77 | 5.64  | 7.28  | 7.95  | 8.42  | 6.12    | 7.06 | 5.39  | 8.48  |
| 7.35 | 5.4   | 7.38  | 8.73  | 9.55  | 5.1     | 7.14 | 4.14  | 8.78  |
| 9.22 | 4.86  | 8.69  | 9.61  | 6.67  | 4.45    | 5.86 | 4.45  | 10.48 |
| 8.22 | 5.71  | 7.76  | 9.84  | 9.25  | 6.2     | 5.67 | 2.64  | 9.95  |
| 8.11 | 5.55  | 7.69  | 9.67  | 9.41  | 5.52    | 6.94 | 3     | 11    |
| 7.74 | 6     | 7.7   | 9.04  | 8.85  | 5.13    | 8.3  | 1.81  | 11.65 |
| 9.05 | 6.82  | 9.97  | 9.38  | 8.04  | 4.88    | 8.17 | 5.99  | 10.32 |
| 8.38 | 6.74  | 8.68  | 9.37  | 8.56  | 4.53    | 8.76 | 4.47  | 9.84  |
| 8.08 | 6.54  | 8.53  | 9.38  | 8.84  | 4.2     | 7.24 | 4.82  | 9.72  |

## Gut

1  
2  
3  
4  
5  
6  
7  
8  
9  
10  
11  
12  
13  
14  
15  
16  
17  
18  
19  
20  
21  
22  
23  
24  
25  
26  
27  
28  
29  
30  
31  
32  
33  
34  
35  
36  
37  
38  
39  
40  
41  
42  
43  
44  
45  
46  
47  
48  
49  
50  
51  
52  
53  
54  
55  
56  
57  
58  
59  
60

|      |      |       |       |       |      |      |      |       |
|------|------|-------|-------|-------|------|------|------|-------|
| 8.04 | 7.09 | 8.27  | 9.37  | 8.53  | 4.08 | 8.74 | 5.4  | 10.49 |
| 8.5  | 5.67 | 10.92 | 9.75  | 7.51  | 7.22 | 6.44 | 4.94 | 8.65  |
| 8.19 | 4.94 | 10.44 | 9.38  | 8.96  | 7.52 | 7.2  | 5.19 | 8.97  |
| 8.3  | 5.04 | 10.05 | 9.8   | 9.25  | 7.02 | 6.86 | 4.76 | 9.06  |
| 8.07 | 5.83 | 10.38 | 9.36  | 8.15  | 7.39 | 7.41 | 5.18 | 9.23  |
| 7    | 7.16 | 7.98  | 9.88  | 7.93  | 6.66 | 6.71 | 4.4  | 8.62  |
| 7.88 | 5.53 | 8.49  | 9.9   | 9.72  | 6.05 | 6.44 | 3.71 | 9.38  |
| 8.46 | 4.49 | 8.81  | 10.2  | 8.13  | 6.52 | 6    | 2.32 | 8.1   |
| 8.23 | 5.83 | 8.84  | 9.54  | 8.64  | 5.48 | 6.78 | 2.76 | 9.77  |
| 6.92 | 6.18 | 7.52  | 9.56  | 6.78  | 5.42 | 6.57 | 3.67 | 9.28  |
| 7.39 | 6.45 | 7.46  | 10.11 | 9.94  | 5.97 | 6.5  | 3.54 | 8.94  |
| 7.96 | 5.88 | 7.72  | 10.17 | 9.51  | 4.72 | 6.46 | 3.14 | 8.85  |
| 7.35 | 5.93 | 7.4   | 9.89  | 8.83  | 5.02 | 7.11 | 4.15 | 9.69  |
| 9.06 | 6.74 | 8.96  | 7.96  | 6.74  | 7.47 | 7.15 | 6.15 | 10.93 |
| 8.66 | 6.15 | 8.69  | 8.47  | 7.2   | 7.45 | 6.31 | 6.83 | 9.5   |
| 7.82 | 6.56 | 8.24  | 8.24  | 7.98  | 7.53 | 7.43 | 6.93 | 8.73  |
| 9.39 | 6.65 | 9.12  | 8.49  | 7.97  | 8.97 | 7.2  | 7.87 | 10.16 |
| 9.51 | 6.23 | 9.24  | 8.55  | 7.61  | 9.01 | 7    | 7.5  | 9.84  |
| 9.04 | 5.43 | 8.79  | 8.62  | 9.29  | 6.05 | 5.92 | 4.72 | 6.69  |
| 9.14 | 5.19 | 9.01  | 9.1   | 9.27  | 5.97 | 5.78 | 5.14 | 6.72  |
| 9.02 | 5.88 | 9.09  | 8.75  | 8.92  | 6.53 | 6.67 | 5.76 | 8.25  |
| 8.51 | 6.23 | 8.94  | 10.61 | 10.36 | 5.49 | 7.83 | 3.1  | 11.35 |
| 8.44 | 6.14 | 8.26  | 10.42 | 10.22 | 5.6  | 7.51 | 3.45 | 11.21 |
| 7.92 | 6.6  | 7.56  | 10.22 | 10.03 | 6.41 | 7.99 | 5.96 | 10.87 |
| 6.54 | 7.39 | 9.62  | 10.52 | 9.59  | 6.42 | 7.67 | 4.54 | 10.14 |
| 7.17 | 6.6  | 9.97  | 10.57 | 9.63  | 5.8  | 8.75 | 3.5  | 10.41 |
| 7.03 | 6.82 | 10.36 | 10.5  | 9.02  | 6.42 | 8.88 | 5.21 | 11.37 |
| 7.71 | 6.27 | 8.18  | 9.07  | 8.88  | 6.38 | 7.7  | 5.22 | 9.44  |
| 7.79 | 6.21 | 8.23  | 9.03  | 7.83  | 6.19 | 7.96 | 5.02 | 9.75  |
| 7.9  | 6.28 | 8.25  | 8.87  | 7.54  | 6.72 | 7.64 | 5.44 | 9.87  |
| 7.98 | 5.87 | 8.84  | 9.74  | 8.11  | 7    | 7.59 | 6.7  | 10.19 |
| 8.11 | 5.66 | 9.25  | 9.8   | 8.94  | 6.99 | 6.97 | 6.29 | 8.95  |
| 8.33 | 6.12 | 9.49  | 9.76  | 8.87  | 7.3  | 7.08 | 6.45 | 8.57  |
| 7.13 | 6.02 | 8.97  | 9.25  | 8.91  | 7.07 | 8.52 | 5.8  | 10.17 |
| 7.24 | 6.29 | 8.84  | 9.28  | 9.32  | 7.01 | 8.33 | 5.81 | 9.68  |
| 6.96 | 6.36 | 8.91  | 9.09  | 8.84  | 7.36 | 8.69 | 5.88 | 10.95 |
| 7.12 | 6.9  | 8.24  | 9.34  | 9.06  | 7.26 | 8.37 | 6.19 | 9.92  |
| 7.12 | 6.9  | 8.24  | 9.34  | 9.06  | 7.26 | 8.37 | 6.19 | 9.92  |
| 7.82 | 6.28 | 8.68  | 10.28 | 8.75  | 7.03 | 7.06 | 6.03 | 10.11 |
| 7.59 | 6.35 | 8.61  | 9.88  | 9.26  | 7.05 | 8.06 | 5.96 | 10.68 |
| 7.43 | 6.41 | 8.52  | 9.92  | 9.2   | 6.93 | 8.96 | 5.77 | 10.96 |
| 6.74 | 7.11 | 7.93  | 7.98  | 7.73  | 6.98 | 7.44 | 6.26 | 10.12 |
| 7.22 | 6.2  | 8.49  | 9.33  | 9.4   | 7.2  | 7.78 | 5.55 | 11.64 |
| 7.19 | 6.32 | 8.39  | 9.81  | 9.24  | 6.61 | 7.22 | 5.23 | 11.15 |
| 7.24 | 6.57 | 8.35  | 8.76  | 8.05  | 7.1  | 7.69 | 6.26 | 11.27 |
| 6.91 | 5.75 | 8.53  | 10.35 | 9.89  | 4.31 | 7.6  | 3.63 | 9.84  |
| 7.54 | 4.16 | 8.75  | 10.46 | 10.66 | 5.21 | 6.05 | 2.4  | 8.65  |
| 6.87 | 6.56 | 8.89  | 10.15 | 9.14  | 4.42 | 7.51 | 4.32 | 9.9   |
| 6.68 | 6.83 | 7.9   | 7.83  | 8.32  | 7.17 | 7.31 | 6.13 | 8.94  |
| 6.72 | 6.51 | 8.21  | 8.12  | 8.95  | 6.9  | 8.52 | 6.1  | 11.1  |
| 6.87 | 6.07 | 8.5   | 8.19  | 8.88  | 7.1  | 8.12 | 5.92 | 10.43 |
| 6.72 | 6.28 | 7.53  | 9.18  | 8.56  | 6.79 | 7.64 | 6.07 | 8.76  |

<https://mc.manuscriptcentral.com/gut>

|    |      |      |       |       |       |      |      |      |       |
|----|------|------|-------|-------|-------|------|------|------|-------|
| 1  |      |      |       |       |       |      |      |      |       |
| 2  | 6.76 | 6.1  | 7.62  | 9.39  | 8.73  | 6.66 | 7.64 | 6.1  | 8.72  |
| 3  | 7.83 | 6.59 | 8.05  | 8.58  | 7.79  | 7.58 | 7.65 | 6.96 | 9.67  |
| 4  | 7.35 | 7.15 | 7.61  | 8.98  | 8.83  | 6.7  | 6    | 4.15 | 9.34  |
| 5  | 6.82 | 6.29 | 10.85 | 9.62  | 10.42 | 8.94 | 8.49 | 3.66 | 10.95 |
| 6  | 6.9  | 6.81 | 7.86  | 8.77  | 9.68  | 9    | 8.94 | 3.08 | 12.12 |
| 7  | 6.62 | 6.98 | 8.93  | 9.07  | 7.77  | 4.31 | 7.87 | 5.36 | 9.99  |
| 8  | 8.27 | 5.57 | 7.22  | 9.72  | 10.44 | 6.85 | 7.97 | 3.01 | 8.66  |
| 9  | 8.05 | 6.02 | 7.39  | 9.77  | 9.78  | 6.31 | 8.48 | 2.34 | 9.53  |
| 10 | 9.72 | 5.95 | 8.95  | 9.59  | 9.15  | 6.82 | 7.2  | 4.08 | 10.79 |
| 11 | 6.18 | 5.75 | 9.18  | 9.3   | 7.98  | 5.18 | 6.63 | 5.04 | 8.55  |
| 12 | 5.49 | 5.49 | 8.73  | 9.94  | 9.48  | 4.74 | 6.51 | 4.49 | 8.44  |
| 13 | 6.43 | 5.54 | 8.32  | 9.21  | 9.2   | 6.37 | 6.72 | 4.7  | 7.65  |
| 14 | 7.39 | 5.72 | 10.3  | 9.41  | 7.39  | 5.58 | 7.17 | 5.43 | 11.03 |
| 15 | 8.7  | 6.65 | 9.25  | 8.63  | 7.96  | 8.71 | 8.03 | 7.77 | 8.22  |
| 16 | 7.02 | 4.53 | 9.3   | 10.02 | 8.2   | 4.9  | 7.75 | 3.41 | 7.95  |
| 17 | 6.95 | 3.29 | 9.31  | 10    | 8.86  | 3.92 | 6.83 | 2.16 | 7.39  |
| 18 | 6.83 | 4.33 | 9.32  | 10    | 8.35  | 4.22 | 7.16 | 3.61 | 8.19  |
| 19 | 5.34 | 6.8  | 8.96  | 8.88  | 9.44  | 4.39 | 7.91 | 6.51 | 8.6   |
| 20 | 6.81 | 5.98 | 8.78  | 7.97  | 8.31  | 6.05 | 8.08 | 6.2  | 8.66  |
| 21 | 6.45 | 6.38 | 8.94  | 8.47  | 8.66  | 5.37 | 8.2  | 6.11 | 8.98  |
| 22 | 6.75 | 5.16 | 10.52 | 5.16  | 6.75  | 5.16 | 6.75 | 5.16 | 9.92  |
| 23 | 5.51 | 5.11 | 6.95  | 10.28 | 9.27  | 5.28 | 5.3  | 2.72 | 7.8   |
| 24 | 5.99 | 6.49 | 6.86  | 9.73  | 8.77  | 4.71 | 7.18 | 4.44 | 9.54  |
| 25 | 6.57 | 2.77 | 9.78  | 9.79  | 8.7   | 5.5  | 5.88 | 3.77 | 10.46 |
| 26 | 6.46 | 5.37 | 9.94  | 9.65  | 8.23  | 5.49 | 6.43 | 4.99 | 11.39 |
| 27 | 5.35 | 5.71 | 8.59  | 9.27  | 8.21  | 4.79 | 8.71 | 4.63 | 11.48 |
| 28 | 7.74 | 6.32 | 8.53  | 7.8   | 7.79  | 7.67 | 7.47 | 6.78 | 8.5   |
| 29 | 7.85 | 6.74 | 8.54  | 7.8   | 7.75  | 7.79 | 7.47 | 6.95 | 8.37  |
| 30 | 7.35 | 6.57 | 8.24  | 7.47  | 7.44  | 7.98 | 7.02 | 6.57 | 8.23  |
| 31 | 5.37 | 6.26 | 6.78  | 8.69  | 8.34  | 4.59 | 8    | 2.82 | 9.66  |
| 32 | 5.57 | 5.35 | 6.26  | 6.77  | 7.89  | 3.68 | 8.49 | 2.59 | 11.69 |
| 33 | 6.2  | 5.5  | 7.63  | 8.51  | 8.7   | 5.57 | 6.89 | 1.11 | 10.84 |
| 34 | 5.06 | 5.74 | 5.94  | 7.54  | 9.55  | 3.74 | 8.58 | 2.48 | 11.81 |
| 35 | 7.11 | 5.77 | 8.01  | 6.89  | 6.5   | 7.47 | 6.54 | 6.15 | 7.71  |
| 36 | 6.56 | 5.42 | 8.12  | 6.78  | 6.63  | 6.91 | 6.36 | 5.46 | 7.26  |
| 37 | 7.07 | 5.45 | 8.17  | 6.69  | 6.46  | 6.7  | 6.19 | 5.53 | 7.37  |
| 38 | 7.74 | 5.81 | 7.52  | 7.33  | 6.69  | 8.08 | 6.43 | 6.53 | 8.18  |
| 39 | 6.73 | 5.73 | 7.71  | 7.06  | 6.76  | 6.62 | 7.09 | 5.79 | 7.31  |
| 40 | 7.14 | 5.85 | 7.18  | 7.05  | 6.8   | 6.52 | 6.88 | 6.27 | 7.81  |
| 41 | 6.58 | 6.19 | 7.47  | 6.67  | 6.89  | 6.8  | 6.97 | 6.17 | 8.06  |
| 42 | 8.32 | 3.41 | 6.22  | 7.84  | 5.41  | 7.46 | 5.22 | 5.22 | 9.31  |
| 43 | 7.51 | 6.45 | 8.56  | 7.73  | 7.85  | 7.85 | 7.84 | 6.64 | 8.15  |
| 44 | 8.1  | 6.99 | 8.92  | 7.91  | 8.03  | 8.19 | 7.79 | 6.95 | 8.45  |
| 45 | 6.95 | 5.57 | 8.67  | 7.77  | 7.54  | 7.08 | 6.62 | 5.77 | 7.82  |
| 46 | 7.59 | 6.52 | 8.64  | 7.67  | 7.68  | 7.81 | 7.56 | 6.74 | 8.16  |
| 47 | 7.47 | 6.4  | 8.01  | 8.27  | 7.51  | 7.31 | 7.1  | 6.48 | 8.87  |
| 48 | 7.9  | 6.72 | 8.78  | 8.23  | 7.28  | 7.8  | 7.62 | 7.13 | 8.73  |
| 49 | 7.41 | 7.35 | 7.96  | 8.26  | 7.75  | 7.92 | 8.06 | 7.08 | 8.38  |
| 50 | 8.15 | 6.95 | 8.17  | 8.15  | 7.44  | 8.09 | 7.5  | 7.16 | 8.89  |
| 51 | 7.01 | 5.72 | 7.42  | 9.04  | 7.11  | 7    | 7.29 | 5.43 | 8.27  |
| 52 | 6.5  | 6.34 | 7.15  | 9.78  | 7.28  | 7.15 | 7.86 | 5.53 | 8.41  |
| 53 | 7.08 | 6.01 | 7.54  | 9.67  | 7.42  | 7.19 | 8.09 | 5.56 | 8.81  |
| 54 |      |      |       |       |       |      |      |      |       |
| 55 |      |      |       |       |       |      |      |      |       |
| 56 |      |      |       |       |       |      |      |      |       |
| 57 |      |      |       |       |       |      |      |      |       |
| 58 |      |      |       |       |       |      |      |      |       |
| 59 |      |      |       |       |       |      |      |      |       |
| 60 |      |      |       |       |       |      |      |      |       |

|    |      |      |       |       |       |      |      |      |       |
|----|------|------|-------|-------|-------|------|------|------|-------|
| 1  |      |      |       |       |       |      |      |      |       |
| 2  | 6.64 | 6.46 | 7.41  | 9.51  | 7.5   | 7.11 | 7.85 | 6.05 | 8.39  |
| 3  | 6.73 | 6.69 | 7.71  | 10.57 | 10.76 | 7.05 | 7.81 | 5.6  | 9.98  |
| 4  | 7.09 | 6.72 | 7.98  | 10.39 | 10.36 | 7.55 | 8.1  | 5.7  | 9.98  |
| 5  | 6.67 | 5.7  | 8.07  | 10.69 | 10.88 | 8.39 | 6.93 | 5.7  | 8.82  |
| 6  | 6.94 | 6.04 | 8.13  | 10.84 | 10.94 | 8.09 | 6.92 | 5.69 | 8.73  |
| 7  | 8.8  | 7.13 | 9.18  | 9.31  | 8.14  | 7.45 | 7.96 | 5.72 | 9.76  |
| 8  | 8.1  | 6.75 | 10.27 | 10    | 9.58  | 6.43 | 7.16 | 5.37 | 11.86 |
| 9  | 7.89 | 6.55 | 9.62  | 10.19 | 9.74  | 6.69 | 6.42 | 4.68 | 10.81 |
| 10 | 7.89 | 6.83 | 9.45  | 9.11  | 8.61  | 6.7  | 6.5  | 5.6  | 12.96 |
| 11 | 8.11 | 5.81 | 9.46  | 9.97  | 8.97  | 6.97 | 8.1  | 4.46 | 8.37  |
| 12 | 8.38 | 6.32 | 8.75  | 10.07 | 7.95  | 6.78 | 8.23 | 4.97 | 10.31 |
| 13 | 8.58 | 6.61 | 8.97  | 10.22 | 8.81  | 6.55 | 8.63 | 4.38 | 9.92  |
| 14 | 8.36 | 6.06 | 9.16  | 10.27 | 7.85  | 6.76 | 7.69 | 4.31 | 9.43  |
| 15 | 7.38 | 6.14 | 8.05  | 9.48  | 8.37  | 6.38 | 7.04 | 4.9  | 7.87  |
| 16 | 8.02 | 6.09 | 8.05  | 10.06 | 9.8   | 5.51 | 6.66 | 3.09 | 9.56  |
| 17 | 7.46 | 6.43 | 7.8   | 8.82  | 8.02  | 5.9  | 7.34 | 5.32 | 11.12 |
| 18 | 6.67 | 7.67 | 8.27  | 8.62  | 8.62  | 5.12 | 7.74 | 4.95 | 10.27 |
| 19 | 7.27 | 6.22 | 8.36  | 9.33  | 9.5   | 5.99 | 8.34 | 3.84 | 10.26 |
| 20 | 6.63 | 6.56 | 8.22  | 8.55  | 8.93  | 4.61 | 8.85 | 4.69 | 10.66 |
| 21 | 8.03 | 5.91 | 8.53  | 9.17  | 7.78  | 6.4  | 7.15 | 3.84 | 9.79  |
| 22 | 8.04 | 4.83 | 9.83  | 9.26  | 8.76  | 5.27 | 8.67 | 1.87 | 10.48 |
| 23 | 8.25 | 3.39 | 9.98  | 9.78  | 8.97  | 4.84 | 6.42 | 2.06 | 9.23  |
| 24 | 5.81 | 5.86 | 8.23  | 9.46  | 9.82  | 7.5  | 7.11 | 5.35 | 10.54 |
| 25 | 6.66 | 6.48 | 8.26  | 10.24 | 9.63  | 7.56 | 7.21 | 5.18 | 10.11 |
| 26 | 7.74 | 5.15 | 10.12 | 9.67  | 8.85  | 7.61 | 6.74 | 4.15 | 11.97 |
| 27 | 5.06 | 6.8  | 5.06  | 7.81  | 6.63  | 4.06 | 4.68 | 4.45 | 8.3   |
| 28 | 6.55 | 6.38 | 6.46  | 7.84  | 9.52  | 5.25 | 5.96 | 4.25 | 9.73  |
| 29 | 6.73 | 5.44 | 6.58  | 8.62  | 9.22  | 4.57 | 6.6  | 3.35 | 8.69  |
| 30 | 5.9  | 6.15 | 6.07  | 8.13  | 8.76  | 1.9  | 6.99 | 1.9  | 10.62 |
| 31 | 6.4  | 6.46 | 7.73  | 6.89  | 6.97  | 7.73 | 6.66 | 5.57 | 7.37  |
| 32 | 6.83 | 5.63 | 7.64  | 7.13  | 7.13  | 7.5  | 6.15 | 6    | 7.92  |
| 33 | 7.03 | 6.34 | 7.64  | 7.15  | 6.72  | 7.92 | 6.79 | 6.31 | 7.13  |
| 34 | 6.89 | 5.71 | 7.67  | 6.96  | 7.04  | 8.05 | 6.96 | 6.04 | 7.6   |
| 35 | 6.58 | 5.57 | 6.91  | 8     | 9.13  | 6.07 | 5.8  | 4.4  | 6.42  |
| 36 | 6.77 | 5.59 | 7.59  | 7.91  | 7.38  | 6.36 | 5.68 | 5.66 | 8.56  |
| 37 | 6.52 | 5.65 | 7.37  | 7.95  | 7.47  | 6.21 | 6.57 | 4.77 | 8.91  |
| 38 | 6.14 | 5.74 | 7.01  | 7.82  | 7.73  | 5.99 | 7.52 | 4.78 | 9.62  |
| 39 | 2.68 | 7.71 | 2.68  | 8.01  | 6.05  | 5.21 | 2.35 | 3.81 | 8.05  |
| 40 | 8.7  | 5.37 | 9.42  | 9.06  | 8.71  | 6.11 | 7.46 | 4.63 | 10.04 |
| 41 | 5.42 | 6.63 | 8.33  | 9.13  | 9.57  | 5.37 | 4.94 | 5.23 | 8.69  |
| 42 | 6.63 | 6.32 | 10.02 | 8.85  | 6.63  | 5.93 | 5.55 | 6.82 | 10.58 |
| 43 | 8.07 | 5.71 | 10.39 | 9.59  | 6.75  | 6.27 | 7.15 | 4.74 | 9.06  |
| 44 | 6.1  | 6.51 | 9.15  | 8.42  | 6.1   | 5.51 | 4.51 | 4.51 | 11.21 |
| 45 | 7.24 | 5.75 | 8.82  | 9.92  | 8.94  | 5.15 | 8.37 | 3.68 | 11.06 |
| 46 | 6.94 | 5.84 | 8.58  | 9.97  | 7.41  | 5.18 | 9.28 | 2.94 | 10.8  |
| 47 | 7.02 | 3.68 | 8.27  | 10.09 | 5.97  | 7.16 | 3    | 2.27 | 10.22 |
| 48 | 7.71 | 5.15 | 7.82  | 9.47  | 7.38  | 6.97 | 6.71 | 4.31 | 10.37 |
| 49 | 7.28 | 5.49 | 7.73  | 9.73  | 7.72  | 6.4  | 6.34 | 3.86 | 10.9  |
| 50 | 7.28 | 5.58 | 7.45  | 9.21  | 7.6   | 7.04 | 6.52 | 5.11 | 10.43 |
| 51 | 7.31 | 5.91 | 6.8   | 8.8   | 8.59  | 5.43 | 6.71 | 1.89 | 8.84  |
| 52 | 7.31 | 5.57 | 6.59  | 8.44  | 7.51  | 6.2  | 6.92 | 4.62 | 10.13 |
| 53 | 7.08 | 5.45 | 6.24  | 8     | 7.38  | 6.19 | 7.06 | 4.83 | 10.13 |

<https://mc.manuscriptcentral.com/gut>

1  
2  
3  
4  
5  
6  
7  
8  
9  
10  
11  
12  
13  
14  
15  
16  
17  
18  
19  
20  
21  
22  
23  
24  
25  
26  
27  
28  
29  
30  
31  
32  
33  
34  
35  
36  
37  
38  
39  
40  
41  
42  
43  
44  
45  
46  
47  
48  
49  
50  
51  
52  
53  
54  
55  
56  
57  
58  
59  
60

|      |      |      |      |       |      |      |      |       |
|------|------|------|------|-------|------|------|------|-------|
| 8.03 | 4.6  | 6.65 | 8.37 | 7.67  | 5.43 | 6.46 | 2.37 | 10.38 |
| 7.19 | 3.91 | 7.62 | 8.33 | 6.23  | 6.93 | 7.33 | 2.1  | 9.62  |
| 7.03 | 3.91 | 7.53 | 8.09 | 8.47  | 6.49 | 6.47 | 3.39 | 8.34  |
| 7.23 | 3.66 | 7.67 | 8.21 | 8.87  | 6.29 | 6.07 | 2.49 | 7.64  |
| 7.84 | 5.36 | 8.3  | 6.84 | 6.64  | 7.93 | 6.46 | 5.95 | 8.62  |
| 7.05 | 5.59 | 8.25 | 8.39 | 7.96  | 3.02 | 7.05 | 2.73 | 9.08  |
| 7.39 | 4.74 | 7.08 | 8.32 | 6.36  | 3.07 | 5.35 | 3.07 | 7.08  |
| 7.51 | 4.48 | 7.13 | 8.31 | 6.64  | 2.67 | 4.67 | 2.67 | 6.72  |
| 7.38 | 6.18 | 7.97 | 7.12 | 7.35  | 7.44 | 7.43 | 6.54 | 7.83  |
| 6.56 | 6.09 | 7.33 | 7.63 | 8.05  | 6.72 | 7.2  | 5.45 | 9.52  |
| 5.46 | 6.37 | 7.18 | 8.89 | 9.1   | 5.18 | 7.46 | 3.11 | 9     |
| 6.53 | 6.06 | 7.52 | 8.28 | 8.78  | 6.47 | 7.81 | 3.47 | 10.08 |
| 6.49 | 6.08 | 7.51 | 8.35 | 8.75  | 5.79 | 6.87 | 3.76 | 11.08 |
| 6.08 | 6.26 | 6.76 | 7.93 | 10.25 | 6.13 | 8.33 | 3.71 | 11.44 |
| 9.38 | 4.13 | 9.04 | 9.47 | 6.45  | 5.71 | 4.87 | 3.54 | 9.6   |
| 7.33 | 5.91 | 7.28 | 9.3  | 7.58  | 5.42 | 6.05 | 5.23 | 9.7   |
| 6.91 | 6.07 | 7.39 | 8.75 | 8.2   | 5.82 | 6.1  | 5.19 | 9.4   |
| 7.42 | 5.64 | 7.43 | 9.47 | 7.48  | 5.53 | 6    | 5.24 | 9.91  |

1  
2  
3  
4  
5  
6  
7  
8  
9  
10  
11  
12  
13  
14  
15  
16  
17  
18  
19  
20  
21  
22  
23  
24  
25  
26  
27  
28  
29  
30  
31  
32  
33  
34  
35  
36  
37  
38  
39  
40  
41  
42  
43  
44  
45  
46  
47  
48  
49  
50  
51  
52  
53  
54  
55  
56  
57  
58  
59  
60

| FBLN5 | FBN1 | FBN2 | FBP1 | FERMT2 | FGF18 | FGF2 | FGF9 | FGFR1 |
|-------|------|------|------|--------|-------|------|------|-------|
| 8.24  | 7.41 | 6.34 | 7.4  | 6.82   | 2.88  | 4.77 | 6.66 | 7.54  |
| 7.18  | 6.74 | 6.12 | 9.48 | 7.34   | 2.42  | 5.23 | 5.67 | 7.67  |
| 6.93  | 6.65 | 6.42 | 8.62 | 7.09   | 2.67  | 4.73 | 6.11 | 7.57  |
| 8.24  | 9.13 | 4.88 | 9.47 | 8.63   | 4.93  | 7.41 | 4.35 | 8.8   |
| 6.96  | 3.59 | 7.89 | 5.87 | 6.62   | 3.33  | 3.82 | 8.38 | 7.44  |
| 7.46  | 7.64 | 6    | 8.62 | 7.28   | 3.19  | 4.58 | 6.29 | 7.36  |
| 7.63  | 7.39 | 5.65 | 8.6  | 7.23   | 2.24  | 5.59 | 6.31 | 7.54  |
| 7.56  | 9.01 | 3.56 | 9.27 | 8.34   | 5.15  | 5.6  | 3.39 | 8.54  |
| 7.04  | 8.49 | 4.54 | 8.98 | 7.8    | 3.69  | 5.5  | 2.37 | 7.71  |
| 6.68  | 7.15 | 5.58 | 8.28 | 7.03   | 2.23  | 4.55 | 5.16 | 7.11  |
| 6.67  | 7.31 | 5.33 | 9.39 | 7.62   | 3.84  | 5.99 | 3.19 | 7.26  |
| 7.55  | 8.35 | 4.59 | 8.85 | 8.46   | 4.68  | 7.04 | 3.49 | 8.29  |
| 6.87  | 6.83 | 5.77 | 8.95 | 6.51   | 3.94  | 5.02 | 7.28 | 7.24  |
| 7.44  | 8.42 | 6.23 | 8.35 | 7.51   | 3.76  | 5.23 | 7.37 | 8.04  |
| 6.67  | 9.75 | 1.77 | 8.28 | 8.44   | 6.67  | 6.23 | 4.58 | 10.14 |
| 7.21  | 7.45 | 5.99 | 7.54 | 7.51   | 4.4   | 5.7  | 6.92 | 7.93  |
| 7.8   | 7.9  | 6.38 | 8.13 | 7.52   | 5.29  | 5.54 | 6.29 | 8.46  |
| 7.33  | 8.73 | 6.05 | 6.69 | 8.38   | 6.38  | 6.12 | 6.41 | 8.8   |
| 6.94  | 8.77 | 3.48 | 7.03 | 8.05   | 4.65  | 5.57 | 5.96 | 8.47  |
| 7.71  | 8.13 | 5.24 | 8.51 | 7.87   | 3.89  | 6.26 | 5.01 | 7.92  |
| 7.9   | 8.52 | 3.08 | 8.01 | 8.56   | 4.36  | 6.78 | 5.36 | 8.65  |
| 9.04  | 8.88 | 8.58 | 8.19 | 9.02   | 4.32  | 7.19 | 4.67 | 8.75  |
| 8.83  | 8.37 | 7.54 | 8.62 | 8.8    | 4.59  | 7.04 | 4.9  | 8.68  |
| 9.01  | 8.89 | 7.39 | 8.74 | 9.43   | 4.85  | 7.65 | 4.48 | 9.14  |
| 6.36  | 6.15 | 5.67 | 8.84 | 8.37   | 3.01  | 5.28 | 3.89 | 8.79  |
| 6.56  | 6.3  | 5.26 | 8.59 | 6.82   | 4.13  | 5.17 | 3.13 | 6.87  |
| 6.79  | 6.35 | 5.11 | 8.47 | 5.91   | 4.77  | 4.33 | 3.11 | 6.63  |
| 7.3   | 6.14 | 5.8  | 8.9  | 6.76   | 4.82  | 5.56 | 5.31 | 7.23  |
| 6.82  | 6.74 | 6.28 | 8.83 | 6.19   | 2.7   | 3.6  | 5.56 | 7.11  |
| 6.7   | 6.78 | 5.7  | 8.62 | 7.02   | 3.68  | 6.87 | 6.11 | 7.42  |
| 6.67  | 6.28 | 5.55 | 9.02 | 6.66   | 3.2   | 5.84 | 5.59 | 6.91  |
| 7.28  | 7.48 | 6.13 | 8.19 | 7.1    | 1.71  | 4.41 | 6.97 | 7.61  |
| 6.91  | 6.4  | 6.28 | 6.72 | 6.65   | 3.05  | 5.23 | 5.57 | 7.91  |
| 8.02  | 9.35 | 4.92 | 9.69 | 8.93   | 6.1   | 6.53 | 3.97 | 8.74  |
| 7.17  | 8.05 | 5.76 | 9.84 | 8.34   | 6.02  | 6    | 3.31 | 8.16  |
| 7.49  | 9.12 | 4.86 | 9.77 | 8.7    | 6.35  | 6.3  | 3.28 | 8.45  |
| 5.03  | 7.1  | 3.77 | 7.76 | 6.85   | 2.03  | 4.25 | 2.77 | 7.47  |
| 5.99  | 7.24 | 3.65 | 8.4  | 6.9    | 1.99  | 5.83 | 0    | 6.92  |
| 6.76  | 8.03 | 4.45 | 7.13 | 6.72   | 2.37  | 5.89 | 2.69 | 7.43  |
| 6.22  | 7.69 | 3.74 | 7.7  | 7.06   | 2.33  | 5.91 | 2.74 | 7.37  |
| 6.78  | 6.99 | 5.87 | 8.11 | 6.61   | 3.68  | 4.21 | 5.92 | 7.23  |
| 6.76  | 6.95 | 5.85 | 8.34 | 6.7    | 2.48  | 4.42 | 5.68 | 7.16  |
| 6.61  | 6.83 | 5.92 | 8.22 | 6.39   | 3.03  | 4.03 | 6.1  | 6.95  |
| 6.69  | 6.91 | 5.06 | 9.23 | 6.47   | 2.98  | 4.72 | 4.9  | 7.2   |
| 3.86  | 7.45 | 4.86 | 6.77 | 7.45   | 4.45  | 3.86 | 6.18 | 7.5   |
| 8.08  | 6.99 | 4.96 | 8    | 7.36   | 3.12  | 6.1  | 3.9  | 7.31  |
| 7.94  | 8    | 6.49 | 7.54 | 7.7    | 3.81  | 6.13 | 4    | 7.73  |
| 8.51  | 8.78 | 6.9  | 7.14 | 8.69   | 3.9   | 6.76 | 4.45 | 8.61  |
| 7.9   | 8.54 | 4.09 | 8.66 | 7.75   | 5.54  | 5.44 | 5.16 | 8.37  |
| 7.38  | 8.43 | 4.47 | 7.67 | 7.65   | 3.82  | 6.18 | 3.59 | 8.43  |
| 7.51  | 7.69 | 4.95 | 8.69 | 7.06   | 4.67  | 5.54 | 3.5  | 7.76  |

<https://mc.manuscriptcentral.com/gut>



|    |      |      |      |       |      |      |      |      |      |
|----|------|------|------|-------|------|------|------|------|------|
| 1  |      |      |      |       |      |      |      |      |      |
| 2  | 7.91 | 8.66 | 4.72 | 8.25  | 8.28 | 4.47 | 6.08 | 3.66 | 8.39 |
| 3  | 7.24 | 7.34 | 5.35 | 8.34  | 6.32 | 3.94 | 4.62 | 5.86 | 6.98 |
| 4  | 7.29 | 7.02 | 6.02 | 7.86  | 7.23 | 4.94 | 6.34 | 6.85 | 7.88 |
| 5  | 6.85 | 7.12 | 5.41 | 8.24  | 7.05 | 4.86 | 6.18 | 6.29 | 7.76 |
| 6  | 7.6  | 7.25 | 5.67 | 8.07  | 7.18 | 4.97 | 5.97 | 6.86 | 8.04 |
| 7  | 7.5  | 7.58 | 5.44 | 10.47 | 7.33 | 3.4  | 5.04 | 3.93 | 7.84 |
| 8  | 7.43 | 7.21 | 4.42 | 10.6  | 7.55 | 3.57 | 5.46 | 3.71 | 7.3  |
| 9  | 5.62 | 6.37 | 4.05 | 10.95 | 6.27 | 2.91 | 4.43 | 4.53 | 6.14 |
| 10 | 7.55 | 7.82 | 4.61 | 10.67 | 8.33 | 2.44 | 6.74 | 4.25 | 8.21 |
| 11 | 6.51 | 7.08 | 4.39 | 7.8   | 6.15 | 4.04 | 4.75 | 4.49 | 7.6  |
| 12 | 6.92 | 6.93 | 4.71 | 8.3   | 7    | 4.35 | 5.75 | 4.45 | 7.86 |
| 13 | 6.08 | 6.6  | 4.62 | 7.27  | 6.52 | 6.02 | 5.24 | 3.27 | 7.52 |
| 14 | 7.12 | 7.24 | 4.15 | 7.34  | 7.48 | 4.98 | 6.19 | 3.56 | 8.07 |
| 15 | 6.74 | 5.15 | 7.15 | 7.96  | 5.15 | 9.24 | 5.15 | 7.15 | 6.74 |
| 16 | 5.11 | 7.7  | 6.65 | 7.83  | 7.06 | 5.43 | 4.6  | 7.15 | 7.46 |
| 17 | 6.24 | 7.33 | 6.76 | 7.98  | 6.94 | 3.74 | 4.56 | 6.77 | 7.54 |
| 18 | 7.08 | 4.15 | 8.32 | 5.67  | 6.18 | 1.24 | 4.64 | 8.46 | 7.65 |
| 19 | 6.98 | 4.86 | 7.83 | 5.58  | 6.1  | 3.94 | 3.77 | 8.37 | 7.4  |
| 20 | 5.57 | 5.43 | 5.95 | 9.4   | 6.25 | 5.6  | 3.6  | 6.39 | 6.57 |
| 21 | 5.26 | 5.04 | 5.74 | 9.8   | 5.77 | 5.3  | 3.58 | 6.35 | 6.53 |
| 22 | 6.52 | 6.15 | 6.01 | 9.63  | 6.54 | 5.86 | 4.58 | 6.78 | 7.03 |
| 23 | 8.78 | 8.41 | 3.56 | 11.23 | 7.85 | 4.62 | 6.6  | 4.27 | 8.34 |
| 24 | 8.34 | 7.75 | 5.03 | 10.79 | 7.7  | 4.53 | 6.28 | 4.86 | 8.15 |
| 25 | 8.7  | 8.18 | 6.8  | 10.47 | 8.35 | 4.51 | 6.33 | 6.86 | 8.32 |
| 26 | 8.05 | 7.65 | 6.36 | 10.06 | 7.57 | 6.13 | 6.1  | 7.18 | 8.53 |
| 27 | 8.07 | 8.03 | 5.53 | 9.54  | 8.14 | 7.16 | 6.31 | 7.57 | 8.98 |
| 28 | 8.55 | 8.54 | 5.86 | 9.21  | 8.12 | 7.57 | 6.62 | 7.98 | 9.46 |
| 29 | 6.47 | 6.49 | 6.09 | 8.36  | 7.14 | 4.17 | 5.88 | 6.11 | 6.96 |
| 30 | 6.85 | 7.23 | 5.93 | 7.98  | 7.83 | 2.79 | 5.81 | 6.17 | 7.33 |
| 31 | 7.05 | 7.08 | 6.24 | 8.3   | 7.47 | 3.15 | 5.93 | 6.53 | 7.41 |
| 32 | 8.24 | 8.16 | 6.59 | 8.84  | 7.82 | 5.44 | 6.1  | 7.33 | 7.98 |
| 33 | 6.74 | 6.57 | 6.43 | 9.24  | 7.34 | 4.01 | 5.29 | 7.25 | 7.52 |
| 34 | 7.02 | 6.72 | 6.98 | 9.05  | 6.78 | 4.24 | 4.94 | 7.58 | 7.68 |
| 35 | 7.1  | 7.71 | 6.39 | 7.83  | 7.89 | 3.05 | 5.4  | 6.34 | 8.23 |
| 36 | 7.06 | 7.22 | 6.59 | 8.04  | 7.54 | 2.88 | 4.88 | 6.65 | 8.18 |
| 37 | 7.39 | 8.27 | 6.62 | 7.36  | 8    | 2.92 | 5.41 | 6.4  | 8.72 |
| 38 | 7.46 | 7.67 | 7.02 | 7.92  | 7.91 | 3.9  | 6.02 | 6.93 | 8.15 |
| 39 | 7.46 | 7.67 | 7.02 | 7.92  | 7.91 | 3.9  | 6.02 | 6.93 | 8.15 |
| 40 | 7.42 | 7.04 | 6.72 | 7.98  | 7.86 | 4.67 | 6.08 | 6.85 | 8.1  |
| 41 | 7.74 | 7.75 | 6.85 | 8.37  | 8.46 | 4.64 | 6.73 | 7.02 | 8.6  |
| 42 | 7.98 | 8.52 | 7.11 | 7.93  | 8.21 | 5.49 | 6.48 | 7.19 | 8.6  |
| 43 | 7.31 | 5.51 | 7.38 | 6.08  | 7.03 | 3.14 | 5.14 | 7.11 | 8.04 |
| 44 | 7.64 | 7.44 | 7.16 | 6.87  | 7.54 | 3.62 | 6.62 | 6.58 | 8.19 |
| 45 | 7.21 | 7.42 | 6.72 | 8.44  | 7.52 | 3.12 | 5.95 | 6.04 | 7.33 |
| 46 | 7.71 | 7.71 | 7.12 | 7.33  | 7.97 | 4.07 | 5.82 | 7.09 | 8.15 |
| 47 | 6.53 | 8.15 | 5.46 | 9.37  | 7.81 | 5.28 | 5.88 | 3.43 | 8.05 |
| 48 | 5.69 | 7.11 | 6.19 | 9.93  | 7.04 | 3.88 | 5.03 | 2.4  | 7.28 |
| 49 | 5.47 | 8.37 | 4.98 | 9.37  | 8.12 | 5.32 | 4.84 | 3.32 | 8.15 |
| 50 | 7.54 | 6.81 | 7.04 | 7.14  | 7.21 | 3.48 | 5.91 | 7.05 | 7.91 |
| 51 | 7.9  | 8.61 | 6.85 | 7.17  | 8.61 | 3.47 | 6.76 | 6.86 | 8.79 |
| 52 | 7.65 | 8.13 | 6.98 | 6.74  | 8.54 | 4.36 | 6.29 | 7.04 | 8.51 |
| 53 | 6.4  | 7.01 | 6.95 | 8.32  | 6.81 | 1.4  | 5.48 | 6.94 | 7.6  |

1  
2  
3  
4  
5  
6  
7  
8  
9  
10  
11  
12  
13  
14  
15  
16  
17  
18  
19  
20  
21  
22  
23  
24  
25  
26  
27  
28  
29  
30  
31  
32  
33  
34  
35  
36  
37  
38  
39  
40  
41  
42  
43  
44  
45  
46  
47  
48  
49  
50  
51  
52  
53  
54  
55  
56  
57  
58  
59  
60

|      |       |      |       |      |      |      |      |      |
|------|-------|------|-------|------|------|------|------|------|
| 6.77 | 7.45  | 6.56 | 8.27  | 7.56 | 2.89 | 6.28 | 6.23 | 7.57 |
| 6.66 | 8.29  | 7.39 | 6.74  | 7.62 | 3.36 | 5.51 | 7.3  | 8.1  |
| 8.1  | 6.97  | 5.35 | 7.87  | 7.48 | 4.2  | 5.96 | 3.89 | 8.31 |
| 8.57 | 8.54  | 6.18 | 8.84  | 8    | 4.66 | 6.8  | 4.66 | 8.7  |
| 9.14 | 9.76  | 5.95 | 9.13  | 8.79 | 5.98 | 7.3  | 5.74 | 9.32 |
| 6.91 | 8.62  | 4.93 | 7.16  | 7.72 | 4.31 | 5.11 | 2.73 | 8.28 |
| 6.45 | 7.9   | 6.37 | 9.06  | 7.21 | 2.72 | 5.3  | 1.55 | 7.29 |
| 6.73 | 8.27  | 5.28 | 8.57  | 7.69 | 2.93 | 5.71 | 2.56 | 7.39 |
| 5.66 | 9.8   | 4.08 | 8.49  | 9.03 | 5.66 | 5.82 | 3.49 | 9.06 |
| 7.11 | 8.52  | 5.38 | 10.64 | 7.65 | 1.79 | 4.88 | 6.65 | 7.8  |
| 6.74 | 7.01  | 2.49 | 10.34 | 7.08 | 3.95 | 5.25 | 3.3  | 7.18 |
| 6.41 | 6.04  | 5.62 | 9.74  | 6.46 | 2.21 | 3.89 | 5.41 | 7.41 |
| 5.58 | 10.07 | 5.26 | 9.51  | 8.69 | 7.58 | 5.07 | 4.26 | 9.13 |
| 7.54 | 3.37  | 6.86 | 6.28  | 7    | 2.2  | 3.52 | 8.89 | 8.35 |
| 5.9  | 7.66  | 5.16 | 8.64  | 6.53 | 3.75 | 5.3  | 3.65 | 6.39 |
| 5.39 | 7.14  | 4.54 | 8.54  | 6.33 | 3.64 | 5.59 | 2.16 | 6.39 |
| 6.41 | 7.38  | 4.81 | 8.81  | 6.89 | 3.52 | 4.98 | 2.69 | 6.97 |
| 7.22 | 8.13  | 4.34 | 9.4   | 7.09 | 2.24 | 5.08 | 3.52 | 7.43 |
| 6.91 | 8.05  | 5.7  | 8.24  | 6.93 | 2.47 | 4.55 | 5.31 | 7.75 |
| 6.8  | 7.96  | 4.95 | 9.29  | 7.02 | 2.98 | 4.89 | 4.3  | 7.69 |
| 6.16 | 9.25  | 7.16 | 5.16  | 8.16 | 9.16 | 5.16 | 7.75 | 7.49 |
| 5.78 | 5.95  | 4.72 | 9.33  | 6.73 | 2.13 | 5.22 | 4.34 | 6.55 |
| 7.11 | 6.94  | 4.78 | 9.28  | 7.11 | 3.71 | 5.78 | 5.12 | 7.37 |
| 7.18 | 7.88  | 4.18 | 8.04  | 8.15 | 4.18 | 5.5  | 3.99 | 8.69 |
| 7.17 | 8.92  | 4.23 | 8.38  | 8.42 | 5.23 | 5.81 | 4.08 | 9.33 |
| 8.28 | 9.14  | 5.24 | 7.81  | 8.22 | 5.13 | 6    | 5.54 | 9.05 |
| 6.9  | 5     | 7.08 | 6.24  | 6.35 | 2    | 4.32 | 7.67 | 7.76 |
| 6.83 | 4.03  | 7.54 | 5.61  | 6.56 | 0.86 | 4.44 | 7.75 | 7.56 |
| 6.77 | 4.57  | 7.65 | 5.47  | 6.67 | 2.77 | 4.09 | 7.41 | 7.72 |
| 8.52 | 8.3   | 5.01 | 7.74  | 7.29 | 3.59 | 5.33 | 2.33 | 7.62 |
| 8.44 | 8.66  | 5.59 | 6.58  | 8.49 | 4.29 | 6.8  | 3.29 | 8.91 |
| 7.38 | 8.17  | 3.57 | 7.28  | 8.03 | 4.43 | 6.52 | 3.81 | 8.25 |
| 9.09 | 8.84  | 4.8  | 6.33  | 8.34 | 5.2  | 6.96 | 4.86 | 8.94 |
| 6.01 | 4.62  | 6.68 | 5.15  | 6.07 | 2.45 | 2.77 | 7.15 | 6.75 |
| 6.18 | 4.06  | 6.76 | 5.46  | 5.68 | 1.25 | 2.25 | 6.76 | 6.88 |
| 5.23 | 4.99  | 6.49 | 5.74  | 5.25 | 3.15 | 2.51 | 6.8  | 6.64 |
| 5.66 | 3.02  | 7.46 | 4.41  | 5.63 | 0    | 3.23 | 7.53 | 6.75 |
| 5.86 | 3.66  | 6.95 | 4.66  | 5.98 | 1.34 | 2.92 | 6.76 | 6.89 |
| 6    | 4.9   | 6.83 | 4.8   | 6.23 | 1.1  | 3.1  | 6.85 | 6.96 |
| 6.12 | 5.48  | 6.92 | 5.31  | 6.22 | 2.31 | 3.12 | 6.89 | 6.88 |
| 4    | 4.41  | 8.11 | 5.22  | 5    | 2.41 | 2.41 | 7.32 | 5    |
| 7.32 | 4.38  | 7.8  | 6.23  | 6.41 | 1.06 | 3.38 | 7.55 | 7.76 |
| 7.59 | 3.13  | 8.22 | 5.5   | 6.97 | 0    | 3.79 | 8.1  | 8.18 |
| 6.54 | 5.12  | 6.75 | 7.95  | 6.73 | 3.45 | 3.19 | 6.75 | 7.17 |
| 6.99 | 4.84  | 7.63 | 6.16  | 6.56 | 2.07 | 3.56 | 7.47 | 7.42 |
| 6.51 | 6.4   | 6.81 | 6.94  | 6.87 | 3.11 | 5.05 | 7.11 | 7.74 |
| 6.62 | 5.75  | 7.35 | 6.1   | 7.14 | 2.88 | 1.88 | 7.86 | 7.92 |
| 6.97 | 3.71  | 7.53 | 5.23  | 6.92 | 0.71 | 3.29 | 7.89 | 7.99 |
| 6.74 | 6.51  | 7.93 | 5.9   | 7.19 | 3.22 | 3.48 | 7.85 | 7.7  |
| 6.89 | 6.6   | 6.32 | 8.31  | 6.2  | 2.23 | 4.08 | 5.47 | 6.6  |
| 6.49 | 6.94  | 6.1  | 8.29  | 6.39 | 3.33 | 4.65 | 6.12 | 6.58 |
| 6.61 | 6.58  | 6.19 | 8.11  | 6.39 | 2.04 | 5.21 | 6.19 | 6.75 |

<https://mc.manuscriptcentral.com/gut>

1  
2  
3  
4  
5  
6  
7  
8  
9  
10  
11  
12  
13  
14  
15  
16  
17  
18  
19  
20  
21  
22  
23  
24  
25  
26  
27  
28  
29  
30  
31  
32  
33  
34  
35  
36  
37  
38  
39  
40  
41  
42  
43  
44  
45  
46  
47  
48  
49  
50  
51  
52  
53  
54  
55  
56  
57  
58  
59  
60

|      |      |      |       |       |      |      |      |       |
|------|------|------|-------|-------|------|------|------|-------|
| 6.87 | 6.64 | 6.1  | 8.4   | 6.52  | 2.27 | 4.66 | 6.5  | 6.7   |
| 8.28 | 8.04 | 6.16 | 6.78  | 7.48  | 3.98 | 5.22 | 5.52 | 8.01  |
| 8.32 | 8.13 | 6.45 | 7.85  | 7.82  | 3.24 | 5.86 | 6.18 | 7.96  |
| 7.37 | 7.06 | 6.26 | 6.52  | 6.55  | 2.33 | 3.91 | 6.26 | 7.26  |
| 7.22 | 7.19 | 6.14 | 7.13  | 6.8   | 2.76 | 3.48 | 6.16 | 7.32  |
| 7.77 | 7.9  | 6.44 | 7.35  | 7.53  | 4.16 | 6.24 | 6.35 | 8.56  |
| 7.99 | 8.4  | 3.43 | 9.23  | 8.32  | 4.75 | 6.49 | 3.84 | 8.61  |
| 7.95 | 7.62 | 4.07 | 7.87  | 7.62  | 3.3  | 6.37 | 2.98 | 8.2   |
| 8.7  | 9.45 | 4.2  | 8.17  | 9.67  | 5.2  | 7.96 | 4.44 | 9.98  |
| 6.41 | 8.07 | 6.19 | 10.23 | 7.91  | 5.16 | 5.35 | 5.22 | 7.98  |
| 7.95 | 8.72 | 5.52 | 9.71  | 8.04  | 5.17 | 6.23 | 5.21 | 8.39  |
| 8.09 | 8.67 | 5.63 | 9.88  | 8.35  | 5.14 | 6.47 | 5.47 | 8.53  |
| 8.09 | 8.39 | 4.87 | 10.06 | 8.36  | 5.46 | 6.39 | 4.46 | 8.49  |
| 7.09 | 6.42 | 5.85 | 9.58  | 6.35  | 2.48 | 5.06 | 5.69 | 7.2   |
| 7.32 | 6.98 | 4.79 | 10.29 | 7.01  | 3.42 | 6.08 | 3.6  | 7.4   |
| 8.05 | 8.77 | 5.85 | 8.44  | 8.82  | 5.19 | 6.87 | 5.76 | 9.11  |
| 8.89 | 8.26 | 5.17 | 7.5   | 7.28  | 2.8  | 5.35 | 3.58 | 8.35  |
| 7.73 | 8.37 | 6.13 | 9.59  | 7.47  | 3.99 | 5.91 | 3.25 | 8.02  |
| 7.43 | 9.07 | 6.5  | 8.52  | 8.97  | 5.04 | 7.35 | 3.33 | 9.02  |
| 8.01 | 8.13 | 3.63 | 8.83  | 6.93  | 3.63 | 5.66 | 3.74 | 7.63  |
| 7.18 | 8.42 | 6.26 | 7.67  | 7.86  | 3.94 | 6.5  | 1.87 | 8.1   |
| 5.89 | 7.07 | 5.76 | 7.76  | 6.49  | 5.54 | 5.06 | 4.12 | 7.06  |
| 7.76 | 7.17 | 5.5  | 8.26  | 7.9   | 3.91 | 5.69 | 6.28 | 8.49  |
| 7.45 | 7.29 | 5.63 | 8.82  | 7.39  | 4.39 | 6.14 | 5.79 | 8.28  |
| 7.32 | 9.72 | 4.15 | 8.28  | 10.19 | 7.06 | 7.47 | 6.61 | 10.58 |
| 7.18 | 6.41 | 4.36 | 9.01  | 6.67  | 3.17 | 5.61 | 4.27 | 6.99  |
| 7.18 | 6.9  | 6.11 | 8.29  | 7.15  | 2.38 | 6.08 | 4.49 | 7.41  |
| 6.58 | 6.98 | 5.81 | 8.17  | 6.32  | 0.76 | 5.19 | 4.72 | 6.84  |
| 7.92 | 6.54 | 3.48 | 8.13  | 9.02  | 1.9  | 6.85 | 2.9  | 8.28  |
| 6.01 | 1.76 | 7.04 | 5.46  | 5.76  | 1.76 | 1.76 | 6.8  | 7.15  |
| 6.42 | 6.04 | 6.47 | 5.47  | 6.6   | 3.3  | 3.04 | 7.04 | 7.2   |
| 5.79 | 1.88 | 7.05 | 4.21  | 5.97  | 0.88 | 2.47 | 7.21 | 7.19  |
| 6.54 | 4.54 | 6.86 | 4.28  | 5.91  | 0.96 | 2.54 | 7.17 | 6.79  |
| 5.51 | 4.79 | 5.43 | 7.85  | 5.66  | 1.36 | 3.53 | 5.49 | 6.18  |
| 6.58 | 5.36 | 5.36 | 7.62  | 6.4   | 1.98 | 5.09 | 5.47 | 6.49  |
| 6.81 | 6.51 | 5.7  | 7.03  | 6.91  | 1.77 | 5.7  | 5.47 | 7.01  |
| 6.71 | 6.74 | 5.96 | 6.56  | 7.25  | 2.34 | 5.38 | 5.63 | 7.47  |
| 6.78 | 6.14 | 4.26 | 6.11  | 7.01  | 2.35 | 5.91 | 3.16 | 7.82  |
| 7.9  | 7.48 | 5.55 | 8.64  | 7.37  | 3.05 | 6.42 | 5.46 | 8     |
| 6.61 | 6.93 | 5.17 | 8     | 6.94  | 3    | 5.33 | 5.51 | 6.91  |
| 5.23 | 8.89 | 3.23 | 7.14  | 7.63  | 6.23 | 5.23 | 5.82 | 8.55  |
| 7.33 | 7.04 | 4.95 | 8.16  | 6.72  | 2.18 | 4.55 | 5.85 | 7.4   |
| 4.51 | 9.68 | 4.51 | 6.1   | 6.83  | 6.1  | 4.51 | 6.51 | 8.1   |
| 7.91 | 8.39 | 4.91 | 8.59  | 7.48  | 3.68 | 5.91 | 2.87 | 8.19  |
| 7.82 | 9.13 | 3.39 | 8.47  | 8.52  | 4.02 | 6.68 | 1.52 | 8.65  |
| 4.93 | 3.85 | 0.68 | 7.82  | 5.21  | 4.14 | 1.68 | 3    | 6.04  |
| 6.67 | 7.66 | 4.89 | 9.15  | 7.63  | 4.94 | 5.96 | 4.94 | 7.79  |
| 6.77 | 7.32 | 4.18 | 8.54  | 7.7   | 4.92 | 5.83 | 4.08 | 7.93  |
| 7.1  | 6.91 | 5.87 | 8.94  | 7.66  | 4.26 | 6.04 | 5.9  | 8.08  |
| 8.59 | 8.32 | 6.22 | 7.94  | 7.32  | 2.57 | 5.35 | 1.89 | 7.46  |
| 7.76 | 7.41 | 4.85 | 7.05  | 7.07  | 2.85 | 5.99 | 4.11 | 7.69  |
| 7.62 | 7.37 | 4.83 | 6.8   | 6.7   | 4.16 | 6    | 5.19 | 7.71  |

<https://mc.manuscriptcentral.com/gut>

|      |      |      |      |      |      |      |      |      |
|------|------|------|------|------|------|------|------|------|
| 7.99 | 8.31 | 2.79 | 7.31 | 8.63 | 5.04 | 7.2  | 4.37 | 8.58 |
| 8.1  | 8.73 | 5.62 | 5.8  | 6.91 | 4.42 | 4.1  | 4.42 | 8.13 |
| 5.91 | 6.74 | 5.17 | 6.42 | 6.59 | 3.17 | 5.59 | 4.67 | 7.41 |
| 6.16 | 6.96 | 5.7  | 6.68 | 6.13 | 3.29 | 3.95 | 4.49 | 7.16 |
| 5.64 | 6.98 | 6.46 | 4.55 | 7.01 | 3.88 | 3.55 | 6.98 | 7.8  |
| 6.93 | 7.55 | 2.73 | 7.71 | 6.88 | 3.47 | 5.42 | 1.15 | 7.23 |
| 5.09 | 5.82 | 2.07 | 8.23 | 5.09 | 1.39 | 3.77 | 2.53 | 5.07 |
| 4.94 | 5.5  | 2.35 | 7.94 | 4.78 | 1.67 | 3.67 | 2.52 | 5.05 |
| 6.65 | 2.86 | 7.24 | 4.27 | 6.48 | 0.27 | 2.59 | 7.29 | 7.19 |
| 6.88 | 6.63 | 6.78 | 7    | 6.78 | 1.55 | 5.09 | 6.48 | 7.3  |
| 9.22 | 8.15 | 4.65 | 8.1  | 7.1  | 3.9  | 5.82 | 3.97 | 7.66 |
| 8.73 | 7.63 | 4.8  | 7.78 | 7.56 | 3.7  | 6.62 | 5.28 | 7.72 |
| 9.03 | 8.1  | 4.55 | 9.15 | 8.23 | 3.89 | 6.64 | 4.69 | 8.43 |
| 10.5 | 9.23 | 5.52 | 7.53 | 7.85 | 4.59 | 6.67 | 5.65 | 8.67 |
| 4.87 | 9.2  | 2.54 | 7.19 | 6.87 | 6.94 | 4.54 | 3.54 | 7.71 |
| 6.29 | 6.51 | 3.26 | 9.19 | 7.11 | 2.97 | 4.93 | 3.97 | 7.22 |
| 7.05 | 6.4  | 5.4  | 8.94 | 6.45 | 2.04 | 5.36 | 5.36 | 6.75 |
| 5.94 | 6.73 | 4.28 | 9.22 | 7.27 | 3.45 | 4.51 | 4.15 | 7.02 |

1  
2  
3  
4  
5  
6  
7  
8  
9  
10  
11  
12  
13  
14  
15  
16  
17  
18  
19  
20  
21  
22  
23  
24  
25  
26  
27  
28  
29  
30  
31  
32  
33  
34  
35  
36  
37  
38  
39  
40  
41  
42  
43  
44  
45  
46  
47  
48  
49  
50  
51  
52  
53  
54  
55  
56  
57  
58  
59  
60

| FGFR2 | FGFR3 | FGFR4 | FGL2 | FHL1  | FIGF | FLI1 | FLT1 | FLT4 |
|-------|-------|-------|------|-------|------|------|------|------|
| 7.79  | 8.61  | 8.09  | 8.18 | 8.83  | 6.71 | 7.22 | 7.04 | 4.26 |
| 7.58  | 8.83  | 7.56  | 7.58 | 9     | 6.44 | 6.66 | 9.05 | 5.36 |
| 7.76  | 9.68  | 7.61  | 7.46 | 8.91  | 6.31 | 6.88 | 8.22 | 4.89 |
| 7.47  | 9.02  | 7.95  | 8.08 | 10.47 | 5.22 | 6.52 | 8.59 | 6.45 |
| 8.72  | 9.44  | 8.02  | 7.2  | 9.38  | 7.68 | 8.11 | 8.74 | 3.01 |
| 7.57  | 8.16  | 7.84  | 7.29 | 8.5   | 5.54 | 6.87 | 8.28 | 3.81 |
| 7.5   | 8.37  | 7.66  | 7.41 | 8.24  | 5.17 | 7.02 | 8.14 | 4.38 |
| 7.53  | 7.88  | 9.4   | 7.72 | 9.15  | 2.98 | 6.04 | 7.71 | 5.64 |
| 6.3   | 7.92  | 7.07  | 7.52 | 7.94  | 3.37 | 6.5  | 7.11 | 5.45 |
| 7.19  | 7.64  | 6.66  | 5.95 | 7.68  | 4.82 | 5.98 | 7.03 | 3.82 |
| 5.38  | 7.87  | 7.19  | 7.35 | 8.81  | 3.7  | 6.16 | 7.13 | 5.19 |
| 5.77  | 7.45  | 6.64  | 7    | 9.78  | 2.68 | 6.49 | 7.44 | 5.33 |
| 6.62  | 8.25  | 8.55  | 6.67 | 9.37  | 5.47 | 6.35 | 7.21 | 3.88 |
| 7.42  | 8.55  | 8.23  | 7    | 9.22  | 5.7  | 7.16 | 7.53 | 4.53 |
| 8.87  | 7.83  | 10.61 | 7.6  | 10.37 | 4.35 | 5.94 | 6.09 | 5.67 |
| 7.32  | 7.67  | 8.54  | 7.05 | 8.4   | 5.7  | 7.19 | 7.7  | 6.3  |
| 7.98  | 8.96  | 8.4   | 7.33 | 9.34  | 6.42 | 6.81 | 7.44 | 4.87 |
| 7.69  | 8.68  | 9.14  | 8.02 | 9.97  | 6.01 | 6.67 | 7.84 | 4.76 |
| 7.02  | 7.24  | 10.42 | 7.98 | 8.91  | 2.7  | 7.68 | 7.6  | 6.67 |
| 7.61  | 8.36  | 9.3   | 8.52 | 9.28  | 3.77 | 7.39 | 8.29 | 5.95 |
| 7.61  | 7.99  | 9.33  | 8.82 | 10.7  | 4.99 | 7.82 | 8.05 | 6.63 |
| 7.59  | 9     | 9.04  | 7.81 | 10.61 | 3.96 | 6.28 | 7.63 | 5.51 |
| 8.56  | 9.97  | 9.25  | 7.83 | 10.81 | 3.01 | 6.43 | 7.55 | 5.66 |
| 7.8   | 8.27  | 8.75  | 7.88 | 11.04 | 4.35 | 6.81 | 7.29 | 4.89 |
| 8.49  | 10.02 | 10.23 | 7.8  | 8.56  | 3.6  | 6.04 | 6.69 | 4.43 |
| 5.83  | 7.98  | 8.88  | 6.67 | 8.33  | 2.94 | 5.74 | 7.52 | 4.3  |
| 5.56  | 8.46  | 9.05  | 6.35 | 8.54  | 3.84 | 5.91 | 7.03 | 4.11 |
| 7.45  | 8.29  | 8.47  | 7.08 | 9.23  | 6.09 | 6.79 | 7.74 | 4    |
| 8.77  | 9.35  | 8.91  | 5.91 | 8.43  | 6.71 | 6.73 | 6.82 | 5.28 |
| 8.17  | 8.5   | 8.28  | 6.94 | 8.9   | 6.71 | 6.94 | 7.26 | 4.68 |
| 8.89  | 9.57  | 8.77  | 6.78 | 8.47  | 6.59 | 6.3  | 7.17 | 4.2  |
| 8.76  | 8.95  | 8.88  | 6.77 | 8.96  | 7.31 | 6.77 | 7.48 | 5.41 |
| 7.52  | 7.88  | 6.47  | 8.12 | 8.78  | 5.82 | 8.5  | 7.17 | 6.82 |
| 6.19  | 7.27  | 8.33  | 7.51 | 9.45  | 2.64 | 6.47 | 8.62 | 6.25 |
| 5.9   | 7.89  | 8.64  | 7.02 | 8.81  | 2.93 | 6.25 | 8.67 | 6    |
| 6.56  | 7.34  | 8.4   | 7.23 | 9.62  | 3.28 | 6.7  | 8    | 6.25 |
| 5.57  | 4.53  | 6.77  | 8.27 | 7     | 2.45 | 6.79 | 5.3  | 5.8  |
| 4.31  | 4.99  | 5.53  | 7.58 | 7.02  | 2.4  | 6.56 | 6    | 4.73 |
| 5.17  | 5.22  | 4.17  | 8.11 | 7.3   | 4.07 | 6.91 | 5.61 | 4.07 |
| 5.47  | 4.6   | 4.99  | 8.3  | 7.77  | 4.2  | 7.03 | 5.07 | 3.99 |
| 7.38  | 8.15  | 7.51  | 6.39 | 8.01  | 5.16 | 6.66 | 7.48 | 4.68 |
| 7.19  | 8.38  | 7.19  | 6.15 | 8.04  | 5.85 | 6.48 | 7.67 | 4.48 |
| 7.37  | 8.58  | 7.67  | 6.45 | 7.88  | 5.26 | 6.54 | 7.54 | 4.22 |
| 7.12  | 8.72  | 7.44  | 6.21 | 7.33  | 3.9  | 5.88 | 7.35 | 4.06 |
| 7.95  | 10.5  | 11.13 | 5.67 | 8.03  | 2.86 | 4.45 | 4.86 | 5.86 |
| 7.66  | 8.55  | 8.42  | 6.5  | 9.53  | 4.71 | 5.96 | 6.27 | 4.48 |
| 7.05  | 8.03  | 8.29  | 6.66 | 8.71  | 5.13 | 5.98 | 7.03 | 4.81 |
| 6.56  | 7.63  | 7.67  | 6.96 | 10.18 | 3.39 | 6.36 | 6.86 | 3.62 |
| 5.22  | 9.81  | 9.27  | 8.01 | 9.23  | 4.54 | 6.96 | 6.76 | 4.88 |
| 5.14  | 9.46  | 9.49  | 7.87 | 7.76  | 4.47 | 6.83 | 7.35 | 5.5  |
| 5.67  | 9.47  | 10.14 | 8.14 | 7.65  | 4.2  | 7.02 | 7.24 | 4.58 |

<https://mc.manuscriptcentral.com/gut>

1  
2  
3  
4  
5  
6  
7  
8  
9  
10  
11  
12  
13  
14  
15  
16  
17  
18  
19  
20  
21  
22  
23  
24  
25  
26  
27  
28  
29  
30  
31  
32  
33  
34  
35  
36  
37  
38  
39  
40  
41  
42  
43  
44  
45  
46  
47  
48  
49  
50  
51  
52  
53  
54  
55  
56  
57  
58  
59  
60

|       |       |       |       |       |      |      |      |      |
|-------|-------|-------|-------|-------|------|------|------|------|
| 5.66  | 9.1   | 9.53  | 8.28  | 9.1   | 4.4  | 7.12 | 7.27 | 5.44 |
| 7.86  | 8.58  | 8.87  | 6.1   | 8.33  | 5.7  | 5.94 | 7.41 | 3.94 |
| 7.72  | 8.06  | 8.76  | 6.96  | 8.28  | 5.94 | 6.4  | 7.66 | 5.36 |
| 8.09  | 7.7   | 8.37  | 6.51  | 8.23  | 5.79 | 6.24 | 7.56 | 4.71 |
| 7.87  | 8.2   | 8.64  | 7.58  | 9.39  | 5.72 | 6.67 | 7.73 | 3.55 |
| 8.69  | 8.29  | 8.99  | 7.6   | 8.51  | 3.93 | 7.57 | 6.72 | 6.44 |
| 8.26  | 8.88  | 9.49  | 7.38  | 9.19  | 3.83 | 6.33 | 7.49 | 5.42 |
| 7.73  | 9.18  | 9.9   | 5.51  | 7.21  | 2.7  | 5.15 | 6.61 | 4.67 |
| 8.2   | 8.79  | 9.81  | 8.48  | 10.5  | 2.76 | 5.86 | 7.44 | 5.44 |
| 4.75  | 9.14  | 9.12  | 7.59  | 6.94  | 1.9  | 6.12 | 7.34 | 4.04 |
| 6.37  | 8.6   | 9.01  | 7.62  | 8.29  | 3.71 | 6.65 | 6.56 | 4.71 |
| 6.29  | 9.03  | 9.32  | 7.29  | 6.96  | 3.52 | 6.01 | 6.9  | 3.82 |
| 5.73  | 9.02  | 8.93  | 8.13  | 9.34  | 3.88 | 6.59 | 6.42 | 4.44 |
| 10.64 | 13.18 | 11.34 | 6.15  | 7.96  | 7.15 | 7.47 | 6.74 | 6.15 |
| 8.5   | 10.18 | 9.59  | 7.87  | 9.07  | 5.11 | 7.11 | 7.46 | 5.43 |
| 8.05  | 8.69  | 8.68  | 7.94  | 8.7   | 6.12 | 7.26 | 7.46 | 4.45 |
| 10.25 | 11.24 | 8.57  | 8.52  | 10.23 | 7.45 | 8.24 | 9.03 | 1.24 |
| 9.92  | 10.97 | 9.04  | 8.25  | 9.79  | 7.46 | 8.03 | 9.05 | 2.77 |
| 7.55  | 8.66  | 8.89  | 9.8   | 7.26  | 5.27 | 5.78 | 7.72 | 4.31 |
| 7.34  | 8.82  | 8.68  | 10.05 | 7.27  | 5.43 | 6.02 | 7.74 | 2.72 |
| 7.78  | 8.65  | 8.95  | 9.35  | 7.92  | 5.78 | 6.65 | 7.51 | 4.32 |
| 7.48  | 6.81  | 8.68  | 7.57  | 9.45  | 2.9  | 6.74 | 8.15 | 5.4  |
| 9.24  | 7.03  | 8.58  | 8.22  | 10.06 | 5.03 | 6.41 | 8.03 | 5.49 |
| 7.79  | 6.88  | 8.53  | 8.21  | 10.42 | 5.86 | 7.16 | 8.57 | 5.51 |
| 7.86  | 7.81  | 7.9   | 7.84  | 9.26  | 4.22 | 7.19 | 7.71 | 5.28 |
| 7.7   | 8.41  | 8.25  | 7.33  | 8.83  | 3.95 | 7.16 | 8.13 | 6.15 |
| 7.87  | 8.36  | 8.23  | 7.67  | 9.34  | 4.01 | 6.88 | 7.64 | 6.28 |
| 7.52  | 9.17  | 9.01  | 7.1   | 8.42  | 5.82 | 7.03 | 7.62 | 3.68 |
| 7.22  | 8.76  | 8.89  | 7.17  | 8.21  | 6.17 | 6.85 | 7.8  | 3.89 |
| 7.37  | 9.35  | 9.07  | 7.41  | 8.94  | 6.4  | 7.22 | 7.63 | 4.32 |
| 7.39  | 9.4   | 8.95  | 7.97  | 9.5   | 7.08 | 7.25 | 8.35 | 4.7  |
| 7.52  | 9.37  | 9.32  | 7.56  | 9.26  | 6.48 | 6.93 | 7.93 | 4.66 |
| 7.83  | 9.27  | 9.36  | 7.07  | 8.9   | 6.82 | 6.94 | 8.17 | 4.31 |
| 7.58  | 7.65  | 7.81  | 7.01  | 8.94  | 6.34 | 7.09 | 7.52 | 4.64 |
| 7.95  | 7.85  | 7.76  | 6.7   | 8.86  | 6.4  | 6.98 | 7.74 | 4.34 |
| 7.58  | 7.7   | 7.51  | 6.97  | 9.03  | 6.59 | 7.29 | 7.8  | 5.05 |
| 7.72  | 8.32  | 7.54  | 7.16  | 8.78  | 6.52 | 7.51 | 7.76 | 4.76 |
| 7.72  | 8.32  | 7.54  | 7.16  | 8.78  | 6.52 | 7.51 | 7.76 | 4.76 |
| 8.22  | 8.88  | 8.17  | 7.43  | 9.74  | 5.82 | 6.9  | 7.74 | 4.15 |
| 7.89  | 8.33  | 7.63  | 8     | 10.66 | 6.81 | 7.2  | 8.16 | 4.26 |
| 7.76  | 8.56  | 7.44  | 7.26  | 9.41  | 5.73 | 6.97 | 7.93 | 4.21 |
| 7.99  | 8.69  | 7.49  | 7.73  | 8.76  | 7.2  | 7.92 | 7.89 | 5.26 |
| 7.82  | 8.97  | 7.77  | 7.88  | 9.32  | 6.55 | 7.28 | 8    | 4.2  |
| 7.31  | 9.82  | 7.84  | 7.71  | 9.02  | 5.92 | 6.91 | 7.74 | 4.47 |
| 7.88  | 8.93  | 7.61  | 8.32  | 10.12 | 7.23 | 7.33 | 7.77 | 3.93 |
| 5.53  | 8.37  | 9.89  | 7.07  | 8.24  | 3.19 | 5.81 | 6.28 | 4.31 |
| 6.34  | 8.52  | 9.87  | 5.36  | 7.73  | 2.4  | 5.36 | 6.34 | 4.47 |
| 6.19  | 8.18  | 10.33 | 7.32  | 8.56  | 3.1  | 6.42 | 5.73 | 5.42 |
| 7.81  | 7.75  | 7.17  | 7.6   | 9.09  | 7.65 | 7.91 | 7.8  | 5.01 |
| 7.93  | 7.92  | 7.9   | 7.67  | 10.23 | 7.57 | 7.47 | 7.83 | 5.02 |
| 8.15  | 7.72  | 7.36  | 7.56  | 10    | 7.59 | 7.4  | 7.76 | 3.63 |
| 7.81  | 7.73  | 8.35  | 7.08  | 8.89  | 7.3  | 7.12 | 7.54 | 4.1  |

<https://mc.manuscriptcentral.com/gut>

1  
2  
3  
4  
5  
6  
7  
8  
9  
10  
11  
12  
13  
14  
15  
16  
17  
18  
19  
20  
21  
22  
23  
24  
25  
26  
27  
28  
29  
30  
31  
32  
33  
34  
35  
36  
37  
38  
39  
40  
41  
42  
43  
44  
45  
46  
47  
48  
49  
50  
51  
52  
53  
54  
55  
56  
57  
58  
59  
60

|       |       |       |      |       |      |      |      |      |
|-------|-------|-------|------|-------|------|------|------|------|
| 7.6   | 7.51  | 8.13  | 7.11 | 8.89  | 6.99 | 7.05 | 7.64 | 4.21 |
| 7.8   | 8.69  | 8.75  | 7.54 | 9.73  | 7.57 | 7.46 | 8.01 | 4.42 |
| 7.46  | 8.82  | 6.84  | 7.98 | 9.22  | 4.46 | 7.83 | 7.44 | 6.27 |
| 8.51  | 10.01 | 6.27  | 7.54 | 9.85  | 3.66 | 7.43 | 7.08 | 5.4  |
| 8.4   | 9.55  | 5.44  | 8.37 | 10.67 | 4.3  | 7.35 | 6.93 | 5.44 |
| 6.34  | 6.93  | 9.15  | 7.93 | 8.65  | 3.58 | 7.17 | 6.11 | 5.93 |
| 8.74  | 6.45  | 7.89  | 6.01 | 7.48  | 3.8  | 5.78 | 7.38 | 4.91 |
| 8.27  | 7.25  | 8.13  | 6.75 | 8.01  | 2.34 | 6.13 | 7.56 | 4.8  |
| 9.25  | 7.78  | 10.89 | 7.3  | 10.17 | 4.08 | 5.3  | 6.82 | 6.58 |
| 7.77  | 9.57  | 9.67  | 7.13 | 8.14  | 2.79 | 6.7  | 7.27 | 6.25 |
| 7.87  | 9.44  | 9.04  | 6.87 | 8.25  | 2.08 | 5.81 | 6.47 | 4.49 |
| 7.56  | 8.97  | 8.2   | 6.41 | 7.93  | 5.65 | 6.75 | 7.18 | 2.48 |
| 8.47  | 8.8   | 11.12 | 6.58 | 9.08  | 3.26 | 6.17 | 5.26 | 5.07 |
| 9.56  | 8.93  | 8     | 6.96 | 9.74  | 7.74 | 8.1  | 9.38 | 0.79 |
| 6.58  | 5.53  | 7.23  | 8.6  | 7.27  | 2.95 | 5.16 | 6.88 | 3.53 |
| 5.94  | 5.39  | 7.33  | 8.57 | 6.59  | 1.42 | 4.96 | 6.94 | 4.42 |
| 6.44  | 5.69  | 7.19  | 8.19 | 8.08  | 3.33 | 5.38 | 6.72 | 3.52 |
| 4.56  | 6.63  | 5.37  | 8.51 | 7.91  | 3.14 | 6.88 | 6.53 | 4.96 |
| 7.21  | 7.64  | 5.96  | 7.17 | 7.92  | 5.26 | 6.85 | 6.7  | 4.23 |
| 6.59  | 7.36  | 5.42  | 8.09 | 8.43  | 4.04 | 6.9  | 6.95 | 4.79 |
| 10.62 | 11.5  | 14.2  | 5.16 | 8.62  | 6.16 | 7.75 | 5.16 | 5.16 |
| 7.3   | 10.78 | 8.97  | 6.29 | 7.24  | 3.3  | 5.78 | 7.68 | 4.04 |
| 7.32  | 10.28 | 8.65  | 7.69 | 8.5   | 4.12 | 6.82 | 7.07 | 4.62 |
| 8.45  | 8.99  | 9.59  | 6.22 | 9.61  | 3.77 | 5.18 | 6.67 | 5.43 |
| 8.46  | 8.41  | 9.73  | 6.49 | 10.19 | 5.08 | 6.04 | 6.84 | 6.19 |
| 7.31  | 7.53  | 8.13  | 7.17 | 9.04  | 3.54 | 6.32 | 7.45 | 5.71 |
| 8.78  | 8.63  | 8.38  | 6.35 | 9.12  | 8    | 7.21 | 8.02 | 3    |
| 9     | 8.83  | 8.57  | 6.67 | 9.32  | 8.14 | 7.8  | 8.16 | 2.44 |
| 8.23  | 8.77  | 8.09  | 6.41 | 8.81  | 8.28 | 7.38 | 7.65 | 2.77 |
| 5.01  | 7.28  | 5.82  | 6.79 | 7.9   | 4.4  | 6.48 | 7.04 | 5.05 |
| 5.35  | 6.02  | 5.74  | 6.97 | 9.62  | 4.18 | 6.18 | 6.97 | 4.55 |
| 6.11  | 7     | 6.95  | 6.36 | 9.65  | 4.57 | 5.86 | 6.38 | 4.02 |
| 5.2   | 5.8   | 5.06  | 6.71 | 10.07 | 3.33 | 6.33 | 7.55 | 4.24 |
| 8.04  | 8.08  | 8.09  | 6.41 | 8.25  | 5.66 | 7.27 | 7.08 | 0.45 |
| 7.69  | 7.69  | 7.95  | 5.54 | 8.22  | 6.4  | 6.74 | 7.29 | 0.25 |
| 7.73  | 7.5   | 8.16  | 5.65 | 8     | 6.39 | 6.49 | 6.82 | 0.93 |
| 8.61  | 9.52  | 7.52  | 7.45 | 9.07  | 6    | 7.41 | 7.97 | 0    |
| 7.86  | 7.84  | 7.4   | 6.24 | 8.19  | 6.86 | 7.14 | 7.4  | 2.92 |
| 7.59  | 7.57  | 7.29  | 5.96 | 8.09  | 6.42 | 7.33 | 6.74 | 1.1  |
| 7.51  | 7.42  | 7.42  | 6.42 | 8.06  | 6.33 | 7.14 | 7.35 | 1.31 |
| 8.5   | 11.79 | 5.87  | 8.73 | 8.95  | 4.41 | 7.54 | 8    | 2.41 |
| 8.59  | 8.71  | 8.62  | 6.67 | 8.97  | 7.18 | 7.78 | 7.91 | 1.06 |
| 9.07  | 9.13  | 8.73  | 6.88 | 9.23  | 7.81 | 8.23 | 8.38 | 0.33 |
| 7.95  | 8.01  | 8.63  | 6.29 | 8.37  | 6.48 | 6.62 | 7.5  | 2.45 |
| 8.59  | 8.73  | 8.43  | 6.74 | 8.95  | 6.92 | 7.95 | 7.96 | 2.33 |
| 8.18  | 7.96  | 8.07  | 7.16 | 8.59  | 6    | 7.41 | 7.45 | 4.62 |
| 8.62  | 8.02  | 8.63  | 7.87 | 9.2   | 6.86 | 7.4  | 7.98 | 2.62 |
| 8.64  | 8.05  | 7.43  | 8.18 | 9.3   | 7.08 | 7.32 | 8.21 | 2.71 |
| 8.67  | 9.25  | 7.93  | 8.59 | 9.4   | 6.65 | 8.26 | 8.41 | 0.9  |
| 6.43  | 7     | 6.9   | 6.02 | 7.78  | 5.79 | 6.93 | 7.36 | 2.5  |
| 6.25  | 6.37  | 7.06  | 6.55 | 7.51  | 5.85 | 7    | 7.42 | 2.55 |
| 6.89  | 6.82  | 7.56  | 6.54 | 7.98  | 5.82 | 7.2  | 7.33 | 4.36 |

<https://mc.manuscriptcentral.com/gut>

1  
2  
3  
4  
5  
6  
7  
8  
9  
10  
11  
12  
13  
14  
15  
16  
17  
18  
19  
20  
21  
22  
23  
24  
25  
26  
27  
28  
29  
30  
31  
32  
33  
34  
35  
36  
37  
38  
39  
40  
41  
42  
43  
44  
45  
46  
47  
48  
49  
50  
51  
52  
53  
54  
55  
56  
57  
58  
59  
60

|       |       |       |      |       |      |      |      |      |
|-------|-------|-------|------|-------|------|------|------|------|
| 6.87  | 7.11  | 7.4   | 6.93 | 8.18  | 6.25 | 6.97 | 7.39 | 3.59 |
| 7.64  | 7.19  | 7.16  | 6.91 | 8.44  | 4.91 | 6.98 | 7.75 | 5.52 |
| 7.98  | 7.47  | 7.7   | 6.79 | 9.42  | 4.9  | 6.96 | 7.52 | 5.7  |
| 8.03  | 6.52  | 7.48  | 5.83 | 8     | 4.83 | 6.36 | 7.46 | 4.65 |
| 7.95  | 6.58  | 7.67  | 6.19 | 8     | 5.08 | 6.26 | 7.52 | 4.48 |
| 8     | 9.05  | 8.7   | 7.8  | 9.26  | 6.19 | 7.93 | 7.77 | 5.26 |
| 7.03  | 7.85  | 9.29  | 7.92 | 9.94  | 4.54 | 7.13 | 6.4  | 5.97 |
| 6.76  | 8.13  | 8.34  | 7.95 | 9.54  | 4.73 | 6.81 | 6.95 | 4.56 |
| 7.79  | 6.99  | 9.18  | 9.28 | 12.46 | 5.55 | 7.37 | 6.47 | 5.91 |
| 6.81  | 9.55  | 9.81  | 6.74 | 8.44  | 5.29 | 6.79 | 8.8  | 6.55 |
| 10.9  | 9.23  | 9.31  | 7.96 | 9.61  | 5.66 | 7.2  | 8.49 | 5.81 |
| 7.53  | 9.4   | 9.53  | 8.13 | 9.72  | 4.47 | 6.63 | 8.51 | 5.63 |
| 7.51  | 9.23  | 9.63  | 7.9  | 10.52 | 4.46 | 6.54 | 8.66 | 5.9  |
| 7.19  | 8.11  | 9.16  | 7.14 | 8.26  | 5.74 | 7.22 | 7.22 | 4.38 |
| 7.08  | 8.47  | 9.83  | 6.98 | 8.87  | 3.76 | 6.69 | 7.19 | 4.83 |
| 7.35  | 7.49  | 9.69  | 7.4  | 11.06 | 6.08 | 6.98 | 6.9  | 5.47 |
| 8.26  | 6.04  | 7.44  | 8.09 | 8.86  | 4.52 | 7.89 | 6.71 | 7.14 |
| 8.03  | 7.5   | 8.71  | 6.73 | 9.29  | 3.47 | 6.5  | 6.99 | 4.99 |
| 7.94  | 6.33  | 7.82  | 7.97 | 10.8  | 3.52 | 7    | 7.29 | 5.38 |
| 12.93 | 7.7   | 8.63  | 6.71 | 9.39  | 4.88 | 6.77 | 6.32 | 4.93 |
| 3.63  | 7.59  | 8.49  | 6.05 | 7.54  | 2.71 | 5.61 | 7.17 | 4.97 |
| 2.65  | 8.86  | 9.13  | 6.03 | 6.99  | 1.8  | 4.43 | 6.75 | 3.8  |
| 7.86  | 8.66  | 7.95  | 7.06 | 9.15  | 5.19 | 7.15 | 7.52 | 5.5  |
| 8.33  | 9.77  | 7.96  | 7.14 | 9.12  | 4.84 | 6.71 | 7.53 | 5.02 |
| 8.1   | 8.98  | 8.01  | 7.47 | 12.05 | 5.15 | 6.47 | 5.96 | 5.15 |
| 3.95  | 7.23  | 6.49  | 7.59 | 7.9   | 2.36 | 6.96 | 5.65 | 4.95 |
| 6.46  | 7.5   | 6.6   | 7.41 | 9.48  | 4.96 | 6.11 | 7.49 | 4.38 |
| 4.76  | 7.82  | 7.22  | 7.06 | 7.17  | 3.22 | 5.55 | 7.22 | 3.46 |
| 3.48  | 7.42  | 6.48  | 7.48 | 10.77 | 6.22 | 7.11 | 6.99 | 2.9  |
| 7.62  | 7.01  | 7.51  | 5.08 | 8.25  | 8.75 | 6.85 | 7.22 | 1.76 |
| 7.58  | 7.45  | 7.87  | 5.63 | 8.28  | 8.65 | 6.5  | 7.27 | 0.72 |
| 7.65  | 7.61  | 7.67  | 6.28 | 8.42  | 8.86 | 6.93 | 7.57 | 2.47 |
| 7.53  | 7.37  | 7.66  | 5.54 | 8.18  | 8.83 | 7.02 | 7.11 | 0.96 |
| 6.65  | 6.79  | 7.5   | 6.39 | 7.16  | 5.85 | 5.9  | 6.34 | 3.61 |
| 7.3   | 7.67  | 7.77  | 6.54 | 8.58  | 6.51 | 6.54 | 6.15 | 3.47 |
| 7     | 7.37  | 7.17  | 6.64 | 8.61  | 6.69 | 6.12 | 6.43 | 3.35 |
| 6.88  | 6.97  | 6.9   | 6.75 | 8.54  | 6.09 | 6.24 | 6.29 | 2.97 |
| 4.26  | 4.81  | 3.52  | 7.22 | 8.43  | 3.68 | 8.62 | 6.21 | 6.19 |
| 6.67  | 9.33  | 8.87  | 7.08 | 9.08  | 3.46 | 6.78 | 7.27 | 4.78 |
| 11.47 | 6.61  | 9.16  | 8.19 | 8.47  | 2.42 | 6.81 | 7.31 | 5.17 |
| 14    | 4.82  | 11.57 | 7.59 | 9.26  | 2.23 | 6.04 | 5.55 | 6.88 |
| 7.25  | 9.38  | 8.59  | 6.46 | 8.02  | 4.98 | 6.47 | 7.09 | 3.95 |
| 12.35 | 6.51  | 11.15 | 7.32 | 10    | 4.51 | 4.51 | 6.83 | 5.51 |
| 5.26  | 7.07  | 8.07  | 6.87 | 9.32  | 4.96 | 6.26 | 6.34 | 5.73 |
| 5.26  | 5.72  | 7.92  | 7.13 | 9.72  | 3.64 | 5.91 | 6.29 | 5.58 |
| 6.89  | 10.77 | 9.28  | 3    | 3.85  | 2.27 | 3.49 | 6.3  | 3.68 |
| 7.39  | 9.44  | 8.81  | 7.48 | 9.26  | 4.38 | 6.38 | 6.39 | 3.15 |
| 6.47  | 9.23  | 8.83  | 7.29 | 9.13  | 4.18 | 5.92 | 6.3  | 4.52 |
| 7.37  | 8.69  | 8.6   | 7.58 | 9.68  | 5.87 | 6.56 | 6.63 | 4.16 |
| 5.72  | 6.54  | 6.48  | 7.01 | 7.52  | 2.57 | 6.49 | 5.78 | 5.62 |
| 6.76  | 6.66  | 6.72  | 6.87 | 8.84  | 5.34 | 6.11 | 6.41 | 4.23 |
| 6.83  | 6.74  | 6.79  | 6.48 | 8.68  | 5.12 | 6.29 | 6.4  | 3.92 |

<https://mc.manuscriptcentral.com/gut>



1  
2  
3  
4  
5  
6  
7  
8  
9  
10  
11  
12  
13  
14  
15  
16  
17  
18  
19  
20  
21  
22  
23  
24  
25  
26  
27  
28  
29  
30  
31  
32  
33  
34  
35  
36  
37  
38  
39  
40  
41  
42  
43  
44  
45  
46  
47  
48  
49  
50  
51  
52  
53  
54  
55  
56  
57  
58  
59  
60

|      |       |       |      |       |      |      |      |      |
|------|-------|-------|------|-------|------|------|------|------|
| 6.96 | 5.83  | 6.7   | 7.11 | 11.18 | 3.96 | 5.25 | 5.31 | 3.6  |
| 7.17 | 8.39  | 7.25  | 5.19 | 8.89  | 4.27 | 5.27 | 6.39 | 4.8  |
| 7.64 | 10.54 | 7.23  | 3.39 | 7.39  | 4.67 | 5.05 | 6.49 | 2.91 |
| 7.7  | 10.99 | 7.12  | 5.35 | 7.83  | 4.07 | 5.29 | 6.37 | 3.29 |
| 8.74 | 8.54  | 8.09  | 5.25 | 8.7   | 6.55 | 7.23 | 7.05 | 3.14 |
| 3.02 | 6.35  | 6.51  | 7.31 | 7.06  | 2.15 | 5.77 | 7.13 | 4.21 |
| 3.15 | 5.93  | 6.74  | 6.6  | 6.34  | 2.53 | 4.8  | 5.75 | 2.07 |
| 1.94 | 6.13  | 6.92  | 6.44 | 6.08  | 2.16 | 4.84 | 5.78 | 2.52 |
| 8.21 | 8.32  | 7.66  | 6.29 | 8.26  | 6.61 | 6.93 | 7.93 | 1.86 |
| 7.48 | 7.58  | 7.32  | 6.75 | 8.78  | 6.11 | 6.92 | 7.12 | 3.36 |
| 6.22 | 7.81  | 7.76  | 7.37 | 8.15  | 3.74 | 6.94 | 5.88 | 4.7  |
| 7.72 | 7.99  | 7.86  | 6.47 | 9.18  | 5.28 | 6.5  | 6.32 | 3.47 |
| 7.53 | 8.36  | 8.61  | 7.27 | 9.79  | 2.89 | 6.19 | 5.92 | 3.89 |
| 7.14 | 7.44  | 7.28  | 7.55 | 9.5   | 4.71 | 7.04 | 6.48 | 3.13 |
| 7.45 | 8.38  | 11.18 | 6.13 | 9.1   | 2.54 | 4.87 | 5.13 | 4.54 |
| 6.92 | 9.12  | 8.65  | 7.28 | 8.08  | 4.39 | 6.26 | 6.31 | 3.8  |
| 6.75 | 7.64  | 7.45  | 7.15 | 8.94  | 5.71 | 6.72 | 6.49 | 2.56 |
| 6.73 | 9.09  | 8.93  | 7.27 | 7.92  | 3.34 | 6.2  | 5.73 | 3.34 |

1  
2  
3  
4  
5  
6  
7  
8  
9  
10  
11  
12  
13  
14  
15  
16  
17  
18  
19  
20  
21  
22  
23  
24  
25  
26  
27  
28  
29  
30  
31  
32  
33  
34  
35  
36  
37  
38  
39  
40  
41  
42  
43  
44  
45  
46  
47  
48  
49  
50  
51  
52  
53  
54  
55  
56  
57  
58  
59  
60

| FMOD  | FN1   | FOX2 | FOX4 | FRAS1 | FREM1 | FREM2 | FST  | FSTL1 |
|-------|-------|------|------|-------|-------|-------|------|-------|
| 8.69  | 10.11 | 6.69 | 7.25 | 7.5   | 6.82  | 6.44  | 6.88 | 10.07 |
| 8.53  | 9.2   | 6.05 | 7.3  | 6.69  | 6.01  | 5.74  | 6.36 | 10.65 |
| 8.18  | 8.72  | 6.13 | 7.24 | 6.64  | 6.31  | 6.15  | 7.03 | 10.3  |
| 9.58  | 10.88 | 4.82 | 8.12 | 5.91  | 4.99  | 1.76  | 6.13 | 12.17 |
| 8.62  | 1.01  | 6.87 | 7.71 | 7.97  | 8.59  | 8.16  | 8.04 | 7.95  |
| 9.71  | 11.12 | 5.35 | 7    | 7.27  | 6.68  | 6.79  | 6.5  | 10.52 |
| 9.5   | 11.09 | 5.53 | 7.28 | 7.43  | 6.62  | 6.28  | 6.59 | 10.63 |
| 9.64  | 11.62 | 3.85 | 8.24 | 7.41  | 3.72  | 5.68  | 6.46 | 12.13 |
| 9.49  | 12.27 | 5.07 | 7.71 | 6.45  | 3.95  | 3.54  | 4.45 | 11.21 |
| 9.05  | 10.85 | 5.77 | 7.25 | 6.57  | 6.18  | 5.69  | 5.84 | 10.34 |
| 9.26  | 10.93 | 3.19 | 7.45 | 6.4   | 5.24  | 3.38  | 2.96 | 10.54 |
| 9.18  | 11.76 | 4.38 | 7.76 | 3.85  | 4.14  | 1.68  | 3.68 | 11.27 |
| 8.56  | 9.45  | 5.94 | 8.07 | 6.17  | 8.16  | 6.61  | 6.48 | 9.81  |
| 9.29  | 11.27 | 6.36 | 7.65 | 6.67  | 7.37  | 6.64  | 7.05 | 10.89 |
| 8.8   | 10.36 | 5.23 | 9.66 | 7.38  | 6.94  | 5.47  | 6.02 | 12.06 |
| 8.81  | 11.98 | 6.7  | 7.19 | 7.56  | 7.19  | 6.26  | 6.26 | 10.6  |
| 9.14  | 11.22 | 6.65 | 7.81 | 8.02  | 7.44  | 6.15  | 7.02 | 10.92 |
| 9.07  | 12.58 | 6.08 | 7.22 | 8.22  | 7.85  | 6.35  | 6.81 | 11.44 |
| 8.94  | 9.64  | 4.15 | 8.8  | 7.33  | 4.7   | 0     | 6.53 | 11.49 |
| 9.43  | 10.56 | 0.31 | 7.58 | 8.01  | 4.44  | 2.89  | 5.09 | 11    |
| 9.28  | 10.87 | 3.96 | 8.02 | 7.69  | 5.86  | 2.5   | 6.28 | 11.34 |
| 10.36 | 11.57 | 4.15 | 8.46 | 8.37  | 6.86  | 6.73  | 6.13 | 12.23 |
| 10.85 | 10.77 | 3.66 | 8.52 | 8.7   | 7.23  | 7.22  | 6.45 | 11.67 |
| 11.44 | 12.06 | 3.59 | 8.47 | 7.96  | 7.43  | 7.21  | 5.42 | 12.27 |
| 9.12  | 13.08 | 2.01 | 6.13 | 10.62 | 5.82  | 6.87  | 3.01 | 9.67  |
| 7.35  | 7.82  | 2.45 | 6.68 | 4.22  | 3.94  | 2.13  | 3.71 | 9.65  |
| 7.38  | 7.9   | 3.33 | 7.12 | 5.91  | 4.43  | 2.11  | 2.52 | 9.58  |
| 8.55  | 8     | 5.85 | 7.35 | 6.67  | 6.11  | 5.53  | 6.31 | 9.62  |
| 7.74  | 9.28  | 6.7  | 7.36 | 8.33  | 6.2   | 5.95  | 6.22 | 9.41  |
| 8.93  | 8.44  | 6.59 | 7.53 | 7.92  | 6.64  | 6.08  | 6.61 | 10.01 |
| 9.03  | 8.97  | 6.57 | 7.77 | 8.29  | 5.95  | 5.87  | 6.3  | 9.44  |
| 8.69  | 8.57  | 7.45 | 8.03 | 8.13  | 7.08  | 6.71  | 7.22 | 10.07 |
| 8.51  | 6.97  | 5.87 | 7.2  | 6.92  | 7.05  | 6.71  | 6.54 | 8.88  |
| 10.72 | 12.46 | 5.34 | 6.89 | 6.23  | 6.61  | 3.64  | 6.85 | 12.23 |
| 10.07 | 11.12 | 3.2  | 6.99 | 6.47  | 4.13  | 3.7   | 7.29 | 11.47 |
| 10.53 | 11.53 | 5.06 | 7.49 | 6.62  | 6.33  | 3.28  | 7.04 | 12.12 |
| 7.98  | 8.92  | 2.77 | 7.49 | 5.25  | 2.77  | 1.45  | 3.77 | 9.85  |
| 8.34  | 9.7   | 2.21 | 7.01 | 4.57  | 3.57  | 1.73  | 3.99 | 10.18 |
| 8.49  | 9.78  | 3.54 | 7.13 | 5.27  | 5.12  | 3.83  | 4.76 | 10.45 |
| 8.2   | 10.37 | 3.2  | 7    | 5.44  | 5.42  | 2.55  | 4.95 | 10.05 |
| 8.78  | 10.77 | 5.87 | 7.09 | 6.92  | 6.61  | 7.34  | 6.67 | 9.84  |
| 9.33  | 10.64 | 5.87 | 7.39 | 6.78  | 6.32  | 7.9   | 6.32 | 9.89  |
| 8.7   | 9.76  | 5.89 | 7.12 | 6.66  | 6.22  | 7.95  | 5.92 | 9.8   |
| 9.21  | 10.63 | 4.94 | 7.38 | 6.8   | 5.84  | 8     | 6.12 | 10.13 |
| 8.32  | 8.53  | 5.86 | 9.37 | 8.61  | 4.86  | 5.18  | 6.18 | 10.37 |
| 10.64 | 8.86  | 1.9  | 8.08 | 8.24  | 5.52  | 5.02  | 4.64 | 10.32 |
| 9.89  | 10.22 | 3.7  | 7.82 | 8.27  | 5.64  | 3.81  | 4.86 | 11.14 |
| 10.18 | 11.32 | 4.33 | 7.64 | 7.79  | 6.15  | 3.51  | 4.33 | 11.92 |
| 9.42  | 11.7  | 5.28 | 8.47 | 7.38  | 5.28  | 2.96  | 5.59 | 11.29 |
| 9.65  | 12.19 | 4.1  | 7.73 | 7.62  | 4.71  | 5.18  | 5.1  | 11.21 |
| 8.91  | 10.8  | 2.82 | 7.9  | 8.44  | 4.2   | 4.5   | 3.82 | 10.54 |

<https://mc.manuscriptcentral.com/gut>

|    |       |       |      |      |       |      |      |      |       |
|----|-------|-------|------|------|-------|------|------|------|-------|
| 1  |       |       |      |      |       |      |      |      |       |
| 2  | 10.09 | 12.24 | 3.08 | 7.65 | 7.69  | 5.12 | 4.17 | 5.29 | 11.36 |
| 3  | 8.82  | 9.89  | 6.26 | 8.04 | 6.96  | 8.26 | 6.49 | 5.46 | 10.05 |
| 4  | 9.16  | 9.82  | 6.38 | 7.47 | 7.66  | 7.12 | 7.07 | 6.32 | 10.54 |
| 5  | 9.07  | 9.45  | 6.22 | 7.51 | 7.57  | 6.85 | 6.86 | 5.98 | 10.51 |
| 6  | 9.23  | 10.24 | 6.03 | 7.76 | 7.41  | 7.53 | 6.96 | 6.36 | 10.64 |
| 7  | 8.73  | 10.27 | 4.62 | 7.15 | 6.57  | 4.75 | 4.62 | 5.14 | 10.34 |
| 8  | 8.88  | 10.28 | 3.25 | 7.73 | 7.5   | 4.15 | 5.53 | 4.33 | 10.7  |
| 9  | 7.97  | 9.67  | 3.53 | 7.59 | 7.25  | 3    | 6.3  | 3.81 | 9.9   |
| 10 | 9.56  | 10.95 | 4.53 | 8.29 | 8.33  | 5.93 | 7.05 | 3.25 | 10.82 |
| 11 | 7.43  | 11.21 | 3.49 | 6.73 | 7.96  | 4.79 | 1.9  | 2.58 | 9.88  |
| 12 | 8.85  | 9.45  | 3.13 | 6.86 | 7.6   | 4.86 | 3.71 | 4.71 | 10.12 |
| 13 | 7.9   | 9.8   | 3.14 | 6.73 | 7.7   | 3.9  | 2.62 | 4.27 | 9.91  |
| 14 | 8.58  | 10.54 | 3.15 | 6.8  | 7.73  | 4.98 | 1.56 | 3.79 | 10.29 |
| 15 | 9.32  | 8.15  | 8.32 | 9.32 | 10.01 | 6.74 | 6.15 | 6.15 | 8.32  |
| 16 | 7.98  | 9.52  | 6    | 8.13 | 7.06  | 7.7  | 6.11 | 6.43 | 10.85 |
| 17 | 8.24  | 10.02 | 6.25 | 7.25 | 7.43  | 7.55 | 6.99 | 6.93 | 10.35 |
| 18 | 9.6   | 1.24  | 7.76 | 8.23 | 9.19  | 9.85 | 8.91 | 8.03 | 8.08  |
| 19 | 9.13  | 1.77  | 8.09 | 8.45 | 9.12  | 9.51 | 8.5  | 8.03 | 8.02  |
| 20 | 7.05  | 9.39  | 6.51 | 7.21 | 6.35  | 6.62 | 6.33 | 6.33 | 9.24  |
| 21 | 6.78  | 8.81  | 6.44 | 7.25 | 6.21  | 6.23 | 6.51 | 6.18 | 8.71  |
| 22 | 8.01  | 8.57  | 6.86 | 7.5  | 6.76  | 6.79 | 6.65 | 7.06 | 9.64  |
| 23 | 9.61  | 10.19 | 5.78 | 7.95 | 7.55  | 5.65 | 2.42 | 6.03 | 11.33 |
| 24 | 9.24  | 10.1  | 5.83 | 8.12 | 7.62  | 6.41 | 4.53 | 6.19 | 10.75 |
| 25 | 9.59  | 10.46 | 6.22 | 8.04 | 7.71  | 7.18 | 6.98 | 6.93 | 11.14 |
| 26 | 9.83  | 11.29 | 2.64 | 7.7  | 8.23  | 4.22 | 5.88 | 4.54 | 10.78 |
| 27 | 9.97  | 12.6  | 2.85 | 7.42 | 8.86  | 4.43 | 6.36 | 4.9  | 11.53 |
| 28 | 10.27 | 12.99 | 2.28 | 7.47 | 8.75  | 5.98 | 5.98 | 5.15 | 11.47 |
| 29 | 8.72  | 10.72 | 5.97 | 7.37 | 7.49  | 6.88 | 6.57 | 6.72 | 10.03 |
| 30 | 8.53  | 11.42 | 5.73 | 7.18 | 7.49  | 7.06 | 6.52 | 6.62 | 10.5  |
| 31 | 8.61  | 10.94 | 5.93 | 7.56 | 7.39  | 7.38 | 7.04 | 6.87 | 10.18 |
| 32 | 9.45  | 10.11 | 6.66 | 7.93 | 8.12  | 8.28 | 8.01 | 7.28 | 10.82 |
| 33 | 8.79  | 8.98  | 6.37 | 7.75 | 8.29  | 8.19 | 7.38 | 6.78 | 9.99  |
| 34 | 8.33  | 7.79  | 6.35 | 8.1  | 8.58  | 8.24 | 7.62 | 7.25 | 10.26 |
| 35 | 9.22  | 12.1  | 5.68 | 7.01 | 7.64  | 6.8  | 6.61 | 6.97 | 10.62 |
| 36 | 9.07  | 11.61 | 5.4  | 7.19 | 7.61  | 7.05 | 6.65 | 7.11 | 10.53 |
| 37 | 9.71  | 12.82 | 5.78 | 7.23 | 7.31  | 7.31 | 6.51 | 7.35 | 11.36 |
| 38 | 9.07  | 11.04 | 6.88 | 7.36 | 7.4   | 7.16 | 7.24 | 7.33 | 10.54 |
| 39 | 9.07  | 11.04 | 6.88 | 7.36 | 7.4   | 7.16 | 7.24 | 7.33 | 10.54 |
| 40 | 9.27  | 9.37  | 6.56 | 7.85 | 7.63  | 7.13 | 7.3  | 6.89 | 10.53 |
| 41 | 9.66  | 11.07 | 6.53 | 7.67 | 7.75  | 7.5  | 7.48 | 7.49 | 11.03 |
| 42 | 9.99  | 11.93 | 6.58 | 7.5  | 7.37  | 7.37 | 7.59 | 6.92 | 11.48 |
| 43 | 8.29  | 7.53  | 6.66 | 6.96 | 7.86  | 7.56 | 7.58 | 7.63 | 8.9   |
| 44 | 9.15  | 10.17 | 6.18 | 7.28 | 7.81  | 7.18 | 7.13 | 7.08 | 10.87 |
| 45 | 9.16  | 10.22 | 5.12 | 7.32 | 6.84  | 6.32 | 6.44 | 6.98 | 10.64 |
| 46 | 9.21  | 10.15 | 6.37 | 7.72 | 7.83  | 7.61 | 7.43 | 7.7  | 10.98 |
| 47 | 8.81  | 9.97  | 2.73 | 7.59 | 4.37  | 7.55 | 4.63 | 4.63 | 11.23 |
| 48 | 7.65  | 8.43  | 0.08 | 8.34 | 5.29  | 6.92 | 4.32 | 3.66 | 10.46 |
| 49 | 8.54  | 10.42 | 3.32 | 8.27 | 4.42  | 6.99 | 3.52 | 4.22 | 11.61 |
| 50 | 8.66  | 8.44  | 6.78 | 7.7  | 7.48  | 7.28 | 7.44 | 7.47 | 9.84  |
| 51 | 9.77  | 10.94 | 6.96 | 7.79 | 7.4   | 7.76 | 7.02 | 7.3  | 11.38 |
| 52 | 9.98  | 10.31 | 6.67 | 7.86 | 7.29  | 7.95 | 7.11 | 7.33 | 11.16 |
| 53 | 8.75  | 9.31  | 5.53 | 7.36 | 7.32  | 6.9  | 7.2  | 7.08 | 10.11 |

<https://mc.manuscriptcentral.com/gut>

|    |       |       |      |       |      |      |      |      |       |
|----|-------|-------|------|-------|------|------|------|------|-------|
| 1  |       |       |      |       |      |      |      |      |       |
| 2  | 9.12  | 10.72 | 5.64 | 7.33  | 7.42 | 6.55 | 7.11 | 6.73 | 10.48 |
| 3  | 9.12  | 9.71  | 6.67 | 7.96  | 8    | 7.9  | 7.87 | 7.69 | 11.09 |
| 4  | 9.75  | 8.78  | 4.33 | 7.97  | 7.96 | 5.74 | 5.42 | 4.77 | 10.54 |
| 5  | 9.34  | 11.61 | 3.66 | 7.86  | 8.1  | 5.6  | 5.03 | 6.54 | 11.71 |
| 6  | 9.92  | 12.8  | 4.4  | 8.28  | 8.46 | 5.58 | 4.66 | 5.19 | 12.61 |
| 7  | 9.29  | 10.4  | 4.58 | 7.64  | 5.16 | 4.87 | 3.73 | 5.83 | 11.47 |
| 8  | 9.75  | 11.4  | 2.36 | 6.79  | 7.73 | 3.36 | 4.64 | 7.13 | 10.93 |
| 9  | 9.37  | 11.72 | 2.93 | 6.92  | 7.02 | 3.76 | 4.97 | 7.38 | 11.11 |
| 10 | 9.08  | 10.55 | 5.66 | 9.12  | 8.45 | 5.3  | 5.49 | 9.99 | 12.92 |
| 11 | 8.83  | 10.57 | 4.7  | 7.13  | 9.36 | 4.11 | 6.32 | 3.79 | 11.43 |
| 12 | 9.93  | 9.5   | 3.3  | 7.31  | 8.27 | 3.66 | 5.58 | 5.62 | 10.58 |
| 13 | 8.65  | 8.76  | 5.25 | 6.88  | 8.09 | 5.75 | 6.8  | 6.55 | 9.46  |
| 14 | 10.02 | 10.78 | 6.65 | 9     | 8.53 | 4.26 | 4.85 | 7.3  | 13.09 |
| 15 | 9.44  | 0.79  | 8.02 | 7.61  | 8.38 | 8.14 | 9.36 | 7.87 | 8.63  |
| 16 | 9.12  | 10.96 | 4.12 | 6.5   | 7.71 | 4.53 | 4.03 | 3.27 | 10.7  |
| 17 | 9.04  | 10.1  | 3.16 | 6.58  | 7.67 | 2.83 | 0    | 4.16 | 10.55 |
| 18 | 9.59  | 10.52 | 3.77 | 6.95  | 7.61 | 4.43 | 3.43 | 3.43 | 10.48 |
| 19 | 8.82  | 11.1  | 2.43 | 6.8   | 6.27 | 3.83 | 1.76 | 4.29 | 10.28 |
| 20 | 8.7   | 11.55 | 4.35 | 6.56  | 7.16 | 6.61 | 6.14 | 5.72 | 10.44 |
| 21 | 8.54  | 11.8  | 3.64 | 6.62  | 7.08 | 5.82 | 5.4  | 4.6  | 10.56 |
| 22 | 6.16  | 5.16  | 6.75 | 10.25 | 8.33 | 7.49 | 6.16 | 8.16 | 11.5  |
| 23 | 6.38  | 9.42  | 2.46 | 5.06  | 7.61 | 3.78 | 3.13 | 4.04 | 10    |
| 24 | 8.08  | 10.56 | 2.12 | 6.34  | 7.83 | 4.93 | 3.71 | 4.44 | 10.46 |
| 25 | 8.98  | 9.47  | 3.99 | 7.92  | 9.98 | 6.67 | 5.77 | 5.18 | 11.39 |
| 26 | 8.99  | 9.75  | 5.15 | 8.59  | 9.95 | 6.74 | 4.49 | 5.08 | 12.22 |
| 27 | 10.08 | 11.68 | 5.35 | 7.67  | 8.83 | 5.9  | 5.13 | 5.79 | 12.3  |
| 28 | 8.63  | 5.95  | 8.11 | 8.22  | 8.12 | 7.87 | 7.94 | 8.13 | 8.7   |
| 29 | 8.38  | 1.86  | 8.05 | 7.75  | 8.3  | 8.24 | 8.02 | 8.25 | 7.69  |
| 30 | 8.02  | 3.35  | 7.23 | 7.92  | 8.52 | 7.94 | 7.88 | 8.34 | 7.35  |
| 31 | 9.4   | 10.42 | 4.1  | 6.14  | 6.79 | 4.4  | 3.92 | 4.47 | 10.89 |
| 32 | 9.76  | 11.42 | 4.18 | 6.72  | 5.98 | 6.36 | 1.91 | 4.11 | 11.85 |
| 33 | 9.19  | 9.85  | 3.28 | 6.97  | 5.75 | 6.38 | 3.28 | 4.5  | 11.12 |
| 34 | 9.96  | 10.76 | 5.24 | 6.87  | 5.48 | 6.13 | 2.48 | 5.48 | 11.71 |
| 35 | 7.7   | 3.04  | 6.77 | 6.97  | 7.35 | 7.85 | 7.33 | 6.75 | 7.73  |
| 36 | 7.26  | 3.42  | 6.25 | 6.3   | 7.22 | 7.33 | 7.38 | 7.1  | 7.69  |
| 37 | 7.08  | 4.59  | 6.55 | 6.31  | 7.1  | 7    | 6.81 | 6.74 | 7.78  |
| 38 | 8.01  | 1.32  | 6.38 | 6.79  | 7.96 | 8.38 | 7.58 | 7.07 | 6.78  |
| 39 | 7.58  | 2.34  | 6.95 | 6.38  | 7.24 | 7.46 | 7.29 | 6.69 | 7.12  |
| 40 | 7.36  | 3.9   | 6.65 | 6.49  | 7.38 | 7.18 | 7.21 | 6.98 | 7.38  |
| 41 | 7.59  | 4.22  | 6.77 | 6.58  | 7.23 | 7.14 | 7.41 | 7.1  | 7.51  |
| 42 | 7.27  | 2.41  | 5    | 6.5   | 8    | 7    | 4.73 | 2.41 | 5.73  |
| 43 | 8.33  | 4.76  | 7.88 | 7.55  | 8.1  | 8.26 | 7.86 | 8.29 | 8.01  |
| 44 | 8.78  | 0.33  | 8.15 | 7.37  | 8.82 | 8.81 | 8.32 | 8.55 | 7.9   |
| 45 | 8     | 5.67  | 7.1  | 7.6   | 7.79 | 7.75 | 6.87 | 7.61 | 8.71  |
| 46 | 8.42  | 4     | 7.54 | 7.78  | 8.09 | 8.43 | 7.77 | 7.98 | 7.91  |
| 47 | 10.02 | 7.56  | 7.06 | 7.49  | 7.55 | 7.35 | 7.42 | 7.21 | 9.34  |
| 48 | 9.79  | 6     | 7.68 | 7.57  | 7.78 | 7.62 | 7.97 | 7.62 | 8.57  |
| 49 | 9.02  | 0.71  | 7.35 | 7.35  | 8.1  | 7.99 | 8.16 | 7.88 | 7.97  |
| 50 | 9.21  | 5.36  | 7.38 | 7.67  | 8.06 | 8.36 | 8.09 | 7.61 | 8.55  |
| 51 | 8.06  | 10.46 | 4.67 | 7.43  | 7.01 | 8.04 | 6.56 | 6.58 | 9.28  |
| 52 | 7.96  | 11.08 | 4.79 | 6.46  | 7.06 | 7.51 | 6.33 | 6.05 | 9.53  |
| 53 | 8.15  | 10.56 | 5.76 | 6.76  | 7.22 | 7.47 | 6.64 | 6.06 | 9.51  |

<https://mc.manuscriptcentral.com/gut>

|    |       |       |      |      |      |      |      |      |       |
|----|-------|-------|------|------|------|------|------|------|-------|
| 1  |       |       |      |      |      |      |      |      |       |
| 2  | 7.81  | 10.15 | 6.22 | 6.97 | 7.05 | 7.78 | 6.96 | 6.46 | 9.07  |
| 3  | 9.04  | 11.7  | 5.87 | 7.93 | 6.47 | 6.82 | 7.27 | 6.49 | 11.05 |
| 4  | 9.84  | 11.79 | 5.86 | 7.97 | 7.04 | 6.87 | 7.05 | 6.09 | 11.24 |
| 5  | 8.23  | 10.79 | 6.41 | 7.54 | 6.85 | 7.05 | 7.3  | 6.03 | 10.18 |
| 6  | 8.37  | 10.86 | 5.8  | 7.68 | 6.61 | 6.84 | 7.46 | 6.25 | 10.1  |
| 7  |       |       |      |      |      |      |      |      |       |
| 8  | 9.33  | 10.57 | 5.93 | 8.07 | 8.62 | 7.33 | 7.45 | 6.87 | 10.69 |
| 9  | 9.91  | 9.85  | 3.43 | 8.32 | 8.11 | 6.37 | 5.37 | 5.09 | 11.5  |
| 10 | 9.58  | 9.33  | 2.79 | 7.75 | 7.46 | 5.65 | 3.68 | 5.15 | 10.86 |
| 11 | 10.45 | 10.65 | 3.74 | 8.97 | 7.93 | 7.78 | 5.33 | 5.6  | 12.39 |
| 12 | 9.15  | 12.71 | 6.22 | 7.56 | 8.91 | 5.29 | 6.85 | 3.93 | 11.33 |
| 13 | 10.16 | 11.79 | 5.38 | 7.82 | 8.74 | 5.84 | 7.13 | 5.52 | 11.68 |
| 14 | 10.47 | 11.76 | 5.34 | 7.84 | 9.11 | 5.91 | 7.27 | 5.97 | 12.09 |
| 15 | 9.86  | 11.65 | 5.62 | 8.02 | 8.35 | 5.92 | 6.81 | 4.92 | 11.66 |
| 16 | 9.16  | 9.33  | 5.74 | 7.59 | 8.35 | 6.12 | 6.05 | 5.87 | 9.98  |
| 17 | 9.33  | 9.7   | 2.32 | 7.78 | 8.55 | 3.9  | 5.49 | 5    | 10.49 |
| 18 |       |       |      |      |      |      |      |      |       |
| 19 | 9.57  | 10.09 | 5.93 | 8.19 | 7.88 | 7.12 | 6.57 | 6.79 | 11.84 |
| 20 | 9.55  | 10.14 | 4    | 7.33 | 6.15 | 6.34 | 4.17 | 4.45 | 11.13 |
| 21 | 10.34 | 11.31 | 2.99 | 7.76 | 6.88 | 4.84 | 5.13 | 2.99 | 11.22 |
| 22 | 10.13 | 12.44 | 2.84 | 7.64 | 6.4  | 6.07 | 3.33 | 4.1  | 12.12 |
| 23 | 8.74  | 10.29 | 4.25 | 8.08 | 3.25 | 4.57 | 0    | 5.29 | 10.62 |
| 24 | 9.43  | 12.07 | 2.71 | 6.83 | 4.13 | 4.67 | 6.66 | 4.5  | 11.47 |
| 25 | 7.82  | 10.21 | 1.8  | 7.13 | 4.23 | 4.57 | 7.16 | 3.94 | 10.56 |
| 26 | 9.54  | 9.71  | 6.23 | 7.21 | 6.89 | 6.83 | 6.5  | 6.78 | 10.75 |
| 27 | 9.34  | 10.69 | 6.14 | 7.14 | 6.91 | 6.6  | 5.88 | 6.54 | 10.88 |
| 28 | 10.34 | 9.38  | 7.24 | 9.67 | 7.4  | 8.19 | 3.15 | 7.15 | 12.84 |
| 29 | 7.3   | 9.05  | 1.36 | 6.68 | 5.61 | 3.36 | 1.36 | 3.17 | 9.33  |
| 30 | 8.97  | 8.46  | 3.79 | 6.35 | 6.28 | 5.31 | 4.49 | 4.49 | 9.81  |
| 31 | 7.6   | 9.64  | 2.93 | 6.73 | 6.39 | 4.93 | 3.09 | 3.93 | 10    |
| 32 | 9.46  | 9.92  | 1.9  | 5.48 | 5.6  | 5.36 | 4.48 | 3.48 | 10.24 |
| 33 | 7.66  | 3.34  | 6.57 | 6.97 | 7.28 | 6.89 | 7.08 | 7.37 | 6.66  |
| 34 | 7.51  | 6.18  | 6.39 | 7.29 | 6.7  | 7.18 | 7.23 | 7.76 | 8.43  |
| 35 | 7.72  | 0.88  | 7.01 | 7.11 | 7.31 | 7.34 | 7.47 | 7.82 | 6.67  |
| 36 | 7.46  | 2.96  | 6.79 | 6.84 | 6.89 | 6.93 | 7.07 | 7.81 | 7.53  |
| 37 | 8.05  | 7.88  | 5.09 | 6.14 | 6.79 | 5.53 | 5.57 | 5.82 | 8.64  |
| 38 | 8.19  | 7.44  | 6.17 | 6.29 | 6.53 | 6.37 | 6.07 | 6.47 | 8.9   |
| 39 | 8.17  | 8.59  | 6.03 | 6.32 | 6.82 | 6.45 | 5.98 | 6.14 | 9.49  |
| 40 | 8.72  | 9.58  | 5.78 | 6.49 | 6.51 | 6.37 | 5.81 | 6.19 | 10.02 |
| 41 | 8.55  | 7.92  | 1.94 | 7.03 | 3.35 | 2.68 | 0.35 | 2.94 | 9.49  |
| 42 | 9.11  | 9.78  | 4.46 | 7.61 | 6.71 | 6.37 | 6.22 | 5.63 | 11.03 |
| 43 | 8.79  | 8.07  | 2.42 | 7.56 | 3.42 | 4.12 | 1.42 | 5.37 | 10.45 |
| 44 | 8.83  | 7.36  | 3.82 | 9.31 | 3.23 | 3.82 | 4.55 | 7.32 | 11.77 |
| 45 | 8.15  | 11.19 | 5.98 | 6.88 | 8.2  | 6.04 | 7.05 | 5.91 | 9.85  |
| 46 | 8.1   | 8.68  | 4.51 | 9.83 | 6.1  | 5.51 | 6.1  | 8.1  | 12.43 |
| 47 | 8.72  | 11.42 | 0.87 | 6.75 | 6.92 | 4.68 | 4.68 | 5.08 | 11.11 |
| 48 | 9.14  | 12.64 | 2.94 | 6.58 | 6.38 | 4.94 | 4.39 | 4.69 | 11.8  |
| 49 | 8.79  | 10.72 | 1.68 | 8.07 | 7.82 | 3.85 | 2.27 | 0.68 | 7.9   |
| 50 | 9.52  | 11.8  | 3.98 | 8.28 | 7.55 | 6.01 | 4.84 | 5.27 | 10.63 |
| 51 | 9.31  | 11.93 | 1.86 | 7.94 | 7.39 | 4.6  | 3.28 | 4.08 | 10.44 |
| 52 | 9.18  | 11.74 | 5.47 | 7.78 | 7.69 | 6.28 | 5.47 | 6.04 | 10.16 |
| 53 | 8.65  | 9.98  | 1.89 | 7.27 | 6.06 | 3.16 | 1.16 | 2.38 | 10.83 |
| 54 | 9.31  | 9.68  | 5.11 | 6.68 | 6.28 | 6.26 | 5.05 | 5.57 | 10.09 |
| 55 | 8.99  | 8.96  | 5    | 6.65 | 6.06 | 5.96 | 5.36 | 5.62 | 10.02 |
| 56 |       |       |      |      |      |      |      |      |       |
| 57 |       |       |      |      |      |      |      |      |       |
| 58 |       |       |      |      |      |      |      |      |       |
| 59 |       |       |      |      |      |      |      |      |       |
| 60 |       |       |      |      |      |      |      |      |       |

|       |       |      |       |      |      |      |       |       |
|-------|-------|------|-------|------|------|------|-------|-------|
| 9.89  | 9.53  | 2.79 | 7.96  | 5.6  | 7.09 | 3.37 | 4.49  | 10.7  |
| 9.16  | 11.03 | 5.49 | 7.14  | 6.39 | 6.53 | 3.91 | 3.91  | 11.29 |
| 8.05  | 8.72  | 4.83 | 5.76  | 6.11 | 5.17 | 4.76 | 5.59  | 10.14 |
| 7.57  | 8.72  | 3.66 | 5.95  | 6.44 | 5.44 | 4.95 | 4.66  | 10.24 |
| 7.55  | 5.25  | 6.98 | 7.25  | 7.46 | 7.46 | 6.68 | 7.39  | 9.8   |
| 7.24  | 11.23 | 2.89 | 5.79  | 1.89 | 4.52 | 2.37 | 5.18  | 10.09 |
| 6.57  | 8.94  | 1.39 | 5.89  | 2.77 | 3.77 | 1.07 | 1.39  | 8.56  |
| 6.21  | 8.61  | 0    | 5.83  | 2.16 | 3.26 | 0    | 0.94  | 8.37  |
| 7.88  | 0.27  | 6.78 | 6.84  | 7.96 | 7.9  | 7.35 | 7.69  | 7.37  |
| 8.91  | 8.16  | 6.28 | 6.75  | 7.03 | 7.3  | 6.75 | 6.8   | 9.99  |
| 9.5   | 9.12  | 2.65 | 7.4   | 7.69 | 4.24 | 4.65 | 3.46  | 11.29 |
| 9.99  | 9.75  | 5.98 | 7.26  | 7.47 | 7.32 | 5.64 | 5.89  | 10.83 |
| 10.51 | 9.64  | 4    | 7.86  | 6.84 | 7.36 | 5.47 | 4.21  | 11.28 |
| 10.15 | 10.77 | 5.17 | 7.02  | 6.84 | 7.68 | 5.55 | 5.77  | 11.92 |
| 8.97  | 8.63  | 6.24 | 10.63 | 8.07 | 3.54 | 2.54 | 11.81 | 11.8  |
| 8.54  | 9.76  | 3.26 | 7.06  | 6.77 | 5.32 | 4.32 | 4.26  | 9.42  |
| 9.17  | 9.03  | 4.63 | 6.99  | 6.15 | 6.2  | 5.68 | 5.83  | 9.05  |
| 8.75  | 9.79  | 2.92 | 7.35  | 7.02 | 5.11 | 4.4  | 3.45  | 9.66  |

1  
2  
3  
4  
5  
6  
7  
8  
9  
10  
11  
12  
13  
14  
15  
16  
17  
18  
19  
20  
21  
22  
23  
24  
25  
26  
27  
28  
29  
30  
31  
32  
33  
34  
35  
36  
37  
38  
39  
40  
41  
42  
43  
44  
45  
46  
47  
48  
49  
50  
51  
52  
53  
54  
55  
56  
57  
58  
59  
60

| FUT3 | FXVD6 | GALNT7 | GATA4 | GDF15 | GDF5 | GDF6 | GIMAP4 | GIMAP6 |
|------|-------|--------|-------|-------|------|------|--------|--------|
| 8.03 | 7.69  | 5.63   | 6.74  | 8.62  | 7.04 | 6.39 | 8.94   | 6.97   |
| 9.68 | 7.66  | 6.92   | 6.59  | 9.59  | 6.99 | 5.74 | 8.27   | 6.55   |
| 9.39 | 7.55  | 6.97   | 6.54  | 8.84  | 6.62 | 6.11 | 8.09   | 6.8    |
| 9.6  | 9.02  | 7.07   | 6.06  | 10.45 | 3.35 | 3.5  | 8.79   | 7.16   |
| 7.96 | 8.67  | 3.82   | 7.1   | 7.37  | 8.89 | 8.05 | 8.48   | 6.74   |
| 8.88 | 7.79  | 7.64   | 5.49  | 6.75  | 6.6  | 5.88 | 8.12   | 5.92   |
| 8.71 | 7.37  | 8.11   | 6.07  | 7.28  | 6.58 | 6.05 | 8.23   | 6.2    |
| 9.53 | 8.77  | 8.53   | 5.64  | 8.14  | 1.98 | 3.72 | 8.58   | 6.12   |
| 6.43 | 8.08  | 9.23   | 6.54  | 8.88  | 2.37 | 3.17 | 9.04   | 6.97   |
| 8.12 | 7.31  | 9.69   | 6.35  | 7.6   | 6.34 | 5.98 | 7.46   | 6.46   |
| 8.92 | 7.67  | 10.16  | 6.98  | 8.28  | 0.38 | 1.96 | 7.76   | 5.59   |
| 8.38 | 8.42  | 9.84   | 6.14  | 8.24  | 0.68 | 3.85 | 8.3    | 6.64   |
| 8.74 | 7.47  | 6.67   | 6.1   | 9.83  | 7.57 | 6.47 | 7.68   | 5.88   |
| 8.25 | 7.7   | 6.73   | 6.23  | 9.52  | 7.5  | 6.9  | 8.38   | 6.6    |
| 7.55 | 10.34 | 6.58   | 1.77  | 10.68 | 1.77 | 4.35 | 9.68   | 7.77   |
| 7.84 | 8.43  | 7.76   | 6.78  | 7.5   | 7.35 | 6.72 | 8.66   | 6.87   |
| 8.06 | 8.78  | 7.7    | 6.78  | 8.76  | 7.02 | 6.72 | 7.9    | 6.38   |
| 7.69 | 9.09  | 7.64   | 7.3   | 8.58  | 7.39 | 7.29 | 8.06   | 6.64   |
| 3.22 | 9.27  | 7.64   | 6.29  | 9.61  | 2.48 | 3.7  | 10.44  | 8.35   |
| 8.34 | 8.18  | 8.79   | 7.11  | 9.78  | 1.31 | 3.01 | 9.38   | 7.43   |
| 5.91 | 9.24  | 7.67   | 6.25  | 9.3   | 2.5  | 3.75 | 10.26  | 8.12   |
| 9.6  | 8.73  | 8.9    | 6.15  | 8.45  | 4.06 | 3.15 | 8.39   | 6.21   |
| 9.54 | 8.56  | 8.78   | 6.37  | 9.18  | 1.78 | 3.01 | 8.34   | 6.11   |
| 9.56 | 9.07  | 9.05   | 6.27  | 8.68  | 2.22 | 3.35 | 7.82   | 6.06   |
| 2.43 | 7.25  | 7.55   | 9.26  | 6.21  | 0.43 | 3.75 | 8.25   | 5.89   |
| 7.73 | 6.54  | 8.24   | 7.83  | 8.86  | 0.13 | 2.45 | 7.21   | 5.3    |
| 8.37 | 6.47  | 8.28   | 7.86  | 9.04  | 3.98 | 2.84 | 7.13   | 5.16   |
| 8.14 | 7.13  | 8.31   | 7.69  | 8.5   | 6.79 | 5.94 | 7.66   | 5.85   |
| 8.1  | 7.36  | 7.33   | 7     | 6.72  | 7.07 | 6    | 8      | 6      |
| 8.19 | 8.2   | 7.51   | 6.51  | 7.54  | 7.27 | 6.2  | 8.19   | 6.46   |
| 8.61 | 8.01  | 7.67   | 6.77  | 7.5   | 7.29 | 5.81 | 7.47   | 5.92   |
| 8.46 | 8.5   | 6.52   | 7.28  | 7.54  | 7.7  | 7.08 | 8.4    | 6.66   |
| 6.17 | 8.37  | 5.88   | 6.69  | 6.54  | 6.8  | 6.29 | 9.91   | 7.71   |
| 5.73 | 8.72  | 7.49   | 5.81  | 7.79  | 3.06 | 2.64 | 8.24   | 6.53   |
| 7.73 | 7.93  | 8.16   | 6.58  | 8.39  | 1.93 | 2.42 | 7.95   | 6.07   |
| 6.49 | 9.13  | 7.74   | 6.14  | 8.28  | 2.47 | 1.47 | 8.51   | 6.72   |
| 6.33 | 7.79  | 6.65   | 5.09  | 7.64  | 0.45 | 3.62 | 9.85   | 7.55   |
| 6.31 | 6.65  | 7.94   | 4.31  | 7.51  | 2.4  | 2.21 | 9.22   | 6.94   |
| 3.69 | 7.45  | 6.95   | 4.07  | 6.83  | 2.37 | 3.17 | 9.91   | 7.45   |
| 4.14 | 7.74  | 7.16   | 4.5   | 6.71  | 4.27 | 2.91 | 10.1   | 7.73   |
| 6.55 | 7.35  | 5.99   | 5.97  | 6.52  | 7.08 | 6.69 | 8.27   | 6.24   |
| 6.78 | 7.27  | 6.68   | 5.63  | 7.24  | 6.98 | 6.97 | 7.52   | 5.9    |
| 6.59 | 6.92  | 6.66   | 5.47  | 5.89  | 7.38 | 6.58 | 7.71   | 5.95   |
| 6.79 | 6.69  | 6.85   | 5.17  | 7.24  | 6.54 | 5.84 | 7.47   | 5.24   |
| 4.86 | 9.22  | 8.25   | 9.41  | 9.6   | 3.86 | 5.18 | 7.03   | 6.32   |
| 6.76 | 7.27  | 8.5    | 7.99  | 7.12  | 1.9  | 2.31 | 7.61   | 6.2    |
| 6.47 | 7.79  | 7.65   | 7.74  | 7.18  | 0    | 3.32 | 7.91   | 6.47   |
| 5.62 | 8.47  | 7.39   | 7.28  | 6.33  | 1.81 | 3.98 | 7.61   | 5.87   |
| 7.03 | 7.9   | 8.17   | 3.44  | 8.57  | 2.22 | 3.44 | 9.26   | 7.42   |
| 8.18 | 7.79  | 8.15   | 4.26  | 8.04  | 2.01 | 2.82 | 8.82   | 6.72   |
| 7.15 | 7.5   | 8.38   | 5.89  | 9.02  | 3.08 | 4.08 | 8.91   | 7.1    |

<https://mc.manuscriptcentral.com/gut>

1  
2  
3  
4  
5  
6  
7  
8  
9  
10  
11  
12  
13  
14  
15  
16  
17  
18  
19  
20  
21  
22  
23  
24  
25  
26  
27  
28  
29  
30  
31  
32  
33  
34  
35  
36  
37  
38  
39  
40  
41  
42  
43  
44  
45  
46  
47  
48  
49  
50  
51  
52  
53  
54  
55  
56  
57  
58  
59  
60

|      |      |       |      |       |       |      |      |      |
|------|------|-------|------|-------|-------|------|------|------|
| 7.21 | 8.34 | 8.4   | 4.78 | 7.61  | 1.66  | 3.99 | 9.25 | 7.12 |
| 8.22 | 7.71 | 7.47  | 6.67 | 11.13 | 7.58  | 6.63 | 7.86 | 5.84 |
| 7.23 | 7.92 | 7.92  | 6.76 | 9.32  | 7.59  | 6.88 | 7.85 | 6.58 |
| 8.57 | 7.55 | 7.83  | 6.6  | 8.89  | 7.49  | 6.51 | 7.5  | 6.22 |
| 7.34 | 8.44 | 7.65  | 6.52 | 8.96  | 7.62  | 6.87 | 8.09 | 6.22 |
| 3.69 | 8.27 | 9.48  | 8.2  | 5.72  | 5.62  | 4.93 | 9.49 | 7.25 |
| 5    | 7.97 | 9.78  | 8.55 | 7.85  | 4.05  | 1.83 | 8.11 | 6.31 |
| 4    | 6.44 | 10.18 | 9.08 | 8.64  | 3.32  | 0    | 6.92 | 5.05 |
| 4.44 | 9.05 | 9.32  | 8.66 | 8.83  | 3.44  | 3.02 | 7.85 | 5.35 |
| 8.12 | 5.92 | 7.07  | 7.44 | 7.33  | 2.9   | 3.04 | 7.83 | 5.99 |
| 7.98 | 6.79 | 8.54  | 7.51 | 7.07  | 2.13  | 0.54 | 8.04 | 6.16 |
| 7.53 | 6.65 | 7.81  | 7.26 | 7.57  | 3.62  | 1.82 | 7.42 | 5.49 |
| 6.91 | 7.97 | 7.46  | 7.38 | 7.17  | 0.98  | 2.3  | 7.8  | 5.88 |
| 6.15 | 9.61 | 7.15  | 9.32 | 8.32  | 10.67 | 6.15 | 8.47 | 5.15 |
| 8.01 | 9.13 | 6.49  | 6.96 | 7.98  | 7.67  | 6.65 | 9.06 | 7.25 |
| 7.53 | 8.46 | 6.24  | 6.48 | 6.99  | 7.9   | 7.26 | 8.82 | 6.86 |
| 9.32 | 9.75 | 0.24  | 9.14 | 8.99  | 9.98  | 8.54 | 9.4  | 7.75 |
| 9.08 | 9.7  | 2.77  | 9.27 | 9.32  | 9.98  | 8.72 | 9.21 | 7.65 |
| 9.14 | 6.65 | 8.44  | 8.16 | 10.74 | 7.17  | 6.16 | 7.34 | 5.87 |
| 9.77 | 6.32 | 8.54  | 8.08 | 10.53 | 7.11  | 6.2  | 7.23 | 5.99 |
| 8.99 | 7.06 | 8.2   | 8.17 | 10.07 | 7.63  | 6.73 | 8    | 6.33 |
| 8.7  | 8.33 | 8.89  | 6.4  | 9.71  | 1.42  | 3.68 | 7.93 | 5.97 |
| 9.02 | 8.15 | 9.07  | 6.01 | 9.67  | 6.03  | 5.32 | 7.83 | 5.92 |
| 8.08 | 8.24 | 8.74  | 6.88 | 8.29  | 7.59  | 7.03 | 8.33 | 6.8  |
| 8.54 | 7.77 | 9.89  | 7.98 | 8.05  | 4.54  | 3.22 | 8.8  | 6.83 |
| 7.82 | 7.99 | 9.47  | 7.09 | 8.61  | 4.29  | 3.5  | 8.45 | 6.45 |
| 6.86 | 8.61 | 9.17  | 7.12 | 8.01  | 3.01  | 4.69 | 8.43 | 6.36 |
| 6.91 | 7.32 | 7.81  | 6.27 | 8.91  | 7.11  | 6.47 | 7.93 | 6.29 |
| 5.76 | 7.65 | 7.47  | 6.32 | 9.21  | 6.98  | 6.35 | 7.8  | 6.45 |
| 6.4  | 8    | 7.37  | 6.55 | 8.4   | 7.01  | 6.78 | 8.24 | 6.44 |
| 9.09 | 8.09 | 8.34  | 6.96 | 11.16 | 7.49  | 6.99 | 8.34 | 6.98 |
| 9.31 | 8.02 | 8.5   | 7.29 | 10.61 | 7.97  | 6.57 | 8.09 | 6.81 |
| 9.58 | 7.73 | 8.33  | 7.4  | 10.67 | 8.19  | 6.82 | 8.34 | 6.91 |
| 7.31 | 8.29 | 7.37  | 7.18 | 8.85  | 7.62  | 6.91 | 7.96 | 6.67 |
| 8.32 | 7.84 | 8.16  | 7.89 | 9.18  | 7.71  | 6.93 | 7.87 | 6.55 |
| 7.1  | 8.51 | 6.96  | 6.8  | 9.21  | 7.6   | 6.94 | 7.96 | 6.51 |
| 8.12 | 8.31 | 7.21  | 6.59 | 6.32  | 7.62  | 7.36 | 8.66 | 6.74 |
| 8.12 | 8.31 | 7.21  | 6.59 | 6.32  | 7.62  | 7.36 | 8.66 | 6.74 |
| 9.34 | 8.95 | 8.14  | 6.51 | 8.81  | 7.43  | 7.24 | 7.99 | 6.13 |
| 8.91 | 8.9  | 8.14  | 7.04 | 7.59  | 7.64  | 7.34 | 7.91 | 6.65 |
| 8.91 | 8.75 | 7.69  | 6.44 | 6.92  | 7.6   | 7.1  | 7.82 | 6.26 |
| 7.05 | 8.07 | 5.56  | 6.95 | 8.55  | 7.86  | 7.31 | 8.81 | 7.17 |
| 6.77 | 8.09 | 6.66  | 6.55 | 9.97  | 7.37  | 6.55 | 7.87 | 6.72 |
| 7.61 | 7.42 | 8.06  | 7.11 | 10.49 | 7.17  | 6.2  | 7.43 | 6.12 |
| 7.3  | 8.99 | 7.12  | 7.23 | 8.75  | 7.8   | 7.23 | 8.26 | 6.74 |
| 9.94 | 8.22 | 8.01  | 7.37 | 10.38 | 2.53  | 1.73 | 7.47 | 5.4  |
| 10.1 | 7.36 | 8.25  | 7.23 | 10.39 | 2.4   | 2.08 | 5.96 | 4.6  |
| 9.89 | 8.78 | 7.68  | 6.93 | 10.59 | 2.1   | 2.84 | 8.49 | 6.75 |
| 6.53 | 7.77 | 5.4   | 6.78 | 6.6   | 7.64  | 7.35 | 9.18 | 6.94 |
| 7.63 | 8.98 | 6.28  | 6.55 | 8.23  | 7.53  | 7.1  | 8.33 | 6.57 |
| 7.81 | 9.13 | 5.92  | 6.01 | 7.91  | 7.34  | 7.35 | 8.26 | 6.1  |
| 7.82 | 7.47 | 7.3   | 6.59 | 7.83  | 7.08  | 6.61 | 7.91 | 6.35 |

<https://mc.manuscriptcentral.com/gut>



1  
2  
3  
4  
5  
6  
7  
8  
9  
10  
11  
12  
13  
14  
15  
16  
17  
18  
19  
20  
21  
22  
23  
24  
25  
26  
27  
28  
29  
30  
31  
32  
33  
34  
35  
36  
37  
38  
39  
40  
41  
42  
43  
44  
45  
46  
47  
48  
49  
50  
51  
52  
53  
54  
55  
56  
57  
58  
59  
60

|      |       |       |      |       |      |      |      |      |
|------|-------|-------|------|-------|------|------|------|------|
| 8    | 7.38  | 7.19  | 6.12 | 7.55  | 7.14 | 6.49 | 7.5  | 5.47 |
| 7.99 | 8.96  | 5.64  | 7.4  | 7.24  | 7.97 | 7.39 | 7.98 | 6.24 |
| 5.47 | 8.45  | 7.87  | 5.57 | 10.25 | 6.04 | 4.57 | 9.86 | 7.31 |
| 8.91 | 8.29  | 8.95  | 6.75 | 9.18  | 4.83 | 3.4  | 8.4  | 6.92 |
| 7.38 | 8.86  | 8.54  | 6.62 | 9.55  | 3.66 | 4.49 | 8.64 | 6.98 |
| 8    | 8.04  | 8.43  | 6.11 | 8.38  | 3.21 | 3.41 | 9.43 | 7.63 |
| 8.41 | 6.99  | 11.2  | 7.54 | 9.8   | 1.55 | 0    | 7.23 | 5.25 |
| 8.45 | 7.49  | 10.41 | 7.28 | 10.53 | 3.22 | 3.22 | 7.76 | 6    |
| 8.68 | 10.5  | 10.04 | 7.78 | 12.4  | 5.08 | 3.49 | 9.11 | 7.99 |
| 7.42 | 8.22  | 9.1   | 6.44 | 8.18  | 1.79 | 3.6  | 8.8  | 6.63 |
| 8.71 | 7.4   | 9.32  | 6.53 | 8.85  | 2.08 | 2.49 | 7.59 | 5.44 |
| 8.22 | 7.22  | 8.72  | 6.74 | 7.89  | 7.58 | 6.28 | 7.63 | 5.85 |
| 8.41 | 10.64 | 8.49  | 6.26 | 9.69  | 3.85 | 4.58 | 8.78 | 6.43 |
| 7.22 | 9.12  | 0     | 8.61 | 7.61  | 9.83 | 9.31 | 9.06 | 7.55 |
| 8.63 | 7.16  | 6.37  | 6.32 | 7.99  | 4.9  | 4.03 | 5.99 | 5.19 |
| 8.74 | 6.12  | 7.14  | 6.43 | 8.24  | 0    | 2.64 | 6.49 | 4.54 |
| 8.62 | 7.13  | 7.36  | 6.37 | 8.04  | 4.38 | 3.22 | 6.66 | 4.88 |
| 6.79 | 7.43  | 7.65  | 5.7  | 6.82  | 2.24 | 3.52 | 8.92 | 6.68 |
| 5.64 | 8.04  | 6.51  | 5.82 | 6.35  | 6.76 | 5.7  | 8.64 | 6.41 |
| 4.89 | 8.11  | 6.97  | 5.12 | 6.43  | 6.4  | 4.6  | 9.12 | 6.59 |
| 6.16 | 11.09 | 6.16  | 5.16 | 10.33 | 7.49 | 5.16 | 8.49 | 6.16 |
| 7.46 | 5.95  | 8.92  | 5.66 | 8.08  | 3.22 | 2.3  | 7.3  | 5.04 |
| 6.82 | 7.07  | 8.82  | 5.99 | 7.58  | 3.86 | 2.86 | 8.62 | 5.96 |
| 7.27 | 9.31  | 6.91  | 6.79 | 10.34 | 2.77 | 1.18 | 7.54 | 6.35 |
| 8.18 | 10.32 | 7.28  | 6.3  | 10.25 | 2.49 | 3.49 | 8.43 | 7.17 |
| 7    | 8.66  | 6.88  | 4.93 | 8.98  | 2.13 | 4.63 | 8.45 | 6.63 |
| 7.34 | 8.07  | 4.32  | 7.3  | 7.82  | 8.63 | 8.05 | 8.36 | 6.78 |
| 7.43 | 8.25  | 0.86  | 7.49 | 6.72  | 8.8  | 7.83 | 8.28 | 7.01 |
| 7.47 | 8.23  | 3.35  | 7.55 | 6.41  | 8.35 | 8.09 | 8.29 | 7.47 |
| 7.78 | 7.33  | 6.8   | 7.58 | 7.56  | 1.01 | 3.33 | 7.52 | 5.71 |
| 7.15 | 8.89  | 6.39  | 6.67 | 8.41  | 0    | 4.18 | 7.37 | 6.05 |
| 8.79 | 8.86  | 7.28  | 8.11 | 9.63  | 0.11 | 3.69 | 7.22 | 5.66 |
| 7.29 | 8.22  | 6.13  | 6.88 | 8.79  | 1.74 | 5.11 | 7.54 | 5.11 |
| 6.97 | 7.65  | 2.45  | 6.77 | 6.97  | 7.9  | 7.01 | 7.81 | 6.7  |
| 6.23 | 6.9   | 4.5   | 6.46 | 5.9   | 7.87 | 6.95 | 7.6  | 6.13 |
| 5.99 | 6.94  | 4.51  | 6.65 | 6.12  | 7.67 | 6.67 | 7.5  | 5.85 |
| 7.43 | 8.17  | 0     | 7.56 | 6.72  | 8.51 | 7.64 | 8    | 6.82 |
| 6.24 | 7.04  | 1.34  | 6.92 | 5.66  | 7.6  | 6.95 | 8.06 | 6.14 |
| 6.8  | 7.38  | 3.42  | 6.52 | 4.9   | 7.51 | 7.12 | 7.4  | 6.59 |
| 6.56 | 7.24  | 3.89  | 6.4  | 5.22  | 7.59 | 6.85 | 7.56 | 6.48 |
| 8.77 | 7.5   | 2.41  | 7.22 | 8.19  | 7.9  | 6.5  | 6.73 | 6.58 |
| 7.43 | 8.28  | 4.06  | 7.78 | 6.99  | 8.49 | 7.9  | 8.78 | 7.43 |
| 7.76 | 8.52  | 2.5   | 7.99 | 6.9   | 9.28 | 8.13 | 8.75 | 7.37 |
| 6.84 | 7.8   | 7.74  | 7.44 | 8.83  | 8.15 | 7.02 | 8.46 | 6.33 |
| 7.54 | 8.15  | 5.11  | 7.79 | 7.74  | 8.85 | 7.94 | 8.52 | 7.07 |
| 7.5  | 8.06  | 6.15  | 6.82 | 7.87  | 7.54 | 7.36 | 8.38 | 6.38 |
| 7.56 | 8.08  | 4.75  | 7.02 | 8.62  | 8.35 | 8.15 | 7.91 | 6.62 |
| 7.7  | 7.8   | 2.71  | 6.92 | 6.32  | 8.56 | 8.27 | 8.12 | 6.35 |
| 8.36 | 8.35  | 2.9   | 7.72 | 7.82  | 8.59 | 8.07 | 8.31 | 6.37 |
| 5.98 | 6.58  | 6.82  | 6.04 | 9.35  | 7.23 | 7.81 | 7.81 | 5.89 |
| 6.99 | 6.63  | 7.27  | 5.83 | 8.99  | 6.51 | 7.45 | 7.66 | 6.07 |
| 6.67 | 7.13  | 7.11  | 5.99 | 9.17  | 6.88 | 7.1  | 7.9  | 6.01 |

<https://mc.manuscriptcentral.com/gut>

1  
2  
3  
4  
5  
6  
7  
8  
9  
10  
11  
12  
13  
14  
15  
16  
17  
18  
19  
20  
21  
22  
23  
24  
25  
26  
27  
28  
29  
30  
31  
32  
33  
34  
35  
36  
37  
38  
39  
40  
41  
42  
43  
44  
45  
46  
47  
48  
49  
50  
51  
52  
53  
54  
55  
56  
57  
58  
59  
60

|       |       |      |      |       |      |      |      |      |
|-------|-------|------|------|-------|------|------|------|------|
| 6.71  | 7.15  | 7.11 | 6    | 9.79  | 6.88 | 7.55 | 8.08 | 6.31 |
| 8.5   | 8.03  | 7.96 | 6.45 | 8.11  | 6.82 | 6.49 | 8.73 | 6.86 |
| 8.86  | 8.18  | 9.15 | 7.15 | 8.35  | 7.53 | 6.69 | 8.17 | 6.43 |
| 8.68  | 7.17  | 8.2  | 6.2  | 9.57  | 7.2  | 6.2  | 7.85 | 6.13 |
| 8.54  | 7.51  | 8.3  | 6.21 | 9.32  | 7.03 | 6.26 | 7.96 | 6.3  |
| 8.11  | 8.53  | 7.49 | 7.08 | 7.43  | 7.07 | 6.7  | 9.31 | 7.04 |
| 9.24  | 9.13  | 8.6  | 7.65 | 9.73  | 4.16 | 4.54 | 9.08 | 7.11 |
| 8.91  | 8.38  | 8.61 | 7.62 | 9.47  | 4.73 | 3.89 | 8.71 | 6.59 |
| 7.9   | 10.74 | 7.99 | 7.23 | 9.72  | 4.65 | 5.39 | 9.97 | 7.81 |
| 10.09 | 8.1   | 8.49 | 7.67 | 10.09 | 6.81 | 5.29 | 8.33 | 6.76 |
| 9.59  | 8.59  | 8.94 | 7.22 | 8.95  | 6.51 | 5.52 | 8.86 | 6.97 |
| 9.91  | 8.48  | 8.86 | 7.58 | 8.93  | 6.83 | 4.63 | 8.76 | 7.19 |
| 9.95  | 9.13  | 9.32 | 7.51 | 9.61  | 6.19 | 3.76 | 8.3  | 6.57 |
| 8.72  | 7.4   | 7.64 | 6.19 | 6.78  | 6.54 | 5.74 | 8.22 | 6.3  |
| 9.25  | 7.34  | 8.36 | 6.43 | 8.53  | 2.32 | 2.51 | 8    | 5.94 |
| 7.64  | 10.18 | 7.11 | 6.32 | 7.55  | 6.12 | 6.19 | 8.45 | 7.16 |
| 4.75  | 8.83  | 7.09 | 4.08 | 8.59  | 2.32 | 4.24 | 9.89 | 7.43 |
| 9.05  | 8.26  | 9.33 | 7.78 | 9.37  | 0.67 | 4.13 | 7.91 | 5.91 |
| 8.19  | 9.41  | 7.77 | 6.25 | 9.1   | 2.52 | 2.52 | 8.81 | 6.75 |
| 8.55  | 7.04  | 7.55 | 8.09 | 8.51  | 2.25 | 3.25 | 8.52 | 6.53 |
| 7.57  | 7.63  | 7.56 | 4.63 | 11.48 | 3.24 | 3.45 | 6.56 | 4.9  |
| 7.38  | 6.72  | 7.6  | 4.94 | 10.04 | 1.48 | 1.06 | 5.94 | 4.18 |
| 8.26  | 8.32  | 8.21 | 7.13 | 9.21  | 6.57 | 6.32 | 7.81 | 6.46 |
| 8.51  | 8.14  | 8.37 | 6.54 | 10.34 | 5.97 | 5.84 | 7.59 | 6.45 |
| 8.4   | 12.07 | 6.74 | 6.32 | 10.57 | 6.32 | 4.74 | 8.19 | 6.74 |
| 0.36  | 6.87  | 6.34 | 3.53 | 7.55  | 0.36 | 2.68 | 8.73 | 6.41 |
| 6.22  | 7.08  | 7.45 | 4.96 | 8.93  | 5.43 | 4.25 | 7.89 | 5.84 |
| 3.22  | 6.41  | 6.35 | 4.29 | 8.73  | 4.97 | 3.09 | 7.38 | 5.09 |
| 1.9   | 8.77  | 7.19 | 3.48 | 8.56  | 1.9  | 1.9  | 8.47 | 5.71 |
| 6.34  | 7.04  | 2.76 | 6.4  | 6.22  | 7.57 | 6.8  | 7.54 | 5.85 |
| 7.51  | 7.36  | 4.3  | 6.36 | 6.87  | 7.3  | 6.76 | 7.24 | 5.53 |
| 7.15  | 7.48  | 3.21 | 6.84 | 6.13  | 7.48 | 7.41 | 7.74 | 6.24 |
| 6.63  | 7.24  | 1.96 | 6.38 | 5.81  | 7.37 | 7.19 | 7.13 | 6.24 |
| 7.55  | 6.66  | 7.65 | 7.85 | 6.06  | 5.94 | 5.55 | 7.38 | 5.61 |
| 6.78  | 6.9   | 6.2  | 7.92 | 6.02  | 6.61 | 5.59 | 7.35 | 5.73 |
| 6.44  | 7     | 6.03 | 7.45 | 5.81  | 6.62 | 6.11 | 7.3  | 5.74 |
| 6.64  | 7.65  | 5.78 | 7.1  | 5.66  | 6.44 | 6.04 | 7.24 | 5.67 |
| 0.35  | 8.05  | 6.75 | 1.94 | 3.35  | 1.35 | 2.68 | 9.76 | 7.45 |
| 8.52  | 7.85  | 8.23 | 6.11 | 8.18  | 5.92 | 4.05 | 8.28 | 6.05 |
| 6.03  | 7.19  | 8.97 | 7.19 | 9.38  | 1.42 | 2.42 | 8.84 | 6.55 |
| 5.69  | 9.93  | 8.57 | 7.36 | 10.02 | 3.23 | 2.23 | 9.74 | 7.48 |
| 5.78  | 7.41  | 6.93 | 7.17 | 9.08  | 6.16 | 6.09 | 8.12 | 6.24 |
| 6.51  | 10.8  | 8.1  | 6.83 | 11.14 | 4.51 | 5.51 | 9.37 | 8.1  |
| 8.21  | 8.33  | 8.39 | 9.26 | 7.96  | 1.45 | 5.08 | 7.84 | 6.21 |
| 7.97  | 9.16  | 8.17 | 9.37 | 7.05  | 0    | 4.39 | 7.34 | 5.82 |
| 7.5   | 7.31  | 7.12 | 6.99 | 7.99  | 2.27 | 0.68 | 4.68 | 4.59 |
| 5.87  | 8.39  | 6.96 | 6.93 | 7.38  | 6.63 | 4.89 | 8.19 | 6.46 |
| 5.92  | 8.25  | 7.21 | 6.23 | 7.77  | 3.45 | 1.86 | 7.81 | 5.98 |
| 6.01  | 8.29  | 6.7  | 6.6  | 7.44  | 7.04 | 5.68 | 8.11 | 6.04 |
| 7.52  | 7.02  | 8.08 | 2.16 | 6.05  | 0.57 | 4.22 | 8.24 | 5.48 |
| 7.11  | 7.59  | 7.74 | 5.66 | 5.23  | 6.08 | 5.34 | 7.57 | 5.78 |
| 6.93  | 7.67  | 7.21 | 5.48 | 5.33  | 6.16 | 5.92 | 7.7  | 5.26 |

<https://mc.manuscriptcentral.com/gut>

1  
2  
3  
4  
5  
6  
7  
8  
9  
10  
11  
12  
13  
14  
15  
16  
17  
18  
19  
20  
21  
22  
23  
24  
25  
26  
27  
28  
29  
30  
31  
32  
33  
34  
35  
36  
37  
38  
39  
40  
41  
42  
43  
44  
45  
46  
47  
48  
49  
50  
51  
52  
53  
54  
55  
56  
57  
58  
59  
60

|      |      |      |      |       |      |      |      |      |
|------|------|------|------|-------|------|------|------|------|
| 7.34 | 9.8  | 8.11 | 1.79 | 4.96  | 3.37 | 2.37 | 7.4  | 5.25 |
| 6.71 | 8.25 | 6.23 | 6.88 | 9.89  | 6.27 | 5.74 | 6.8  | 5.27 |
| 5.54 | 7.54 | 6.8  | 6.01 | 8.41  | 5.72 | 4.76 | 6.08 | 4.49 |
| 4.66 | 7.75 | 6.91 | 6.04 | 7.95  | 5.57 | 5.24 | 5.7  | 4.29 |
| 6.51 | 9.47 | 3.55 | 7.55 | 8.88  | 8.25 | 7.58 | 7.28 | 5.88 |
| 8.56 | 6.18 | 7.8  | 5.65 | 9.45  | 1.57 | 3.02 | 7.7  | 5.59 |
| 8.83 | 5.13 | 8.55 | 5.3  | 9.52  | 1.87 | 1.07 | 7.61 | 4.93 |
| 8.78 | 5.16 | 8.45 | 5.6  | 9.81  | 2.67 | 1.35 | 7.17 | 4.78 |
| 7    | 7.76 | 2.27 | 7.01 | 6.44  | 8.62 | 7.25 | 8.24 | 6.89 |
| 7.16 | 7.82 | 6.9  | 6.58 | 7.53  | 7.14 | 6.58 | 7.92 | 6.36 |
| 8.39 | 7.99 | 7.47 | 6.94 | 5.21  | 3.24 | 4.65 | 8.63 | 6.94 |
| 8.64 | 8.34 | 8.08 | 7.16 | 6.96  | 6.28 | 5.89 | 7.83 | 5.98 |
| 8.5  | 9.08 | 8.44 | 6.84 | 6.51  | 1.89 | 4.47 | 8.28 | 6.81 |
| 7.16 | 8.34 | 7.17 | 6.5  | 6.26  | 5.65 | 5.83 | 8.52 | 6.43 |
| 8.3  | 9.98 | 8.5  | 7.75 | 11.63 | 5.87 | 2.54 | 7.87 | 7.35 |
| 5.58 | 7.56 | 6.88 | 7.06 | 6.62  | 4.61 | 3.97 | 8.36 | 6.62 |
| 6.52 | 7.31 | 6.69 | 8.06 | 6.63  | 6.12 | 5.48 | 8.09 | 6.36 |
| 5.18 | 7.68 | 7.29 | 7.07 | 6.61  | 4    | 3.45 | 8.49 | 6.88 |

1  
2  
3  
4  
5  
6  
7  
8  
9  
10  
11  
12  
13  
14  
15  
16  
17  
18  
19  
20  
21  
22  
23  
24  
25  
26  
27  
28  
29  
30  
31  
32  
33  
34  
35  
36  
37  
38  
39  
40  
41  
42  
43  
44  
45  
46  
47  
48  
49  
50  
51  
52  
53  
54  
55  
56  
57  
58  
59  
60

| GJA5 | GLYR1 | GPI   | GPR124 | GPR56 | GPX1  | GREM1 | GRHL2 | GSN   |
|------|-------|-------|--------|-------|-------|-------|-------|-------|
| 6.79 | 7.52  | 8.57  | 5.23   | 8.33  | 8.56  | 7.61  | 7.27  | 9.67  |
| 6.67 | 7.87  | 9.49  | 6.14   | 9.13  | 9.08  | 9.45  | 7.32  | 10.92 |
| 6.59 | 7.78  | 9.4   | 5.61   | 8.86  | 9     | 8.91  | 7.66  | 10.81 |
| 4.76 | 8.18  | 9.78  | 7.8    | 9.81  | 9.6   | 11.7  | 6.99  | 11.75 |
| 9.26 | 7.05  | 8.74  | 3.33   | 7.31  | 8.43  | 7.38  | 8.49  | 7.79  |
| 7.09 | 7.85  | 10.34 | 5.93   | 8.54  | 9.03  | 10.54 | 7.08  | 9.59  |
| 6.81 | 8.04  | 10.2  | 6.05   | 8.6   | 9.29  | 9.18  | 7.28  | 9.88  |
| 4.1  | 7.93  | 10.83 | 7.28   | 9.4   | 10.45 | 10.75 | 7.49  | 10.84 |
| 5.5  | 7.83  | 10.87 | 7.16   | 9.49  | 10.44 | 8.62  | 5.86  | 11.05 |
| 6.49 | 8.28  | 10.3  | 5.66   | 9.26  | 8.79  | 9.59  | 6.9   | 10.28 |
| 3.96 | 8.59  | 10.75 | 6.4    | 9.8   | 9.45  | 10.41 | 6.4   | 10.76 |
| 5.21 | 8.64  | 10.75 | 6.46   | 9.29  | 9.29  | 11.17 | 5.93  | 11.31 |
| 6.54 | 8.41  | 10.05 | 5.45   | 9.26  | 8.81  | 9.18  | 8.44  | 9.9   |
| 6.69 | 8.38  | 10.06 | 6.4    | 9.07  | 9.15  | 9.46  | 8.42  | 9.85  |
| 3.35 | 7.83  | 10.03 | 8.02   | 9.95  | 10.85 | 8.32  | 9.59  | 11.87 |
| 6.47 | 7.81  | 9.47  | 6.67   | 9.16  | 9.37  | 9.63  | 8.01  | 10.46 |
| 6.87 | 8.06  | 9.42  | 6.5    | 9.45  | 9.03  | 10.73 | 8.21  | 10.83 |
| 7.72 | 7.8   | 10.06 | 6.69   | 9.49  | 9.27  | 10.84 | 8.21  | 10.93 |
| 4.85 | 8.21  | 10.18 | 7.64   | 7.87  | 9.17  | 8.88  | 7.41  | 11.32 |
| 5.04 | 8.68  | 10.73 | 6.94   | 7.79  | 9.46  | 11.15 | 7.39  | 11.03 |
| 5.05 | 8.58  | 10.4  | 7.25   | 7.75  | 9.38  | 11.55 | 6.65  | 11.49 |
| 5.61 | 8.66  | 11.72 | 7.42   | 10    | 9.71  | 12.04 | 7.31  | 11.44 |
| 5.01 | 8.88  | 11.82 | 7.7    | 10.16 | 9.8   | 10.65 | 7.59  | 11.3  |
| 4.98 | 8.74  | 11.52 | 7.68   | 9.91  | 9.84  | 12.6  | 7.01  | 11.65 |
| 3.6  | 9.21  | 10.42 | 5.38   | 7.22  | 9.61  | 8.27  | 2.01  | 10.53 |
| 4.71 | 8.78  | 11.51 | 5.86   | 8.7   | 10    | 8.31  | 7.65  | 10.61 |
| 5.11 | 8.71  | 11.52 | 5.65   | 8.95  | 9.84  | 8.24  | 7.8   | 10.76 |
| 6.53 | 8.31  | 10.62 | 5.89   | 8.73  | 9.49  | 8.14  | 7.9   | 10.74 |
| 6.75 | 8.46  | 10.28 | 5.28   | 9.63  | 7.93  | 7.11  | 7.83  | 9.48  |
| 6.69 | 7.92  | 10.1  | 5.9    | 9.31  | 8.55  | 10.39 | 7.89  | 9.97  |
| 6.75 | 8.34  | 10.44 | 5.37   | 10.58 | 8.13  | 10.11 | 7.98  | 10.07 |
| 6.86 | 7.9   | 9.92  | 5.52   | 9.73  | 8.34  | 8.66  | 8.31  | 10.06 |
| 6.95 | 7.75  | 9.14  | 5.41   | 6.49  | 8.29  | 9.39  | 6.64  | 9.64  |
| 5.01 | 8.68  | 10.79 | 7.89   | 10.33 | 9.75  | 11.55 | 6.84  | 11.35 |
| 4.47 | 8.82  | 11.13 | 7.13   | 10.48 | 9.61  | 10.6  | 7.43  | 10.78 |
| 4.56 | 8.42  | 10.77 | 7.47   | 10.21 | 9.68  | 11.07 | 7.51  | 11.39 |
| 0.45 | 7.78  | 9.7   | 5.9    | 7.61  | 9.66  | 8.46  | 5.84  | 9.86  |
| 3.73 | 7.73  | 10.38 | 5.26   | 7.44  | 8.96  | 10.09 | 6.38  | 9.99  |
| 4.17 | 7.39  | 9.67  | 5.72   | 7.6   | 9.05  | 9.95  | 5.45  | 9.63  |
| 3.83 | 7.77  | 9.81  | 5.42   | 7.21  | 9.04  | 9.73  | 5.7   | 9.82  |
| 6.39 | 7.04  | 9.65  | 6.11   | 7.68  | 8.2   | 9.04  | 7.32  | 8.88  |
| 6.61 | 7.26  | 9.83  | 5.29   | 7.95  | 8.44  | 10.21 | 7.52  | 9     |
| 6.33 | 7.33  | 10.01 | 5.12   | 7.61  | 8.24  | 9.21  | 7.64  | 8.71  |
| 5.7  | 7.51  | 10.37 | 5.72   | 8.17  | 8.64  | 9.51  | 7.22  | 9.09  |
| 4.86 | 5.86  | 10.68 | 6.45   | 8.86  | 10.37 | 5.67  | 7.32  | 9.96  |
| 4.12 | 7.99  | 10.81 | 5.9    | 9.33  | 8.28  | 10.44 | 6.99  | 10.28 |
| 3.17 | 7.86  | 10.93 | 6.49   | 9.37  | 8.59  | 10.35 | 6.77  | 10.5  |
| 4.13 | 7.98  | 10.44 | 7.23   | 8.69  | 8.3   | 10.46 | 6.25  | 11.14 |
| 4.96 | 8.97  | 10.3  | 6.97   | 10.1  | 10.61 | 9.19  | 8.2   | 10.63 |
| 4.96 | 9.2   | 10.51 | 6.93   | 10.28 | 10.08 | 10.88 | 7.93  | 10.04 |
| 4.3  | 9.15  | 10.58 | 6.56   | 10.01 | 10.12 | 10.57 | 8.22  | 9.77  |

<https://mc.manuscriptcentral.com/gut>

|    |       |      |       |      |       |       |       |      |       |
|----|-------|------|-------|------|-------|-------|-------|------|-------|
| 1  |       |      |       |      |       |       |       |      |       |
| 2  | 5.29  | 8.99 | 10.37 | 7.08 | 10.24 | 10.34 | 11.5  | 7.9  | 10.51 |
| 3  | 7.32  | 7.78 | 10.83 | 5.49 | 9.99  | 9.4   | 7.17  | 9.09 | 9.88  |
| 4  | 7.11  | 8.02 | 10.27 | 5.86 | 10.34 | 9.36  | 9.56  | 9.25 | 9.68  |
| 5  | 7.01  | 8.05 | 10.49 | 5.71 | 10.32 | 9.54  | 9.47  | 8.99 | 9.7   |
| 6  | 7.2   | 8.07 | 10.3  | 5.67 | 9.98  | 9.35  | 9.92  | 9.08 | 10.19 |
| 7  |       |      |       |      |       |       |       |      |       |
| 8  | 5.04  | 8.92 | 9.98  | 6.42 | 9.39  | 9.6   | 8.78  | 8.04 | 11.67 |
| 9  | 5.46  | 9.08 | 11.01 | 6.15 | 10.54 | 9.7   | 10.19 | 8.18 | 11.98 |
| 10 | 4.49  | 9.22 | 11.01 | 5.51 | 10.59 | 9.43  | 8.47  | 8.62 | 12.45 |
| 11 | 4.96  | 9.2  | 11.59 | 6.86 | 10.45 | 9.56  | 11.65 | 8.03 | 12.08 |
| 12 | 2.58  | 9.14 | 10.83 | 5.36 | 9.79  | 9.4   | 6.03  | 7.9  | 9.87  |
| 13 | 4.71  | 9.28 | 10.29 | 5.63 | 9.59  | 9.4   | 9.69  | 7.61 | 10.38 |
| 14 | 4.06  | 9.33 | 10.42 | 5.21 | 9.61  | 9.38  | 8.75  | 8    | 9.76  |
| 15 | 4.07  | 9.13 | 10.48 | 5.47 | 9.54  | 9.28  | 10.17 | 7.74 | 10.39 |
| 16 |       |      |       |      |       |       |       |      |       |
| 17 | 12.16 | 6.74 | 11.42 | 5.15 | 7.74  | 8.15  | 7.47  | 6.15 | 7.74  |
| 18 | 9.74  | 6.98 | 10.57 | 6    | 8.29  | 9.95  | 9.46  | 7.62 | 9.67  |
| 19 | 8.4   | 7.33 | 10.42 | 5.89 | 8.11  | 9.56  | 9.85  | 7.83 | 9.28  |
| 20 | 10.99 | 5.33 | 9.83  | 1.83 | 8.26  | 8.32  | 8.75  | 8.87 | 8.27  |
| 21 | 10.3  | 5.3  | 9.37  | 2.77 | 7.92  | 7.86  | 8.46  | 8.73 | 8.33  |
| 22 |       |      |       |      |       |       |       |      |       |
| 23 | 6.39  | 8.57 | 10.98 | 5.23 | 10.05 | 8.83  | 6.6   | 8.24 | 8.44  |
| 24 | 6.09  | 8.77 | 11.11 | 4.88 | 10.02 | 8.85  | 6.4   | 8.09 | 8.49  |
| 25 | 6.66  | 8.38 | 10.58 | 4.84 | 9.78  | 8.73  | 9.05  | 8.12 | 8.69  |
| 26 | 5.05  | 9.27 | 10.04 | 7.04 | 10.05 | 9.83  | 11.57 | 7.76 | 11.35 |
| 27 | 5.67  | 8.9  | 9.7   | 6.47 | 9.92  | 9.57  | 11.3  | 7.85 | 11.3  |
| 28 | 7.44  | 8.39 | 8.7   | 6.09 | 9.09  | 9.51  | 10.18 | 8.65 | 11.3  |
| 29 | 5.92  | 9.59 | 10.83 | 6.88 | 9.98  | 9.49  | 10.26 | 7.56 | 11.32 |
| 30 | 5.85  | 9.76 | 10.86 | 6.99 | 9.96  | 9.73  | 11.5  | 7.5  | 11.21 |
| 31 | 5.33  | 9.68 | 11.06 | 7.3  | 9.97  | 9.72  | 11.65 | 7.83 | 11.43 |
| 32 | 6.68  | 8.4  | 10.84 | 5.85 | 8.68  | 9.04  | 10    | 8.19 | 9.49  |
| 33 | 6.37  | 8.21 | 10.96 | 5.84 | 8.71  | 8.82  | 10.73 | 8.13 | 9.32  |
| 34 | 6.4   | 8.05 | 10.88 | 5.64 | 8.51  | 8.98  | 10.48 | 8.1  | 9.25  |
| 35 | 7.22  | 8.49 | 10.02 | 6.75 | 10.42 | 9.64  | 7.17  | 8.43 | 10.92 |
| 36 | 6.94  | 8.51 | 10.73 | 5.62 | 10.35 | 9.79  | 10.16 | 8.47 | 10.04 |
| 37 | 7.37  | 8.33 | 10.5  | 5.61 | 10.13 | 9.65  | 9.16  | 8.62 | 9.91  |
| 38 | 6.73  | 8.23 | 9.78  | 6.21 | 8.86  | 9.89  | 11.5  | 8.19 | 10.32 |
| 39 | 6.92  | 8.27 | 9.95  | 6.14 | 8.56  | 9.73  | 10.76 | 8.21 | 10.1  |
| 40 | 7.32  | 8.2  | 9.78  | 6.58 | 8.77  | 9.99  | 10.79 | 7.94 | 10.54 |
| 41 | 7.22  | 7.68 | 9.09  | 6.14 | 8.2   | 8.87  | 9.61  | 8.02 | 10.55 |
| 42 | 7.22  | 7.68 | 9.09  | 6.14 | 8.2   | 8.87  | 9.61  | 8.02 | 10.55 |
| 43 | 7.4   | 7.98 | 9.84  | 6.38 | 8.5   | 9.03  | 11    | 7.98 | 10.89 |
| 44 | 7.34  | 7.92 | 9.78  | 6.5  | 8.35  | 8.96  | 11.76 | 8.01 | 11.31 |
| 45 | 7.61  | 7.93 | 9.82  | 6.9  | 8.18  | 8.95  | 11.06 | 8.01 | 11.38 |
| 46 | 7.51  | 7.64 | 8.93  | 4.14 | 8.13  | 8.47  | 8.15  | 7.78 | 9.14  |
| 47 | 7.26  | 7.84 | 11.18 | 6.47 | 9.34  | 8.92  | 10.22 | 7.88 | 10.46 |
| 48 | 6.73  | 8.23 | 11.44 | 6.18 | 9.1   | 8.77  | 9.6   | 7.67 | 10.4  |
| 49 | 7.74  | 7.82 | 10.35 | 6.17 | 8.76  | 8.83  | 9.71  | 7.88 | 10.84 |
| 50 | 4.81  | 9.54 | 10.43 | 6.89 | 10.02 | 9.54  | 10.56 | 7.67 | 10.94 |
| 51 | 3.4   | 9.52 | 10.46 | 5.91 | 10.27 | 9.4   | 8.5   | 8.03 | 10.58 |
| 52 | 5.22  | 9.27 | 10.1  | 6.93 | 9.73  | 10.07 | 9.76  | 7.66 | 10.96 |
| 53 | 7.41  | 7.61 | 8.8   | 5.58 | 7.94  | 8.64  | 8.62  | 7.86 | 9.58  |
| 54 | 7.49  | 7.85 | 9.2   | 7.29 | 8.32  | 9.09  | 11.56 | 7.52 | 10.87 |
| 55 | 6.96  | 7.79 | 9.15  | 7.06 | 8.49  | 9.03  | 11.37 | 7.89 | 11.13 |
| 56 | 7.37  | 8.03 | 9.33  | 5.75 | 9.04  | 8.51  | 9.79  | 8.04 | 9.85  |
| 57 |       |      |       |      |       |       |       |      |       |
| 58 |       |      |       |      |       |       |       |      |       |
| 59 |       |      |       |      |       |       |       |      |       |
| 60 |       |      |       |      |       |       |       |      |       |

1  
2  
3  
4  
5  
6  
7  
8  
9  
10  
11  
12  
13  
14  
15  
16  
17  
18  
19  
20  
21  
22  
23  
24  
25  
26  
27  
28  
29  
30  
31  
32  
33  
34  
35  
36  
37  
38  
39  
40  
41  
42  
43  
44  
45  
46  
47  
48  
49  
50  
51  
52  
53  
54  
55  
56  
57  
58  
59  
60

|       |      |       |      |       |       |       |      |       |
|-------|------|-------|------|-------|-------|-------|------|-------|
| 7.16  | 8.07 | 9.66  | 6.14 | 9.49  | 8.51  | 10.31 | 8.01 | 10.13 |
| 8.9   | 6.93 | 8.98  | 6.71 | 9.07  | 8.66  | 9.77  | 8.24 | 10.24 |
| 5.99  | 8.04 | 10.16 | 6.77 | 8.63  | 9     | 8.47  | 6.46 | 10.86 |
| 5.91  | 8.44 | 10.74 | 7.57 | 9.52  | 10.17 | 11.66 | 7.5  | 11.51 |
| 5.88  | 8.35 | 10.57 | 8.23 | 9.18  | 10.08 | 12.14 | 6.76 | 12.13 |
| 5.69  | 8.28 | 9.38  | 7.25 | 7.58  | 9.7   | 9.74  | 7.01 | 11.2  |
| 4.01  | 8.91 | 10.22 | 6.54 | 9.02  | 9.33  | 10.61 | 7.64 | 11.59 |
| 4.66  | 8.93 | 10.15 | 6.56 | 8.85  | 9.53  | 11.07 | 7.48 | 11.63 |
| 5.3   | 7.99 | 9.55  | 8.64 | 9.15  | 11.26 | 10.72 | 8.35 | 12.81 |
| 4.38  | 8.63 | 10.13 | 7.11 | 9.27  | 9.32  | 7.84  | 7.25 | 10.52 |
| 3.95  | 8.92 | 10.91 | 6.04 | 9.51  | 8.66  | 10.24 | 7.35 | 10.02 |
| 6.41  | 8.53 | 10.5  | 5.06 | 8.61  | 8.3   | 9.33  | 7.71 | 8.99  |
| 4.58  | 8.09 | 10.76 | 8.17 | 9.93  | 10.17 | 9.62  | 8.45 | 11.34 |
| 9.3   | 7.08 | 9.22  | 1.2  | 8.26  | 8.32  | 8.28  | 9.84 | 8.26  |
| 5.41  | 7.82 | 10.99 | 5.92 | 10.22 | 9.81  | 9.78  | 7.37 | 9.97  |
| 3.74  | 7.96 | 11.17 | 5.98 | 10.41 | 9.99  | 8.94  | 7.26 | 9.75  |
| 4.33  | 7.81 | 10.96 | 6.01 | 10.24 | 9.77  | 10.49 | 7.23 | 10.09 |
| 5.27  | 8.34 | 10.05 | 6.15 | 8.32  | 8.57  | 10.68 | 6.02 | 10.56 |
| 6.93  | 7.68 | 9.59  | 6    | 8.24  | 8.71  | 10.32 | 7.04 | 10.07 |
| 6.28  | 8.01 | 10.03 | 6.41 | 8.22  | 9.15  | 10.65 | 6.43 | 10.47 |
| 7.75  | 6.16 | 8.86  | 7.49 | 8.62  | 9.56  | 5.16  | 7.75 | 10.59 |
| 3.72  | 8.83 | 10.78 | 5.7  | 9.32  | 8.53  | 7.08  | 5.75 | 9.25  |
| 4.86  | 8.63 | 10.37 | 6.51 | 9.16  | 8.77  | 10.05 | 5.93 | 10.12 |
| 3.18  | 7.7  | 9.8   | 7.7  | 10.25 | 8.09  | 10.31 | 7.31 | 11.18 |
| 3.49  | 7.52 | 9.83  | 8.27 | 10.3  | 8.97  | 9.93  | 7.41 | 11.51 |
| 4.71  | 7.87 | 9.89  | 8.23 | 9.6   | 9.26  | 9.77  | 6.16 | 11.72 |
| 8.31  | 6.32 | 7.99  | 4    | 8.01  | 8.56  | 7.71  | 8.53 | 8.15  |
| 8.17  | 6.56 | 7.87  | 2.86 | 7.68  | 8.06  | 7.81  | 8.65 | 7.43  |
| 7.85  | 6.16 | 7.65  | 1.77 | 7.74  | 7.85  | 7.79  | 8.55 | 6.57  |
| 3.82  | 7.39 | 9.3   | 6.65 | 9.03  | 8.25  | 7.48  | 6.33 | 10.88 |
| 4.35  | 5.55 | 9.41  | 7.47 | 8.7   | 8.64  | 11.97 | 5.93 | 11.33 |
| 4.02  | 7.37 | 9.94  | 6.82 | 9.21  | 8.46  | 11.06 | 7.12 | 10.77 |
| 4.4   | 7.33 | 9.38  | 7.38 | 8.41  | 8.56  | 9.67  | 5.44 | 11.76 |
| 7.7   | 5.81 | 8.09  | 3.45 | 6.88  | 7.69  | 7.05  | 7.39 | 7.89  |
| 6.79  | 6.08 | 7.78  | 3.42 | 7.3   | 7.74  | 6.32  | 7.75 | 7.84  |
| 6.76  | 6.33 | 8.65  | 4.39 | 7.61  | 7.63  | 6.27  | 7.57 | 8.34  |
| 8.75  | 5.47 | 8.47  | 0    | 6.85  | 7.22  | 7.63  | 7.68 | 7.11  |
| 6.79  | 6.38 | 7.14  | 3.92 | 7.14  | 7.29  | 6.83  | 7.96 | 7.09  |
| 7.33  | 6.49 | 7.07  | 3.1  | 7.27  | 7.47  | 6.77  | 7.29 | 6.74  |
| 7.02  | 6.44 | 7.43  | 2.89 | 7.29  | 7.53  | 6.7   | 7.59 | 7.42  |
| 11.41 | 2.41 | 8.82  | 2.41 | 5.73  | 4.41  | 9.01  | 4.73 | 7.5   |
| 8.24  | 6.41 | 8.22  | 3.06 | 7.94  | 8.56  | 7.86  | 8.71 | 8.02  |
| 8.47  | 7.16 | 9.07  | 1.65 | 8.03  | 8.57  | 8.14  | 8.89 | 7.85  |
| 7.41  | 6.57 | 9.8   | 5.04 | 8.52  | 8.82  | 6.57  | 7.99 | 9.33  |
| 8.31  | 6.48 | 8.82  | 3.56 | 7.84  | 8.23  | 7.86  | 8.33 | 7.97  |
| 7.81  | 6.95 | 8.9   | 5.78 | 8.87  | 8.71  | 8.17  | 7.56 | 9.22  |
| 8.5   | 7.05 | 8.27  | 3.3  | 8.26  | 8.43  | 8.04  | 8.57 | 8.01  |
| 8.68  | 7.08 | 8.21  | 3.03 | 7.8   | 8.14  | 7.67  | 8.45 | 7.53  |
| 9.4   | 6.76 | 8.75  | 4.22 | 7.91  | 8.16  | 8.83  | 8.12 | 8.06  |
| 6.54  | 8.3  | 9.52  | 4.82 | 7.74  | 8.24  | 8.21  | 9.02 | 9.33  |
| 6.86  | 7.94 | 9.68  | 5.47 | 8.02  | 8.74  | 9.18  | 8.7  | 9.49  |
| 6.61  | 8.07 | 9.53  | 5.04 | 7.88  | 8.71  | 9.33  | 8.71 | 9.44  |

<https://mc.manuscriptcentral.com/gut>

|    |      |      |       |      |       |       |       |      |       |
|----|------|------|-------|------|-------|-------|-------|------|-------|
| 1  |      |      |       |      |       |       |       |      |       |
| 2  | 7.1  | 8.16 | 9.29  | 4.44 | 7.77  | 8.38  | 8.55  | 8.79 | 9.74  |
| 3  | 7.12 | 8.27 | 9.89  | 6.76 | 9.41  | 10.45 | 9.82  | 8.04 | 10.47 |
| 4  | 7.22 | 8.21 | 10.04 | 6.61 | 9.46  | 10.01 | 11.2  | 8.21 | 11.32 |
| 5  | 6.93 | 8.19 | 9.51  | 5.44 | 9.28  | 9.51  | 9.32  | 8.48 | 10.15 |
| 6  | 7.36 | 8    | 9.57  | 5.62 | 9.34  | 9.61  | 9.29  | 8.49 | 10.14 |
| 7  | 7.33 | 8.06 | 11.38 | 6.56 | 9.2   | 9.36  | 9.11  | 7.84 | 10.73 |
| 8  | 5.84 | 8.33 | 12.33 | 7.05 | 9.69  | 10.04 | 11.22 | 8.28 | 11.53 |
| 9  | 4.98 | 8.57 | 11    | 6.72 | 9.53  | 9.8   | 11.41 | 7.6  | 10.87 |
| 10 | 5.33 | 8.44 | 10.93 | 8.2  | 9.17  | 10.32 | 11.28 | 7.51 | 12.74 |
| 11 | 5.41 | 8.87 | 11.65 | 7.81 | 10.33 | 9.82  | 8.88  | 8.26 | 11.64 |
| 12 | 6.43 | 9.11 | 10.76 | 7.51 | 10.01 | 10.18 | 11.88 | 7.66 | 11.47 |
| 13 | 6.14 | 9.03 | 10.39 | 7.55 | 10.06 | 10.22 | 11.61 | 7.93 | 11.57 |
| 14 | 5.68 | 8.99 | 11.17 | 7.43 | 10.11 | 9.85  | 12.01 | 7.74 | 11.73 |
| 15 | 6.02 | 8.38 | 9.72  | 6.05 | 9.78  | 9.46  | 8.15  | 7.45 | 10.03 |
| 16 | 4.46 | 8.98 | 10.48 | 6.5  | 10.6  | 9.81  | 10.14 | 7.04 | 10.61 |
| 17 | 6.19 | 7.88 | 9.4   | 7.64 | 9.89  | 9.96  | 11.14 | 7.42 | 11.38 |
| 18 | 5    | 8.16 | 10.03 | 7.01 | 7.86  | 9.68  | 9.08  | 5.52 | 10.98 |
| 19 | 5.13 | 8.33 | 10.77 | 7.24 | 9.05  | 9.55  | 11.4  | 7.72 | 10.88 |
| 20 | 5.61 | 8.17 | 10.35 | 7.49 | 8.62  | 9.68  | 12.23 | 6.56 | 11.56 |
| 21 | 4.25 | 8.6  | 10.18 | 6.37 | 10.09 | 9.66  | 8.63  | 7.71 | 11.28 |
| 22 | 4.79 | 8.05 | 11.26 | 6.89 | 9.48  | 9.56  | 10.1  | 7.07 | 9.91  |
| 23 | 3.73 | 8.34 | 11.22 | 5.89 | 10.11 | 9.16  | 8.93  | 7.35 | 9.49  |
| 24 | 6.06 | 7.6  | 10.19 | 7.04 | 10.15 | 9.23  | 10.23 | 7.46 | 10.75 |
| 25 | 5.88 | 8.22 | 10.14 | 6.63 | 10.45 | 9.3   | 10.02 | 7.51 | 10.61 |
| 26 | 6.74 | 7.4  | 10.18 | 9.32 | 10.79 | 10.74 | 10.12 | 7.47 | 12.78 |
| 27 | 2.36 | 7.46 | 9.29  | 5.06 | 7.41  | 8.01  | 8.43  | 4.75 | 9.79  |
| 28 | 5.79 | 7.6  | 9.05  | 6.18 | 7.97  | 7.97  | 10.74 | 6.04 | 9.82  |
| 29 | 5.05 | 7.52 | 10.01 | 5.55 | 8.14  | 7.86  | 8.82  | 6.12 | 9.15  |
| 30 | 4.9  | 8.26 | 8.45  | 5.36 | 8.03  | 8.63  | 11.22 | 4.22 | 10.71 |
| 31 | 7.15 | 6.57 | 7.54  | 3.34 | 7.04  | 7.12  | 7.34  | 7.71 | 6.4   |
| 32 | 6.87 | 6.33 | 8.58  | 4.18 | 6.72  | 7.87  | 7.58  | 7.42 | 7.99  |
| 33 | 7.5  | 6.41 | 7.87  | 2.47 | 6.91  | 7.79  | 7.73  | 7.57 | 6.79  |
| 34 | 7.33 | 6.42 | 8.19  | 1.96 | 7.11  | 7.8   | 7.4   | 7.43 | 7.13  |
| 35 | 5.63 | 7.43 | 8.8   | 4.11 | 8.72  | 8.46  | 7.58  | 6.05 | 8.05  |
| 36 | 6.37 | 7.01 | 8.14  | 4.61 | 8.12  | 7.82  | 9.63  | 6.54 | 8.55  |
| 37 | 6.32 | 7.08 | 7.93  | 5.23 | 8.28  | 8.13  | 10.39 | 6.56 | 8.95  |
| 38 | 6.14 | 6.77 | 8.06  | 5.59 | 7.75  | 8.31  | 9.92  | 6.52 | 9.31  |
| 39 | 4.05 | 8.13 | 9.42  | 5.81 | 5.4   | 8.94  | 7.63  | 0.35 | 9.53  |
| 40 | 6.16 | 6.75 | 9.85  | 6.85 | 9.52  | 8.86  | 10.43 | 7.63 | 10.43 |
| 41 | 3.42 | 8.4  | 10.7  | 6.23 | 9.85  | 9.68  | 8.19  | 7.64 | 11.29 |
| 42 | 5.55 | 7.63 | 10.05 | 7.82 | 9.67  | 10.84 | 9.23  | 8.97 | 11.49 |
| 43 | 7.23 | 7.24 | 10.42 | 5.61 | 8.72  | 9.04  | 8.36  | 8.07 | 10.09 |
| 44 | 4.51 | 7.32 | 9.32  | 7.83 | 8.68  | 10.83 | 8.6   | 7.83 | 11.42 |
| 45 | 5    | 7.68 | 10.79 | 7.24 | 8.81  | 9.69  | 11.73 | 7.71 | 10.61 |
| 46 | 4.79 | 7.66 | 10.6  | 6.89 | 8.76  | 9.71  | 11.76 | 7.48 | 11    |
| 47 | 3    | 6.99 | 11.3  | 5.27 | 9.5   | 9.5   | 2.68  | 7.56 | 9.9   |
| 48 | 6.48 | 7.2  | 10.79 | 6.11 | 8.68  | 9.97  | 10.08 | 6.94 | 10.92 |
| 49 | 4.52 | 7.32 | 11.29 | 5.63 | 9.14  | 9.85  | 10.53 | 6.86 | 10.99 |
| 50 | 6.45 | 7.49 | 10.64 | 5.3  | 8.33  | 9.62  | 10.46 | 7.41 | 10.75 |
| 51 | 3.16 | 7.07 | 11.24 | 5.95 | 7.74  | 9.1   | 8.89  | 5.98 | 9.44  |
| 52 | 5.34 | 6.48 | 10.09 | 5.95 | 7.35  | 7.86  | 10.77 | 6.55 | 9.69  |
| 53 | 5.51 | 6.48 | 9.95  | 5.45 | 7.35  | 7.87  | 10.7  | 6.73 | 9.55  |

<https://mc.manuscriptcentral.com/gut>

|      |      |       |      |      |       |       |      |       |
|------|------|-------|------|------|-------|-------|------|-------|
| 3.6  | 6.88 | 10.5  | 6.92 | 7.85 | 8.59  | 9.88  | 6.6  | 11.13 |
| 6.39 | 6.74 | 10.7  | 7.51 | 7.76 | 8.77  | 6.74  | 6.27 | 10.28 |
| 5.54 | 7.01 | 10.62 | 6.26 | 9.09 | 6.96  | 9.54  | 6.91 | 9.02  |
| 5.35 | 7.27 | 10.66 | 6.44 | 9.31 | 6.32  | 8.75  | 6.6  | 9.36  |
| 7.36 | 4.72 | 8.34  | 5.88 | 7.91 | 7.58  | 7.41  | 8.01 | 8.59  |
| 4.69 | 7.2  | 11    | 5.42 | 7.79 | 8.62  | 8.25  | 6.42 | 9.66  |
| 4.46 | 7.56 | 10.86 | 3.87 | 8.27 | 8.73  | 7.54  | 6.77 | 8.57  |
| 4.67 | 7.48 | 10.79 | 4.31 | 8.48 | 8.8   | 7.62  | 7.06 | 8.45  |
| 7.56 | 5.97 | 7.6   | 2.27 | 7.2  | 7.6   | 7.44  | 8.12 | 6.65  |
| 6.74 | 6.75 | 8.36  | 5.36 | 7.58 | 8.16  | 9.68  | 7.48 | 9.18  |
| 5.11 | 7.62 | 9.18  | 6.77 | 8.7  | 8.75  | 7.92  | 6.24 | 10.55 |
| 5.06 | 7.81 | 9.4   | 6.64 | 8.65 | 8.69  | 11.15 | 7.04 | 10.6  |
| 5.83 | 7.83 | 9.49  | 7.17 | 8.89 | 8.74  | 11.03 | 6.45 | 11.27 |
| 5.96 | 7.68 | 9.35  | 6.92 | 8.06 | 8.95  | 9.55  | 6.52 | 11.46 |
| 6.71 | 6.87 | 9.05  | 7.4  | 8.75 | 10.79 | 6.79  | 8.69 | 11.21 |
| 6.5  | 7.8  | 10.14 | 4.97 | 8.02 | 8.3   | 9.55  | 6.95 | 10    |
| 6.69 | 7.52 | 9.53  | 4.63 | 7.75 | 7.93  | 9.52  | 6.8  | 9.41  |
| 6.71 | 7.67 | 10.17 | 4.84 | 8.09 | 8.69  | 9.25  | 7.47 | 10.24 |



1  
2  
3  
4  
5  
6  
7  
8  
9  
10  
11  
12  
13  
14  
15  
16  
17  
18  
19  
20  
21  
22  
23  
24  
25  
26  
27  
28  
29  
30  
31  
32  
33  
34  
35  
36  
37  
38  
39  
40  
41  
42  
43  
44  
45  
46  
47  
48  
49  
50  
51  
52  
53  
54  
55  
56  
57  
58  
59  
60

| GTF2I | GZMK  | HAPLN1 | HAS1 | HDAC5 | HDHD3 | HEG1 | HGF  | HIF1A |
|-------|-------|--------|------|-------|-------|------|------|-------|
| 9.24  | 8.04  | 2.37   | 6.66 | 8.23  | 7.62  | 8.24 | 6.73 | 9.55  |
| 9.86  | 6.06  | 6.75   | 5.88 | 8.18  | 9.47  | 8.52 | 7.1  | 10.02 |
| 9.64  | 6.67  | 6.15   | 5.97 | 8.25  | 8.93  | 8.26 | 7.03 | 9.77  |
| 10.34 | 6.09  | 6.27   | 6.35 | 8.87  | 9.62  | 9.2  | 7.31 | 10.78 |
| 3.33  | 8.25  | 1.01   | 7.94 | 8.97  | 7.55  | 9.05 | 7.93 | 8.73  |
| 9.37  | 7.27  | 3.88   | 6.06 | 7.85  | 7.98  | 8.3  | 6.85 | 9.99  |
| 9.48  | 6.98  | 4.56   | 6.49 | 7.63  | 8.03  | 8.37 | 7.14 | 10.56 |
| 9.83  | 7.04  | 4.3    | 4.79 | 8.65  | 8.73  | 8.39 | 5.56 | 10.44 |
| 10.04 | 7.51  | 3.37   | 5.61 | 8.09  | 9.6   | 8.62 | 6.74 | 10.48 |
| 10.44 | 5.64  | 0.91   | 5.74 | 7.64  | 9.61  | 8    | 6.42 | 9.93  |
| 10.62 | 5.77  | 4.19   | 4.77 | 7.59  | 9.84  | 7.97 | 5.9  | 10.68 |
| 10.84 | 5.73  | 0.68   | 6    | 7.9   | 9.8   | 8.76 | 6.17 | 11.06 |
| 10.05 | 6.53  | 5.16   | 6.36 | 8.35  | 9.85  | 7.96 | 7.14 | 9.43  |
| 10.16 | 7.27  | 1.67   | 6.85 | 8.27  | 9.15  | 8.82 | 7.71 | 9.99  |
| 10.4  | 8.71  | 1.77   | 6.58 | 9.93  | 8.61  | 8.78 | 6.29 | 9.42  |
| 9.66  | 7.64  | 1.94   | 7.28 | 8.56  | 7.94  | 8.44 | 6.94 | 10.41 |
| 10.16 | 7.15  | 4.61   | 6.1  | 8.97  | 8.27  | 8.42 | 7.12 | 10.09 |
| 9.9   | 6.95  | 2.76   | 7.03 | 9.22  | 7.76  | 8.77 | 7.22 | 10.05 |
| 10.57 | 10.2  | 3.07   | 6.95 | 8.95  | 9.76  | 8.98 | 6.13 | 10.39 |
| 11.05 | 8.84  | 6.13   | 4.4  | 7.81  | 9.5   | 9.03 | 6.92 | 10.66 |
| 10.83 | 10.08 | 3.89   | 6.66 | 8.33  | 9.04  | 9.5  | 6.54 | 10.67 |
| 10.61 | 5.06  | 5.1    | 5.06 | 8.72  | 9.05  | 9.07 | 7.88 | 10.52 |
| 10.71 | 5.24  | 5.37   | 4.01 | 8.76  | 9.03  | 8.8  | 7.74 | 10.51 |
| 10.61 | 4.98  | 5.06   | 3.8  | 8.77  | 8.67  | 9.19 | 7.25 | 10.54 |
| 10.36 | 7.73  | 4.89   | 3.89 | 8.28  | 8.13  | 7.47 | 4.82 | 10.41 |
| 10.06 | 3.83  | 6.77   | 3.13 | 7.22  | 9.73  | 7.98 | 6.17 | 10.36 |
| 9.91  | 4.11  | 6.38   | 3.33 | 7.39  | 9.64  | 7.81 | 6.38 | 10.2  |
| 9.7   | 6.2   | 6.26   | 5.98 | 8     | 9.24  | 8.28 | 6.5  | 10.24 |
| 10.17 | 6.99  | 1.7    | 6.37 | 8.13  | 9.53  | 7.77 | 6.19 | 8.4   |
| 9.82  | 7.08  | 1.36   | 6.75 | 8.45  | 9.18  | 8.31 | 7.18 | 9.55  |
| 10.2  | 6.42  | 2.52   | 6.48 | 8.44  | 9.47  | 8.01 | 6.17 | 9.16  |
| 9.33  | 7.44  | 0.71   | 7.13 | 8.85  | 9.17  | 8.16 | 7.38 | 8.76  |
| 9.43  | 8.29  | 0.93   | 7.13 | 8.33  | 7.02  | 8.51 | 6.92 | 10.28 |
| 10.22 | 5.34  | 2.06   | 3.64 | 8.45  | 9.22  | 9.19 | 7.13 | 10.68 |
| 10.23 | 5.44  | 6.37   | 4.42 | 8.11  | 9.64  | 8.57 | 7.09 | 10.76 |
| 10.14 | 6.11  | 4.38   | 4.38 | 8.54  | 9.42  | 8.78 | 6.7  | 10.62 |
| 9.32  | 9.4   | 0.45   | 4.97 | 7.92  | 7.43  | 8.17 | 4.69 | 9.72  |
| 9.71  | 8.69  | 2.4    | 3.57 | 7.06  | 7.75  | 8.06 | 5.86 | 10.79 |
| 9.54  | 9.51  | 1.37   | 4.45 | 7.92  | 7.16  | 8.34 | 6.3  | 10.29 |
| 9.54  | 9.87  | 0      | 3.55 | 7.33  | 7.27  | 8.36 | 6.14 | 9.97  |
| 8.89  | 7.23  | 2.51   | 6.55 | 7.95  | 7.56  | 8.14 | 6.84 | 9.37  |
| 9.09  | 6.53  | 2.48   | 6.29 | 8.11  | 7.62  | 7.94 | 6.72 | 9.06  |
| 8.94  | 6.54  | 2.22   | 6.05 | 7.47  | 7.51  | 7.93 | 6.85 | 8.93  |
| 9.59  | 6.29  | 3.27   | 5.86 | 7.7   | 8.35  | 7.7  | 6.04 | 9.1   |
| 8.35  | 3.86  | 2.86   | 6.18 | 10.82 | 8.93  | 6.86 | 4.86 | 7.9   |
| 10.08 | 5.64  | 5.52   | 3.48 | 7.85  | 8.6   | 8.06 | 6.76 | 9.61  |
| 9.88  | 6.13  | 3      | 4.39 | 8.01  | 8.35  | 8.42 | 6.94 | 9.93  |
| 9.8   | 6.04  | 2.62   | 4.56 | 8.13  | 8.01  | 8.87 | 7.6  | 10.02 |
| 10.68 | 7.9   | 5.22   | 6.63 | 10.1  | 9.51  | 9    | 6.9  | 10.59 |
| 10.97 | 4.96  | 3.71   | 5.59 | 9.29  | 9.11  | 8.97 | 6.01 | 11.27 |
| 10.85 | 6.43  | 5.08   | 2.5  | 9.34  | 9.2   | 8.15 | 5.85 | 10.85 |

<https://mc.manuscriptcentral.com/gut>

1  
2  
3  
4  
5  
6  
7  
8  
9  
10  
11  
12  
13  
14  
15  
16  
17  
18  
19  
20  
21  
22  
23  
24  
25  
26  
27  
28  
29  
30  
31  
32  
33  
34  
35  
36  
37  
38  
39  
40  
41  
42  
43  
44  
45  
46  
47  
48  
49  
50  
51  
52  
53  
54  
55  
56  
57  
58  
59  
60

|       |      |      |      |       |       |       |      |       |
|-------|------|------|------|-------|-------|-------|------|-------|
| 10.84 | 6.97 | 4.89 | 5.63 | 9.04  | 8.99  | 9.33  | 6.12 | 11.14 |
| 10.56 | 6.63 | 1.03 | 7.04 | 8.13  | 9.93  | 8.05  | 6.57 | 9.31  |
| 10.71 | 5.86 | 5.14 | 6.63 | 8.3   | 9.45  | 8.24  | 7.47 | 9.92  |
| 10.7  | 5.54 | 5.95 | 6.12 | 8.21  | 9.5   | 7.88  | 7.17 | 9.94  |
| 10.51 | 6.63 | 5.36 | 6.61 | 8.14  | 9.36  | 8.29  | 6.91 | 9.44  |
| 10.95 | 8.26 | 1.23 | 5.9  | 8     | 9.84  | 8.59  | 5.52 | 9.92  |
| 11.35 | 6.71 | 5.33 | 4.15 | 8.28  | 10.05 | 8.07  | 6.61 | 10.36 |
| 11.42 | 4.73 | 3.7  | 3.65 | 8.03  | 10.67 | 7.12  | 5.32 | 9.96  |
| 11.65 | 6.83 | 4.14 | 3.44 | 8.52  | 10.34 | 8.16  | 6.86 | 10.3  |
| 10.06 | 6.85 | 5.14 | 3.9  | 8.58  | 9.37  | 7.65  | 5.31 | 10.09 |
| 10.16 | 6.73 | 5.13 | 2.54 | 8.11  | 9.08  | 8.17  | 6.19 | 10.64 |
| 10.11 | 5.79 | 4.14 | 2.99 | 8.08  | 8.79  | 7.76  | 6.17 | 10.53 |
| 10.11 | 6.56 | 3.98 | 0    | 8.52  | 8.96  | 7.94  | 6.4  | 10.29 |
| 7.74  | 7.15 | 6.15 | 9.24 | 12.23 | 7.96  | 10.51 | 5.15 | 10.79 |
| 8.61  | 7.42 | 3.37 | 8.37 | 9.64  | 8.34  | 9.3   | 7.33 | 10.22 |
| 8.9   | 7.66 | 4.52 | 7.49 | 8.74  | 7.82  | 8.76  | 7.3  | 9.66  |
| 5     | 8.84 | 0.24 | 9.95 | 10.53 | 8.3   | 10.6  | 9.37 | 10.62 |
| 4.23  | 8.43 | 0.77 | 9.48 | 10.62 | 8.52  | 10.02 | 9.03 | 10.34 |
| 10.82 | 6.07 | 4.39 | 6.05 | 7.63  | 8.92  | 7.45  | 6.85 | 10.14 |
| 10.85 | 6.18 | 4.55 | 5.9  | 7.49  | 9.25  | 7.21  | 6.68 | 10.09 |
| 10.75 | 6.91 | 3.99 | 6.57 | 7.9   | 9.12  | 7.94  | 6.57 | 9.92  |
| 10.76 | 6.21 | 3.62 | 5.97 | 8.9   | 10.2  | 8.96  | 7.52 | 10.65 |
| 10.71 | 6.03 | 3.45 | 5.41 | 8.8   | 10.19 | 8.68  | 7.57 | 10.31 |
| 10.12 | 7.18 | 2.05 | 7.03 | 8.66  | 9.64  | 8.68  | 8.48 | 9.68  |
| 11.3  | 7.25 | 6.13 | 5.16 | 8.18  | 9.83  | 8.78  | 7.67 | 11.3  |
| 11.48 | 6.63 | 6.02 | 4.85 | 8.42  | 9.91  | 9.19  | 7.56 | 11.5  |
| 11.49 | 7.7  | 6.33 | 4.5  | 8.41  | 9.99  | 9.28  | 7.4  | 11.34 |
| 9.96  | 6.73 | 2.94 | 6.11 | 8.27  | 7.85  | 7.88  | 6.87 | 10.56 |
| 10.15 | 6.68 | 3.15 | 6.02 | 8.22  | 7.38  | 8.24  | 6.8  | 10.64 |
| 9.99  | 7.53 | 1.74 | 6.32 | 8.47  | 7.39  | 8.14  | 7.04 | 10.33 |
| 10.58 | 7.66 | 1.7  | 8.25 | 8.62  | 9.2   | 8.59  | 8.43 | 10.05 |
| 10.41 | 7.24 | 5.33 | 6.35 | 8.15  | 9.53  | 8.14  | 7.36 | 9.54  |
| 10.39 | 7.37 | 5.2  | 6.84 | 8.64  | 9.6   | 8.05  | 7.32 | 9.4   |
| 9.98  | 6.84 | 1.73 | 6.27 | 8.41  | 7.74  | 8.5   | 7.28 | 9.74  |
| 9.59  | 6.9  | 1.46 | 6.46 | 8.31  | 7.97  | 8.13  | 7.46 | 10.27 |
| 9.64  | 7.4  | 2.73 | 6.99 | 8.43  | 7.45  | 8.92  | 6.99 | 10.49 |
| 9.08  | 7.98 | 2.02 | 7.18 | 8.57  | 7.74  | 9.04  | 7.27 | 10.14 |
| 9.08  | 7.98 | 2.02 | 7.18 | 8.57  | 7.74  | 9.04  | 7.27 | 10.14 |
| 8.82  | 6.99 | 2.73 | 6.61 | 9.15  | 7.92  | 8.55  | 7.29 | 10.18 |
| 8.96  | 7.22 | 3.98 | 7.32 | 8.82  | 8.1   | 8.77  | 7.53 | 10.14 |
| 9.26  | 7.19 | 2.27 | 6.98 | 8.96  | 7.61  | 9.46  | 7.54 | 10.3  |
| 8.63  | 8.59 | 3.36 | 7.08 | 8.23  | 7.92  | 8.29  | 7.64 | 9.4   |
| 9.89  | 7.33 | 3.62 | 6.9  | 8.57  | 8.91  | 9.45  | 7.96 | 10.35 |
| 10.04 | 6.89 | 4.27 | 5.9  | 8.23  | 9.57  | 9.84  | 7.55 | 10.23 |
| 9.15  | 7.92 | 3.42 | 6.78 | 8.49  | 8.66  | 9.38  | 7.81 | 9.47  |
| 10.06 | 6.07 | 3.31 | 3.43 | 8.57  | 10.33 | 8.21  | 6.65 | 10.74 |
| 9.97  | 3.08 | 2.88 | 2.66 | 8.49  | 10.45 | 7.58  | 6.47 | 10.48 |
| 9.68  | 6.25 | 3.52 | 3.69 | 9.41  | 10.21 | 8.02  | 5.73 | 10.83 |
| 8.63  | 7.96 | 0.15 | 7.43 | 8.09  | 7.3   | 8.55  | 7.59 | 9.24  |
| 8.83  | 7.26 | 2.02 | 6.72 | 8.42  | 7.23  | 8.93  | 7.79 | 9.87  |
| 9.05  | 7.28 | 0.46 | 6.78 | 8.43  | 6.92  | 8.5   | 7.72 | 9.16  |
| 9.2   | 7.32 | 3.86 | 6.61 | 8.59  | 8.43  | 8.3   | 7.36 | 9.35  |

<https://mc.manuscriptcentral.com/gut>

1  
2  
3  
4  
5  
6  
7  
8  
9  
10  
11  
12  
13  
14  
15  
16  
17  
18  
19  
20  
21  
22  
23  
24  
25  
26  
27  
28  
29  
30  
31  
32  
33  
34  
35  
36  
37  
38  
39  
40  
41  
42  
43  
44  
45  
46  
47  
48  
49  
50  
51  
52  
53  
54  
55  
56  
57  
58  
59  
60

|       |      |      |      |       |       |      |      |       |
|-------|------|------|------|-------|-------|------|------|-------|
| 9.4   | 6.93 | 3.8  | 6.5  | 8.43  | 8.34  | 8.45 | 7.22 | 9.87  |
| 7.81  | 7.97 | 3.1  | 7.99 | 9.18  | 8.08  | 9.18 | 8.2  | 9.18  |
| 9.89  | 8.7  | 1.25 | 7.01 | 8.21  | 7.78  | 8.89 | 6.37 | 10.35 |
| 10.24 | 6.42 | 4.4  | 5.75 | 8.51  | 8.69  | 9.38 | 7.31 | 11.3  |
| 10.27 | 6.1  | 3.08 | 5.53 | 8.85  | 8.77  | 9.91 | 8.22 | 10.78 |
| 9.53  | 9.14 | 3.21 | 6.75 | 8.69  | 8.43  | 8.97 | 5.99 | 10.06 |
| 10.26 | 5.22 | 3.87 | 3.55 | 7.93  | 8.46  | 8.14 | 6.15 | 10.48 |
| 10.28 | 5.34 | 2.93 | 4.15 | 7.72  | 8.52  | 8.37 | 6.4  | 10.61 |
| 9.54  | 7.95 | 4.49 | 4.82 | 10.45 | 8.54  | 8.4  | 5.82 | 9.4   |
| 10.58 | 7.8  | 3.11 | 4.38 | 8.68  | 10.26 | 8.26 | 5.18 | 10.04 |
| 10.57 | 6.19 | 4.08 | 3.95 | 8.15  | 9.93  | 7.97 | 5.85 | 10.5  |
| 9.87  | 6.63 | 4.06 | 6.51 | 7.69  | 9.4   | 7.71 | 6.81 | 9.7   |
| 10.07 | 7.17 | 4.58 | 4.85 | 10.08 | 10.19 | 8.12 | 3.85 | 9.64  |
| 3.59  | 7.83 | 0.79 | 7.89 | 9.47  | 8.49  | 9.72 | 8.21 | 9.07  |
| 9.89  | 2.75 | 2.53 | 4.53 | 7.64  | 8.97  | 7.94 | 5.19 | 9.88  |
| 10.01 | 3.64 | 3.54 | 3.16 | 7.26  | 8.77  | 7.49 | 6.06 | 10.16 |
| 10.01 | 4.04 | 2.69 | 3.22 | 7.67  | 8.8   | 7.62 | 5.71 | 9.76  |
| 10.8  | 7.84 | 5.68 | 3.02 | 7.33  | 8.31  | 8.15 | 5.94 | 10.6  |
| 10.18 | 7.64 | 3.72 | 6.4  | 7.83  | 7.24  | 8.3  | 6.64 | 9.62  |
| 10.41 | 7.72 | 4.04 | 6.58 | 7.74  | 7.24  | 8.44 | 6.41 | 10.27 |
| 6.75  | 6.16 | 5.16 | 7.75 | 11.52 | 7.16  | 7.49 | 6.16 | 8.33  |
| 10    | 5.04 | 5.18 | 3.99 | 6.91  | 8.31  | 7.37 | 5.86 | 10.33 |
| 9.91  | 6.96 | 5.18 | 3.71 | 7.47  | 8.34  | 7.88 | 6.42 | 10.24 |
| 9.52  | 5.77 | 4.18 | 2.77 | 8.97  | 8.87  | 7.81 | 5.5  | 9.24  |
| 9.41  | 7.06 | 2.91 | 3.49 | 9.41  | 8.8   | 8.14 | 5.91 | 9.21  |
| 9.92  | 7.37 | 2.13 | 6.95 | 8.73  | 8.33  | 9.44 | 6.97 | 10.12 |
| 5.95  | 8.13 | 2    | 7.39 | 8.5   | 7.55  | 8.46 | 7.97 | 8.51  |
| 4.03  | 7.82 | 0.86 | 7.92 | 8.49  | 7.35  | 8.3  | 7.89 | 8.52  |
| 4.35  | 8.28 | 2.77 | 8    | 8.65  | 7.47  | 8.4  | 7.7  | 8.55  |
| 9.47  | 6.75 | 1.01 | 6.08 | 7.4   | 8.51  | 8.19 | 6.65 | 9.65  |
| 9.37  | 5.88 | 2.18 | 4.4  | 7.67  | 8.16  | 9.07 | 6.93 | 10.19 |
| 9.31  | 5.47 | 3.81 | 4.36 | 7.94  | 8.82  | 8.05 | 6.34 | 10.15 |
| 9     | 6.68 | 1.74 | 7.64 | 7.77  | 7.75  | 9.18 | 7.25 | 10.41 |
| 5.04  | 7.48 | 0.45 | 7.31 | 8.24  | 6.79  | 7.59 | 7.32 | 8.02  |
| 5.46  | 7.16 | 0.25 | 6.57 | 7.5   | 7.03  | 7.47 | 7.22 | 7.53  |
| 6.97  | 7.02 | 0    | 6.3  | 7.45  | 7.14  | 7.17 | 6.94 | 7.24  |
| 2.32  | 7.53 | 0.32 | 7.77 | 8.78  | 7.11  | 8.92 | 8.11 | 8.94  |
| 4.14  | 7.12 | 1.34 | 6.69 | 7.51  | 6.69  | 7.34 | 7.12 | 7.54  |
| 2.68  | 7.29 | 2.1  | 6.93 | 7.59  | 6.62  | 6.9  | 7.35 | 7.42  |
| 4.01  | 7.3  | 1.89 | 6.59 | 7.35  | 6.38  | 7.06 | 7.48 | 7.57  |
| 3.41  | 5    | 2.41 | 8.48 | 10.18 | 7.97  | 9.56 | 7.54 | 10.77 |
| 6.01  | 8.3  | 2.06 | 7.81 | 8.67  | 7.61  | 8.4  | 8.26 | 8.49  |
| 2.65  | 8.59 | 0    | 8.68 | 8.93  | 7.71  | 8.74 | 8.37 | 8.83  |
| 8.8   | 7.57 | 3.45 | 7.34 | 8.14  | 8.26  | 7.76 | 6.82 | 8.2   |
| 6.79  | 8.03 | 0    | 8.21 | 8.57  | 7.68  | 8.4  | 7.87 | 8.62  |
| 7.8   | 7.93 | 0    | 7.2  | 8.39  | 7.45  | 8.13 | 8.03 | 8.8   |
| 5.42  | 7.83 | 1.3  | 7.69 | 8.47  | 7.62  | 8.7  | 9.01 | 8.49  |
| 3.29  | 8.07 | 0.71 | 7.8  | 8.53  | 7.13  | 8.6  | 9.26 | 8.67  |
| 4.94  | 8.46 | 0.9  | 8.18 | 9.06  | 7.52  | 9.32 | 9.19 | 9.5   |
| 8.73  | 6.56 | 0    | 6.34 | 7.8   | 8.35  | 7.49 | 6.81 | 8.79  |
| 9.2   | 6.33 | 2.55 | 5.44 | 7.62  | 8.75  | 7.68 | 6.82 | 9.64  |
| 9.12  | 6.38 | 1.04 | 5.84 | 7.84  | 8.65  | 7.73 | 7.18 | 9.77  |

<https://mc.manuscriptcentral.com/gut>

1  
2  
3  
4  
5  
6  
7  
8  
9  
10  
11  
12  
13  
14  
15  
16  
17  
18  
19  
20  
21  
22  
23  
24  
25  
26  
27  
28  
29  
30  
31  
32  
33  
34  
35  
36  
37  
38  
39  
40  
41  
42  
43  
44  
45  
46  
47  
48  
49  
50  
51  
52  
53  
54  
55  
56  
57  
58  
59  
60

|       |      |      |      |       |       |      |      |       |
|-------|------|------|------|-------|-------|------|------|-------|
| 9.24  | 7.02 | 2.59 | 6.44 | 7.58  | 8.48  | 7.8  | 7.14 | 9.47  |
| 11.05 | 7.4  | 3.98 | 6.93 | 8.64  | 9.32  | 9.39 | 7.19 | 10.7  |
| 10.9  | 7.27 | 5.27 | 6.39 | 8.77  | 9.05  | 8.94 | 7.3  | 10.6  |
| 10.94 | 6.26 | 2.74 | 6.03 | 8.43  | 9.34  | 8.13 | 6.3  | 10.39 |
| 10.94 | 6.57 | 3.41 | 5.62 | 8.5   | 9.4   | 8.2  | 6.32 | 10.53 |
| 10    | 7.88 | 1.76 | 8.37 | 9.04  | 7.97  | 9.13 | 7.57 | 10.64 |
| 10.6  | 7.57 | 4.84 | 6.43 | 9.12  | 9.61  | 8.89 | 7.27 | 11.23 |
| 10.79 | 6.95 | 5.26 | 5.79 | 8.7   | 9.36  | 9.05 | 7.15 | 11.57 |
| 10.58 | 9.01 | 3.06 | 7.34 | 9.63  | 9.02  | 9.05 | 7.6  | 10.83 |
| 11.45 | 6.05 | 3.57 | 6.62 | 9.17  | 10.67 | 8.81 | 6.29 | 10.6  |
| 11.44 | 6.64 | 4.07 | 5.89 | 9.09  | 9.85  | 9.08 | 7.51 | 10.69 |
| 11.6  | 5.78 | 4.38 | 6.19 | 9.12  | 9.98  | 8.91 | 7.87 | 11.07 |
| 11.6  | 5.35 | 3.52 | 5.68 | 9.12  | 10.23 | 8.71 | 6.91 | 10.48 |
| 9.44  | 6.85 | 2.65 | 5.97 | 8.38  | 9.07  | 8.4  | 6.9  | 9.61  |
| 10.1  | 4.97 | 5.03 | 3.68 | 8.34  | 9.72  | 8.46 | 6.9  | 10.61 |
| 8.94  | 7.72 | 0.15 | 6.27 | 9.14  | 8.45  | 8.72 | 7.03 | 9.71  |
| 10.11 | 8.43 | 1    | 5.83 | 8.41  | 7.94  | 9.12 | 7.5  | 10    |
| 10.42 | 5.57 | 3.47 | 2.67 | 8.02  | 9.2   | 8.44 | 7.02 | 10.34 |
| 10.15 | 7.13 | 0.52 | 2.84 | 8.28  | 8.53  | 9.15 | 7.45 | 10.27 |
| 10.19 | 8.16 | 2.25 | 7.4  | 8.17  | 9.28  | 8.35 | 6.32 | 9.91  |
| 10.22 | 3.79 | 3.24 | 4.59 | 8.2   | 8.58  | 8.15 | 6.54 | 10.5  |
| 10.71 | 3.65 | 3.65 | 4.65 | 8.48  | 8.6   | 7.15 | 5.23 | 9.64  |
| 9.76  | 6.94 | 4.43 | 6.72 | 8.51  | 8.51  | 8.81 | 6.72 | 10.11 |
| 10.35 | 6.71 | 5.45 | 6.57 | 8.41  | 8.61  | 8.77 | 6.02 | 10.58 |
| 9.92  | 7.79 | 3.15 | 7.61 | 10.62 | 9.01  | 8.7  | 6.96 | 9.38  |
| 9.39  | 7.89 | 1.36 | 4.06 | 7.28  | 7.05  | 7.58 | 5.41 | 9.47  |
| 9.27  | 6.52 | 5.65 | 5.84 | 7.46  | 7.23  | 7.74 | 6.98 | 10.1  |
| 9.31  | 5.72 | 4.35 | 5.22 | 7.63  | 8.34  | 7.42 | 6.73 | 9.66  |
| 10.19 | 7.15 | 5.6  | 1.9  | 8.05  | 7.83  | 8.69 | 6.85 | 10.6  |
| 2.76  | 7.4  | 1.76 | 7.34 | 7.15  | 6.51  | 7.15 | 6.85 | 7.64  |
| 4.81  | 7.16 | 1.72 | 7    | 7.86  | 6.53  | 7.49 | 6.81 | 7.91  |
| 3.21  | 7.64 | 0.88 | 7.48 | 7.67  | 6.53  | 7.24 | 7.44 | 7.26  |
| 2.96  | 7.42 | 0.96 | 7.22 | 7.81  | 6.89  | 7.11 | 6.96 | 7.54  |
| 8.42  | 6.35 | 1.68 | 5    | 7.15  | 7.9   | 7.24 | 5.88 | 9.64  |
| 7.98  | 6.58 | 3.25 | 5.66 | 7.49  | 7.33  | 7.57 | 6.64 | 8.5   |
| 7.86  | 6.43 | 0    | 5.79 | 7.39  | 7.18  | 7.88 | 6.78 | 8.86  |
| 7.99  | 6.23 | 0    | 5.88 | 7.4   | 7.07  | 8.3  | 6.63 | 9.16  |
| 10.37 | 8.07 | 0.35 | 4.35 | 8.13  | 6.78  | 8.83 | 5.21 | 10.73 |
| 10.61 | 7.13 | 4.46 | 5.92 | 8.54  | 8.94  | 8.73 | 6.75 | 10.04 |
| 10.38 | 7.25 | 6.2  | 1.42 | 7.75  | 9.52  | 7.97 | 6.91 | 9.94  |
| 9.34  | 9.05 | 4.23 | 4.23 | 9.8   | 9.62  | 7.85 | 4.82 | 8.93  |
| 10.7  | 7.67 | 2.18 | 7.05 | 8.84  | 8.93  | 8.42 | 6.4  | 9.61  |
| 8.97  | 7.97 | 5.51 | 6.51 | 9.94  | 8.97  | 8.32 | 5.51 | 8.42  |
| 11.51 | 6.44 | 4.04 | 3.04 | 8.16  | 8.79  | 8.62 | 7.16 | 10.63 |
| 12.11 | 6.59 | 1.52 | 2.26 | 8.16  | 8.97  | 9.12 | 5.94 | 10.36 |
| 9.96  | 1.68 | 0.68 | 0.68 | 8.46  | 9.75  | 7.06 | 3.49 | 9.06  |
| 9.65  | 7.87 | 1.57 | 6.09 | 8.84  | 8.96  | 8.32 | 6.11 | 9.39  |
| 9.94  | 7.48 | 3.08 | 3.74 | 8.52  | 9.08  | 7.89 | 5.67 | 9.71  |
| 9.34  | 7.81 | 1.84 | 6.34 | 8.46  | 8.64  | 8.08 | 6.26 | 9.41  |
| 9.53  | 6.76 | 0    | 6    | 7.49  | 8.29  | 8.24 | 5.7  | 10.06 |
| 9.18  | 6.39 | 1.53 | 5.05 | 7.3   | 8.11  | 8.06 | 7.46 | 9.51  |
| 8.86  | 6.14 | 1.83 | 5.81 | 7.4   | 7.88  | 7.89 | 7.44 | 9.73  |

<https://mc.manuscriptcentral.com/gut>

1  
2  
3  
4  
5  
6  
7  
8  
9  
10  
11  
12  
13  
14  
15  
16  
17  
18  
19  
20  
21  
22  
23  
24  
25  
26  
27  
28  
29  
30  
31  
32  
33  
34  
35  
36  
37  
38  
39  
40  
41  
42  
43  
44  
45  
46  
47  
48  
49  
50  
51  
52  
53  
54  
55  
56  
57  
58  
59  
60

|      |      |      |      |       |      |      |      |       |
|------|------|------|------|-------|------|------|------|-------|
| 9.7  | 5.88 | 2.37 | 6.6  | 8.14  | 8.31 | 7.9  | 6.31 | 9.51  |
| 9.13 | 5.68 | 3.1  | 6.96 | 8.65  | 9.05 | 8.45 | 6.71 | 8.74  |
| 9.02 | 3.17 | 3.39 | 5.59 | 7.33  | 8.62 | 7.24 | 5.67 | 8.79  |
| 9.31 | 3.81 | 4.39 | 4.66 | 7.6   | 9.29 | 7.13 | 4.88 | 8.64  |
| 4.36 | 6.8  | 2.55 | 7.34 | 8.64  | 7.74 | 7.34 | 6.41 | 7.95  |
| 9.91 | 6.52 | 2.15 | 7.09 | 7.04  | 7.86 | 7.86 | 5.24 | 10.37 |
| 9.79 | 5.9  | 0.65 | 3.59 | 7.04  | 7.68 | 6.54 | 4.39 | 10.15 |
| 9.84 | 5.8  | 1.94 | 3.16 | 7.03  | 7.65 | 6.27 | 3.94 | 10.11 |
| 2.27 | 7.71 | 0.27 | 7.47 | 8.12  | 6.81 | 7.97 | 7.76 | 8.25  |
| 8.33 | 7.38 | 3.05 | 6.38 | 7.9   | 7.51 | 7.82 | 7.22 | 9.02  |
| 9.75 | 7.39 | 0.65 | 4.61 | 8.08  | 8.77 | 8.35 | 7.05 | 9.87  |
| 9.48 | 6.56 | 4.35 | 5.47 | 8.16  | 8.27 | 8.21 | 7.21 | 10.07 |
| 9.73 | 6.61 | 5.26 | 4.39 | 8.35  | 8.69 | 8.29 | 6.62 | 9.84  |
| 9.45 | 7.2  | 1.13 | 5.26 | 8.1   | 7.57 | 8.92 | 8.18 | 9.85  |
| 8.5  | 7.07 | 3.54 | 7.71 | 10.46 | 9.65 | 6.87 | 4.54 | 9     |
| 9.71 | 7.68 | 0.8  | 4.93 | 8.03  | 8.32 | 7.65 | 5.89 | 9.63  |
| 9.35 | 7.14 | 3.32 | 5.82 | 7.55  | 7.5  | 7.74 | 6.48 | 9.43  |
| 9.62 | 7.72 | 2.34 | 4.61 | 8.2   | 8.26 | 7.43 | 5.61 | 9.48  |

1  
2  
3  
4  
5  
6  
7  
8  
9  
10  
11  
12  
13  
14  
15  
16  
17  
18  
19  
20  
21  
22  
23  
24  
25  
26  
27  
28  
29  
30  
31  
32  
33  
34  
35  
36  
37  
38  
39  
40  
41  
42  
43  
44  
45  
46  
47  
48  
49  
50  
51  
52  
53  
54  
55  
56  
57  
58  
59  
60

| HIPK1 | HIPK2 | HK2  | HK3  | HKDC1 | HLADPB1 | HMOX1 | HOXA5 | HOXA7 |
|-------|-------|------|------|-------|---------|-------|-------|-------|
| 7.43  | 8.25  | 8.46 | 6.42 | 7.99  | 9.46    | 7.32  | 6.92  | 7.39  |
| 8.31  | 8.12  | 9.52 | 6.1  | 9.01  | 9.16    | 8.03  | 6.8   | 6.94  |
| 8.36  | 8.16  | 9.45 | 5.97 | 8.44  | 9.05    | 8.34  | 6.8   | 7.15  |
| 8.71  | 8.29  | 8.31 | 5.43 | 9.25  | 9.39    | 8.41  | 5.31  | 3.64  |
| 2.01  | 8.12  | 9.03 | 7.24 | 8.89  | 8.85    | 8.13  | 8.6   | 8.66  |
| 7.62  | 7.89  | 9.03 | 6.11 | 8.28  | 10.6    | 7.63  | 6.65  | 6.73  |
| 7.94  | 7.71  | 9.26 | 5.96 | 8.34  | 10.87   | 8.51  | 6.28  | 6.63  |
| 8.38  | 7.91  | 9.17 | 6.28 | 9.85  | 11.28   | 8.59  | 4.64  | 1.39  |
| 7.93  | 8.83  | 9.27 | 5.27 | 8.76  | 11.21   | 9.4   | 4.76  | 2.69  |
| 7.28  | 8.51  | 9.01 | 5.69 | 8.28  | 9.12    | 7.11  | 6.52  | 6.69  |
| 8.26  | 9.06  | 8.86 | 4.55 | 8.94  | 9.83    | 8.09  | 4.96  | 2.38  |
| 8.2   | 8.41  | 9.07 | 5.81 | 8.87  | 9.92    | 8.75  | 4.59  | 2.27  |
| 7.56  | 7.26  | 8.01 | 6.07 | 7.63  | 8.74    | 7.03  | 6.99  | 7.18  |
| 7.68  | 7.87  | 8.3  | 6.32 | 7.88  | 9.42    | 7.63  | 7.28  | 7.38  |
| 8.61  | 8.83  | 7.09 | 6.29 | 7.88  | 10.19   | 8.96  | 6.72  | 4.58  |
| 8.35  | 8.31  | 8.83 | 7.01 | 8.09  | 10.61   | 8.33  | 7.21  | 7.28  |
| 8.52  | 8.53  | 8.79 | 6.65 | 8.49  | 10.06   | 7.92  | 7.31  | 7.42  |
| 8.15  | 8.4   | 9.05 | 6.64 | 8.47  | 8.93    | 8.41  | 7.52  | 7.82  |
| 9.03  | 8.78  | 6.94 | 5.63 | 7.52  | 10.76   | 9.2   | 4.48  | 2.9   |
| 8.9   | 9.65  | 7.27 | 4.83 | 7.54  | 11.13   | 8.88  | 4.59  | 2.63  |
| 9.09  | 9.16  | 7.1  | 5.79 | 6.31  | 11.11   | 9.03  | 4.86  | 3.08  |
| 9.09  | 8.52  | 8.61 | 3.61 | 8.93  | 9.7     | 7.37  | 6.32  | 3.96  |
| 9.13  | 8.79  | 8.43 | 4.29 | 8.81  | 9.67    | 6.94  | 6.47  | 3.52  |
| 9.2   | 8.46  | 8.58 | 4.98 | 8.69  | 9.87    | 7.17  | 6.43  | 2.7   |
| 8.15  | 8.78  | 9.52 | 6.1  | 4.23  | 9.75    | 9.22  | 4.01  | 4.6   |
| 8.97  | 7.47  | 9.66 | 3.83 | 9.34  | 10.26   | 7.42  | 4.52  | 2.71  |
| 8.75  | 7.22  | 9.33 | 3.11 | 9.29  | 10.34   | 7.72  | 4.61  | 3.11  |
| 8.51  | 8.14  | 9.05 | 5.98 | 8.83  | 10.29   | 7.69  | 6.83  | 7.04  |
| 7.52  | 7.7   | 8.28 | 6.17 | 9.46  | 9.17    | 7.38  | 7.14  | 7     |
| 7.64  | 8.5   | 8.98 | 6.58 | 9.19  | 9.78    | 7.73  | 7.07  | 7.31  |
| 7.87  | 8.55  | 8.85 | 6.08 | 9.08  | 9.37    | 7.58  | 7.14  | 7.38  |
| 7.1   | 8.45  | 9.07 | 6.73 | 9.2   | 9.13    | 7.88  | 7.55  | 7.44  |
| 8     | 8.37  | 7.67 | 6.67 | 6.43  | 11.49   | 9.05  | 6.99  | 6.49  |
| 8.96  | 8.09  | 8.48 | 5.34 | 6.61  | 9.61    | 8.58  | 5.99  | 3.38  |
| 8.93  | 8.41  | 8.86 | 4.9  | 7.4   | 9.35    | 8.61  | 5.74  | 3.31  |
| 8.73  | 8.27  | 7.87 | 5.47 | 6.83  | 9.36    | 8.27  | 6.54  | 2.79  |
| 8.07  | 6.87  | 8.53 | 5.62 | 4.35  | 11.24   | 7.83  | 4.69  | 1.45  |
| 8.46  | 7.16  | 8.81 | 5.26 | 5.02  | 10.22   | 6.92  | 4.21  | 2.21  |
| 8.3   | 7.13  | 7.85 | 5.32 | 4.17  | 10.95   | 7.19  | 4.61  | 4.07  |
| 8.55  | 7.31  | 7.62 | 5.39 | 4.27  | 11.07   | 6.81  | 4.6   | 3.07  |
| 6.78  | 7.85  | 8.92 | 5.78 | 7.11  | 9.13    | 7.6   | 6.68  | 7.17  |
| 6.96  | 7.97  | 8.69 | 5.68 | 6.9   | 8.55    | 7.04  | 7     | 6.82  |
| 6.82  | 8.15  | 8.18 | 5.83 | 6.41  | 8.99    | 6.83  | 7.03  | 7.12  |
| 7.38  | 8.42  | 8.38 | 4.57 | 6.94  | 9.34    | 6.85  | 6.19  | 6.06  |
| 8.15  | 7.67  | 7.9  | 5.86 | 8.74  | 7.45    | 9.37  | 6.67  | 4.45  |
| 8.02  | 8.48  | 8.46 | 3.12 | 3.64  | 9.77    | 6.48  | 6.15  | 3.9   |
| 8     | 8.07  | 8.72 | 3.46 | 4.09  | 9.77    | 6.49  | 5.64  | 2     |
| 8.06  | 7.7   | 7.92 | 3.51 | 3.9   | 9.32    | 6.41  | 5.59  | 2.13  |
| 8.95  | 8.04  | 8.61 | 6.22 | 8.66  | 11.28   | 9.23  | 6.36  | 4.09  |
| 9.06  | 8.21  | 8.66 | 5.84 | 8.44  | 10.97   | 8.69  | 5.84  | 2.01  |
| 8.98  | 8.67  | 8.5  | 5.4  | 8.7   | 11.53   | 8.83  | 6.3   | 0.5   |

<https://mc.manuscriptcentral.com/gut>

|    |      |      |       |      |      |       |       |      |       |
|----|------|------|-------|------|------|-------|-------|------|-------|
| 1  |      |      |       |      |      |       |       |      |       |
| 2  | 9.11 | 8.36 | 8.57  | 6.08 | 8.02 | 11.64 | 8.63  | 6.6  | 0.08  |
| 3  | 8.23 | 7.93 | 8.43  | 6.03 | 9.16 | 9.23  | 7.81  | 7.37 | 7.47  |
| 4  | 8.28 | 8.56 | 8.56  | 5.83 | 8.54 | 9.23  | 7.67  | 7.82 | 7.46  |
| 5  | 8.45 | 8.76 | 8.68  | 5.57 | 8.88 | 9.04  | 7.73  | 7.47 | 7.19  |
| 6  | 8.23 | 8.36 | 8.65  | 6.34 | 8.3  | 9.82  | 7.65  | 7.63 | 7.55  |
| 7  | 8.79 | 9.4  | 8.42  | 5.32 | 7.67 | 10.55 | 8.6   | 5.55 | 5.27  |
| 8  | 8.59 | 10.1 | 9.3   | 4.64 | 7.42 | 9.96  | 8.04  | 5.57 | 3.42  |
| 9  | 8.91 | 9.91 | 8.28  | 3.76 | 8.07 | 7.92  | 7.92  | 6.06 | 2.46  |
| 10 | 9.12 | 9.8  | 8.87  | 4.25 | 7.99 | 9.51  | 8.59  | 6.32 | 2.02  |
| 11 | 8.73 | 8.57 | 9.21  | 5.14 | 3.97 | 10.97 | 7.8   | 5.54 | 4.58  |
| 12 | 8.94 | 8.54 | 7.44  | 5.07 | 5.13 | 11.12 | 7.42  | 5.19 | 4     |
| 13 | 8.92 | 8.59 | 6.99  | 4.77 | 6.58 | 10.72 | 7.19  | 4.27 | 5.06  |
| 14 | 8.81 | 8.54 | 7.05  | 4.5  | 5.79 | 10.65 | 7.25  | 5.02 | 3.98  |
| 15 | 7.96 | 7.47 | 7.96  | 8.32 | 9.4  | 9.74  | 10.58 | 7.47 | 9.61  |
| 16 | 7.98 | 8.41 | 9.16  | 7.75 | 9.47 | 10.19 | 9.38  | 7.43 | 9.05  |
| 17 | 7.75 | 8.17 | 9.03  | 7.02 | 8.42 | 10.59 | 8.49  | 7.78 | 8.19  |
| 18 | 2.57 | 9.75 | 9.67  | 7.84 | 9.23 | 8.46  | 10.06 | 9.6  | 9.93  |
| 19 | 3.1  | 9.76 | 9.65  | 7.79 | 8.98 | 8.42  | 9.81  | 9.51 | 10.23 |
| 20 | 8.56 | 8.24 | 9     | 5.84 | 9.29 | 9.25  | 7.73  | 7.01 | 6.91  |
| 21 | 8.47 | 7.9  | 9.69  | 5.78 | 9.57 | 9.3   | 7.79  | 7.34 | 7.04  |
| 22 | 8.24 | 8.05 | 8.75  | 6.24 | 8.97 | 9.47  | 7.66  | 7.4  | 7.41  |
| 23 | 9.66 | 7.8  | 7.04  | 4.1  | 9.18 | 10.37 | 7.46  | 4.85 | 2.27  |
| 24 | 9.48 | 7.94 | 7.47  | 5.14 | 8.78 | 9.94  | 7.29  | 6.28 | 5.53  |
| 25 | 8.58 | 7.63 | 8     | 6.72 | 8.96 | 9.7   | 7.03  | 7.48 | 7.66  |
| 26 | 9.45 | 9.42 | 9.47  | 4.34 | 6.16 | 11.62 | 8.04  | 5.49 | 4.34  |
| 27 | 9.27 | 8.69 | 9.82  | 3.85 | 7.1  | 11.23 | 8.39  | 5.74 | 4.8   |
| 28 | 9.1  | 8.63 | 10.3  | 5.15 | 6.69 | 11.27 | 8.45  | 5.6  | 3.01  |
| 29 | 8.41 | 8.57 | 9.25  | 6.42 | 8.02 | 10.02 | 7.31  | 6.94 | 6.7   |
| 30 | 8.4  | 8.6  | 9.25  | 6.53 | 8.09 | 9.52  | 7.26  | 6.97 | 6.64  |
| 31 | 8.22 | 8.62 | 9.32  | 6.84 | 7.85 | 9.63  | 7.19  | 6.97 | 7.25  |
| 32 | 8.25 | 8.44 | 8.97  | 6.42 | 8.63 | 9.62  | 8.16  | 7.56 | 7.33  |
| 33 | 8.11 | 8.81 | 8.76  | 6.37 | 9.34 | 9.12  | 8.09  | 7.62 | 7.45  |
| 34 | 7.92 | 8.76 | 9.08  | 6.93 | 9.53 | 8.83  | 8.2   | 7.8  | 7.9   |
| 35 | 8.28 | 8.15 | 8.79  | 6.31 | 6.46 | 9.32  | 7.58  | 7.1  | 7.11  |
| 36 | 8.31 | 8.08 | 9.5   | 6.49 | 6.8  | 9.11  | 7.87  | 7.17 | 7.4   |
| 37 | 8.34 | 7.78 | 9.02  | 6.59 | 6.57 | 9.26  | 8.99  | 6.97 | 7.3   |
| 38 | 7.8  | 7.91 | 8.61  | 6.78 | 7.28 | 9.8   | 8.31  | 7.58 | 7.62  |
| 39 | 7.8  | 7.91 | 8.61  | 6.78 | 7.28 | 9.8   | 8.31  | 7.58 | 7.62  |
| 40 | 8.11 | 8.17 | 9.56  | 6.43 | 7.94 | 9.23  | 7.43  | 7.26 | 7.53  |
| 41 | 8.15 | 8.19 | 9.24  | 6.81 | 7.92 | 8.95  | 7.46  | 7.42 | 7.75  |
| 42 | 8.1  | 7.99 | 9.14  | 6.23 | 7.37 | 9.1   | 7.66  | 7.47 | 7.33  |
| 43 | 7.17 | 7.97 | 8.41  | 7.12 | 7.3  | 10.05 | 8.32  | 7.96 | 7.97  |
| 44 | 7.58 | 8.33 | 9.37  | 6.16 | 7.5  | 9.7   | 8.4   | 7.3  | 7.18  |
| 45 | 7.76 | 8.07 | 10.07 | 5.78 | 7.9  | 9.57  | 8.72  | 7.16 | 7.2   |
| 46 | 7.38 | 8.1  | 8.98  | 6    | 7.46 | 9.67  | 7.85  | 7.98 | 8.05  |
| 47 | 9.13 | 7.69 | 7.5   | 3.98 | 8.73 | 10.2  | 7.97  | 4.48 | 2.73  |
| 48 | 9.14 | 7.78 | 7.51  | 3.08 | 9.25 | 9.05  | 7.59  | 4.93 | 1.66  |
| 49 | 9.03 | 7.83 | 7.15  | 6.27 | 9.25 | 10.11 | 9.09  | 5.04 | 2.84  |
| 50 | 7.14 | 7.94 | 8.55  | 6.91 | 7.43 | 9.97  | 7.72  | 7.38 | 7.79  |
| 51 | 7.94 | 8.08 | 8.51  | 6.86 | 7.8  | 9.03  | 8.06  | 7.38 | 7.39  |
| 52 | 7.76 | 7.89 | 8.6   | 6.29 | 7.76 | 9.04  | 7.03  | 7.72 | 7.31  |
| 53 | 7.42 | 7.95 | 8.14  | 6.01 | 7.87 | 9.45  | 6.94  | 7.48 | 7.27  |

<https://mc.manuscriptcentral.com/gut>

1  
2  
3  
4  
5  
6  
7  
8  
9  
10  
11  
12  
13  
14  
15  
16  
17  
18  
19  
20  
21  
22  
23  
24  
25  
26  
27  
28  
29  
30  
31  
32  
33  
34  
35  
36  
37  
38  
39  
40  
41  
42  
43  
44  
45  
46  
47  
48  
49  
50  
51  
52  
53  
54  
55  
56  
57  
58  
59  
60

|      |       |       |      |       |       |       |      |      |
|------|-------|-------|------|-------|-------|-------|------|------|
| 7.76 | 8.18  | 8.34  | 5.7  | 7.74  | 9.59  | 7.18  | 6.91 | 6.81 |
| 6.35 | 8.37  | 8.5   | 6.71 | 8.58  | 8.3   | 7.82  | 7.92 | 8.23 |
| 8.59 | 8.31  | 7.57  | 5.6  | 6     | 11.26 | 8.54  | 6.6  | 5.9  |
| 9.04 | 8.97  | 10.27 | 5.69 | 5.98  | 10.39 | 8.79  | 5.75 | 5.6  |
| 9.03 | 8.54  | 9.93  | 5.58 | 6.04  | 10.62 | 8.66  | 5.62 | 5.44 |
| 8.47 | 7.95  | 8.04  | 5.41 | 9.03  | 11.12 | 8.08  | 4.41 | 2.99 |
| 8.57 | 8.52  | 9.21  | 3.87 | 4.55  | 9.57  | 7.26  | 5.99 | 4.97 |
| 8.44 | 8.71  | 9.18  | 4.76 | 6.63  | 9.69  | 7.51  | 5.66 | 4.56 |
| 8.17 | 8.2   | 8.83  | 7.62 | 9.33  | 9.94  | 9.34  | 6.82 | 5.95 |
| 8.5  | 9.37  | 7.17  | 5.75 | 8.91  | 9.59  | 9     | 3.96 | 2.38 |
| 8.72 | 9.34  | 8.19  | 3.66 | 7.92  | 9.6   | 8.04  | 5.13 | 0.49 |
| 7.82 | 8.86  | 8.67  | 5.54 | 7.8   | 8.84  | 7.45  | 7.2  | 7.04 |
| 8.65 | 8.8   | 8.02  | 6.78 | 10.19 | 8.07  | 8.58  | 5.96 | 3.85 |
| 1.52 | 8.97  | 9.78  | 7.56 | 8.5   | 8.07  | 8.44  | 9.36 | 9.52 |
| 8.56 | 6.77  | 8.25  | 3.65 | 8.89  | 8.48  | 7.58  | 5.73 | 5.23 |
| 8.7  | 6.88  | 8.47  | 3.42 | 9.04  | 8.69  | 7.44  | 4.69 | 0    |
| 8.66 | 6.79  | 8.41  | 3.1  | 8.77  | 8.74  | 7.32  | 5.65 | 4.61 |
| 8.58 | 7.3   | 9.13  | 4.99 | 7.2   | 11.16 | 7.78  | 3.68 | 2.24 |
| 7.83 | 7.25  | 8.51  | 6.51 | 7.21  | 9.96  | 7.65  | 6.66 | 6.38 |
| 8.25 | 7.14  | 8.88  | 6.27 | 6.49  | 10.95 | 8.18  | 5.9  | 5.55 |
| 6.16 | 8.49  | 6.16  | 9.25 | 14.01 | 6.16  | 10.21 | 7.49 | 7.16 |
| 8.68 | 10.74 | 7.97  | 3.3  | 9.73  | 9.5   | 7.91  | 3.53 | 2.13 |
| 8.39 | 10.44 | 7.79  | 4.78 | 9.21  | 10.51 | 8.48  | 3.12 | 2.54 |
| 8.25 | 8.64  | 7.37  | 2.77 | 8.95  | 8.46  | 8.13  | 6.22 | 2.77 |
| 8.09 | 8.87  | 6.66  | 4.61 | 9.19  | 9.31  | 8.5   | 6.81 | 2.91 |
| 8.28 | 8.54  | 7.13  | 5    | 7.66  | 9.81  | 8.34  | 5.75 | 3.13 |
| 2    | 8.06  | 9.04  | 7.54 | 7.76  | 8.6   | 7.96  | 8.51 | 8.56 |
| 0.86 | 8.4   | 9.17  | 7.75 | 7.86  | 8.63  | 8.12  | 8.38 | 8.78 |
| 1.77 | 8.23  | 9.37  | 7.52 | 7.41  | 8.26  | 7.09  | 8.47 | 8.72 |
| 7.67 | 8.12  | 7.65  | 3.59 | 5.79  | 9.82  | 7.11  | 5.1  | 2.01 |
| 8    | 7.6   | 6.94  | 3.59 | 5.4   | 8.53  | 7.15  | 5.4  | 1.91 |
| 7.94 | 8.41  | 8.95  | 3.92 | 7.14  | 8.94  | 7     | 5.15 | 2.43 |
| 8.03 | 7.44  | 7.58  | 3.33 | 4.91  | 9.47  | 7.92  | 5.55 | 2.16 |
| 2.04 | 7.62  | 8.26  | 6.58 | 6.99  | 8.05  | 7.67  | 7.84 | 7.7  |
| 2.84 | 7.44  | 7.99  | 6.42 | 7.75  | 7.68  | 6.61  | 7.5  | 7.85 |
| 4.39 | 7.12  | 7.88  | 6.4  | 7.56  | 7.39  | 6.87  | 7.05 | 7.37 |
| 0.32 | 8.29  | 8.62  | 6.97 | 7.75  | 8.03  | 8.37  | 8.09 | 8.76 |
| 2.34 | 7.54  | 7.96  | 6.86 | 7.12  | 7.62  | 7.42  | 7.38 | 7.79 |
| 2.1  | 7.27  | 7.85  | 6.62 | 6.59  | 8.07  | 7.18  | 7.68 | 7.59 |
| 3.31 | 7.17  | 7.66  | 6.85 | 7.13  | 7.77  | 6.72  | 7.57 | 7.54 |
| 3.41 | 8.46  | 8.11  | 3.41 | 6.87  | 6.5   | 9.6   | 7.7  | 9.41 |
| 4.06 | 8.42  | 8.72  | 7.95 | 7.7   | 8.64  | 8.31  | 8.36 | 8.4  |
| 0.33 | 8.58  | 9.14  | 8    | 8.22  | 8.83  | 8.23  | 8.64 | 8.71 |
| 6.19 | 8.06  | 8.53  | 7.06 | 7.06  | 8.62  | 7.9   | 7.58 | 7.47 |
| 2.33 | 8.35  | 8.86  | 7.55 | 7.65  | 8.52  | 7.87  | 8.02 | 8.24 |
| 5.87 | 7.95  | 8.32  | 6.61 | 7.74  | 8.58  | 8.27  | 7.72 | 7.68 |
| 3.1  | 7.57  | 8.7   | 7.45 | 8.03  | 8.58  | 8.15  | 8.76 | 8.83 |
| 2.71 | 7.77  | 8.87  | 7.01 | 8.03  | 8.75  | 7.54  | 8.8  | 8.89 |
| 2.22 | 8.11  | 9.02  | 7.16 | 8.05  | 8.61  | 8.86  | 8.78 | 9.05 |
| 7.35 | 7.84  | 8.21  | 5.61 | 7.78  | 8.63  | 6.76  | 7.07 | 6.53 |
| 7.74 | 8.3   | 8.35  | 5.68 | 6.92  | 9.1   | 7.55  | 7.02 | 6.53 |
| 7.48 | 8.31  | 8.24  | 6.17 | 6.74  | 9.04  | 8.09  | 6.84 | 6.59 |

<https://mc.manuscriptcentral.com/gut>



|    |      |       |       |      |       |       |      |      |      |
|----|------|-------|-------|------|-------|-------|------|------|------|
| 1  |      |       |       |      |       |       |      |      |      |
| 2  | 7.4  | 8.08  | 8.33  | 6.25 | 6.76  | 9.48  | 7.65 | 6.76 | 6.25 |
| 3  | 8.74 | 8.5   | 9.88  | 6.56 | 6.96  | 10.09 | 9.16 | 7.19 | 7.23 |
| 4  | 8.51 | 8.83  | 9.11  | 6.62 | 7.21  | 9.29  | 8.71 | 7.11 | 7.27 |
| 5  | 8.34 | 8.12  | 9.7   | 6.6  | 7.3   | 8.36  | 8.69 | 7.23 | 7.5  |
| 6  | 8.49 | 8.25  | 9.87  | 6.4  | 7.53  | 8.67  | 8.43 | 7.45 | 7.2  |
| 7  | 8.64 | 8.42  | 9.36  | 6.61 | 8.44  | 10.37 | 8.5  | 7.3  | 7.36 |
| 8  | 9.28 | 8.77  | 9.8   | 5.65 | 9.39  | 10.51 | 9.13 | 6.4  | 5.16 |
| 9  | 9.48 | 9.09  | 10.08 | 5.02 | 9.61  | 10.23 | 8.65 | 5.76 | 4.3  |
| 10 | 9.37 | 8.67  | 8.81  | 6.39 | 7.15  | 11.06 | 8.97 | 7.52 | 4.55 |
| 11 | 8.87 | 9.03  | 9.28  | 6.05 | 9.93  | 10.55 | 9.03 | 6.09 | 6.01 |
| 12 | 8.8  | 10.04 | 8.42  | 5.81 | 7.31  | 10.95 | 8.58 | 6.43 | 6.12 |
| 13 | 8.9  | 10.08 | 8.52  | 5.78 | 7.64  | 11.19 | 8.89 | 6.53 | 6.41 |
| 14 | 8.91 | 10.16 | 8.68  | 4.97 | 8.21  | 10.18 | 8.39 | 6.63 | 5.68 |
| 15 | 8.55 | 8.59  | 8.22  | 5.73 | 8.94  | 10.91 | 8.33 | 6.23 | 6.3  |
| 16 | 9.26 | 9.37  | 9.23  | 4.64 | 9.48  | 10.83 | 8.53 | 5.26 | 2.97 |
| 17 | 8.42 | 8.34  | 8.21  | 5.93 | 8.81  | 10.27 | 8.08 | 7.45 | 6.5  |
| 18 | 8.66 | 8.06  | 6.94  | 5    | 5.72  | 11.25 | 7.85 | 5.85 | 3.32 |
| 19 | 8.94 | 8.16  | 8.17  | 4.75 | 7.17  | 9.59  | 8.13 | 5.71 | 2.67 |
| 20 | 8.92 | 7.52  | 7.56  | 5.1  | 7.12  | 9.53  | 8.2  | 5.73 | 2.52 |
| 21 | 8.85 | 7.73  | 7.77  | 4.84 | 8.02  | 9.9   | 9.29 | 4.79 | 1.93 |
| 22 | 8.03 | 6.78  | 8.83  | 4.19 | 8.84  | 8.58  | 8.27 | 6.16 | 4.3  |
| 23 | 7.95 | 7.36  | 8.88  | 3.8  | 9.37  | 7.93  | 7.2  | 5.9  | 4.57 |
| 24 | 8.41 | 8.91  | 8.77  | 6.46 | 7.57  | 10.02 | 7.95 | 7.17 | 7.06 |
| 25 | 8.53 | 9.2   | 8.94  | 5.88 | 7.08  | 10.1  | 7.23 | 7.27 | 6.93 |
| 26 | 8.28 | 8.24  | 8.28  | 6.47 | 9.03  | 9.03  | 9.75 | 7.54 | 6.32 |
| 27 | 8.01 | 6.61  | 6.34  | 5.36 | 3.82  | 10.5  | 7.5  | 2.68 | 1.95 |
| 28 | 7.92 | 7.11  | 7.06  | 4.38 | 6.11  | 10.05 | 7.13 | 5.25 | 4.7  |
| 29 | 7.42 | 6.86  | 6.9   | 4.85 | 5.67  | 9.84  | 6.81 | 3.93 | 3.46 |
| 30 | 8.69 | 6.85  | 6.07  | 5.07 | 5.36  | 10.57 | 6.76 | 4.71 | 1.9  |
| 31 | 2.76 | 6.76  | 7.97  | 6.93 | 6.93  | 7.43  | 6.97 | 7.71 | 7.4  |
| 32 | 3.89 | 7.09  | 7.92  | 6.55 | 7.47  | 7.35  | 6.85 | 7.42 | 7.09 |
| 33 | 0.88 | 7.15  | 7.95  | 7.03 | 7.31  | 7.44  | 7.15 | 7.72 | 7.64 |
| 34 | 3.28 | 7.2   | 8.17  | 6.68 | 6.63  | 7.46  | 7.19 | 7.86 | 7.51 |
| 35 | 7.19 | 7.33  | 8.2   | 5.47 | 7.33  | 8.91  | 6.61 | 5.97 | 6.15 |
| 36 | 6.95 | 7.62  | 7.43  | 6.05 | 6.87  | 8.16  | 6.33 | 6.79 | 6.43 |
| 37 | 6.72 | 7.22  | 7.49  | 5.35 | 6.79  | 7.98  | 6.61 | 6.49 | 6.66 |
| 38 | 7.07 | 7.09  | 7.51  | 5.83 | 6.84  | 8.59  | 7.53 | 6.16 | 6.44 |
| 39 | 8.46 | 7.82  | 6.8   | 3.94 | 3.52  | 11.83 | 7.48 | 4.44 | 1.35 |
| 40 | 8.64 | 8.64  | 9.01  | 4.46 | 10.24 | 9.06  | 7.71 | 6.55 | 5.85 |
| 41 | 8.49 | 8.69  | 8.74  | 5.59 | 7.47  | 10.56 | 8.35 | 5    | 2.74 |
| 42 | 8.01 | 8.52  | 8.19  | 7.19 | 7.55  | 9.89  | 9.26 | 5.82 | 2.23 |
| 43 | 8.33 | 8.01  | 8.22  | 5.95 | 7.89  | 8.93  | 8.78 | 6.57 | 6.21 |
| 44 | 7.83 | 8.42  | 8.1   | 7.32 | 8.97  | 10.1  | 8.97 | 6.83 | 4.51 |
| 45 | 8.81 | 9.11  | 8.32  | 3.96 | 6.45  | 9.29  | 7.62 | 5.68 | 2.19 |
| 46 | 8.78 | 9.31  | 7.23  | 3.84 | 4.89  | 9.21  | 8.23 | 6.06 | 0    |
| 47 | 8.46 | 8.42  | 9.35  | 2.68 | 8.41  | 5.54  | 8.92 | 3.49 | 1.68 |
| 48 | 8.35 | 7.98  | 8.99  | 5.89 | 7.86  | 9.22  | 9.07 | 5.84 | 6.03 |
| 49 | 8.48 | 8.05  | 8.79  | 5.13 | 7.87  | 8.75  | 8.56 | 4.8  | 4.08 |
| 50 | 8.02 | 7.86  | 8.64  | 6.48 | 7.58  | 9.33  | 9.01 | 6.14 | 6.6  |
| 51 | 7.84 | 7.42  | 8.32  | 4.38 | 5.5   | 10.17 | 6.64 | 4.66 | 2.57 |
| 52 | 7.46 | 7.49  | 7.86  | 4.99 | 5.95  | 9.04  | 7.13 | 6.11 | 6.2  |
| 53 | 7.2  | 7.6   | 7.83  | 5.59 | 6.36  | 9.25  | 6.78 | 6.68 | 6.45 |

|    |      |      |      |      |       |       |       |      |      |
|----|------|------|------|------|-------|-------|-------|------|------|
| 1  |      |      |      |      |       |       |       |      |      |
| 2  | 7.71 | 7    | 6.6  | 3.37 | 5.83  | 8.91  | 6.88  | 6.81 | 3.37 |
| 3  | 6.56 | 7.8  | 7.73 | 5.01 | 7.73  | 7.71  | 6.8   | 6.49 | 6.42 |
| 4  | 6.87 | 7.09 | 7.62 | 4.67 | 7.85  | 6.42  | 6.26  | 6.72 | 6.67 |
| 5  | 7.52 | 7.48 | 7.42 | 4.29 | 7.88  | 6.6   | 6.01  | 6.53 | 6.53 |
| 6  | 2.55 | 8.08 | 8.3  | 6.95 | 8.15  | 8.08  | 7.51  | 7.98 | 8.09 |
| 7  | 8.12 | 7.69 | 7.67 | 4.85 | 7.79  | 10.08 | 8.69  | 2.73 | 1.15 |
| 8  | 8.42 | 8.4  | 7.37 | 4.02 | 8.13  | 9.34  | 6.94  | 2.53 | 3.15 |
| 9  | 8.45 | 8.41 | 7.18 | 4.48 | 8.27  | 8.88  | 6.94  | 2.16 | 2.52 |
| 10 | 0.27 | 8.39 | 8.65 | 6.93 | 7.05  | 8.06  | 7.33  | 8.26 | 8.65 |
| 11 | 6.86 | 7.81 | 8.07 | 6.49 | 6.92  | 9.04  | 7.07  | 7.03 | 7.16 |
| 12 | 8.01 | 8.07 | 6.83 | 4.3  | 8.14  | 10.92 | 8.18  | 4.9  | 4.11 |
| 13 | 7.81 | 8.17 | 7.64 | 5.06 | 8.1   | 10.13 | 7.33  | 6.41 | 6.56 |
| 14 | 8.19 | 8.57 | 6.59 | 3.47 | 7.97  | 10.12 | 7.65  | 5.79 | 4.55 |
| 15 | 7.83 | 8.04 | 7.44 | 4.45 | 6.93  | 10.72 | 7.8   | 6.32 | 5.98 |
| 16 | 7.45 | 7.87 | 7.83 | 6.63 | 11.78 | 7.24  | 10.04 | 4.54 | 4.87 |
| 17 | 7.92 | 7.78 | 7.61 | 5.95 | 5.5   | 9.89  | 7.75  | 4.61 | 5.35 |
| 18 | 7.91 | 7.93 | 7.8  | 5.59 | 5.83  | 9.95  | 7.13  | 6.28 | 6.3  |
| 19 | 7.89 | 7.71 | 7.62 | 6.04 | 5.43  | 9.64  | 7.87  | 4.61 | 5.07 |
| 20 |      |      |      |      |       |       |       |      |      |
| 21 |      |      |      |      |       |       |       |      |      |
| 22 |      |      |      |      |       |       |       |      |      |
| 23 |      |      |      |      |       |       |       |      |      |
| 24 |      |      |      |      |       |       |       |      |      |
| 25 |      |      |      |      |       |       |       |      |      |
| 26 |      |      |      |      |       |       |       |      |      |
| 27 |      |      |      |      |       |       |       |      |      |
| 28 |      |      |      |      |       |       |       |      |      |
| 29 |      |      |      |      |       |       |       |      |      |
| 30 |      |      |      |      |       |       |       |      |      |
| 31 |      |      |      |      |       |       |       |      |      |
| 32 |      |      |      |      |       |       |       |      |      |
| 33 |      |      |      |      |       |       |       |      |      |
| 34 |      |      |      |      |       |       |       |      |      |
| 35 |      |      |      |      |       |       |       |      |      |
| 36 |      |      |      |      |       |       |       |      |      |
| 37 |      |      |      |      |       |       |       |      |      |
| 38 |      |      |      |      |       |       |       |      |      |
| 39 |      |      |      |      |       |       |       |      |      |
| 40 |      |      |      |      |       |       |       |      |      |
| 41 |      |      |      |      |       |       |       |      |      |
| 42 |      |      |      |      |       |       |       |      |      |
| 43 |      |      |      |      |       |       |       |      |      |
| 44 |      |      |      |      |       |       |       |      |      |
| 45 |      |      |      |      |       |       |       |      |      |
| 46 |      |      |      |      |       |       |       |      |      |
| 47 |      |      |      |      |       |       |       |      |      |
| 48 |      |      |      |      |       |       |       |      |      |
| 49 |      |      |      |      |       |       |       |      |      |
| 50 |      |      |      |      |       |       |       |      |      |
| 51 |      |      |      |      |       |       |       |      |      |
| 52 |      |      |      |      |       |       |       |      |      |
| 53 |      |      |      |      |       |       |       |      |      |
| 54 |      |      |      |      |       |       |       |      |      |
| 55 |      |      |      |      |       |       |       |      |      |
| 56 |      |      |      |      |       |       |       |      |      |
| 57 |      |      |      |      |       |       |       |      |      |
| 58 |      |      |      |      |       |       |       |      |      |
| 59 |      |      |      |      |       |       |       |      |      |
| 60 |      |      |      |      |       |       |       |      |      |

1  
2  
3  
4  
5  
6  
7  
8  
9  
10  
11  
12  
13  
14  
15  
16  
17  
18  
19  
20  
21  
22  
23  
24  
25  
26  
27  
28  
29  
30  
31  
32  
33  
34  
35  
36  
37  
38  
39  
40  
41  
42  
43  
44  
45  
46  
47  
48  
49  
50  
51  
52  
53  
54  
55  
56  
57  
58  
59  
60

| HOXB13 | HOXB3 | HPSE | HRAS | HSD17B12 | HSP90B1 | HSPB1 | HSPG2 | HUNK |
|--------|-------|------|------|----------|---------|-------|-------|------|
| 5.65   | 7.61  | 7.45 | 5.71 | 8.49     | 9.86    | 9.43  | 10.81 | 6.15 |
| 5.88   | 7.8   | 6.85 | 6.37 | 9.06     | 9.32    | 10.89 | 11.32 | 6.16 |
| 5.61   | 7.69  | 7.32 | 6.74 | 8.9      | 9.16    | 12.01 | 11.11 | 6.21 |
| 2.18   | 8.54  | 6.33 | 6.18 | 9.11     | 9.53    | 12.59 | 12.4  | 5.93 |
| 7.79   | 8.75  | 8.57 | 6.05 | 8.84     | 5.47    | 10.49 | 8.14  | 7.56 |
| 6.06   | 8.09  | 6.82 | 5.44 | 8.99     | 9.84    | 9.46  | 10.23 | 6.26 |
| 5.87   | 7.78  | 7.17 | 5.44 | 9        | 9.79    | 9.34  | 10.58 | 6.2  |
| 3.39   | 9.12  | 6.56 | 6.12 | 9.48     | 10.18   | 11.77 | 11.78 | 5.04 |
| 2.37   | 6.67  | 7.61 | 6.17 | 9.68     | 10.39   | 9.87  | 12.73 | 2.95 |
| 4.95   | 6.95  | 6.57 | 5.89 | 9.29     | 9.97    | 9.29  | 11.73 | 6    |
| 3.96   | 6.51  | 6.82 | 6.36 | 9.75     | 10.73   | 9.57  | 12.14 | 4.84 |
| 1.68   | 6.81  | 6.85 | 6.21 | 9.6      | 10.54   | 10.11 | 12.27 | 4    |
| 6.78   | 8.41  | 6.37 | 6.79 | 10.32    | 9.27    | 9.31  | 10.11 | 7.49 |
| 6.18   | 8     | 6.73 | 6.77 | 10.01    | 9.46    | 9.73  | 11.06 | 7.48 |
| 2.77   | 9.61  | 6.98 | 6.16 | 9.13     | 10.07   | 12.35 | 12.74 | 5.35 |
| 5.47   | 7.72  | 7.39 | 6.03 | 9.2      | 9.36    | 10.55 | 11.04 | 6.4  |
| 6.29   | 8.1   | 7.76 | 7.02 | 9.47     | 9.83    | 11.6  | 11.36 | 6.61 |
| 5.89   | 8.45  | 7.87 | 6.76 | 9.71     | 9.66    | 11.65 | 11.72 | 5.93 |
| 2.22   | 8.42  | 6.25 | 6.22 | 7.5      | 9.83    | 10.32 | 12.47 | 4.7  |
| 2.48   | 7.97  | 6.52 | 6.36 | 7.91     | 10.22   | 9.24  | 11.85 | 4.73 |
| 2.08   | 8.25  | 6.36 | 6.28 | 7.7      | 10.07   | 10.39 | 12.16 | 4.08 |
| 5.47   | 8.46  | 6.3  | 6.36 | 9.58     | 11.06   | 11.47 | 11.92 | 5.61 |
| 5.52   | 8.56  | 6.2  | 6.48 | 9.55     | 11.1    | 11.81 | 11.58 | 5.06 |
| 5.29   | 8.32  | 6.08 | 6.35 | 9.6      | 10.87   | 11.86 | 11.97 | 5.14 |
| 4.6    | 6.07  | 5.28 | 6.51 | 8.7      | 10.6    | 10.37 | 10.36 | 7.43 |
| 5.49   | 6.82  | 4.65 | 7.15 | 9.34     | 10.93   | 9.47  | 10.83 | 4.88 |
| 6.16   | 7.56  | 4.84 | 7.16 | 9.31     | 10.89   | 9.6   | 10.81 | 4.43 |
| 5.98   | 7.66  | 6.42 | 6.44 | 8.88     | 10.71   | 9.71  | 10.59 | 5.77 |
| 5.5    | 7.76  | 6.47 | 6.2  | 8.78     | 9.64    | 10.24 | 10.27 | 6.34 |
| 5.16   | 8.21  | 6.78 | 5.96 | 8.59     | 9.81    | 10.28 | 11.04 | 6.11 |
| 5.37   | 8     | 6.69 | 6.17 | 8.86     | 9.94    | 10.34 | 10.97 | 6.39 |
| 6.38   | 8.49  | 7.49 | 6.38 | 8.66     | 9.57    | 10.37 | 11    | 7.07 |
| 6.26   | 7.14  | 7.86 | 5.45 | 8.35     | 8.62    | 8.66  | 8.93  | 5.81 |
| 4.87   | 8.12  | 6.08 | 6.06 | 9.46     | 9.95    | 11.03 | 11.9  | 5.99 |
| 4.7    | 7.04  | 5.88 | 6.07 | 9.62     | 9.99    | 10.79 | 11.64 | 6.47 |
| 4.56   | 7.88  | 6.03 | 6.11 | 9.39     | 9.83    | 11.48 | 11.89 | 6.11 |
| 3.03   | 8.98  | 6.67 | 6.12 | 9.16     | 9.46    | 10.56 | 10.14 | 3.62 |
| 3.49   | 6.62  | 6.7  | 5.81 | 9.47     | 10.21   | 9.47  | 10.01 | 3.21 |
| 4.17   | 7.83  | 6.3  | 5.58 | 8.99     | 9.98    | 9.36  | 10.29 | 3.83 |
| 3.44   | 7.61  | 6.15 | 5.5  | 8.82     | 9.91    | 9.6   | 10.02 | 3.2  |
| 5.74   | 7.82  | 6.43 | 5.04 | 7.9      | 8.88    | 8.5   | 10.29 | 5.99 |
| 5.8    | 7.75  | 6.89 | 5.7  | 8.57     | 8.95    | 9.05  | 10.13 | 5.76 |
| 5.83   | 7.72  | 6.48 | 5.31 | 8.28     | 8.44    | 8.18  | 9.99  | 6.05 |
| 5.72   | 8.05  | 6.21 | 5.52 | 8.29     | 9.41    | 8.48  | 10.34 | 5.27 |
| 4.86   | 8.53  | 6.56 | 6.86 | 7.45     | 10.22   | 11.88 | 12.55 | 6.45 |
| 6.64   | 8.31  | 5.6  | 5.93 | 8.68     | 10.31   | 8.81  | 11.41 | 5.64 |
| 6.64   | 8.14  | 5.52 | 5.93 | 8.62     | 10.39   | 8.76  | 11.92 | 5.42 |
| 6.15   | 8.18  | 5.42 | 5.87 | 8.72     | 10.1    | 9.45  | 12.09 | 5.17 |
| 2.96   | 7.71  | 7.38 | 6.57 | 9.52     | 10.8    | 11.59 | 11.49 | 5.22 |
| 3.59   | 7.13  | 7.27 | 6.37 | 9.25     | 10.9    | 12.02 | 11.47 | 4.76 |
| 4.08   | 6.58  | 6.64 | 6.6  | 9.02     | 11.34   | 11.95 | 11.13 | 4.95 |

<https://mc.manuscriptcentral.com/gut>

|    |      |      |       |      |       |       |       |       |      |
|----|------|------|-------|------|-------|-------|-------|-------|------|
| 1  |      |      |       |      |       |       |       |       |      |
| 2  | 4.08 | 7.58 | 7.11  | 6.4  | 9.27  | 11.01 | 11.99 | 11.51 | 5.66 |
| 3  | 5.86 | 9.31 | 6.41  | 7.06 | 9.81  | 9.75  | 10.42 | 10.69 | 7.99 |
| 4  | 5.47 | 8.86 | 6.82  | 6.77 | 9.7   | 9.77  | 10.22 | 10.99 | 9.44 |
| 5  | 5.24 | 9.01 | 6.61  | 6.49 | 9.95  | 9.68  | 9.67  | 10.8  | 9.03 |
| 6  | 5.58 | 8.96 | 6.92  | 6.48 | 9.65  | 9.61  | 9.89  | 10.67 | 9.49 |
| 7  | 3.81 | 6.74 | 6.55  | 6.97 | 9.34  | 10.31 | 10.92 | 12.12 | 5.14 |
| 8  | 3.25 | 7.48 | 6.8   | 7.08 | 9.58  | 10.7  | 11.28 | 12.32 | 5.15 |
| 9  | 3.76 | 6.45 | 5.78  | 7.58 | 9.62  | 10.99 | 12.28 | 12.32 | 5.76 |
| 10 | 3.25 | 7.42 | 5.57  | 7.38 | 9.56  | 11.27 | 12.73 | 12.5  | 6.02 |
| 11 | 5.07 | 5.04 | 6.17  | 6.73 | 8.36  | 10.76 | 11.34 | 10.31 | 5.34 |
| 12 | 4.63 | 5.93 | 6.4   | 7.02 | 9.53  | 10.88 | 10.98 | 10.72 | 4.35 |
| 13 | 3.52 | 5.54 | 6.49  | 7.04 | 9.3   | 10.88 | 11.12 | 10.42 | 4.14 |
| 14 | 4.62 | 5.93 | 6.26  | 6.69 | 9.42  | 10.79 | 10.97 | 10.64 | 3.68 |
| 15 | 6.74 | 7.96 | 8.96  | 6.74 | 6.74  | 9.15  | 13.74 | 10.06 | 5.15 |
| 16 | 6.25 | 8.21 | 8.91  | 5.11 | 7.33  | 9.55  | 12.61 | 11.32 | 5.49 |
| 17 | 6.65 | 7.84 | 8.03  | 5.89 | 7.82  | 9.67  | 10.96 | 10.56 | 6.06 |
| 18 | 8.37 | 9.28 | 10.09 | 5.41 | 8.03  | 6.97  | 9.36  | 9.43  | 7.2  |
| 19 | 8.04 | 9.24 | 9.65  | 5.68 | 7.27  | 6.61  | 10.2  | 9.73  | 7.28 |
| 20 | 6.14 | 6.72 | 6.68  | 6.21 | 6.85  | 9.4   | 8.24  | 10.57 | 6.69 |
| 21 | 6.03 | 6.64 | 6.37  | 6.38 | 6.43  | 9.58  | 7.92  | 10.46 | 6.51 |
| 22 | 5.72 | 7.29 | 6.86  | 6.23 | 7.03  | 9.33  | 8.26  | 10.55 | 6.44 |
| 23 | 6.13 | 8.68 | 6.7   | 6.93 | 10.13 | 10.08 | 11.83 | 11.16 | 5.59 |
| 24 | 6.37 | 8.66 | 6.28  | 6.94 | 9.8   | 9.83  | 11.65 | 10.79 | 6.11 |
| 25 | 6.96 | 9.1  | 7.09  | 6.37 | 9.47  | 8.96  | 10.57 | 10.35 | 6.8  |
| 26 | 4.64 | 9.18 | 6.87  | 6.7  | 10.58 | 10.82 | 10.09 | 11.26 | 5.16 |
| 27 | 4.63 | 9.51 | 6.8   | 6.78 | 10.77 | 10.5  | 10.85 | 11.57 | 5.68 |
| 28 | 2.28 | 10.1 | 6.21  | 6.84 | 10.69 | 10.18 | 10.74 | 11.69 | 5.28 |
| 29 | 6.49 | 7.64 | 6.83  | 7.05 | 10.3  | 10.78 | 10.44 | 10.62 | 6.36 |
| 30 | 6.42 | 7.86 | 6.41  | 7.25 | 10.33 | 10.78 | 10.7  | 10.78 | 6.17 |
| 31 | 6.34 | 7.81 | 6.63  | 6.85 | 10.23 | 10.62 | 10.59 | 10.67 | 6.72 |
| 32 | 6.07 | 8.67 | 7.55  | 6.49 | 10.57 | 9.44  | 10.65 | 10.71 | 7.96 |
| 33 | 5.62 | 8.33 | 7.59  | 6.33 | 10.91 | 9.74  | 10.59 | 10.72 | 7.54 |
| 34 | 6.66 | 8.91 | 7.78  | 6.5  | 10.36 | 9.49  | 11.11 | 10.49 | 7.8  |
| 35 | 5.98 | 8.87 | 7.5   | 6.36 | 9.54  | 9.65  | 11.13 | 11.88 | 6.3  |
| 36 | 6.34 | 9.05 | 7.81  | 6.37 | 9.54  | 9.62  | 10.7  | 11.75 | 6.35 |
| 37 | 6.36 | 8.6  | 7.76  | 6.4  | 9.64  | 9.63  | 11.23 | 12.03 | 6.13 |
| 38 | 6.68 | 8.37 | 7.4   | 5.65 | 8.75  | 8.96  | 9.58  | 10.64 | 7.01 |
| 39 | 6.68 | 8.37 | 7.4   | 5.65 | 8.75  | 8.96  | 9.58  | 10.64 | 7.01 |
| 40 | 6.72 | 9.25 | 7.63  | 6.34 | 9.16  | 8.9   | 10.67 | 10.72 | 6.69 |
| 41 | 6.88 | 8.75 | 7.62  | 5.91 | 9.14  | 8.9   | 10.74 | 11.04 | 7.18 |
| 42 | 7.08 | 9.04 | 7.66  | 6.13 | 9.03  | 9.07  | 10.45 | 11.2  | 6.76 |
| 43 | 7.3  | 7.86 | 7.85  | 5.73 | 9.14  | 8.41  | 8.39  | 9.21  | 7.4  |
| 44 | 6.74 | 8.34 | 7.22  | 5.25 | 9.86  | 9.88  | 9.51  | 10.94 | 7.05 |
| 45 | 7.06 | 8.3  | 6.95  | 5.99 | 10.19 | 9.73  | 9.34  | 10.68 | 6.99 |
| 46 | 7.26 | 8.57 | 7.6   | 4.93 | 9.52  | 8.78  | 10    | 10.87 | 7.23 |
| 47 | 5.61 | 8.7  | 5.84  | 6.62 | 10.83 | 10.32 | 11.32 | 11.87 | 7    |
| 48 | 6.29 | 8.35 | 4.88  | 6.43 | 10.99 | 10.08 | 11.03 | 11.82 | 6.6  |
| 49 | 5.27 | 8.87 | 6.52  | 6.54 | 10.54 | 9.88  | 12.2  | 12.21 | 7.1  |
| 50 | 6.66 | 7.9  | 7.72  | 5.65 | 8.68  | 8.04  | 8.99  | 9.78  | 7.17 |
| 51 | 6.37 | 8.36 | 7.33  | 5.87 | 9.1   | 8.77  | 10.48 | 11.16 | 7.06 |
| 52 | 6.16 | 8.87 | 7.58  | 6.24 | 9.1   | 8.31  | 10.61 | 10.94 | 7.22 |
| 53 | 6.64 | 8.6  | 7.36  | 5.68 | 9.03  | 8.89  | 10.49 | 10    | 6.82 |

<https://mc.manuscriptcentral.com/gut>

1  
2  
3  
4  
5  
6  
7  
8  
9  
10  
11  
12  
13  
14  
15  
16  
17  
18  
19  
20  
21  
22  
23  
24  
25  
26  
27  
28  
29  
30  
31  
32  
33  
34  
35  
36  
37  
38  
39  
40  
41  
42  
43  
44  
45  
46  
47  
48  
49  
50  
51  
52  
53  
54  
55  
56  
57  
58  
59  
60

|      |       |      |      |      |       |       |       |      |
|------|-------|------|------|------|-------|-------|-------|------|
| 6.25 | 8.29  | 7.07 | 5.31 | 9.21 | 9.28  | 10.62 | 10.46 | 6.49 |
| 7.01 | 9.12  | 8.51 | 5.33 | 8.82 | 7.59  | 12.19 | 10.78 | 6.81 |
| 5.51 | 7.1   | 7.13 | 5.55 | 8.89 | 9.53  | 9.45  | 10.55 | 4.77 |
| 5.4  | 8.89  | 7.09 | 6.96 | 9.77 | 9.72  | 12.75 | 11.77 | 4.47 |
| 6.01 | 9.26  | 6.92 | 6.47 | 9.63 | 9.74  | 10.86 | 12.17 | 5.19 |
| 5.11 | 8.59  | 6.93 | 6.21 | 8.66 | 10.32 | 12.02 | 12.48 | 3.73 |
| 6.62 | 9.1   | 6.44 | 6.48 | 9.61 | 10.5  | 10.7  | 11.53 | 3.55 |
| 5.89 | 8.8   | 7.01 | 6.28 | 9.65 | 10.23 | 10.87 | 12.18 | 3.56 |
| 2.49 | 11.54 | 7.4  | 6.08 | 9.35 | 9.6   | 14.76 | 14.49 | 5.08 |
| 5.04 | 10.32 | 6.04 | 5.96 | 9.28 | 9.47  | 11.17 | 11.9  | 6.77 |
| 5.95 | 9.42  | 5.81 | 5.78 | 9.28 | 9.79  | 10.13 | 11.61 | 6.3  |
| 7.02 | 8.8   | 6.75 | 4.94 | 8.89 | 8.86  | 9.07  | 10.26 | 6.86 |
| 5.07 | 11.51 | 6.17 | 6.65 | 9.08 | 9.35  | 14.02 | 13.33 | 6.85 |
| 7.95 | 9.21  | 8.16 | 6.51 | 8.7  | 5.39  | 8.75  | 8.26  | 8.2  |
| 5.5  | 7.53  | 5.5  | 5.78 | 9.58 | 9.15  | 10.45 | 10.9  | 6.84 |
| 5.26 | 7.39  | 5.29 | 6.14 | 9.84 | 9.26  | 10.07 | 10.96 | 6.69 |
| 5.47 | 7.44  | 5.75 | 5.69 | 9.67 | 9.13  | 10.18 | 10.92 | 6.94 |
| 3.14 | 6.55  | 7.17 | 6.39 | 9    | 10.33 | 10.88 | 10.83 | 3.76 |
| 5.9  | 7.45  | 7.54 | 5.61 | 8.48 | 9.37  | 10.96 | 10.32 | 5.72 |
| 5.01 | 7.1   | 7.4  | 5.84 | 8.61 | 9.67  | 11.16 | 10.66 | 4.4  |
| 6.16 | 11.7  | 7.49 | 6.16 | 7.49 | 6.16  | 15.91 | 14.98 | 6.16 |
| 4.99 | 7.57  | 5.38 | 6.28 | 9.27 | 10.22 | 10.03 | 11.8  | 5.99 |
| 4.62 | 7.14  | 5.78 | 6.03 | 9.07 | 10.22 | 10.28 | 11.65 | 5.82 |
| 5.82 | 9.62  | 6.27 | 6.61 | 9.72 | 9.62  | 12.52 | 12.9  | 4.64 |
| 4.81 | 10.08 | 6.61 | 6.08 | 9.65 | 9.21  | 13.29 | 13.09 | 6.23 |
| 4.79 | 8.87  | 5.4  | 6.07 | 9.66 | 9.89  | 11.96 | 12.49 | 5.9  |
| 7.32 | 8.57  | 8.11 | 6.08 | 8.18 | 6.04  | 9.81  | 9.29  | 7.83 |
| 7.4  | 8.61  | 8.16 | 5.67 | 8.28 | 4.76  | 8.73  | 8.76  | 7.91 |
| 7.55 | 8.29  | 8.07 | 5.35 | 7.88 | 4.09  | 7.44  | 8.18  | 7.7  |
| 4.65 | 7.81  | 5.14 | 4.59 | 8.61 | 8.98  | 9.39  | 10.69 | 4.59 |
| 1.91 | 8.37  | 5.18 | 5.11 | 8.64 | 9.08  | 10.31 | 11.56 | 4.45 |
| 4.36 | 8.4   | 5.47 | 5.32 | 8.59 | 8.92  | 10.84 | 11.24 | 4.57 |
| 3.33 | 7.86  | 5.11 | 5.01 | 8.64 | 8.95  | 10.29 | 11.29 | 4.4  |
| 6.62 | 7.77  | 7.88 | 5.21 | 7.17 | 5.77  | 9.88  | 8.69  | 6.72 |
| 6.48 | 7.7   | 7.05 | 4.84 | 7.65 | 5.46  | 9.89  | 8.32  | 6.66 |
| 6.27 | 7.58  | 6.97 | 5.02 | 7.3  | 6.34  | 10.12 | 8.52  | 6.47 |
| 6.92 | 7.78  | 8.58 | 4.41 | 7.43 | 5.55  | 7.91  | 7.77  | 6.3  |
| 7.01 | 7.53  | 7.58 | 5.14 | 8.05 | 4.14  | 7.76  | 8.29  | 7.4  |
| 6.77 | 7.51  | 7.54 | 5.18 | 8.1  | 3.68  | 8.16  | 8.44  | 7.12 |
| 6.86 | 7.87  | 7.5  | 4.89 | 7.79 | 4.63  | 8.31  | 8.42  | 7.09 |
| 6.22 | 5.73  | 9.86 | 2.41 | 5.22 | 7.97  | 8.82  | 7.62  | 5    |
| 7.64 | 8.31  | 8.35 | 6.06 | 8.41 | 5.91  | 9.11  | 9.43  | 7.78 |
| 7.93 | 8.86  | 8.63 | 6.29 | 8.99 | 5.08  | 8.23  | 8.9   | 8.17 |
| 6.51 | 7.83  | 7.42 | 6.62 | 8.12 | 7.36  | 10.35 | 10.57 | 7.19 |
| 7.45 | 8.38  | 8.29 | 5.68 | 8.44 | 6.02  | 9.56  | 9.36  | 7.72 |
| 7.19 | 8.45  | 7.57 | 5.85 | 8.43 | 7.62  | 9.51  | 10.7  | 7.14 |
| 7.66 | 8.7   | 7.89 | 6.18 | 8.37 | 6.05  | 9.92  | 10.19 | 8.07 |
| 7.84 | 8.5   | 7.98 | 5.75 | 8.52 | 5.66  | 7.25  | 8.4   | 7.91 |
| 8.05 | 8.32  | 8.81 | 5.68 | 8.4  | 6.56  | 9.8   | 9.51  | 7.48 |
| 6.29 | 7.87  | 7.03 | 5.69 | 9.41 | 8.71  | 9.12  | 9.32  | 5.91 |
| 6.44 | 7.47  | 7.22 | 6.24 | 9.6  | 8.85  | 10.34 | 9.76  | 6.12 |
| 6.5  | 7.72  | 7.16 | 6.62 | 9.69 | 8.79  | 10.25 | 9.77  | 6.04 |

<https://mc.manuscriptcentral.com/gut>

|    |      |      |      |      |       |       |       |       |      |
|----|------|------|------|------|-------|-------|-------|-------|------|
| 1  |      |      |      |      |       |       |       |       |      |
| 2  | 6.55 | 7.59 | 7.28 | 6.57 | 9.43  | 8.79  | 10.06 | 9.47  | 6.13 |
| 3  | 6.42 | 8.16 | 7.46 | 6.6  | 9.37  | 10.86 | 10.11 | 10.99 | 5.98 |
| 4  | 6.46 | 8.24 | 7.33 | 6.51 | 9.68  | 10.82 | 10.26 | 11.22 | 5.82 |
| 5  | 6.93 | 8.3  | 7.41 | 6.97 | 9.28  | 10.6  | 9.34  | 10.45 | 5.5  |
| 6  | 6.96 | 8.24 | 7.37 | 6.76 | 9.28  | 10.41 | 9.28  | 10.51 | 5.72 |
| 7  | 6.85 | 8.52 | 8.2  | 6.03 | 9.19  | 10.36 | 10.49 | 11.26 | 6.55 |
| 8  | 4.75 | 8.84 | 7.51 | 6.37 | 9.81  | 11.72 | 11.96 | 12.31 | 5.09 |
| 9  | 4.62 | 8.04 | 7.27 | 5.98 | 9.54  | 11.76 | 11.21 | 11.81 | 5.23 |
| 10 | 4.55 | 9.38 | 7.03 | 6.17 | 9.56  | 11.65 | 12.62 | 12.71 | 4.74 |
| 11 | 6.32 | 9.68 | 7.53 | 7.79 | 10.48 | 10.53 | 12.64 | 12.02 | 6.74 |
| 12 | 6.52 | 9.37 | 7.76 | 6.69 | 10.26 | 10.43 | 11.81 | 11.68 | 6.61 |
| 13 | 6.32 | 9.75 | 7.93 | 6.97 | 10.36 | 10.52 | 12.03 | 11.78 | 6.78 |
| 14 | 5.92 | 9.5  | 7.4  | 7.3  | 10.44 | 10.78 | 12.13 | 11.96 | 6.74 |
| 15 | 5.74 | 8.59 | 6.99 | 5.28 | 10.29 | 9.98  | 10.45 | 10.73 | 5.56 |
| 16 | 5.39 | 8.71 | 6.29 | 5.6  | 10.78 | 10.66 | 10.89 | 11.31 | 4.26 |
| 17 | 5.5  | 9.56 | 7.16 | 5.54 | 9.99  | 9.22  | 12.73 | 12.21 | 5.98 |
| 18 | 3.7  | 8.23 | 6.7  | 5.67 | 7.77  | 9.51  | 10.28 | 11.22 | 3.7  |
| 19 | 5.91 | 8.09 | 6.42 | 6.42 | 8.62  | 10.22 | 10.54 | 11.44 | 4.47 |
| 20 | 4.22 | 7.95 | 6.54 | 5.73 | 8.44  | 9.94  | 11.48 | 12.28 | 5.04 |
| 21 | 4.39 | 5.93 | 6.18 | 5.86 | 8.98  | 10.97 | 9.76  | 10.64 | 3.63 |
| 22 | 3.71 | 8.07 | 5.52 | 6.36 | 10.19 | 9.96  | 10.33 | 11.02 | 6.68 |
| 23 | 4.34 | 8.68 | 4.52 | 6.19 | 10.17 | 9.94  | 10.04 | 10.5  | 8.28 |
| 24 | 5.63 | 8.33 | 6.89 | 6.11 | 9.26  | 9.71  | 10.2  | 11.33 | 6.66 |
| 25 | 6.18 | 8.59 | 6.45 | 6.57 | 9.56  | 9.8   | 10.59 | 11.41 | 6.74 |
| 26 | 4.74 | 10.4 | 6.96 | 6.61 | 9.54  | 9.64  | 14.43 | 13.9  | 5.96 |
| 27 | 3.17 | 5.41 | 4.75 | 4.82 | 8.45  | 9.42  | 9.12  | 9.6   | 4.17 |
| 28 | 4.6  | 6.79 | 6.11 | 5.11 | 8.2   | 9.38  | 9.43  | 9.88  | 4.7  |
| 29 | 4.72 | 5.83 | 5.87 | 5.46 | 8.55  | 9.81  | 8.94  | 9.53  | 4.22 |
| 30 | 1.9  | 6.29 | 5.36 | 5.36 | 9.38  | 10.04 | 10.04 | 10.94 | 5.07 |
| 31 | 6.62 | 7.25 | 7.15 | 5.08 | 7.69  | 4.57  | 7.87  | 7.99  | 6.66 |
| 32 | 6.65 | 7.46 | 7.02 | 4.42 | 8     | 6.63  | 8.72  | 9.36  | 7.43 |
| 33 | 6.97 | 7.92 | 7.15 | 5.84 | 8.32  | 4.59  | 7.15  | 7.45  | 7.21 |
| 34 | 7.26 | 7.56 | 7.24 | 5.04 | 7.92  | 4.86  | 7.91  | 8.03  | 6.6  |
| 35 | 5.09 | 6.81 | 6.11 | 4.36 | 7.64  | 8.34  | 8.35  | 9.33  | 5.4  |
| 36 | 5.66 | 6.96 | 6.43 | 4.66 | 7.15  | 7.86  | 8.75  | 9.38  | 5.96 |
| 37 | 5.72 | 7.24 | 6.59 | 4.9  | 6.94  | 7.78  | 8.61  | 9.76  | 6.01 |
| 38 | 5.45 | 6.96 | 6.35 | 4.78 | 7.52  | 7.92  | 9.08  | 9.93  | 5.97 |
| 39 | 1.35 | 6.11 | 5.75 | 5.56 | 8.44  | 9.59  | 8.98  | 9.77  | 3.16 |
| 40 | 5.55 | 8.37 | 6.51 | 5.55 | 10.07 | 11.06 | 11.62 | 10.97 | 6.27 |
| 41 | 2.42 | 7.03 | 6.85 | 6.49 | 8.84  | 10.34 | 10.84 | 12.13 | 4.33 |
| 42 | 2.23 | 9.13 | 8.16 | 6.69 | 8.36  | 9.92  | 12.58 | 13.7  | 5.23 |
| 43 | 6.28 | 7.78 | 6.43 | 5.58 | 9.27  | 9.86  | 10.01 | 10.29 | 5.12 |
| 44 | 4.51 | 9.87 | 7.51 | 6.1  | 7.97  | 9.15  | 13.54 | 13.59 | 4.51 |
| 45 | 5.45 | 8.02 | 6.65 | 5.94 | 9.93  | 10.05 | 11.22 | 11.23 | 4.78 |
| 46 | 5.02 | 8.51 | 6.88 | 5.89 | 9.54  | 9.85  | 12.16 | 11.59 | 4.84 |
| 47 | 6.11 | 4.59 | 5.81 | 5.07 | 8.41  | 10.74 | 9.64  | 10.32 | 6.38 |
| 48 | 5.41 | 7.05 | 6.66 | 5.48 | 8.51  | 10.41 | 10.67 | 11.3  | 6.46 |
| 49 | 5.36 | 6.45 | 5.49 | 5.6  | 8.42  | 10.66 | 10.09 | 11.19 | 6.36 |
| 50 | 6.06 | 7.22 | 6.83 | 6.01 | 8.38  | 9.73  | 9.88  | 10.9  | 6.83 |
| 51 | 3.96 | 7.19 | 6.33 | 5.64 | 9     | 9.3   | 9.79  | 10.43 | 0    |
| 52 | 5.11 | 7.52 | 6.31 | 5.23 | 8.68  | 8.55  | 8.52  | 10.12 | 5.17 |
| 53 | 5.26 | 7.38 | 6.04 | 5.12 | 8.21  | 8.33  | 8.67  | 10.02 | 5.23 |
| 54 |      |      |      |      |       |       |       |       |      |
| 55 |      |      |      |      |       |       |       |       |      |
| 56 |      |      |      |      |       |       |       |       |      |
| 57 |      |      |      |      |       |       |       |       |      |
| 58 |      |      |      |      |       |       |       |       |      |
| 59 |      |      |      |      |       |       |       |       |      |
| 60 |      |      |      |      |       |       |       |       |      |

<https://mc.manuscriptcentral.com/gut>

1  
2  
3  
4  
5  
6  
7  
8  
9  
10  
11  
12  
13  
14  
15  
16  
17  
18  
19  
20  
21  
22  
23  
24  
25  
26  
27  
28  
29  
30  
31  
32  
33  
34  
35  
36  
37  
38  
39  
40  
41  
42  
43  
44  
45  
46  
47  
48  
49  
50  
51  
52  
53  
54  
55  
56  
57  
58  
59  
60

|      |      |      |      |      |       |       |       |      |
|------|------|------|------|------|-------|-------|-------|------|
| 3.79 | 8.68 | 5.54 | 5.6  | 8.71 | 8.68  | 11.21 | 11.76 | 3.6  |
| 4.1  | 7.33 | 4.68 | 5.85 | 8.42 | 9.72  | 10.33 | 10.57 | 4.1  |
| 4.39 | 7.37 | 4.98 | 5.59 | 9.08 | 9.68  | 8.51  | 10.2  | 4.05 |
| 4.57 | 7.36 | 5.39 | 5.88 | 9.21 | 9.86  | 8.29  | 10.02 | 4.57 |
| 5.25 | 8.85 | 6.91 | 5.25 | 8.51 | 5.46  | 11.27 | 10.7  | 6.41 |
| 6.67 | 5.35 | 5.21 | 6.33 | 9.1  | 9.87  | 9.76  | 10.15 | 4.27 |
| 6.75 | 6.32 | 6.17 | 5.99 | 9.15 | 9.74  | 9.3   | 8.93  | 4.53 |
| 6.4  | 6.19 | 6.36 | 6.4  | 9.29 | 9.79  | 9.41  | 8.95  | 4.31 |
| 7.21 | 8.16 | 7.54 | 5.4  | 7.78 | 4.52  | 7.61  | 8.03  | 7.37 |
| 6.36 | 7.47 | 6.96 | 5.44 | 7.86 | 7.78  | 9.28  | 9.78  | 6.51 |
| 3.82 | 7.61 | 5.49 | 5.8  | 8.75 | 8.83  | 10.22 | 11.47 | 3.56 |
| 5.28 | 7.52 | 6.64 | 5.93 | 8.98 | 9.01  | 10.04 | 11.65 | 5.59 |
| 2.62 | 7.42 | 6.06 | 5.51 | 9.1  | 9.36  | 10.7  | 12.03 | 4    |
| 4.65 | 7.31 | 6.17 | 5.52 | 8.65 | 8.86  | 9.83  | 11.49 | 4.65 |
| 2.54 | 7.67 | 7.54 | 5.71 | 8.81 | 8.24  | 12.73 | 12.94 | 3.54 |
| 4.71 | 7.18 | 6.35 | 5.78 | 8.17 | 10.4  | 10.49 | 10.14 | 4.97 |
| 5.73 | 6.62 | 6.43 | 5.14 | 8.22 | 9.61  | 9.27  | 9.4   | 5.74 |
| 4.28 | 7.33 | 6    | 5.34 | 8.32 | 10.57 | 10.87 | 10.46 | 4.4  |

1  
2  
3  
4  
5  
6  
7  
8  
9  
10  
11  
12  
13  
14  
15  
16  
17  
18  
19  
20  
21  
22  
23  
24  
25  
26  
27  
28  
29  
30  
31  
32  
33  
34  
35  
36  
37  
38  
39  
40  
41  
42  
43  
44  
45  
46  
47  
48  
49  
50  
51  
52  
53  
54  
55  
56  
57  
58  
59  
60

| IBSP | ICAM1 | ID1   | ID2  | ID4  | IFNG | IGF1 | IGFBP4 | IGFBP7 |
|------|-------|-------|------|------|------|------|--------|--------|
| 5.34 | 7.91  | 9.33  | 7.23 | 8.41 | 6.67 | 7.72 | 9.8    | 11.59  |
| 4.64 | 8.46  | 10.44 | 7.73 | 7.47 | 6.16 | 6.56 | 10.01  | 11.75  |
| 4.89 | 8.41  | 10.32 | 7.46 | 7.47 | 6.06 | 6.84 | 10.09  | 11.26  |
| 2.76 | 9.57  | 9.89  | 8.18 | 9.07 | 3.35 | 8.63 | 12.27  | 13.01  |
| 7.2  | 7.67  | 8.84  | 7.45 | 8.16 | 7.88 | 7.71 | 7.26   | 4.82   |
| 5.19 | 8.89  | 10.23 | 8.05 | 8.44 | 6.3  | 6.63 | 9.98   | 10.92  |
| 5.38 | 9.1   | 11.04 | 8.23 | 8.73 | 6.17 | 6.38 | 10.22  | 11.12  |
| 2.39 | 10.13 | 10.91 | 8.79 | 8.91 | 4.3  | 6.93 | 11.44  | 12.35  |
| 3.69 | 9.33  | 8.87  | 8.23 | 8.49 | 3.17 | 6.01 | 10.6   | 12.87  |
| 4.3  | 8.93  | 9.44  | 7.21 | 8.08 | 5.58 | 5.86 | 9.38   | 10.95  |
| 4.19 | 9.11  | 9.92  | 8.35 | 7.54 | 3.19 | 4.7  | 10.29  | 11.34  |
| 3.27 | 10.15 | 10.07 | 7.72 | 8.89 | 3.68 | 6.85 | 11.74  | 12.05  |
| 4.8  | 7.59  | 11.31 | 8.46 | 7.86 | 5.84 | 6.65 | 10.22  | 10.73  |
| 5.23 | 8.43  | 11.13 | 8.52 | 7.82 | 6.21 | 6.9  | 11.14  | 11.36  |
| 3.35 | 9.26  | 9.91  | 9.18 | 8.6  | 3.35 | 9.35 | 12.53  | 13.26  |
| 4.85 | 8.99  | 9.95  | 8    | 8.97 | 6.43 | 7.67 | 10.35  | 12.26  |
| 5.38 | 8.47  | 10.51 | 7.83 | 8.6  | 6.42 | 7.04 | 10.46  | 11.73  |
| 5.81 | 8.5   | 10.01 | 7.57 | 8.7  | 6.62 | 7.61 | 10.67  | 12.02  |
| 2.9  | 9.59  | 10.95 | 9.15 | 8.36 | 5.48 | 8.62 | 11.78  | 12.82  |
| 1.63 | 9.65  | 11.7  | 9.2  | 8.17 | 5.33 | 6.34 | 11.43  | 12.07  |
| 2.08 | 9.8   | 10.92 | 9.21 | 8.54 | 5.73 | 8    | 12.06  | 12.53  |
| 2.73 | 7.52  | 11.05 | 9.17 | 8.42 | 1.73 | 7.45 | 11.69  | 13.06  |
| 4.29 | 7.53  | 11.1  | 9.07 | 8.59 | 2.2  | 7.85 | 11.54  | 12.55  |
| 3.59 | 7.76  | 11.43 | 9.02 | 8.92 | 2.7  | 8.26 | 12.27  | 13.2   |
| 2.43 | 8.17  | 10.28 | 9    | 7.59 | 4.51 | 5.67 | 10.63  | 10.42  |
| 0.13 | 9.24  | 12.1  | 8.05 | 8.1  | 2.94 | 5.34 | 9.73   | 10.99  |
| 1.52 | 8.67  | 12.22 | 8.11 | 8.03 | 2.52 | 5.33 | 9.72   | 10.85  |
| 3.62 | 8.83  | 11.64 | 7.6  | 8.3  | 5.98 | 6.22 | 9.79   | 10.72  |
| 4.56 | 7.05  | 10.73 | 8.07 | 8.08 | 6.37 | 7.05 | 9.03   | 11.08  |
| 4.23 | 8.04  | 9.74  | 7.81 | 7.67 | 5.92 | 7.52 | 11.12  | 11.33  |
| 4.1  | 7.32  | 9.8   | 8.13 | 7.34 | 6.2  | 6.48 | 10.28  | 10.91  |
| 5.46 | 7.37  | 9.7   | 7.81 | 7.99 | 6.96 | 8.08 | 10.64  | 11.48  |
| 6.17 | 8.84  | 8.36  | 8.42 | 8.22 | 6.29 | 6.94 | 9.67   | 10.76  |
| 4.15 | 8.55  | 9.42  | 8.14 | 8.4  | 3.23 | 6.72 | 11.7   | 13.39  |
| 3.78 | 8.29  | 10.16 | 7.42 | 7.68 | 1.93 | 5.86 | 10.96  | 12.35  |
| 3.93 | 8.26  | 9.59  | 7.86 | 8.42 | 2.47 | 7.91 | 12.15  | 13.1   |
| 1.45 | 9.28  | 8.86  | 8.34 | 7.21 | 5.25 | 5.8  | 9.57   | 11.46  |
| 1.73 | 9.86  | 9.61  | 7.82 | 5.71 | 5.93 | 6.21 | 10.67  | 10.41  |
| 1.37 | 9.63  | 8.92  | 8.37 | 6.12 | 6.07 | 7.31 | 11.16  | 10.94  |
| 2.07 | 9.38  | 8.64  | 8.13 | 6.14 | 6.19 | 7.11 | 11.05  | 10.85  |
| 5.1  | 7.62  | 9.49  | 6.85 | 6.87 | 6.42 | 7.17 | 9.72   | 10.9   |
| 5.45 | 7.24  | 9.34  | 7.06 | 7.27 | 6.86 | 6.85 | 9.67   | 9.89   |
| 4.86 | 7.43  | 8.68  | 6.92 | 7.23 | 6.5  | 6.73 | 9.44   | 9.64   |
| 4.46 | 7.86  | 9.49  | 7.03 | 6.91 | 5.94 | 5.86 | 9.49   | 10.12  |
| 3.86 | 7.25  | 6.95  | 8.5  | 8.03 | 2.86 | 6.32 | 10.29  | 11.79  |
| 2.64 | 6.91  | 9.57  | 7.45 | 8.02 | 1.9  | 6.58 | 10.38  | 11.15  |
| 2.32 | 7.34  | 8.68  | 7.47 | 7.67 | 2.32 | 7.43 | 11.14  | 12.17  |
| 2.39 | 7.25  | 8.45  | 7.51 | 8.34 | 2.13 | 7.35 | 11.49  | 12.74  |
| 2.63 | 9.22  | 12.05 | 8.69 | 9.46 | 4.54 | 7.92 | 11.86  | 12.95  |
| 3.71 | 9.94  | 11.24 | 8.28 | 8.68 | 4.47 | 5.99 | 11.24  | 12.45  |
| 3.67 | 9.76  | 11.65 | 8.94 | 7.84 | 4.82 | 6.02 | 10.48  | 11.65  |

<https://mc.manuscriptcentral.com/gut>



|    |      |       |       |      |       |      |      |       |       |
|----|------|-------|-------|------|-------|------|------|-------|-------|
| 1  |      |       |       |      |       |      |      |       |       |
| 2  | 4.47 | 10.1  | 10.85 | 8.64 | 9.08  | 5.4  | 7.61 | 11.4  | 12.74 |
| 3  | 3.73 | 7.18  | 11.48 | 8.87 | 8.28  | 5.7  | 6.28 | 10.01 | 11.77 |
| 4  | 5.19 | 7.92  | 11.56 | 8.91 | 8.26  | 6.07 | 6.79 | 10.59 | 11.74 |
| 5  | 4.2  | 7.7   | 11.47 | 8.94 | 7.33  | 5.81 | 6.68 | 10.58 | 11.28 |
| 6  | 4.43 | 7.76  | 11    | 9.12 | 7.88  | 5.87 | 6.79 | 10.84 | 11.77 |
| 7  |      |       |       |      |       |      |      |       |       |
| 8  | 3.23 | 8.11  | 9.91  | 8.53 | 7.52  | 4.48 | 6.71 | 10.61 | 12.29 |
| 9  | 1.83 | 7.54  | 10.64 | 8.64 | 7.33  | 1.83 | 5.2  | 10.82 | 12    |
| 10 | 2.7  | 6.26  | 9.21  | 8.46 | 6.62  | 2.17 | 4.09 | 10.23 | 11.09 |
| 11 | 2.02 | 7.46  | 9.42  | 8.72 | 8.54  | 2.44 | 5.3  | 11.15 | 12.55 |
| 12 | 3.83 | 7.79  | 8.92  | 7.25 | 6.63  | 3.75 | 6.23 | 10.09 | 10.95 |
| 13 | 0.54 | 8.35  | 10.97 | 7.95 | 7.76  | 3.13 | 5.19 | 10.28 | 11.26 |
| 14 | 2.99 | 7.9   | 10.73 | 8.1  | 6.16  | 2.82 | 4.67 | 10.38 | 11.15 |
| 15 | 2.98 | 7.66  | 9.9   | 7.96 | 6.79  | 2.79 | 6.59 | 10.84 | 11.46 |
| 16 | 6.74 | 9.15  | 10.47 | 7.47 | 9.61  | 6.74 | 8.15 | 7.96  | 9.61  |
| 17 | 6.9  | 10.6  | 10.46 | 8.53 | 8.6   | 6.92 | 7.04 | 10.15 | 11.22 |
| 18 | 6.32 | 10.28 | 9.97  | 8.63 | 8.16  | 7.59 | 6.97 | 9.58  | 10.89 |
| 19 | 8.95 | 7.67  | 9.96  | 7.66 | 9.81  | 8.47 | 8.6  | 7.62  | 2.24  |
| 20 | 8.45 | 7.67  | 9.88  | 7.68 | 9.68  | 7.9  | 8.48 | 7.89  | 6.23  |
| 21 | 5.18 | 7.63  | 12.11 | 8.12 | 6.87  | 5.95 | 6.27 | 9.47  | 10.28 |
| 22 | 5.02 | 7.49  | 12.83 | 8.65 | 6.98  | 6.19 | 6.05 | 9.05  | 9.57  |
| 23 | 5.1  | 7.9   | 12.34 | 8.52 | 7.19  | 6.33 | 6.95 | 9.76  | 10.01 |
| 24 | 1.42 | 7.99  | 9.97  | 9.19 | 8.83  | 2.27 | 8.34 | 11.98 | 12.64 |
| 25 | 3.6  | 7.62  | 9.7   | 8.96 | 8.39  | 5.09 | 7.78 | 11.54 | 12.31 |
| 26 | 5.3  | 7.53  | 9     | 8.6  | 8.04  | 6.8  | 8.12 | 11.53 | 12.79 |
| 27 | 3.81 | 8.65  | 12.01 | 8.69 | 8.63  | 3.64 | 6.03 | 10.81 | 11.21 |
| 28 | 4.04 | 8.88  | 11.8  | 8.98 | 8.85  | 4.74 | 5.8  | 11.21 | 11.62 |
| 29 | 2.28 | 8.89  | 11.09 | 9.06 | 8.07  | 4.78 | 6.73 | 11.59 | 11.38 |
| 30 | 5    | 10.32 | 9.92  | 8.39 | 7.37  | 6.77 | 6.73 | 10.3  | 10.82 |
| 31 | 4.89 | 9.95  | 9.57  | 8.64 | 7.5   | 6.09 | 6.92 | 10.75 | 11.24 |
| 32 | 5.2  | 9.91  | 9.02  | 8.44 | 7.37  | 6.69 | 7.38 | 10.85 | 10.88 |
| 33 | 5.54 | 8.64  | 13.56 | 9.29 | 10.12 | 6.94 | 8.46 | 11.1  | 12.53 |
| 34 | 5.37 | 7.68  | 12.06 | 8.77 | 7.99  | 6.11 | 6.77 | 10.26 | 11.41 |
| 35 | 5.03 | 7.54  | 12.59 | 9.04 | 7.9   | 6.92 | 7.44 | 10.33 | 11.24 |
| 36 | 5.05 | 8.11  | 10.66 | 7.58 | 7.46  | 6.72 | 6.99 | 10.9  | 11.74 |
| 37 | 5.24 | 8.49  | 10.74 | 7.74 | 7.45  | 6.76 | 7.12 | 10.33 | 11.36 |
| 38 | 5.48 | 9.04  | 10.8  | 7.38 | 7.83  | 6.88 | 8.42 | 11.53 | 11.86 |
| 39 | 5.76 | 8.67  | 9.8   | 7.71 | 8.41  | 6.94 | 7.86 | 10.79 | 11.71 |
| 40 | 5.76 | 8.67  | 9.8   | 7.71 | 8.41  | 6.94 | 7.86 | 10.79 | 11.71 |
| 41 | 5.7  | 7.59  | 11.51 | 7.6  | 8.09  | 6.72 | 7.04 | 10.51 | 11.45 |
| 42 | 6.11 | 8.22  | 11.43 | 7.99 | 8.56  | 6.91 | 7.98 | 11.51 | 11.81 |
| 43 | 5.75 | 8.15  | 10.92 | 7.95 | 8.89  | 6.62 | 8.4  | 11.14 | 12.41 |
| 44 | 6.41 | 8.83  | 8.76  | 7.97 | 7.6   | 7.47 | 7.38 | 8.7   | 10.42 |
| 45 | 5.72 | 9.21  | 10.85 | 8.8  | 8.37  | 6.84 | 7.03 | 10.54 | 11.93 |
| 46 | 4.85 | 8.38  | 11.48 | 8.78 | 8.66  | 6.58 | 6.91 | 10.12 | 11.31 |
| 47 | 5.93 | 8.28  | 9.92  | 8.5  | 8.32  | 7.46 | 8.13 | 10.93 | 11.84 |
| 48 | 2.05 | 8.57  | 10.43 | 8.44 | 8.11  | 3.19 | 6.66 | 11.4  | 12.55 |
| 49 | 0.08 | 7.91  | 11.83 | 8.86 | 6.97  | 0.08 | 5.43 | 11.6  | 11.5  |
| 50 | 2.84 | 8.69  | 10.89 | 8.63 | 7.42  | 3.32 | 7.04 | 11.72 | 12.36 |
| 51 | 5.94 | 7.71  | 8.82  | 7.28 | 7.75  | 7.28 | 7.48 | 10    | 11.21 |
| 52 | 5.54 | 8.17  | 9.16  | 7.57 | 8.78  | 7.07 | 8.63 | 12.26 | 12.58 |
| 53 | 5.04 | 7.92  | 8.46  | 8.03 | 8.23  | 6.78 | 7.3  | 11.66 | 12.86 |
| 54 | 5.68 | 7.37  | 9.55  | 7.75 | 7.62  | 6.64 | 6.37 | 9.49  | 10.84 |

|    |      |      |       |      |       |      |      |       |       |
|----|------|------|-------|------|-------|------|------|-------|-------|
| 1  |      |      |       |      |       |      |      |       |       |
| 2  | 5.53 | 7.7  | 9.34  | 7.52 | 7.85  | 6.52 | 6.15 | 10.06 | 11.2  |
| 3  | 7.29 | 7.38 | 8.87  | 7.64 | 8.23  | 7.59 | 7.98 | 10.78 | 11.64 |
| 4  | 5.37 | 8.26 | 10.81 | 8.32 | 8.66  | 4.89 | 6.09 | 10.12 | 12.37 |
| 5  | 4.66 | 8.45 | 10.91 | 7.98 | 9.27  | 3.08 | 7.61 | 12.18 | 12.26 |
| 6  | 4.81 | 8.4  | 9.73  | 8.41 | 9.52  | 3.08 | 8.6  | 12.49 | 13.17 |
| 7  | 1.99 | 9.21 | 10.27 | 8.37 | 8.25  | 3.73 | 8.75 | 11.61 | 12.91 |
| 8  | 3.55 | 8.6  | 10.8  | 8.95 | 7.41  | 3.01 | 4.94 | 10.28 | 11.83 |
| 9  | 4    | 9.13 | 10.34 | 8.41 | 7.82  | 2.93 | 5.91 | 11.01 | 11.99 |
| 10 | 4.08 | 9.38 | 10.42 | 8.8  | 8.4   | 4.08 | 9.62 | 12.36 | 13.75 |
| 11 | 0.79 | 8.32 | 9.55  | 8.46 | 8.13  | 3.6  | 6.11 | 10.61 | 12.84 |
| 12 | 0.49 | 7.93 | 10.39 | 8.4  | 6.97  | 2.08 | 5.08 | 9.6   | 11.31 |
| 13 | 5.1  | 7.26 | 10.26 | 8.07 | 6.89  | 6.12 | 5.41 | 8.61  | 10.17 |
| 14 | 2.26 | 8.45 | 8.78  | 8.33 | 8.17  | 2.26 | 9.41 | 12.36 | 13.34 |
| 15 | 6.5  | 8.9  | 9.52  | 7.75 | 8.45  | 8.46 | 8.24 | 7.66  | 2.01  |
| 16 | 5.73 | 8.55 | 8.73  | 7.17 | 7.53  | 3.27 | 4.7  | 10.16 | 11.66 |
| 17 | 5.72 | 8.64 | 8.86  | 7.05 | 7.17  | 1.83 | 4.16 | 10.35 | 11.51 |
| 18 | 4.43 | 8.47 | 8.66  | 7.49 | 7.49  | 3.1  | 6.22 | 10.76 | 11.65 |
| 19 | 2.43 | 9.62 | 11.66 | 8.61 | 8.66  | 6.46 | 5.11 | 10.61 | 10.19 |
| 20 | 5.83 | 9.1  | 10.82 | 7.96 | 8.09  | 6.78 | 6.22 | 10.37 | 10.29 |
| 21 | 5.68 | 9.75 | 11.01 | 8.2  | 8.4   | 6.61 | 6.11 | 10.72 | 10.97 |
| 22 | 5.16 | 7.75 | 8.86  | 5.16 | 7.16  | 5.16 | 9.07 | 11.54 | 12.12 |
| 23 | 1.46 | 8.23 | 12.3  | 8.58 | 6.42  | 3.22 | 3.94 | 9.43  | 10.78 |
| 24 | 3.12 | 8.55 | 11.41 | 8.65 | 6.99  | 2.86 | 5.58 | 10.39 | 11.17 |
| 25 | 2.18 | 8.27 | 10.68 | 8.74 | 8.65  | 2.18 | 7.11 | 11    | 12.94 |
| 26 | 2.91 | 8.44 | 10.12 | 8.76 | 8.52  | 1.91 | 8.14 | 12.16 | 13.35 |
| 27 | 1.54 | 9.01 | 10.08 | 8.68 | 9.67  | 0.54 | 9.97 | 12.19 | 13.64 |
| 28 | 6.72 | 7.5  | 8.52  | 6.9  | 8.08  | 7.67 | 8.08 | 9.26  | 9.09  |
| 29 | 6.5  | 7.49 | 8.57  | 7.37 | 8.09  | 8    | 7.86 | 7.18  | 0.86  |
| 30 | 6.57 | 7.23 | 8.18  | 7.12 | 7.5   | 8.07 | 7.44 | 7.65  | 6.02  |
| 31 | 2.01 | 7.89 | 10.25 | 6.83 | 8.37  | 3.18 | 6.84 | 10.44 | 12.72 |
| 32 | 0.59 | 7.59 | 9.08  | 6.4  | 8.49  | 0    | 8.15 | 11.87 | 12.23 |
| 33 | 0.11 | 7.75 | 9.91  | 7.28 | 7.91  | 0.11 | 8.2  | 11.39 | 12.05 |
| 34 | 2.16 | 8.89 | 9.81  | 8.25 | 10.21 | 2.16 | 9.13 | 11.96 | 13.22 |
| 35 | 6.09 | 7.01 | 8.22  | 6.75 | 7.32  | 7.42 | 7.61 | 8.62  | 9.39  |
| 36 | 5.57 | 6.69 | 8.21  | 5.92 | 6.36  | 6.97 | 6.68 | 7.08  | 7.86  |
| 37 | 5.25 | 6.41 | 8.68  | 6.5  | 7.11  | 6.91 | 6.9  | 7.23  | 8.53  |
| 38 | 7.06 | 6.32 | 8.47  | 6.89 | 8.14  | 7.25 | 7.29 | 6.78  | 0     |
| 39 | 6.24 | 6.58 | 7.44  | 6.58 | 7.12  | 6.73 | 7.34 | 7.56  | 7.53  |
| 40 | 5.8  | 6.71 | 7.65  | 6.1  | 6.9   | 7.25 | 7.33 | 8.64  | 9.04  |
| 41 | 5.86 | 6.68 | 7.42  | 6.68 | 6.61  | 7.04 | 7.59 | 8.84  | 9     |
| 42 | 8.5  | 5.22 | 8.05  | 5.87 | 9.03  | 5    | 6.22 | 7.87  | 8.5   |
| 43 | 6.64 | 7.61 | 8.85  | 7.55 | 8.17  | 7.93 | 8.25 | 7.99  | 8.69  |
| 44 | 7.1  | 7.57 | 9.06  | 7.85 | 8.22  | 8.37 | 8.34 | 7.66  | 2.65  |
| 45 | 5.77 | 8.72 | 9.92  | 7.44 | 7.34  | 7.36 | 7.24 | 8.57  | 10.14 |
| 46 | 6.7  | 7.83 | 8.83  | 7.1  | 7.98  | 7.81 | 7.85 | 8.52  | 8.6   |
| 47 | 6.4  | 8.1  | 7.98  | 7.08 | 8.03  | 7.28 | 8.23 | 10.89 | 11.36 |
| 48 | 6.27 | 7.78 | 8.48  | 7.09 | 8.3   | 7.88 | 8.48 | 10.46 | 9.41  |
| 49 | 6.51 | 7.54 | 8.18  | 7.5  | 8.06  | 8.14 | 7.6  | 8.58  | 3.71  |
| 50 | 7.67 | 7.61 | 8.73  | 7.41 | 8.86  | 7.9  | 9.09 | 11.41 | 9.62  |
| 51 | 5.61 | 7.08 | 7.05  | 6.73 | 7.16  | 6.94 | 6.2  | 8.76  | 10.45 |
| 52 | 5.77 | 7.46 | 6.69  | 7.09 | 6.63  | 6.85 | 5.39 | 8.91  | 10.19 |
| 53 | 5.21 | 7.53 | 7.4   | 6.99 | 6.94  | 6.76 | 6.89 | 9.48  | 10.08 |

<https://mc.manuscriptcentral.com/gut>

|    |      |      |       |      |      |      |       |       |       |
|----|------|------|-------|------|------|------|-------|-------|-------|
| 1  |      |      |       |      |      |      |       |       |       |
| 2  | 6    | 7.39 | 7.31  | 7.01 | 7.68 | 7.14 | 7.01  | 9.07  | 10.16 |
| 3  | 4.1  | 8.87 | 11.24 | 8.02 | 8.76 | 6.04 | 8.2   | 10.63 | 11.98 |
| 4  | 4.86 | 8.09 | 10.96 | 8.16 | 8.57 | 6.58 | 7.65  | 11.3  | 11.42 |
| 5  | 4.65 | 7.82 | 11.1  | 7.36 | 7.68 | 6.7  | 6.7   | 9.33  | 10.65 |
| 6  | 5.04 | 7.96 | 11.56 | 7.5  | 7.33 | 6.43 | 6.82  | 9.28  | 10.62 |
| 7  | 6.1  | 8.95 | 10.78 | 8.28 | 8.42 | 6.79 | 7.65  | 11.7  | 12.33 |
| 8  | 4.43 | 9.6  | 11.62 | 8.8  | 8.56 | 4.54 | 8.93  | 12.71 | 12.48 |
| 9  | 3.79 | 9.59 | 12.07 | 8.26 | 8.25 | 3.44 | 7.93  | 11.83 | 11.77 |
| 10 | 4.74 | 9.19 | 9.81  | 9.17 | 9.06 | 3.91 | 10.37 | 13.63 | 13.24 |
| 11 | 6.22 | 8.86 | 12.7  | 8.22 | 8.92 | 4.35 | 5.76  | 11.24 | 12.93 |
| 12 | 5.49 | 8.81 | 10.88 | 8.86 | 8.94 | 4.92 | 7.18  | 11.48 | 12.74 |
| 13 | 4.38 | 9.35 | 11.45 | 8.83 | 8.86 | 4.97 | 6.38  | 11.39 | 12.88 |
| 14 | 5.42 | 8.56 | 11.08 | 8.77 | 8.72 | 3.87 | 6.52  | 11.32 | 12.62 |
| 15 | 4.52 | 8.7  | 9.02  | 8.25 | 8.51 | 5.82 | 6.34  | 9.25  | 12.36 |
| 16 | 1.83 | 9.42 | 11.29 | 9.18 | 7.92 | 3.21 | 5.98  | 10.67 | 12.03 |
| 17 | 5.32 | 9.17 | 9.28  | 8.49 | 8.74 | 6.27 | 8.42  | 12.04 | 13.23 |
| 18 | 0    | 8.44 | 9.38  | 8.56 | 8.57 | 3.17 | 8.79  | 11.94 | 12.9  |
| 19 | 2.67 | 7.95 | 10.23 | 8.52 | 7.73 | 1.67 | 6.88  | 11.1  | 12.07 |
| 20 | 3.52 | 8.39 | 9.78  | 8.63 | 8.68 | 3.1  | 7.62  | 12.12 | 13.05 |
| 21 | 0.93 | 7.74 | 9     | 8.25 | 8.47 | 1.51 | 7.7   | 11.16 | 12.26 |
| 22 | 2.54 | 8.72 | 10.64 | 9.03 | 7.49 | 3.63 | 5.35  | 11.25 | 11.73 |
| 23 | 2.06 | 7.24 | 12.21 | 8.84 | 7.29 | 1.48 | 4.69  | 10.83 | 11.02 |
| 24 | 5.19 | 7.9  | 11.44 | 7.83 | 8.35 | 6.23 | 6.6   | 10.62 | 11.83 |
| 25 | 4.51 | 7.77 | 11.08 | 8.1  | 7.82 | 6.02 | 6.54  | 10.23 | 11.63 |
| 26 | 4.74 | 9.42 | 11.62 | 8.44 | 9.13 | 4.74 | 9.26  | 12.78 | 13.97 |
| 27 | 0.36 | 7.83 | 6.49  | 7.22 | 6.61 | 2.36 | 5.53  | 9.03  | 11.08 |
| 28 | 4.25 | 8.01 | 9.12  | 7.33 | 7.97 | 3.79 | 6.77  | 10.4  | 11.08 |
| 29 | 4.46 | 7.77 | 7.51  | 7.42 | 6.55 | 3.46 | 4.16  | 9.34  | 11    |
| 30 | 1.9  | 8.5  | 7.9   | 6.36 | 8.39 | 4.71 | 6.99  | 11.24 | 11.57 |
| 31 | 6.01 | 6.57 | 7.57  | 5.85 | 6.71 | 7.15 | 7.18  | 7.69  | 6.93  |
| 32 | 4.89 | 6.3  | 7.81  | 6.36 | 6.95 | 6.95 | 6.87  | 9.27  | 8.72  |
| 33 | 5.74 | 6.64 | 7.69  | 6.77 | 6.79 | 7.24 | 7.26  | 6.69  | 3.21  |
| 34 | 5.54 | 6.42 | 7.3   | 6.66 | 6.91 | 7.19 | 7.28  | 8.46  | 7.93  |
| 35 | 4.06 | 6.89 | 9.85  | 6.64 | 7.26 | 5.79 | 5.87  | 7.61  | 10.39 |
| 36 | 4.47 | 7.11 | 8.29  | 6.52 | 6.96 | 6.14 | 6.72  | 8.75  | 9.73  |
| 37 | 4.29 | 7.24 | 7.9   | 6.6  | 7.18 | 6.07 | 6.57  | 9.56  | 10.77 |
| 38 | 4.66 | 8.09 | 8.16  | 6.88 | 7.73 | 6.11 | 7.47  | 9.97  | 11.26 |
| 39 | 1.35 | 9.24 | 6.71  | 8.09 | 7.08 | 3.81 | 6.5   | 9.92  | 11.34 |
| 40 | 4.46 | 7.77 | 11.75 | 7.27 | 8.89 | 3.78 | 6.16  | 10.29 | 11.36 |
| 41 | 2    | 9.28 | 12.07 | 8.58 | 6.99 | 3.74 | 6.35  | 10.17 | 11.48 |
| 42 | 3.23 | 8.97 | 9.71  | 8.59 | 7.19 | 4.82 | 8.86  | 11.96 | 12.54 |
| 43 | 4.84 | 7.57 | 8.72  | 8.04 | 7.9  | 5.31 | 6.84  | 10.2  | 11.65 |
| 44 | 4.51 | 9.55 | 10.1  | 7.68 | 5.51 | 6.51 | 9.46  | 12.16 | 12.72 |
| 45 | 0.87 | 7.96 | 9.32  | 7.95 | 7.91 | 3.19 | 7.82  | 11.42 | 11.64 |
| 46 | 1.94 | 7.59 | 8.45  | 8.64 | 8.34 | 1.94 | 6.73  | 11.46 | 12.05 |
| 47 | 3.68 | 6.27 | 9.69  | 9.61 | 4.49 | 1.68 | 2.68  | 8.17  | 9.01  |
| 48 | 4.23 | 8.75 | 10.13 | 9.17 | 7.02 | 5.41 | 7.08  | 10.77 | 11.41 |
| 49 | 3.45 | 8.03 | 10.36 | 9.22 | 7.48 | 3.45 | 6.92  | 10.98 | 10.97 |
| 50 | 4.06 | 8.11 | 10.07 | 8.69 | 7.43 | 5.5  | 7.23  | 10.94 | 11.09 |
| 51 | 1.16 | 7.69 | 9.36  | 7.38 | 8.12 | 1.57 | 6.68  | 10.58 | 12.12 |
| 52 | 3.7  | 6.79 | 7.97  | 7.04 | 7.39 | 4.7  | 6.46  | 10.61 | 11.28 |
| 53 | 4.29 | 7.21 | 8.11  | 6.77 | 7.58 | 5.39 | 6.52  | 10.39 | 11.1  |
| 54 |      |      |       |      |      |      |       |       |       |
| 55 |      |      |       |      |      |      |       |       |       |
| 56 |      |      |       |      |      |      |       |       |       |
| 57 |      |      |       |      |      |      |       |       |       |
| 58 |      |      |       |      |      |      |       |       |       |
| 59 |      |      |       |      |      |      |       |       |       |
| 60 |      |      |       |      |      |      |       |       |       |

|      |      |       |      |      |      |      |       |       |
|------|------|-------|------|------|------|------|-------|-------|
| 0.79 | 6.94 | 7.77  | 7.25 | 7.86 | 0.79 | 8.03 | 11.77 | 12.09 |
| 3.42 | 6.49 | 10.63 | 6.85 | 9.28 | 4.56 | 6.85 | 10.22 | 13.01 |
| 3.39 | 7.17 | 11.15 | 6.44 | 7    | 4.59 | 5.49 | 9.46  | 10.83 |
| 2.07 | 6.27 | 11.33 | 6.75 | 7.01 | 3.95 | 5.24 | 8.99  | 10.81 |
| 5.46 | 6.51 | 9.09  | 6.46 | 7.44 | 6.91 | 7.48 | 10.08 | 10.54 |
| 4.15 | 8.74 | 11.02 | 8.29 | 7.42 | 3.02 | 6.85 | 10.45 | 11.14 |
| 2.65 | 8.43 | 7.08  | 8.2  | 5.54 | 2.39 | 4.53 | 9.52  | 9.64  |
| 3.26 | 8.46 | 7.45  | 8.39 | 5.13 | 3.05 | 3.67 | 9.57  | 9.46  |
| 6.27 | 6.66 | 8.29  | 6.81 | 7.53 | 7.54 | 7.34 | 6.46  | 0.27  |
| 5.41 | 7.2  | 9.03  | 7.11 | 7.68 | 6.83 | 7.34 | 10.13 | 10.48 |
| 0    | 7.27 | 8.92  | 7.65 | 7.52 | 1.97 | 6.56 | 10.47 | 12.76 |
| 3.47 | 7.19 | 8.66  | 7.25 | 6.89 | 5.06 | 7.21 | 10.78 | 12.13 |
| 1.89 | 7.08 | 8.65  | 7.45 | 7.65 | 0.3  | 7.82 | 11.17 | 12.52 |
| 3.45 | 7.23 | 8.24  | 7.37 | 8.82 | 4.71 | 8.64 | 11.72 | 13.25 |
| 2.54 | 8.43 | 11.33 | 6.24 | 7.45 | 4.13 | 8.61 | 11.85 | 12.92 |
| 3.89 | 8.19 | 7.84  | 7.53 | 6.68 | 5.16 | 6.44 | 10.36 | 10.58 |
| 4.82 | 7.78 | 8.15  | 7.07 | 6.89 | 5.46 | 6.77 | 10.01 | 9.97  |
| 2.34 | 7.98 | 7.63  | 7.69 | 6.48 | 4.84 | 6.55 | 10.57 | 10.73 |

1  
2  
3  
4  
5  
6  
7  
8  
9  
10  
11  
12  
13  
14  
15  
16  
17  
18  
19  
20  
21  
22  
23  
24  
25  
26  
27  
28  
29  
30  
31  
32  
33  
34  
35  
36  
37  
38  
39  
40  
41  
42  
43  
44  
45  
46  
47  
48  
49  
50  
51  
52  
53  
54  
55  
56  
57  
58  
59  
60

| IL10RA | IL11 | IL13RA2 | IL15 | IL18 | IL1A | IL1B  | IL1RL1 | IL1RN |
|--------|------|---------|------|------|------|-------|--------|-------|
| 8.78   | 6.2  | 5.58    | 6.9  | 7.85 | 6.12 | 6.92  | 6.5    | 7.04  |
| 8.05   | 7.19 | 4.69    | 6.31 | 7.5  | 6.6  | 7.75  | 7.12   | 9.36  |
| 7.92   | 6.08 | 5.4     | 6.19 | 7.88 | 7.2  | 7.43  | 6.67   | 10.27 |
| 8.11   | 8.4  | 5.13    | 5.88 | 7.46 | 4.43 | 9.82  | 6.73   | 9.69  |
| 8.36   | 7.45 | 6.05    | 7.83 | 8.84 | 7.38 | 8.21  | 7.16   | 7.71  |
| 8.22   | 6.26 | 4.3     | 6.48 | 7.4  | 5.78 | 7.63  | 5.66   | 7.11  |
| 8.36   | 6.79 | 4.83    | 6.6  | 7.65 | 6.05 | 9.17  | 5.85   | 7.61  |
| 8.78   | 5.39 | 1.39    | 6.7  | 8.25 | 3.2  | 7.14  | 4.39   | 7.49  |
| 9.28   | 2.69 | 1.95    | 6.07 | 8.59 | 2.69 | 6.43  | 3.83   | 4.76  |
| 7.59   | 5.98 | 4.08    | 6.86 | 7.52 | 6.54 | 7.94  | 6.32   | 7.33  |
| 7.86   | 3.96 | 0.38    | 5.24 | 7.8  | 4.29 | 7.78  | 5.74   | 7.01  |
| 8.3    | 3    | 0.68    | 5.89 | 7.28 | 6.21 | 8.76  | 5.68   | 7.85  |
| 7.62   | 6.57 | 4.58    | 6.17 | 7.21 | 6.5  | 9.35  | 6.14   | 7.79  |
| 8.28   | 6.92 | 5.46    | 6.32 | 7.46 | 6.83 | 10.08 | 5.8    | 8.47  |
| 9.59   | 2.77 | 1.77    | 6.94 | 8.99 | 3.77 | 5.58  | 2.77   | 5.58  |
| 8.99   | 6.92 | 4.85    | 7.32 | 8.31 | 6.72 | 8.72  | 6.26   | 7.79  |
| 8.2    | 6.2  | 5.81    | 6.72 | 8.66 | 5.38 | 7.22  | 6.33   | 9.32  |
| 8.24   | 6.43 | 4.67    | 7.33 | 8.94 | 6.35 | 7.61  | 6.46   | 7.6   |
| 9.9    | 2.9  | 1.9     | 6.97 | 9.21 | 3.07 | 6.05  | 4.85   | 7.05  |
| 9.28   | 6.25 | 2.48    | 6.32 | 8.65 | 2.31 | 7.45  | 5.72   | 6.71  |
| 9.98   | 4.54 | 2.5     | 6.88 | 8.57 | 2.5  | 6.7   | 5.02   | 6.44  |
| 7.98   | 6.75 | 4.47    | 5.15 | 6.56 | 2.96 | 4.47  | 5.88   | 6.96  |
| 7.53   | 7.11 | 5.84    | 5.06 | 6.48 | 2.52 | 5.24  | 6.26   | 7.33  |
| 7.79   | 5.22 | 4.8     | 5.14 | 6.55 | 2.48 | 4.42  | 6.34   | 7.16  |
| 8.21   | 2.75 | 1.43    | 4.51 | 6.15 | 2.43 | 4.95  | 1.43   | 5.64  |
| 7.16   | 4.59 | 4.13    | 4.77 | 7.35 | 4.04 | 8.64  | 5.86   | 8.1   |
| 6.93   | 3.69 | 2.11    | 4.98 | 7.39 | 5.43 | 8.77  | 5.04   | 8.27  |
| 8.03   | 6.29 | 5.44    | 6    | 7.97 | 5.94 | 9.12  | 6.26   | 8.22  |
| 7.97   | 6.05 | 5.05    | 6.45 | 7.49 | 5.56 | 6.95  | 5.25   | 6.77  |
| 8.48   | 7.07 | 5.61    | 6.87 | 7.85 | 6.31 | 9.01  | 6.06   | 7.96  |
| 7.68   | 6.59 | 5.52    | 6.24 | 7.38 | 5.62 | 9.16  | 6      | 7.36  |
| 8.56   | 6.71 | 6.07    | 6.86 | 8.37 | 6.32 | 7.25  | 6.1    | 7.52  |
| 10.05  | 5.76 | 4.81    | 7.46 | 8.12 | 5.69 | 8.82  | 6.65   | 7     |
| 8.23   | 6.67 | 2.38    | 5.31 | 6.31 | 4.45 | 9.34  | 5.61   | 6.67  |
| 8.03   | 8.17 | 3.78    | 4.93 | 6.54 | 4.97 | 9.84  | 7.57   | 7.38  |
| 8.54   | 3.64 | 2.47    | 5.11 | 6.76 | 2.47 | 5.56  | 5.79   | 5.23  |
| 9.26   | 2.45 | 0.45    | 6.49 | 8.62 | 3.25 | 7.33  | 3.25   | 6.09  |
| 8.87   | 7.84 | 4.73    | 6.31 | 7.68 | 7.15 | 11.25 | 4.4    | 9.53  |
| 9.55   | 6.94 | 3.37    | 6.76 | 7.76 | 4.61 | 8.55  | 4.17   | 6.59  |
| 9.45   | 3.74 | 2.74    | 6.51 | 7.74 | 3.44 | 6.1   | 3.65   | 6.43  |
| 7.92   | 6.49 | 5.07    | 6.24 | 7.47 | 6.49 | 7.31  | 6.17   | 7.29  |
| 7.1    | 6.53 | 5.29    | 5.83 | 7.44 | 6.61 | 7.42  | 6.24   | 7.41  |
| 7.09   | 6.68 | 5.12    | 6.05 | 7.31 | 6.92 | 7.37  | 6.56   | 7.38  |
| 7.34   | 5.17 | 4.21    | 5.43 | 6.96 | 5.77 | 6.64  | 5.7    | 6.82  |
| 7.81   | 2.86 | 4.45    | 6.18 | 6.86 | 3.86 | 5.18  | 4.45   | 6.32  |
| 7.85   | 5.02 | 3.12    | 5.12 | 6.4  | 2.64 | 6.02  | 5.77   | 5.31  |
| 7.72   | 5.55 | 4.52    | 4.7  | 6.52 | 1    | 5.39  | 5.17   | 4.58  |
| 7.94   | 4.76 | 2.98    | 4.85 | 6.33 | 2.13 | 4.67  | 5.27   | 4.27  |
| 9.29   | 3.63 | 0.63    | 7.04 | 7.99 | 4.63 | 7.13  | 4.88   | 6.78  |
| 8.5    | 8.04 | 4.59    | 6.49 | 7.59 | 5.53 | 10.75 | 4.4    | 8.94  |
| 8.46   | 6.25 | 5.25    | 6.68 | 8.07 | 3.82 | 8.5   | 3.95   | 7.39  |

<https://mc.manuscriptcentral.com/gut>

1  
2  
3  
4  
5  
6  
7  
8  
9  
10  
11  
12  
13  
14  
15  
16  
17  
18  
19  
20  
21  
22  
23  
24  
25  
26  
27  
28  
29  
30  
31  
32  
33  
34  
35  
36  
37  
38  
39  
40  
41  
42  
43  
44  
45  
46  
47  
48  
49  
50  
51  
52  
53  
54  
55  
56  
57  
58  
59  
60

|       |      |      |      |      |      |       |      |      |
|-------|------|------|------|------|------|-------|------|------|
| 9.06  | 4.25 | 4.66 | 6.38 | 7.71 | 3.78 | 8.52  | 4.78 | 7.55 |
| 7.7   | 6.54 | 4.49 | 6.26 | 7.93 | 5.35 | 7.04  | 5.96 | 7.44 |
| 7.53  | 8.28 | 5.36 | 6.74 | 7.94 | 6.1  | 8     | 6.05 | 7.35 |
| 7.28  | 7.87 | 5.16 | 6.67 | 7.75 | 5.74 | 8     | 5.98 | 7.04 |
| 7.96  | 6.8  | 4.61 | 6.83 | 7.65 | 5.94 | 6.86  | 5.9  | 7.17 |
| 9.28  | 3.93 | 3.04 | 6.66 | 9.2  | 3.55 | 7.54  | 4.75 | 8.18 |
| 7.82  | 4.5  | 3.57 | 5.38 | 8.39 | 2.25 | 7.18  | 5.25 | 8.33 |
| 6.23  | 3.91 | 3.32 | 5.46 | 8.78 | 3    | 6.84  | 4.39 | 8.18 |
| 8.05  | 3.02 | 3.02 | 5.19 | 7.9  | 3.02 | 5.65  | 5.14 | 7.64 |
| 8.62  | 2.75 | 2.17 | 5.54 | 6.15 | 2.39 | 3.9   | 2.75 | 4.44 |
| 8.84  | 5.71 | 6.27 | 5.5  | 6.59 | 3.54 | 8.74  | 5.59 | 7.46 |
| 8.27  | 4.14 | 5.79 | 4.99 | 6.24 | 3.72 | 7.65  | 4.72 | 6.31 |
| 8.59  | 0.98 | 2.3  | 5.62 | 5.81 | 1.98 | 5.59  | 4.3  | 5.88 |
| 10.51 | 6.74 | 5.15 | 7.47 | 9.4  | 6.15 | 8.61  | 7.15 | 8.32 |
| 9.36  | 6.72 | 4.49 | 7.83 | 9.15 | 6.28 | 9.38  | 6.98 | 8.77 |
| 8.88  | 7.3  | 5.03 | 7.42 | 8.61 | 6.52 | 8.36  | 6.62 | 8.12 |
| 9.77  | 8.44 | 6.83 | 9.32 | 9.65 | 7.9  | 9.85  | 8.48 | 8.99 |
| 9.42  | 8.23 | 6.02 | 9.03 | 9.23 | 7.52 | 9.65  | 8.35 | 9.05 |
| 6.95  | 5.95 | 4.39 | 6.53 | 7.51 | 6.07 | 8.06  | 5.66 | 8.22 |
| 6.66  | 5.97 | 4.82 | 6.66 | 7.34 | 6.14 | 9.07  | 5.51 | 8.91 |
| 7.82  | 6.55 | 5.06 | 6.85 | 7.9  | 6.16 | 8.17  | 5.94 | 7.93 |
| 8.07  | 6.39 | 2.56 | 5.71 | 7.14 | 5.16 | 6.17  | 6.21 | 8.68 |
| 7.61  | 5.98 | 3.86 | 6.03 | 6.99 | 5.77 | 6.55  | 6.37 | 8.08 |
| 7.92  | 6.72 | 5.22 | 7.05 | 7.78 | 6.63 | 7.26  | 6.51 | 6.09 |
| 9.19  | 6.49 | 2.96 | 6.64 | 8.32 | 2.96 | 7.59  | 7.38 | 7.94 |
| 8.69  | 8.29 | 4.5  | 6.25 | 8.54 | 3.95 | 7.56  | 7.07 | 7.64 |
| 8.44  | 6.01 | 3.01 | 6.47 | 8.22 | 1.69 | 5.45  | 5.73 | 7.21 |
| 8.55  | 8.43 | 5.94 | 6.09 | 7.59 | 6.7  | 9.19  | 5.88 | 7.24 |
| 8.24  | 8.25 | 4.98 | 6.15 | 7.17 | 6.52 | 9.26  | 5.89 | 7.45 |
| 8.69  | 6.97 | 5.68 | 6.56 | 7.87 | 6.32 | 7.86  | 5.61 | 6.91 |
| 8.03  | 6.82 | 5.58 | 7.15 | 7.82 | 6.82 | 7.65  | 6.66 | 7.57 |
| 7.8   | 6.41 | 5.66 | 6.84 | 7.82 | 6.56 | 7.23  | 6.31 | 7.63 |
| 8.03  | 6.97 | 6.08 | 6.9  | 8.05 | 7.09 | 7.35  | 6.76 | 7.95 |
| 7.99  | 6.93 | 5.61 | 7.02 | 8.03 | 6.19 | 6.95  | 6.22 | 7.11 |
| 7.94  | 7.26 | 5.61 | 7.1  | 8.2  | 6.3  | 9.54  | 6.58 | 8.61 |
| 8.16  | 6.98 | 5.48 | 6.91 | 7.78 | 6.17 | 7.75  | 6.15 | 7.64 |
| 8.98  | 7.16 | 5.3  | 7.24 | 8.24 | 7.1  | 7.63  | 6.76 | 7.38 |
| 8.98  | 7.16 | 5.3  | 7.24 | 8.24 | 7.1  | 7.63  | 6.76 | 7.38 |
| 7.98  | 6.72 | 4.85 | 7.15 | 7.62 | 6.26 | 7.28  | 6.81 | 7.7  |
| 8.11  | 7.06 | 5.53 | 7.4  | 8.36 | 6.67 | 7.84  | 7.26 | 7.77 |
| 7.86  | 6.78 | 5.44 | 7.31 | 7.74 | 6.72 | 7.29  | 6.49 | 7.11 |
| 9.16  | 7.36 | 5.8  | 7.47 | 8.44 | 7.34 | 8.3   | 6.98 | 7.41 |
| 8.04  | 8.86 | 6.34 | 6.81 | 8.88 | 8.23 | 11.16 | 7.04 | 9.89 |
| 7.71  | 8.27 | 6.34 | 6.76 | 9.22 | 6.9  | 9.13  | 6.84 | 8.22 |
| 8.35  | 7.33 | 5.82 | 7.6  | 8.84 | 7.34 | 8.04  | 6.93 | 7.47 |
| 7.6   | 7.15 | 2.31 | 5.37 | 7.51 | 3.31 | 7.08  | 4.59 | 6.59 |
| 5.83  | 7.13 | 3.08 | 4.78 | 7.51 | 3.98 | 7.41  | 4.66 | 7.24 |
| 8.18  | 4.52 | 0.52 | 5.69 | 8.51 | 3.52 | 7.27  | 3.69 | 8.01 |
| 8.6   | 6.69 | 6.4  | 7.35 | 8.7  | 7.17 | 7.75  | 6.6  | 7.11 |
| 8.1   | 6.87 | 6.39 | 7.14 | 8.53 | 6.87 | 7.23  | 6.86 | 7.69 |
| 8.06  | 6.69 | 6.24 | 6.95 | 8.2  | 7.17 | 7.49  | 6.63 | 7.06 |
| 7.62  | 7.18 | 6.18 | 7.03 | 7.83 | 6.57 | 7.24  | 6.46 | 6.87 |

<https://mc.manuscriptcentral.com/gut>

|    |      |      |      |      |       |      |       |      |       |
|----|------|------|------|------|-------|------|-------|------|-------|
| 1  |      |      |      |      |       |      |       |      |       |
| 2  | 7.52 | 7.06 | 6.3  | 6.84 | 7.74  | 6.72 | 8.18  | 6.52 | 7.41  |
| 3  | 7.9  | 7.77 | 7.2  | 8.07 | 7.98  | 7    | 7.95  | 7.17 | 7.34  |
| 4  | 9.58 | 4.71 | 3.49 | 7.05 | 8.41  | 4.1  | 7.74  | 5.74 | 7.01  |
| 5  | 8.52 | 6.76 | 4.88 | 6.97 | 9.06  | 6.82 | 7.9   | 7.11 | 11.03 |
| 6  | 8.84 | 4.3  | 3.49 | 6.53 | 8.11  | 2.81 | 6.13  | 6.79 | 5.62  |
| 7  | 9.45 | 2.73 | 2.41 | 6.56 | 8.05  | 3.58 | 6.71  | 4.49 | 7.41  |
| 8  | 7.34 | 7.89 | 3.94 | 5.16 | 7.52  | 5.99 | 10.32 | 4.64 | 7.16  |
| 9  | 7.28 | 7.7  | 4.51 | 4.97 | 7.72  | 6.31 | 9.56  | 4.93 | 6.89  |
| 10 | 8.11 | 2.49 | 2.49 | 6.89 | 9.8   | 5.95 | 8.02  | 2.49 | 7.2   |
| 11 | 9.12 | 3.11 | 0.79 | 6.04 | 7.73  | 3.79 | 6.55  | 3.6  | 6.08  |
| 12 | 8.02 | 7.49 | 2.81 | 5.7  | 6.56  | 3.66 | 6.53  | 3.95 | 6.08  |
| 13 | 7.56 | 6.79 | 5.18 | 6.75 | 7.38  | 6.32 | 6.79  | 5.94 | 6.56  |
| 14 | 8.49 | 5.07 | 2.26 | 7.12 | 8.28  | 3.85 | 4.58  | 3.85 | 7.02  |
| 15 | 8.83 | 7.46 | 6.61 | 7.94 | 9.47  | 8.63 | 9.32  | 8.27 | 9.27  |
| 16 | 5.9  | 8.09 | 3.12 | 4.47 | 6.36  | 3.53 | 7.65  | 3.75 | 7.58  |
| 17 | 5.79 | 7.96 | 4.36 | 3    | 6.36  | 3.54 | 7.37  | 3.83 | 7.67  |
| 18 | 6.43 | 5.35 | 2.52 | 4.61 | 6.5   | 3.1  | 6.73  | 3.33 | 7.66  |
| 19 | 9.35 | 4.72 | 0.43 | 6.58 | 7.62  | 3.24 | 6.59  | 5.19 | 6.94  |
| 20 | 8.74 | 5.79 | 4.52 | 7.3  | 7.78  | 5.11 | 6.88  | 5.55 | 6.85  |
| 21 | 9.22 | 5.75 | 4.04 | 7.11 | 7.96  | 3.72 | 6.69  | 5.15 | 6.96  |
| 22 | 7.75 | 5.16 | 6.16 | 7.16 | 10.29 | 7.16 | 6.16  | 6.16 | 7.49  |
| 23 | 7.14 | 6.9  | 5.42 | 4.89 | 7.76  | 3.46 | 9.21  | 4.63 | 7.03  |
| 24 | 8.68 | 4.54 | 3.54 | 5.58 | 7.81  | 1.54 | 6.84  | 5.39 | 6.94  |
| 25 | 7.13 | 5.35 | 2.18 | 5.5  | 9.22  | 3.18 | 5.18  | 5.09 | 5.18  |
| 26 | 7.86 | 3.91 | 3.23 | 5.61 | 9.58  | 3.23 | 4.37  | 4.91 | 4.91  |
| 27 | 8.66 | 4.45 | 1.54 | 5.35 | 8.82  | 2.13 | 4.63  | 5.07 | 5.07  |
| 28 | 8.35 | 7.67 | 7.13 | 7.88 | 8.54  | 7.82 | 8.16  | 7.26 | 8.13  |
| 29 | 8.34 | 7.92 | 7.27 | 8.01 | 8.79  | 7.64 | 8.11  | 6.99 | 8.37  |
| 30 | 8.09 | 7.79 | 6.98 | 8.09 | 8.59  | 7.96 | 8.19  | 7.44 | 7.19  |
| 31 | 8.17 | 1.01 | 1.59 | 5.1  | 6.16  | 1.01 | 5.44  | 3.92 | 5.18  |
| 32 | 7.48 | 7.28 | 0    | 4.8  | 5.21  | 2.91 | 8.48  | 4.59 | 6.77  |
| 33 | 7.69 | 5.81 | 2.69 | 4.2  | 5.72  | 1.11 | 6.84  | 4.5  | 6.62  |
| 34 | 8.08 | 3.74 | 1.16 | 4.55 | 6.16  | 0.16 | 6.2   | 5.33 | 4.74  |
| 35 | 7.96 | 7.01 | 5.66 | 7.25 | 8.07  | 6.6  | 7.66  | 6.15 | 7.64  |
| 36 | 7.13 | 7.02 | 5.3  | 6.99 | 7.95  | 6.94 | 7.52  | 6.18 | 7.39  |
| 37 | 7.17 | 6.6  | 4.55 | 6.77 | 7.54  | 6.67 | 7.1   | 5.99 | 7.23  |
| 38 | 8.33 | 7.29 | 5.35 | 7.61 | 7.92  | 6.82 | 8.63  | 7.18 | 7.63  |
| 39 | 7.51 | 7.24 | 5.98 | 7.17 | 8.32  | 6.79 | 7.46  | 6.46 | 7.34  |
| 40 | 7.07 | 7    | 5.68 | 7    | 8.06  | 6.74 | 7.59  | 6.45 | 7.38  |
| 41 | 7.59 | 7.13 | 5.74 | 6.74 | 7.96  | 6.91 | 7.36  | 6.12 | 7.18  |
| 42 | 9.68 | 6.32 | 4    | 6.93 | 7.05  | 6.73 | 10.01 | 7.5  | 5.22  |
| 43 | 8.49 | 7.8  | 6.58 | 7.93 | 8.84  | 7.76 | 8.4   | 7.18 | 8.5   |
| 44 | 8.72 | 8.92 | 6.57 | 8.12 | 9.26  | 8.17 | 8.84  | 7.4  | 8.51  |
| 45 | 7.47 | 7.76 | 5.67 | 7.38 | 8.86  | 7.22 | 7.69  | 5.95 | 8.33  |
| 46 | 8.36 | 8.21 | 5.96 | 7.82 | 8.76  | 7.6  | 8.34  | 7.07 | 7.98  |
| 47 | 8.13 | 7.2  | 5.66 | 7.34 | 7.97  | 7.03 | 7.79  | 6.51 | 7.54  |
| 48 | 7.87 | 7.79 | 6.63 | 7.28 | 8.48  | 7.92 | 8.29  | 7.28 | 8.15  |
| 49 | 7.78 | 8.02 | 6.46 | 7.68 | 8.36  | 7.89 | 8.46  | 7.2  | 7.8   |
| 50 | 8.41 | 7.91 | 6.15 | 7.82 | 8.32  | 7.58 | 8.82  | 7.2  | 7.86  |
| 51 | 7.77 | 5.77 | 5.27 | 6.32 | 6.96  | 6.48 | 7.15  | 6.18 | 6.1   |
| 52 | 7.59 | 6.91 | 4.5  | 6.1  | 6.71  | 6.98 | 8.3   | 6.36 | 6.81  |
| 53 | 7.94 | 7    | 5.08 | 6.5  | 7.35  | 6.97 | 8.37  | 6.28 | 7.89  |

1  
2  
3  
4  
5  
6  
7  
8  
9  
10  
11  
12  
13  
14  
15  
16  
17  
18  
19  
20  
21  
22  
23  
24  
25  
26  
27  
28  
29  
30  
31  
32  
33  
34  
35  
36  
37  
38  
39  
40  
41  
42  
43  
44  
45  
46  
47  
48  
49  
50  
51  
52  
53  
54  
55  
56  
57  
58  
59  
60

|       |      |      |      |       |      |       |      |      |
|-------|------|------|------|-------|------|-------|------|------|
| 7.99  | 6.18 | 5.08 | 6.13 | 7.22  | 7.21 | 7.69  | 6.59 | 7.77 |
| 8.88  | 5.56 | 4.22 | 6.69 | 7.71  | 6.1  | 8.23  | 6.27 | 7.04 |
| 8.41  | 8.32 | 4.41 | 6.64 | 7.59  | 6.16 | 9.42  | 6.46 | 7.6  |
| 7.39  | 7.12 | 4.83 | 6.5  | 7.25  | 6.67 | 8.71  | 6.36 | 8.05 |
| 7.91  | 6.04 | 4.27 | 6.36 | 7.29  | 6.31 | 8.19  | 6.2  | 7.93 |
| 9.48  | 6.49 | 6.09 | 7.56 | 8.63  | 6.55 | 7.99  | 6.12 | 7.54 |
| 8.98  | 6.6  | 4.65 | 6.51 | 8.72  | 4.16 | 7.85  | 5.93 | 9.06 |
| 8.97  | 6.21 | 4.5  | 6.17 | 8.1   | 3.15 | 8.18  | 6.42 | 8.92 |
| 10.07 | 4.2  | 1.74 | 7.22 | 8.15  | 2.74 | 6.39  | 5.7  | 7.31 |
| 8.57  | 4.67 | 2.76 | 6.52 | 8.24  | 4.46 | 6.49  | 5.16 | 7.19 |
| 8.46  | 5.25 | 4.41 | 6.67 | 7.72  | 4.41 | 7.86  | 5.63 | 7    |
| 8.75  | 8.3  | 4.63 | 6.59 | 8.09  | 5.78 | 10.84 | 5.63 | 8.22 |
| 7.88  | 3.87 | 4.06 | 6.17 | 7.29  | 3.97 | 6.74  | 4.65 | 6.96 |
| 8.39  | 5.38 | 3.73 | 6.3  | 8.19  | 5.95 | 6.25  | 6.51 | 7.97 |
| 7.91  | 5.29 | 4.76 | 4.51 | 7.36  | 2.83 | 6.83  | 7.06 | 8.44 |
| 8.57  | 6.08 | 4.6  | 7.04 | 8.08  | 6.08 | 6.57  | 6.43 | 7.82 |
| 9.71  | 2.58 | 2    | 6.52 | 7.63  | 1    | 5.93  | 5.32 | 6.96 |
| 7.92  | 5.31 | 3.84 | 5.37 | 7.04  | 3.47 | 8.05  | 5.37 | 8.4  |
| 8.64  | 4.1  | 3.52 | 5.95 | 6.82  | 2.52 | 6.63  | 5.04 | 7.74 |
| 8.99  | 1.93 | 0.93 | 6.12 | 6.79  | 1.51 | 5.06  | 4.32 | 6.72 |
| 6.24  | 8.58 | 5.3  | 4.54 | 6.29  | 6.36 | 9.88  | 3.94 | 7.88 |
| 5.48  | 6.79 | 1.8  | 4    | 5.92  | 5.34 | 8.21  | 4.18 | 5.95 |
| 8.87  | 6.72 | 5.28 | 6.89 | 7.45  | 5.86 | 7.08  | 7.6  | 7.33 |
| 8.11  | 6.6  | 5.32 | 6.71 | 7.47  | 5.25 | 6.36  | 7.04 | 7.56 |
| 8.51  | 4.74 | 3.15 | 7.32 | 8.67  | 3.15 | 6.96  | 5.96 | 8.51 |
| 8.85  | 0.36 | 0.36 | 5.27 | 7.06  | 0.36 | 5.32  | 2.36 | 3.53 |
| 8.17  | 5.38 | 2.79 | 5.7  | 6.49  | 3.11 | 7.69  | 6.43 | 6.08 |
| 7.7   | 5.26 | 3.57 | 5.05 | 5.62  | 2.09 | 5.93  | 5.29 | 5.65 |
| 8.36  | 3.48 | 3.9  | 4.9  | 5.22  | 1.9  | 6.07  | 4.71 | 5.6  |
| 7.87  | 7.22 | 6.62 | 6.62 | 7.97  | 6.8  | 7.43  | 5.85 | 7.18 |
| 7.45  | 8.07 | 5.97 | 6.3  | 7.74  | 7.09 | 7.39  | 6    | 7.15 |
| 7.72  | 7.79 | 6.61 | 6.74 | 7.98  | 6.95 | 7.6   | 6.24 | 7.24 |
| 7.51  | 7.66 | 6.54 | 6.48 | 7.84  | 7.11 | 7.48  | 6.17 | 7.26 |
| 7.4   | 5.4  | 4.49 | 5.72 | 7.27  | 4.82 | 6.34  | 4.72 | 5.31 |
| 7.14  | 6.81 | 5.22 | 6.44 | 7.13  | 5.71 | 6.83  | 5.42 | 6.44 |
| 6.93  | 6.78 | 4.94 | 6.48 | 7.08  | 5.55 | 7.42  | 5.26 | 6.16 |
| 7.32  | 6.03 | 5.32 | 6.4  | 7.2   | 5.49 | 7.06  | 5.72 | 6.59 |
| 9.76  | 2.35 | 1.35 | 7.14 | 8.2   | 2.35 | 7.25  | 3.35 | 3.81 |
| 8.13  | 6.55 | 4.27 | 6.27 | 7.63  | 4.78 | 6.78  | 6.16 | 6.46 |
| 8.66  | 6.55 | 2.42 | 6.2  | 8.68  | 3.23 | 7.61  | 5.97 | 8.93 |
| 8.91  | 6.76 | 2.23 | 7.72 | 10.07 | 4.23 | 6.48  | 4.23 | 9.66 |
| 8.59  | 5.69 | 3.24 | 6.36 | 7.45  | 5.04 | 6.43  | 5.15 | 6.98 |
| 8.6   | 4.51 | 5.51 | 7.32 | 9.68  | 4.51 | 7.1   | 6.1  | 8.32 |
| 8.45  | 5.48 | 3.19 | 5.6  | 6.66  | 2.19 | 7.29  | 5.68 | 6.89 |
| 7.97  | 4.52 | 1.94 | 5.52 | 7.02  | 2.26 | 5.89  | 4.52 | 6.7  |
| 5.81  | 2.68 | 2.68 | 3.85 | 7.59  | 1.68 | 4.14  | 1.68 | 4.27 |
| 8.29  | 5.6  | 3.57 | 6.07 | 8.01  | 4.07 | 7.04  | 4.68 | 6.34 |
| 7.75  | 3.6  | 1.28 | 4.92 | 7.19  | 2.6  | 5.7   | 3.74 | 5.08 |
| 8.33  | 6.09 | 4.34 | 6.32 | 7.89  | 5.68 | 6.87  | 5.39 | 6.61 |
| 8.61  | 1.16 | 0.57 | 5.91 | 5.68  | 0    | 6.35  | 2.38 | 4.16 |
| 7.32  | 5.78 | 4.7  | 5.23 | 5.95  | 4.62 | 6.14  | 5.23 | 5.7  |
| 7.66  | 5.54 | 4.48 | 5.96 | 6.17  | 4.96 | 6.37  | 5.83 | 6.29 |

<https://mc.manuscriptcentral.com/gut>



1  
2  
3  
4  
5  
6  
7  
8  
9  
10  
11  
12  
13  
14  
15  
16  
17  
18  
19  
20  
21  
22  
23  
24  
25  
26  
27  
28  
29  
30  
31  
32  
33  
34  
35  
36  
37  
38  
39  
40  
41  
42  
43  
44  
45  
46  
47  
48  
49  
50  
51  
52  
53  
54  
55  
56  
57  
58  
59  
60

|      |      |      |      |      |      |      |      |      |
|------|------|------|------|------|------|------|------|------|
| 7.49 | 2.37 | 1.79 | 5.88 | 5.11 | 1.79 | 2.37 | 2.37 | 3.37 |
| 6.93 | 4.56 | 3.42 | 5.42 | 6.56 | 4.8  | 6.27 | 4.1  | 6.27 |
| 6.23 | 8.12 | 4.49 | 4.49 | 7.2  | 4.49 | 8.35 | 5.23 | 6.72 |
| 6.04 | 5.39 | 4.07 | 5.13 | 6.66 | 3.49 | 5.81 | 5.07 | 5.39 |
| 7.91 | 7.51 | 5.55 | 7.17 | 8.78 | 6.98 | 7.66 | 6.25 | 7.86 |
| 8.4  | 5.21 | 1.57 | 5.27 | 5.61 | 2.15 | 5.87 | 4.27 | 5.47 |
| 7.15 | 1.65 | 0    | 5.51 | 5.3  | 2.24 | 6.15 | 2.87 | 4.46 |
| 6.84 | 1.67 | 0.35 | 5.91 | 5.28 | 0.94 | 6.66 | 1.67 | 4.56 |
| 7.79 | 7.51 | 5.83 | 7.43 | 8.16 | 7.76 | 8.24 | 7.21 | 7.92 |
| 8.2  | 7.12 | 5.01 | 6.73 | 7.76 | 6.37 | 7.67 | 6.24 | 7.18 |
| 8.77 | 1.65 | 0.65 | 6.03 | 7.17 | 2.24 | 5.14 | 4.35 | 6.52 |
| 8.08 | 6.1  | 3.7  | 6.14 | 7.77 | 4.98 | 6.62 | 5.64 | 7    |
| 8.23 | 4    | 1.3  | 5.73 | 6.86 | 2.62 | 5.16 | 6.16 | 6.08 |
| 8.78 | 4.52 | 4.3  | 5.88 | 7.13 | 4.03 | 5.93 | 5.96 | 6.06 |
| 7.97 | 4.87 | 2.54 | 6.94 | 9.61 | 4.54 | 8.94 | 3.54 | 6    |
| 8.5  | 5.73 | 3.5  | 5.47 | 7.76 | 3.26 | 6.12 | 5.12 | 5.5  |
| 8.15 | 6.26 | 4.82 | 5.8  | 7.19 | 5.42 | 9.07 | 6.09 | 6.18 |
| 8.53 | 4.8  | 2.92 | 5.43 | 8.01 | 2.07 | 5.75 | 4.61 | 5.11 |

1  
2  
3  
4  
5  
6  
7  
8  
9  
10  
11  
12  
13  
14  
15  
16  
17  
18  
19  
20  
21  
22  
23  
24  
25  
26  
27  
28  
29  
30  
31  
32  
33  
34  
35  
36  
37  
38  
39  
40  
41  
42  
43  
44  
45  
46  
47  
48  
49  
50  
51  
52  
53  
54  
55  
56  
57  
58  
59  
60

| IL6  | ILK  | INHBA | INHBE | IRF6 | ISL1 | ISLR  | ITGA1 | ITGA11 |
|------|------|-------|-------|------|------|-------|-------|--------|
| 4.56 | 6.86 | 5.51  | 6.73  | 8    | 7.19 | 7.76  | 8.09  | 7.27   |
| 5.86 | 7.87 | 5.59  | 5.77  | 9.26 | 6.36 | 7.12  | 9.4   | 7.06   |
| 2.89 | 7.64 | 5.25  | 6.39  | 9.46 | 6.57 | 6.84  | 8.77  | 7.19   |
| 8.25 | 8.76 | 7.85  | 1.76  | 9.39 | 5.73 | 8.96  | 9.76  | 9.02   |
| 2.01 | 2.01 | 5.53  | 8.14  | 8.56 | 8.66 | 8.4   | 1.01  | 2.59   |
| 4.98 | 7.41 | 7.42  | 6.19  | 7.96 | 7.18 | 8.08  | 8.99  | 8.56   |
| 6.53 | 7.38 | 7.53  | 6.26  | 7.98 | 6.81 | 7.63  | 9.06  | 7.9    |
| 5.25 | 7.86 | 8.89  | 2.98  | 8.16 | 5.98 | 9.43  | 9.52  | 9.4    |
| 5.98 | 8.34 | 8.18  | 0.37  | 7.15 | 4.17 | 9.08  | 9.55  | 9.47   |
| 3.82 | 7.75 | 7.19  | 5.72  | 8.41 | 6.37 | 7.31  | 8.4   | 8.57   |
| 3.96 | 8.22 | 7.41  | 1.38  | 8.61 | 5.67 | 7.25  | 9.23  | 8.48   |
| 6    | 8.8  | 8.01  | 2.68  | 8.52 | 6.07 | 7.96  | 9.35  | 8.65   |
| 4.43 | 8.02 | 5.69  | 5.66  | 9.62 | 7.01 | 7.26  | 7.96  | 7.61   |
| 5.67 | 8.37 | 7.01  | 6.13  | 9.06 | 7.2  | 8.36  | 8.48  | 9.43   |
| 6.16 | 8.74 | 8.32  | 1.77  | 9.05 | 6.67 | 10.43 | 8.61  | 9.64   |
| 7.45 | 8.39 | 6.78  | 6.85  | 8.36 | 6.85 | 8.62  | 8.95  | 7.42   |
| 4.29 | 8.43 | 7.24  | 5.99  | 9.21 | 7.73 | 9.18  | 9.03  | 8.37   |
| 5.62 | 8.63 | 8.08  | 6.38  | 8.51 | 7.3  | 9.64  | 8.98  | 9.12   |
| 5.85 | 8.68 | 7.14  | 2.22  | 8.07 | 5.73 | 8.76  | 9.51  | 8.8    |
| 6.2  | 9.15 | 6.63  | 0.89  | 8.58 | 5.92 | 7.78  | 9.79  | 8.71   |
| 7.14 | 9.3  | 6.71  | 1.5   | 7.81 | 6.83 | 8.34  | 9.98  | 8.33   |
| 3.32 | 9.49 | 7.4   | 2.15  | 9.28 | 8.19 | 8.52  | 10.32 | 9.02   |
| 3.2  | 9.28 | 6.35  | 2.2   | 9.75 | 8.35 | 7.78  | 9.96  | 7.75   |
| 4.98 | 9.85 | 8.03  | 2.22  | 9.15 | 8.35 | 8.76  | 10.81 | 8.61   |
| 5.47 | 8.66 | 4.6   | 4.33  | 6.71 | 4.01 | 6.65  | 7.93  | 5.75   |
| 4.13 | 8.61 | 4.13  | 1.71  | 8.91 | 4.04 | 5.04  | 8.62  | 5.91   |
| 3.52 | 8.38 | 3.84  | 3.84  | 8.95 | 5.28 | 5.47  | 8.5   | 6.01   |
| 4.16 | 8.12 | 4.77  | 5.89  | 8.88 | 6.34 | 6.71  | 8.26  | 5.98   |
| 4.45 | 7.08 | 5.5   | 6.44  | 8.47 | 6.44 | 6.95  | 8.05  | 6.99   |
| 6.88 | 6.63 | 6.18  | 6.11  | 8.3  | 7.2  | 7.53  | 8.29  | 6.68   |
| 5.33 | 7.41 | 6.37  | 6.41  | 8.36 | 6.85 | 7.43  | 8.11  | 6.35   |
| 3.03 | 6.99 | 5.61  | 6.96  | 8.37 | 7.31 | 8.07  | 7.86  | 6.96   |
| 6.5  | 7.31 | 4.2   | 6.09  | 6.87 | 7.53 | 6.76  | 7.67  | 4.2    |
| 6.53 | 9.16 | 8.44  | 2.06  | 7.39 | 7.52 | 10.36 | 10.54 | 9.74   |
| 7.34 | 8.53 | 7.7   | 1.2   | 7.97 | 6.27 | 8.71  | 9.99  | 8.73   |
| 5.06 | 8.78 | 7.71  | 2.47  | 7.21 | 7.42 | 10.11 | 9.98  | 9.22   |
| 5.84 | 8.19 | 6.09  | 1.45  | 7.21 | 4.84 | 7.23  | 8.38  | 7.12   |
| 6.2  | 8.07 | 6.95  | 1.4   | 8.12 | 4.69 | 7.17  | 8.38  | 6.87   |
| 5.89 | 8.12 | 6.65  | 3.17  | 7.22 | 5.45 | 8.3   | 8.74  | 7.61   |
| 4.74 | 8.17 | 5.79  | 2.33  | 7.19 | 5.77 | 7.78  | 8.92  | 7.19   |
| 4.32 | 6.91 | 6.65  | 6.28  | 7.63 | 6.48 | 7.5   | 7.49  | 8.38   |
| 3.9  | 7.09 | 6.67  | 6.51  | 7.7  | 6.5  | 7.8   | 7.59  | 8.78   |
| 3.39 | 6.59 | 6.56  | 6.33  | 7.79 | 6.5  | 7.49  | 7.29  | 8.42   |
| 3.14 | 7.56 | 6.86  | 5.75  | 7.82 | 5.62 | 7.54  | 7.66  | 8.96   |
| 2.86 | 6.67 | 6.03  | 4.86  | 8.11 | 3.86 | 8.84  | 6.67  | 6.95   |
| 1.9  | 8.33 | 4.71  | 2.64  | 8.27 | 6.79 | 6.93  | 8.6   | 7.17   |
| 2.81 | 8.23 | 6.49  | 0     | 8.13 | 6.13 | 8.04  | 9.02  | 8.06   |
| 4.13 | 8.74 | 7.66  | 0     | 7.67 | 6.79 | 9.34  | 9.34  | 9.34   |
| 6.9  | 9.04 | 8.09  | 3.63  | 8.58 | 5.68 | 9.11  | 9.06  | 9.34   |
| 7.42 | 8.82 | 8.45  | 2.33  | 8.61 | 5.94 | 8.39  | 9.32  | 10.06  |
| 5.25 | 8.93 | 7.26  | 2.5   | 8.39 | 6.4  | 8.06  | 9.19  | 8.99   |

<https://mc.manuscriptcentral.com/gut>

|    |      |      |      |      |       |      |      |      |      |
|----|------|------|------|------|-------|------|------|------|------|
| 1  |      |      |      |      |       |      |      |      |      |
| 2  | 6.97 | 9.08 | 8.22 | 2.08 | 8.34  | 6.34 | 8.87 | 9.84 | 10.1 |
| 3  | 5.16 | 7.71 | 5.84 | 5.86 | 9.77  | 6.05 | 7.65 | 8.29 | 7.54 |
| 4  | 5.89 | 7.81 | 6.82 | 5.89 | 9.2   | 6.14 | 7.77 | 8.86 | 7.18 |
| 5  | 5.93 | 8.08 | 7.2  | 5.88 | 9.25  | 6.12 | 7.61 | 8.65 | 6.92 |
| 6  | 4.43 | 8.19 | 6.36 | 6.27 | 8.94  | 6.86 | 8.3  | 8.57 | 7.14 |
| 7  | 5.66 | 8.83 | 4.93 | 4.32 | 8.73  | 5.48 | 7.47 | 8.92 | 7.71 |
| 8  | 2.57 | 9.04 | 6.59 | 2.57 | 8.94  | 5.92 | 7.49 | 9.09 | 7.81 |
| 9  | 2.59 | 8.58 | 5.36 | 2.17 | 9.32  | 4.88 | 6.18 | 8.26 | 7.21 |
| 10 | 3.9  | 9.05 | 6.48 | 2.44 | 8.49  | 7.21 | 8.33 | 9.53 | 8.06 |
| 11 | 2.9  | 8.4  | 5.28 | 2.39 | 9.17  | 5.77 | 6.93 | 9.24 | 6.04 |
| 12 | 3.86 | 8.59 | 5.63 | 1.54 | 9.1   | 6.59 | 7.3  | 9.14 | 6.73 |
| 13 | 3.99 | 8.55 | 5.79 | 3.27 | 9.45  | 6.54 | 7.18 | 8.88 | 6.8  |
| 14 | 3.79 | 8.56 | 6.09 | 0    | 9.18  | 6.73 | 7.83 | 9.15 | 7.13 |
| 15 | 5.15 | 6.74 | 6.15 | 5.15 | 7.96  | 6.74 | 8.15 | 7.15 | 5.15 |
| 16 | 4.7  | 7.33 | 8.65 | 6.57 | 8.69  | 7.66 | 9.04 | 7.16 | 8.13 |
| 17 | 4.77 | 7.36 | 7.99 | 7.46 | 8.57  | 7.78 | 8.7  | 7.54 | 8.22 |
| 18 | 1.24 | 1.24 | 7.23 | 8.96 | 9.21  | 9.25 | 9.03 | 0.24 | 0.24 |
| 19 | 1.77 | 0.77 | 7.04 | 8.28 | 8.99  | 9.14 | 8.97 | 1.77 | 2.77 |
| 20 | 3.95 | 7.58 | 5.39 | 5.89 | 9.05  | 7.29 | 6.57 | 8.47 | 5.95 |
| 21 | 4.35 | 7.41 | 4.51 | 6.14 | 9.47  | 7.5  | 6.04 | 8.16 | 4.58 |
| 22 | 5.48 | 7.28 | 5.98 | 6.39 | 9.16  | 7.73 | 7.1  | 7.94 | 6.71 |
| 23 | 6.58 | 9.01 | 6.53 | 0    | 10.06 | 5.86 | 8.23 | 9.43 | 8.34 |
| 24 | 4.09 | 8.77 | 6.23 | 5.03 | 10.02 | 6.64 | 7.83 | 9.13 | 7.72 |
| 25 | 5.22 | 8.22 | 6.18 | 6.48 | 9.49  | 7.41 | 8.08 | 9.01 | 7.91 |
| 26 | 4.44 | 8.51 | 5.64 | 3.22 | 9.63  | 6.7  | 7.31 | 9.5  | 8    |
| 27 | 6.58 | 8.7  | 7.59 | 2.04 | 9.65  | 6.6  | 8.39 | 9.96 | 9.16 |
| 28 | 5.21 | 8.8  | 7.08 | 1.69 | 9.64  | 7.23 | 8.27 | 9.76 | 8.98 |
| 29 | 8.08 | 8.54 | 7.15 | 6.45 | 8.19  | 6.82 | 7.73 | 8.32 | 7.09 |
| 30 | 8.02 | 8.8  | 7.2  | 6.13 | 8.21  | 6.85 | 8.21 | 8.84 | 7.07 |
| 31 | 6.75 | 8.31 | 6.34 | 6.72 | 8.23  | 7.15 | 7.99 | 8.27 | 6.89 |
| 32 | 8.52 | 8.23 | 6.29 | 6.75 | 9.16  | 7.27 | 8.39 | 9.48 | 7.61 |
| 33 | 2.2  | 8.06 | 5.24 | 6.64 | 9.3   | 7.36 | 7.36 | 9.2  | 6.83 |
| 34 | 2.99 | 8.11 | 6.35 | 6.97 | 9.32  | 7.81 | 7.72 | 9.01 | 7.29 |
| 35 | 3.9  | 8.42 | 7.7  | 6.52 | 8.53  | 7.47 | 9.31 | 8.77 | 8.28 |
| 36 | 5.24 | 8.17 | 7.3  | 6.83 | 8.63  | 7.4  | 8.63 | 8.1  | 8.18 |
| 37 | 6.97 | 8.57 | 8.19 | 6.83 | 8.6   | 7.39 | 8.86 | 8.46 | 8.49 |
| 38 | 5.93 | 7.36 | 6.68 | 6.88 | 8.19  | 7.28 | 8.74 | 8.68 | 7.14 |
| 39 | 5.93 | 7.36 | 6.68 | 6.88 | 8.19  | 7.28 | 8.74 | 8.68 | 7.14 |
| 40 | 2.15 | 7.9  | 7.23 | 6.59 | 8.71  | 7.67 | 8.66 | 8.65 | 7.97 |
| 41 | 5.85 | 8.49 | 7.2  | 6.75 | 8.64  | 7.85 | 8.76 | 9.07 | 7.43 |
| 42 | 5.49 | 8.4  | 8.59 | 6.65 | 8.36  | 7.67 | 9.59 | 9.17 | 9.28 |
| 43 | 5.98 | 6.17 | 5.08 | 7.58 | 8.05  | 8.04 | 7.59 | 7.09 | 5.14 |
| 44 | 7.47 | 7.58 | 7    | 6.9  | 8.39  | 7.73 | 8.5  | 8.85 | 7.35 |
| 45 | 6.32 | 7.62 | 6.73 | 6.76 | 8.78  | 7.22 | 7.91 | 8.73 | 7.13 |
| 46 | 4.86 | 7.75 | 6.31 | 7.17 | 8.55  | 8.11 | 8.8  | 8.87 | 7    |
| 47 | 6.36 | 9.13 | 8.24 | 1.73 | 9.45  | 6.51 | 9.46 | 9.26 | 9.77 |
| 48 | 5.93 | 8.87 | 7.11 | 1.66 | 9.86  | 4.47 | 7.88 | 8.58 | 8.23 |
| 49 | 3.84 | 8.8  | 8.2  | 2.1  | 9.41  | 5.87 | 9.46 | 8.69 | 9.41 |
| 50 | 5.4  | 6.74 | 5.2  | 7.04 | 8     | 7.65 | 7.9  | 7.35 | 6.06 |
| 51 | 5.3  | 8.46 | 7.23 | 7.15 | 7.94  | 8.21 | 9.37 | 9.23 | 8.49 |
| 52 | 3.46 | 8.6  | 7.1  | 7.35 | 8.06  | 8.52 | 9.55 | 9.54 | 8.01 |
| 53 | 1.98 | 6.95 | 6.3  | 6.77 | 8.11  | 7.75 | 8.02 | 8.35 | 7.94 |

|    |      |      |      |      |      |      |       |       |       |
|----|------|------|------|------|------|------|-------|-------|-------|
| 1  |      |      |      |      |      |      |       |       |       |
| 2  | 4.59 | 7.46 | 6.87 | 6.49 | 8.27 | 7.56 | 8.03  | 9.11  | 7.96  |
| 3  | 3.95 | 6.52 | 7.71 | 7.59 | 8.39 | 8.04 | 9.46  | 8.11  | 8.12  |
| 4  | 6.26 | 7.78 | 5.22 | 3.77 | 7.33 | 6.78 | 7.86  | 8.62  | 6.67  |
| 5  | 5.69 | 8.64 | 7.48 | 2.4  | 9.98 | 5.47 | 9.07  | 9.46  | 8.98  |
| 6  | 4.88 | 9    | 7.94 | 3.49 | 7.09 | 5.35 | 10.41 | 10.28 | 10.45 |
| 7  | 6.36 | 8.16 | 7.41 | 0.41 | 7.09 | 5.93 | 9.14  | 8.77  | 8.5   |
| 8  | 7.2  | 8.5  | 7.43 | 0.55 | 8.71 | 6.82 | 8.36  | 8.98  | 8.58  |
| 9  | 6.39 | 8.49 | 7.65 | 1.34 | 8.38 | 6.69 | 8.68  | 8.95  | 8.85  |
| 10 | 5.08 | 8.14 | 8.6  | 4.08 | 8.25 | 7.58 | 11.49 | 9.02  | 9.22  |
| 11 | 6.04 | 8.03 | 7.04 | 2.38 | 8.22 | 4.7  | 8.9   | 9.05  | 8.8   |
| 12 | 5.53 | 8.26 | 6.95 | 2.08 | 8.9  | 5.35 | 7.86  | 8.7   | 8.8   |
| 13 | 3.98 | 7.23 | 5.96 | 6.14 | 8.55 | 6.62 | 7.3   | 7.89  | 7.56  |
| 14 | 3.85 | 8.43 | 9.64 | 2.26 | 8.56 | 5.72 | 11.99 | 8.72  | 10.93 |
| 15 | 0.2  | 0.79 | 6    | 8.48 | 9.71 | 8.25 | 8.76  | 0.79  | 0     |
| 16 | 6.74 | 7.83 | 7.56 | 6.93 | 9.2  | 4.9  | 8.34  | 8.76  | 8.69  |
| 17 | 6.33 | 7.59 | 6.78 | 6.69 | 9.42 | 4.79 | 7.64  | 8.92  | 7.92  |
| 18 | 5.04 | 7.9  | 6.49 | 6.97 | 9.26 | 5.69 | 8.32  | 8.86  | 7.91  |
| 19 | 4.43 | 8.76 | 7.44 | 0.43 | 8.33 | 5.19 | 7.78  | 9.47  | 9.2   |
| 20 | 3.77 | 8.18 | 7.26 | 5.72 | 7.93 | 7.06 | 8.73  | 8.93  | 9.29  |
| 21 | 5.59 | 8.62 | 7.54 | 4.2  | 8.13 | 6.74 | 8.71  | 9.4   | 8.9   |
| 22 | 5.16 | 6.75 | 7.49 | 6.75 | 6.75 | 7.16 | 11.31 | 5.16  | 7.49  |
| 23 | 6.39 | 7.62 | 5.04 | 2.46 | 7.71 | 5.56 | 5.2   | 8.75  | 6.21  |
| 24 | 4.44 | 7.8  | 4.71 | 2.54 | 7.61 | 5.82 | 7.19  | 8.64  | 7.3   |
| 25 | 1.18 | 8.43 | 6.7  | 1.18 | 8.41 | 6.91 | 9.18  | 9.12  | 8.68  |
| 26 | 2.91 | 8.45 | 6.99 | 1.91 | 8.45 | 6.84 | 9.94  | 9.11  | 8.79  |
| 27 | 6.07 | 8.63 | 8.32 | 1.54 | 7.87 | 6.42 | 10.23 | 9.68  | 9.61  |
| 28 | 2    | 2.58 | 5.95 | 7.79 | 8.82 | 8.33 | 8.16  | 4.8   | 6     |
| 29 | 2.44 | 0.86 | 5.5  | 7.82 | 8.92 | 8.4  | 8.18  | 2.86  | 0.86  |
| 30 | 3.35 | 1.77 | 5.47 | 8.03 | 8.93 | 8.44 | 7.85  | 2.77  | 1.77  |
| 31 | 6.64 | 7.65 | 6.48 | 0.01 | 7.16 | 4.92 | 8.95  | 8.89  | 7.71  |
| 32 | 6.03 | 8.58 | 7.88 | 1.59 | 5.91 | 7.35 | 9.28  | 9.29  | 9.54  |
| 33 | 5.32 | 8.19 | 6.5  | 1.69 | 6.85 | 6.34 | 8.4   | 8.51  | 8     |
| 34 | 8.52 | 8.57 | 7.83 | 0.16 | 6.11 | 6.51 | 9.4   | 8.96  | 8.29  |
| 35 | 2.04 | 2.45 | 4.54 | 7.36 | 7.48 | 7.37 | 7.81  | 2.45  | 3.26  |
| 36 | 0.25 | 3.71 | 3.42 | 6.95 | 7.48 | 7.38 | 7.24  | 2.84  | 4.42  |
| 37 | 0.34 | 4.74 | 4.51 | 6.75 | 7.3  | 7.14 | 7.32  | 4.15  | 5.61  |
| 38 | 0    | 0.32 | 5.32 | 7.44 | 7.72 | 8.1  | 8.12  | 0.32  | 0     |
| 39 | 1.34 | 1.34 | 4.14 | 7.01 | 7.87 | 7.92 | 7.06  | 1.34  | 3.66  |
| 40 | 2.1  | 1.1  | 5.18 | 7.51 | 7.59 | 7.44 | 7.57  | 1.1   | 4.27  |
| 41 | 0.31 | 2.31 | 5.17 | 7.51 | 7.48 | 7.64 | 8.09  | 3.31  | 5.7   |
| 42 | 2.41 | 2.41 | 6.87 | 5.87 | 6.11 | 6.66 | 7.62  | 2.41  | 2.41  |
| 43 | 1.06 | 3.64 | 5.23 | 8.12 | 8.51 | 8.56 | 8.08  | 3.64  | 4.38  |
| 44 | 1.33 | 0.33 | 5.26 | 8.41 | 9.03 | 8.79 | 8.29  | 0.91  | 1.65  |
| 45 | 0.87 | 6.22 | 5.39 | 7.17 | 8.3  | 7.82 | 7.41  | 6.62  | 5.19  |
| 46 | 1.33 | 3.21 | 5.45 | 8.03 | 8.5  | 8.42 | 8.08  | 3.66  | 3.21  |
| 47 | 3.94 | 5.96 | 5.55 | 7.5  | 8.04 | 7.62 | 8.34  | 6.41  | 5.43  |
| 48 | 2.62 | 3.3  | 6.02 | 8.04 | 8.88 | 8.03 | 8.37  | 2.62  | 4.2   |
| 49 | 0.71 | 2.29 | 5.75 | 8.3  | 9.07 | 7.96 | 8.06  | 2.71  | 0.71  |
| 50 | 3.9  | 1.9  | 6.73 | 8.2  | 8.53 | 8.26 | 8.63  | 2.22  | 4.71  |
| 51 | 3.5  | 7.43 | 5.82 | 6.29 | 8.02 | 6.43 | 7.48  | 7.81  | 7.5   |
| 52 | 4.7  | 7.59 | 6.81 | 6.65 | 8.27 | 6.44 | 7.23  | 8.03  | 8.11  |
| 53 | 4.94 | 7.84 | 6.27 | 6.48 | 8.21 | 6.69 | 7.45  | 8.19  | 7.41  |

<https://mc.manuscriptcentral.com/gut>

|    |      |      |      |      |      |      |       |       |       |
|----|------|------|------|------|------|------|-------|-------|-------|
| 1  |      |      |      |      |      |      |       |       |       |
| 2  | 5.08 | 7.38 | 6.08 | 7.02 | 8.17 | 6.63 | 7.57  | 7.64  | 7.35  |
| 3  | 8.23 | 7.96 | 7.9  | 6.19 | 9.11 | 6.56 | 8.62  | 9     | 9.82  |
| 4  | 7.75 | 7.79 | 7.41 | 6.35 | 9.03 | 7.33 | 9.05  | 8.81  | 9.17  |
| 5  | 6.79 | 7.61 | 7.03 | 6.57 | 9.41 | 6.55 | 7.87  | 8.18  | 8.6   |
| 6  | 6.05 | 7.43 | 7.36 | 6.46 | 9.36 | 6.46 | 7.91  | 8.22  | 8.67  |
| 7  | 7.07 | 8.2  | 7.4  | 6.98 | 8.73 | 8.01 | 9.37  | 9.1   | 7.81  |
| 8  | 5.3  | 8.56 | 6.49 | 3.43 | 8.94 | 7.58 | 9.21  | 8.84  | 8.43  |
| 9  | 5.23 | 8.63 | 5.76 | 2.3  | 8.69 | 7.41 | 8.13  | 8.83  | 7.71  |
| 10 | 5.39 | 9.59 | 6.93 | 0.74 | 7.81 | 8.41 | 9.99  | 9.94  | 8.64  |
| 11 | 6.16 | 9.25 | 7.99 | 5.01 | 8.57 | 6.83 | 9.24  | 10.14 | 9.22  |
| 12 | 4.63 | 9.1  | 7.52 | 3.75 | 9.18 | 7.24 | 9.58  | 9.92  | 9.58  |
| 13 | 7.41 | 9.32 | 8.35 | 4.29 | 9.1  | 7.48 | 9.72  | 10.01 | 10.22 |
| 14 | 4.82 | 9.2  | 7.23 | 3.97 | 9.23 | 7.52 | 9.27  | 9.75  | 8.8   |
| 15 | 3.87 | 7.6  | 4.94 | 5.97 | 8.62 | 6.71 | 7.79  | 9.02  | 7.62  |
| 16 | 4.32 | 8.23 | 4.9  | 2.09 | 8.86 | 5.42 | 7.17  | 9.07  | 7.54  |
| 17 | 5.35 | 8.8  | 6.65 | 6.23 | 8.45 | 7.67 | 9.31  | 9.4   | 8.49  |
| 18 | 5.58 | 7.66 | 5.88 | 1    | 6.76 | 5.52 | 8.78  | 8.94  | 7.42  |
| 19 | 4.37 | 8.08 | 6.62 | 1.67 | 8.49 | 7.22 | 9.34  | 9.06  | 9.24  |
| 20 | 4.33 | 9    | 7.54 | 2.52 | 7.43 | 8.11 | 10.24 | 10.63 | 9.39  |
| 21 | 6.62 | 7.89 | 6.44 | 0.93 | 8.77 | 5.1  | 8.54  | 8.53  | 7.96  |
| 22 | 8.64 | 8.8  | 8.04 | 2.54 | 8.34 | 4.5  | 8.73  | 9.69  | 9.34  |
| 23 | 6.25 | 8.81 | 6.84 | 1.48 | 8.39 | 4.84 | 7.04  | 9.85  | 8.01  |
| 24 | 5.91 | 7.48 | 7.06 | 5.86 | 8.38 | 6.83 | 8.61  | 9.15  | 7.61  |
| 25 | 5.45 | 7.25 | 7.66 | 5.93 | 8.16 | 6.48 | 8.88  | 9.23  | 8.11  |
| 26 | 8.36 | 8.36 | 9.85 | 5.96 | 8.19 | 7.32 | 11.48 | 9.63  | 8.88  |
| 27 | 6.38 | 7.52 | 4.75 | 0.36 | 6.93 | 4.75 | 5.92  | 8     | 6.09  |
| 28 | 6.43 | 7.8  | 4.96 | 3.96 | 7.11 | 6.38 | 6.28  | 8.55  | 6.6   |
| 29 | 5.38 | 7.52 | 5.44 | 2.76 | 7.55 | 4.81 | 6.74  | 8.62  | 7.54  |
| 30 | 7.45 | 7.19 | 5.07 | 1.9  | 7.39 | 5.9  | 7.03  | 9.93  | 7.71  |
| 31 | 1.76 | 1.76 | 4.34 | 7.4  | 7.91 | 7.64 | 7.25  | 3.34  | 3.34  |
| 32 | 0.72 | 3.53 | 4.89 | 7.11 | 7.65 | 7.71 | 7.71  | 4.53  | 6.18  |
| 33 | 0.88 | 0.88 | 4.05 | 7.31 | 7.84 | 8.07 | 6.91  | 1.88  | 0.88  |
| 34 | 0.96 | 2.54 | 5.04 | 7.31 | 7.7  | 8.19 | 7.67  | 0.96  | 2.54  |
| 35 | 4.17 | 6.21 | 4.49 | 5.45 | 6.87 | 6.02 | 6.38  | 7.24  | 6.34  |
| 36 | 4.18 | 6.43 | 4.95 | 6.23 | 7.74 | 6.8  | 6.75  | 6.96  | 5.36  |
| 37 | 5.38 | 6.61 | 5.88 | 6.16 | 7.48 | 6.9  | 7.21  | 7.55  | 6.95  |
| 38 | 6.17 | 7.05 | 6.87 | 5.74 | 7.34 | 6.62 | 7.6   | 8.09  | 7.1   |
| 39 | 7.73 | 7.59 | 1.35 | 0.35 | 5.31 | 1.35 | 5.21  | 7.75  | 4.35  |
| 40 | 5.71 | 7.97 | 6.46 | 4.46 | 8.49 | 6.82 | 8.02  | 9.13  | 7.99  |
| 41 | 4.23 | 8.51 | 5    | 0.42 | 8.58 | 5.91 | 6.99  | 8.84  | 7.74  |
| 42 | 5.04 | 8.07 | 6.88 | 2.23 | 8.92 | 6.82 | 10.12 | 8.44  | 8.54  |
| 43 | 5.52 | 7.51 | 6.05 | 5.16 | 8.49 | 6.7  | 8.26  | 8.17  | 7.55  |
| 44 | 4.51 | 8.21 | 7.68 | 4.51 | 7.51 | 6.51 | 10.34 | 8.1   | 9.21  |
| 45 | 3.19 | 8.81 | 6.28 | 0.87 | 8.34 | 5.82 | 9.04  | 9.18  | 9.07  |
| 46 | 3.26 | 8.95 | 8.15 | 1.52 | 8.23 | 5.89 | 9.94  | 9.66  | 10.36 |
| 47 | 1.68 | 7.3  | 0.68 | 1.68 | 9.43 | 0.68 | 2.68  | 7.14  | 0.68  |
| 48 | 6.7  | 8.31 | 5.82 | 5.19 | 8.6  | 6.43 | 8.15  | 8.83  | 7.12  |
| 49 | 5.08 | 8.36 | 5.56 | 1.86 | 8.57 | 6.18 | 7.52  | 8.63  | 7.06  |
| 50 | 5.26 | 8.24 | 4.84 | 5.72 | 8.42 | 6.75 | 7.29  | 8.83  | 6.26  |
| 51 | 7.28 | 7.95 | 6.72 | 0.57 | 7.1  | 3.89 | 8.37  | 8.56  | 7.96  |
| 52 | 3.85 | 7.83 | 6.14 | 5.43 | 6.94 | 6.26 | 7.63  | 8.58  | 8.28  |
| 53 | 3.54 | 7.16 | 5.96 | 5.29 | 7.05 | 6.14 | 7.55  | 8.23  | 7.93  |

|      |      |      |      |      |      |       |      |      |
|------|------|------|------|------|------|-------|------|------|
| 6.31 | 8.9  | 6.62 | 0.79 | 6.34 | 6.11 | 8.19  | 9.35 | 7.68 |
| 6.01 | 7.33 | 7.23 | 3.42 | 7.01 | 6.01 | 8.56  | 8.97 | 9.19 |
| 7.74 | 7.19 | 6.63 | 4.91 | 7.93 | 5.98 | 6.93  | 7.87 | 7.33 |
| 2.07 | 7.35 | 5.66 | 4.07 | 7.99 | 5.98 | 7.23  | 8.36 | 7.99 |
| 4.14 | 3.88 | 6.51 | 7.51 | 8.24 | 7.34 | 9.12  | 4.72 | 6.88 |
| 7.81 | 7.67 | 7.29 | 0.57 | 7.61 | 4.52 | 7.71  | 8.05 | 6.93 |
| 4.53 | 7.39 | 4.95 | 1.07 | 7.51 | 6.15 | 6.04  | 8.22 | 5.37 |
| 3.88 | 7.62 | 4.78 | 1.35 | 7.41 | 6.07 | 5.71  | 8.09 | 5.46 |
| 0.27 | 0.27 | 5.18 | 7.5  | 8.2  | 8.05 | 7.6   | 0.27 | 1.27 |
| 3.21 | 6.74 | 5.49 | 6.81 | 7.79 | 7.51 | 7.9   | 7.59 | 6.41 |
| 3.11 | 7.37 | 6.1  | 0.65 | 7.44 | 6.57 | 9.2   | 8.91 | 6.97 |
| 3.21 | 7.97 | 6.64 | 5.28 | 8.21 | 7.26 | 8.49  | 9.13 | 7.1  |
| 3.47 | 8.22 | 6.23 | 3.47 | 7.69 | 6.9  | 8.44  | 9.35 | 7.12 |
| 3.71 | 7.81 | 7.06 | 4.3  | 7.53 | 7.01 | 9.63  | 9.34 | 8.11 |
| 5.13 | 6.35 | 8.38 | 2.54 | 8.54 | 2.54 | 10.82 | 7.3  | 8.79 |
| 2.97 | 7.53 | 5.63 | 3.5  | 6.86 | 5.23 | 7.07  | 7.14 | 6.86 |
| 3.4  | 7    | 4.59 | 5.66 | 7.16 | 6.48 | 6.34  | 7.29 | 5.76 |
| 3.07 | 7.43 | 5.73 | 3.45 | 7.09 | 5.34 | 7.37  | 7.15 | 7.04 |

|    | ITGA2 | ITGA3 | ITGA5 | ITGA6 | ITGA7 | ITGA8 | ITGA9 | ITGAM | ITGB1 |
|----|-------|-------|-------|-------|-------|-------|-------|-------|-------|
| 1  |       |       |       |       |       |       |       |       |       |
| 2  |       |       |       |       |       |       |       |       |       |
| 3  | 5.34  | 7.67  | 7.02  | 7.75  | 7.11  | 5.95  | 6.74  | 6.97  | 9.71  |
| 4  | 7.02  | 8.78  | 7.98  | 10.19 | 7.46  | 5.99  | 6.46  | 6.75  | 10.75 |
| 5  | 7.01  | 8.73  | 7.66  | 9.83  | 7.17  | 6.13  | 6.76  | 6.61  | 10.41 |
| 6  | 7.13  | 8.8   | 8.82  | 10.33 | 8.67  | 7.45  | 7.16  | 6.11  | 11.55 |
| 7  | 3.82  | 7.71  | 1.01  | 7.7   | 7.85  | 7.89  | 7.65  | 8.08  | 9.03  |
| 8  | 7.9   | 9.23  | 7.94  | 8.56  | 6.52  | 6.7   | 6.46  | 7.2   | 10.69 |
| 9  | 7.92  | 9.63  | 8.47  | 8.73  | 6.63  | 6.52  | 6.44  | 7.43  | 10.83 |
| 10 | 8.64  | 10.3  | 8.82  | 9.7   | 6.95  | 5.85  | 6.48  | 7.31  | 11.86 |
| 11 | 6.78  | 9.01  | 8.32  | 9.86  | 6.52  | 4.37  | 5.92  | 6.97  | 11.2  |
| 12 | 7.93  | 8.79  | 7.49  | 9.49  | 6.04  | 5.43  | 5.91  | 6.62  | 10.52 |
| 13 | 8.04  | 9.11  | 8.25  | 10.08 | 6.68  | 5.9   | 5.51  | 6.05  | 10.97 |
| 14 | 8.6   | 9.1   | 9.15  | 9.83  | 7.9   | 5.54  | 6.56  | 6.77  | 11.38 |
| 15 | 7.91  | 7.89  | 6.98  | 10.67 | 6.67  | 6.36  | 6.66  | 6.58  | 10.89 |
| 16 | 7.65  | 7.63  | 8.17  | 10.07 | 7     | 6.39  | 6.71  | 6.88  | 11.15 |
| 17 | 7.32  | 8.38  | 8.11  | 11.37 | 8.84  | 5.35  | 6.29  | 6.02  | 12    |
| 18 | 7.56  | 8.43  | 8.87  | 8.94  | 7.62  | 6.23  | 7.11  | 7.19  | 10.73 |
| 19 | 7.9   | 8.79  | 7.89  | 9.18  | 7.65  | 7.36  | 6.78  | 7.46  | 10.52 |
| 20 | 7.01  | 9.01  | 8.78  | 9.56  | 8.02  | 6.87  | 6.78  | 7.03  | 10.98 |
| 21 | 5.78  | 8.8   | 8.19  | 9.72  | 7.84  | 5.07  | 6.15  | 7     | 11.1  |
| 22 | 7.65  | 8.95  | 8.75  | 10.29 | 7.26  | 7.02  | 6.29  | 6.45  | 11.25 |
| 23 | 7.57  | 8.68  | 9.33  | 9.76  | 8.6   | 6.58  | 6.9   | 7.17  | 11.25 |
| 24 | 8.92  | 10.41 | 9.57  | 9.58  | 8.36  | 5.73  | 7.01  | 5.85  | 11.97 |
| 25 | 8.72  | 10.63 | 9.42  | 9.85  | 8.11  | 7.53  | 7.55  | 6.45  | 11.81 |
| 26 | 9.1   | 10.53 | 10.46 | 9.54  | 8.89  | 6.04  | 7.16  | 5.85  | 12.15 |
| 27 | 4.82  | 8.35  | 9.12  | 8.53  | 7.61  | 3.75  | 7.26  | 6.04  | 10.51 |
| 28 | 8.3   | 9.08  | 8.07  | 10.94 | 6.22  | 5.71  | 5.42  | 5.26  | 11.49 |
| 29 | 7.95  | 9.26  | 7.94  | 10.93 | 6.3   | 5.56  | 5.28  | 5.81  | 11.39 |
| 30 | 6.88  | 8.76  | 7.91  | 10.5  | 6.52  | 6.04  | 6.31  | 6.39  | 10.93 |
| 31 | 5.58  | 8.24  | 6.24  | 9.58  | 7.57  | 5.4   | 6.83  | 6.4   | 10.08 |
| 32 | 6.62  | 8.73  | 7.33  | 9.5   | 7.47  | 5.7   | 6.47  | 6.91  | 10.32 |
| 33 | 6.3   | 8.54  | 7.1   | 9.51  | 7.4   | 6     | 6.42  | 6.66  | 10.32 |
| 34 | 6.1   | 8.27  | 6.59  | 9.33  | 7.97  | 6.29  | 6.9   | 7.42  | 10.38 |
| 35 | 3.93  | 6.62  | 7     | 7.74  | 7.46  | 6.4   | 6.75  | 7.21  | 9.41  |
| 36 | 8.71  | 9.15  | 9.27  | 9.43  | 7.79  | 4.7   | 6.63  | 6.95  | 11.86 |
| 37 | 9.04  | 9.52  | 9.32  | 9.81  | 6.75  | 6.3   | 5.9   | 6.3   | 11.54 |
| 38 | 8.06  | 9.38  | 8.65  | 9.54  | 7.96  | 5.28  | 6.49  | 6.95  | 11.5  |
| 39 | 6.97  | 8.82  | 7.09  | 10.62 | 6.03  | 3.45  | 5.45  | 6.79  | 10.28 |
| 40 | 7.46  | 9.17  | 8.33  | 10.9  | 5.45  | 4.49  | 4.69  | 6.47  | 10.29 |
| 41 | 6.39  | 9.03  | 7.83  | 10.62 | 6.07  | 4.61  | 5.17  | 5.92  | 10.34 |
| 42 | 6.22  | 8.66  | 8.03  | 9.91  | 5.81  | 4.65  | 4.74  | 6.67  | 10.21 |
| 43 | 5.87  | 7.39  | 7.48  | 7.77  | 6.87  | 6.16  | 5.83  | 6.64  | 9.82  |
| 44 | 5.42  | 7.5   | 7.3   | 7.97  | 6.36  | 6.6   | 6.07  | 6.65  | 9.89  |
| 45 | 5.31  | 7.76  | 6.77  | 7.71  | 6.88  | 6.93  | 6.08  | 6.45  | 9.59  |
| 46 | 5.43  | 7.87  | 7.12  | 8.15  | 6.31  | 6.02  | 5.57  | 6.57  | 10.06 |
| 47 | 5.67  | 8.11  | 7.38  | 9.93  | 8.5   | 4.86  | 6.86  | 4.86  | 10.66 |
| 48 | 6.65  | 8.2   | 7.82  | 9.2   | 7.02  | 6.6   | 6.46  | 5.81  | 10.36 |
| 49 | 7.04  | 8.39  | 8.34  | 9.42  | 7.41  | 5.13  | 5.55  | 5.95  | 10.63 |
| 50 | 6.58  | 7.83  | 9.3   | 9.07  | 8.01  | 4.9   | 5.79  | 5.85  | 10.99 |
| 51 | 7.84  | 9.59  | 8.25  | 10.89 | 7.94  | 5.99  | 6.39  | 7.47  | 11.76 |
| 52 | 8.28  | 9.58  | 9.16  | 10.41 | 6.53  | 4.1   | 5.65  | 7.44  | 12.27 |
| 53 | 8.22  | 9.15  | 8.17  | 10.21 | 6.17  | 4.4   | 5.3   | 7.38  | 12.09 |

<https://mc.manuscriptcentral.com/gut>

1  
2  
3  
4  
5  
6  
7  
8  
9  
10  
11  
12  
13  
14  
15  
16  
17  
18  
19  
20  
21  
22  
23  
24  
25  
26  
27  
28  
29  
30  
31  
32  
33  
34  
35  
36  
37  
38  
39  
40  
41  
42  
43  
44  
45  
46  
47  
48  
49  
50  
51  
52  
53  
54  
55  
56  
57  
58  
59  
60

|      |       |       |       |      |      |      |      |       |
|------|-------|-------|-------|------|------|------|------|-------|
| 8.19 | 9.43  | 9.24  | 10.27 | 7.32 | 4.78 | 5.72 | 7.59 | 12.14 |
| 7.19 | 9.65  | 6.91  | 10.95 | 7.16 | 4.84 | 7    | 6.35 | 10.52 |
| 7.62 | 9.3   | 7.85  | 10.86 | 7.07 | 5.92 | 7.03 | 6.7  | 10.8  |
| 7.68 | 9.39  | 7.6   | 10.94 | 6.88 | 5.91 | 6.92 | 6.49 | 11.14 |
| 7.05 | 9.24  | 7.7   | 10.79 | 7.22 | 5.64 | 7.21 | 6.81 | 10.75 |
| 7.92 | 8.93  | 7.82  | 10.83 | 7.36 | 4.14 | 6.16 | 6.52 | 11.02 |
| 8.66 | 9.71  | 8.44  | 11.25 | 8.04 | 5.92 | 5.67 | 5.61 | 11.77 |
| 7.65 | 9.16  | 7.47  | 11.2  | 7.33 | 4.09 | 4.46 | 4.53 | 10.99 |
| 7.97 | 9.45  | 8.04  | 10.91 | 8.73 | 7.71 | 6.39 | 5.65 | 11.38 |
| 7.94 | 8.56  | 7.97  | 9     | 6.59 | 5.31 | 4.39 | 5.96 | 10.13 |
| 7.53 | 8.81  | 8.16  | 9.74  | 7.44 | 6.27 | 5.24 | 5.3  | 10.67 |
| 7.75 | 8.68  | 8.16  | 9.25  | 7.12 | 5.21 | 4.34 | 5.4  | 10.73 |
| 7.24 | 8.66  | 8.28  | 9.13  | 7.91 | 5.96 | 5.5  | 5.34 | 10.76 |
| 6.74 | 6.74  | 5.15  | 7.15  | 8.32 | 5.15 | 5.15 | 5.15 | 10.74 |
| 8.39 | 8.58  | 6.92  | 11.06 | 7.75 | 6.28 | 6.07 | 6.54 | 11.53 |
| 8    | 8.08  | 7.06  | 10.11 | 7.2  | 6.84 | 6.58 | 7.23 | 11.11 |
| 4.49 | 8.04  | 0.24  | 9.26  | 9.17 | 8.36 | 7.86 | 7.42 | 10.31 |
| 4.94 | 7.8   | 0.77  | 8.82  | 8.78 | 7.5  | 7.54 | 7.45 | 9.01  |
| 9.3  | 9.41  | 6.75  | 11.03 | 6.12 | 5.31 | 6.07 | 6.62 | 10.93 |
| 9.63 | 9.61  | 6.68  | 11.12 | 5.99 | 5.93 | 5.89 | 6.6  | 11.05 |
| 9.02 | 9.35  | 6.34  | 10.75 | 6.55 | 5.98 | 6.58 | 6.82 | 10.77 |
| 8.19 | 9.09  | 8.42  | 9.99  | 8.13 | 7.39 | 6.62 | 5.74 | 11.76 |
| 8.4  | 8.96  | 7.78  | 9.89  | 8.41 | 8.36 | 6.79 | 6.26 | 11.9  |
| 6.33 | 8.4   | 7.35  | 9.38  | 8.33 | 8.46 | 7.22 | 6.93 | 11.54 |
| 7.92 | 9.02  | 9.61  | 10.64 | 6.28 | 6.34 | 6.16 | 6.87 | 11.53 |
| 8.29 | 8.85  | 9.93  | 10.48 | 6.7  | 5.5  | 6.09 | 6.85 | 11.96 |
| 7.82 | 8.75  | 10.09 | 10.32 | 7.35 | 5.55 | 6.36 | 7.08 | 12.11 |
| 6.7  | 8.23  | 8.41  | 8.98  | 6.73 | 6.36 | 6.47 | 6.57 | 10.85 |
| 6.56 | 8.22  | 8.8   | 8.5   | 6.97 | 6.62 | 6.34 | 6.58 | 11    |
| 5.96 | 8.07  | 8.38  | 8.5   | 7.42 | 6.97 | 6.68 | 6.88 | 10.84 |
| 8.34 | 8.51  | 7.55  | 10.94 | 8.53 | 7.59 | 7.68 | 7.06 | 10.86 |
| 8.5  | 8.96  | 7.32  | 10.69 | 7.61 | 6.84 | 6.9  | 6.86 | 10.84 |
| 8.45 | 9.04  | 6.69  | 10.68 | 7.49 | 6.9  | 7.24 | 6.9  | 10.75 |
| 8.41 | 10.33 | 9.04  | 9.76  | 6.99 | 6.31 | 6.67 | 7.41 | 11.66 |
| 8.66 | 10.12 | 8.97  | 10.07 | 6.59 | 6.71 | 6.76 | 7.53 | 11.43 |
| 8.41 | 10.49 | 9.62  | 9.89  | 7.22 | 6.38 | 6.88 | 7.61 | 11.96 |
| 7.18 | 9.33  | 8.05  | 9.21  | 7.59 | 6.65 | 6.48 | 7.65 | 10.64 |
| 7.18 | 9.33  | 8.05  | 9.21  | 7.59 | 6.65 | 6.48 | 7.65 | 10.64 |
| 7.23 | 10.11 | 7.3   | 10.41 | 7.89 | 6.92 | 7.14 | 6.99 | 10.76 |
| 7.53 | 9.87  | 8.92  | 10.08 | 8.31 | 7.44 | 7.48 | 7.43 | 11.19 |
| 7.61 | 10.11 | 8.03  | 9.94  | 7.62 | 6.61 | 6.84 | 7.12 | 11.29 |
| 5.6  | 7.79  | 6.73  | 7.96  | 7.31 | 7.41 | 7.57 | 7.6  | 9.42  |
| 7.07 | 9.09  | 8.52  | 9.14  | 7.41 | 6.9  | 6.84 | 6.66 | 10.71 |
| 7.52 | 9.67  | 8.5   | 9.82  | 6.97 | 6.76 | 7.1  | 6.16 | 10.56 |
| 5.7  | 8.84  | 8.55  | 9.11  | 8.24 | 7.09 | 7.55 | 7.13 | 10.5  |
| 8.46 | 9.53  | 8.15  | 10.43 | 6.63 | 3.19 | 5.4  | 6.46 | 11.46 |
| 8.45 | 9.97  | 7.76  | 10.96 | 6.95 | 2.4  | 5.4  | 5.47 | 11.63 |
| 8.21 | 9.29  | 8.47  | 10.38 | 7.16 | 3.32 | 5.6  | 7.01 | 11.45 |
| 5.86 | 8.24  | 6.81  | 8.32  | 7.21 | 6.96 | 7.12 | 7.4  | 9.68  |
| 6.3  | 8.15  | 9     | 8.72  | 8.13 | 7.33 | 7.32 | 7.33 | 11    |
| 5.98 | 8.07  | 8.69  | 8.73  | 8.3  | 7.28 | 7.33 | 7.33 | 11.01 |
| 6.33 | 8.31  | 7.06  | 8.53  | 6.94 | 7.42 | 7.12 | 6.77 | 10.4  |

<https://mc.manuscriptcentral.com/gut>



|    |      |       |      |       |      |      |      |      |       |
|----|------|-------|------|-------|------|------|------|------|-------|
| 1  |      |       |      |       |      |      |      |      |       |
| 2  | 7    | 9.07  | 8.26 | 8.67  | 6.91 | 7.53 | 6.87 | 6.47 | 10.95 |
| 3  | 5.68 | 8.55  | 6.91 | 8.68  | 7.72 | 8.13 | 7    | 7.03 | 10.72 |
| 4  | 5.55 | 8.88  | 7.58 | 8.92  | 7.52 | 6.37 | 6.57 | 6.61 | 10.34 |
| 5  | 7.98 | 9.54  | 9.53 | 10.15 | 7.72 | 7.5  | 7.1  | 6.54 | 11.48 |
| 6  | 6.92 | 9.04  | 9.82 | 9.01  | 8.66 | 7.5  | 7.27 | 7.22 | 11.81 |
| 7  | 7.79 | 9.06  | 8.04 | 10.5  | 7.79 | 5.69 | 6.47 | 6.9  | 11.33 |
| 8  | 8.92 | 9.46  | 9.01 | 10.65 | 6.25 | 3.25 | 4.83 | 5.89 | 11.36 |
| 9  | 9    | 9.92  | 9.28 | 10.44 | 6.68 | 3.76 | 5.37 | 6.34 | 11.48 |
| 10 | 8.85 | 10.16 | 9.09 | 11.42 | 9.2  | 4.08 | 7.14 | 7.08 | 12.19 |
| 11 | 6.35 | 9.23  | 7.69 | 9.51  | 7.41 | 4.38 | 6.22 | 6.94 | 11.19 |
| 12 | 6.88 | 8.76  | 7.37 | 9.78  | 6.7  | 5.66 | 5.13 | 6.13 | 11    |
| 13 | 6.02 | 8.25  | 6.32 | 9.03  | 6.32 | 5.8  | 6.16 | 7.09 | 10.31 |
| 14 | 6.58 | 9.03  | 7.55 | 10.32 | 7.72 | 4.26 | 5.85 | 6.43 | 11.94 |
| 15 | 3.11 | 8.02  | 0.79 | 8.7   | 8.37 | 8.96 | 8.24 | 8.22 | 10.92 |
| 16 | 6.62 | 8.25  | 8.45 | 11.2  | 6.19 | 3.12 | 4.85 | 5.3  | 11.36 |
| 17 | 7.12 | 8.19  | 8.25 | 11.48 | 5.81 | 4    | 4.64 | 3.29 | 11.44 |
| 18 | 6.56 | 8.34  | 8.38 | 11.19 | 6.64 | 3.77 | 5.04 | 4.77 | 11.36 |
| 19 | 8.91 | 10.92 | 8.52 | 10.79 | 5.91 | 5.11 | 5.37 | 5.77 | 11.88 |
| 20 | 8.35 | 10.51 | 8.05 | 10.2  | 6.48 | 6.17 | 5.63 | 6.04 | 11.77 |
| 21 | 8.79 | 10.82 | 8.37 | 10.55 | 6.9  | 5.35 | 5.59 | 6.7  | 12.05 |
| 22 | 7.16 | 6.16  | 5.16 | 10.52 | 8.62 | 5.16 | 5.16 | 6.16 | 9.07  |
| 23 | 8.03 | 9.13  | 8.13 | 9.52  | 6.46 | 4.78 | 4.72 | 6.34 | 10.5  |
| 24 | 7.72 | 8.97  | 8.38 | 9.55  | 6.42 | 5.82 | 5.71 | 6.66 | 10.54 |
| 25 | 6.5  | 9.8   | 7.62 | 10.29 | 8.28 | 6.57 | 6.91 | 4.99 | 11.65 |
| 26 | 6.93 | 9.75  | 7.71 | 10.53 | 8.85 | 6.76 | 7.19 | 5.49 | 11.86 |
| 27 | 7.02 | 9.21  | 8.3  | 10.03 | 8.19 | 5.83 | 6.97 | 6.47 | 11.76 |
| 28 | 3    | 7.58  | 3.8  | 7.7   | 7.37 | 7    | 7.6  | 7.89 | 8.66  |
| 29 | 4.03 | 7.5   | 1.86 | 7.88  | 7.72 | 7.4  | 7.59 | 8.02 | 8.57  |
| 30 | 3.77 | 7.79  | 2.77 | 7.35  | 7.26 | 7.6  | 7.63 | 7.83 | 8.28  |
| 31 | 7.09 | 8.95  | 7.35 | 9.01  | 6.72 | 4.82 | 5.79 | 5.5  | 10.37 |
| 32 | 6.07 | 7.9   | 8.63 | 8.75  | 7.95 | 2.76 | 5.7  | 5.21 | 10.86 |
| 33 | 6.26 | 8.32  | 7.95 | 10.04 | 7.82 | 6.28 | 6.04 | 4.86 | 10.67 |
| 34 | 6.16 | 8.17  | 8.87 | 8.74  | 7.94 | 6.66 | 6.11 | 5.4  | 10.9  |
| 35 | 2.45 | 6.97  | 2.45 | 7.48  | 7.18 | 6.33 | 6.38 | 6.91 | 7.63  |
| 36 | 5.06 | 7.43  | 0.25 | 8.09  | 6.5  | 6.63 | 6.18 | 6.97 | 7.69  |
| 37 | 5.57 | 7.72  | 3.04 | 8.31  | 6.54 | 6.25 | 6.19 | 6.87 | 7.84  |
| 38 | 3.13 | 7.07  | 0.32 | 7.92  | 7.57 | 6.99 | 6.25 | 6.65 | 7.9   |
| 39 | 2.92 | 7.4   | 2.34 | 6.86  | 7.01 | 7.34 | 6.66 | 6.83 | 7.92  |
| 40 | 3.1  | 7.38  | 1.1  | 7.33  | 6.83 | 7.07 | 6.65 | 6.74 | 8.25  |
| 41 | 3.77 | 7.23  | 1.89 | 7.14  | 6.63 | 7.24 | 6.35 | 6.92 | 7.82  |
| 42 | 5.22 | 4     | 2.41 | 7     | 7.11 | 6.66 | 4.41 | 3.41 | 9.14  |
| 43 | 4.38 | 7.78  | 3.64 | 8.09  | 7.77 | 7.71 | 7.66 | 7.78 | 8.04  |
| 44 | 4.13 | 7.93  | 0.91 | 8.08  | 7.96 | 7.93 | 8.29 | 8.07 | 8.29  |
| 45 | 6.08 | 8.55  | 5.12 | 9.43  | 7.15 | 6.62 | 6.98 | 6.93 | 9.5   |
| 46 | 4    | 7.82  | 1.33 | 8     | 7.33 | 7.6  | 7.46 | 7.65 | 8.31  |
| 47 | 5.3  | 8.51  | 5.97 | 8.43  | 7.49 | 7.13 | 6.85 | 7.18 | 9.78  |
| 48 | 4.54 | 8.18  | 2.88 | 7.91  | 7.91 | 7.14 | 7.17 | 7.76 | 9.36  |
| 49 | 4.41 | 7.45  | 2.29 | 8.12  | 7.7  | 7.29 | 7.41 | 7.98 | 9.23  |
| 50 | 2.71 | 7.77  | 3.48 | 7.85  | 7.99 | 7.92 | 7.12 | 7.69 | 9.5   |
| 51 | 6.56 | 6.96  | 6.1  | 9.24  | 6.29 | 6.64 | 6.51 | 6.5  | 9.89  |
| 52 | 6.3  | 7.08  | 7.31 | 9.86  | 5.91 | 6.37 | 6.17 | 6.31 | 10.37 |
| 53 | 6.25 | 6.97  | 7.63 | 9.78  | 6.62 | 6.59 | 5.97 | 6.54 | 10.2  |

|    |      |       |      |       |      |      |      |      |       |
|----|------|-------|------|-------|------|------|------|------|-------|
| 1  |      |       |      |       |      |      |      |      |       |
| 2  | 5.88 | 7.16  | 6.42 | 9.46  | 6.96 | 6.44 | 6.1  | 6.66 | 9.89  |
| 3  | 6.76 | 8.4   | 8.16 | 9.03  | 7.04 | 6.22 | 6.56 | 6.99 | 11.37 |
| 4  | 6.99 | 8.74  | 9.15 | 9.41  | 7.55 | 6.56 | 6.72 | 7.24 | 11.51 |
| 5  | 6.3  | 8.82  | 8.01 | 8.42  | 6.85 | 6.13 | 6.33 | 6.83 | 11.15 |
| 6  | 5.97 | 8.73  | 7.87 | 8.74  | 6.88 | 6.04 | 6.25 | 6.97 | 11.22 |
| 7  | 7.18 | 9.58  | 8.26 | 9.54  | 7.66 | 6.6  | 6.76 | 7.09 | 11.22 |
| 8  | 8.54 | 9.68  | 8.53 | 10.96 | 8.19 | 6.7  | 6.93 | 6.72 | 11.47 |
| 9  | 8.74 | 9.29  | 8.48 | 10.85 | 7.45 | 7.19 | 6.41 | 6.44 | 11.38 |
| 10 | 6.52 | 8.95  | 9.68 | 10.24 | 9.98 | 6.89 | 8.05 | 7.08 | 11.8  |
| 11 | 9.17 | 11.07 | 8.78 | 9.81  | 6.87 | 4.76 | 6.26 | 7.16 | 12.09 |
| 12 | 8.15 | 9.56  | 8.63 | 9.86  | 7.57 | 7.24 | 6.7  | 7.51 | 11.69 |
| 13 | 8.56 | 9.76  | 8.72 | 9.81  | 7.5  | 6.47 | 6.79 | 7.7  | 11.88 |
| 14 | 8.38 | 9.91  | 8.28 | 10.25 | 7.88 | 6.93 | 6.68 | 7.01 | 11.83 |
| 15 | 7.31 | 9.43  | 6.94 | 8.82  | 7.16 | 6.06 | 6.61 | 6.84 | 10.68 |
| 16 | 8.15 | 9.92  | 8.09 | 9.41  | 7.15 | 6.37 | 6.35 | 6.15 | 11.25 |
| 17 | 6.39 | 9.22  | 7.94 | 9.08  | 9.05 | 8.08 | 7.87 | 6.97 | 11.4  |
| 18 | 6.96 | 8.12  | 7.98 | 9.31  | 7.67 | 5.58 | 6.7  | 7.32 | 10.74 |
| 19 | 7.83 | 8.74  | 8.56 | 10.98 | 7.09 | 6.45 | 6.13 | 6.19 | 11.4  |
| 20 | 7.7  | 8.81  | 9.74 | 9.86  | 8.88 | 4.22 | 6.89 | 7.23 | 11.83 |
| 21 | 6.92 | 8.44  | 7.28 | 9.93  | 7.21 | 5.1  | 5.95 | 5.91 | 10.73 |
| 22 | 8.27 | 8.61  | 9.08 | 11.04 | 6.16 | 4.45 | 5.75 | 5.3  | 11.62 |
| 23 | 9.16 | 9.12  | 7.9  | 11.37 | 5.75 | 4.52 | 6    | 3.87 | 11.36 |
| 24 | 7.86 | 7.71  | 8.55 | 9.75  | 7.15 | 6.57 | 7.19 | 6.69 | 10.97 |
| 25 | 7.74 | 7.42  | 8.56 | 10.23 | 7.18 | 6.6  | 6.84 | 6.63 | 11.28 |
| 26 | 7.15 | 8.61  | 8.58 | 10.01 | 10.6 | 7.54 | 8.24 | 6.32 | 12.77 |
| 27 | 5.36 | 5.85  | 7.16 | 7.3   | 6.32 | 4.06 | 5.36 | 5.82 | 9.46  |
| 28 | 5.65 | 6.79  | 7.95 | 8.39  | 6.94 | 7.13 | 5.84 | 5.25 | 9.93  |
| 29 | 6.26 | 6.07  | 7.69 | 7.46  | 6.46 | 4.16 | 5.6  | 5.55 | 9.99  |
| 30 | 6.71 | 6.65  | 9.87 | 8.01  | 8.11 | 5.36 | 5.22 | 4.22 | 9.61  |
| 31 | 3.76 | 6.85  | 1.76 | 6.85  | 6.46 | 6.89 | 6.15 | 6.97 | 7.59  |
| 32 | 5.36 | 7.29  | 4.63 | 7.51  | 6.67 | 6.36 | 6.76 | 6.85 | 8.16  |
| 33 | 4.88 | 6.82  | 0.88 | 6.56  | 7.11 | 7.13 | 6.86 | 7.19 | 7.79  |
| 34 | 4.76 | 7.02  | 2.54 | 6.48  | 6.98 | 6.68 | 7.22 | 6.71 | 7.68  |
| 35 | 5.9  | 7.69  | 5.57 | 8     | 6.1  | 5.03 | 6.24 | 6.23 | 8.72  |
| 36 | 5.66 | 7.48  | 6.57 | 7.97  | 6.56 | 6.28 | 6.39 | 6.25 | 8.94  |
| 37 | 6.14 | 7.55  | 7.13 | 7.95  | 6.57 | 6.18 | 6    | 6.48 | 9.36  |
| 38 | 6.51 | 7.65  | 7.17 | 7.8   | 7.1  | 6.11 | 6.07 | 6.85 | 9.78  |
| 39 | 3.94 | 5.68  | 7.48 | 7.83  | 7.26 | 4.81 | 5.85 | 7.01 | 9.68  |
| 40 | 7.69 | 9.24  | 7.51 | 9.61  | 7.59 | 5.05 | 6.32 | 5.27 | 10.97 |
| 41 | 7.96 | 9.28  | 7.8  | 10.52 | 5.94 | 5.51 | 6.49 | 6.09 | 10.98 |
| 42 | 7.76 | 8.93  | 6.4  | 11.26 | 6.82 | 4.23 | 6.23 | 5.55 | 11.17 |
| 43 | 7.12 | 8.77  | 7.04 | 9.03  | 6.47 | 5.15 | 6.04 | 6.18 | 10.32 |
| 44 | 7.32 | 8.68  | 6.51 | 10.89 | 7.97 | 6.1  | 6.83 | 6.1  | 10.99 |
| 45 | 8.33 | 8.69  | 8.48 | 10.3  | 7.24 | 7.03 | 6.48 | 5.39 | 11.42 |
| 46 | 8.41 | 8.59  | 8.92 | 9.74  | 7.53 | 5.02 | 6.52 | 5.98 | 11.9  |
| 47 | 6.56 | 8.93  | 8.92 | 8.1   | 7.44 | 2.27 | 6.95 | 4.68 | 10.08 |
| 48 | 7.3  | 8.71  | 9.17 | 8.44  | 8.29 | 4.89 | 7.19 | 6.93 | 10.71 |
| 49 | 7.55 | 8.74  | 8.98 | 8.81  | 7.74 | 4.98 | 7.46 | 6.03 | 10.57 |
| 50 | 7.22 | 8.24  | 9    | 8.3   | 7.55 | 4.96 | 7.46 | 6.98 | 10.34 |
| 51 | 6.14 | 6.06  | 7.54 | 8.37  | 6.35 | 4.16 | 6.22 | 5.7  | 10.65 |
| 52 | 5.92 | 6.99  | 7.53 | 7.71  | 6.83 | 5.7  | 6.7  | 6.11 | 10.18 |
| 53 | 6.43 | 6.56  | 7.33 | 7.84  | 6.58 | 5.79 | 6.33 | 5.86 | 9.93  |

<https://mc.manuscriptcentral.com/gut>

1  
2  
3  
4  
5  
6  
7  
8  
9  
10  
11  
12  
13  
14  
15  
16  
17  
18  
19  
20  
21  
22  
23  
24  
25  
26  
27  
28  
29  
30  
31  
32  
33  
34  
35  
36  
37  
38  
39  
40  
41  
42  
43  
44  
45  
46  
47  
48  
49  
50  
51  
52  
53  
54  
55  
56  
57  
58  
59  
60

|      |      |      |       |      |      |      |      |       |
|------|------|------|-------|------|------|------|------|-------|
| 5.6  | 7.77 | 7.43 | 8.44  | 8.86 | 7.72 | 7.27 | 4.25 | 10.99 |
| 6.65 | 8.14 | 7.19 | 7.33  | 8.24 | 4.56 | 6.31 | 5.01 | 10.56 |
| 6.39 | 7.38 | 7.95 | 8.3   | 5.59 | 5.44 | 7.34 | 5.67 | 10.35 |
| 6.16 | 7.6  | 6.81 | 8.19  | 6.24 | 4.95 | 7.2  | 5.01 | 10.66 |
| 3.88 | 6.14 | 3.14 | 7.68  | 7.68 | 6.14 | 7.74 | 6.95 | 9.36  |
| 6.82 | 6.99 | 8.48 | 10.28 | 6.09 | 4.15 | 4.69 | 5.69 | 10.26 |
| 6.59 | 6.96 | 6.42 | 9.8   | 4.77 | 3.77 | 4.59 | 3.93 | 9.76  |
| 7.15 | 6.79 | 6.15 | 9.97  | 4.94 | 3.94 | 4.64 | 3.16 | 9.76  |
| 2.86 | 7.15 | 1.27 | 7.49  | 7.01 | 6.97 | 7.36 | 7.09 | 8.16  |
| 4.85 | 7.33 | 6.85 | 7.81  | 7.01 | 6.61 | 6.56 | 6.75 | 9.38  |
| 6.76 | 8.48 | 7.5  | 8.7   | 6.3  | 6.16 | 5.72 | 6.77 | 10.27 |
| 7.16 | 8.5  | 8.6  | 9.25  | 7.17 | 5.75 | 6.14 | 6.89 | 10.58 |
| 6.71 | 8.08 | 8.74 | 9.58  | 7.88 | 5.21 | 6.73 | 6.08 | 10.8  |
| 6.67 | 7.53 | 8.32 | 8.64  | 7.17 | 4.71 | 6.65 | 6.78 | 10.47 |
| 7.07 | 9.49 | 6.54 | 10.91 | 7.71 | 2.54 | 5.35 | 5.87 | 11.46 |
| 6.78 | 8.21 | 7.34 | 8.55  | 5.58 | 5.12 | 5.63 | 5.68 | 10.25 |
| 5.46 | 7.58 | 7.15 | 8.23  | 6.73 | 6.25 | 5.68 | 5.86 | 9.71  |
| 6.28 | 8.22 | 7.37 | 8.63  | 5.53 | 4.4  | 4.96 | 6.09 | 10.39 |

1  
2  
3  
4  
5  
6  
7  
8  
9  
10  
11  
12  
13  
14  
15  
16  
17  
18  
19  
20  
21  
22  
23  
24  
25  
26  
27  
28  
29  
30  
31  
32  
33  
34  
35  
36  
37  
38  
39  
40  
41  
42  
43  
44  
45  
46  
47  
48  
49  
50  
51  
52  
53  
54  
55  
56  
57  
58  
59  
60

| ITGB1BP1 | ITGB2 | ITGB3 | ITGB4 | ITGB6 | ITGB7 | ITGB8 | ITM2A | JAG1  |
|----------|-------|-------|-------|-------|-------|-------|-------|-------|
| 6.36     | 8.75  | 5.81  | 9.04  | 6.59  | 6.1   | 7.94  | 7.73  | 7.91  |
| 6.1      | 8.7   | 7.01  | 10.74 | 7.51  | 5.33  | 7.81  | 6.55  | 8.92  |
| 5.64     | 8.46  | 6.74  | 10.47 | 7.48  | 4.94  | 8.07  | 6.61  | 8.77  |
| 5.31     | 8.92  | 7.34  | 11.01 | 7.53  | 5.35  | 7.73  | 7.93  | 9.23  |
| 7.35     | 7.14  | 7.35  | 8.43  | 3.33  | 1.01  | 8.58  | 4.01  | 2.01  |
| 6.27     | 8.21  | 6.71  | 9.8   | 6.51  | 5.93  | 8.15  | 6.67  | 8.39  |
| 5.83     | 8.43  | 6.75  | 10.11 | 6.53  | 5.9   | 8.07  | 6.76  | 8.75  |
| 3.98     | 9.35  | 7.49  | 11.71 | 8.21  | 6.68  | 7.81  | 7.53  | 8.98  |
| 3.95     | 9.67  | 4.95  | 10.95 | 7.54  | 6.25  | 7.02  | 7.27  | 9.23  |
| 5.58     | 7.66  | 5.72  | 11.24 | 7.18  | 4.86  | 7.64  | 5.08  | 8.59  |
| 4.19     | 8.29  | 5.99  | 11.45 | 7.2   | 5.93  | 7.89  | 7.58  | 9.16  |
| 4.77     | 8.83  | 6.79  | 11.51 | 7.33  | 5.49  | 7.53  | 7.07  | 9.52  |
| 6.39     | 7.19  | 5.58  | 10.58 | 6.43  | 4.8   | 8.43  | 5.93  | 8.83  |
| 6.73     | 8.02  | 6.23  | 9.95  | 5.82  | 5.48  | 8.28  | 7.23  | 8.59  |
| 3.77     | 10.33 | 5.94  | 12.08 | 7.74  | 7.52  | 6.58  | 8.61  | 7.7   |
| 6.83     | 8.69  | 6.23  | 9.96  | 6.56  | 6.43  | 8.24  | 7.11  | 8.16  |
| 7.04     | 8.12  | 6.38  | 10.64 | 6.5   | 5.29  | 8.57  | 7.15  | 8.6   |
| 6.99     | 8.11  | 6.54  | 11.14 | 5.67  | 5.15  | 8.63  | 6.35  | 8.28  |
| 5.76     | 10.6  | 6.39  | 11.56 | 6.27  | 8.52  | 7.24  | 8.7   | 9.59  |
| 5.78     | 9.56  | 6.69  | 11.16 | 7.89  | 7.53  | 8.62  | 8.03  | 10.04 |
| 5.86     | 10.45 | 6.28  | 10.53 | 6.32  | 8.06  | 8.32  | 9     | 9.56  |
| 5.24     | 8.38  | 6.81  | 10.91 | 7.51  | 4.9   | 8.54  | 6.89  | 8.8   |
| 4.37     | 8.3   | 6.62  | 11    | 7.46  | 5.48  | 8.48  | 6.81  | 8.82  |
| 3.89     | 8.5   | 6.97  | 10.8  | 7.69  | 5.35  | 8.49  | 6.73  | 8.79  |
| 4.67     | 9.36  | 4.6   | 5.23  | 1.43  | 6.21  | 5.23  | 6.87  | 7.08  |
| 4.3      | 7.3   | 5.86  | 11.68 | 6.92  | 6.24  | 7.46  | 6.3   | 9.49  |
| 4.52     | 7.38  | 5.69  | 11.47 | 6.73  | 6.19  | 7.29  | 7.01  | 9.08  |
| 5.64     | 7.91  | 6.12  | 11.07 | 7.11  | 6.04  | 8.12  | 6.52  | 8.79  |
| 6.12     | 7.34  | 5.48  | 10.41 | 5.43  | 5.31  | 7.52  | 5.74  | 9.38  |
| 5.84     | 8.23  | 6.04  | 10.17 | 6.86  | 5.33  | 8     | 6.93  | 9.32  |
| 5.52     | 6.98  | 5.52  | 10.27 | 6.2   | 3.52  | 7.88  | 6.05  | 8.88  |
| 6.41     | 7.98  | 5.96  | 10.49 | 5.84  | 4.96  | 8.16  | 6.46  | 8.85  |
| 6.47     | 9.7   | 5.3   | 7.56  | 0.35  | 7.67  | 6.72  | 8.16  | 6     |
| 4.81     | 8.94  | 6.45  | 10.4  | 5.64  | 4.92  | 7.64  | 6.69  | 9.49  |
| 4.93     | 8.44  | 6.7   | 10.98 | 6.8   | 5.34  | 7.11  | 6.41  | 9.49  |
| 5.33     | 9.2   | 6.23  | 10.64 | 5.38  | 5.28  | 7.7   | 7.1   | 9.42  |
| 4.15     | 9.97  | 4.35  | 10.71 | 7.82  | 7.4   | 6.82  | 8.23  | 8.08  |
| 5.19     | 9.34  | 5.65  | 11.18 | 6.92  | 7.24  | 6.72  | 7.51  | 9.35  |
| 4.76     | 9.75  | 5.22  | 10.86 | 6.07  | 7.85  | 7.13  | 8     | 8.73  |
| 5.17     | 9.94  | 4.65  | 10.67 | 6.15  | 7.83  | 7.16  | 8.17  | 8.53  |
| 5.78     | 7.93  | 5.97  | 8.33  | 5.83  | 4.94  | 7.33  | 5.37  | 7.65  |
| 6.41     | 7.05  | 6.05  | 8.25  | 6.05  | 4.29  | 7.59  | 4.07  | 7.87  |
| 6.31     | 6.5   | 6.15  | 8.21  | 5.43  | 3.39  | 7.71  | 4.03  | 7.83  |
| 5.27     | 6.84  | 5.82  | 8.66  | 6.93  | 5.31  | 7.85  | 4.52  | 8.11  |
| 2.86     | 7.67  | 3.86  | 8.32  | 5.67  | 5.67  | 3.86  | 5.18  | 7.03  |
| 4.71     | 7.38  | 6.02  | 10.3  | 6.36  | 5.48  | 7.72  | 6.97  | 8.2   |
| 4.64     | 7.86  | 6.25  | 10.55 | 6.21  | 5.04  | 7.64  | 7.28  | 8.72  |
| 5.87     | 7.92  | 6.33  | 10    | 5.67  | 5.2   | 7.53  | 7.73  | 8.86  |
| 6.16     | 10    | 5.96  | 11.5  | 6.33  | 6.74  | 8.35  | 7.83  | 9.43  |
| 6.26     | 9.08  | 6.2   | 11.1  | 7.1   | 5.82  | 9.26  | 6.29  | 9.4   |
| 6.11     | 9.11  | 5.5   | 11.1  | 6.28  | 6.25  | 9.46  | 6.68  | 8.92  |

<https://mc.manuscriptcentral.com/gut>

|    |      |      |      |       |       |      |       |      |       |
|----|------|------|------|-------|-------|------|-------|------|-------|
| 1  |      |      |      |       |       |      |       |      |       |
| 2  | 6.06 | 9.48 | 6.36 | 10.89 | 7.15  | 6.9  | 9.24  | 7.34 | 9.43  |
| 3  | 5.81 | 7.31 | 5.46 | 11.13 | 6.37  | 5.2  | 7.28  | 5.12 | 9.86  |
| 4  | 6.46 | 7.23 | 6.96 | 11.12 | 6.7   | 4.94 | 7.95  | 5.68 | 9.29  |
| 5  | 5.95 | 7.15 | 6.49 | 11.37 | 6.95  | 5.6  | 7.8   | 4.81 | 9.11  |
| 6  | 6.31 | 7.92 | 6.22 | 11    | 6.38  | 5.29 | 7.99  | 5.61 | 9.12  |
| 7  |      |      |      |       |       |      |       |      |       |
| 8  | 6.53 | 9.06 | 5.14 | 11.04 | 5.96  | 6.69 | 8.52  | 8.31 | 10.36 |
| 9  | 6.51 | 8.61 | 6    | 11.47 | 7.17  | 5.25 | 9.08  | 7.09 | 10.53 |
| 10 | 6.62 | 6.75 | 5.54 | 11.53 | 6.33  | 3.96 | 9.02  | 5.49 | 10.34 |
| 11 | 6.11 | 8.25 | 6.39 | 10.99 | 6.27  | 4.76 | 9.04  | 7.17 | 10.6  |
| 12 | 4.71 | 8.83 | 3.9  | 9.91  | 4.39  | 6.7  | 8.6   | 7.28 | 7.67  |
| 13 | 4.63 | 8.57 | 6.13 | 10.71 | 7.1   | 6.95 | 7.84  | 7.67 | 8.49  |
| 14 | 4.34 | 8.06 | 5.72 | 10.48 | 5.31  | 6.39 | 7.99  | 6.9  | 7.99  |
| 15 | 4.98 | 8.39 | 5.4  | 10.27 | 4.62  | 6.88 | 7.48  | 7.28 | 7.71  |
| 16 | 5.15 | 9.4  | 6.74 | 10.24 | 5.15  | 5.15 | 8.96  | 5.15 | 7.47  |
| 17 | 6.18 | 9.64 | 5.88 | 11.48 | 6.31  | 7.04 | 9.32  | 6.37 | 6.7   |
| 18 | 6.76 | 9.27 | 6.02 | 10.38 | 5.82  | 6.57 | 8.65  | 6.3  | 6.44  |
| 19 | 7.66 | 8.37 | 7.26 | 9.84  | 1.83  | 2.57 | 10.15 | 1.83 | 0.24  |
| 20 | 7.42 | 8.12 | 7.34 | 9.93  | 0.77  | 0.77 | 10.21 | 3.1  | 3.1   |
| 21 |      |      |      |       |       |      |       |      |       |
| 22 | 6.29 | 6.92 | 5.89 | 11.31 | 6.88  | 7.09 | 8.02  | 5.35 | 9.95  |
| 23 | 6.29 | 6.64 | 5.49 | 11.6  | 7     | 7.78 | 7.86  | 4.72 | 9.98  |
| 24 | 6.64 | 7.76 | 5.8  | 11.28 | 7.12  | 7.08 | 7.83  | 5.76 | 9.79  |
| 25 | 5.7  | 8.24 | 5.77 | 10.3  | 7.1   | 5.38 | 9.3   | 7.07 | 9.74  |
| 26 | 5.83 | 7.69 | 6.03 | 10.12 | 6.91  | 4.67 | 9.38  | 6.96 | 9.37  |
| 27 | 7.24 | 7.78 | 6.66 | 9.42  | 6.96  | 3.05 | 9.23  | 7.26 | 8.85  |
| 28 | 6.68 | 9.15 | 6.44 | 11.7  | 8.06  | 7.82 | 7.84  | 8.18 | 10.28 |
| 29 | 6.85 | 9.08 | 6.29 | 11.84 | 7.98  | 7.01 | 8.69  | 7.3  | 10.51 |
| 30 | 7.05 | 9.44 | 6.42 | 11.63 | 6.42  | 6.47 | 8.3   | 7.46 | 10.51 |
| 31 | 6.63 | 8.7  | 6.34 | 9.59  | 5.4   | 6.27 | 7.34  | 6.17 | 8.3   |
| 32 | 6.11 | 8.46 | 6.05 | 9.19  | 3.98  | 6.05 | 7.57  | 6.41 | 8.09  |
| 33 | 6.46 | 8.84 | 5.68 | 9.2   | 4.85  | 5.51 | 7.42  | 6.38 | 7.94  |
| 34 | 7.12 | 8.4  | 6.23 | 10.62 | 7.33  | 5.44 | 8.5   | 7.54 | 9.39  |
| 35 | 6.67 | 8.22 | 6.22 | 10.91 | 7.7   | 4.37 | 8.75  | 5.62 | 8.72  |
| 36 | 7.33 | 7.99 | 6.55 | 10.86 | 7.51  | 4.38 | 8.95  | 5.38 | 8.65  |
| 37 | 6.31 | 8.02 | 6.66 | 11.41 | 10.84 | 4.9  | 8.7   | 5.98 | 8.42  |
| 38 | 6.54 | 8.19 | 6.49 | 11.49 | 10.23 | 5.13 | 8.47  | 6.05 | 8.3   |
| 39 | 6.46 | 8.61 | 6.33 | 11    | 10.56 | 5.31 | 8.67  | 6.03 | 8.48  |
| 40 | 7.05 | 8.96 | 6.63 | 10.21 | 8.56  | 6.41 | 8.84  | 6.86 | 7.73  |
| 41 | 7.05 | 8.96 | 6.63 | 10.21 | 8.56  | 6.41 | 8.84  | 6.86 | 7.73  |
| 42 | 6.61 | 8.01 | 6.43 | 11.21 | 8.61  | 5.15 | 9.03  | 5.54 | 7.43  |
| 43 | 6.93 | 7.82 | 7.04 | 11.07 | 9.33  | 5.26 | 9.18  | 6.33 | 7.66  |
| 44 | 6.84 | 8.29 | 6.08 | 11.17 | 9.6   | 4.9  | 9.83  | 6.48 | 8.35  |
| 45 | 7.23 | 8.67 | 6.49 | 7.8   | 3.14  | 6.46 | 7.97  | 7.14 | 7.18  |
| 46 | 6.77 | 8.45 | 6.6  | 9.45  | 5.76  | 6.16 | 8.11  | 6.45 | 9.05  |
| 47 | 6.5  | 8.27 | 6.66 | 10.03 | 6.14  | 6.1  | 8.1   | 5.97 | 8.87  |
| 48 | 7.2  | 8.2  | 6.47 | 9.52  | 6.23  | 5.61 | 8.27  | 6.7  | 8.2   |
| 49 | 5.7  | 8.84 | 5.4  | 10.9  | 6.8   | 5.7  | 9.32  | 6.25 | 8.18  |
| 50 | 5.43 | 6.98 | 5.21 | 11.35 | 7.08  | 4.83 | 8.76  | 4.6  | 7.99  |
| 51 | 4.42 | 9.97 | 5.52 | 11.22 | 6.75  | 5.52 | 8.51  | 6.27 | 7.88  |
| 52 | 6.92 | 8.76 | 5.99 | 9.33  | 5.51  | 6.22 | 8.17  | 7    | 7.6   |
| 53 | 6.98 | 8.42 | 6.92 | 9.45  | 5.1   | 4.26 | 8.49  | 6.51 | 8.39  |
| 54 | 6.93 | 8.2  | 6.78 | 9.57  | 5.26  | 3.92 | 8.35  | 6.07 | 8.51  |
| 55 | 6.9  | 7.65 | 6.33 | 9.86  | 7.08  | 5.26 | 8.55  | 6.2  | 8.94  |

|    |      |       |      |       |       |      |       |      |       |
|----|------|-------|------|-------|-------|------|-------|------|-------|
| 1  |      |       |      |       |       |      |       |      |       |
| 2  | 6.7  | 7.19  | 6.08 | 10.17 | 8.07  | 5.59 | 8.93  | 5.17 | 9.75  |
| 3  | 7.42 | 7.41  | 6.82 | 10.24 | 7.52  | 4.42 | 8.68  | 3.87 | 8.06  |
| 4  | 6.09 | 9.86  | 4.92 | 9.8   | 7.21  | 7.34 | 8.1   | 7.95 | 8.69  |
| 5  | 6.12 | 9.16  | 5.75 | 11.42 | 8.38  | 6.34 | 8.81  | 7.15 | 9.68  |
| 6  | 6.37 | 9.72  | 6.42 | 10.8  | 6.66  | 5.7  | 8.7   | 7.28 | 9.05  |
| 7  | 3.99 | 9.55  | 5.11 | 11.86 | 9.25  | 7.51 | 7.12  | 8.04 | 8.84  |
| 8  | 5.7  | 8.31  | 5.59 | 10.33 | 10.09 | 5.68 | 7.99  | 5.45 | 8.31  |
| 9  | 5.51 | 8.55  | 5.93 | 10.32 | 10.32 | 5.59 | 8.16  | 6.06 | 8.69  |
| 10 | 4.08 | 10.4  | 6.89 | 12.13 | 11.62 | 7.08 | 6.95  | 7.49 | 7.99  |
| 11 | 2.79 | 9.61  | 5.32 | 10.83 | 6.28  | 6.57 | 9.29  | 8.46 | 9.12  |
| 12 | 2.81 | 7.59  | 5.74 | 11.08 | 5.4   | 5.88 | 8.98  | 7.42 | 9.13  |
| 13 | 6    | 6.65  | 6.02 | 10.39 | 4.75  | 4.85 | 9.13  | 6.67 | 8.77  |
| 14 | 2.26 | 8.78  | 5.58 | 12.37 | 6.85  | 5.72 | 7.39  | 7.65 | 8.35  |
| 15 | 8.52 | 7.76  | 7.41 | 8.81  | 0.79  | 0.79 | 9.2   | 2.01 | 1.2   |
| 16 | 4.95 | 6.73  | 5.5  | 10.75 | 6.65  | 5.08 | 5.65  | 4.03 | 8.79  |
| 17 | 4.69 | 6.6   | 5.36 | 10.86 | 6.55  | 5.36 | 4.96  | 5.08 | 8.95  |
| 18 | 5.52 | 6.89  | 5.35 | 10.84 | 6.21  | 5.43 | 6.04  | 5.47 | 8.84  |
| 19 | 5.08 | 9.37  | 5.76 | 11.46 | 9.33  | 7.62 | 8.23  | 8.26 | 10.02 |
| 20 | 6.02 | 9.17  | 4.94 | 11.08 | 9.55  | 6.68 | 8.36  | 7.39 | 9.18  |
| 21 | 5.5  | 10.18 | 4.85 | 11.51 | 9.54  | 6.97 | 8.34  | 7.94 | 9.74  |
| 22 | 6.16 | 9.33  | 5.16 | 12.84 | 6.16  | 5.16 | 6.75  | 6.75 | 5.16  |
| 23 | 5.02 | 7.56  | 5.99 | 10.94 | 3.72  | 5.09 | 9.23  | 6.2  | 8.22  |
| 24 | 4.86 | 8.97  | 5.34 | 10.62 | 6.21  | 6.15 | 8.94  | 7.19 | 8.4   |
| 25 | 4.5  | 7.67  | 5.88 | 10.67 | 8.11  | 4.77 | 7.18  | 8.13 | 8.49  |
| 26 | 3.91 | 8.46  | 6.55 | 10.89 | 8.52  | 5.55 | 7.1   | 8.2  | 8.64  |
| 27 | 4.79 | 9.12  | 5.79 | 9.82  | 7.64  | 5.3  | 8.16  | 8.03 | 9.5   |
| 28 | 7.41 | 7.46  | 6.49 | 8.5   | 3     | 2    | 8.24  | 4.32 | 4.9   |
| 29 | 7.53 | 7.56  | 6.76 | 8.19  | 2.44  | 2.86 | 8.44  | 3.44 | 3.18  |
| 30 | 7.63 | 6.98  | 7.02 | 7.67  | 2.77  | 1.77 | 8.09  | 3.35 | 3.77  |
| 31 | 5.33 | 8.19  | 4.01 | 9.85  | 8.16  | 5.89 | 7.85  | 6.87 | 9     |
| 32 | 6.18 | 7.57  | 5.59 | 9.41  | 7.24  | 4.64 | 7.67  | 6.45 | 8.16  |
| 33 | 4.97 | 7.32  | 5.24 | 10.77 | 7.69  | 5.28 | 7.8   | 6.38 | 8.21  |
| 34 | 6.06 | 8.05  | 5.51 | 9.17  | 6.44  | 5.4  | 7.88  | 7.26 | 9.32  |
| 35 | 6.68 | 7.46  | 5.81 | 8.83  | 3.91  | 2.45 | 7.74  | 2.77 | 3.45  |
| 36 | 7.05 | 6.38  | 6.03 | 9.22  | 4.9   | 2.25 | 7.17  | 2.25 | 5.71  |
| 37 | 6.66 | 6.6   | 5.79 | 9.09  | 5.72  | 2.34 | 7.08  | 3.74 | 6.3   |
| 38 | 7.15 | 6.65  | 6.04 | 7.6   | 0     | 0    | 8.95  | 0    | 0     |
| 39 | 7.12 | 6.76  | 5.86 | 7.46  | 2.92  | 3.34 | 7.34  | 1.34 | 2.34  |
| 40 | 7.12 | 6.65  | 5.49 | 7.36  | 3.9   | 1.1  | 7.51  | 3.1  | 3.68  |
| 41 | 7.26 | 6.77  | 6.5  | 7.6   | 3.31  | 0.31 | 7.52  | 3.31 | 4.7   |
| 42 | 5.87 | 6.32  | 4.73 | 7.66  | 2.41  | 2.41 | 10.46 | 2.41 | 2.41  |
| 43 | 7.61 | 7.82  | 7.01 | 8.64  | 4.86  | 2.06 | 7.89  | 4.23 | 4.76  |
| 44 | 8.04 | 7.67  | 7.06 | 8.37  | 0.33  | 2.13 | 8.54  | 3.13 | 0.33  |
| 45 | 6.98 | 8.28  | 6.54 | 11.07 | 6.39  | 3.67 | 7.61  | 4.67 | 8.67  |
| 46 | 7.67 | 7.44  | 6.33 | 9.44  | 4.96  | 0.75 | 8.3   | 2.56 | 6.63  |
| 47 | 7.23 | 7.98  | 5.9  | 10.05 | 2.88  | 4.79 | 7.86  | 6.11 | 6.92  |
| 48 | 7.95 | 7.68  | 6.91 | 9.15  | 0.3   | 0.3  | 8.67  | 3.62 | 4.88  |
| 49 | 8.17 | 7.2   | 7.28 | 7.59  | 0.71  | 2.71 | 8.95  | 1.71 | 0.71  |
| 50 | 7.97 | 7.27  | 6.42 | 8.79  | 1.48  | 0.9  | 9.29  | 2.9  | 4.22  |
| 51 | 6.48 | 7.65  | 5.4  | 7.97  | 5.53  | 4.96 | 7.86  | 5.04 | 7.75  |
| 52 | 6.42 | 8.33  | 5.68 | 8.49  | 6.66  | 5.72 | 8.14  | 5.14 | 8.42  |
| 53 | 6.58 | 8.48  | 5.84 | 8.31  | 6.3   | 6.17 | 7.8   | 5.04 | 8.06  |
| 54 |      |       |      |       |       |      |       |      |       |
| 55 |      |       |      |       |       |      |       |      |       |
| 56 |      |       |      |       |       |      |       |      |       |
| 57 |      |       |      |       |       |      |       |      |       |
| 58 |      |       |      |       |       |      |       |      |       |
| 59 |      |       |      |       |       |      |       |      |       |
| 60 |      |       |      |       |       |      |       |      |       |

<https://mc.manuscriptcentral.com/gut>

1  
2  
3  
4  
5  
6  
7  
8  
9  
10  
11  
12  
13  
14  
15  
16  
17  
18  
19  
20  
21  
22  
23  
24  
25  
26  
27  
28  
29  
30  
31  
32  
33  
34  
35  
36  
37  
38  
39  
40  
41  
42  
43  
44  
45  
46  
47  
48  
49  
50  
51  
52  
53  
54  
55  
56  
57  
58  
59  
60

|      |       |      |       |      |      |      |      |       |
|------|-------|------|-------|------|------|------|------|-------|
| 6.79 | 8.34  | 5.4  | 8.5   | 6.13 | 5.88 | 8.49 | 5.82 | 8.2   |
| 5.76 | 8.93  | 5.37 | 10.23 | 7.45 | 6.07 | 7.97 | 7.43 | 8.32  |
| 6.04 | 8.4   | 6.88 | 10.74 | 7.43 | 6.27 | 8.23 | 6.96 | 8.5   |
| 6.13 | 7.4   | 5.79 | 10.3  | 7.72 | 5.7  | 8.06 | 6.36 | 8.39  |
| 6.12 | 7.98  | 5.72 | 10.51 | 7.89 | 5.58 | 7.89 | 6.54 | 8.45  |
| 7.17 | 9.03  | 5.76 | 10.34 | 4.93 | 7.26 | 8.3  | 7.6  | 8.68  |
| 5.65 | 9.02  | 6.3  | 12.13 | 7.46 | 6.75 | 8.54 | 7.44 | 8.75  |
| 5.47 | 8.59  | 6.02 | 11.71 | 7    | 6.61 | 8.95 | 6.97 | 8.85  |
| 6.03 | 9.87  | 6.57 | 11.19 | 6.52 | 7.18 | 8.52 | 8.92 | 8.28  |
| 5.52 | 9.53  | 6.41 | 12.1  | 8.72 | 6.12 | 7.96 | 6.01 | 10.07 |
| 5.66 | 9.23  | 6.27 | 11.08 | 8.54 | 5.87 | 9.1  | 6.82 | 9.66  |
| 5.91 | 9.58  | 6.49 | 11.17 | 8.82 | 5.63 | 9.24 | 6.29 | 9.83  |
| 5.62 | 9.23  | 6.49 | 11.42 | 8.55 | 5.39 | 9.07 | 6.68 | 9.76  |
| 6.3  | 9.3   | 4.84 | 9.48  | 7.9  | 5.78 | 7.72 | 6.84 | 8.77  |
| 5.34 | 9.45  | 5.92 | 9.95  | 8.21 | 5.34 | 7.71 | 7.73 | 9.07  |
| 6.47 | 9.34  | 6.39 | 10    | 7.98 | 5.7  | 7.99 | 7.47 | 8.68  |
| 4    | 10.02 | 4.85 | 10.39 | 5.39 | 7.65 | 8.42 | 8.75 | 8.91  |
| 3.99 | 8.96  | 5.88 | 11.44 | 8.22 | 5.62 | 8.51 | 6.82 | 8.87  |
| 4.69 | 9.65  | 7.04 | 10.88 | 8.36 | 6.47 | 8.49 | 7.65 | 9.35  |
| 5.39 | 8.59  | 4.68 | 10.72 | 6.95 | 6.62 | 6.84 | 7.9  | 9.45  |
| 5.67 | 7.04  | 6.02 | 10.54 | 7    | 4.3  | 7.83 | 5.27 | 8.68  |
| 5.59 | 6.23  | 5.69 | 11.04 | 7.37 | 4.12 | 8.03 | 5.15 | 8.67  |
| 5.91 | 8.19  | 6.53 | 10.77 | 6.06 | 6.69 | 7.93 | 8.22 | 8.67  |
| 5.63 | 8.25  | 5.74 | 10.8  | 5.63 | 6.06 | 7.86 | 8.92 | 8.33  |
| 5.47 | 9.15  | 6.85 | 12.71 | 7.47 | 4.74 | 6.47 | 7.47 | 8.44  |
| 5.12 | 9.57  | 3.53 | 6.77  | 3.36 | 6.95 | 5.41 | 7.35 | 6.68  |
| 5.38 | 8.53  | 5.38 | 8.25  | 4.6  | 6.15 | 7.33 | 6.7  | 7.39  |
| 5.22 | 8.61  | 5.49 | 7.52  | 4.01 | 5.22 | 6.29 | 5.26 | 7.48  |
| 6.07 | 9.48  | 6.42 | 7.29  | 2.9  | 5.9  | 7.39 | 7.11 | 8.15  |
| 6.97 | 6.28  | 6.15 | 7.49  | 1.76 | 3.34 | 7.28 | 4.34 | 1.76  |
| 6.18 | 6.89  | 6.15 | 8.49  | 2.72 | 2.3  | 7.42 | 3.89 | 3.53  |
| 6.77 | 6.53  | 6.21 | 7.34  | 1.88 | 0.88 | 7.59 | 3.69 | 0.88  |
| 6.31 | 6.57  | 6.04 | 7.54  | 2.54 | 0.96 | 7.3  | 2.96 | 1.96  |
| 5.87 | 7.84  | 4.68 | 9.18  | 5.51 | 4.45 | 6.95 | 5.45 | 7.48  |
| 6.17 | 7.06  | 5.57 | 9.3   | 3.47 | 2.66 | 7.31 | 4.95 | 6.65  |
| 5.72 | 7.37  | 5.19 | 9.23  | 3.57 | 2.57 | 7.22 | 5.01 | 7.01  |
| 5.8  | 7.63  | 5.21 | 9.25  | 3.81 | 3.07 | 7.24 | 5.71 | 7.42  |
| 6.05 | 10.08 | 4.26 | 7.19  | 0.35 | 8.46 | 3.94 | 8.49 | 6.5   |
| 6.51 | 8.03  | 5.55 | 10.59 | 7.42 | 6.51 | 8.6  | 7.02 | 8.15  |
| 4.33 | 9.07  | 5.81 | 11.85 | 8.5  | 7.93 | 6.78 | 7.28 | 10.14 |
| 4.23 | 9.97  | 5.55 | 12.8  | 7.66 | 7.88 | 5.4  | 7.72 | 8.71  |
| 5.65 | 8.37  | 5.26 | 10.17 | 6.93 | 6.12 | 6.83 | 5.92 | 8.39  |
| 5.51 | 9.83  | 7.32 | 12.3  | 7.1  | 7.68 | 4.51 | 7.51 | 8.6   |
| 5.54 | 8.23  | 6.02 | 10.76 | 7.91 | 5.96 | 7.07 | 6.33 | 8.74  |
| 5.64 | 8.17  | 5.52 | 10.43 | 8.26 | 5.14 | 7.53 | 6.38 | 8.65  |
| 3.68 | 5.89  | 4.59 | 9.98  | 5.07 | 3.49 | 7.99 | 3.85 | 8.17  |
| 5.19 | 9.12  | 5.66 | 9.48  | 4.44 | 6.21 | 7.22 | 6.68 | 7.68  |
| 5.23 | 8.5   | 5.67 | 9.9   | 4.28 | 5.8  | 7.42 | 6.36 | 8.11  |
| 6.11 | 8.86  | 6.11 | 9.25  | 4.16 | 5.54 | 7.59 | 6.54 | 7.86  |
| 4.16 | 8.15  | 3.82 | 9.24  | 5.22 | 5.55 | 5.76 | 6.86 | 7.82  |
| 5.39 | 7.34  | 5.23 | 9     | 4.34 | 4.43 | 7.31 | 6.08 | 7.07  |
| 5.54 | 6.91  | 4.83 | 9.03  | 4.88 | 4.16 | 6.72 | 6.06 | 6.93  |

<https://mc.manuscriptcentral.com/gut>

|      |      |      |       |      |      |      |      |      |
|------|------|------|-------|------|------|------|------|------|
| 4.6  | 7.49 | 5.65 | 9.76  | 6.04 | 4.25 | 6.77 | 7.27 | 7.23 |
| 5.1  | 6.71 | 4.91 | 9.32  | 5.74 | 3.1  | 6.77 | 5.1  | 9.32 |
| 5.11 | 5.59 | 5.63 | 8.46  | 5.23 | 2.59 | 6.26 | 4.17 | 7.65 |
| 4.66 | 5.85 | 4.88 | 8.43  | 5.77 | 2.07 | 6.39 | 4.29 | 7.59 |
| 6.01 | 7.17 | 5.72 | 8.42  | 4.55 | 1.55 | 7.48 | 1.55 | 4.14 |
| 3.02 | 8.58 | 4.57 | 10.35 | 5.47 | 5.77 | 7.07 | 6.7  | 9.32 |
| 3.15 | 7.82 | 3.07 | 9.98  | 5.61 | 5.18 | 7.51 | 5.94 | 8.79 |
| 3.52 | 7.58 | 3.67 | 10.03 | 5.76 | 4.78 | 7.41 | 5.73 | 8.67 |
| 7.62 | 6.58 | 6.7  | 7.53  | 0.27 | 0.27 | 8.11 | 2.27 | 1.27 |
| 6.7  | 7.53 | 5.64 | 8.71  | 5.82 | 5.42 | 7.45 | 6.67 | 6.83 |
| 4.86 | 8.43 | 4.9  | 10.37 | 9.11 | 5.65 | 7.66 | 7.57 | 8.8  |
| 5.89 | 8.04 | 6.1  | 10.41 | 7.62 | 4.89 | 7.83 | 6.38 | 7.96 |
| 4.21 | 8.14 | 6.11 | 10.36 | 7.93 | 5.62 | 7.37 | 7.5  | 8    |
| 5.74 | 8.43 | 5.62 | 9.63  | 7.55 | 5.03 | 7.63 | 7.87 | 8.7  |
| 2.54 | 9.24 | 4.87 | 13.01 | 7.94 | 4.87 | 4.13 | 6    | 7.9  |
| 4.5  | 9.43 | 4.56 | 9.09  | 4.56 | 6.53 | 6.23 | 7.47 | 6.58 |
| 5.69 | 8.44 | 5.36 | 8.85  | 4.69 | 5.96 | 7.16 | 6.67 | 6.91 |
| 3.92 | 9.41 | 5.11 | 9.39  | 4.61 | 6.53 | 6.02 | 7.15 | 6.81 |



1  
2  
3  
4  
5  
6  
7  
8  
9  
10  
11  
12  
13  
14  
15  
16  
17  
18  
19  
20  
21  
22  
23  
24  
25  
26  
27  
28  
29  
30  
31  
32  
33  
34  
35  
36  
37  
38  
39  
40  
41  
42  
43  
44  
45  
46  
47  
48  
49  
50  
51  
52  
53  
54  
55  
56  
57  
58  
59  
60

| JAM2 | JAM3 | JUN  | KCNJ8 | KDM1A | KDR  | KIAA1462 | KISS1 | KLK3 |
|------|------|------|-------|-------|------|----------|-------|------|
| 6.63 | 8.03 | 7.9  | 7.31  | 7.76  | 6.48 | 5.86     | 6.93  | 5.05 |
| 6.6  | 8.29 | 8.53 | 7.61  | 7.89  | 8.12 | 5.74     | 6.3   | 4.74 |
| 6.97 | 8.21 | 8.24 | 7.54  | 7.9   | 7.57 | 5.76     | 6.21  | 5.08 |
| 8.32 | 9.03 | 9.11 | 8     | 7.99  | 7.69 | 6.29     | 4.27  | 2.99 |
| 7.59 | 8.82 | 7.58 | 8.45  | 7.72  | 6.71 | 6.62     | 8.48  | 6.47 |
| 6.22 | 7.91 | 8.01 | 7.27  | 7.6   | 6.65 | 5.74     | 6.4   | 4.35 |
| 6.07 | 7.76 | 8.23 | 7.39  | 7.69  | 6.83 | 5.98     | 6.41  | 4.96 |
| 6.3  | 7.93 | 8.35 | 7.2   | 7.78  | 6.33 | 6.7      | 2.72  | 0.39 |
| 6.2  | 7.72 | 7.93 | 6.78  | 8.35  | 6.6  | 6.2      | 3.69  | 0.37 |
| 5.55 | 7.67 | 7.84 | 6.96  | 8.54  | 5.69 | 5.66     | 6     | 4.23 |
| 6.65 | 7.36 | 8.1  | 5.51  | 8.61  | 6.49 | 5.13     | 3.38  | 0.38 |
| 7.17 | 8.23 | 8.31 | 6.44  | 8.52  | 6.66 | 6.33     | 3     | 0.68 |
| 6.4  | 7.66 | 9.07 | 7.15  | 8.69  | 6.83 | 5.72     | 6.71  | 4.88 |
| 6.91 | 8.04 | 9    | 7.47  | 8.63  | 7.51 | 6.63     | 7.02  | 5.4  |
| 8.19 | 8.6  | 8.23 | 8.03  | 7.98  | 6.9  | 7.47     | 4.35  | 2.77 |
| 7.09 | 8.93 | 9.17 | 7.79  | 8.25  | 6.94 | 6.07     | 7.09  | 5.4  |
| 7.31 | 8.85 | 9.48 | 7.48  | 8.43  | 6.75 | 5.93     | 6.96  | 5.2  |
| 7.33 | 9.11 | 9.34 | 8.13  | 8.22  | 6.29 | 5.62     | 6.89  | 6.08 |
| 7.7  | 8.56 | 8.8  | 7.71  | 8.08  | 7.8  | 7.03     | 2.48  | 1.9  |
| 7.17 | 8.25 | 9.01 | 6.85  | 8.53  | 8.19 | 6.1      | 1.89  | 0    |
| 7.98 | 8.74 | 8.74 | 7.67  | 8.23  | 8.25 | 6.75     | 2.31  | 1.08 |
| 7.06 | 8.9  | 9.04 | 6.99  | 8.81  | 7.36 | 6.24     | 5.54  | 3.15 |
| 7.4  | 8.82 | 9.58 | 6.94  | 8.66  | 7.41 | 5.45     | 5.93  | 2.52 |
| 7.64 | 9.41 | 9.24 | 7.21  | 8.55  | 6.86 | 5.85     | 5.48  | 2.7  |
| 5.92 | 8.67 | 8.25 | 5.6   | 8.77  | 5.64 | 6.92     | 2.75  | 0.43 |
| 5.68 | 7.54 | 9.78 | 5.3   | 8.83  | 7.07 | 4.52     | 2.45  | 2.13 |
| 5.33 | 7.6  | 9.65 | 5.56  | 8.86  | 7.06 | 4.22     | 4.52  | 1.52 |
| 6.63 | 7.53 | 9.46 | 7.07  | 8.5   | 6.76 | 5.34     | 6.47  | 4.24 |
| 5.93 | 7.88 | 7.74 | 7.05  | 8.13  | 6.52 | 5.65     | 6.47  | 5.19 |
| 6.51 | 8.23 | 7.46 | 7.75  | 7.86  | 6.79 | 5.47     | 6.66  | 5.02 |
| 6.08 | 7.96 | 7.85 | 7.08  | 8.21  | 6.85 | 5.37     | 6.57  | 4.84 |
| 6.82 | 8.54 | 7.74 | 7.84  | 7.8   | 6.86 | 6.41     | 7.12  | 5.52 |
| 6.68 | 8.19 | 8.08 | 7.41  | 7.87  | 6.8  | 5.82     | 6.75  | 5.32 |
| 7.53 | 9.04 | 8.4  | 7.17  | 8.06  | 7.43 | 6.5      | 3.38  | 1.64 |
| 5.88 | 8.24 | 8.36 | 6.43  | 8.16  | 7.61 | 5.97     | 3.61  | 2.2  |
| 7.87 | 8.56 | 8.18 | 7.16  | 7.91  | 7.46 | 6.35     | 3.47  | 0.47 |
| 6.03 | 6.92 | 7.51 | 5.94  | 7.43  | 5.49 | 5.35     | 2.77  | 2.03 |
| 5.69 | 6.44 | 7.57 | 4.9   | 8.16  | 5.65 | 4.9      | 2.21  | 1.4  |
| 6.65 | 7.33 | 7.77 | 6.61  | 7.62  | 5.54 | 4.83     | 3.95  | 2.69 |
| 6.93 | 7.12 | 7.64 | 6.31  | 7.6   | 5.44 | 4.91     | 2.55  | 0    |
| 5.97 | 7.75 | 7.46 | 7.49  | 7.17  | 6.69 | 5.97     | 6.48  | 5.24 |
| 6.11 | 7.6  | 7.63 | 7.41  | 7.26  | 6.6  | 5.78     | 6.54  | 5.29 |
| 6.03 | 7.33 | 7.01 | 7.22  | 7.39  | 6.69 | 5.97     | 6.71  | 5.26 |
| 5.57 | 7.06 | 6.97 | 6.35  | 7.38  | 5.72 | 5.43     | 5.96  | 4.52 |
| 4.45 | 8.56 | 7.38 | 7.77  | 8.18  | 3.86 | 7.11     | 2.86  | 2.86 |
| 7.03 | 8.2  | 7.58 | 6.12  | 8.04  | 6.22 | 5.44     | 4.31  | 1.31 |
| 7.22 | 8.57 | 7.76 | 6.51  | 8.13  | 6.93 | 5.67     | 3.7   | 0    |
| 7.54 | 8.88 | 8.22 | 6.77  | 7.98  | 6.55 | 6.13     | 3.62  | 1.81 |
| 6.82 | 8.4  | 9.39 | 6.72  | 8.82  | 6.06 | 6.39     | 4.33  | 2.63 |
| 5.71 | 7.84 | 9.22 | 6.03  | 9     | 6.99 | 6.65     | 1.01  | 2.33 |
| 5.54 | 7.53 | 9.35 | 5.3   | 8.68  | 6.74 | 5.62     | 2.5   | 1.5  |

<https://mc.manuscriptcentral.com/gut>

|    |      |      |       |      |      |      |      |      |      |
|----|------|------|-------|------|------|------|------|------|------|
| 1  |      |      |       |      |      |      |      |      |      |
| 2  | 6.91 | 8.58 | 9.55  | 6.33 | 8.7  | 6.62 | 6.57 | 2.4  | 1.66 |
| 3  | 6.03 | 7.85 | 9.34  | 7.02 | 8.88 | 5.94 | 5.94 | 6.93 | 5.52 |
| 4  | 6.26 | 8.21 | 9.7   | 7.34 | 9.23 | 6.83 | 5.92 | 6.58 | 5.4  |
| 5  | 6.29 | 7.9  | 9.02  | 6.87 | 9.24 | 6.77 | 5.74 | 6.8  | 5.12 |
| 6  | 6.57 | 8.17 | 9.18  | 7.33 | 9.21 | 6.46 | 5.8  | 6.89 | 5.25 |
| 7  | 6.8  | 7.94 | 8.63  | 6.86 | 8.46 | 6.69 | 5.84 | 5.23 | 3.69 |
| 8  | 6.38 | 8.01 | 8.57  | 6.64 | 8.72 | 7.03 | 6.08 | 3.71 | 1.25 |
| 9  | 5.11 | 6.89 | 8.16  | 5.86 | 8.7  | 6.21 | 4.43 | 2.81 | 0.59 |
| 10 | 6.96 | 8.64 | 8.84  | 7.28 | 8.74 | 6.25 | 5.39 | 3.76 | 0.44 |
| 11 | 5.39 | 6.63 | 7.93  | 5.81 | 8.48 | 5.73 | 5.28 | 3.49 | 1.17 |
| 12 | 5.71 | 7.17 | 8.27  | 5.93 | 9.03 | 6.59 | 4.63 | 4.35 | 0.54 |
| 13 | 4.72 | 6.82 | 7.31  | 5.62 | 8.95 | 6.27 | 4.77 | 4.77 | 2.14 |
| 14 | 6.39 | 7.77 | 7.49  | 5.71 | 9.05 | 6.15 | 5.11 | 3.88 | 0.98 |
| 15 | 5.15 | 7.47 | 8.85  | 7.74 | 7.47 | 6.74 | 5.15 | 8.32 | 6.15 |
| 16 | 5.96 | 7.92 | 8.99  | 7.81 | 8.58 | 4.96 | 6.25 | 7.65 | 6.74 |
| 17 | 6.41 | 8.01 | 8.68  | 8.04 | 8.53 | 5.98 | 6.4  | 7.24 | 6.36 |
| 18 | 7.75 | 9.41 | 9.62  | 9.42 | 8.93 | 5.7  | 7.27 | 8.94 | 8.24 |
| 19 | 7.72 | 9.36 | 9.5   | 8.9  | 8.83 | 6.48 | 6.5  | 8.88 | 8.09 |
| 20 | 4.66 | 8.68 | 8.4   | 6.75 | 8.74 | 6.31 | 5.53 | 6.16 | 4.89 |
| 21 | 5.55 | 8.5  | 8.85  | 6.77 | 8.67 | 6    | 5.17 | 6.35 | 5.26 |
| 22 | 6.13 | 8.66 | 8.65  | 7.37 | 8.61 | 6.4  | 5.43 | 6.79 | 5.26 |
| 23 | 7.32 | 8.74 | 9.38  | 7.11 | 8.8  | 7.32 | 5.57 | 5.63 | 2.27 |
| 24 | 7.14 | 8.53 | 9.43  | 6.58 | 8.67 | 7.11 | 5.92 | 5.77 | 3.98 |
| 25 | 7.68 | 8.53 | 8.75  | 8.18 | 8.03 | 7.56 | 7.24 | 7.16 | 5.14 |
| 26 | 7.1  | 8.11 | 9.85  | 6.25 | 8.86 | 7.05 | 5.39 | 4.34 | 3.44 |
| 27 | 6.96 | 8.42 | 9.56  | 6.82 | 8.83 | 6.99 | 5.56 | 5.68 | 3.5  |
| 28 | 7.21 | 8.8  | 9.35  | 7.32 | 8.93 | 7.1  | 6.08 | 4.86 | 2.28 |
| 29 | 6.45 | 7.83 | 9.92  | 6.99 | 9.06 | 6.66 | 6.27 | 7.03 | 5.27 |
| 30 | 6.65 | 7.84 | 9.85  | 6.93 | 9.15 | 6.52 | 6.07 | 6.39 | 4.62 |
| 31 | 6.87 | 8.16 | 9.7   | 7.52 | 9.02 | 6.42 | 5.88 | 6.56 | 5.28 |
| 32 | 7.16 | 8.7  | 10.26 | 8.07 | 8.79 | 6.76 | 6.67 | 7.33 | 5.44 |
| 33 | 6.84 | 8.2  | 9.2   | 7.65 | 8.73 | 6.72 | 5.69 | 7.62 | 5.41 |
| 34 | 6.43 | 8.33 | 9.63  | 7.7  | 8.74 | 7.14 | 6.1  | 7.82 | 5.42 |
| 35 | 6.74 | 8.23 | 8.62  | 7.82 | 8.63 | 6.25 | 6.14 | 6.96 | 5.4  |
| 36 | 6.71 | 8.17 | 8.39  | 7.75 | 8.42 | 6.52 | 6.24 | 7.02 | 5.3  |
| 37 | 7.14 | 8.53 | 8.78  | 7.92 | 8.65 | 6.52 | 6.82 | 7.01 | 5.31 |
| 38 | 7.05 | 8.75 | 8.83  | 8    | 8.14 | 6.88 | 6.39 | 7.61 | 5.68 |
| 39 | 7.05 | 8.75 | 8.83  | 8    | 8.14 | 6.88 | 6.39 | 7.61 | 5.68 |
| 40 | 7.29 | 8.84 | 9.25  | 7.57 | 8.33 | 6.28 | 5.79 | 7.38 | 5.54 |
| 41 | 7.68 | 9.18 | 9.2   | 7.75 | 8.23 | 6.92 | 6.08 | 7.45 | 5.43 |
| 42 | 7.29 | 9.07 | 9.01  | 7.65 | 8.45 | 6.43 | 6.29 | 7.1  | 5.47 |
| 43 | 7.27 | 8.33 | 7.96  | 7.96 | 7.84 | 7.51 | 6.53 | 7.65 | 6.01 |
| 44 | 6.94 | 8.45 | 8.33  | 7.43 | 8.03 | 7.43 | 5.62 | 7.2  | 5.58 |
| 45 | 7.39 | 8.25 | 8.46  | 6.91 | 8.16 | 7.27 | 5.34 | 6.77 | 5.2  |
| 46 | 7.81 | 8.59 | 8.03  | 7.83 | 7.91 | 7.31 | 6.47 | 7.76 | 5.52 |
| 47 | 6.44 | 7.86 | 10.32 | 6.99 | 9.05 | 6.14 | 5.51 | 3.53 | 2.05 |
| 48 | 5.36 | 7.21 | 10.03 | 5.69 | 9.21 | 5.57 | 5.21 | 3.54 | 2.4  |
| 49 | 6.86 | 7.75 | 9.73  | 7.44 | 8.94 | 6.45 | 6.45 | 4.1  | 0.52 |
| 50 | 7.52 | 8.36 | 7.97  | 7.96 | 7.78 | 7.11 | 6.15 | 7.4  | 5.83 |
| 51 | 8.2  | 9.06 | 8.72  | 8.02 | 7.87 | 7.31 | 6.6  | 7.09 | 5.66 |
| 52 | 7.79 | 9.22 | 8.03  | 8.22 | 8.06 | 6.67 | 6.5  | 7.34 | 5.74 |
| 53 | 6.55 | 8.17 | 8.3   | 7.46 | 7.34 | 7.22 | 6.15 | 6.81 | 5.98 |

<https://mc.manuscriptcentral.com/gut>

1  
2  
3  
4  
5  
6  
7  
8  
9  
10  
11  
12  
13  
14  
15  
16  
17  
18  
19  
20  
21  
22  
23  
24  
25  
26  
27  
28  
29  
30  
31  
32  
33  
34  
35  
36  
37  
38  
39  
40  
41  
42  
43  
44  
45  
46  
47  
48  
49  
50  
51  
52  
53  
54  
55  
56  
57  
58  
59  
60

|      |      |       |      |      |      |      |      |      |
|------|------|-------|------|------|------|------|------|------|
| 6.62 | 8.12 | 8.1   | 7.52 | 7.6  | 7.06 | 5.82 | 6.8  | 5.67 |
| 7.48 | 8.6  | 8.09  | 8.24 | 7.52 | 6.88 | 6.57 | 7.2  | 6.79 |
| 6.7  | 8.34 | 9.1   | 6.81 | 7.93 | 6.4  | 5.9  | 5.71 | 5.03 |
| 7.62 | 8.59 | 10.13 | 7.09 | 8.46 | 6.62 | 5.96 | 4.88 | 4.08 |
| 8.03 | 9.38 | 9.13  | 7.31 | 8.26 | 6.68 | 6.6  | 5.01 | 2.49 |
| 6.9  | 8.15 | 8.55  | 7.91 | 8.26 | 5.73 | 6.69 | 3.87 | 1.41 |
| 4.94 | 7.54 | 8.38  | 5.7  | 8.54 | 6.53 | 5.61 | 4.01 | 2.36 |
| 5.82 | 7.8  | 8.33  | 6.17 | 8.65 | 6.77 | 5.97 | 3.93 | 1.34 |
| 7.82 | 8.6  | 8.25  | 8.4  | 7.99 | 6.08 | 7.85 | 3.49 | 2.49 |
| 6.38 | 7.76 | 7.83  | 6.68 | 7.53 | 6.7  | 6.81 | 2.38 | 0.79 |
| 4.58 | 7.3  | 9     | 5.35 | 8.33 | 5.92 | 5.01 | 3.08 | 0.49 |
| 6.02 | 7.78 | 8.26  | 7.13 | 7.88 | 6.51 | 5.41 | 6.65 | 5.56 |
| 7.12 | 8.28 | 8.7   | 7.72 | 7.51 | 5.26 | 7.62 | 4.26 | 2.26 |
| 7.72 | 9.22 | 8.5   | 9.12 | 7.79 | 6.79 | 8.1  | 9.48 | 6.58 |
| 5.83 | 7.21 | 8.26  | 5.67 | 8.61 | 6.32 | 5.27 | 4.53 | 1.53 |
| 4.92 | 6.85 | 8.41  | 5.36 | 8.57 | 6.8  | 5.08 | 2.64 | 0.83 |
| 5.81 | 7.19 | 8.26  | 6.18 | 8.44 | 6.16 | 5.47 | 4.61 | 3.22 |
| 5.64 | 7.26 | 8.78  | 5.52 | 8    | 6    | 4.93 | 3.14 | 0.43 |
| 6.03 | 7.44 | 8.32  | 6.55 | 7.95 | 5.03 | 5.56 | 6.72 | 5.19 |
| 6.11 | 7.34 | 8.47  | 6.51 | 7.92 | 5.37 | 5.82 | 5.82 | 4.57 |
| 6.75 | 7.49 | 5.16  | 7.49 | 7.16 | 5.16 | 7.97 | 6.75 | 5.16 |
| 4.09 | 6.83 | 8.35  | 5.22 | 8.2  | 6.43 | 4.22 | 4.81 | 2.3  |
| 5.93 | 7.33 | 8.3   | 5.62 | 8.07 | 6.58 | 4.86 | 4.44 | 2.12 |
| 6.18 | 8.73 | 7.27  | 7.45 | 8.2  | 5.27 | 6.13 | 4.35 | 1.18 |
| 7.26 | 8.96 | 7.28  | 7.59 | 7.85 | 6.86 | 7.06 | 4.37 | 2.49 |
| 7.21 | 8.63 | 8.36  | 7.52 | 8.33 | 6.93 | 6.98 | 3.13 | 1.54 |
| 7.42 | 8.46 | 8.21  | 8.46 | 7.88 | 7.23 | 6.39 | 8.44 | 6.52 |
| 7.18 | 8.67 | 8.19  | 8.43 | 7.8  | 7.35 | 6.67 | 8.41 | 6.9  |
| 7.41 | 8.76 | 8.07  | 8.28 | 7.96 | 7.38 | 6.41 | 8.35 | 6.9  |
| 6.05 | 8.05 | 8.73  | 6.55 | 6.79 | 6.08 | 5.92 | 0.01 | 0.01 |
| 7.23 | 8.95 | 7.16  | 6.59 | 7.09 | 6.52 | 5.93 | 0    | 0    |
| 7.03 | 8.35 | 7.9   | 6.36 | 6.97 | 6.3  | 5.6  | 1.69 | 1.69 |
| 7.31 | 8.82 | 9.57  | 6.55 | 6.91 | 6.36 | 6.01 | 1.74 | 0.16 |
| 6.41 | 8.07 | 7.76  | 7.6  | 7.31 | 6.04 | 6.38 | 7.38 | 6.15 |
| 6.52 | 7.75 | 6.71  | 7.45 | 7.08 | 6.38 | 5.3  | 6.88 | 5.71 |
| 5.96 | 7.38 | 6.96  | 7.23 | 6.84 | 6.14 | 5.25 | 6.87 | 5.23 |
| 6.74 | 8.05 | 7.98  | 7.94 | 7.75 | 5.72 | 5.57 | 7.69 | 6.46 |
| 6.76 | 7.86 | 7.53  | 7.84 | 7.31 | 7.06 | 6.24 | 7.14 | 6.19 |
| 6.74 | 7.42 | 7.31  | 7.52 | 7.03 | 6.98 | 6.18 | 7.31 | 5.62 |
| 6.8  | 7.66 | 7.24  | 7.38 | 7.24 | 6.75 | 5.74 | 7.26 | 5.83 |
| 4.41 | 7.5  | 8.27  | 6.41 | 7.73 | 3.41 | 4    | 8.14 | 6.22 |
| 7.43 | 8.63 | 8.4   | 8.58 | 8.18 | 7.46 | 6.7  | 7.96 | 6.81 |
| 7.77 | 9.04 | 8.64  | 9.05 | 8.37 | 7.73 | 7.01 | 8.73 | 7.61 |
| 6.29 | 8.12 | 7.89  | 7.69 | 7.73 | 6.48 | 5.51 | 7.45 | 6.51 |
| 7.3  | 8.56 | 8.22  | 8.44 | 8.06 | 7.49 | 6.56 | 8.22 | 7.12 |
| 7.18 | 8.05 | 8.01  | 8.06 | 7.65 | 6.89 | 6.31 | 7.45 | 6.13 |
| 7.47 | 8.12 | 8.27  | 8.67 | 7.96 | 7.21 | 6.4  | 8.63 | 6.86 |
| 7.61 | 8.19 | 8.07  | 8.85 | 8.15 | 7.53 | 6.49 | 8.72 | 6.66 |
| 7.63 | 8.22 | 8.61  | 8.42 | 8.61 | 6.95 | 6.65 | 8.25 | 6.72 |
| 6.08 | 7.75 | 8.08  | 7.22 | 8.04 | 6.29 | 5.87 | 6.12 | 3.91 |
| 6.22 | 7.42 | 8.21  | 7.23 | 8.11 | 6.39 | 5.58 | 6.15 | 4.27 |
| 6.34 | 7.67 | 8.42  | 7.24 | 8.07 | 6.84 | 5.71 | 6.1  | 5.21 |

<https://mc.manuscriptcentral.com/gut>

|    |      |       |      |      |      |      |      |      |      |
|----|------|-------|------|------|------|------|------|------|------|
| 1  |      |       |      |      |      |      |      |      |      |
| 2  | 6.44 | 7.51  | 8.35 | 7.34 | 7.91 | 6.76 | 6.38 | 6.38 | 4.66 |
| 3  | 6.8  | 8.27  | 9.5  | 7.32 | 8.84 | 6.91 | 6.49 | 6.45 | 4.84 |
| 4  | 7.23 | 8.58  | 9.76 | 7.76 | 8.81 | 6.9  | 6.04 | 7.37 | 4.86 |
| 5  | 6.47 | 7.7   | 9.89 | 7.2  | 9.09 | 6.72 | 5.83 | 7.12 | 5.26 |
| 6  | 6.01 | 7.69  | 9.75 | 7.04 | 9.12 | 6.73 | 5.86 | 7.02 | 4.41 |
| 7  | 7.26 | 8.65  | 8.3  | 8.9  | 8.91 | 6.39 | 6.38 | 7.18 | 5.95 |
| 8  | 7.66 | 8.84  | 9.28 | 8.4  | 9.18 | 6.7  | 6.13 | 3.43 | 2.43 |
| 9  | 7.02 | 8.12  | 9.59 | 7.86 | 9.39 | 6.44 | 5.02 | 4.07 | 3.98 |
| 10 | 8.95 | 9.75  | 9.27 | 8.88 | 9    | 6.52 | 6.79 | 4.55 | 3.74 |
| 11 | 5.67 | 8.73  | 9.09 | 7.39 | 8.01 | 7.57 | 6.97 | 5.81 | 3.76 |
| 12 | 6.85 | 8.97  | 9.11 | 7.5  | 8.12 | 7.37 | 6.05 | 6.32 | 4.34 |
| 13 | 6.17 | 9.16  | 9.05 | 7.19 | 7.92 | 7.27 | 6.17 | 6.09 | 3.97 |
| 14 | 6.86 | 8.97  | 8.77 | 7.69 | 7.91 | 7.07 | 6.19 | 5.39 | 3.23 |
| 15 | 5.89 | 7.84  | 7.9  | 7.23 | 8.48 | 6.19 | 5.97 | 6.41 | 4.84 |
| 16 | 6.24 | 7.74  | 8.21 | 6.49 | 8.64 | 6.42 | 5.12 | 3.32 | 0    |
| 17 | 7.95 | 9.18  | 8.55 | 8.2  | 8.24 | 6.75 | 6.83 | 6.52 | 4.85 |
| 18 | 7.3  | 8.34  | 9.05 | 7.04 | 7.94 | 7.4  | 5.97 | 2    | 1.58 |
| 19 | 6.67 | 8.46  | 7.91 | 6.16 | 8.46 | 6.82 | 5.25 | 2.25 | 2.67 |
| 20 | 7.83 | 9.14  | 8.13 | 7.55 | 8.07 | 7.26 | 6.52 | 2.84 | 0.52 |
| 21 | 6.63 | 7.79  | 8.85 | 5.86 | 8.48 | 6.04 | 5.39 | 3.39 | 0.93 |
| 22 | 5.69 | 7.9   | 9.39 | 6.23 | 8.91 | 6.46 | 5.77 | 3.24 | 2.71 |
| 23 | 4.29 | 6.89  | 9.49 | 5.52 | 8.71 | 5.85 | 4.39 | 2.94 | 1.06 |
| 24 | 7.19 | 8.48  | 8.77 | 7.3  | 7.78 | 6.91 | 5.63 | 6.19 | 5.28 |
| 25 | 6.48 | 8.41  | 8.88 | 7.23 | 8.1  | 6.84 | 5.51 | 6.1  | 4.84 |
| 26 | 8.96 | 10.36 | 9.22 | 8.28 | 7.32 | 5.74 | 7.24 | 5.15 | 5.74 |
| 27 | 6.06 | 6.55  | 7.38 | 5.12 | 7.41 | 5.82 | 5.36 | 1.95 | 0.36 |
| 28 | 6.31 | 7.46  | 8.16 | 6.08 | 7.46 | 6.52 | 4.25 | 4.96 | 4.49 |
| 29 | 4.85 | 6.88  | 7.62 | 5.85 | 7.57 | 5.76 | 4.16 | 3.57 | 3.46 |
| 30 | 7.45 | 9.02  | 8.87 | 5.81 | 7.45 | 5.48 | 4.22 | 1.9  | 1.9  |
| 31 | 6.4  | 7.34  | 7.43 | 7.62 | 7.46 | 6.85 | 5.57 | 7.12 | 5.85 |
| 32 | 6.67 | 6.89  | 7.15 | 7.27 | 7.13 | 6.42 | 5.42 | 6.74 | 5.42 |
| 33 | 7.09 | 7.42  | 7.69 | 7.79 | 7.28 | 6.84 | 5.74 | 7.45 | 5.74 |
| 34 | 6.51 | 7.6   | 7.13 | 7.7  | 7.11 | 6.38 | 4.96 | 7.15 | 5.42 |
| 35 | 5.34 | 6.9   | 7.94 | 6.22 | 6.83 | 5.57 | 4.65 | 5.49 | 4.11 |
| 36 | 6.22 | 7.52  | 7.3  | 6.93 | 6.74 | 6.02 | 5.09 | 6.66 | 4.52 |
| 37 | 6.45 | 7.67  | 7.18 | 6.97 | 6.89 | 6.19 | 5.32 | 6.62 | 4.29 |
| 38 | 6.24 | 7.88  | 7.49 | 6.87 | 6.87 | 5.69 | 5.38 | 6.14 | 4.45 |
| 39 | 7    | 7.87  | 9.43 | 5.26 | 7.89 | 6.11 | 4.81 | 1.94 | 1.35 |
| 40 | 6.46 | 8.34  | 7.77 | 6.22 | 8.39 | 6.78 | 4.78 | 6.27 | 4.63 |
| 41 | 6.49 | 7.42  | 9.1  | 6.51 | 8.31 | 6.91 | 5.37 | 2.42 | 1.42 |
| 42 | 7.69 | 7.99  | 7.91 | 7.4  | 7.82 | 6.48 | 6.4  | 3.82 | 2.23 |
| 43 | 5.57 | 8.05  | 7.76 | 6.64 | 8.2  | 5.88 | 6.15 | 6.79 | 4.76 |
| 44 | 7.83 | 7.97  | 8.32 | 7.97 | 8.6  | 5.51 | 7.83 | 6.1  | 4.51 |
| 45 | 6.58 | 8.28  | 8.19 | 6.34 | 8.28 | 6.45 | 6.04 | 3.19 | 0    |
| 46 | 6.68 | 8.56  | 8.7  | 6.66 | 8.42 | 6.08 | 6.5  | 3.74 | 1.52 |
| 47 | 2.27 | 5.14  | 7.35 | 4.77 | 9.4  | 5.44 | 4.68 | 5.97 | 0.68 |
| 48 | 6.54 | 7.92  | 8.41 | 6.36 | 8.84 | 5.19 | 5.77 | 5.6  | 4.63 |
| 49 | 6.43 | 7.46  | 8.32 | 6.16 | 9.22 | 5.6  | 5.98 | 5.08 | 3.28 |
| 50 | 6.76 | 8     | 8.28 | 7.05 | 8.92 | 5.43 | 5.96 | 6.68 | 4.58 |
| 51 | 5.24 | 7.65  | 8.77 | 6.46 | 7.7  | 4.78 | 6.11 | 0    | 0.57 |
| 52 | 6.76 | 8.29  | 6.87 | 6.83 | 6.95 | 5.78 | 4.99 | 5.7  | 4.62 |
| 53 | 6.39 | 8.27  | 7.15 | 6.52 | 7.38 | 5.81 | 5.04 | 5.56 | 4.36 |

<https://mc.manuscriptcentral.com/gut>

1  
2  
3  
4  
5  
6  
7  
8  
9  
10  
11  
12  
13  
14  
15  
16  
17  
18  
19  
20  
21  
22  
23  
24  
25  
26  
27  
28  
29  
30  
31  
32  
33  
34  
35  
36  
37  
38  
39  
40  
41  
42  
43  
44  
45  
46  
47  
48  
49  
50  
51  
52  
53  
54  
55  
56  
57  
58  
59  
60

|      |      |      |      |      |      |      |      |      |
|------|------|------|------|------|------|------|------|------|
| 7.77 | 8.92 | 7.08 | 7.25 | 7.39 | 5.54 | 5.6  | 3.11 | 2.79 |
| 5.49 | 9.05 | 7.74 | 6.83 | 7.19 | 5.01 | 7.01 | 5.42 | 4.91 |
| 5.17 | 8.26 | 7.72 | 6.31 | 7.89 | 5.05 | 5.05 | 6.56 | 3.91 |
| 4.74 | 8.12 | 7.44 | 5.88 | 7.85 | 5.57 | 4.81 | 6.19 | 3.66 |
| 6.6  | 8.86 | 7.23 | 8.55 | 7.01 | 5.95 | 6.14 | 7.66 | 6.31 |
| 5.4  | 6.8  | 9.03 | 4.92 | 8.23 | 4.57 | 5.15 | 2.37 | 1.15 |
| 3.87 | 5.44 | 8.3  | 4.32 | 8.3  | 4.2  | 3.46 | 2.65 | 0.65 |
| 3.81 | 5.37 | 8.4  | 4.35 | 8.36 | 3.74 | 4.64 | 3.35 | 0.35 |
| 7    | 8.18 | 7.58 | 8.21 | 7.55 | 6.58 | 5.7  | 7.83 | 6.46 |
| 7    | 8.09 | 8.04 | 7.28 | 7.23 | 6.36 | 5.52 | 6.74 | 5.47 |
| 6.42 | 8.43 | 7.5  | 7.28 | 7.6  | 5.27 | 6.43 | 3.35 | 2.24 |
| 6.91 | 8.6  | 7.88 | 7.12 | 7.5  | 5.53 | 5.59 | 5.41 | 4.35 |
| 7.75 | 8.49 | 8.08 | 6.93 | 7.57 | 5.26 | 5.39 | 3.76 | 1.3  |
| 7.62 | 8.97 | 8.65 | 7.1  | 7.8  | 5.74 | 6.35 | 5.3  | 3.93 |
| 6.54 | 6.79 | 8.35 | 7.35 | 7.3  | 4.13 | 7.07 | 5.13 | 2.54 |
| 5.66 | 6.92 | 7.51 | 5.97 | 8.37 | 4.8  | 5.66 | 4.32 | 3.26 |
| 5.91 | 7.29 | 7.61 | 6.83 | 7.62 | 5.28 | 5.3  | 5.66 | 4.69 |
| 5.73 | 6.7  | 7.37 | 5.9  | 8.59 | 4.45 | 5.61 | 4.07 | 2.07 |

1  
2  
3  
4  
5  
6  
7  
8  
9  
10  
11  
12  
13  
14  
15  
16  
17  
18  
19  
20  
21  
22  
23  
24  
25  
26  
27  
28  
29  
30  
31  
32  
33  
34  
35  
36  
37  
38  
39  
40  
41  
42  
43  
44  
45  
46  
47  
48  
49  
50  
51  
52  
53  
54  
55  
56  
57  
58  
59  
60

| KRAS  | KRIT1 | KRT1 | KRT14 | KRT19 | KRT7  | LAD1  | LAMA1 | LAMA3 |
|-------|-------|------|-------|-------|-------|-------|-------|-------|
| 8.81  | 7.28  | 4.37 | 0.56  | 9.07  | 7.79  | 8.36  | 2.37  | 6.15  |
| 8.49  | 7.44  | 4.23 | 10.59 | 10.66 | 8.57  | 9.35  | 2.84  | 7.41  |
| 8.34  | 7.45  | 6.42 | 12.04 | 10.13 | 8.12  | 9.72  | 2.08  | 7.35  |
| 8.62  | 8.07  | 2.5  | 7.17  | 10.18 | 8.9   | 10.04 | 3.5   | 6.89  |
| 7.89  | 2.59  | 6.44 | 3.01  | 9.45  | 8.35  | 9.18  | 1.01  | 6.87  |
| 8.64  | 6.94  | 4.35 | 1.49  | 10.6  | 9.65  | 9.54  | 2.95  | 5.97  |
| 8.69  | 7.12  | 4.38 | 0     | 11.1  | 9.81  | 9.54  | 2.92  | 6.55  |
| 9.03  | 7.27  | 1.98 | 2.39  | 12.03 | 11.64 | 11.3  | 3.85  | 6.42  |
| 9.6   | 7.96  | 1.95 | 3.17  | 9.56  | 6.79  | 8.37  | 3.54  | 3.17  |
| 8.94  | 7.34  | 3.61 | 2.49  | 11.39 | 10    | 9.13  | 1.91  | 7.42  |
| 9.51  | 8.12  | 0.38 | 2.96  | 11.06 | 9.33  | 9.85  | 2.96  | 7.15  |
| 9.49  | 7.8   | 2.27 | 0.68  | 11.59 | 10.1  | 9.35  | 3     | 7.88  |
| 8.24  | 7.99  | 4.04 | 1.18  | 10.07 | 6.51  | 9.28  | 2.35  | 6.33  |
| 8.31  | 8.15  | 4.2  | 1.26  | 9.81  | 7.14  | 9.36  | 2.67  | 6.36  |
| 8.35  | 7.86  | 2.77 | 2.77  | 10.06 | 9.5   | 10.66 | 4.35  | 5.58  |
| 8.26  | 7.37  | 4.11 | 3.53  | 10.34 | 10.1  | 9.31  | 1.94  | 6.87  |
| 8.81  | 7.8   | 4.29 | 6.81  | 11.2  | 9.74  | 9.95  | 4.1   | 7.33  |
| 8.48  | 7.21  | 5.15 | 2.35  | 11.12 | 9.81  | 9.93  | 4.08  | 7.27  |
| 8.93  | 8.19  | 1.48 | 1.9   | 11.64 | 4.42  | 9.15  | 3.6   | 6.36  |
| 9.03  | 8.57  | 1.31 | 2.48  | 11.69 | 5.4   | 8.84  | 2.89  | 6.64  |
| 9.06  | 8.48  | 2.5  | 1.82  | 11.08 | 4.5   | 8.29  | 2.08  | 6.23  |
| 9.03  | 8.34  | 2.47 | 2.47  | 12.14 | 10.77 | 10.37 | 3.73  | 8.01  |
| 9.1   | 8.08  | 1.2  | 3.2   | 12.29 | 10.48 | 10.75 | 2.78  | 8.29  |
| 9.1   | 8.35  | 2.7  | 2.22  | 11.73 | 10.9  | 10.06 | 3.89  | 8.19  |
| 10.55 | 8.12  | 0.43 | 2.43  | 13.56 | 3.23  | 7.28  | 9.94  | 2.75  |
| 9.43  | 7.5   | 1.13 | 1.13  | 14.92 | 9     | 10.1  | 1.13  | 8.44  |
| 8.91  | 7.67  | 2.11 | 1.52  | 14.85 | 8.63  | 10.1  | 1.52  | 8.46  |
| 8.84  | 7.15  | 3.37 | 0.92  | 14.2  | 8.5   | 9.66  | 2.24  | 8.2   |
| 8.39  | 7.84  | 4.16 | 0     | 10.4  | 7.56  | 9.45  | 1.28  | 6.64  |
| 8.5   | 7.76  | 4.02 | 1.77  | 10.69 | 9.05  | 9.42  | 2.58  | 6.92  |
| 8.55  | 8.07  | 3.52 | 1.2   | 10.39 | 8.9   | 9.5   | 2.2   | 6.67  |
| 8.65  | 7.23  | 4.03 | 0.71  | 10.41 | 9.09  | 9.61  | 0.71  | 7.07  |
| 8.16  | 7.65  | 4.25 | 0     | 8.4   | 7.55  | 7.64  | 0.35  | 5.92  |
| 9.59  | 8.6   | 2.38 | 0.06  | 9.52  | 9.16  | 8.62  | 1.06  | 7.72  |
| 9.73  | 8.48  | 2.2  | 2.61  | 11.04 | 8.13  | 9.81  | 2.78  | 8.51  |
| 9.43  | 8.34  | 2.79 | 2.06  | 9.93  | 8.72  | 9.17  | 2.47  | 7.61  |
| 8.62  | 7.2   | 0.45 | 0.45  | 10.4  | 7.06  | 8.85  | 0.45  | 6.51  |
| 8.74  | 7.33  | 0.99 | 6.13  | 11.68 | 9.59  | 8.69  | 2.21  | 8.49  |
| 8.42  | 7.4   | 2.69 | 6.15  | 10.56 | 7.94  | 7.89  | 2.95  | 8.39  |
| 8.46  | 7.28  | 1.33 | 3.2   | 10.45 | 8.64  | 7.74  | 2.07  | 7.04  |
| 8.27  | 6.52  | 4.1  | 0.51  | 9.44  | 9.28  | 8.1   | 3.1   | 6.83  |
| 8.53  | 6.5   | 4.54 | 4.42  | 9.49  | 9.5   | 8.09  | 1.48  | 6.69  |
| 8.08  | 6.41  | 4.39 | 2.22  | 9.27  | 8.95  | 7.88  | 1.22  | 7.08  |
| 8.97  | 6.89  | 3.9  | 0     | 9.75  | 9.71  | 8.39  | 2.14  | 7.17  |
| 9.03  | 5.45  | 2.86 | 2.86  | 11.2  | 7.72  | 9.94  | 6.18  | 5.18  |
| 9.27  | 7.53  | 0.31 | 0.31  | 10.27 | 6.81  | 8.45  | 2.31  | 6.71  |
| 9.13  | 7.62  | 1.58 | 1     | 10.49 | 7.72  | 8.61  | 2     | 7.08  |
| 8.9   | 7.7   | 1.81 | 1.81  | 9.86  | 7.11  | 7.91  | 2.13  | 6.42  |
| 9.41  | 8.35  | 0.63 | 2.96  | 12.08 | 9.14  | 9.23  | 3.96  | 6.36  |
| 9.34  | 8.48  | 1.01 | 3.71  | 12.21 | 9.82  | 9.04  | 3.47  | 6.42  |
| 9.8   | 8.56  | 0.5  | 1.5   | 11.8  | 9.69  | 8.95  | 2.5   | 6.68  |

<https://mc.manuscriptcentral.com/gut>

|    |       |       |      |       |       |       |       |      |      |
|----|-------|-------|------|-------|-------|-------|-------|------|------|
| 1  |       |       |      |       |       |       |       |      |      |
| 2  | 9.42  | 8.44  | 2.4  | 3.25  | 12.04 | 9.92  | 8.86  | 4.72 | 6.74 |
| 3  | 8.37  | 8.17  | 3.2  | 1.03  | 10.27 | 7.18  | 10.64 | 2.84 | 6.22 |
| 4  | 8.49  | 8.42  | 3    | 1.19  | 9.61  | 6.82  | 10.13 | 2.19 | 6.85 |
| 5  | 8.62  | 8.25  | 2.76 | 0.95  | 9.74  | 7.97  | 10.4  | 1.54 | 7.17 |
| 6  | 8.41  | 8.28  | 3.67 | 0.97  | 9.32  | 7.16  | 10.21 | 0.97 | 6.75 |
| 7  |       |       |      |       |       |       |       |      |      |
| 8  | 9.34  | 10.11 | 3.23 | 1.81  | 11.23 | 8.56  | 9.49  | 2.55 | 8.3  |
| 9  | 9.16  | 9.86  | 2.25 | 3.05  | 10.95 | 10.07 | 9.88  | 3.25 | 8.81 |
| 10 | 9.1   | 10.02 | 1.32 | 1.59  | 9.96  | 8.02  | 10.12 | 2    | 9.09 |
| 11 | 9.44  | 9.23  | 0.44 | 2.76  | 10.64 | 8.41  | 9.54  | 2.76 | 7.86 |
| 12 | 9.46  | 8.15  | 1.58 | 1.17  | 9.27  | 3.04  | 8.07  | 1.9  | 5.23 |
| 13 | 9.38  | 8.36  | 1.54 | 3.54  | 10.62 | 6.03  | 8.76  | 2.13 | 5.97 |
| 14 | 9.13  | 8.32  | 1.82 | 1.4   | 10.03 | 5.52  | 8.73  | 2.82 | 5.46 |
| 15 | 9.08  | 8.43  | 0    | 1.56  | 9.72  | 4.73  | 8.29  | 1.56 | 4.79 |
| 16 |       |       |      |       |       |       |       |      |      |
| 17 | 8.61  | 5.15  | 8.74 | 6.15  | 12.78 | 9.96  | 11.72 | 5.15 | 6.15 |
| 18 | 10.01 | 5.18  | 6.92 | 1.79  | 10.92 | 8.51  | 10.68 | 2.79 | 7.79 |
| 19 | 8.59  | 5.8   | 5.92 | 0.86  | 10.22 | 8.07  | 9.57  | 1.86 | 7.88 |
| 20 |       |       |      |       |       |       |       |      |      |
| 21 | 9.15  | 0.24  | 8.04 | 0.24  | 10.83 | 10.01 | 10.34 | 0.24 | 8.21 |
| 22 | 8.38  | 0.77  | 7.31 | 0.77  | 10.94 | 9.84  | 10.65 | 1.77 | 7.74 |
| 23 | 8.51  | 8     | 3.95 | 2.95  | 11.18 | 6.89  | 9.65  | 1.72 | 8.6  |
| 24 | 8.57  | 8.06  | 3.85 | 3.43  | 11.6  | 7.25  | 9.66  | 1.85 | 9.19 |
| 25 | 8.35  | 7.82  | 4.53 | 1.99  | 11.1  | 7.33  | 9.6   | 2.26 | 8.37 |
| 26 | 8.77  | 10.67 | 2.1  | 10.46 | 10.57 | 7.25  | 9.57  | 2.68 | 7.25 |
| 27 | 8.54  | 10.63 | 2.6  | 9.65  | 10.2  | 7.19  | 9.52  | 1.28 | 7.1  |
| 28 | 8.86  | 10.44 | 4.51 | 4.05  | 8.47  | 7.22  | 8.49  | 1.05 | 6.6  |
| 29 | 10.28 | 8.43  | 2.96 | 2.96  | 12.91 | 8.42  | 10.73 | 2.96 | 8.19 |
| 30 | 10.42 | 8.45  | 1.63 | 1.04  | 12.88 | 9.6   | 11.05 | 3.63 | 7.43 |
| 31 | 10.49 | 8.48  | 2.28 | 2.28  | 12.68 | 7.28  | 11.15 | 3.28 | 6.67 |
| 32 | 8.7   | 7.71  | 4.17 | 2.36  | 10.55 | 6.66  | 8.8   | 5.72 | 7.14 |
| 33 |       |       |      |       |       |       |       |      |      |
| 34 | 8.58  | 7.74  | 4.37 | 1.56  | 10.42 | 6.77  | 8.6   | 4.98 | 7.09 |
| 35 | 8.68  | 7.83  | 4.96 | 1.74  | 10.43 | 6.8   | 8.48  | 4.85 | 6.8  |
| 36 | 9.15  | 8.25  | 4.7  | 2.12  | 10.93 | 7.24  | 10.15 | 1.12 | 7.74 |
| 37 | 8.95  | 8.16  | 4.29 | 0.2   | 11.36 | 7.13  | 10.59 | 1.2  | 7.86 |
| 38 | 9     | 8.16  | 4.51 | 2.31  | 11.64 | 7.37  | 10.73 | 1.99 | 7.4  |
| 39 | 8.77  | 7.32  | 4.59 | 4.25  | 11.4  | 11.18 | 9.01  | 2.73 | 8.19 |
| 40 | 8.91  | 7.33  | 4.34 | 4.79  | 11.81 | 10.97 | 9.24  | 3.2  | 8.02 |
| 41 | 8.82  | 7.15  | 4.01 | 4.31  | 11.37 | 10.7  | 9.12  | 3.09 | 7.91 |
| 42 | 10.35 | 7.38  | 4.44 | 0.44  | 11.31 | 10.17 | 8.96  | 2.44 | 6.61 |
| 43 | 10.35 | 7.38  | 4.44 | 0.44  | 11.31 | 10.17 | 8.96  | 2.44 | 6.61 |
| 44 | 11.09 | 7.22  | 4.47 | 2.15  | 12.16 | 11.11 | 10    | 0.15 | 6.75 |
| 45 | 10.64 | 7.17  | 4.98 | 1.76  | 11.96 | 10.76 | 9.52  | 2.5  | 7.17 |
| 46 | 11.05 | 7.65  | 5.01 | 1.69  | 12.05 | 11.02 | 9.21  | 2.27 | 6.87 |
| 47 | 8.54  | 6.6   | 5.56 | 2.14  | 9.29  | 7     | 8.32  | 4.26 | 6.76 |
| 48 | 9.42  | 7.7   | 4.76 | 0.3   | 10.87 | 6.67  | 8.89  | 5.05 | 7.36 |
| 49 | 9.54  | 7.66  | 4.65 | 2.53  | 11.89 | 7.08  | 9.77  | 2.95 | 7.31 |
| 50 | 8.64  | 6.92  | 5.26 | 2.61  | 10.56 | 7.64  | 8.82  | 3.78 | 7.13 |
| 51 | 8.96  | 7.76  | 0.73 | 2.53  | 11.14 | 8.14  | 10.23 | 3.31 | 6.36 |
| 52 | 9.09  | 7.58  | 0.08 | 2.08  | 11.91 | 10.23 | 10.79 | 3.08 | 7.05 |
| 53 | 8.65  | 7.39  | 2.1  | 2.52  | 11.31 | 8.74  | 10.76 | 3.1  | 6.42 |
| 54 | 10.56 | 7.04  | 5.28 | 0.15  | 9.98  | 8.9   | 8.46  | 0.15 | 7.15 |
| 55 | 7.92  | 6.87  | 4.82 | 2.6   | 9.79  | 9.08  | 8.77  | 3.02 | 6.87 |
| 56 | 7.83  | 6.76  | 4.92 | 0.46  | 9.61  | 8.76  | 8.92  | 2.04 | 6.93 |
| 57 | 8.25  | 6.68  | 4.92 | 2.98  | 11.53 | 9.32  | 9.08  | 3.2  | 6.42 |

<https://mc.manuscriptcentral.com/gut>

1  
2  
3  
4  
5  
6  
7  
8  
9  
10  
11  
12  
13  
14  
15  
16  
17  
18  
19  
20  
21  
22  
23  
24  
25  
26  
27  
28  
29  
30  
31  
32  
33  
34  
35  
36  
37  
38  
39  
40  
41  
42  
43  
44  
45  
46  
47  
48  
49  
50  
51  
52  
53  
54  
55  
56  
57  
58  
59  
60

|      |      |      |       |       |       |       |      |      |
|------|------|------|-------|-------|-------|-------|------|------|
| 8.37 | 7.11 | 4.8  | 3.06  | 11.64 | 10.31 | 9     | 1.47 | 6.81 |
| 8.09 | 5.45 | 6.27 | 2.59  | 11.15 | 10.63 | 9.55  | 0.78 | 7.25 |
| 8.49 | 8.13 | 2.57 | 2.25  | 10.55 | 9.7   | 8.52  | 1.25 | 6.1  |
| 9.15 | 8.17 | 3.25 | 12.51 | 11.7  | 10.22 | 10.06 | 3.66 | 8.06 |
| 8.9  | 8.28 | 2.81 | 1.49  | 11.26 | 10.1  | 8.27  | 3.66 | 4.58 |
| 8.4  | 7.34 | 1.41 | 1.99  | 11.36 | 11.08 | 10.46 | 2.73 | 8.54 |
| 8.64 | 7.93 | 2.55 | 4.19  | 11.62 | 10.35 | 9.79  | 3.13 | 8.18 |
| 8.79 | 7.86 | 1.34 | 2.34  | 11.81 | 11.64 | 10    | 4    | 8.49 |
| 8.08 | 6.58 | 4.49 | 3.49  | 12.51 | 13.44 | 12.04 | 4.08 | 6.95 |
| 8.79 | 7.52 | 2.38 | 1.79  | 11.72 | 5.11  | 10.03 | 3.38 | 6.44 |
| 8.79 | 7.36 | 1.49 | 2.08  | 11.08 | 4.66  | 9.94  | 3.08 | 7.15 |
| 8.42 | 6.91 | 3.7  | 1.48  | 10.72 | 6.38  | 9.19  | 0.89 | 6.86 |
| 8.47 | 6.96 | 4.26 | 4.26  | 11.61 | 7.26  | 11.39 | 3.26 | 6.78 |
| 7.98 | 0.79 | 6.2  | 0     | 9.85  | 9.06  | 10.05 | 0.79 | 6.83 |
| 8.13 | 7.56 | 1.95 | 3.27  | 10.91 | 9.11  | 10.41 | 2.53 | 5.85 |
| 8.53 | 7.64 | 1.42 | 2.83  | 10.96 | 9.5   | 10.45 | 2.64 | 5.77 |
| 8.36 | 7.67 | 1.1  | 3.33  | 11    | 9.4   | 10.27 | 1.52 | 5.56 |
| 8.81 | 8.05 | 0.43 | 2.43  | 12.16 | 6.12  | 8.49  | 4.43 | 9.54 |
| 8.04 | 7.21 | 3.58 | 1.77  | 11.05 | 7.31  | 7.96  | 3.02 | 8.97 |
| 8.29 | 7.89 | 3.1  | 1.72  | 11.39 | 7.31  | 7.88  | 3.48 | 9.49 |
| 7.49 | 5.16 | 5.16 | 6.16  | 11.29 | 6.75  | 13.53 | 6.75 | 6.16 |
| 8.68 | 7.58 | 0.72 | 0.72  | 12.19 | 6.56  | 9.38  | 2.46 | 8.34 |
| 8.55 | 7.5  | 0.54 | 0.54  | 11.65 | 7.11  | 9.36  | 2.86 | 8    |
| 9.7  | 7.2  | 2.77 | 2.18  | 11.68 | 9.7   | 10.18 | 2.77 | 7.01 |
| 9.09 | 6.88 | 1.91 | 1.91  | 11.47 | 10.01 | 10.33 | 2.91 | 6.33 |
| 9.17 | 7.77 | 1.54 | 2.54  | 10.92 | 9.03  | 8.47  | 4.45 | 6.35 |
| 7.49 | 4    | 5.8  | 1     | 9.44  | 8.62  | 8.85  | 2    | 7.19 |
| 7.61 | 2.44 | 5.32 | 2.44  | 9.47  | 8.39  | 9.05  | 0.86 | 6.9  |
| 7.26 | 2.77 | 5.85 | 1.77  | 8.81  | 7.72  | 8.43  | 1.77 | 6.85 |
| 9.52 | 7.29 | 0.01 | 1.01  | 9.97  | 9.61  | 7.42  | 2.01 | 5.68 |
| 7.86 | 7.04 | 0    | 0     | 8.6   | 8.62  | 6.78  | 0.59 | 3.5  |
| 8.37 | 7.15 | 0.11 | 0.11  | 10.07 | 9.43  | 8.52  | 2.43 | 5.63 |
| 7.96 | 7.25 | 1.16 | 2.16  | 8.87  | 8.1   | 6.46  | 2.74 | 4.24 |
| 7.11 | 1.45 | 4.77 | 0.45  | 9.36  | 7.75  | 8.28  | 0.45 | 6.5  |
| 7.22 | 3.25 | 4.84 | 0.25  | 9.56  | 6.56  | 8.12  | 1.84 | 5.92 |
| 6.92 | 3.43 | 4.77 | 0     | 10.12 | 7.01  | 7.92  | 0    | 6.38 |
| 7.43 | 0    | 6.04 | 0     | 9.11  | 8.24  | 8.76  | 0.32 | 6.73 |
| 6.69 | 1.34 | 5.58 | 1.34  | 8.53  | 7.71  | 7.58  | 1.34 | 5.73 |
| 6.83 | 2.1  | 5.42 | 2.1   | 8.2   | 7.33  | 7.64  | 2.1  | 6.14 |
| 7.04 | 0.31 | 5.31 | 1.31  | 8.27  | 7.59  | 7.49  | 1.89 | 6.06 |
| 7.46 | 2.41 | 8.43 | 2.41  | 9.69  | 8.14  | 9.85  | 3.41 | 6.58 |
| 8.01 | 2.64 | 6.23 | 1.06  | 9.18  | 8.22  | 8.92  | 3.64 | 7.2  |
| 8.04 | 1.33 | 6.04 | 0     | 9.46  | 8.52  | 9.05  | 0.91 | 7.33 |
| 7.71 | 4.87 | 5.12 | 0.87  | 11.12 | 7.55  | 8.97  | 2.45 | 7.5  |
| 7.86 | 2.33 | 6.07 | 0     | 9.54  | 8.08  | 8.91  | 1.75 | 7.17 |
| 7.94 | 7.21 | 5.53 | 0     | 11.57 | 8.54  | 9.04  | 2.3  | 7.05 |
| 7.98 | 4.88 | 6.02 | 0.3   | 10.42 | 8.39  | 9.17  | 0.3  | 7.13 |
| 8.12 | 2.71 | 6.49 | 2.71  | 9.14  | 7.71  | 8.71  | 2.29 | 7.2  |
| 7.96 | 1.9  | 7.07 | 0     | 10.13 | 8.75  | 9.29  | 0    | 7.46 |
| 8.24 | 7.03 | 4.67 | 0.91  | 9.09  | 5.37  | 7.41  | 1.5  | 5.91 |
| 8.48 | 7.23 | 4.79 | 1.33  | 8.99  | 5.53  | 7.96  | 1.74 | 6.1  |
| 8.26 | 7.18 | 4.04 | 2.04  | 9.1   | 6.65  | 8.01  | 1.62 | 5.76 |

<https://mc.manuscriptcentral.com/gut>



1  
2  
3  
4  
5  
6  
7  
8  
9  
10  
11  
12  
13  
14  
15  
16  
17  
18  
19  
20  
21  
22  
23  
24  
25  
26  
27  
28  
29  
30  
31  
32  
33  
34  
35  
36  
37  
38  
39  
40  
41  
42  
43  
44  
45  
46  
47  
48  
49  
50  
51  
52  
53  
54  
55  
56  
57  
58  
59  
60

|       |      |      |      |       |       |       |      |      |
|-------|------|------|------|-------|-------|-------|------|------|
| 8.38  | 7.09 | 4.73 | 0.27 | 9.37  | 6.88  | 7.7   | 1.85 | 6.36 |
| 8.74  | 8.45 | 4.22 | 0.52 | 11.02 | 12.84 | 9.9   | 3.1  | 6.3  |
| 9.15  | 8.17 | 3.56 | 1.65 | 11.81 | 12.28 | 9.7   | 2.97 | 7.31 |
| 8.85  | 7.89 | 4.2  | 0.74 | 10.62 | 12.44 | 10.5  | 0.74 | 6.89 |
| 8.8   | 8.08 | 4.27 | 0    | 10.82 | 12.41 | 10.66 | 2.54 | 7.53 |
| 9.58  | 7.83 | 4.97 | 1.76 | 11.17 | 10.04 | 9.6   | 3.35 | 6.79 |
| 10.02 | 8.12 | 3.65 | 1.84 | 13.28 | 12    | 11.12 | 3.16 | 7.32 |
| 10.44 | 8.25 | 1.98 | 2.56 | 12.97 | 10.74 | 10.44 | 1.98 | 7.51 |
| 9.56  | 8.09 | 3.74 | 1.74 | 12.23 | 10.76 | 9.72  | 3.55 | 5.87 |
| 9.85  | 8.53 | 3.35 | 0.76 | 12.7  | 6.99  | 9.72  | 3.76 | 7.6  |
| 9.27  | 8.78 | 2.17 | 2.17 | 10.79 | 8.94  | 9.64  | 2.49 | 7.27 |
| 9.53  | 8.72 | 3.55 | 1.97 | 10.94 | 8.9   | 9.56  | 2.97 | 7.51 |
| 9.46  | 8.98 | 2.87 | 1.65 | 11.09 | 8.25  | 9.86  | 2.39 | 7.6  |
| 8.08  | 7.35 | 3.48 | 0.48 | 11.55 | 8.58  | 9.28  | 1.48 | 6.66 |
| 8.13  | 7.84 | 0.51 | 1.51 | 11.85 | 9.66  | 9.6   | 2.09 | 6.44 |
| 7.84  | 6.98 | 4.23 | 0.15 | 10.91 | 10.09 | 9.15  | 2.47 | 6.52 |
| 8.47  | 8.15 | 2.58 | 1.58 | 9.41  | 6.96  | 8.46  | 3.32 | 6.61 |
| 9.05  | 7.85 | 0.67 | 2.99 | 11.39 | 10.05 | 9.69  | 1.67 | 7.61 |
| 8.82  | 7.91 | 2.1  | 1.52 | 11.22 | 10.23 | 9.07  | 3.52 | 7.52 |
| 8.11  | 7.92 | 0.93 | 2.25 | 10.21 | 9.17  | 9.63  | 1.93 | 7.85 |
| 8.77  | 8.01 | 0.54 | 1.54 | 11.21 | 5.33  | 9.11  | 3.13 | 6.66 |
| 8.49  | 8.45 | 1.06 | 1.48 | 11.45 | 3.73  | 9.4   | 2.8  | 7    |
| 8.52  | 7.13 | 2.69 | 1.11 | 10.6  | 9.61  | 9.6   | 2.11 | 6.46 |
| 8.53  | 7.18 | 1.93 | 2.51 | 10.47 | 9.58  | 9.82  | 2.93 | 5.74 |
| 8.96  | 6.96 | 5.15 | 4.74 | 11.28 | 11.13 | 11.52 | 5.15 | 5.15 |
| 7.58  | 7.36 | 0.36 | 0.36 | 7.09  | 3.53  | 7.41  | 1.36 | 3.68 |
| 7.89  | 6.86 | 1.79 | 1.79 | 8.93  | 6.18  | 7.65  | 2.38 | 4.25 |
| 7.94  | 7.03 | 0.76 | 0    | 8.28  | 4.57  | 8.14  | 2.35 | 4.57 |
| 7.94  | 8.13 | 1.9  | 2.9  | 8.44  | 5.6   | 6.71  | 3.48 | 3.9  |
| 6.28  | 1.76 | 4.93 | 1.76 | 8.57  | 7.22  | 7.43  | 1.76 | 5.93 |
| 7.27  | 2.72 | 4.53 | 0.72 | 9.03  | 7.13  | 8.27  | 0.72 | 5.3  |
| 7.26  | 0.88 | 5.47 | 0.88 | 8.36  | 7.07  | 7.72  | 0.88 | 6.01 |
| 7.24  | 1.96 | 4.96 | 0.96 | 8.36  | 7.13  | 7.74  | 2.96 | 5.66 |
| 7.8   | 5.85 | 3.17 | 0    | 9.32  | 8.44  | 8.19  | 0    | 5.11 |
| 7.19  | 5.36 | 3.36 | 1.25 | 8.57  | 7.96  | 8.14  | 0    | 5.22 |
| 6.97  | 5.74 | 4.35 | 0.77 | 8.52  | 8.36  | 7.73  | 0.77 | 5.41 |
| 7.09  | 5.72 | 3.49 | 1.75 | 8.9   | 8.55  | 7.69  | 2.75 | 5.64 |
| 8.66  | 7.99 | 0.35 | 0.35 | 4.16  | 1.94  | 5.94  | 0.35 | 5.44 |
| 9.39  | 7.8  | 3.78 | 1.46 | 10.35 | 8.2   | 9.51  | 3.05 | 6.42 |
| 8.7   | 7.71 | 0.42 | 2    | 12.38 | 7.21  | 10.01 | 2.42 | 8.71 |
| 8.21  | 6.69 | 3.23 | 2.23 | 11.53 | 8.79  | 11.63 | 3.23 | 7.09 |
| 8.02  | 7.74 | 3.12 | 0    | 8.87  | 7.71  | 9.6   | 2.18 | 6.35 |
| 7.51  | 7.51 | 4.51 | 4.51 | 11    | 8.21  | 11.1  | 5.51 | 7.83 |
| 8.55  | 8.5  | 0.87 | 0    | 10.65 | 7.97  | 9.41  | 2.45 | 6.58 |
| 8.85  | 8.82 | 0    | 2.26 | 9.39  | 8.29  | 9.52  | 2.52 | 6.02 |
| 8.4   | 8.88 | 0.68 | 1.68 | 11.92 | 5.38  | 9.83  | 6.61 | 5.68 |
| 8.5   | 8.11 | 3.68 | 0.98 | 11.3  | 7.55  | 9.97  | 6.57 | 6.03 |
| 8.25  | 8.49 | 0.28 | 0.28 | 11.55 | 7.17  | 9.88  | 7.15 | 5.6  |
| 8.28  | 7.77 | 3.72 | 1.84 | 10.94 | 6.94  | 9.39  | 6.3  | 6.09 |
| 8.11  | 7.21 | 0    | 0    | 10.07 | 9.04  | 8.53  | 1.57 | 4.89 |
| 7.69  | 6.79 | 1.53 | 0.53 | 8.85  | 8.35  | 7.56  | 2.85 | 4.34 |
| 7.56  | 6.67 | 2.83 | 0.83 | 8.99  | 8.51  | 7.77  | 2.16 | 5.26 |

<https://mc.manuscriptcentral.com/gut>

|    |       |      |      |      |       |      |       |      |      |
|----|-------|------|------|------|-------|------|-------|------|------|
| 1  | 8.17  | 7.15 | 0.79 | 0.79 | 8.8   | 8.96 | 8.08  | 2.79 | 3.79 |
| 2  | 11.1  | 5.91 | 1.1  | 1.1  | 10.46 | 8.38 | 9.2   | 2.68 | 6.8  |
| 3  | 10.34 | 5.94 | 3.17 | 0.59 | 9.43  | 7.26 | 9.06  | 1.59 | 5.34 |
| 4  | 10.85 | 6.35 | 0.49 | 2.07 | 9.44  | 6.9  | 9.03  | 3.07 | 4.74 |
| 5  | 7.11  | 2.55 | 4.14 | 1.55 | 8.93  | 8.39 | 9.5   | 3.14 | 5.8  |
| 6  | 7.97  | 7.35 | 1.57 | 0.57 | 10.57 | 3.89 | 8.17  | 2.57 | 4.52 |
| 7  | 7.93  | 7.41 | 1.65 | 0    | 9.7   | 3.93 | 8.27  | 0.65 | 5.13 |
| 8  | 7.94  | 7.32 | 1.67 | 0.94 | 9.75  | 3.74 | 8.46  | 2.35 | 5.73 |
| 9  | 7.2   | 0.27 | 5.4  | 1.27 | 8.58  | 7.7  | 8.41  | 1.27 | 6.63 |
| 10 | 7.58  | 6.08 | 4.69 | 1.96 | 9.21  | 8.33 | 8.1   | 0    | 6.19 |
| 11 | 8.59  | 7.57 | 2.46 | 1.24 | 10.19 | 8.68 | 8.74  | 1.97 | 7.12 |
| 12 | 8.49  | 7.36 | 1.89 | 1.89 | 10.22 | 8.94 | 8.86  | 0.89 | 7.1  |
| 13 | 8.51  | 7.67 | 1.3  | 2.62 | 9.68  | 8.42 | 8.97  | 3.47 | 6.47 |
| 14 | 8.09  | 7.63 | 2.45 | 2.13 | 8.9   | 8.09 | 7.93  | 2.71 | 6.7  |
| 15 | 9.22  | 6    | 3.54 | 2.54 | 9.08  | 11.7 | 12.02 | 4.54 | 6    |
| 16 | 8.98  | 6.96 | 3.12 | 0.8  | 9.95  | 7.35 | 8.25  | 2.12 | 5.95 |
| 17 | 8.5   | 6.77 | 3.82 | 0    | 8.88  | 7.27 | 7.28  | 1.56 | 5.96 |
| 18 | 9.03  | 7    | 3.56 | 0    | 9.95  | 7.63 | 8.59  | 0    | 5.78 |
| 19 |       |      |      |      |       |      |       |      |      |
| 20 |       |      |      |      |       |      |       |      |      |
| 21 |       |      |      |      |       |      |       |      |      |
| 22 |       |      |      |      |       |      |       |      |      |
| 23 |       |      |      |      |       |      |       |      |      |
| 24 |       |      |      |      |       |      |       |      |      |
| 25 |       |      |      |      |       |      |       |      |      |
| 26 |       |      |      |      |       |      |       |      |      |
| 27 |       |      |      |      |       |      |       |      |      |
| 28 |       |      |      |      |       |      |       |      |      |
| 29 |       |      |      |      |       |      |       |      |      |
| 30 |       |      |      |      |       |      |       |      |      |
| 31 |       |      |      |      |       |      |       |      |      |
| 32 |       |      |      |      |       |      |       |      |      |
| 33 |       |      |      |      |       |      |       |      |      |
| 34 |       |      |      |      |       |      |       |      |      |
| 35 |       |      |      |      |       |      |       |      |      |
| 36 |       |      |      |      |       |      |       |      |      |
| 37 |       |      |      |      |       |      |       |      |      |
| 38 |       |      |      |      |       |      |       |      |      |
| 39 |       |      |      |      |       |      |       |      |      |
| 40 |       |      |      |      |       |      |       |      |      |
| 41 |       |      |      |      |       |      |       |      |      |
| 42 |       |      |      |      |       |      |       |      |      |
| 43 |       |      |      |      |       |      |       |      |      |
| 44 |       |      |      |      |       |      |       |      |      |
| 45 |       |      |      |      |       |      |       |      |      |
| 46 |       |      |      |      |       |      |       |      |      |
| 47 |       |      |      |      |       |      |       |      |      |
| 48 |       |      |      |      |       |      |       |      |      |
| 49 |       |      |      |      |       |      |       |      |      |
| 50 |       |      |      |      |       |      |       |      |      |
| 51 |       |      |      |      |       |      |       |      |      |
| 52 |       |      |      |      |       |      |       |      |      |
| 53 |       |      |      |      |       |      |       |      |      |
| 54 |       |      |      |      |       |      |       |      |      |
| 55 |       |      |      |      |       |      |       |      |      |
| 56 |       |      |      |      |       |      |       |      |      |
| 57 |       |      |      |      |       |      |       |      |      |
| 58 |       |      |      |      |       |      |       |      |      |
| 59 |       |      |      |      |       |      |       |      |      |
| 60 |       |      |      |      |       |      |       |      |      |

1  
2  
3  
4  
5  
6  
7  
8  
9  
10  
11  
12  
13  
14  
15  
16  
17  
18  
19  
20  
21  
22  
23  
24  
25  
26  
27  
28  
29  
30  
31  
32  
33  
34  
35  
36  
37  
38  
39  
40  
41  
42  
43  
44  
45  
46  
47  
48  
49  
50  
51  
52  
53  
54  
55  
56  
57  
58  
59  
60

| LAMA4 | LAMA5 | LAMB3 | LAMC1 | LAMC2 | LDHA  | LEFTY1 | LGALS1 | LHFP |
|-------|-------|-------|-------|-------|-------|--------|--------|------|
| 8.59  | 8.35  | 7.87  | 8.09  | 8.11  | 10.46 | 5.88   | 9.46   | 8.23 |
| 9.59  | 8.94  | 9.41  | 8.98  | 8.91  | 11.25 | 6.08   | 10.6   | 8.04 |
| 9.47  | 8.72  | 8.95  | 8.7   | 8.75  | 11.24 | 6.08   | 10.42  | 7.78 |
| 10.83 | 9.69  | 9.1   | 9.68  | 8.66  | 11.16 | 3.64   | 11.62  | 8.87 |
| 8.91  | 9.41  | 4.01  | 7.29  | 7.56  | 10.57 | 7.7    | 4.01   | 8.78 |
| 9.11  | 9.4   | 8.46  | 8.66  | 9.13  | 10.91 | 5.64   | 10.55  | 7.71 |
| 9.24  | 9.25  | 8.84  | 8.84  | 9.28  | 10.93 | 5.8    | 10.67  | 7.74 |
| 10.81 | 10.94 | 9.33  | 9.16  | 10.16 | 11.07 | 3.39   | 11.77  | 8.25 |
| 9.87  | 8.75  | 7.41  | 8.7   | 5.22  | 10.85 | 5.01   | 11.55  | 8.35 |
| 9.18  | 8.71  | 8.75  | 8.88  | 9.41  | 11.48 | 5.91   | 10.37  | 7.19 |
| 9.35  | 8.17  | 8.89  | 9.08  | 9.56  | 11.76 | 4.63   | 10.85  | 6.74 |
| 9.81  | 9.1   | 9.07  | 9.58  | 10.59 | 11.82 | 1.68   | 11.65  | 7.91 |
| 8.94  | 8.97  | 7.61  | 8.18  | 7.21  | 11.26 | 5.95   | 9.74   | 7.55 |
| 9.61  | 9.19  | 7.4   | 9.16  | 7.21  | 11.45 | 6.37   | 11.09  | 8.08 |
| 11.28 | 10.78 | 6.81  | 9.24  | 6.47  | 9.73  | 1.77   | 11.84  | 9.31 |
| 9.44  | 8.95  | 8.79  | 8.66  | 9.34  | 11.37 | 5.75   | 10.85  | 8.54 |
| 9.54  | 9.88  | 9.17  | 8.86  | 9.7   | 11.27 | 6.24   | 11.02  | 7.89 |
| 10.38 | 9.96  | 8.83  | 9.09  | 9.39  | 11.89 | 6.52   | 11.7   | 8.35 |
| 10.78 | 9.76  | 7.43  | 8.96  | 8.08  | 10.31 | 1.48   | 10.7   | 8.87 |
| 9.74  | 9.24  | 8.44  | 9.35  | 7.65  | 11.43 | 1.31   | 11.13  | 7.87 |
| 10.14 | 9.56  | 7.41  | 9.55  | 6.87  | 11.02 | 1.08   | 11.14  | 8.66 |
| 10.84 | 10.57 | 10.01 | 10.29 | 9.33  | 11.79 | 10.31  | 11.88  | 8.27 |
| 10.35 | 10.69 | 10.46 | 10.23 | 9.38  | 11.59 | 10.69  | 11.34  | 8.28 |
| 10.26 | 10.38 | 10.37 | 10.21 | 9.56  | 11.84 | 8.67   | 11.94  | 8.36 |
| 7.97  | 10    | 5.28  | 8.93  | 3.43  | 11.6  | 4.13   | 10.45  | 6.04 |
| 8.66  | 10.15 | 8.96  | 8.2   | 7.7   | 12.47 | 4.13   | 10.37  | 7    |
| 8.58  | 10.34 | 9.14  | 8.19  | 7.79  | 12.17 | 4.77   | 10.15  | 7.09 |
| 8.79  | 10.23 | 8.59  | 8.23  | 7.7   | 11.2  | 6.85   | 10.02  | 7.51 |
| 8.44  | 8.78  | 8.85  | 7.94  | 7.93  | 11.35 | 5.83   | 9.07   | 7.59 |
| 9.19  | 9.16  | 8.16  | 8.5   | 8.74  | 11.25 | 5.88   | 10.01  | 7.78 |
| 8.9   | 9.1   | 9.04  | 8.65  | 8.63  | 11.42 | 5.9    | 9.96   | 7.37 |
| 9.37  | 9.33  | 8.15  | 8.33  | 8.61  | 10.64 | 6.44   | 9.57   | 8.44 |
| 8.62  | 8.33  | 3.74  | 7.65  | 6.13  | 10.13 | 5.92   | 9.03   | 8.55 |
| 10.42 | 10.13 | 7.77  | 10.12 | 7.2   | 11.03 | 2.06   | 12.21  | 8.52 |
| 10.09 | 10.01 | 8.65  | 10.03 | 7.78  | 11.27 | 1.93   | 11.57  | 7.75 |
| 10.56 | 10.16 | 7.92  | 9.91  | 6.88  | 10.51 | 2.06   | 11.89  | 8.68 |
| 8.83  | 8.39  | 7.65  | 7.48  | 8.32  | 10.56 | 8.53   | 10.2   | 7.71 |
| 8.24  | 8.34  | 9.37  | 7.9   | 8.27  | 11.37 | 5.47   | 10.68  | 6.24 |
| 8.97  | 8.43  | 8.67  | 8.01  | 6.76  | 11.18 | 4.27   | 10.8   | 6.91 |
| 8.69  | 8.09  | 8.01  | 7.94  | 6.85  | 10.57 | 4.99   | 10.39  | 6.93 |
| 8.77  | 8.91  | 6.52  | 7.94  | 6.95  | 10.28 | 5.83   | 9.8    | 8.01 |
| 8.64  | 9.02  | 6.74  | 8.16  | 6.68  | 10.67 | 5.6    | 9.97   | 7.69 |
| 8.25  | 9.04  | 6.68  | 8.04  | 6.64  | 10.26 | 6.05   | 9.44   | 7.71 |
| 8.5   | 9.33  | 7.01  | 8.38  | 6.46  | 10.63 | 5.54   | 9.99   | 7.22 |
| 10.24 | 11.31 | 6.56  | 8.03  | 6.32  | 9.27  | 2.86   | 9.94   | 7.56 |
| 8.81  | 8.62  | 7.84  | 8.87  | 6.04  | 10.74 | 4.71   | 10.16  | 6.76 |
| 9.35  | 8.92  | 8.2   | 9.21  | 6.89  | 11.06 | 4.86   | 10.71  | 7.99 |
| 9.81  | 8.81  | 7.43  | 9.43  | 6.51  | 10.76 | 3.39   | 11.43  | 8.96 |
| 9.62  | 9.45  | 8.23  | 9.34  | 7.87  | 12.46 | 2.63   | 11.45  | 8.65 |
| 9.86  | 9.53  | 9.03  | 9.86  | 8.79  | 12.7  | 2.01   | 12.18  | 7.76 |
| 9.18  | 10.14 | 8.55  | 9.35  | 8.06  | 12.65 | 1.5    | 11.29  | 6.99 |

<https://mc.manuscriptcentral.com/gut>

1  
2  
3  
4  
5  
6  
7  
8  
9  
10  
11  
12  
13  
14  
15  
16  
17  
18  
19  
20  
21  
22  
23  
24  
25  
26  
27  
28  
29  
30  
31  
32  
33  
34  
35  
36  
37  
38  
39  
40  
41  
42  
43  
44  
45  
46  
47  
48  
49  
50  
51  
52  
53  
54  
55  
56  
57  
58  
59  
60

|       |       |       |       |       |       |      |       |      |
|-------|-------|-------|-------|-------|-------|------|-------|------|
| 9.89  | 9.76  | 9.02  | 9.54  | 8.78  | 12.64 | 3.08 | 12.12 | 8.08 |
| 8.7   | 9.67  | 8.44  | 8.9   | 7.75  | 11.64 | 6.14 | 9.47  | 8.5  |
| 9.47  | 9.2   | 8.13  | 9.15  | 7.21  | 11.3  | 5.71 | 10.4  | 8.03 |
| 9.19  | 9.06  | 8.32  | 9.37  | 7.35  | 11.6  | 5.65 | 10.28 | 8.24 |
| 9.26  | 8.95  | 8.15  | 8.92  | 7.3   | 11.22 | 5.64 | 10.34 | 8    |
| 8.93  | 9.08  | 7.69  | 8.5   | 9.22  | 11.7  | 4.23 | 10.59 | 8.63 |
| 9.18  | 9.47  | 8.69  | 9.11  | 9.67  | 12.1  | 2.57 | 11.09 | 7.8  |
| 8.58  | 8.85  | 8.28  | 8.54  | 8.57  | 12.31 | 1.81 | 10.39 | 6.8  |
| 9.67  | 9.86  | 8.1   | 9.22  | 9.08  | 12.03 | 1.44 | 11.34 | 8.44 |
| 8     | 8.22  | 6.65  | 8.47  | 4.54  | 13.05 | 0    | 10.41 | 7.08 |
| 8.71  | 9.55  | 8.82  | 8.78  | 6.69  | 11.67 | 2.13 | 10.66 | 6.83 |
| 8.33  | 9.42  | 8.58  | 8.74  | 6.08  | 12    | 2.14 | 10.51 | 6.73 |
| 8.87  | 9.17  | 8.42  | 8.79  | 5.37  | 11.85 | 1.56 | 10.69 | 7.19 |
| 11.93 | 12.41 | 5.15  | 8.15  | 10.93 | 10.96 | 5.15 | 8.85  | 7.15 |
| 10.72 | 9.96  | 7.94  | 8.52  | 9.83  | 11.51 | 6.07 | 11.13 | 8.07 |
| 9.47  | 8.93  | 8.07  | 8.31  | 9.58  | 11.36 | 6.62 | 10.59 | 8.19 |
| 10.39 | 10.24 | 4.77  | 8.91  | 8.39  | 11.66 | 8.08 | 1.83  | 9.73 |
| 10.55 | 10.82 | 3.77  | 8.09  | 8.62  | 11.23 | 8    | 5.36  | 9.15 |
| 8.55  | 9.56  | 8.75  | 8.59  | 9.57  | 12.01 | 5.46 | 9.69  | 6.75 |
| 8.07  | 9.41  | 9.51  | 8.36  | 10.34 | 12.18 | 5.97 | 9.25  | 6.73 |
| 8.79  | 9.41  | 8.46  | 8.21  | 9.29  | 11.47 | 6.12 | 9.53  | 7.2  |
| 9.46  | 10.5  | 9.7   | 9.29  | 8.65  | 12.16 | 2.8  | 10.68 | 9.09 |
| 9.26  | 10.3  | 9.61  | 9.15  | 8.86  | 11.86 | 4.8  | 10.18 | 8.81 |
| 9.05  | 9.55  | 8.77  | 9.09  | 7.86  | 11.81 | 6.48 | 9.42  | 9.32 |
| 9.35  | 9.92  | 9.72  | 9.66  | 9.5   | 12.27 | 4.81 | 11.56 | 7.6  |
| 9.84  | 10.44 | 9.87  | 9.97  | 9.96  | 12.58 | 7.31 | 12.28 | 8.1  |
| 10.08 | 10.46 | 9.31  | 10.02 | 9.71  | 12.75 | 5.15 | 12.68 | 7.93 |
| 8.77  | 9.51  | 7.83  | 8.98  | 7.41  | 12.24 | 6.91 | 10.62 | 7.36 |
| 9.17  | 9.88  | 7.92  | 9.18  | 7.18  | 12.72 | 6.64 | 10.81 | 7.26 |
| 9.07  | 9.78  | 7.62  | 9.01  | 7.12  | 12.29 | 6.63 | 10.49 | 7.65 |
| 9.23  | 9.22  | 8.74  | 9.01  | 8.71  | 11.57 | 6.64 | 10.17 | 9.42 |
| 9.52  | 9.72  | 8.8   | 9.08  | 8.73  | 11.83 | 6.57 | 10.24 | 8.36 |
| 9.57  | 9.52  | 8.7   | 8.64  | 8.96  | 11.63 | 6.98 | 9.87  | 8.44 |
| 9.64  | 9.47  | 10.04 | 9.63  | 11.07 | 11.77 | 6.52 | 11.42 | 8.08 |
| 9.49  | 9.36  | 9.91  | 9.52  | 10.85 | 11.65 | 6.42 | 11.13 | 7.92 |
| 9.97  | 9.49  | 9.92  | 9.91  | 10.99 | 11.92 | 6.26 | 11.79 | 8.27 |
| 9.34  | 8.79  | 8.13  | 8.52  | 9.46  | 10.87 | 6.61 | 10.21 | 8.84 |
| 9.34  | 8.79  | 8.13  | 8.52  | 9.46  | 10.87 | 6.61 | 10.21 | 8.84 |
| 9.39  | 10.28 | 8.34  | 8.59  | 9.02  | 11.27 | 6.49 | 10.18 | 8.56 |
| 9.73  | 9.84  | 8.74  | 9.09  | 9.43  | 11.33 | 6.85 | 10.84 | 8.49 |
| 9.72  | 9.96  | 8.56  | 9.16  | 9.66  | 11.5  | 6.53 | 11.28 | 9.05 |
| 8.48  | 8.49  | 6.56  | 7.7   | 7.57  | 10.5  | 7.06 | 8.32  | 8.2  |
| 9.64  | 9.93  | 8.67  | 9.86  | 8.1   | 11.02 | 6.69 | 10.69 | 8.13 |
| 9.17  | 10.01 | 9.22  | 9.66  | 8.1   | 11.75 | 6.34 | 10.34 | 7.91 |
| 9.69  | 9.74  | 7.49  | 9.24  | 7.79  | 10.87 | 6.92 | 10.36 | 8.47 |
| 10.2  | 9.62  | 8.18  | 9.02  | 8.03  | 11.4  | 6.73 | 11.39 | 8.11 |
| 9.78  | 9.92  | 8.9   | 8.82  | 8.57  | 11.8  | 5.32 | 10.74 | 7.01 |
| 11.03 | 10.05 | 7.85  | 8.87  | 7.64  | 11.02 | 5.69 | 11.86 | 8.07 |
| 8.62  | 8.31  | 6.65  | 7.56  | 7.94  | 10.55 | 6.81 | 8.64  | 8.51 |
| 10.14 | 9.24  | 7.15  | 9.01  | 8.09  | 10.9  | 6.77 | 11.05 | 8.77 |
| 9.98  | 9.48  | 7.39  | 8.61  | 7.96  | 10.94 | 6.85 | 10.64 | 8.9  |
| 8.96  | 9.17  | 7.17  | 8.61  | 7.4   | 10.67 | 7.99 | 9.71  | 7.74 |

<https://mc.manuscriptcentral.com/gut>

|    |       |       |       |      |       |       |       |       |      |
|----|-------|-------|-------|------|-------|-------|-------|-------|------|
| 1  |       |       |       |      |       |       |       |       |      |
| 2  | 9.18  | 9.23  | 8.13  | 9.05 | 8.34  | 10.92 | 7.64  | 10.47 | 7.6  |
| 3  | 10.39 | 9.37  | 6.25  | 8.47 | 7.98  | 10.53 | 7.32  | 10.53 | 8.55 |
| 4  | 8.96  | 9.59  | 7.85  | 8.27 | 7.59  | 10.41 | 8.71  | 9.58  | 8.83 |
| 5  | 9.94  | 10.94 | 9.28  | 9.65 | 9.7   | 12    | 6.83  | 11.77 | 8.6  |
| 6  | 10.67 | 11.21 | 8.12  | 9.98 | 7.65  | 11.36 | 7.43  | 12.23 | 9.32 |
| 7  | 10.2  | 8.73  | 8.84  | 9.03 | 10.11 | 11.57 | 10.27 | 11.23 | 9.28 |
| 8  | 9.24  | 8.77  | 10.26 | 8.93 | 10.56 | 12.83 | 3.72  | 11.27 | 6.89 |
| 9  | 9.46  | 8.72  | 10.14 | 9.35 | 10.89 | 12.81 | 3.93  | 11.56 | 7.17 |
| 10 | 12.66 | 11.39 | 8.52  | 9.33 | 10.08 | 11.19 | 6.2   | 12.55 | 8.83 |
| 11 | 9.76  | 9.21  | 8.43  | 9.03 | 7.8   | 9.73  | 10    | 11.08 | 8.53 |
| 12 | 9.17  | 9.45  | 9.47  | 9.4  | 8.1   | 10.75 | 10.96 | 10.6  | 6.51 |
| 13 | 8.05  | 8.57  | 8.68  | 8.37 | 7.91  | 10.89 | 10.41 | 9.5   | 7    |
| 14 | 12.61 | 11.1  | 8.58  | 9.4  | 8.47  | 10.05 | 10.72 | 12.5  | 8.99 |
| 15 | 9.28  | 9.64  | 3.9   | 7.83 | 8.28  | 10.59 | 8.84  | 1.52  | 9.88 |
| 16 | 9.12  | 8.88  | 8.68  | 8.37 | 7.77  | 11.2  | 4.85  | 10.91 | 6.99 |
| 17 | 8.73  | 8.71  | 8.82  | 8.42 | 7.89  | 11.25 | 3.54  | 10.49 | 6.71 |
| 18 | 8.84  | 9.07  | 8.71  | 8.3  | 7.92  | 11.09 | 5.89  | 10.52 | 6.9  |
| 19 | 9.14  | 9.66  | 10.41 | 8.23 | 11.31 | 12.28 | 1.76  | 11.42 | 6.6  |
| 20 | 9.21  | 9.11  | 9.42  | 7.96 | 10.74 | 11.85 | 5.58  | 11.14 | 7.66 |
| 21 | 9.31  | 9.51  | 10.06 | 8.18 | 11.07 | 12.27 | 4.68  | 11.36 | 7.55 |
| 22 | 13.85 | 12.91 | 5.16  | 5.16 | 8.62  | 7.16  | 5.16  | 10.21 | 7.49 |
| 23 | 8.48  | 9.19  | 9.66  | 9.24 | 7.97  | 12.23 | 2.3   | 10.06 | 6.48 |
| 24 | 8.94  | 9.43  | 9.01  | 9.16 | 8.02  | 11.52 | 1.54  | 10.57 | 7.09 |
| 25 | 10.48 | 11.63 | 9.12  | 10   | 7.87  | 10.92 | 9.25  | 11.07 | 8.47 |
| 26 | 11.54 | 11.66 | 8.8   | 9.83 | 7.76  | 10.53 | 5.95  | 11.48 | 8.83 |
| 27 | 10.57 | 10.69 | 8.78  | 9.84 | 8.37  | 11.26 | 5.07  | 11.91 | 9.5  |
| 28 | 9.34  | 9.21  | 5     | 6.97 | 7.44  | 10    | 7.71  | 7.76  | 8.38 |
| 29 | 8.9   | 8.83  | 4.03  | 6.72 | 7.43  | 10.19 | 7.7   | 3.67  | 8.26 |
| 30 | 8.26  | 8.09  | 2.77  | 6.47 | 7.55  | 9.92  | 7.55  | 3.35  | 8.41 |
| 31 | 8.49  | 7.96  | 7.7   | 8.25 | 7.59  | 10.07 | 5.18  | 10.21 | 9.04 |
| 32 | 10.08 | 8.61  | 6.39  | 9.31 | 6.11  | 10.61 | 1.59  | 11.75 | 8.61 |
| 33 | 9.62  | 8.92  | 7.25  | 8.67 | 6.02  | 10.31 | 4.69  | 10.75 | 8.38 |
| 34 | 9.75  | 8.25  | 5.74  | 8.88 | 5.2   | 10.72 | 2.16  | 11.05 | 9.62 |
| 35 | 8.54  | 8.27  | 3.62  | 5.81 | 6.26  | 9.42  | 6.47  | 6.52  | 7.75 |
| 36 | 7.82  | 7.98  | 5.11  | 6.03 | 6.74  | 9.48  | 6.48  | 6.4   | 7.69 |
| 37 | 8.15  | 8.61  | 5.72  | 5.9  | 6.86  | 9.43  | 6.04  | 7.26  | 7.21 |
| 38 | 8.43  | 8.81  | 2.32  | 6.99 | 6.72  | 10.49 | 6.89  | 0     | 8.39 |
| 39 | 8.28  | 8.02  | 3.34  | 5.73 | 6.51  | 9.53  | 6.51  | 5.14  | 7.36 |
| 40 | 8.39  | 7.12  | 3.42  | 6.1  | 6.59  | 9.59  | 6.74  | 6.49  | 7.33 |
| 41 | 8.4   | 7.5   | 4.01  | 6.5  | 6.58  | 9.48  | 6.74  | 7.02  | 7.09 |
| 42 | 8.92  | 9.57  | 2.41  | 7.73 | 7.84  | 11.28 | 5.87  | 5     | 7.58 |
| 43 | 9.09  | 9.04  | 4.51  | 7.3  | 7.66  | 10.04 | 7.48  | 6.23  | 8.49 |
| 44 | 8.76  | 9.21  | 2.91  | 6.86 | 7.62  | 10.5  | 8.16  | 0.33  | 8.57 |
| 45 | 9.3   | 9.18  | 7.22  | 7.24 | 8.57  | 9.85  | 7.02  | 8.45  | 7.71 |
| 46 | 8.94  | 8.9   | 4.88  | 7.09 | 7.59  | 10.06 | 7.56  | 6.39  | 8.23 |
| 47 | 9.2   | 9.13  | 6.81  | 7.52 | 8.14  | 10.12 | 7.57  | 8.83  | 8.58 |
| 48 | 9.43  | 9.3   | 4.94  | 7.49 | 7.92  | 10.28 | 8.22  | 7.94  | 8.45 |
| 49 | 7.64  | 7.76  | 4.41  | 7.61 | 7.98  | 10.45 | 8.31  | 3.03  | 8.39 |
| 50 | 9.61  | 8.86  | 4.8   | 7.9  | 7.42  | 11.03 | 8.17  | 7.63  | 8.65 |
| 51 | 7.2   | 7.79  | 5.79  | 7.29 | 6.43  | 11.78 | 5.69  | 8.97  | 7.47 |
| 52 | 7.96  | 8.31  | 6.2   | 7.9  | 6.66  | 11.89 | 5.7   | 9.85  | 7.03 |
| 53 | 8.29  | 8.52  | 6.3   | 8.07 | 6.59  | 11.71 | 5.53  | 9.94  | 7.2  |

1  
2  
3  
4  
5  
6  
7  
8  
9  
10  
11  
12  
13  
14  
15  
16  
17  
18  
19  
20  
21  
22  
23  
24  
25  
26  
27  
28  
29  
30  
31  
32  
33  
34  
35  
36  
37  
38  
39  
40  
41  
42  
43  
44  
45  
46  
47  
48  
49  
50  
51  
52  
53  
54  
55  
56  
57  
58  
59  
60

|       |       |      |       |      |       |      |       |      |
|-------|-------|------|-------|------|-------|------|-------|------|
| 7.82  | 8.36  | 5.94 | 7.61  | 6.88 | 11.86 | 6.18 | 9.18  | 7.66 |
| 9.55  | 9.87  | 9.24 | 9.13  | 7.83 | 12.57 | 6.13 | 10.83 | 8.36 |
| 9.93  | 9.84  | 9.24 | 9.59  | 7.87 | 12.18 | 6.31 | 11.51 | 8.24 |
| 8.92  | 9.49  | 9.39 | 9.18  | 8.69 | 12.47 | 7.51 | 10.48 | 7.67 |
| 8.81  | 9.37  | 9.49 | 9.21  | 8.82 | 12.51 | 7.63 | 10.59 | 7.71 |
| 9.37  | 9.71  | 8.77 | 9.66  | 7.87 | 11.98 | 6.74 | 10.41 | 8.85 |
| 10.3  | 10.66 | 9.28 | 9.83  | 8.97 | 12.69 | 2.84 | 11.33 | 8.5  |
| 9.41  | 10.24 | 9.93 | 9.52  | 8.79 | 12.83 | 3.15 | 10.62 | 7.59 |
| 11.26 | 10.98 | 7.93 | 9.96  | 7.22 | 11.43 | 3.74 | 12.05 | 9.62 |
| 10.07 | 11.02 | 9.74 | 9.73  | 8.39 | 13    | 4.76 | 11.85 | 9.02 |
| 10.28 | 10.17 | 8.71 | 9.74  | 8.92 | 12.17 | 6.58 | 11.79 | 8.93 |
| 10.44 | 10.15 | 8.9  | 10.07 | 9.48 | 11.85 | 6.92 | 12.14 | 8.64 |
| 10.29 | 10.37 | 8.91 | 9.8   | 8.75 | 12.66 | 7.19 | 11.64 | 8.49 |
| 8.64  | 9.11  | 8.41 | 8.23  | 8.54 | 11.37 | 6.68 | 9.8   | 8.73 |
| 9.2   | 9.77  | 8.75 | 9.23  | 8.67 | 11.69 | 5.81 | 10.64 | 7.57 |
| 10.87 | 10.39 | 7.34 | 9.07  | 8.13 | 10.76 | 6.12 | 11.3  | 9.42 |
| 9.35  | 8.33  | 7.12 | 8.84  | 7.59 | 10.54 | 6.96 | 10.63 | 9.57 |
| 9.9   | 8.68  | 8.52 | 9.03  | 8.82 | 11.53 | 9.2  | 11.57 | 7.85 |
| 10.59 | 9.46  | 8.53 | 9.71  | 9.25 | 11.17 | 6.47 | 12.36 | 8.67 |
| 8.54  | 9.76  | 8.36 | 8.38  | 7.74 | 10.77 | 2.51 | 9.95  | 8.64 |
| 9.74  | 8.79  | 8.39 | 9.24  | 8.39 | 12.4  | 3    | 11.81 | 7.54 |
| 8.74  | 8.97  | 8.3  | 8.88  | 7.84 | 12.18 | 0.48 | 10.28 | 6.58 |
| 9.37  | 10.22 | 8.39 | 8.91  | 7.58 | 10.52 | 6.43 | 10.68 | 8.34 |
| 9.36  | 10.76 | 8.29 | 9.13  | 7.71 | 10.48 | 6.6  | 10.91 | 8.03 |
| 12.68 | 12.29 | 8.58 | 9.82  | 8.58 | 9.64  | 3.15 | 12.51 | 9.54 |
| 7.4   | 8.08  | 5.61 | 7.51  | 4.36 | 10.15 | 0.36 | 8.78  | 7.55 |
| 8.48  | 8.48  | 6.04 | 7.91  | 5.43 | 10.13 | 6.49 | 9.69  | 7.2  |
| 8.51  | 8.67  | 7.26 | 8.38  | 4.57 | 10.69 | 1.76 | 9.94  | 6.39 |
| 9.89  | 9.48  | 5.81 | 8.56  | 5.36 | 11.22 | 3.48 | 11.09 | 7.85 |
| 8.15  | 7.62  | 1.76 | 6.22  | 5.93 | 9.42  | 6.76 | 5.22  | 7.46 |
| 9.15  | 7.77  | 4.53 | 6.67  | 6.58 | 9.4   | 6.45 | 8.81  | 7.27 |
| 7.6   | 7.15  | 0.88 | 6.13  | 6.64 | 9.7   | 6.99 | 2.47  | 7.22 |
| 8.34  | 7.48  | 3.96 | 6.48  | 5.76 | 9.38  | 6.38 | 6     | 7.2  |
| 7.47  | 6.73  | 7.16 | 7.44  | 6.15 | 10.06 | 5.06 | 8.55  | 6.89 |
| 8.32  | 7.57  | 6.87 | 7.41  | 6.66 | 9.08  | 6.14 | 8.54  | 6.71 |
| 8.44  | 7.57  | 7.69 | 7.95  | 7.57 | 9.35  | 5.74 | 9.26  | 7.34 |
| 8.65  | 7.46  | 8.5  | 7.92  | 8.33 | 9.56  | 5.51 | 10.18 | 7.52 |
| 7.78  | 8.21  | 3.81 | 7.35  | 6.4  | 10.43 | 0.35 | 9.28  | 8.05 |
| 9.97  | 9.56  | 8.16 | 9.78  | 8.68 | 11.62 | 4.05 | 10.77 | 7.69 |
| 9.72  | 9.4   | 9.07 | 8.7   | 9.23 | 11.69 | 0.42 | 10.76 | 7.42 |
| 12.1  | 10.72 | 7.04 | 8.32  | 8.61 | 10.86 | 3.23 | 11.6  | 8.34 |
| 8.49  | 8.42  | 7.97 | 8.53  | 8.04 | 11.42 | 5.58 | 9.71  | 8.05 |
| 12.85 | 11.14 | 6.83 | 7.51  | 9.1  | 9.97  | 5.51 | 11.71 | 8.42 |
| 9.52  | 9.32  | 8.71 | 9.44  | 8.88 | 11.43 | 1.87 | 11.38 | 7.58 |
| 9.89  | 9.3   | 8.19 | 9.94  | 9.06 | 11.2  | 0.94 | 12.04 | 7.7  |
| 6.81  | 9.35  | 9.08 | 8.89  | 7.67 | 12.12 | 3.27 | 8.02  | 5.59 |
| 9.13  | 9.54  | 8.55 | 9.16  | 7.9  | 11.25 | 4.84 | 10.8  | 7.48 |
| 8.76  | 9.39  | 8.6  | 9.36  | 7.68 | 11.41 | 3.6  | 10.42 | 7    |
| 8.92  | 8.94  | 7.96 | 8.76  | 7.52 | 11.24 | 5.81 | 10.44 | 7.43 |
| 8.49  | 7.97  | 6.13 | 8.29  | 6.37 | 11.34 | 0    | 10.06 | 8.96 |
| 8.4   | 8.16  | 6.62 | 8.69  | 6.23 | 10.82 | 4.85 | 10.14 | 7.88 |
| 8.49  | 8.17  | 6.17 | 8.11  | 6.4  | 10.52 | 5.23 | 9.68  | 7.62 |

<https://mc.manuscriptcentral.com/gut>

1  
2  
3  
4  
5  
6  
7  
8  
9  
10  
11  
12  
13  
14  
15  
16  
17  
18  
19  
20  
21  
22  
23  
24  
25  
26  
27  
28  
29  
30  
31  
32  
33  
34  
35  
36  
37  
38  
39  
40  
41  
42  
43  
44  
45  
46  
47  
48  
49  
50  
51  
52  
53  
54  
55  
56  
57  
58  
59  
60

|       |       |      |       |      |       |      |       |      |
|-------|-------|------|-------|------|-------|------|-------|------|
| 9.96  | 9.49  | 6.25 | 9.29  | 6.49 | 10.18 | 0.79 | 11.14 | 8.36 |
| 9.29  | 9.25  | 6.91 | 8.48  | 7.19 | 9.64  | 3.68 | 10.54 | 9.28 |
| 8.77  | 9.52  | 7.38 | 8.53  | 6.29 | 10.6  | 4.67 | 9.95  | 6.42 |
| 9.05  | 9.79  | 7.5  | 8.75  | 6.07 | 10.33 | 4.07 | 10.14 | 6.04 |
| 10.46 | 9.77  | 2.55 | 6.64  | 7.05 | 8.98  | 6.68 | 8.99  | 7.88 |
| 8.17  | 7.84  | 6.9  | 7.76  | 6.07 | 11.99 | 1.89 | 10.08 | 7.26 |
| 7.07  | 8.05  | 7.08 | 6.96  | 6.06 | 11.51 | 0.65 | 8.77  | 5.51 |
| 6.93  | 8.1   | 7.02 | 7.17  | 6.13 | 11.5  | 1.67 | 8.79  | 5.24 |
| 8.09  | 8.23  | 1.86 | 6.05  | 6.54 | 9.8   | 7.09 | 1.86  | 7.78 |
| 8.86  | 7.93  | 6.09 | 7.7   | 7.62 | 9.82  | 6.28 | 9.33  | 7.58 |
| 8.77  | 7.8   | 7.79 | 8.39  | 7.97 | 10.64 | 1.24 | 10.02 | 9.17 |
| 9.16  | 8.13  | 7.46 | 8.6   | 7.77 | 10.81 | 5.47 | 10.65 | 7.7  |
| 9.78  | 8.22  | 7.03 | 8.84  | 6.73 | 10.52 | 3.76 | 10.81 | 8.38 |
| 9.26  | 7.87  | 6.17 | 8.84  | 6.71 | 10.68 | 4.3  | 10.79 | 9.63 |
| 11.96 | 10.01 | 7.45 | 6.71  | 6.87 | 8.4   | 6    | 11.26 | 8.04 |
| 8.19  | 9.15  | 7.27 | 10.39 | 8.11 | 10.25 | 4.89 | 9.85  | 6.44 |
| 7.98  | 7.78  | 6.69 | 8.95  | 6.16 | 10.38 | 5.48 | 9.49  | 6.66 |
| 8.49  | 9.45  | 7.41 | 10.42 | 7.9  | 10.08 | 4    | 9.94  | 6.45 |

1  
2  
3  
4  
5  
6  
7  
8  
9  
10  
11  
12  
13  
14  
15  
16  
17  
18  
19  
20  
21  
22  
23  
24  
25  
26  
27  
28  
29  
30  
31  
32  
33  
34  
35  
36  
37  
38  
39  
40  
41  
42  
43  
44  
45  
46  
47  
48  
49  
50  
51  
52  
53  
54  
55  
56  
57  
58  
59  
60

| LIFR | LLGL2 | LOX  | LOXL2 | LRG1  | LTBP4 | LUM   | LY96 | MAF   |
|------|-------|------|-------|-------|-------|-------|------|-------|
| 7.49 | 8.09  | 6.48 | 6.49  | 8.46  | 8.68  | 11.27 | 6.61 | 8.42  |
| 6.8  | 8.64  | 6.31 | 6.41  | 8.41  | 9.27  | 10.83 | 6.18 | 8.64  |
| 7.03 | 8.44  | 6.64 | 6.37  | 8.16  | 9.32  | 10.87 | 5.89 | 8.89  |
| 7.2  | 9     | 7.38 | 6.2   | 8.24  | 10.73 | 12.04 | 7.27 | 9.71  |
| 7.52 | 7.96  | 1.01 | 7.99  | 8.31  | 8.29  | 9.2   | 1.01 | 7.93  |
| 6.71 | 8.71  | 7.39 | 6.64  | 7.23  | 9.17  | 12.18 | 6.31 | 8.29  |
| 6.63 | 9.01  | 7.1  | 6.59  | 7.21  | 9.01  | 11.99 | 6.62 | 8.19  |
| 7.21 | 10.31 | 8.25 | 6.44  | 7.9   | 10.25 | 12.44 | 8.03 | 9.68  |
| 6.17 | 10.09 | 7.69 | 5.37  | 7.42  | 9.31  | 12.01 | 8    | 9.06  |
| 6.52 | 10    | 7.18 | 5.55  | 7.7   | 8.56  | 11.52 | 6    | 7.52  |
| 6.33 | 10.09 | 7.12 | 4.63  | 7.57  | 9.22  | 11.71 | 6.42 | 8.03  |
| 6.79 | 10.21 | 8.04 | 5.64  | 7.72  | 9.55  | 12.33 | 7.17 | 8.7   |
| 5.74 | 9.07  | 6.28 | 6.07  | 7.1   | 9.38  | 11.74 | 5.64 | 7.46  |
| 5.88 | 8.78  | 7.53 | 6.86  | 7.3   | 9.11  | 13.17 | 6.82 | 8.34  |
| 7.63 | 10.11 | 6.52 | 6.41  | 8.64  | 10.97 | 12.21 | 8.98 | 10.49 |
| 7.75 | 9.06  | 7.57 | 6.53  | 7.94  | 8.77  | 11.82 | 7.35 | 8.7   |
| 6.68 | 9.75  | 7.57 | 6.15  | 7.83  | 9.75  | 12.33 | 6.46 | 8.4   |
| 6.85 | 10.05 | 8.72 | 7.52  | 7.98  | 9.44  | 12.24 | 6.91 | 9.02  |
| 7.75 | 10.42 | 7.14 | 5.76  | 7.8   | 10.7  | 11.79 | 7.83 | 10.24 |
| 5.75 | 9.97  | 7.3  | 5.59  | 8.73  | 9.75  | 11.96 | 7.29 | 9.03  |
| 6.74 | 9.56  | 7.36 | 5.69  | 7.84  | 9.78  | 11.98 | 7.56 | 9.75  |
| 7.25 | 9.78  | 8.08 | 6.21  | 7.76  | 10.85 | 12.84 | 6.49 | 8.67  |
| 7.69 | 9.71  | 7.34 | 6.18  | 7.54  | 11.02 | 12.88 | 6.24 | 8.77  |
| 7.52 | 9.48  | 7.87 | 6.42  | 7.7   | 10.69 | 13.01 | 6.52 | 8.89  |
| 7.93 | 8.4   | 5.98 | 4.23  | 6.78  | 8.62  | 10.13 | 6.4  | 7.65  |
| 7.07 | 10.25 | 5.59 | 4.59  | 10.17 | 9.1   | 9.95  | 6.71 | 7.06  |
| 7.03 | 10.3  | 5.88 | 4.43  | 9.67  | 9.4   | 10.11 | 6.63 | 7.34  |
| 7.37 | 9.83  | 5.7  | 5.98  | 9.56  | 9.39  | 10.15 | 6.82 | 7.76  |
| 7.4  | 9.85  | 5.74 | 6.44  | 7.83  | 8.98  | 9.46  | 5.12 | 7.85  |
| 6.68 | 9.22  | 5.86 | 6.46  | 8.8   | 9.31  | 10.73 | 6.3  | 8.43  |
| 6.35 | 9.89  | 5.87 | 6.5   | 8.35  | 8.93  | 10.17 | 5.52 | 7.91  |
| 6.99 | 9.75  | 6.1  | 6.75  | 8.09  | 9.44  | 10.84 | 6.07 | 8.75  |
| 8.87 | 6.93  | 4.47 | 7.32  | 7.15  | 8.58  | 9.94  | 7.31 | 9.3   |
| 8.36 | 9.79  | 8.34 | 6.42  | 8.16  | 9.12  | 13.5  | 7.17 | 8.68  |
| 8.62 | 10.09 | 8.18 | 6.23  | 8.44  | 9.11  | 12.4  | 6.92 | 8.33  |
| 8.7  | 10.12 | 7.61 | 6.33  | 8.3   | 9.45  | 13.06 | 7.29 | 9.31  |
| 7.05 | 8.39  | 5.35 | 5.2   | 6.85  | 8.95  | 9.96  | 7.91 | 8.84  |
| 5.19 | 8.44  | 6.48 | 4.83  | 7.87  | 8.1   | 11.53 | 7.27 | 8.01  |
| 5.61 | 7.45  | 6.59 | 5.07  | 6.78  | 8.43  | 11.8  | 7.54 | 8.66  |
| 5.89 | 7.6   | 6.44 | 4.74  | 7.19  | 8.16  | 11.45 | 7.57 | 8.58  |
| 6.41 | 8.16  | 7.23 | 6.08  | 7.04  | 7.95  | 10.94 | 6.02 | 7.68  |
| 6.36 | 8.15  | 7.41 | 6.5   | 6.74  | 8.3   | 11.54 | 5.25 | 7.53  |
| 6.26 | 7.81  | 6.92 | 6.03  | 6.31  | 8.23  | 10.94 | 5.08 | 7.23  |
| 5.7  | 8.42  | 7.15 | 5.52  | 6.32  | 8.24  | 11.88 | 5.4  | 7.31  |
| 7.45 | 10.47 | 4.45 | 5.45  | 7.32  | 10.86 | 7.56  | 6.18 | 10.7  |
| 7.63 | 9.04  | 5.74 | 5.17  | 6.46  | 9.09  | 11.51 | 6.27 | 7.56  |
| 7.11 | 8.94  | 6.69 | 4.91  | 4.75  | 9.46  | 12.8  | 6.28 | 7.99  |
| 6.84 | 8.51  | 7.9  | 5.69  | 4.76  | 10    | 13.75 | 6.79 | 7.99  |
| 6.61 | 9.92  | 7.79 | 5.33  | 7.19  | 9.31  | 12.51 | 8.29 | 9.97  |
| 6.22 | 9.79  | 8.29 | 5.5   | 7.77  | 8.78  | 12.82 | 7.58 | 8.06  |
| 7.83 | 9.94  | 7.06 | 5.54  | 7.41  | 9.49  | 12.09 | 7.38 | 8.42  |

<https://mc.manuscriptcentral.com/gut>



1  
2  
3  
4  
5  
6  
7  
8  
9  
10  
11  
12  
13  
14  
15  
16  
17  
18  
19  
20  
21  
22  
23  
24  
25  
26  
27  
28  
29  
30  
31  
32  
33  
34  
35  
36  
37  
38  
39  
40  
41  
42  
43  
44  
45  
46  
47  
48  
49  
50  
51  
52  
53  
54  
55  
56  
57  
58  
59  
60

|      |       |      |      |      |       |       |      |       |
|------|-------|------|------|------|-------|-------|------|-------|
| 6.96 | 9.52  | 8.59 | 6.19 | 7.36 | 9.13  | 12.99 | 8.01 | 9.09  |
| 6.05 | 10.83 | 6.37 | 5.73 | 6.69 | 9.55  | 10.23 | 5.7  | 7.46  |
| 6.1  | 10.35 | 6.1  | 6.02 | 6.62 | 9.36  | 11.58 | 5.71 | 7.39  |
| 6.08 | 10.36 | 6.2  | 6.29 | 6.68 | 9.62  | 11.67 | 6.04 | 7.3   |
| 6.32 | 10.18 | 6.16 | 5.87 | 6.41 | 9.49  | 11.54 | 5.85 | 7.77  |
| 7.69 | 8.94  | 6.84 | 5.09 | 7.52 | 9.51  | 11.25 | 6.75 | 8.11  |
| 5.67 | 9.76  | 7.17 | 4.95 | 7.82 | 9.54  | 12.1  | 6.57 | 7.82  |
| 3.53 | 10.04 | 6    | 4.17 | 7.66 | 8.67  | 10.73 | 5.49 | 6.73  |
| 5.93 | 10.02 | 7.18 | 4.61 | 7.36 | 9.81  | 11.91 | 6.83 | 8.04  |
| 3.67 | 9.1   | 6.76 | 4.63 | 6.86 | 8.58  | 10.2  | 7.34 | 7.48  |
| 6.24 | 9.36  | 6.42 | 5.07 | 7.14 | 8.89  | 11.38 | 7.3  | 7.65  |
| 4.4  | 9.11  | 6.29 | 5.34 | 7.16 | 8.36  | 11.46 | 6.99 | 7.19  |
| 5.68 | 9.1   | 6.58 | 4.68 | 5.56 | 8.58  | 11.77 | 7.24 | 7.8   |
| 7.15 | 8.32  | 6.74 | 8.74 | 7.96 | 9.61  | 9.24  | 7.74 | 10.51 |
| 7.25 | 9.67  | 6.7  | 8.3  | 8.22 | 9.72  | 10.55 | 7.33 | 10.01 |
| 6.62 | 9.08  | 6.69 | 7.61 | 7.61 | 9.15  | 11.09 | 7.03 | 8.96  |
| 8.76 | 8.88  | 1.24 | 9.76 | 8.91 | 8.76  | 9.87  | 1.24 | 9.85  |
| 8.28 | 8.98  | 0.77 | 9.62 | 8.79 | 9.08  | 9.23  | 3.77 | 9.68  |
| 5.53 | 9.68  | 5.63 | 6.74 | 7.59 | 9.2   | 9.78  | 4.46 | 7.13  |
| 5.28 | 9.77  | 5.21 | 6.78 | 7.8  | 9.03  | 8.89  | 4.17 | 6.96  |
| 5.92 | 9.55  | 6.26 | 7.14 | 7.75 | 9.33  | 10.37 | 5.1  | 7.86  |
| 5.71 | 9.12  | 7.58 | 5.56 | 6.31 | 10.68 | 12.62 | 7.03 | 8.04  |
| 6.3  | 8.8   | 7.1  | 5.8  | 6.89 | 10.62 | 12.22 | 6.94 | 7.89  |
| 7.35 | 7.8   | 8.05 | 6.75 | 6.66 | 10.55 | 12.34 | 7.72 | 7.86  |
| 8.08 | 10.51 | 8.47 | 6.22 | 8.59 | 9.34  | 12.18 | 7.66 | 8.57  |
| 7.35 | 10.86 | 9.27 | 6.63 | 8.38 | 9.45  | 13.53 | 7.65 | 8.97  |
| 7.82 | 11    | 9.4  | 6.47 | 8.4  | 9.62  | 13.34 | 7.54 | 9.42  |
| 6.53 | 8.88  | 7.31 | 6.51 | 7.02 | 8.62  | 11.62 | 7.1  | 7.83  |
| 6.15 | 8.6   | 7.56 | 6.25 | 6.82 | 8.78  | 11.7  | 6.67 | 7.77  |
| 6.51 | 8.47  | 6.99 | 6.51 | 6.72 | 8.8   | 11.55 | 6.72 | 7.9   |
| 6.85 | 9.5   | 7.11 | 7.14 | 7.75 | 9.79  | 11.47 | 6.42 | 8.57  |
| 6.29 | 9.69  | 5.84 | 6.9  | 7.74 | 9.13  | 10.55 | 5.87 | 8.14  |
| 6.5  | 9.87  | 5.77 | 7.29 | 7.99 | 9.34  | 11    | 5.51 | 8.58  |
| 6.24 | 9.67  | 7.98 | 7.28 | 7.86 | 9.07  | 12.5  | 6.37 | 8.25  |
| 5.97 | 9.81  | 8.03 | 7.39 | 8.2  | 8.79  | 12.29 | 5.94 | 8.05  |
| 6.48 | 9.38  | 8.88 | 7.23 | 8.27 | 8.81  | 12.87 | 6.48 | 8.57  |
| 7.32 | 8.54  | 7.39 | 6.72 | 7.74 | 8.6   | 12.18 | 6.48 | 8.45  |
| 7.32 | 8.54  | 7.39 | 6.72 | 7.74 | 8.6   | 12.18 | 6.48 | 8.45  |
| 7.33 | 9.48  | 6.67 | 6.62 | 8.13 | 9.81  | 11.76 | 5.93 | 8.2   |
| 7.22 | 9.1   | 6.88 | 6.86 | 7.73 | 9.72  | 12.2  | 6.06 | 8.6   |
| 7.34 | 9.04  | 8.71 | 7.1  | 7.81 | 9.21  | 13.19 | 6.56 | 8.63  |
| 8.53 | 7.78  | 4.26 | 7.18 | 7.67 | 8.99  | 9.52  | 5.95 | 8.28  |
| 8.16 | 9.23  | 6.97 | 7.2  | 7.45 | 9.69  | 11.91 | 6.03 | 7.96  |
| 7.91 | 9.3   | 7.19 | 7.07 | 7.81 | 9.31  | 11.28 | 5.62 | 8.36  |
| 7.92 | 8.76  | 6.04 | 7.34 | 7.93 | 9.61  | 11.39 | 5.97 | 8.52  |
| 4.25 | 10.66 | 7.14 | 5.77 | 7.88 | 9.89  | 12.82 | 7.03 | 8.17  |
| 4.66 | 10.88 | 6.57 | 5.4  | 8.08 | 9.84  | 11.54 | 5.66 | 7.43  |
| 5.6  | 10.93 | 7.58 | 6.32 | 8.68 | 10.17 | 12.42 | 8.1  | 9.15  |
| 7.75 | 7.92  | 6.6  | 6.99 | 7.48 | 9.04  | 10.78 | 6.15 | 8.05  |
| 6.8  | 8.19  | 7.84 | 7.6  | 7.64 | 9.61  | 12.52 | 6.46 | 8.95  |
| 6.95 | 8.05  | 7.14 | 7.09 | 7.6  | 9.85  | 12.56 | 6.31 | 8.83  |
| 6.61 | 8.58  | 6.01 | 6.2  | 7.07 | 9.1   | 11.59 | 5.2  | 7.95  |

<https://mc.manuscriptcentral.com/gut>

|    |      |       |      |      |      |       |       |      |       |
|----|------|-------|------|------|------|-------|-------|------|-------|
| 1  |      |       |      |      |      |       |       |      |       |
| 2  | 6.49 | 8.79  | 7.09 | 6.41 | 7.15 | 8.97  | 12.05 | 5.56 | 7.96  |
| 3  | 7.36 | 8.87  | 6.1  | 7.86 | 7.59 | 9.39  | 11.27 | 5.1  | 9.03  |
| 4  | 9.28 | 8.46  | 6.26 | 6.37 | 6.55 | 10.12 | 11.33 | 7.03 | 8.93  |
| 5  | 8.86 | 9.15  | 7.59 | 6.42 | 7.88 | 9.93  | 12.95 | 7.16 | 9.31  |
| 6  | 9.01 | 9.25  | 8.71 | 6.04 | 6.32 | 10.56 | 13.68 | 7.52 | 9.38  |
| 7  | 7.11 | 9.07  | 6.75 | 5.41 | 8.43 | 8.97  | 12.28 | 8.45 | 9.36  |
| 8  | 5.45 | 9.44  | 8.02 | 6.02 | 8.14 | 8.68  | 12.53 | 6.29 | 7.92  |
| 9  | 5.22 | 9.16  | 8.17 | 5.51 | 7.71 | 8.61  | 12.53 | 6.61 | 8.07  |
| 10 | 6.82 | 10.52 | 6.66 | 7.74 | 9.21 | 10.77 | 12.01 | 8.58 | 11.1  |
| 11 | 7.18 | 10.47 | 6.46 | 5.7  | 6.98 | 10.18 | 11.15 | 7.45 | 9.02  |
| 12 | 5.74 | 10.59 | 5.92 | 4.74 | 7.06 | 9.38  | 11.02 | 6.04 | 7.78  |
| 13 | 6.69 | 9.66  | 5.59 | 6    | 7.12 | 8.71  | 10.63 | 4.8  | 7.03  |
| 14 | 6.65 | 11.62 | 7.07 | 7.35 | 7.82 | 11.34 | 12.36 | 8.12 | 10.85 |
| 15 | 7.06 | 8.87  | 0    | 8.49 | 8.44 | 9.85  | 9.25  | 1.52 | 8.36  |
| 16 | 4.03 | 9.85  | 7.32 | 5.37 | 6.78 | 10.07 | 11.9  | 5.83 | 7.02  |
| 17 | 3.42 | 9.94  | 6.56 | 4.36 | 6.83 | 10.02 | 11.59 | 5.39 | 6.51  |
| 18 | 3.84 | 9.96  | 6.67 | 5.16 | 6.75 | 10.08 | 11.51 | 5.79 | 7.07  |
| 19 | 6.61 | 9.41  | 8.35 | 5.16 | 6.61 | 8.49  | 12.17 | 7.03 | 9     |
| 20 | 6.62 | 8.89  | 8.15 | 6.8  | 6.74 | 7.97  | 12.13 | 5.94 | 8.4   |
| 21 | 6.66 | 9.39  | 8.29 | 6.27 | 6.54 | 8.13  | 12.06 | 6.85 | 8.61  |
| 22 | 8.49 | 11.16 | 6.16 | 8.33 | 6.16 | 11.84 | 7.97  | 7.75 | 11.75 |
| 23 | 5.06 | 9.6   | 5.82 | 5.02 | 7.81 | 8.49  | 10.79 | 6    | 7.09  |
| 24 | 6.54 | 9.35  | 6.86 | 5.54 | 7.29 | 9.17  | 11.59 | 7.3  | 8.54  |
| 25 | 6.39 | 9.95  | 6.54 | 6.13 | 9.3  | 11.75 | 11.81 | 6.31 | 8.91  |
| 26 | 6.23 | 10.27 | 6.71 | 6.99 | 8.95 | 11.86 | 11.99 | 6.99 | 10.02 |
| 27 | 6.52 | 9.38  | 8.98 | 5.79 | 7.93 | 10.83 | 13.3  | 7.69 | 9.42  |
| 28 | 7.5  | 8.67  | 1    | 8.06 | 8.46 | 8.56  | 8.84  | 3    | 8.55  |
| 29 | 8.02 | 8.4   | 0.86 | 7.87 | 8.25 | 8.31  | 8.77  | 3.44 | 8.12  |
| 30 | 7.32 | 7.41  | 1.77 | 7.16 | 8.41 | 7.67  | 8.5   | 2.77 | 6.94  |
| 31 | 6.85 | 8.46  | 7.89 | 4.59 | 6.67 | 9.19  | 12.53 | 6.94 | 7.94  |
| 32 | 6    | 8.24  | 7.82 | 5.7  | 6.31 | 9.58  | 13.36 | 6.49 | 9.05  |
| 33 | 6.74 | 9.19  | 7.2  | 5.24 | 7.98 | 9.11  | 12.15 | 6.34 | 8.81  |
| 34 | 6.88 | 7.92  | 8.99 | 4.55 | 6.13 | 9.89  | 13.3  | 6.78 | 8.72  |
| 35 | 6.58 | 7.56  | 0.45 | 7.15 | 7.25 | 8.54  | 8.1   | 4.84 | 7.8   |
| 36 | 6.48 | 7.57  | 1.25 | 6.94 | 6.91 | 7.65  | 7.78  | 2.25 | 6.71  |
| 37 | 5.93 | 8.1   | 0    | 6.91 | 6.7  | 8.19  | 8.18  | 1.93 | 7.25  |
| 38 | 7.28 | 7.53  | 0    | 8.09 | 7.35 | 7.74  | 8.37  | 0.32 | 8.17  |
| 39 | 6.58 | 7.46  | 1.34 | 7.09 | 7.14 | 7.44  | 7.91  | 1.34 | 7.53  |
| 40 | 6.62 | 6.9   | 2.1  | 6.74 | 7.33 | 7.73  | 8     | 1.1  | 7.29  |
| 41 | 6.68 | 7.04  | 0.31 | 7.09 | 7.29 | 8.08  | 8.36  | 2.63 | 7.1   |
| 42 | 7.27 | 5.41  | 2.41 | 8.84 | 6.8  | 6.22  | 8.27  | 4    | 9.57  |
| 43 | 7.7  | 8.66  | 1.06 | 8.17 | 8.36 | 8.63  | 8.69  | 3.38 | 8.33  |
| 44 | 7.54 | 8.66  | 1.33 | 8.32 | 8.83 | 9.05  | 8.98  | 1.33 | 8.25  |
| 45 | 6.51 | 9.36  | 2.45 | 7.26 | 8.31 | 9.43  | 8.74  | 4.77 | 8.13  |
| 46 | 7.44 | 8.56  | 1.75 | 7.95 | 8.15 | 8.84  | 8.57  | 2.92 | 7.91  |
| 47 | 7.41 | 8.49  | 4.55 | 7.65 | 7.76 | 8.77  | 9.78  | 5.03 | 8.44  |
| 48 | 7.1  | 8.58  | 1.3  | 7.25 | 8.42 | 8.65  | 8.81  | 3.3  | 8.34  |
| 49 | 7.58 | 7.94  | 0.71 | 6.97 | 8.59 | 7.81  | 8.87  | 3.29 | 7.61  |
| 50 | 7.9  | 8.23  | 0    | 8.55 | 8.03 | 8.44  | 8.86  | 3.22 | 8.9   |
| 51 | 5.93 | 7.5   | 6.29 | 5.5  | 6.6  | 7.63  | 10.87 | 5.4  | 7.45  |
| 52 | 6.53 | 7.74  | 7.06 | 5.44 | 7.12 | 6.85  | 11.61 | 5.81 | 7.42  |
| 53 | 6.64 | 7.91  | 7    | 6.23 | 7.12 | 7.26  | 11.3  | 5.87 | 7.67  |

<https://mc.manuscriptcentral.com/gut>

|    |      |       |      |      |      |       |       |      |       |
|----|------|-------|------|------|------|-------|-------|------|-------|
| 1  |      |       |      |      |      |       |       |      |       |
| 2  | 7    | 7.81  | 6.68 | 6.22 | 7.27 | 7.54  | 11.54 | 6.54 | 8.07  |
| 3  | 8.15 | 9.83  | 8.06 | 7.1  | 8.37 | 9.33  | 12.51 | 7.41 | 8.57  |
| 4  | 7.54 | 9.98  | 8.26 | 7.04 | 8.37 | 9.49  | 12.38 | 6.87 | 8.73  |
| 5  | 7.79 | 10.11 | 7.44 | 7.13 | 8.58 | 9.18  | 11.11 | 5.95 | 7.26  |
| 6  | 7.89 | 10.22 | 7.47 | 6.91 | 8.91 | 8.93  | 11.16 | 6.26 | 7.54  |
| 7  | 8.07 | 9.4   | 7.49 | 7.1  | 8.91 | 9.07  | 12.21 | 7.57 | 8.7   |
| 8  | 8.1  | 10.94 | 7.2  | 6.43 | 9.7  | 10.41 | 12.56 | 7.71 | 9.61  |
| 9  | 7.91 | 10.56 | 7.01 | 5.73 | 9.99 | 9.74  | 11.8  | 6.98 | 8.74  |
| 10 | 8.41 | 10.45 | 7.06 | 6.87 | 8.84 | 11.36 | 12.77 | 8.25 | 10.63 |
| 11 | 6.52 | 11.01 | 8.72 | 6.91 | 8.95 | 9.8   | 12.01 | 7.52 | 9.12  |
| 12 | 6.54 | 10.4  | 8.18 | 6.66 | 8.91 | 9.7   | 12.83 | 7.78 | 9.31  |
| 13 | 6.14 | 10.4  | 8.47 | 7.03 | 9.07 | 9.72  | 13.35 | 7.81 | 9.33  |
| 14 | 6.02 | 10.74 | 8.05 | 6.81 | 9.12 | 9.56  | 11.98 | 7.09 | 8.88  |
| 15 | 6.94 | 9.51  | 6.16 | 5.8  | 8.24 | 9.31  | 10.57 | 6.99 | 8.41  |
| 16 | 6.78 | 10.05 | 6.63 | 5.37 | 9.46 | 9.53  | 11.79 | 7.04 | 8.51  |
| 17 | 7.49 | 9.51  | 7.15 | 6.45 | 7.91 | 10.11 | 11.78 | 7.27 | 9.87  |
| 18 | 8.5  | 8.94  | 7.78 | 5.04 | 5.04 | 9.62  | 12.49 | 7.9  | 9.99  |
| 19 | 6.6  | 10.07 | 8.1  | 5.75 | 7.69 | 9.97  | 13.01 | 6.69 | 8.81  |
| 20 | 6.43 | 9.77  | 8.22 | 6.16 | 7.83 | 9.7   | 13.22 | 7.34 | 9.1   |
| 21 | 6.6  | 9.44  | 7.16 | 5.21 | 6.02 | 9.06  | 12.19 | 6.54 | 8.18  |
| 22 | 4.4  | 9.61  | 8.64 | 5.94 | 6.04 | 8.72  | 13.31 | 6.07 | 8.52  |
| 23 | 2.65 | 10.26 | 6.91 | 4.87 | 4.69 | 8.04  | 11.73 | 4.84 | 7.5   |
| 24 | 6.94 | 9.57  | 6.43 | 6.06 | 7.75 | 9.99  | 12.05 | 6.28 | 8.43  |
| 25 | 7.14 | 9.84  | 7.06 | 6.48 | 7.75 | 9.83  | 12.06 | 6.42 | 8.33  |
| 26 | 8.15 | 11.01 | 6.32 | 7.4  | 7.79 | 12.61 | 11.28 | 7.67 | 10.74 |
| 27 | 7.42 | 7.19  | 5.85 | 3.17 | 3.82 | 8.36  | 10.67 | 6.98 | 8.08  |
| 28 | 6.31 | 7.78  | 6.08 | 5.55 | 5.38 | 8.89  | 10.9  | 6.57 | 7.95  |
| 29 | 5.32 | 8.1   | 6.55 | 4.85 | 5.29 | 7.92  | 11.31 | 6.32 | 7.37  |
| 30 | 5.81 | 8.05  | 7.15 | 5.07 | 2.9  | 7.85  | 12.68 | 7.42 | 8.6   |
| 31 | 7.62 | 7.64  | 1.76 | 7.31 | 7.37 | 8.54  | 8.01  | 1.76 | 7.4   |
| 32 | 7.21 | 7.63  | 2.72 | 7.2  | 7.23 | 9.41  | 8.56  | 3.53 | 7.43  |
| 33 | 7.21 | 7.53  | 2.47 | 7.22 | 7.34 | 8.11  | 7.73  | 1.88 | 7.21  |
| 34 | 7.31 | 7.53  | 0.96 | 7.35 | 7.53 | 8.47  | 7.91  | 2.96 | 7.66  |
| 35 | 6.46 | 8.48  | 4.31 | 5.4  | 6.6  | 7.72  | 9.26  | 5.65 | 6.95  |
| 36 | 6.32 | 8.81  | 4.57 | 6.14 | 6.53 | 8.15  | 9.94  | 5.05 | 7.04  |
| 37 | 6.01 | 8.4   | 5.19 | 6    | 6.6  | 8.17  | 10.83 | 5.32 | 6.85  |
| 38 | 6.03 | 8.07  | 7.31 | 6.05 | 6.61 | 8.12  | 11.49 | 5.84 | 7.64  |
| 39 | 8.93 | 6.16  | 3.81 | 5.6  | 4.94 | 8.6   | 9.82  | 7.92 | 9.24  |
| 40 | 6.67 | 10.01 | 5.71 | 6.22 | 7.59 | 10.59 | 11.66 | 6.16 | 9.13  |
| 41 | 6.69 | 9.59  | 6.09 | 4.74 | 7.81 | 9.5   | 10.75 | 7.51 | 9.02  |
| 42 | 7.63 | 11.12 | 4.82 | 6.69 | 6.99 | 11.43 | 10.35 | 8.46 | 11.11 |
| 43 | 6.34 | 9.64  | 6.31 | 6    | 6.98 | 8.82  | 11.35 | 6.29 | 8.14  |
| 44 | 6.83 | 10.27 | 7.1  | 7.97 | 7.32 | 11.42 | 11.33 | 9.21 | 10.99 |
| 45 | 6.24 | 9.2   | 7.79 | 5.54 | 7.87 | 9.78  | 12.57 | 7    | 8.48  |
| 46 | 6.04 | 8.93  | 8.84 | 6.27 | 7.59 | 9.9   | 13.63 | 6.7  | 8.72  |
| 47 | 7.83 | 8.51  | 4.38 | 4    | 6.7  | 10.07 | 6.38  | 3.68 | 9.82  |
| 48 | 7.25 | 8.25  | 6.74 | 6.27 | 6.79 | 10.07 | 11.35 | 6.63 | 9.75  |
| 49 | 7.62 | 8.21  | 6.36 | 5.08 | 6.6  | 10.23 | 11.3  | 6.32 | 9.23  |
| 50 | 7.63 | 8.1   | 5.54 | 6.11 | 6.9  | 9.29  | 10.95 | 6.48 | 8.76  |
| 51 | 6.75 | 7.99  | 7.05 | 4.1  | 7.08 | 8.29  | 12.04 | 7.02 | 7.69  |
| 52 | 6.14 | 7.46  | 6.72 | 5.34 | 6.11 | 8.67  | 12.24 | 6.62 | 7.69  |
| 53 | 5.88 | 7.49  | 6.45 | 5.64 | 6.56 | 8.6   | 11.98 | 6.29 | 7.6   |

<https://mc.manuscriptcentral.com/gut>

|      |       |      |      |      |       |       |      |       |
|------|-------|------|------|------|-------|-------|------|-------|
| 6.22 | 8.32  | 6.37 | 4.96 | 6.37 | 9.51  | 11.55 | 6.54 | 8.55  |
| 7.12 | 8.25  | 7.92 | 5.85 | 5.49 | 10.44 | 11.54 | 5.42 | 7.68  |
| 5.98 | 8.15  | 6.56 | 5.44 | 5.76 | 9.81  | 11.29 | 4.76 | 6.49  |
| 5.77 | 8.03  | 6.32 | 4.95 | 6.13 | 10.07 | 11.67 | 5.07 | 6.7   |
| 6.46 | 8.17  | 4.14 | 6.98 | 7.98 | 10.36 | 8.77  | 4.72 | 8.46  |
| 5.59 | 8.02  | 7.6  | 3.96 | 4.92 | 7.54  | 11.58 | 6.31 | 7.81  |
| 3.77 | 8.42  | 5.32 | 3.39 | 4.42 | 6.48  | 8.89  | 5.56 | 7.23  |
| 3.35 | 8.6   | 5.08 | 3.26 | 4.16 | 6.31  | 8.6   | 5.26 | 6.86  |
| 6.86 | 7.63  | 0.27 | 7.37 | 7.99 | 7.72  | 8.22  | 0.27 | 7.17  |
| 6.54 | 7.69  | 5.42 | 6.69 | 7.27 | 8.68  | 10.83 | 5.09 | 7.84  |
| 7.88 | 8.85  | 7.15 | 4.78 | 6.16 | 9.97  | 12.32 | 7.02 | 8.4   |
| 6.75 | 9.07  | 6.75 | 6.02 | 6.93 | 9.45  | 12.06 | 6.21 | 7.82  |
| 7.63 | 9     | 6.78 | 5.06 | 6.49 | 10.25 | 11.98 | 6.62 | 8.97  |
| 7.81 | 8.15  | 8.81 | 5.45 | 6.01 | 9.82  | 13.94 | 7.08 | 8.62  |
| 8.69 | 11.86 | 4.87 | 7.24 | 7.94 | 10.98 | 9.39  | 7.45 | 10.31 |
| 7.47 | 8.15  | 5.44 | 5.47 | 7.24 | 8.58  | 10.85 | 6.89 | 8.08  |
| 6.95 | 7.55  | 5.52 | 6.28 | 7.3  | 8.19  | 10.6  | 6.57 | 7.56  |
| 7.42 | 8.46  | 5.78 | 5.51 | 7.09 | 8.89  | 10.86 | 7.3  | 8.36  |

1  
2  
3  
4  
5  
6  
7  
8  
9  
10  
11  
12  
13  
14  
15  
16  
17  
18  
19  
20  
21  
22  
23  
24  
25  
26  
27  
28  
29  
30  
31  
32  
33  
34  
35  
36  
37  
38  
39  
40  
41  
42  
43  
44  
45  
46  
47  
48  
49  
50  
51  
52  
53  
54  
55  
56  
57  
58  
59  
60

| MAP2K1 | MAP2K2 | MAP2K4 | MAP3K7 | MAPK1 | MAPK3 | MAPKAPK3 | MCAM | MED1  |
|--------|--------|--------|--------|-------|-------|----------|------|-------|
| 7.8    | 9.13   | 7.01   | 8.01   | 7.65  | 7.47  | 5.02     | 7.07 | 6.94  |
| 8.21   | 9.35   | 7.16   | 7.6    | 7.9   | 8.98  | 5.16     | 8.69 | 7.46  |
| 7.92   | 9.38   | 7.41   | 7.51   | 7.73  | 8.84  | 5.37     | 8.02 | 7.14  |
| 8.13   | 10.11  | 7.29   | 7.82   | 8.18  | 9.39  | 6.13     | 9.02 | 8.06  |
| 7.71   | 9.33   | 7.93   | 8.24   | 6.71  | 3.59  | 2.59     | 8.39 | 1.01  |
| 7.91   | 8.87   | 6.9    | 8.1    | 7.59  | 9.27  | 5.08     | 7.81 | 7.55  |
| 7.96   | 8.92   | 6.98   | 8.25   | 7.67  | 9.41  | 5.13     | 8.08 | 7.46  |
| 8.02   | 10.5   | 6.56   | 8.28   | 7.24  | 10.32 | 6.15     | 8.43 | 8.21  |
| 7.73   | 9.78   | 6.97   | 8.31   | 8.05  | 9     | 7.19     | 7.39 | 7.72  |
| 7.79   | 8.99   | 6.94   | 8.1    | 7.69  | 8.89  | 5.91     | 6.98 | 7.2   |
| 8.05   | 9.46   | 7.2    | 8.18   | 8.32  | 9.25  | 6.93     | 6.99 | 7.83  |
| 8.4    | 9.67   | 7.16   | 8.33   | 8.52  | 9.46  | 6.59     | 8.4  | 7.67  |
| 7.2    | 9.56   | 7.21   | 8.64   | 7.95  | 8.65  | 5.72     | 7.14 | 7.9   |
| 7.93   | 9.54   | 7.2    | 8.37   | 8.36  | 8.82  | 5.63     | 7.83 | 7.97  |
| 7.94   | 11.41  | 6.94   | 8.07   | 7.79  | 8.97  | 6.98     | 8.78 | 8.84  |
| 8.46   | 9.34   | 7.35   | 8.3    | 7.68  | 8.83  | 5.26     | 7.72 | 8.02  |
| 8.53   | 9.24   | 7.56   | 8.57   | 8.13  | 9.02  | 5.87     | 7.84 | 8.22  |
| 8.22   | 9.66   | 7.24   | 8.3    | 7.72  | 8.72  | 5.89     | 8.35 | 8.18  |
| 8.08   | 11.11  | 7.5    | 8.38   | 8.31  | 9.47  | 6.44     | 8.39 | 8.46  |
| 8.41   | 9.97   | 7.82   | 8.58   | 8.81  | 9.34  | 5.8      | 8.5  | 8.68  |
| 8.17   | 10.2   | 7.76   | 8.57   | 8.68  | 9.12  | 6.41     | 8.88 | 8.58  |
| 8.34   | 9.88   | 7.89   | 8.72   | 8.73  | 9.71  | 5.96     | 8.84 | 8.76  |
| 8.27   | 9.78   | 7.81   | 8.86   | 8.57  | 9.43  | 6.57     | 8.62 | 8.82  |
| 8.43   | 9.67   | 7.73   | 8.81   | 8.83  | 9.28  | 6.1      | 9.01 | 8.68  |
| 8.39   | 9.69   | 7.72   | 8.59   | 9.11  | 8.56  | 6.23     | 7.63 | 11.36 |
| 9.12   | 9.98   | 7.16   | 8.31   | 8.43  | 9.74  | 6.04     | 8.05 | 11.67 |
| 8.84   | 9.88   | 7.26   | 8.23   | 8.35  | 9.91  | 5.81     | 7.84 | 11.82 |
| 8.65   | 9.61   | 7.4    | 7.89   | 8.16  | 9.09  | 5.62     | 8.17 | 11.09 |
| 8.15   | 9.38   | 7.44   | 7.76   | 7.67  | 8.6   | 4.16     | 7.53 | 7.41  |
| 7.91   | 9.51   | 7.34   | 8.01   | 7.81  | 8.7   | 5.16     | 7.75 | 7.28  |
| 8.22   | 9.39   | 7.36   | 7.68   | 7.92  | 8.62  | 4.52     | 7.7  | 7.54  |
| 8.1    | 9.71   | 7.53   | 7.98   | 7.29  | 8.4   | 4.88     | 8.06 | 7.17  |
| 8.04   | 9.42   | 7.41   | 8.26   | 8.23  | 8.14  | 5.25     | 7.08 | 7.59  |
| 7.71   | 9.78   | 7.76   | 8.77   | 8.45  | 9.38  | 5.55     | 8.53 | 8.57  |
| 8.16   | 9.96   | 7.57   | 8.6    | 8.36  | 9.82  | 5.13     | 8.65 | 8.86  |
| 7.73   | 10.13  | 7.38   | 8.55   | 8.19  | 9.55  | 6.28     | 8.45 | 8.45  |
| 7.57   | 10.12  | 6.75   | 7.72   | 7.48  | 7.56  | 6.15     | 6.3  | 7.97  |
| 7.99   | 9.69   | 7.02   | 7.71   | 8.12  | 7.98  | 5.8      | 6.37 | 7.91  |
| 7.59   | 9.7    | 6.81   | 7.6    | 7.73  | 7.8   | 5.41     | 6.67 | 7.82  |
| 7.93   | 9.63   | 6.9    | 7.61   | 7.92  | 7.64  | 6.01     | 6.65 | 7.92  |
| 7.23   | 8.43   | 6.64   | 7.4    | 6.79  | 7.19  | 4.16     | 7.48 | 6.7   |
| 7.35   | 8.37   | 6.56   | 7.33   | 6.73  | 7.21  | 3.98     | 6.95 | 7.01  |
| 6.96   | 8.22   | 7.1    | 7.2    | 7.18  | 7.4   | 2.22     | 7.1  | 6.71  |
| 6.79   | 8.26   | 6.31   | 7.5    | 7.19  | 7.79  | 4.27     | 6.92 | 7.56  |
| 6.56   | 11.81  | 5.67   | 8.03   | 6.18  | 8.07  | 7.56     | 7.38 | 8.22  |
| 7.56   | 9.06   | 6.46   | 8.58   | 8.15  | 8.43  | 5.22     | 7.61 | 8.23  |
| 7.69   | 9.09   | 6.32   | 8.44   | 8.38  | 8.11  | 5.58     | 7.83 | 8.32  |
| 7.49   | 9.06   | 6.6    | 8.49   | 8.17  | 8.31  | 4.94     | 7.86 | 8.21  |
| 8.49   | 10.63  | 7.28   | 8.89   | 8.38  | 9.63  | 6.74     | 8.31 | 9.65  |
| 8.63   | 10.12  | 7.55   | 8.95   | 8.82  | 9.52  | 6.61     | 8.58 | 9.82  |
| 8.37   | 10.21  | 7.55   | 9.01   | 8.61  | 9.38  | 6.62     | 8.43 | 10.03 |

<https://mc.manuscriptcentral.com/gut>

1  
2  
3  
4  
5  
6  
7  
8  
9  
10  
11  
12  
13  
14  
15  
16  
17  
18  
19  
20  
21  
22  
23  
24  
25  
26  
27  
28  
29  
30  
31  
32  
33  
34  
35  
36  
37  
38  
39  
40  
41  
42  
43  
44  
45  
46  
47  
48  
49  
50  
51  
52  
53  
54  
55  
56  
57  
58  
59  
60

|      |       |      |      |      |       |      |      |      |
|------|-------|------|------|------|-------|------|------|------|
| 8.54 | 9.99  | 7.57 | 9    | 8.63 | 9.34  | 6.4  | 8.62 | 9.84 |
| 8.36 | 9.54  | 7.44 | 8.71 | 7.89 | 9.67  | 6.03 | 7.48 | 7.86 |
| 8.3  | 9.28  | 7.45 | 8.57 | 8.15 | 9.6   | 5.68 | 8.27 | 7.64 |
| 8.25 | 9.38  | 7.5  | 8.7  | 8.34 | 9.66  | 5.81 | 8.18 | 7.98 |
| 8.01 | 9.24  | 7.48 | 8.56 | 7.98 | 9.48  | 5.75 | 7.99 | 7.96 |
| 8.45 | 9.51  | 7.41 | 8.42 | 8.38 | 9.47  | 5.62 | 7.43 | 9.4  |
| 8.67 | 10.14 | 7.41 | 8.41 | 8.63 | 9.77  | 6.38 | 8.5  | 8.67 |
| 9.06 | 9.85  | 7.29 | 8.65 | 8.65 | 10.24 | 6.76 | 7.61 | 8.8  |
| 8.83 | 10.63 | 7.02 | 8.53 | 9.08 | 9.94  | 6.63 | 8.55 | 8.54 |
| 8.26 | 9.05  | 6.27 | 9.09 | 8.37 | 9.47  | 5.97 | 6.97 | 8.46 |
| 8.34 | 9.49  | 6.95 | 8.99 | 8.56 | 9.45  | 6    | 7.54 | 8.52 |
| 8.4  | 9.12  | 6.52 | 8.9  | 8.62 | 9.47  | 5.99 | 7.35 | 8.6  |
| 8.35 | 9.03  | 6.3  | 8.7  | 8.57 | 9.48  | 6    | 7.39 | 8.49 |
| 6.74 | 12.74 | 6.74 | 8.74 | 6.74 | 7.15  | 5.15 | 9.67 | 6.15 |
| 8.16 | 11.42 | 7.5  | 8.6  | 6.83 | 7.79  | 6.11 | 9.2  | 7.23 |
| 7.96 | 10.34 | 7.8  | 8.05 | 7.28 | 7.38  | 4.83 | 8.29 | 7.34 |
| 8.95 | 10.75 | 8.68 | 9.5  | 7.65 | 1.24  | 1.24 | 9.86 | 0.24 |
| 8.54 | 10.76 | 8.37 | 9.31 | 7.31 | 3.36  | 3.36 | 9.73 | 1.77 |
| 8.9  | 9.88  | 7.51 | 7.8  | 8.35 | 9.38  | 6.21 | 7.92 | 8.54 |
| 9.02 | 9.9   | 7.61 | 8.07 | 8.55 | 9.7   | 6.23 | 7.72 | 8.46 |
| 8.63 | 9.81  | 7.67 | 8.15 | 8.23 | 9.17  | 6.15 | 7.39 | 8.12 |
| 8.54 | 9.91  | 7.07 | 8.58 | 8.73 | 10.6  | 6.3  | 8    | 8.99 |
| 8.33 | 9.92  | 7.21 | 8.38 | 8.65 | 10.01 | 5.74 | 8.14 | 8.84 |
| 7.97 | 9.33  | 7.68 | 8.54 | 7.71 | 8.6   | 5.44 | 8.12 | 8.42 |
| 8.83 | 10.35 | 8.15 | 8.81 | 9.4  | 10.35 | 5.81 | 7.9  | 8.8  |
| 8.86 | 10.31 | 8.05 | 8.9  | 9.41 | 10.08 | 5.82 | 8.22 | 9.03 |
| 8.86 | 10.39 | 8.17 | 8.88 | 9.38 | 10.08 | 6.42 | 7.95 | 9.05 |
| 8.19 | 9.57  | 7.64 | 8.7  | 8    | 8.56  | 5.36 | 7.72 | 8.39 |
| 7.91 | 9.6   | 7.57 | 8.91 | 7.97 | 8.47  | 5.86 | 7.77 | 8.51 |
| 7.74 | 9.74  | 7.6  | 8.73 | 7.93 | 8.49  | 5.55 | 7.89 | 8.17 |
| 8.47 | 9.75  | 8.14 | 8.44 | 8.62 | 9.01  | 5.76 | 8.37 | 7.86 |
| 8.49 | 9.98  | 7.84 | 8.03 | 8.56 | 9.31  | 5.93 | 8.1  | 7.69 |
| 8.5  | 10.26 | 7.94 | 8.29 | 8.26 | 9.16  | 6.08 | 7.91 | 7.56 |
| 8.1  | 9.12  | 6.92 | 7.68 | 8.23 | 8.97  | 5.43 | 7.8  | 7.84 |
| 8.24 | 9.18  | 7    | 7.68 | 8.27 | 9.3   | 5.4  | 7.72 | 7.76 |
| 8.29 | 9.22  | 6.8  | 8.05 | 8.29 | 9.1   | 5.13 | 7.99 | 7.81 |
| 7.99 | 9.31  | 7.64 | 8.19 | 7.83 | 8.5   | 4.83 | 7.39 | 7.32 |
| 7.99 | 9.31  | 7.64 | 8.19 | 7.83 | 8.5   | 4.83 | 7.39 | 7.32 |
| 8.03 | 9.72  | 7.38 | 7.86 | 7.61 | 9.46  | 4.32 | 7.96 | 7.85 |
| 7.86 | 9.61  | 7.42 | 8.09 | 7.87 | 9.1   | 4.82 | 8.55 | 7.54 |
| 7.68 | 9.54  | 7.57 | 8.24 | 7.94 | 9.25  | 4.77 | 8.07 | 7.53 |
| 8.23 | 9.01  | 7.9  | 8.05 | 7.62 | 6.98  | 3.88 | 7.56 | 6.56 |
| 8.23 | 9.31  | 7.66 | 7.94 | 7.98 | 8.67  | 4.55 | 8.42 | 7.58 |
| 8.23 | 9.58  | 7.37 | 7.94 | 7.98 | 9.2   | 4.76 | 8.24 | 7.74 |
| 7.97 | 9.53  | 7.91 | 7.74 | 7.62 | 8.31  | 4.42 | 8.4  | 7    |
| 7.57 | 10.12 | 6.97 | 8.4  | 8.33 | 10.31 | 5.46 | 7.75 | 9.43 |
| 7.66 | 9.97  | 7.13 | 8.26 | 8.06 | 10.74 | 5.54 | 7.7  | 9.22 |
| 7.57 | 10.78 | 6.69 | 8.21 | 7.84 | 10.4  | 5.8  | 8.02 | 9.14 |
| 8.14 | 8.91  | 7.78 | 7.94 | 7.99 | 7.46  | 4.74 | 7.63 | 7.03 |
| 7.93 | 9.4   | 7.64 | 7.75 | 7.89 | 8.09  | 4.66 | 8.51 | 7.08 |
| 8    | 9.23  | 7.69 | 7.84 | 7.63 | 7.95  | 4.54 | 8.43 | 6.78 |
| 7.82 | 9.01  | 7.17 | 7.6  | 7.47 | 8.04  | 4.57 | 7.42 | 6.79 |

<https://mc.manuscriptcentral.com/gut>

|    |      |       |      |      |      |       |      |      |      |
|----|------|-------|------|------|------|-------|------|------|------|
| 1  |      |       |      |      |      |       |      |      |      |
| 2  | 7.91 | 8.98  | 7.11 | 7.76 | 7.9  | 8.49  | 5.35 | 7.6  | 6.89 |
| 3  | 8.11 | 9.75  | 7.79 | 7.64 | 7.19 | 7.2   | 4.87 | 8.18 | 5.17 |
| 4  | 7.98 | 9.68  | 7.54 | 8.5  | 8.3  | 8.38  | 5.6  | 7.2  | 8.12 |
| 5  | 8.47 | 9.72  | 7.82 | 8.12 | 8.81 | 9.64  | 6.29 | 8.47 | 8.17 |
| 6  | 8.14 | 9.63  | 7.79 | 8.24 | 8.78 | 9.42  | 5.78 | 8.93 | 7.86 |
| 7  | 7.75 | 10.23 | 6.83 | 7.58 | 8.04 | 8.56  | 6.13 | 7.53 | 8.27 |
| 8  | 7.9  | 9.65  | 5.25 | 8.19 | 8.11 | 8.25  | 5.99 | 7.46 | 8.28 |
| 9  | 7.77 | 9.75  | 5.34 | 8.39 | 8.14 | 8.24  | 6.36 | 7.62 | 8.3  |
| 10 | 7.62 | 12.37 | 5.08 | 7.25 | 6.82 | 9.14  | 7.02 | 8.99 | 8.33 |
| 11 | 7.64 | 10.15 | 6.6  | 8.08 | 7.45 | 9.75  | 6.32 | 7.89 | 7.8  |
| 12 | 7.81 | 9.29  | 6.64 | 8.02 | 8    | 10.02 | 5.88 | 7.71 | 7.96 |
| 13 | 7.79 | 8.58  | 7.03 | 7.86 | 7.74 | 8.94  | 4.41 | 7.39 | 7.32 |
| 14 | 7.65 | 11.75 | 6.78 | 7.75 | 6.43 | 9.89  | 6.85 | 8.41 | 7.55 |
| 15 | 8.48 | 9.32  | 8.4  | 8.23 | 7.11 | 0.2   | 1.79 | 8.83 | 1.79 |
| 16 | 7.86 | 8.84  | 6.85 | 8.33 | 8.12 | 8.81  | 5.99 | 7.49 | 8.17 |
| 17 | 8.02 | 8.67  | 6.9  | 8.38 | 8.29 | 9     | 5.56 | 7.54 | 8.22 |
| 18 | 7.98 | 8.64  | 6.69 | 8.42 | 8.19 | 8.98  | 5.81 | 7.58 | 8.25 |
| 19 | 9.15 | 9.25  | 7.04 | 8.14 | 8.43 | 9.54  | 6.66 | 6.62 | 7.99 |
| 20 | 8.58 | 8.92  | 6.96 | 7.68 | 7.75 | 8.51  | 5.94 | 6.72 | 7.35 |
| 21 | 8.96 | 9.2   | 7.14 | 7.9  | 8.11 | 8.79  | 6.43 | 7.2  | 7.52 |
| 22 | 7.75 | 13.86 | 5.16 | 7.49 | 5.16 | 7.49  | 7.97 | 8.86 | 6.16 |
| 23 | 8.22 | 8.97  | 6.25 | 8.22 | 8.33 | 9.8   | 4.78 | 7.8  | 8.12 |
| 24 | 8.12 | 9.45  | 6.93 | 8.14 | 8.12 | 9.43  | 5.12 | 7.55 | 7.94 |
| 25 | 7.47 | 10.38 | 5.43 | 7.84 | 6.85 | 9.2   | 6.67 | 8.53 | 8.03 |
| 26 | 7.46 | 10.89 | 5.3  | 7.78 | 6.71 | 9.33  | 6.58 | 8.9  | 8.14 |
| 27 | 7.66 | 10.11 | 6.21 | 8.27 | 7.82 | 8.99  | 6.4  | 8.4  | 7.98 |
| 28 | 7.8  | 9.27  | 7.82 | 7.8  | 7    | 5     | 3.58 | 7.82 | 3.58 |
| 29 | 7.9  | 8.81  | 7.91 | 7.75 | 6.81 | 2.44  | 0.86 | 7.85 | 0.86 |
| 30 | 7.81 | 8.55  | 7.94 | 7.9  | 6.29 | 2.77  | 4.57 | 8.03 | 1.77 |
| 31 | 6.78 | 8.47  | 5.82 | 7.18 | 7.93 | 8.21  | 3.18 | 6.08 | 7.24 |
| 32 | 6.56 | 8.85  | 5.68 | 7.28 | 7.76 | 8.52  | 3.76 | 8.06 | 7.34 |
| 33 | 7.23 | 9.3   | 5.54 | 6.97 | 7.84 | 8.06  | 4.5  | 8.09 | 7.45 |
| 34 | 7.21 | 8.64  | 6.28 | 7.36 | 7.77 | 8.38  | 4.48 | 8.78 | 7.31 |
| 35 | 7.33 | 8.74  | 7.27 | 6.86 | 6.04 | 4.62  | 2.77 | 7.44 | 3.91 |
| 36 | 7.33 | 8.12  | 6.87 | 6.46 | 5.81 | 5.78  | 2.25 | 6.81 | 3.95 |
| 37 | 7.16 | 8.37  | 6.98 | 6.21 | 5.94 | 6     | 2.34 | 6.91 | 5.15 |
| 38 | 7.67 | 8.76  | 7.29 | 7.7  | 6.46 | 0.91  | 0    | 8.57 | 0.32 |
| 39 | 7.24 | 8.14  | 7.36 | 6.73 | 6.58 | 2.34  | 2.34 | 7.09 | 3.34 |
| 40 | 7.05 | 8.21  | 7.42 | 6.8  | 6.65 | 4.27  | 2.68 | 7.42 | 3.1  |
| 41 | 7.35 | 7.97  | 7.25 | 6.89 | 6.04 | 3.12  | 2.31 | 6.98 | 1.31 |
| 42 | 4    | 9.64  | 6.8  | 8.24 | 5.22 | 2.41  | 2.41 | 9.66 | 2.41 |
| 43 | 8.4  | 9.36  | 7.93 | 7.96 | 7.12 | 4.38  | 1.06 | 8.01 | 2.64 |
| 44 | 8.54 | 9.04  | 8.27 | 8.13 | 7.15 | 2.79  | 0.91 | 8.27 | 1.33 |
| 45 | 8.08 | 9.79  | 7.6  | 7.67 | 6.65 | 7.45  | 4.95 | 7.73 | 6.7  |
| 46 | 8.2  | 9.19  | 7.68 | 7.86 | 7.03 | 4.66  | 3.33 | 8.21 | 3.33 |
| 47 | 7.87 | 9.49  | 7.09 | 7.34 | 7.05 | 7.38  | 3.76 | 7.68 | 7.33 |
| 48 | 7.88 | 9.28  | 7.81 | 7.13 | 7.17 | 4.69  | 3.88 | 7.77 | 5.42 |
| 49 | 7.77 | 8.44  | 7.94 | 7.51 | 7.42 | 4.03  | 3.51 | 7.42 | 1.71 |
| 50 | 7.57 | 9.31  | 7.9  | 7.78 | 7.41 | 2.48  | 0.9  | 8.63 | 3.71 |
| 51 | 7.32 | 8.5   | 7.37 | 7.73 | 7.39 | 7.74  | 4.56 | 6.99 | 7.22 |
| 52 | 7.61 | 8.93  | 7.01 | 7.61 | 7.87 | 8.26  | 4.87 | 7.08 | 7.42 |
| 53 | 7.55 | 9.1   | 6.97 | 7.33 | 7.89 | 8.08  | 4.99 | 7.5  | 7.37 |

<https://mc.manuscriptcentral.com/gut>

1  
2  
3  
4  
5  
6  
7  
8  
9  
10  
11  
12  
13  
14  
15  
16  
17  
18  
19  
20  
21  
22  
23  
24  
25  
26  
27  
28  
29  
30  
31  
32  
33  
34  
35  
36  
37  
38  
39  
40  
41  
42  
43  
44  
45  
46  
47  
48  
49  
50  
51  
52  
53  
54  
55  
56  
57  
58  
59  
60

|      |       |      |      |      |       |      |      |       |
|------|-------|------|------|------|-------|------|------|-------|
| 7.59 | 9.1   | 7.05 | 7.64 | 7.94 | 8.2   | 4.08 | 7.15 | 7.2   |
| 9.28 | 9.65  | 7.41 | 8.72 | 7.99 | 9.77  | 5.32 | 7.91 | 8.53  |
| 9.19 | 9.8   | 7.6  | 8.63 | 8.2  | 9.98  | 5.43 | 8.2  | 8.53  |
| 9.35 | 9.43  | 7.28 | 7.96 | 7.86 | 9.58  | 5.6  | 7.51 | 8.49  |
| 9.38 | 9.38  | 7.26 | 7.98 | 7.75 | 9.55  | 5    | 7.69 | 8.62  |
| 8.41 | 9.85  | 7.89 | 9.03 | 8.24 | 8.74  | 5.95 | 7.73 | 10.62 |
| 8.71 | 10.99 | 7.4  | 8.33 | 8.05 | 9.51  | 6.72 | 8.25 | 10.25 |
| 8.53 | 10.27 | 7.26 | 8.79 | 8.43 | 9.44  | 6.55 | 7.87 | 9.76  |
| 8.04 | 11.18 | 7.51 | 8.61 | 7.96 | 9.5   | 6.7  | 9.73 | 9.46  |
| 8.73 | 9.76  | 7.91 | 8.94 | 8.56 | 10.46 | 5.93 | 8.69 | 8.87  |
| 8.3  | 9.81  | 7.83 | 9.02 | 8.6  | 10    | 6.19 | 8.7  | 8.79  |
| 8.54 | 9.96  | 7.92 | 9.11 | 8.45 | 10.09 | 6.36 | 8.62 | 8.81  |
| 8.34 | 9.88  | 7.68 | 9.12 | 8.53 | 10.18 | 6.09 | 8.83 | 8.85  |
| 7.79 | 9.41  | 6.4  | 8.14 | 7.79 | 9.04  | 4.8  | 6.96 | 8.77  |
| 7.98 | 9.76  | 5.39 | 8.36 | 8.04 | 9.44  | 5.64 | 8.17 | 9.24  |
| 7.89 | 10.25 | 6.76 | 7.68 | 7.61 | 8.77  | 5.95 | 9.37 | 8.16  |
| 7.84 | 9.6   | 6.75 | 8.17 | 8.17 | 8.78  | 5.52 | 7.83 | 8.4   |
| 8.15 | 9.95  | 6.42 | 8.16 | 8.45 | 8.83  | 6.28 | 7.89 | 8.37  |
| 7.91 | 9.83  | 6.38 | 8.29 | 8.46 | 8.61  | 6.35 | 8.99 | 8.2   |
| 8.01 | 9.42  | 6.77 | 8.08 | 8.22 | 9.68  | 6.45 | 7.08 | 8.2   |
| 8.18 | 10.12 | 6.85 | 8.48 | 8.52 | 9.02  | 6.11 | 8.13 | 8.72  |
| 7.9  | 9.94  | 6.75 | 8.4  | 8.53 | 9.11  | 5.95 | 7.58 | 8.67  |
| 7.93 | 9.54  | 7.01 | 8.11 | 7.86 | 9.16  | 5.43 | 8.23 | 7.53  |
| 7.63 | 9.45  | 7.21 | 8.21 | 8.01 | 9.49  | 5.32 | 7.88 | 7.36  |
| 7.74 | 11.94 | 6.32 | 7.96 | 6.74 | 9.58  | 6.85 | 9.63 | 8.19  |
| 6.96 | 8.72  | 5.75 | 7.6  | 7.6  | 7.91  | 5.27 | 5.82 | 7.51  |
| 7.2  | 8.27  | 6.22 | 7.04 | 7.67 | 8.12  | 4.88 | 7.38 | 6.74  |
| 7.28 | 8.22  | 5.87 | 7.16 | 7.86 | 8.18  | 4.93 | 7.17 | 7.53  |
| 7.81 | 8.47  | 5.6  | 7.54 | 7.63 | 8.76  | 4.71 | 7.39 | 8.42  |
| 7.73 | 7.87  | 7.34 | 6.89 | 6.22 | 3.34  | 1.76 | 7.54 | 1.76  |
| 7.35 | 8.93  | 6.89 | 7    | 6.36 | 6.18  | 3.53 | 7.06 | 3.89  |
| 7.51 | 7.95  | 7.57 | 7.05 | 6.5  | 4.47  | 0.88 | 7.61 | 3.21  |
| 7.33 | 8.31  | 7.3  | 6.74 | 6.31 | 3.76  | 0.96 | 7.35 | 1.96  |
| 6.92 | 8.13  | 6.27 | 7.12 | 6.45 | 6.8   | 4.53 | 6.48 | 6.49  |
| 6.85 | 8.24  | 6.49 | 6.83 | 6.15 | 7.07  | 4.25 | 6.97 | 5.79  |
| 6.82 | 7.97  | 6.65 | 6.76 | 6.48 | 7.07  | 3.47 | 7.31 | 5.88  |
| 6.88 | 8.26  | 6.53 | 7.02 | 6.38 | 7.2   | 3.97 | 7.03 | 6.14  |
| 8.01 | 9.54  | 7.25 | 8.5  | 8.41 | 8.3   | 5.56 | 6.78 | 8.81  |
| 7.02 | 9.95  | 6.85 | 8.29 | 8.26 | 9.77  | 5.63 | 7.48 | 8.58  |
| 8.19 | 10.26 | 7.06 | 8.3  | 8.13 | 9.61  | 6.09 | 7.85 | 9.24  |
| 8.01 | 12.38 | 6.69 | 7.55 | 6.76 | 9.44  | 7.4  | 7.44 | 8.48  |
| 7.98 | 9.4   | 6.82 | 8.61 | 7.99 | 9.43  | 5.25 | 6.93 | 8.14  |
| 6.51 | 12.37 | 6.1  | 7.97 | 7.83 | 9.6   | 7.1  | 8.6  | 8.42  |
| 8.15 | 9.69  | 7.64 | 8.48 | 8.43 | 9.45  | 5.65 | 7.26 | 8.45  |
| 7.97 | 9.6   | 7.53 | 8.49 | 8.69 | 9.79  | 5.72 | 7.16 | 8.45  |
| 8.67 | 9.24  | 7.38 | 9.03 | 7.92 | 9.12  | 5.44 | 6.7  | 9.24  |
| 8.32 | 9.65  | 7.32 | 8.38 | 7.77 | 8.59  | 5.41 | 7.91 | 8.65  |
| 8.45 | 9.36  | 7.28 | 8.76 | 8.03 | 8.79  | 5.89 | 7.39 | 8.86  |
| 8.46 | 9.27  | 7.21 | 8.26 | 7.65 | 8.23  | 4.65 | 8.02 | 8.4   |
| 7.49 | 8.89  | 6.29 | 7.52 | 7.61 | 8.1   | 5.16 | 5.66 | 7.71  |
| 6.92 | 8.29  | 6.36 | 7.7  | 7.57 | 7.47  | 4.11 | 7.34 | 6.89  |
| 6.86 | 8.29  | 6.04 | 7.24 | 7.45 | 7.3   | 4.42 | 7.1  | 6.45  |

<https://mc.manuscriptcentral.com/gut>



1  
2  
3  
4  
5  
6  
7  
8  
9  
10  
11  
12  
13  
14  
15  
16  
17  
18  
19  
20  
21  
22  
23  
24  
25  
26  
27  
28  
29  
30  
31  
32  
33  
34  
35  
36  
37  
38  
39  
40  
41  
42  
43  
44  
45  
46  
47  
48  
49  
50  
51  
52  
53  
54  
55  
56  
57  
58  
59  
60

|      |       |      |      |      |      |      |      |      |
|------|-------|------|------|------|------|------|------|------|
| 6.54 | 9.34  | 5.37 | 7.49 | 7.16 | 7.9  | 4.25 | 8.68 | 7.65 |
| 7.59 | 9.55  | 6.42 | 7.84 | 6.91 | 7.93 | 5.74 | 7.37 | 6.62 |
| 7.65 | 8.79  | 6.05 | 7.85 | 6.74 | 8.31 | 5.49 | 7.16 | 6.91 |
| 7.35 | 8.9   | 6.37 | 7.94 | 7.19 | 8.46 | 5.81 | 7.29 | 6.51 |
| 7.48 | 9.74  | 6.72 | 7.01 | 5.01 | 4.88 | 4.72 | 8.14 | 3.55 |
| 7.59 | 8.88  | 6.55 | 7.72 | 7.66 | 7.36 | 5.42 | 6.28 | 7.75 |
| 7.13 | 8.76  | 5.97 | 7.38 | 7.56 | 8.17 | 6.2  | 5.64 | 7.61 |
| 7.17 | 8.89  | 6.11 | 7.28 | 7.43 | 8.04 | 6.15 | 5.52 | 7.56 |
| 7.74 | 8.33  | 7.26 | 7.23 | 6.48 | 0.27 | 1.27 | 7.66 | 0.27 |
| 7.49 | 8.73  | 6.85 | 7.55 | 7.03 | 7.51 | 3.96 | 7.41 | 6.12 |
| 7.52 | 9.25  | 6.66 | 7.9  | 7.52 | 9.01 | 5.41 | 5.88 | 8.09 |
| 7.62 | 9.12  | 6.53 | 7.67 | 7.59 | 8.73 | 4.7  | 7.47 | 7.43 |
| 7.49 | 9.58  | 6.64 | 7.75 | 7.42 | 8.75 | 5.95 | 7.65 | 7.51 |
| 7.62 | 8.92  | 6.76 | 7.93 | 7.68 | 8.35 | 4.98 | 7.2  | 7.78 |
| 7.35 | 12.42 | 6.35 | 6.35 | 5.13 | 8.94 | 8.07 | 7.07 | 6.63 |
| 7    | 9.56  | 6.96 | 7.41 | 8.48 | 9.45 | 5.19 | 6.57 | 7.61 |
| 7.29 | 8.7   | 6.81 | 7.15 | 7.45 | 8.12 | 4.82 | 6.9  | 7.01 |
| 7.06 | 9.78  | 7.01 | 7.43 | 8.2  | 9.61 | 6.26 | 6.37 | 7.65 |

| MED23 | MEG3 | MEOX2 | MET  | MFAP4 | MGAT5 | MGP   | MISP  | MMP1  |
|-------|------|-------|------|-------|-------|-------|-------|-------|
| 6.64  | 6.23 | 7.32  | 6.3  | 8.31  | 8.07  | 10.87 | 8.44  | 7.38  |
| 6.64  | 6.51 | 6.59  | 7.13 | 9.27  | 9     | 9.53  | 9.96  | 9.68  |
| 6.01  | 6.92 | 6.47  | 7.06 | 9.39  | 8.52  | 8.84  | 9.34  | 9.54  |
| 7.1   | 8.26 | 5.76  | 6.91 | 11.55 | 8.75  | 11.69 | 9.95  | 10.87 |
| 2.59  | 6.26 | 8.7   | 7.5  | 7.87  | 7.88  | 7.71  | 9.02  | 9.34  |
| 6.87  | 6.62 | 7.01  | 6.91 | 9.19  | 7.76  | 9.28  | 9.3   | 7.74  |
| 6.58  | 6.78 | 6.84  | 6.78 | 8.76  | 7.88  | 8.95  | 9.12  | 9.11  |
| 6.73  | 7.84 | 4.92  | 7.04 | 9.99  | 7.69  | 9.94  | 10.38 | 8.47  |
| 6.72  | 7.15 | 4.54  | 7    | 8.68  | 8.59  | 11.37 | 9.35  | 10.99 |
| 7.21  | 6.54 | 6.04  | 8.08 | 7.79  | 8.84  | 9.18  | 9.97  | 9.86  |
| 7.61  | 7.23 | 3.7   | 8.19 | 9.15  | 8.82  | 9.08  | 10.31 | 10.35 |
| 7.65  | 7.7  | 6.3   | 7.93 | 9.85  | 8.91  | 11.24 | 9.99  | 11.21 |
| 7.3   | 6.42 | 6.81  | 7.73 | 8.77  | 8.56  | 9.47  | 10.79 | 8.82  |
| 7.14  | 7.76 | 7.41  | 7.76 | 9.13  | 8.5   | 9.06  | 10.1  | 9.63  |
| 6.09  | 8.77 | 6.63  | 8.98 | 10.87 | 8.38  | 10.83 | 9.98  | 3.35  |
| 7.15  | 6.9  | 7.09  | 7.93 | 8.55  | 8.71  | 11.07 | 8.7   | 7.74  |
| 6.9   | 7.56 | 6.81  | 7.83 | 9.96  | 8.66  | 10.82 | 9.27  | 8.08  |
| 6.43  | 8.07 | 7.56  | 7.93 | 9.98  | 8.41  | 11.03 | 9.21  | 8.07  |
| 7.63  | 7.98 | 6.93  | 6.67 | 9.62  | 8.9   | 10.63 | 10.7  | 8.24  |
| 8.02  | 7.11 | 5.04  | 7.25 | 9.61  | 8.86  | 11.05 | 10.5  | 8.58  |
| 7.78  | 7.43 | 6.89  | 6.66 | 9.91  | 8.34  | 11.94 | 9.9   | 7.11  |
| 8.13  | 8.34 | 6.49  | 8.38 | 11    | 8.95  | 11.76 | 10.63 | 7.81  |
| 7.97  | 8.05 | 5.24  | 8.59 | 11.14 | 9.19  | 10.03 | 10.69 | 8.48  |
| 8     | 8.49 | 6.95  | 8.35 | 11.28 | 8.87  | 12.56 | 10.15 | 5.51  |
| 6.93  | 7.84 | 4.67  | 5.95 | 7.84  | 7.99  | 10    | 5.6   | 4.82  |
| 7.4   | 5.77 | 2.71  | 7.33 | 7.91  | 8.72  | 8.6   | 11.31 | 7.71  |
| 7.31  | 5.77 | 3.33  | 7.38 | 8.15  | 8.71  | 8.71  | 11.18 | 7.35  |
| 6.71  | 6.54 | 6.81  | 6.96 | 9     | 8.33  | 9.08  | 10.4  | 7.75  |
| 6.86  | 5.89 | 6.88  | 8.31 | 7.67  | 8.36  | 9.45  | 10.04 | 8.49  |
| 6.69  | 6.02 | 6.63  | 7.99 | 8.74  | 8.43  | 10.74 | 9.66  | 10.03 |
| 7.02  | 5.44 | 6.67  | 8.16 | 8.45  | 8.46  | 10.08 | 9.73  | 9.45  |
| 6.17  | 6.59 | 7.55  | 8.18 | 8.46  | 8.26  | 10.32 | 9.96  | 8.84  |
| 7.37  | 5.47 | 7.32  | 6.31 | 7.85  | 9.21  | 8.57  | 6.86  | 7.57  |
| 7.28  | 8.18 | 7.52  | 5.61 | 9.66  | 8.29  | 12.6  | 9.82  | 9.29  |
| 7.48  | 7.51 | 4.47  | 6.46 | 8.71  | 8.88  | 10.36 | 10.68 | 10.88 |
| 7.16  | 8.13 | 7.29  | 6.06 | 10.18 | 8.47  | 12.35 | 10.17 | 7.93  |
| 6.53  | 5.03 | 4.69  | 9.05 | 8.41  | 7.55  | 8.64  | 7.38  | 2.77  |
| 6.97  | 6.32 | 3.57  | 8.27 | 8.47  | 7.08  | 7.98  | 9.02  | 10.25 |
| 6.78  | 7.2  | 4.89  | 6.86 | 9.53  | 7     | 9.36  | 7.7   | 8.3   |
| 6.6   | 6.86 | 5.42  | 7.49 | 9.31  | 6.95  | 9.68  | 7.6   | 5.17  |
| 5.44  | 6.33 | 7.07  | 6.28 | 7.61  | 7.35  | 8.96  | 8.37  | 7.32  |
| 5.25  | 6.68 | 7.15  | 6.95 | 8.42  | 7.29  | 8.67  | 8.51  | 7.78  |
| 5.03  | 6.31 | 7.03  | 6.88 | 8.22  | 7.22  | 8.14  | 8.11  | 8.08  |
| 5.54  | 6.66 | 6.27  | 6.89 | 8.13  | 7.23  | 7.63  | 8.88  | 7.64  |
| 5.86  | 7.5  | 5.45  | 6.86 | 8.95  | 5.45  | 8.29  | 10.96 | 5.18  |
| 7.61  | 6.99 | 4.56  | 7.04 | 10    | 7.86  | 10.35 | 10.18 | 7.23  |
| 7.9   | 7.74 | 6.36  | 7.36 | 9.83  | 7.54  | 11.46 | 10.6  | 8.49  |
| 7.7   | 8.6  | 8.01  | 6.88 | 10.63 | 7.32  | 12.38 | 9.85  | 8.03  |
| 7.49  | 7.48 | 6.47  | 8.98 | 9.32  | 8.7   | 11.49 | 10.02 | 8.05  |
| 7.8   | 7.59 | 5.87  | 9.18 | 8.66  | 8.64  | 10.48 | 9.96  | 8.65  |
| 7.93  | 6.95 | 5.2   | 9.07 | 9.38  | 8.37  | 9.21  | 10.05 | 7.6   |

<https://mc.manuscriptcentral.com/gut>

|    |      |      |      |       |       |      |       |       |       |
|----|------|------|------|-------|-------|------|-------|-------|-------|
| 1  |      |      |      |       |       |      |       |       |       |
| 2  | 8.05 | 8.01 | 6.31 | 8.88  | 9.57  | 8.37 | 11.04 | 9.54  | 6.27  |
| 3  | 7.71 | 6.01 | 6.74 | 8.03  | 7.97  | 9.18 | 10.27 | 10.06 | 7.27  |
| 4  | 7.79 | 6.74 | 6.23 | 8.33  | 8.54  | 9.69 | 9.88  | 9.79  | 9.23  |
| 5  | 7.77 | 6.26 | 6.22 | 8.17  | 8.58  | 9.73 | 9.31  | 9.94  | 9.34  |
| 6  | 7.54 | 6.39 | 6.76 | 8.2   | 8.98  | 9.59 | 11.13 | 9.75  | 7.08  |
| 7  | 7.52 | 5.62 | 5.9  | 12    | 8.51  | 9.7  | 10.97 | 9.59  | 5.69  |
| 8  | 7.39 | 6.57 | 2.83 | 13.18 | 9.49  | 9.14 | 10.84 | 9.97  | 6.67  |
| 9  | 7.36 | 5.82 | 2.59 | 13.48 | 7.28  | 9.36 | 9.11  | 10.35 | 7.27  |
| 10 | 7.47 | 6.59 | 5.35 | 13.53 | 9.82  | 9    | 12.17 | 10.28 | 6.74  |
| 11 | 7.6  | 5.69 | 5.42 | 8.28  | 6.75  | 8.19 | 10.55 | 9.11  | 3.83  |
| 12 | 7.45 | 6.4  | 2.13 | 7.94  | 8.81  | 8.77 | 10.1  | 9.47  | 9.69  |
| 13 | 7.32 | 6.16 | 2.62 | 8.08  | 7.58  | 8.56 | 9.77  | 9.55  | 9.33  |
| 14 | 7.45 | 6.59 | 4.07 | 7.93  | 8.88  | 8.62 | 11.17 | 9.49  | 6.52  |
| 15 | 7.15 | 7.47 | 6.74 | 5.15  | 6.15  | 5.15 | 7.74  | 10.06 | 12.05 |
| 16 | 5.49 | 7.15 | 7.84 | 8.83  | 8.95  | 7.48 | 7.39  | 10.17 | 12.03 |
| 17 | 5.62 | 6.78 | 8.14 | 8.7   | 8.66  | 7.81 | 8.19  | 9.5   | 11.41 |
| 18 | 2.57 | 7.64 | 9.42 | 8.28  | 8.88  | 8.21 | 8.38  | 10.46 | 10.91 |
| 19 | 3.1  | 6.94 | 9.23 | 8.2   | 8.63  | 8.48 | 7.99  | 10.06 | 10.72 |
| 20 | 7.47 | 5.84 | 6.57 | 9.41  | 6.81  | 8.87 | 6.93  | 9.86  | 12.13 |
| 21 | 7.64 | 5.24 | 6.5  | 9.63  | 6.05  | 8.92 | 6.5   | 10.18 | 12.63 |
| 22 | 7.06 | 6.12 | 6.79 | 9.23  | 7.79  | 8.52 | 8.16  | 9.89  | 12.42 |
| 23 | 8    | 7.27 | 5.71 | 8.5   | 10.41 | 9.08 | 12.51 | 11.07 | 6.83  |
| 24 | 7.88 | 6.62 | 6.91 | 8.19  | 10.07 | 8.96 | 12.21 | 10.71 | 6.37  |
| 25 | 7.87 | 6.75 | 8.37 | 8.13  | 9.5   | 9.12 | 12.47 | 9.97  | 7.62  |
| 26 | 8.46 | 7.61 | 4.44 | 7.99  | 9.98  | 9.12 | 9.29  | 10.8  | 8.41  |
| 27 | 8.15 | 8.22 | 4.36 | 7.58  | 10.39 | 8.87 | 10.22 | 11.1  | 9.82  |
| 28 | 8.1  | 8.53 | 5.45 | 6.71  | 11.35 | 9.09 | 10.33 | 11.06 | 11.19 |
| 29 | 7.41 | 7.02 | 6.72 | 8.4   | 8.08  | 8.72 | 8.25  | 9.02  | 11.1  |
| 30 | 7.75 | 7.15 | 6.71 | 8.6   | 8.12  | 8.42 | 9.28  | 8.93  | 10.58 |
| 31 | 7.22 | 6.72 | 6.72 | 8.44  | 8.5   | 8.36 | 9.56  | 8.96  | 8.86  |
| 32 | 7.3  | 7.44 | 8.2  | 8.71  | 8.95  | 9.53 | 11.6  | 10.29 | 9.49  |
| 33 | 7.41 | 5.95 | 7.15 | 8.73  | 8.38  | 9.72 | 9.15  | 10.64 | 9.79  |
| 34 | 6.97 | 5.94 | 7.66 | 8.73  | 8.27  | 9.44 | 8.58  | 11.01 | 9.74  |
| 35 | 7.15 | 7.02 | 7.21 | 8.44  | 9.34  | 8.1  | 10.58 | 9.71  | 8.67  |
| 36 | 7    | 7.02 | 7.19 | 8.39  | 9.17  | 8.59 | 9.35  | 9.79  | 10.72 |
| 37 | 7.09 | 8.34 | 7.36 | 8.14  | 9.46  | 8.21 | 10.76 | 9.62  | 10.67 |
| 38 | 6.63 | 7.04 | 7.51 | 6.83  | 8.79  | 8.52 | 11.64 | 8.7   | 7.9   |
| 39 | 6.63 | 7.04 | 7.51 | 6.83  | 8.79  | 8.52 | 11.64 | 8.7   | 7.9   |
| 40 | 6.32 | 6.76 | 7.55 | 7.92  | 10.24 | 8.23 | 11.25 | 9.8   | 7.68  |
| 41 | 6.29 | 7.42 | 7.49 | 7.64  | 10.43 | 8.3  | 11.77 | 9.66  | 8.02  |
| 42 | 6.21 | 8.15 | 8.05 | 7.6   | 9.87  | 8.34 | 12.62 | 9.37  | 7.72  |
| 43 | 6.31 | 5.95 | 8.23 | 7.14  | 8.26  | 8.34 | 8.46  | 8.08  | 8.01  |
| 44 | 6.55 | 6.67 | 7.18 | 7.04  | 9.29  | 8.28 | 10.76 | 8.72  | 9.97  |
| 45 | 6.77 | 6.61 | 7.19 | 7.35  | 8.69  | 8.28 | 9.42  | 9.48  | 9.88  |
| 46 | 6.28 | 7.33 | 8.17 | 7.07  | 9.77  | 8.23 | 10.77 | 8.85  | 8.22  |
| 47 | 7.19 | 7.51 | 6.47 | 7.68  | 9.2   | 9.07 | 10.98 | 10.46 | 9.91  |
| 48 | 7.29 | 6.57 | 4.4  | 7.99  | 8.33  | 8.99 | 8.35  | 11.07 | 10.84 |
| 49 | 6.87 | 7.77 | 6.25 | 7.48  | 9.42  | 8.55 | 9.6   | 10.53 | 9.66  |
| 50 | 6.2  | 6.11 | 8.04 | 7.49  | 8.31  | 8.54 | 10.51 | 8.94  | 8.51  |
| 51 | 5.57 | 7.69 | 8.07 | 7.42  | 10.52 | 8.15 | 12.24 | 9.26  | 9.51  |
| 52 | 5.78 | 7.31 | 8.18 | 7.56  | 10.26 | 8.19 | 12.45 | 9.5   | 9.7   |
| 53 | 6.46 | 6.55 | 7.56 | 7.88  | 8.84  | 7.55 | 8.68  | 9.02  | 7.45  |

<https://mc.manuscriptcentral.com/gut>

## Gut

|    |      |      |      |      |       |      |       |       |       |
|----|------|------|------|------|-------|------|-------|-------|-------|
| 1  |      |      |      |      |       |      |       |       |       |
| 2  | 6.4  | 6.8  | 7.25 | 7.91 | 8.68  | 7.67 | 9.23  | 8.95  | 8.14  |
| 3  | 4.17 | 7.7  | 8.32 | 8.01 | 9.51  | 7.84 | 9.51  | 8.95  | 8.67  |
| 4  | 7.93 | 5.97 | 6.89 | 6.22 | 9.57  | 8.91 | 11.06 | 8.86  | 6.55  |
| 5  | 7.58 | 8.01 | 6.12 | 7.47 | 10.93 | 8.26 | 11.06 | 8.63  | 12.47 |
| 6  | 7.48 | 8.93 | 6.3  | 7.1  | 11.49 | 8.37 | 12.58 | 8.58  | 8.38  |
| 7  | 6.98 | 7.17 | 5.99 | 8.1  | 9.95  | 8.23 | 11.58 | 8.93  | 4.93  |
| 8  | 7.32 | 7.03 | 4.83 | 8.29 | 8.14  | 9.4  | 9.16  | 9.01  | 11.37 |
| 9  | 7.39 | 7.18 | 5.54 | 8.72 | 8.87  | 9.34 | 9.9   | 9.58  | 11    |
| 10 | 6.2  | 8.54 | 6.08 | 9.17 | 11.31 | 8.05 | 10.74 | 10.2  | 8.14  |
| 11 | 7.04 | 6.52 | 5.84 | 7.72 | 8.74  | 8.16 | 9.58  | 10.51 | 3.96  |
| 12 | 6.95 | 6.25 | 3.08 | 8.32 | 8.61  | 8.11 | 9.67  | 10.12 | 7.98  |
| 13 | 6.43 | 5.56 | 6.82 | 7.72 | 7.65  | 7.93 | 8.46  | 9.58  | 7.76  |
| 14 | 5.58 | 8.88 | 5.72 | 7.99 | 10.22 | 7.78 | 10.07 | 10.62 | 7.02  |
| 15 | 2.66 | 6.17 | 9.07 | 7.5  | 8.48  | 8.73 | 8.04  | 8.74  | 9.43  |
| 16 | 7.67 | 6.66 | 5.73 | 6.7  | 7.17  | 9.03 | 9.62  | 10.03 | 9.91  |
| 17 | 7.4  | 6.24 | 3.29 | 6.75 | 7.37  | 9.23 | 8.38  | 10.01 | 9.28  |
| 18 | 7.48 | 6.66 | 5.63 | 6.78 | 8.29  | 9    | 10.58 | 10.12 | 6.55  |
| 19 | 7.77 | 7.11 | 3.68 | 9.74 | 9.38  | 8.11 | 8.72  | 9.84  | 8.55  |
| 20 | 6.93 | 6.97 | 6.36 | 8.99 | 8.58  | 7.42 | 8.34  | 8.59  | 8.41  |
| 21 | 7.43 | 6.78 | 5.28 | 9.2  | 8.39  | 7.54 | 9.31  | 8.5   | 7.83  |
| 22 | 6.16 | 8.33 | 5.16 | 7.16 | 9.75  | 7.16 | 7.75  | 9.25  | 9.75  |
| 23 | 7.26 | 5.46 | 2.3  | 8.83 | 7.82  | 8.76 | 7.76  | 9.58  | 9.29  |
| 24 | 6.89 | 6.74 | 4.62 | 8.27 | 9.15  | 8.63 | 9.02  | 9.33  | 7.98  |
| 25 | 6.43 | 6.77 | 4.5  | 7.06 | 10.53 | 7.72 | 10.8  | 9.79  | 7.33  |
| 26 | 6.33 | 8.37 | 4.99 | 7.51 | 11.07 | 8.1  | 10.93 | 9.58  | 6.37  |
| 27 | 7.05 | 8.96 | 7.02 | 6.42 | 10.23 | 7.86 | 12.66 | 8.82  | 4.79  |
| 28 | 2.58 | 5.24 | 8.36 | 7.44 | 8.47  | 8.09 | 7.24  | 8.72  | 8.47  |
| 29 | 1.86 | 5.61 | 8.43 | 7.44 | 8.12  | 8.16 | 7.75  | 8.75  | 8.67  |
| 30 | 3.35 | 5.67 | 8.19 | 6.72 | 7.79  | 7.79 | 7.5   | 8.43  | 8.72  |
| 31 | 5.94 | 6.64 | 7.08 | 6.01 | 8.99  | 8.17 | 12.48 | 7.98  | 6.9   |
| 32 | 6.49 | 8.01 | 6.86 | 5.15 | 11.07 | 7.86 | 12.52 | 7.59  | 9.89  |
| 33 | 5.81 | 7.62 | 5.78 | 6.52 | 10.46 | 8.54 | 12.01 | 8.77  | 8.19  |
| 34 | 6.24 | 8.47 | 7.93 | 5.88 | 10.47 | 7.75 | 13.49 | 7.56  | 7.9   |
| 35 | 1.45 | 5.62 | 7.83 | 6.83 | 7.31  | 7.33 | 7.12  | 7.72  | 8.33  |
| 36 | 2.25 | 5.06 | 7.49 | 6.95 | 6.92  | 7.38 | 6.48  | 7.79  | 7.82  |
| 37 | 2.93 | 4.74 | 7.21 | 6.71 | 6.96  | 6.98 | 6.59  | 7.71  | 7.5   |
| 38 | 0.32 | 5.77 | 8.4  | 7.54 | 7.21  | 7.74 | 7.22  | 8.53  | 9.23  |
| 39 | 1.34 | 5.34 | 7.73 | 6.83 | 6.76  | 7.36 | 6.89  | 7.89  | 7.64  |
| 40 | 1.1  | 5.18 | 7.96 | 6.35 | 7.6   | 7.36 | 6.77  | 7.84  | 7.64  |
| 41 | 1.31 | 5.12 | 7.85 | 6.95 | 8.12  | 7.02 | 6.42  | 7.82  | 7.71  |
| 42 | 3.41 | 6.41 | 8.19 | 7.37 | 7.54  | 7.41 | 5.87  | 9.33  | 10.95 |
| 43 | 3.38 | 5.81 | 8.3  | 8.45 | 8.18  | 7.94 | 7.71  | 8.68  | 8.51  |
| 44 | 2.65 | 6.18 | 8.59 | 7.73 | 8.49  | 8.39 | 7.72  | 9.03  | 9.02  |
| 45 | 4.95 | 5.39 | 7.22 | 6.91 | 7.92  | 7.45 | 7.06  | 9.04  | 8     |
| 46 | 3.45 | 6.02 | 8.34 | 7.52 | 7.78  | 7.85 | 7.46  | 8.66  | 8.61  |
| 47 | 5.03 | 5.93 | 8.01 | 7.07 | 8.75  | 7.8  | 9.98  | 9.12  | 8.92  |
| 48 | 3.3  | 5.62 | 8.91 | 7.25 | 8.84  | 7.99 | 7.61  | 8.73  | 8.53  |
| 49 | 2.29 | 5.66 | 8.94 | 7.41 | 8.17  | 8.23 | 7.61  | 8.58  | 8.85  |
| 50 | 2.9  | 6.5  | 9.31 | 8.12 | 8.66  | 8.16 | 7.96  | 8.83  | 9.33  |
| 51 | 6.4  | 5.64 | 7.12 | 7.79 | 7.74  | 8.99 | 10.72 | 9.31  | 7.04  |
| 52 | 6.24 | 6.22 | 6.56 | 7.96 | 6.63  | 9.33 | 9.36  | 9.62  | 7.8   |
| 53 | 6.17 | 6.06 | 6.92 | 7.67 | 7.62  | 9.25 | 10.07 | 9.43  | 7.72  |

<https://mc.manuscriptcentral.com/gut>

1  
2  
3  
4  
5  
6  
7  
8  
9  
10  
11  
12  
13  
14  
15  
16  
17  
18  
19  
20  
21  
22  
23  
24  
25  
26  
27  
28  
29  
30  
31  
32  
33  
34  
35  
36  
37  
38  
39  
40  
41  
42  
43  
44  
45  
46  
47  
48  
49  
50  
51  
52  
53  
54  
55  
56  
57  
58  
59  
60

|      |      |      |      |       |      |       |       |       |
|------|------|------|------|-------|------|-------|-------|-------|
| 6.1  | 5.88 | 6.98 | 7.8  | 7.52  | 9.33 | 10.94 | 9.58  | 7.2   |
| 7.59 | 7.53 | 6.93 | 8.02 | 8.79  | 8.43 | 10.87 | 10.82 | 6.91  |
| 7.35 | 8.41 | 6.77 | 7.82 | 9.59  | 8.64 | 9.56  | 10.61 | 9.33  |
| 7.6  | 7.15 | 7.08 | 8.18 | 7.94  | 8.59 | 9.1   | 11.5  | 7.64  |
| 7.48 | 6.89 | 6.62 | 8.16 | 7.84  | 8.46 | 8.87  | 11.55 | 7.81  |
| 7.04 | 7.35 | 7.67 | 7.53 | 8.8   | 8.81 | 11.32 | 10.11 | 8.08  |
| 7.09 | 8.21 | 6.43 | 8.4  | 11.02 | 8.82 | 11.7  | 12.03 | 9.2   |
| 7.46 | 7.26 | 5.84 | 8.4  | 10.41 | 9.03 | 11.37 | 11.81 | 9.61  |
| 6.99 | 9.23 | 7.88 | 7.68 | 11.89 | 8.67 | 12.69 | 11.36 | 6.44  |
| 7.24 | 7.57 | 5.81 | 7.71 | 7.97  | 8.78 | 11.27 | 9.19  | 6.89  |
| 7.81 | 7.61 | 6.34 | 8.47 | 9.96  | 8.95 | 11.99 | 9.74  | 7.31  |
| 7.72 | 8.26 | 6.17 | 8.4  | 9.84  | 8.88 | 11.58 | 10.18 | 11.4  |
| 7.72 | 7.43 | 6.35 | 8.65 | 9.98  | 9.06 | 12    | 9.91  | 6.6   |
| 7.11 | 4.8  | 6.59 | 7.59 | 7.97  | 8.18 | 10.55 | 9.34  | 6.47  |
| 7.75 | 6.33 | 4.15 | 7.76 | 9.41  | 8.36 | 10.57 | 9.65  | 7.1   |
| 6.45 | 8.05 | 7.34 | 7.42 | 11.21 | 7.75 | 12.3  | 8.65  | 6.94  |
| 7.44 | 7.51 | 8.08 | 6.96 | 9.55  | 8.57 | 11.95 | 8.76  | 2.8   |
| 7.8  | 7.55 | 5.84 | 7.64 | 10.33 | 8.88 | 10.61 | 10.08 | 7.67  |
| 7.57 | 8.07 | 7.01 | 7.34 | 10.98 | 8.29 | 11.87 | 9.48  | 5.8   |
| 7.47 | 6.85 | 6.12 | 7.18 | 9.37  | 8.54 | 12.2  | 9.53  | 3.93  |
| 7.56 | 8    | 4.54 | 7.74 | 9.91  | 8.77 | 9.35  | 10.63 | 12.05 |
| 7.51 | 6.51 | 3.39 | 7.75 | 8.63  | 8.88 | 8.83  | 10.34 | 8.91  |
| 6.66 | 6.91 | 6.11 | 7.26 | 10.22 | 7.28 | 11.12 | 8.51  | 8.13  |
| 7.3  | 7.27 | 5.93 | 7.04 | 9.58  | 7.21 | 10.39 | 8.05  | 7.72  |
| 5.74 | 9.06 | 6.96 | 6.74 | 12.33 | 6.15 | 11.55 | 9.36  | 9.47  |
| 6.61 | 4.89 | 5.61 | 5.41 | 8.19  | 7.57 | 9.74  | 7.63  | 2.68  |
| 6.77 | 6.77 | 5.18 | 5.92 | 9.69  | 7.23 | 9.71  | 8.42  | 7.31  |
| 7.12 | 6.03 | 3.93 | 6.26 | 8.03  | 7.47 | 8.58  | 9.43  | 7.24  |
| 7.45 | 7.36 | 5.36 | 5.71 | 10.41 | 7.42 | 10.98 | 9.44  | 6.71  |
| 1.76 | 5.76 | 7.34 | 6.22 | 7.04  | 6.71 | 6.71  | 7.71  | 7.97  |
| 3.04 | 6.11 | 7.39 | 6.27 | 7.71  | 6.93 | 6.67  | 8.26  | 7.71  |
| 1.88 | 5.13 | 7.96 | 6.64 | 7.05  | 7.15 | 6.61  | 7.67  | 8.11  |
| 0.96 | 5.48 | 7.4  | 6.76 | 7.42  | 6.93 | 6.66  | 7.6   | 7.74  |
| 5.68 | 4.4  | 6.18 | 6.09 | 6.68  | 7.17 | 8.61  | 8.4   | 6.5   |
| 5.02 | 5.71 | 6.52 | 6.44 | 8.57  | 7.04 | 8.96  | 7.46  | 7.4   |
| 5.55 | 6.01 | 6.69 | 6.24 | 8.54  | 6.94 | 10.34 | 7.43  | 7.39  |
| 5.4  | 7.21 | 6.8  | 6.24 | 8.94  | 6.79 | 10.94 | 7.5   | 7.13  |
| 7.8  | 3.68 | 6.94 | 3.52 | 8.82  | 9.83 | 9.09  | 2.35  | 2.94  |
| 7.37 | 6.46 | 5.46 | 7.16 | 10.19 | 8.19 | 10.46 | 11.03 | 7.57  |
| 7.05 | 6.44 | 3.42 | 8.51 | 8.93  | 8.79 | 8.88  | 10.47 | 8.38  |
| 6.04 | 8.28 | 3.23 | 8.38 | 10.81 | 8.38 | 8.57  | 10.36 | 7.23  |
| 7.41 | 5.86 | 6.31 | 7.44 | 8.4   | 8.5  | 10.78 | 9.64  | 8.17  |
| 5.51 | 9.21 | 6.51 | 7.97 | 11.39 | 7.97 | 8.51  | 10.34 | 8.1   |
| 7.65 | 7.62 | 5.42 | 8.32 | 10.45 | 8.48 | 11.02 | 9.74  | 8.02  |
| 7.56 | 8.01 | 6.26 | 8.54 | 10.05 | 8.14 | 11.31 | 8.98  | 7.3   |
| 8.35 | 3    | 3.85 | 7.84 | 6.95  | 7.82 | 5.93  | 12.06 | 9.02  |
| 7.32 | 6.88 | 6.48 | 7.2  | 9.56  | 7.33 | 10.99 | 11.11 | 10.04 |
| 7.59 | 6.74 | 5.86 | 7.34 | 9.56  | 7.85 | 10.51 | 11    | 10.12 |
| 6.83 | 6.61 | 6.61 | 7.08 | 9.45  | 7.69 | 10.44 | 10.42 | 9.8   |
| 6.41 | 6.94 | 5.62 | 5.64 | 8.42  | 8.09 | 11    | 6.26  | 2.89  |
| 6.34 | 6.94 | 6.17 | 5.85 | 9.21  | 7.77 | 11.45 | 6.51  | 7.11  |
| 5.88 | 7.14 | 5.98 | 5.72 | 9.28  | 7.55 | 11.2  | 6.73  | 7.74  |

1  
2  
3  
4  
5  
6  
7  
8  
9  
10  
11  
12  
13  
14  
15  
16  
17  
18  
19  
20  
21  
22  
23  
24  
25  
26  
27  
28  
29  
30  
31  
32  
33  
34  
35  
36  
37  
38  
39  
40  
41  
42  
43  
44  
45  
46  
47  
48  
49  
50  
51  
52  
53  
54  
55  
56  
57  
58  
59  
60

|      |      |      |      |       |      |       |       |      |
|------|------|------|------|-------|------|-------|-------|------|
| 6.15 | 7.78 | 6.28 | 5.88 | 10.25 | 7.61 | 11.63 | 5.54  | 0.79 |
| 5.85 | 7.27 | 7.14 | 5.68 | 9.43  | 6.77 | 12.11 | 3.42  | 6.85 |
| 5.94 | 6.31 | 4.67 | 6.08 | 8.42  | 6.65 | 9     | 0.59  | 9.88 |
| 6.35 | 6.53 | 4.95 | 5.7  | 8.38  | 6.74 | 8.76  | 3.49  | 7.52 |
| 1.55 | 6.08 | 7.46 | 6.01 | 9.25  | 7.39 | 7.51  | 6.51  | 8.64 |
| 6.72 | 6.19 | 5.15 | 7.18 | 7.79  | 8.86 | 10.7  | 9.85  | 4.27 |
| 6.73 | 4.49 | 4.15 | 7.55 | 5.68  | 9.19 | 9.21  | 8.47  | 5.41 |
| 6.67 | 4.26 | 4.74 | 7.62 | 5.56  | 9.33 | 8.66  | 8.48  | 5.67 |
| 3.08 | 5.52 | 8.32 | 6.92 | 7.33  | 7.9  | 6.94  | 8.3   | 8.47 |
| 5.5  | 6.61 | 7.44 | 6.79 | 9.12  | 7.91 | 9.49  | 7.77  | 7.97 |
| 7.12 | 6.27 | 6.39 | 6.77 | 9.7   | 8.75 | 12.12 | 8.68  | 5.97 |
| 6.82 | 7.25 | 7.26 | 7.26 | 10.04 | 8.25 | 11.81 | 8.58  | 8.36 |
| 6.49 | 7.52 | 7.12 | 6.96 | 10.99 | 8.35 | 12.04 | 8.76  | 7.08 |
| 6.87 | 8.42 | 8.13 | 6.63 | 10.62 | 7.83 | 13.77 | 7.67  | 6.41 |
| 2.54 | 8.32 | 4.54 | 7.13 | 9.26  | 7.5  | 8.87  | 11.15 | 9.59 |
| 6.65 | 6.77 | 5.05 | 6.23 | 8.54  | 7.24 | 9.19  | 7.72  | 7.81 |
| 6.31 | 6.08 | 6.2  | 6.32 | 8.44  | 7.59 | 9.01  | 7.98  | 7.64 |
| 6.2  | 6.47 | 4.75 | 6.41 | 8.63  | 7.07 | 9.17  | 8.02  | 7.56 |

1  
2  
3  
4  
5  
6  
7  
8  
9  
10  
11  
12  
13  
14  
15  
16  
17  
18  
19  
20  
21  
22  
23  
24  
25  
26  
27  
28  
29  
30  
31  
32  
33  
34  
35  
36  
37  
38  
39  
40  
41  
42  
43  
44  
45  
46  
47  
48  
49  
50  
51  
52  
53  
54  
55  
56  
57  
58  
59  
60

| MMP10 | MMP12 | MMP13 | MMP14 | MMP17 | MMP2  | MMP24 | MMP3  | MMP9  |
|-------|-------|-------|-------|-------|-------|-------|-------|-------|
| 0     | 5.69  | 6.46  | 7.56  | 7.23  | 8.1   | 2.88  | 6.37  | 8.66  |
| 5.36  | 10.42 | 5.84  | 8.16  | 6.42  | 8.94  | 1.84  | 8.51  | 9.77  |
| 5.33  | 9.08  | 6.11  | 7.95  | 6.7   | 8.57  | 0.08  | 7.68  | 8.66  |
| 6.35  | 9.34  | 2.5   | 9.05  | 5.82  | 10.43 | 3.5   | 10.98 | 9.12  |
| 1.01  | 1.01  | 8.29  | 3.33  | 7.84  | 7.84  | 2.01  | 8.17  | 8.52  |
| 2.3   | 7.11  | 5.88  | 8.71  | 6.51  | 10.04 | 2.66  | 6.69  | 8.47  |
| 2.92  | 7.74  | 6.03  | 8.81  | 6.22  | 9.78  | 1.5   | 7.73  | 9.12  |
| 2.98  | 7.42  | 2.98  | 9.53  | 5.2   | 9.9   | 3.56  | 6.12  | 9.2   |
| 0.37  | 6.5   | 3.17  | 9.35  | 4.07  | 7.22  | 3.17  | 3.17  | 7.6   |
| 2.23  | 7.01  | 6.54  | 8.92  | 6.57  | 8.72  | 2.49  | 6.84  | 9.66  |
| 2.7   | 7.86  | 2.96  | 9.35  | 3.96  | 8.82  | 3.38  | 5.96  | 9.48  |
| 3.85  | 9.58  | 3.27  | 9.88  | 4.85  | 9.69  | 3.68  | 6.14  | 9.68  |
| 2.99  | 7.59  | 6.16  | 8.73  | 7.15  | 9.55  | 1.77  | 7.74  | 8.45  |
| 3.58  | 8.94  | 6.59  | 9.58  | 7.32  | 11.18 | 2.26  | 7.95  | 9.48  |
| 2.77  | 6.52  | 4.35  | 9.66  | 6.47  | 9.19  | 3.35  | 3.35  | 11.8  |
| 3.26  | 8.21  | 6.3   | 8.9   | 7.51  | 8.25  | 1.94  | 6.56  | 10.34 |
| 3.29  | 7.17  | 6.99  | 9.69  | 7.42  | 10.01 | 3.29  | 6.96  | 8.66  |
| 2.35  | 7.25  | 6.97  | 9.78  | 7.69  | 9.96  | 2.35  | 6.54  | 9.72  |
| 1.48  | 6.48  | 1.48  | 9.3   | 6.76  | 8.57  | 3.07  | 2.9   | 10.25 |
| 3.12  | 8.66  | 1.63  | 9.43  | 3.63  | 10.29 | 1.89  | 7.39  | 8.88  |
| 2.31  | 7.72  | 2.31  | 9.16  | 5.14  | 9.77  | 2.67  | 3.2   | 10.56 |
| 4.54  | 5.96  | 4.79  | 9.28  | 6.32  | 10.66 | 4.06  | 7.43  | 7.06  |
| 6.11  | 6.43  | 5.37  | 8.86  | 6.59  | 10.72 | 4.45  | 8.79  | 6.03  |
| 2.48  | 3.22  | 3.7   | 9.57  | 6.49  | 10.62 | 4.8   | 4.89  | 4.94  |
| 2.43  | 9.31  | 1.43  | 7.77  | 6.6   | 8.03  | 3.43  | 3.75  | 8.64  |
| 2.94  | 9.66  | 2.45  | 7.65  | 2.94  | 8.59  | 1.71  | 7.42  | 8.15  |
| 2.11  | 8.98  | 3.84  | 7.46  | 4.61  | 8.05  | 3.11  | 5.61  | 7.56  |
| 0.92  | 8.68  | 5.87  | 7.27  | 6.7   | 8.58  | 0.92  | 6.99  | 8.33  |
| 0.7   | 5.34  | 6.43  | 6.7   | 6.83  | 7.01  | 0     | 6.24  | 8.35  |
| 4.86  | 7.23  | 6.58  | 7.81  | 6.84  | 8.6   | 2.09  | 9.45  | 9.2   |
| 2.2   | 5.62  | 6.28  | 7.42  | 6.67  | 8.26  | 0.2   | 8.05  | 7.54  |
| 0.71  | 5.57  | 7.37  | 7.39  | 7.83  | 8.22  | 2.29  | 7.03  | 8.89  |
| 0.35  | 7.2   | 6.88  | 6.3   | 7.47  | 7.31  | 1.35  | 6.22  | 10.22 |
| 4.15  | 7.13  | 2.64  | 9.99  | 5.94  | 9.64  | 3.64  | 7.54  | 9.68  |
| 6.66  | 8.2   | 1.61  | 9.58  | 5.59  | 9.74  | 2.93  | 9.71  | 7.89  |
| 1.47  | 6.58  | 2.47  | 9.81  | 6.23  | 9.94  | 3.06  | 4.06  | 9.3   |
| 0.45  | 8.35  | 2.45  | 7.93  | 4.53  | 5.09  | 0.45  | 2.03  | 10.65 |
| 6.58  | 9.87  | 6.37  | 9.03  | 3.57  | 9.71  | 1.73  | 10.55 | 10.07 |
| 4.61  | 8.82  | 5.17  | 8.76  | 4.45  | 10.08 | 0.37  | 8.95  | 10.27 |
| 2.07  | 8.9   | 3.74  | 8.12  | 4.14  | 9.35  | 0     | 4.74  | 10.3  |
| 0.51  | 6.13  | 6.24  | 8.19  | 6.92  | 7.74  | 1.1   | 6.1   | 8.08  |
| 1.48  | 7.9   | 5.94  | 8.7   | 6.53  | 9.41  | 2.7   | 6.95  | 7.6   |
| 2.22  | 6.03  | 6.54  | 8.04  | 6.73  | 9.09  | 1.22  | 6.99  | 7.48  |
| 1.82  | 6.43  | 5.86  | 9.01  | 5.94  | 9.51  | 1.82  | 6.24  | 6.93  |
| 2.86  | 7.81  | 3.86  | 7.77  | 6.18  | 5.45  | 5.18  | 3.86  | 9.56  |
| 3.31  | 6.87  | 2.9   | 8.21  | 4.71  | 9.26  | 1.9   | 7.42  | 8.08  |
| 5.21  | 8.41  | 2.58  | 8.77  | 4.58  | 10.07 | 2.32  | 8.76  | 9     |
| 3.27  | 6.3   | 2.62  | 9.38  | 5.33  | 10.64 | 2.98  | 6.8   | 9.65  |
| 0.63  | 7.72  | 3.22  | 9.65  | 5.99  | 9.23  | 3.8   | 3.8   | 9.32  |
| 2.59  | 7.3   | 4.92  | 10.31 | 4.82  | 10.41 | 5.26  | 7.23  | 8.82  |
| 3.08  | 6.78  | 2.08  | 9.46  | 4.3   | 9.75  | 6.82  | 8.37  | 6.95  |

## Gut

1  
2  
3  
4  
5  
6  
7  
8  
9  
10  
11  
12  
13  
14  
15  
16  
17  
18  
19  
20  
21  
22  
23  
24  
25  
26  
27  
28  
29  
30  
31  
32  
33  
34  
35  
36  
37  
38  
39  
40  
41  
42  
43  
44  
45  
46  
47  
48  
49  
50  
51  
52  
53  
54  
55  
56  
57  
58  
59  
60

|      |       |      |       |      |       |      |       |       |
|------|-------|------|-------|------|-------|------|-------|-------|
| 2.4  | 5.81  | 3.54 | 10.33 | 4.6  | 10.46 | 5.66 | 4.4   | 7.76  |
| 0.03 | 6.51  | 6.32 | 8.22  | 7.13 | 7.36  | 2.03 | 5.7   | 8.93  |
| 3.89 | 7.84  | 6    | 8.9   | 7.26 | 9.34  | 3    | 8.66  | 10.65 |
| 3.76 | 7.52  | 5.54 | 9.13  | 7.03 | 9.28  | 2.28 | 8.98  | 9.88  |
| 0    | 5.58  | 6.51 | 8.58  | 7.11 | 8.94  | 2.29 | 6.23  | 10.59 |
| 0.23 | 6.42  | 4.93 | 9.18  | 6.09 | 7.31  | 2.23 | 4.32  | 9.69  |
| 1.25 | 6.69  | 4.15 | 9.72  | 4.64 | 9.07  | 2.25 | 4.77  | 6.53  |
| 1.81 | 4.84  | 1    | 9.09  | 3.46 | 7.74  | 1.59 | 6.56  | 5.39  |
| 2.02 | 4.96  | 1.44 | 9.75  | 4.53 | 8.62  | 2.76 | 5.76  | 6.05  |
| 2.58 | 8.96  | 2.39 | 8.12  | 4.04 | 7.13  | 2.17 | 1.17  | 8.39  |
| 5.79 | 9.74  | 2.13 | 8.98  | 4    | 9.16  | 3.13 | 10.13 | 10.15 |
| 5.02 | 9.48  | 2.82 | 8.99  | 3.82 | 8.91  | 0    | 9.73  | 10.35 |
| 2.56 | 8.21  | 2.56 | 9.12  | 4.3  | 9.8   | 1.98 | 5.59  | 10.27 |
| 5.15 | 5.15  | 8.32 | 7.96  | 7.74 | 6.15  | 6.74 | 6.74  | 9.91  |
| 6.34 | 7.8   | 7.93 | 8.74  | 7.48 | 8.43  | 2.79 | 8.2   | 10.06 |
| 6.2  | 8.04  | 7.35 | 8.48  | 7.57 | 8.95  | 1.28 | 9.41  | 9.03  |
| 1.83 | 0.24  | 9.34 | 0.24  | 9.43 | 9.25  | 1.83 | 7.9   | 10.1  |
| 0.77 | 2.36  | 9.42 | 2.36  | 9.6  | 9.17  | 2.77 | 7.84  | 9.98  |
| 5.95 | 8.98  | 5.97 | 8.15  | 6.27 | 7.95  | 3.14 | 7.81  | 7.58  |
| 6.81 | 9.37  | 6.07 | 8.11  | 6.6  | 7.48  | 1.26 | 8.09  | 7.52  |
| 4.67 | 8.48  | 6.54 | 8.2   | 6.83 | 8.65  | 1.26 | 7.16  | 7.63  |
| 3.18 | 5.03  | 2.1  | 9.51  | 4.85 | 10.73 | 4.45 | 6.21  | 6.6   |
| 3.45 | 5.19  | 4.67 | 9.12  | 6.03 | 9.91  | 3.6  | 5.45  | 6.88  |
| 1.05 | 1.05  | 6.83 | 8.59  | 6.93 | 9.36  | 4.37 | 6.88  | 7.42  |
| 3.64 | 10.23 | 4.64 | 9.93  | 5.64 | 10.18 | 2.22 | 6.34  | 8.85  |
| 3.5  | 11.13 | 4.36 | 10.74 | 5.71 | 11.33 | 2.85 | 8.29  | 8.82  |
| 2.69 | 10.48 | 3.01 | 10.56 | 5.69 | 11.63 | 3.01 | 7.9   | 9.59  |
| 5.06 | 11.13 | 6.85 | 9.26  | 7.02 | 9.65  | 4.53 | 10.13 | 10    |
| 3.44 | 10.62 | 6.09 | 9.59  | 6.92 | 9.46  | 5.65 | 9.03  | 9.89  |
| 2.15 | 9.82  | 6.61 | 9.1   | 7.01 | 9.45  | 5.44 | 7.46  | 9.37  |
| 1.12 | 7.84  | 6.73 | 8.53  | 7.24 | 8.98  | 2.44 | 7.05  | 8.61  |
| 2.52 | 8.53  | 6.18 | 8.87  | 6.97 | 8.54  | 2.52 | 6.75  | 8.18  |
| 1.99 | 8.12  | 7.03 | 8.38  | 7.37 | 8.45  | 2.31 | 7.18  | 8.49  |
| 2.05 | 3.54  | 6.62 | 10    | 7.29 | 10.04 | 2.31 | 7.31  | 7.56  |
| 4.69 | 6.56  | 7.06 | 9.94  | 7.27 | 10.14 | 3.05 | 8.01  | 7.83  |
| 1.92 | 2.73  | 7.43 | 10.32 | 7.49 | 10.82 | 3.09 | 7.33  | 7.91  |
| 2.02 | 6.19  | 6.85 | 8.62  | 7.08 | 9.24  | 2.44 | 7.23  | 9.4   |
| 2.02 | 6.19  | 6.85 | 8.62  | 7.08 | 9.24  | 2.44 | 7.23  | 9.4   |
| 1.73 | 3.47  | 6.28 | 8.19  | 7.07 | 9.53  | 2.15 | 6.61  | 7.55  |
| 2.76 | 3.35  | 7.29 | 8.71  | 7.17 | 10.09 | 2.76 | 7.28  | 7.24  |
| 0.69 | 1.27  | 6.51 | 9.38  | 7.27 | 10.47 | 2.69 | 6.69  | 7.72  |
| 0.56 | 6.41  | 7.31 | 6.62  | 7.14 | 7.47  | 0.56 | 7.75  | 8.58  |
| 5.2  | 8.41  | 6.23 | 8.84  | 6.9  | 9.61  | 1.88 | 9.51  | 7.91  |
| 4.47 | 9.01  | 6.23 | 8.51  | 6.41 | 8.93  | 2.76 | 9.07  | 7.54  |
| 2.2  | 6     | 7.44 | 8.13  | 6.88 | 8.86  | 3.42 | 7.35  | 7.46  |
| 3.43 | 8.17  | 2.9  | 9.29  | 5.19 | 9.82  | 2.31 | 7.76  | 7.9   |
| 5.43 | 7.91  | 2.08 | 8.79  | 5.08 | 8.77  | 2.08 | 9.13  | 6.71  |
| 2.1  | 6.22  | 3.32 | 9.74  | 4.98 | 9.35  | 2.1  | 6.67  | 9.81  |
| 4.06 | 4.15  | 7.21 | 7.07  | 7.3  | 8     | 2.74 | 7.38  | 8.38  |
| 4.1  | 4.1   | 7.04 | 9.48  | 7.72 | 10.63 | 2.02 | 7.4   | 7.35  |
| 3.26 | 2.46  | 6.93 | 8.72  | 6.74 | 9.31  | 3.04 | 7.5   | 7.01  |
| 3.57 | 7.19  | 6.68 | 8.3   | 5.95 | 9.11  | 3.4  | 7.62  | 8.05  |

<https://mc.manuscriptcentral.com/gut>



1  
2  
3  
4  
5  
6  
7  
8  
9  
10  
11  
12  
13  
14  
15  
16  
17  
18  
19  
20  
21  
22  
23  
24  
25  
26  
27  
28  
29  
30  
31  
32  
33  
34  
35  
36  
37  
38  
39  
40  
41  
42  
43  
44  
45  
46  
47  
48  
49  
50  
51  
52  
53  
54  
55  
56  
57  
58  
59  
60

|      |      |      |       |      |       |      |       |       |
|------|------|------|-------|------|-------|------|-------|-------|
| 3.21 | 8.06 | 6.64 | 9.01  | 6.08 | 9.6   | 3.8  | 7.97  | 7.93  |
| 0.78 | 3.48 | 7.36 | 8.5   | 7.75 | 8.77  | 2.78 | 7.47  | 8.3   |
| 1.25 | 6.89 | 6.08 | 7.92  | 6.44 | 7.8   | 1.57 | 4     | 10.54 |
| 7.4  | 8.56 | 4.98 | 9.79  | 5.75 | 11.14 | 3.88 | 12.63 | 9.13  |
| 2.49 | 5.81 | 5.01 | 10.16 | 5.85 | 11.81 | 2.49 | 6.98  | 7.77  |
| 1.99 | 7.25 | 2.41 | 9.27  | 5.41 | 8.71  | 3.21 | 2.99  | 9.55  |
| 6.81 | 9.86 | 4.87 | 10.32 | 3.45 | 9.93  | 2.13 | 11.29 | 8.94  |
| 5.31 | 9.02 | 4.76 | 10.31 | 4.22 | 10.44 | 1.34 | 10.04 | 8.22  |
| 2.49 | 8.38 | 3.49 | 10.28 | 6.08 | 8.35  | 4.08 | 6.08  | 9.87  |
| 0.79 | 6.72 | 1.79 | 8.63  | 4.88 | 6.92  | 3.96 | 1.79  | 10.03 |
| 4.3  | 6.95 | 2.08 | 8.8   | 3.3  | 8.58  | 3.49 | 8.35  | 7.87  |
| 2.48 | 6.8  | 6.9  | 7.92  | 6.43 | 7.96  | 2.21 | 7.54  | 7.76  |
| 3.26 | 5.96 | 2.26 | 9.93  | 6.72 | 8.55  | 4.85 | 6.26  | 10.62 |
| 0.79 | 0.79 | 8.82 | 1.2   | 9.14 | 8.52  | 0    | 8.46  | 9.44  |
| 3.85 | 8.03 | 4.19 | 9.23  | 4.85 | 8.74  | 2.53 | 9.07  | 7.65  |
| 5.92 | 8.05 | 2.42 | 8.9   | 3    | 8.53  | 2.16 | 9.24  | 6.93  |
| 3.1  | 6.96 | 3.61 | 8.82  | 4.81 | 8.73  | 2.1  | 6.01  | 7.17  |
| 2.24 | 9.03 | 1.76 | 9.87  | 3.68 | 10.25 | 2.24 | 4.64  | 8.57  |
| 0    | 7.36 | 6.49 | 9.39  | 6.57 | 10.1  | 1.94 | 5.9   | 8.33  |
| 0.4  | 8.67 | 5.87 | 9.66  | 5.74 | 9.74  | 2.57 | 5.07  | 9.45  |
| 5.16 | 5.16 | 6.16 | 5.16  | 7.49 | 6.75  | 5.16 | 7.16  | 9.92  |
| 5.7  | 8.96 | 3.66 | 8.32  | 4.04 | 8.38  | 3.38 | 10.3  | 7.97  |
| 3.34 | 7.75 | 2.12 | 8.96  | 4.71 | 9.4   | 2.54 | 6.94  | 8.74  |
| 1.18 | 5.88 | 1.18 | 9.4   | 6.22 | 9.05  | 4.64 | 4.77  | 7.16  |
| 2.91 | 4.91 | 2.91 | 9.78  | 7.26 | 9.69  | 3.91 | 4.08  | 7.78  |
| 2.13 | 5.19 | 1.54 | 9.94  | 6.24 | 10.09 | 3.54 | 4.13  | 8.08  |
| 2    | 5.39 | 7.87 | 3.58  | 8.39 | 8.09  | 2.58 | 8.08  | 9.19  |
| 0.86 | 0.86 | 7.93 | 0.86  | 8.69 | 8.22  | 2.86 | 8.17  | 8.15  |
| 1.77 | 4.35 | 8.05 | 1.77  | 8.11 | 7.38  | 3.35 | 8.16  | 7.77  |
| 0.01 | 4.87 | 0.01 | 8.81  | 4.01 | 8.77  | 0.01 | 0.01  | 7.89  |
| 3.4  | 6.61 | 4.18 | 9.67  | 4.8  | 11.54 | 1.18 | 6.64  | 8.16  |
| 2.92 | 6.92 | 1.11 | 8.74  | 4.92 | 10.23 | 0.11 | 7.38  | 6.66  |
| 0.16 | 1.16 | 1.74 | 9.17  | 5.51 | 10.66 | 0.16 | 2.16  | 8.11  |
| 0.45 | 2.04 | 7.07 | 3.04  | 7.74 | 7.3   | 0.45 | 7.39  | 8.32  |
| 0.25 | 2.57 | 7.02 | 3.71  | 6.85 | 7.33  | 0.25 | 7.29  | 7.31  |
| 0    | 2.67 | 6.5  | 4.87  | 7.21 | 7.04  | 0.93 | 6.9   | 7.24  |
| 0    | 0    | 7.83 | 0.91  | 8.09 | 8.11  | 0.32 | 7.15  | 8.46  |
| 2.34 | 1.34 | 7.14 | 1.34  | 7.62 | 7.31  | 1.34 | 7.51  | 7.38  |
| 1.1  | 3.1  | 7.35 | 1.1   | 7.21 | 7.31  | 1.1  | 7.57  | 7.1   |
| 0.31 | 1.31 | 7.24 | 2.63  | 7.06 | 7.32  | 1.31 | 7.52  | 7.29  |
| 2.41 | 3.41 | 9.21 | 2.41  | 7.27 | 7.7   | 2.41 | 4.41  | 9.19  |
| 1.06 | 3.06 | 7.88 | 4.38  | 8.1  | 8.01  | 2.64 | 8.19  | 8.25  |
| 0    | 1.33 | 8.45 | 2.13  | 8.73 | 8.38  | 0.91 | 8.52  | 8.63  |
| 2.45 | 7.8  | 7.17 | 6.95  | 7.69 | 7.55  | 1.87 | 7.38  | 7.61  |
| 0.75 | 4.7  | 7.97 | 3.66  | 8.15 | 8.09  | 1.33 | 7.97  | 8.23  |
| 1.3  | 6.12 | 6.93 | 6.99  | 7.71 | 8.22  | 2.3  | 7.4   | 9.17  |
| 0.3  | 3.46 | 7.98 | 4.75  | 8.24 | 8.1   | 0.3  | 8.28  | 8.23  |
| 0.71 | 0.71 | 8.19 | 3.03  | 8.06 | 8.12  | 2.29 | 8.63  | 7.65  |
| 0    | 3.22 | 8.27 | 3.48  | 8.49 | 8.72  | 0.9  | 8.02  | 8.53  |
| 1.5  | 8.19 | 6.58 | 7.58  | 5.53 | 7.4   | 0    | 7.13  | 7.84  |
| 2.07 | 9.15 | 6.5  | 8.61  | 5.58 | 8.68  | 2.07 | 7.39  | 7.63  |
| 2.36 | 8.74 | 6.34 | 8.67  | 6.27 | 8.93  | 1.04 | 7.37  | 7.91  |

<https://mc.manuscriptcentral.com/gut>

1  
2  
3  
4  
5  
6  
7  
8  
9  
10  
11  
12  
13  
14  
15  
16  
17  
18  
19  
20  
21  
22  
23  
24  
25  
26  
27  
28  
29  
30  
31  
32  
33  
34  
35  
36  
37  
38  
39  
40  
41  
42  
43  
44  
45  
46  
47  
48  
49  
50  
51  
52  
53  
54  
55  
56  
57  
58  
59  
60

|      |      |      |       |      |       |      |       |       |
|------|------|------|-------|------|-------|------|-------|-------|
| 0.27 | 8.6  | 6.55 | 8.1   | 6.63 | 8.39  | 0.27 | 7.05  | 8.07  |
| 1.52 | 3.84 | 5.87 | 8.74  | 7.13 | 9.59  | 3.32 | 5.98  | 8.52  |
| 3.82 | 7.47 | 6.35 | 9.15  | 7.44 | 11    | 2.97 | 8.52  | 8.71  |
| 1.74 | 4.33 | 5.99 | 8.18  | 7.18 | 8.99  | 2.74 | 6.2   | 8.3   |
| 0.54 | 5.22 | 5.99 | 8.28  | 7.2  | 8.97  | 1.27 | 6.61  | 8.17  |
| 2.09 | 7.62 | 7.22 | 8.47  | 7.17 | 8.69  | 2.93 | 6.76  | 9.5   |
| 5.16 | 8.48 | 4.54 | 9.16  | 5.97 | 10.16 | 3.43 | 9.3   | 8.8   |
| 5.07 | 8.67 | 4.98 | 8.86  | 5.07 | 9.77  | 2.56 | 8.93  | 8.26  |
| 2.74 | 4.44 | 4.83 | 8.98  | 5.95 | 10.28 | 4.2  | 4.44  | 9.43  |
| 0.76 | 7.09 | 5.29 | 9.62  | 6.49 | 7.65  | 3.57 | 5.22  | 9.75  |
| 0.17 | 5.07 | 5.84 | 9.99  | 7.02 | 10.04 | 4.63 | 5.49  | 8.19  |
| 2.71 | 9.9  | 6.41 | 10.35 | 7.11 | 10.72 | 4.97 | 10.04 | 8.39  |
| 0.06 | 7.26 | 5.27 | 9.87  | 6.06 | 9.14  | 3.87 | 4.06  | 7.78  |
| 1.06 | 7.98 | 5.9  | 8.37  | 6.19 | 7.4   | 2.06 | 5.84  | 8.46  |
| 2.51 | 9.04 | 0.51 | 9.06  | 3.68 | 9.95  | 1.51 | 6.81  | 8.74  |
| 0.15 | 4.32 | 5.9  | 8.93  | 6.45 | 9.91  | 3.15 | 6.25  | 7.97  |
| 1    | 6.28 | 2.32 | 8.96  | 6.12 | 9.24  | 1.58 | 1     | 10.19 |
| 3.67 | 7.95 | 2.25 | 9.83  | 4.91 | 10.87 | 1.67 | 7.09  | 7.93  |
| 2.84 | 5.27 | 0.52 | 10.23 | 5.22 | 10.48 | 2.84 | 2.52  | 7.45  |
| 0    | 5.68 | 0    | 8.18  | 4.45 | 8.73  | 2.25 | 4.57  | 8.45  |
| 6.31 | 9.17 | 5.81 | 10.13 | 6.45 | 11.48 | 2.87 | 10.88 | 8.83  |
| 4.84 | 8.1  | 3.06 | 8.79  | 6.9  | 9.64  | 2.29 | 8.21  | 8.15  |
| 2.69 | 6.06 | 5.63 | 8.68  | 6.69 | 10.06 | 3.11 | 6.66  | 7.93  |
| 3.25 | 6.91 | 5.97 | 9.37  | 6.32 | 9.89  | 3.51 | 7.1   | 8.14  |
| 4.15 | 3.15 | 5.47 | 9.24  | 7.15 | 8.82  | 6.15 | 5.15  | 8.32  |
| 0.36 | 7.22 | 0.36 | 7.85  | 3.17 | 7.21  | 1.36 | 2.36  | 10.03 |
| 0.79 | 9.47 | 4.7  | 7.93  | 5.6  | 9.8   | 2.38 | 5.84  | 9     |
| 2.57 | 9.68 | 4.46 | 8.56  | 4.72 | 9.09  | 0    | 6.63  | 8.78  |
| 1.9  | 8.88 | 1.9  | 9.06  | 3.48 | 11.2  | 1.9  | 6.42  | 8.92  |
| 1.76 | 1.76 | 7.01 | 1.76  | 7.64 | 7.71  | 1.76 | 7.4   | 6.89  |
| 0.72 | 4.81 | 7.11 | 5.63  | 7.16 | 7.15  | 0.72 | 8.66  | 7.04  |
| 0.88 | 0.88 | 7.13 | 0.88  | 7.68 | 7.13  | 0.88 | 7.39  | 7.07  |
| 0.96 | 1.96 | 7.22 | 2.54  | 7.35 | 7.5   | 1.96 | 7.59  | 7.24  |
| 0    | 5.91 | 5.97 | 6.51  | 6.19 | 5.94  | 0    | 5.75  | 8.35  |
| 0    | 4.79 | 6.05 | 6.39  | 7.07 | 8.06  | 1.25 | 7.1   | 7.08  |
| 0    | 4.47 | 6.05 | 7.05  | 6.89 | 8.58  | 0.77 | 7.08  | 7.35  |
| 0.75 | 3.25 | 5.9  | 7.91  | 6.34 | 9.09  | 1.75 | 6.14  | 7.28  |
| 0.35 | 3.81 | 0.35 | 6.56  | 6.33 | 6.6   | 1.35 | 0.35  | 10.56 |
| 3.46 | 6.78 | 5.46 | 9.04  | 6.16 | 10.04 | 1.46 | 7.67  | 7.82  |
| 4.81 | 9.86 | 2.74 | 8.97  | 3.59 | 8.44  | 2.42 | 8.48  | 9.12  |
| 3.23 | 8.44 | 3.23 | 8.77  | 6.69 | 7.79  | 2.23 | 7.52  | 10.86 |
| 0    | 6.31 | 5.77 | 8.57  | 6.69 | 7.56  | 1.59 | 5.29  | 8.82  |
| 4.51 | 8.6  | 4.51 | 8.21  | 4.51 | 8.68  | 5.51 | 7.32  | 10.68 |
| 2.45 | 7.62 | 1.45 | 9.78  | 4.91 | 11.06 | 1.45 | 6.1   | 7.31  |
| 0    | 2.94 | 2.52 | 10.49 | 5.06 | 11.33 | 2.26 | 2.74  | 5.22  |
| 0.68 | 6.38 | 0.68 | 7.27  | 4.59 | 3.68  | 3.27 | 3.27  | 6.51  |
| 0.98 | 9.61 | 5.96 | 8.37  | 5.92 | 8.63  | 2.79 | 5.98  | 9.35  |
| 1.28 | 8.41 | 3.74 | 8.54  | 4.74 | 9.3   | 1.28 | 4.92  | 8.19  |
| 0.26 | 8.79 | 6.43 | 8.08  | 6.65 | 8.79  | 2.26 | 6.68  | 8.97  |
| 0.57 | 6.05 | 2.38 | 8.24  | 4.38 | 7.04  | 0    | 1.16  | 7.79  |
| 3.7  | 4.23 | 4.7  | 8.01  | 5.85 | 10.07 | 2.11 | 6.64  | 5.92  |
| 3.54 | 4.29 | 5.64 | 7.97  | 6.43 | 9.95  | 0    | 7.05  | 6.37  |

<https://mc.manuscriptcentral.com/gut>

1  
2  
3  
4  
5  
6  
7  
8  
9  
10  
11  
12  
13  
14  
15  
16  
17  
18  
19  
20  
21  
22  
23  
24  
25  
26  
27  
28  
29  
30  
31  
32  
33  
34  
35  
36  
37  
38  
39  
40  
41  
42  
43  
44  
45  
46  
47  
48  
49  
50  
51  
52  
53  
54  
55  
56  
57  
58  
59  
60

|      |       |      |      |      |       |      |       |       |
|------|-------|------|------|------|-------|------|-------|-------|
| 0.79 | 0.79  | 0.79 | 8.12 | 5.65 | 8.82  | 0.79 | 2.37  | 4.79  |
| 2.1  | 5.42  | 5.1  | 8.35 | 6.14 | 8.2   | 1.1  | 3.91  | 7.39  |
| 6.44 | 6.47  | 5.23 | 8.06 | 6.34 | 8.81  | 0.59 | 10.39 | 7.09  |
| 3.49 | 4.49  | 5.24 | 8.24 | 5.95 | 8.31  | 0.49 | 7.23  | 5.49  |
| 1.55 | 3.14  | 7.84 | 5.64 | 8.25 | 7.44  | 1.55 | 7.62  | 7.8   |
| 0    | 10.58 | 2.57 | 8.15 | 3.81 | 8.35  | 1.15 | 4.32  | 9.03  |
| 0.07 | 9.37  | 3.07 | 7.43 | 3.39 | 5.89  | 0    | 2.87  | 7.94  |
| 1.35 | 9.31  | 2.94 | 7.31 | 1.94 | 5.52  | 1.67 | 3.88  | 7.82  |
| 0.27 | 0.27  | 7.56 | 1.27 | 7.97 | 7.29  | 0.27 | 7.6   | 7.9   |
| 2.13 | 4.49  | 6.65 | 7.37 | 7.07 | 9.13  | 0    | 7.43  | 7.93  |
| 1.65 | 4.41  | 3.74 | 8.25 | 5.11 | 7.98  | 0    | 1.65  | 7.79  |
| 2.89 | 4.7   | 5.06 | 8.62 | 6.21 | 9.54  | 2.89 | 7.87  | 7.14  |
| 2.89 | 4.89  | 4    | 8.04 | 5.21 | 9.31  | 1.3  | 5.86  | 7.31  |
| 1.71 | 2.45  | 4.83 | 8.48 | 6.5  | 10.27 | 2.45 | 4.77  | 6.88  |
| 2.54 | 4.54  | 3.54 | 8.5  | 5.54 | 6.35  | 3.54 | 3.54  | 7     |
| 2.61 | 9.95  | 4.89 | 7.99 | 5.53 | 8.57  | 3.39 | 5.95  | 10.04 |
| 3.76 | 8.19  | 5.42 | 7.23 | 6.16 | 8.57  | 3.14 | 7.49  | 8.99  |
| 0.75 | 10    | 4.56 | 8.25 | 5.34 | 8.37  | 3.45 | 5.56  | 10.36 |

1  
2  
3  
4  
5  
6  
7  
8  
9  
10  
11  
12  
13  
14  
15  
16  
17  
18  
19  
20  
21  
22  
23  
24  
25  
26  
27  
28  
29  
30  
31  
32  
33  
34  
35  
36  
37  
38  
39  
40  
41  
42  
43  
44  
45  
46  
47  
48  
49  
50  
51  
52  
53  
54  
55  
56  
57  
58  
59  
60

| MMRN2 | MPDZ | MRC1 | MS4A4A | MS4A6A | MT3  | MTA1  | MTBP | MTDH  |
|-------|------|------|--------|--------|------|-------|------|-------|
| 7.89  | 6.69 | 7.24 | 7.87   | 7.31   | 6.8  | 8.1   | 7    | 8.22  |
| 8.28  | 6.78 | 8.43 | 8.43   | 6.92   | 5.77 | 8.05  | 6.48 | 8.58  |
| 8.04  | 6.46 | 8.53 | 7.84   | 7.06   | 6.44 | 7.99  | 7.06 | 8.23  |
| 9.01  | 7.28 | 8.97 | 8.14   | 5.57   | 4.35 | 9.01  | 5.39 | 8.91  |
| 8.31  | 7.71 | 2.59 | 8.62   | 8.27   | 7.72 | 6.84  | 8.34 | 1.01  |
| 7.52  | 7.42 | 6.69 | 7.95   | 6.49   | 5.76 | 8.42  | 6.47 | 8.17  |
| 7.78  | 7.53 | 7.43 | 8.4    | 6.67   | 5.65 | 8.37  | 6.65 | 8.29  |
| 7.73  | 7.41 | 8.12 | 8.1    | 5.56   | 2.72 | 9.61  | 5.85 | 9.15  |
| 7.11  | 6.76 | 7.89 | 9.02   | 6.63   | 3.37 | 9.14  | 5.32 | 8.72  |
| 6.98  | 6.42 | 5.37 | 7.35   | 5.91   | 6.06 | 8.59  | 7.04 | 8.2   |
| 6.75  | 6.38 | 6.84 | 7.46   | 5.13   | 2.96 | 9.08  | 5.77 | 8.86  |
| 7.65  | 6.81 | 7.52 | 7.8    | 4.85   | 3    | 9.15  | 6.07 | 8.81  |
| 7.16  | 6.44 | 6.44 | 7.38   | 6.53   | 6.64 | 9.13  | 7.74 | 8.51  |
| 7.81  | 7.24 | 7.13 | 7.75   | 6.76   | 6.6  | 9.06  | 7.77 | 9.12  |
| 8.29  | 6.58 | 8.67 | 7.44   | 6.81   | 5.09 | 10.25 | 7.35 | 10.46 |
| 7.6   | 7.09 | 8.18 | 8.29   | 7.05   | 6.53 | 8.9   | 7.43 | 8.23  |
| 7.56  | 6.81 | 7.33 | 8.03   | 7.04   | 6.29 | 9.23  | 7.24 | 8.4   |
| 7.53  | 7.3  | 7.05 | 7.96   | 7.01   | 6.76 | 9.6   | 7.39 | 8.46  |
| 8.01  | 6.09 | 8.8  | 6.89   | 5.36   | 3.8  | 10.29 | 6.42 | 9.21  |
| 7.75  | 6.17 | 8.42 | 8.03   | 6.56   | 1.31 | 9.55  | 5.99 | 9.12  |
| 8.24  | 6.98 | 9.17 | 7.58   | 6.42   | 4.25 | 9.78  | 6.05 | 9.12  |
| 7.41  | 8.04 | 8.62 | 8.47   | 6.47   | 4.06 | 9.2   | 6.3  | 9.46  |
| 7.43  | 7.92 | 8.77 | 8.45   | 6.43   | 4.11 | 9.26  | 6.33 | 9.44  |
| 7.23  | 8.25 | 8.77 | 8.95   | 6.43   | 3.8  | 9.17  | 5.54 | 9.23  |
| 6.1   | 5.43 | 7.76 | 7.04   | 5.07   | 2.43 | 9.18  | 5.67 | 8.67  |
| 7     | 4.88 | 6.98 | 6.88   | 5.22   | 3.59 | 9.02  | 6.06 | 9.26  |
| 6.69  | 5.43 | 6.88 | 7.01   | 5.22   | 3.52 | 8.9   | 6.5  | 8.99  |
| 7.54  | 6.22 | 6.56 | 7.79   | 6.95   | 5.98 | 8.57  | 6.68 | 8.73  |
| 7.48  | 6.19 | 6.22 | 7.27   | 6.75   | 6.82 | 8.75  | 7.07 | 7.98  |
| 8.09  | 6.75 | 7.67 | 7.78   | 7.02   | 6.53 | 8.51  | 7.08 | 8.56  |
| 7.9   | 6.28 | 6.33 | 6.84   | 6.67   | 6.95 | 8.77  | 6.7  | 8.27  |
| 8.32  | 6.92 | 7.87 | 8      | 7.71   | 7.48 | 8.63  | 7.31 | 7.95  |
| 7.82  | 6.5  | 8.27 | 8.57   | 7.23   | 6.53 | 8.62  | 7.14 | 7.86  |
| 7.85  | 7.53 | 8.02 | 8.48   | 5.87   | 3.87 | 9.63  | 6.53 | 8.53  |
| 7.55  | 6.18 | 7.61 | 7.71   | 5.34   | 4.31 | 9.77  | 6.46 | 8.61  |
| 7.85  | 6.68 | 8.28 | 8.2    | 5.06   | 1.47 | 9.82  | 6.54 | 8.58  |
| 6.85  | 5.45 | 7.6  | 7.3    | 5.8    | 2.45 | 9.13  | 5.62 | 9.35  |
| 6.21  | 5.53 | 7.84 | 7.4    | 4.61   | 3.8  | 9.01  | 5.05 | 9.38  |
| 6.91  | 6.01 | 8.57 | 7.99   | 5.86   | 4.17 | 8.74  | 5.01 | 8.98  |
| 6.7   | 6.19 | 8.74 | 7.82   | 6.3    | 3.91 | 8.83  | 5.72 | 9.01  |
| 7.52  | 6.68 | 6.05 | 7.71   | 6.59   | 6.14 | 9.64  | 6.88 | 7.56  |
| 7.24  | 6.32 | 5.25 | 7.07   | 6.51   | 5.94 | 9.95  | 7.03 | 7.76  |
| 7.11  | 6.59 | 6.03 | 7.32   | 6.68   | 5.61 | 10.34 | 6.96 | 7.62  |
| 6.38  | 6.15 | 5.31 | 6.9    | 5.34   | 5.14 | 10.61 | 6.58 | 8.13  |
| 7.18  | 5.18 | 7.18 | 6.03   | 2.86   | 6.45 | 10.53 | 4.86 | 8.56  |
| 7.18  | 6.07 | 7.49 | 7.58   | 5.77   | 3.77 | 8.68  | 4.56 | 8.39  |
| 7.66  | 6.28 | 7.79 | 7.61   | 5.17   | 3.17 | 8.94  | 5.49 | 8.34  |
| 7.36  | 7.02 | 7.63 | 7.71   | 4.9    | 3.39 | 8.8   | 5.33 | 8.26  |
| 7.33  | 6.57 | 8.18 | 9.04   | 6.8    | 3.8  | 9.72  | 7.01 | 9.49  |
| 7.19  | 6.78 | 7.54 | 8.78   | 5.74   | 2.82 | 9.14  | 7.2  | 9.78  |
| 7.28  | 6.56 | 7.84 | 8.72   | 6.2    | 2.5  | 9.15  | 7.78 | 9.87  |

<https://mc.manuscriptcentral.com/gut>

|    |      |      |      |      |      |       |       |      |       |
|----|------|------|------|------|------|-------|-------|------|-------|
| 1  |      |      |      |      |      |       |       |      |       |
| 2  | 7.76 | 7.25 | 8.43 | 9.42 | 6.03 | 3.08  | 9.33  | 7.46 | 9.63  |
| 3  | 7.48 | 6.22 | 5.76 | 7.01 | 6.37 | 7.33  | 9.63  | 8.73 | 9.54  |
| 4  | 7.81 | 6.58 | 5.92 | 7.29 | 6.58 | 7.44  | 9.42  | 8.82 | 9.44  |
| 5  | 7.75 | 5.98 | 5.71 | 7.3  | 6.48 | 7.19  | 9.35  | 8.54 | 9.69  |
| 6  | 7.52 | 6.93 | 7.13 | 7.74 | 6.97 | 7.62  | 9.45  | 8.69 | 9.49  |
| 7  | 7.49 | 6.93 | 8.03 | 8.19 | 6.74 | 5.32  | 9.53  | 6.06 | 9.47  |
| 8  | 7.7  | 6.46 | 9.08 | 8.75 | 5.95 | 4.33  | 9.87  | 6.57 | 9.85  |
| 9  | 6.99 | 4.96 | 6.04 | 7.01 | 4.78 | 4.29  | 9.95  | 6.65 | 10.24 |
| 10 | 6.96 | 6.78 | 7.47 | 7.93 | 6.08 | 4.25  | 10.59 | 6.74 | 10.1  |
| 11 | 6.49 | 4.83 | 7.52 | 7.9  | 5.79 | 3.75  | 9.56  | 5.79 | 9.25  |
| 12 | 7.16 | 5.79 | 7.47 | 7.64 | 6.07 | 3.54  | 9.47  | 6.24 | 9.28  |
| 13 | 6.58 | 5.37 | 7.16 | 7.53 | 4.77 | 3.82  | 9.64  | 6.19 | 9.55  |
| 14 | 6.61 | 6.21 | 7.79 | 7.88 | 5.88 | 2.98  | 9.54  | 6.07 | 9.32  |
| 15 | 7.74 | 5.15 | 6.15 | 6.15 | 7.47 | 12.15 | 8.15  | 6.74 | 8.47  |
| 16 | 8.16 | 6.04 | 7.97 | 8.16 | 6.34 | 8.06  | 9.01  | 8.14 | 8.99  |
| 17 | 7.97 | 6.96 | 8.08 | 8.35 | 7.14 | 6.85  | 8.42  | 7.74 | 8.69  |
| 18 | 9.7  | 8.08 | 2.83 | 9.28 | 8.45 | 9.53  | 7.73  | 9.51 | 1.24  |
| 19 | 9.54 | 7.95 | 4.23 | 9.08 | 8.02 | 9.59  | 7.74  | 9.18 | 2.77  |
| 20 | 7.24 | 5.72 | 4.53 | 6.58 | 6.51 | 6.23  | 9.18  | 7.24 | 9.06  |
| 21 | 7.07 | 5.96 | 4.75 | 6.56 | 6.03 | 6.74  | 9.03  | 7.32 | 9.05  |
| 22 | 7.41 | 6.24 | 5.67 | 6.99 | 6.9  | 6.83  | 9.09  | 7.23 | 8.79  |
| 23 | 8.09 | 7.2  | 7.83 | 8.86 | 5.29 | 2.68  | 9.4   | 7.02 | 9.19  |
| 24 | 7.81 | 7.29 | 7.83 | 8.55 | 6.01 | 5.41  | 9.36  | 7.33 | 9.11  |
| 25 | 8.34 | 7.57 | 8.21 | 9.31 | 7.37 | 5.86  | 8.74  | 7.53 | 8.65  |
| 26 | 7.38 | 6.77 | 8.75 | 8.36 | 6.39 | 5.03  | 9.77  | 6.77 | 9.46  |
| 27 | 7.53 | 7.47 | 8.72 | 8.54 | 6.38 | 4.85  | 9.9   | 6.27 | 9.45  |
| 28 | 7.39 | 7.62 | 8.39 | 8.54 | 5.55 | 5.82  | 9.88  | 6.08 | 9.38  |
| 29 | 7.58 | 7.25 | 8.6  | 8.15 | 6.53 | 5.91  | 9.54  | 7.45 | 9.45  |
| 30 | 7.54 | 7.86 | 8.33 | 7.98 | 6.28 | 5.34  | 9.62  | 7.62 | 9.55  |
| 31 | 7.47 | 7.54 | 8.37 | 8.25 | 6.78 | 5.71  | 9.62  | 7.64 | 9.23  |
| 32 | 7.95 | 7.42 | 7.89 | 8.92 | 7.3  | 6.51  | 8.91  | 7.25 | 8.8   |
| 33 | 7.82 | 7.03 | 7.02 | 8.31 | 7.3  | 6.48  | 9.22  | 7.22 | 8.55  |
| 34 | 8.01 | 7.06 | 6.73 | 8.13 | 7.4  | 6.63  | 8.88  | 7.6  | 8.38  |
| 35 | 7.95 | 7.14 | 7.34 | 8.29 | 6.88 | 5.77  | 8.69  | 7.04 | 8.4   |
| 36 | 7.7  | 6.83 | 7.12 | 7.77 | 6.83 | 6.3   | 8.62  | 7.31 | 8.69  |
| 37 | 8.06 | 7.12 | 8.18 | 8.41 | 6.88 | 6.31  | 8.68  | 7.16 | 8.39  |
| 38 | 7.92 | 7.55 | 7.84 | 8.14 | 7.26 | 6.78  | 8.56  | 7.41 | 8.09  |
| 39 | 7.92 | 7.55 | 7.84 | 8.14 | 7.26 | 6.78  | 8.56  | 7.41 | 8.09  |
| 40 | 7.52 | 7.23 | 6.61 | 8.07 | 6.9  | 6.4   | 8.87  | 7.45 | 8.39  |
| 41 | 7.86 | 7.65 | 7.57 | 8.18 | 7.69 | 6.37  | 8.59  | 7.33 | 8.32  |
| 42 | 7.55 | 7.79 | 7.47 | 8.37 | 7.12 | 6.18  | 8.69  | 7.23 | 8.41  |
| 43 | 8.14 | 7.46 | 7.01 | 8.19 | 7.8  | 5.95  | 8.43  | 7.38 | 7.11  |
| 44 | 7.93 | 7.45 | 7.47 | 8.14 | 7.26 | 6.3   | 8.59  | 7.28 | 8.09  |
| 45 | 7.77 | 7.15 | 7.81 | 7.79 | 7.21 | 5.65  | 9.1   | 6.69 | 8.47  |
| 46 | 8.17 | 7.68 | 7.81 | 8.35 | 8.02 | 5.9   | 8.64  | 7.54 | 7.7   |
| 47 | 7.04 | 6.46 | 6.97 | 7.28 | 5.51 | 3.98  | 9.36  | 6.31 | 9.18  |
| 48 | 6.73 | 5.6  | 6.31 | 6.14 | 4.78 | 3.66  | 9.48  | 6.25 | 9.12  |
| 49 | 7.66 | 6.25 | 7.38 | 7.7  | 5.22 | 4.77  | 9.56  | 6.45 | 9.15  |
| 50 | 8.07 | 7.28 | 7.04 | 8.1  | 7.69 | 6.04  | 7.88  | 7.22 | 7.38  |
| 51 | 8.27 | 7.79 | 8.19 | 8.3  | 7.59 | 6.86  | 8.17  | 7.19 | 7.58  |
| 52 | 8.05 | 7.75 | 7.69 | 8.09 | 7.52 | 6.01  | 8.11  | 7.34 | 7.71  |
| 53 | 7    | 6.51 | 5.92 | 7.86 | 7.08 | 5.4   | 8.27  | 7.22 | 7.75  |

1  
2  
3  
4  
5  
6  
7  
8  
9  
10  
11  
12  
13  
14  
15  
16  
17  
18  
19  
20  
21  
22  
23  
24  
25  
26  
27  
28  
29  
30  
31  
32  
33  
34  
35  
36  
37  
38  
39  
40  
41  
42  
43  
44  
45  
46  
47  
48  
49  
50  
51  
52  
53  
54  
55  
56  
57  
58  
59  
60

|      |      |      |      |      |      |       |      |      |
|------|------|------|------|------|------|-------|------|------|
| 7.04 | 6.93 | 6.47 | 7.6  | 7.18 | 5.41 | 8.23  | 7.07 | 8.17 |
| 7.41 | 7.41 | 4.82 | 8.52 | 7.88 | 6.89 | 8.1   | 8.07 | 7.18 |
| 7.46 | 6.78 | 8.14 | 8.15 | 6.98 | 6.04 | 9.26  | 6.65 | 8.49 |
| 8.29 | 6.95 | 9.12 | 8.92 | 7    | 5.25 | 9.22  | 6.38 | 8.73 |
| 8.32 | 8.18 | 9.27 | 9.45 | 7.23 | 5.19 | 9.23  | 6.25 | 8.68 |
| 7.45 | 6.83 | 8.22 | 7.85 | 6.16 | 4.93 | 9.41  | 6.31 | 9.29 |
| 6.9  | 5.59 | 6.91 | 7.1  | 4.72 | 3.13 | 9.53  | 5.72 | 9.08 |
| 7.32 | 6.13 | 6.77 | 7.93 | 5.46 | 3.46 | 9.53  | 5.97 | 9.25 |
| 8.66 | 6.74 | 8.49 | 7.25 | 6.08 | 5.49 | 10.84 | 6.95 | 9.48 |
| 7.48 | 5.96 | 7.44 | 6.6  | 4.88 | 4.96 | 9.65  | 5.38 | 8.79 |
| 6.49 | 5.58 | 6.47 | 6.22 | 4.81 | 3.49 | 9.77  | 5.35 | 9.02 |
| 7.03 | 6    | 5.38 | 7.08 | 6.75 | 5.45 | 9.34  | 6.59 | 8.07 |
| 8.3  | 5.96 | 7.12 | 6.65 | 4.26 | 6.43 | 10.71 | 5.85 | 9.13 |
| 9.22 | 7.45 | 3.52 | 8.55 | 8.4  | 8.49 | 7.68  | 9.58 | 0.2  |
| 7.03 | 5.83 | 5.23 | 7.3  | 4.41 | 4.9  | 8.63  | 7.34 | 9.19 |
| 7    | 5.36 | 5.59 | 6.9  | 4.08 | 2.16 | 8.66  | 7.36 | 9.41 |
| 6.96 | 6.06 | 5.98 | 7.25 | 4.73 | 4.73 | 8.59  | 7.14 | 9.17 |
| 6    | 6.24 | 8.32 | 7.83 | 6.22 | 2.89 | 9.13  | 5.5  | 8.5  |
| 6.83 | 6.58 | 7.71 | 7.38 | 6.14 | 5.79 | 8.29  | 6.85 | 7.47 |
| 6.41 | 6.62 | 9.06 | 8.22 | 6.29 | 5.62 | 8.64  | 6.36 | 7.87 |
| 6.16 | 6.75 | 7.16 | 5.16 | 7.16 | 9.81 | 9.33  | 6.75 | 6.75 |
| 5.99 | 6.16 | 6.39 | 6.76 | 4.18 | 3.99 | 7.9   | 5.36 | 8.58 |
| 6.71 | 6.18 | 7.65 | 7.49 | 5.49 | 3.99 | 8.26  | 5.62 | 8.59 |
| 7.31 | 6.77 | 7.67 | 6.85 | 4.5  | 2.77 | 9.55  | 5.5  | 8.16 |
| 8.08 | 6.69 | 8.38 | 7.43 | 5.71 | 1.91 | 9.67  | 5.3  | 8.38 |
| 7.7  | 7.48 | 8.33 | 7.9  | 5.35 | 3.35 | 9.44  | 5.19 | 8.64 |
| 8.24 | 7.24 | 6.35 | 8.23 | 8.2  | 8.03 | 7.15  | 7.94 | 4.9  |
| 8.69 | 7.46 | 2.86 | 8.5  | 8.2  | 8.15 | 6.74  | 8.03 | 1.86 |
| 8.51 | 7.52 | 3.35 | 8.31 | 8.12 | 7.29 | 7.05  | 8.11 | 1.77 |
| 6.82 | 6.33 | 6.96 | 7.89 | 5.74 | 1.59 | 8.29  | 4.01 | 7.56 |
| 7.46 | 6.95 | 7.37 | 7.4  | 3.29 | 0    | 8.44  | 4.55 | 7.66 |
| 7.24 | 6.09 | 6.81 | 7.2  | 4.75 | 2.11 | 8.6   | 4.75 | 7.63 |
| 7.63 | 7.05 | 7.52 | 7.97 | 4.55 | 1.74 | 8.33  | 3.96 | 7.23 |
| 7.84 | 6.93 | 4.97 | 7.88 | 7.31 | 6.93 | 6.94  | 6.96 | 3.62 |
| 7.6  | 6.94 | 1.84 | 7.58 | 7.26 | 6.11 | 6.46  | 7.01 | 4.64 |
| 7.41 | 6.45 | 3.43 | 7.12 | 6.65 | 6.82 | 6.51  | 6.89 | 5.04 |
| 8.43 | 7.22 | 1.64 | 8.2  | 7.24 | 7.74 | 6.43  | 7.91 | 0    |
| 7.4  | 6.89 | 2.34 | 7.27 | 7.31 | 6.89 | 6.46  | 6.51 | 4.14 |
| 7.76 | 6.85 | 2.1  | 7.84 | 7.29 | 6.8  | 6.1   | 7.12 | 1.1  |
| 7.57 | 6.67 | 1.89 | 7.64 | 7.25 | 6.35 | 6.12  | 7.02 | 2.63 |
| 7.62 | 5.58 | 2.41 | 8.11 | 5.22 | 8.8  | 5.41  | 8.79 | 2.41 |
| 8.57 | 7.86 | 3.06 | 8.23 | 8.32 | 7.88 | 7.74  | 7.99 | 4.38 |
| 8.84 | 7.94 | 2.5  | 8.69 | 8.53 | 8.03 | 7.45  | 8.34 | 0    |
| 8.06 | 6.84 | 5.45 | 8.17 | 7.29 | 7.6  | 8.29  | 7.24 | 6.08 |
| 8.55 | 7.58 | 4.39 | 8.41 | 8.16 | 7.61 | 7.49  | 7.82 | 4    |
| 8.07 | 6.85 | 6.32 | 7.87 | 7.32 | 7.56 | 7.51  | 7.24 | 6.35 |
| 8.61 | 7.24 | 4.46 | 8.24 | 8.21 | 7.76 | 6.82  | 8    | 4.1  |
| 8.63 | 7.5  | 2.71 | 8.42 | 8.44 | 7.43 | 6.51  | 8.17 | 0.71 |
| 8.82 | 7.66 | 4.22 | 9.02 | 8.03 | 8.09 | 6.97  | 8.16 | 3.9  |
| 6.82 | 6.89 | 5.82 | 7.7  | 6.92 | 4.5  | 8.32  | 7.66 | 9.26 |
| 6.51 | 6.98 | 5.85 | 8.32 | 7.21 | 4.65 | 8.65  | 7.74 | 9.42 |
| 7    | 6.83 | 6.12 | 8.5  | 7.27 | 5.84 | 8.45  | 7.82 | 9.29 |

<https://mc.manuscriptcentral.com/gut>

|    |      |      |      |      |      |      |       |      |      |
|----|------|------|------|------|------|------|-------|------|------|
| 1  |      |      |      |      |      |      |       |      |      |
| 2  | 6.78 | 7.01 | 6.36 | 8.68 | 7.39 | 5.88 | 8.16  | 7.59 | 9.23 |
| 3  | 8.27 | 7.1  | 6.91 | 8.39 | 6.56 | 6.07 | 8.78  | 7.17 | 9.03 |
| 4  | 8.55 | 6.99 | 6.99 | 8.37 | 6.62 | 6.39 | 8.54  | 7.23 | 9.14 |
| 5  | 8.19 | 6.91 | 4.55 | 7.79 | 6.74 | 6.26 | 8.88  | 7.51 | 8.81 |
| 6  | 7.91 | 6.71 | 5.78 | 7.97 | 6.6  | 6.05 | 8.87  | 7.31 | 8.9  |
| 7  |      |      |      |      |      |      |       |      |      |
| 8  | 7.9  | 7.29 | 7.32 | 8.39 | 6.97 | 6.07 | 8.99  | 7.8  | 8.68 |
| 9  | 8.4  | 6.89 | 8.63 | 8.67 | 6.16 | 4.93 | 10.05 | 7.37 | 9.93 |
| 10 | 7.59 | 6.58 | 7.87 | 8.54 | 6.41 | 4.56 | 9.96  | 6.72 | 9.66 |
| 11 | 8.94 | 8.11 | 9.65 | 9.14 | 6.2  | 5.13 | 10.38 | 6.33 | 9.49 |
| 12 | 8.09 | 7.26 | 7.74 | 8.39 | 6.32 | 6.16 | 9.7   | 6.49 | 8.94 |
| 13 | 8.36 | 7.35 | 7.95 | 9.4  | 6.69 | 6.38 | 9.86  | 6.45 | 8.56 |
| 14 | 8.03 | 7.26 | 7.92 | 9.29 | 6.53 | 6    | 9.96  | 6.51 | 8.43 |
| 15 | 8.17 | 7.34 | 7.4  | 8.73 | 6.17 | 6.04 | 10.14 | 6.52 | 8.61 |
| 16 | 7.4  | 6.73 | 8.35 | 9.22 | 7.69 | 5.85 | 8.17  | 6.58 | 8.35 |
| 17 | 7.34 | 6.25 | 8.86 | 8.99 | 6.39 | 3.09 | 8.61  | 5.87 | 8.82 |
| 18 | 8.35 | 7.65 | 9.05 | 8.87 | 7.24 | 5.23 | 8.88  | 6.57 | 8.06 |
| 19 | 7.68 | 7.54 | 8.9  | 8.73 | 6.55 | 3    | 9.01  | 5.75 | 8.48 |
| 20 | 7.08 | 6.97 | 7.17 | 8.02 | 5.67 | 3.47 | 9.3   | 5.67 | 8.9  |
| 21 |      |      |      |      |      |      |       |      |      |
| 22 | 7.76 | 7.95 | 7.65 | 8.16 | 5.91 | 2.52 | 9.18  | 5.43 | 8.72 |
| 23 | 6.79 | 6.57 | 7.35 | 7.72 | 5.86 | 3.51 | 9.26  | 6.12 | 9.68 |
| 24 | 6.74 | 6.38 | 6.97 | 6.75 | 3.63 | 3.71 | 8.79  | 6.98 | 9.01 |
| 25 | 6.23 | 5.43 | 5.57 | 5.59 | 4.18 | 2.94 | 8.9   | 6.58 | 8.81 |
| 26 | 7.61 | 7.32 | 7.89 | 7.95 | 6.66 | 5.96 | 8.23  | 6.28 | 8.43 |
| 27 | 7.16 | 7.29 | 7.77 | 8.04 | 6.63 | 6.02 | 8.39  | 6.1  | 8.5  |
| 28 | 8.44 | 7.67 | 9.19 | 7.4  | 4.15 | 7.24 | 10.29 | 6.96 | 9.1  |
| 29 | 6.03 | 5.53 | 8.33 | 7.61 | 5.61 | 1.95 | 8.69  | 6.19 | 7.86 |
| 30 | 7.09 | 5.55 | 8.05 | 8.29 | 6.04 | 4.7  | 8.39  | 6.15 | 7.62 |
| 31 | 6.03 | 5.16 | 7.85 | 8.08 | 5.26 | 3.46 | 8.27  | 6.41 | 7.84 |
| 32 | 6.42 | 6.29 | 8.34 | 8.69 | 5.6  | 2.9  | 8.2   | 6.22 | 7.54 |
| 33 | 7.73 | 6.62 | 1.76 | 7.95 | 7.04 | 7.25 | 6.28  | 7.04 | 1.76 |
| 34 | 7.6  | 6.08 | 3.04 | 7.42 | 7.38 | 6.47 | 7.02  | 7.11 | 4.89 |
| 35 | 7.94 | 6.13 | 1.88 | 7.45 | 7.54 | 6.56 | 6.05  | 7.15 | 0.88 |
| 36 | 7.56 | 6.63 | 0.96 | 7.17 | 7.38 | 6.71 | 6.31  | 6.96 | 0.96 |
| 37 | 6.72 | 5.75 | 5.17 | 6.88 | 6.19 | 5.4  | 7.5   | 5.61 | 6.71 |
| 38 | 7.1  | 6.1  | 5.68 | 6.67 | 6.46 | 6.28 | 7.18  | 6.18 | 6.04 |
| 39 | 7.17 | 6.45 | 6.01 | 7.02 | 6.44 | 5.92 | 7.08  | 5.67 | 6    |
| 40 | 7.05 | 6.71 | 7.07 | 7.45 | 6.54 | 5.74 | 7.22  | 5.91 | 6.56 |
| 41 | 6.94 | 6.48 | 6.58 | 6.91 | 5.35 | 3.68 | 9.22  | 6.03 | 8.68 |
| 42 | 7.29 | 7.24 | 7.59 | 7.53 | 5.92 | 5.71 | 9.17  | 6.05 | 8.99 |
| 43 | 7.38 | 5.81 | 8.11 | 7.5  | 6.3  | 3    | 9.36  | 6.09 | 9.03 |
| 44 | 8.16 | 5.82 | 8.69 | 6.88 | 5.55 | 4.23 | 10.37 | 6.48 | 9.68 |
| 45 | 7.43 | 6.3  | 6.61 | 7.47 | 6.25 | 6.02 | 9.19  | 7.77 | 8.91 |
| 46 | 8.51 | 5.51 | 9.37 | 7.1  | 6.51 | 5.51 | 9.64  | 6.51 | 9.21 |
| 47 | 7.5  | 6.81 | 7.41 | 7.56 | 5.26 | 3.19 | 9.5   | 6.61 | 9.12 |
| 48 | 6.92 | 7.26 | 6.94 | 7.77 | 5.55 | 3.64 | 9.67  | 6.44 | 8.88 |
| 49 | 5.07 | 4    | 4    | 5.68 | 3.49 | 3.27 | 9.14  | 7.65 | 8.51 |
| 50 | 6.93 | 6.34 | 7.9  | 7.9  | 5.92 | 5.98 | 9.12  | 7.22 | 8.5  |
| 51 | 6.28 | 6.03 | 7.53 | 7.28 | 5.13 | 4.18 | 9.36  | 7.39 | 8.62 |
| 52 | 7.22 | 6.48 | 7.99 | 8.19 | 6.72 | 5.98 | 8.66  | 7.47 | 8.01 |
| 53 | 6.14 | 6.66 | 7.02 | 8.16 | 6.31 | 2.57 | 8.32  | 5.68 | 8.12 |
| 54 | 7.17 | 6.76 | 6.26 | 7.46 | 6.26 | 4.78 | 7.53  | 6.39 | 7.42 |
| 55 | 7.33 | 6.28 | 5.92 | 7.34 | 5.98 | 5.42 | 7.57  | 6.24 | 7.09 |

<https://mc.manuscriptcentral.com/gut>

|      |      |      |      |      |      |       |      |      |
|------|------|------|------|------|------|-------|------|------|
| 7.46 | 7.2  | 7.15 | 7.37 | 5.54 | 1.79 | 8.83  | 6.04 | 8    |
| 6.74 | 6.74 | 5.1  | 6.42 | 5.01 | 6.01 | 9.05  | 6.68 | 7.39 |
| 6.34 | 5.11 | 4.05 | 5.54 | 5.23 | 5.63 | 8.76  | 5.72 | 7.5  |
| 6.22 | 4.39 | 4.29 | 5.19 | 4.19 | 5.13 | 8.87  | 5.85 | 7.54 |
| 7.84 | 6.2  | 4.36 | 6.88 | 7.05 | 7.64 | 8.09  | 7.08 | 4.55 |
| 6.33 | 5.85 | 7.9  | 8.13 | 5.29 | 3.47 | 8.85  | 5.42 | 8.9  |
| 5.2  | 4.24 | 6.46 | 6.5  | 4.42 | 3.24 | 8.97  | 5.28 | 8.52 |
| 5.44 | 4.11 | 6.34 | 6.43 | 4.56 | 3.35 | 9.09  | 5.24 | 8.43 |
| 8.29 | 7.41 | 2.27 | 7.8  | 7.66 | 7.34 | 6.75  | 7.66 | 1.27 |
| 7.39 | 6.89 | 6.16 | 7.55 | 7.01 | 6.07 | 7.51  | 7.02 | 6.93 |
| 7.21 | 6.52 | 6.84 | 8.05 | 6.41 | 4.11 | 8.81  | 5.18 | 8.41 |
| 7.6  | 7.23 | 7.06 | 8.15 | 6.98 | 6.02 | 8.1   | 6.02 | 7.83 |
| 7.51 | 7.15 | 7.87 | 7.92 | 6.45 | 4.76 | 8.88  | 5.39 | 8.11 |
| 7.67 | 7.7  | 7.98 | 8.78 | 7.04 | 5.68 | 8.23  | 5.98 | 7.76 |
| 7.4  | 5.13 | 7.83 | 6.24 | 5.35 | 6.94 | 10.75 | 4.87 | 8.94 |
| 6.53 | 5.99 | 8.83 | 7.84 | 5.66 | 5.32 | 9.5   | 7.18 | 8.3  |
| 7.15 | 6.16 | 8.3  | 8.22 | 6.57 | 5.23 | 8.36  | 6.57 | 7.65 |
| 6.62 | 5.64 | 8.93 | 7.53 | 5.4  | 5.45 | 9.83  | 7.07 | 8.26 |



1  
2  
3  
4  
5  
6  
7  
8  
9  
10  
11  
12  
13  
14  
15  
16  
17  
18  
19  
20  
21  
22  
23  
24  
25  
26  
27  
28  
29  
30  
31  
32  
33  
34  
35  
36  
37  
38  
39  
40  
41  
42  
43  
44  
45  
46  
47  
48  
49  
50  
51  
52  
53  
54  
55  
56  
57  
58  
59  
60

| MTOR | MUC1  | MYC   | MYCL | MYH11 | MYLK  | MYO1D | MYO5C | NAA15 |
|------|-------|-------|------|-------|-------|-------|-------|-------|
| 7.98 | 11.9  | 8.39  | 6.94 | 6.25  | 8.24  | 7.57  | 6.95  | 7.14  |
| 8.13 | 11.79 | 8.27  | 6.44 | 8.24  | 9.28  | 8.25  | 8.06  | 6.88  |
| 8.05 | 11.75 | 8.59  | 6.81 | 8.26  | 8.99  | 7.86  | 7.53  | 6.74  |
| 8.18 | 11.79 | 9.2   | 5.35 | 10.35 | 11.05 | 8.05  | 8.5   | 7.11  |
| 8.12 | 3.33  | 8.25  | 7.89 | 6.84  | 8.71  | 8.37  | 7.47  | 6.76  |
| 7.74 | 11.04 | 7.63  | 6.25 | 8.62  | 9.71  | 8.11  | 7.39  | 6.68  |
| 7.78 | 11.36 | 7.92  | 6.09 | 7.55  | 9.06  | 8.31  | 7.71  | 6.83  |
| 8.47 | 12.25 | 9.01  | 3.56 | 9.29  | 10.59 | 7.73  | 8.42  | 7.16  |
| 8.23 | 12.51 | 9.54  | 4.61 | 7.38  | 10.01 | 7.29  | 8.19  | 6.98  |
| 8.08 | 13.15 | 9.07  | 6.51 | 6.08  | 8.98  | 7.45  | 7.77  | 7.74  |
| 7.98 | 13.21 | 9.78  | 4.7  | 8.74  | 9.49  | 7.79  | 8.1   | 7.8   |
| 8.25 | 13.58 | 9.67  | 3.49 | 10.94 | 10.67 | 7.87  | 7.94  | 8.23  |
| 7.88 | 9.25  | 10.62 | 6.99 | 7.15  | 8.59  | 8.81  | 8.11  | 7.34  |
| 8.2  | 8.26  | 10.35 | 6.63 | 6.15  | 9.65  | 8.51  | 7.76  | 7.59  |
| 8.73 | 10.8  | 11.17 | 6.23 | 9.73  | 11.39 | 6.63  | 9.03  | 7.72  |
| 8.46 | 11.18 | 9.39  | 6.53 | 7.66  | 9.3   | 8.17  | 8.07  | 7.74  |
| 8.53 | 11.94 | 8.57  | 7.27 | 10.18 | 10.26 | 8.76  | 8.39  | 7.68  |
| 8.46 | 12.15 | 8.96  | 7.36 | 10.73 | 11.18 | 7.98  | 8.52  | 7.41  |
| 8.64 | 11.73 | 9.91  | 4.36 | 6.18  | 9.37  | 7.83  | 9.53  | 7.99  |
| 8.6  | 12.42 | 9.17  | 4.31 | 9.66  | 10.09 | 8.65  | 9.15  | 8.12  |
| 8.57 | 11.44 | 9.36  | 4.96 | 11.56 | 11.43 | 8.23  | 8.75  | 7.88  |
| 8.7  | 10.78 | 10.01 | 6.19 | 11.36 | 11.94 | 9.06  | 8.33  | 7.69  |
| 8.71 | 10.95 | 10.03 | 6.24 | 10.76 | 11.36 | 9.01  | 8.25  | 7.99  |
| 8.5  | 11.16 | 10    | 5.35 | 12.71 | 12.94 | 8.99  | 8.59  | 7.68  |
| 8.79 | 4.89  | 10.78 | 5.56 | 10.32 | 9.82  | 6.82  | 7.43  | 7.48  |
| 8.27 | 12.71 | 10.75 | 5.04 | 8.36  | 9.06  | 8.07  | 9.32  | 7.57  |
| 8.29 | 12.59 | 10.53 | 5.56 | 8.42  | 8.98  | 8.41  | 9.21  | 7.21  |
| 8.28 | 12.32 | 9.99  | 6.34 | 8.39  | 8.98  | 8.15  | 9.1   | 7.02  |
| 8.77 | 11.84 | 10.18 | 6.76 | 7.01  | 8.55  | 7.98  | 8.32  | 7.74  |
| 8.62 | 11.91 | 9.45  | 6.71 | 9.27  | 9.56  | 7.69  | 8.21  | 7.2   |
| 8.94 | 12.15 | 10.06 | 6.61 | 9.37  | 9.71  | 8.04  | 8.61  | 7.52  |
| 8.87 | 11.56 | 9.71  | 7.05 | 8.34  | 9.11  | 7.44  | 8.86  | 7.12  |
| 8.15 | 3.35  | 9.35  | 7.27 | 6.86  | 8.07  | 7.5   | 6.92  | 7.69  |
| 8.1  | 10.83 | 8.78  | 3.64 | 10.64 | 11.58 | 8.99  | 8.16  | 7.2   |
| 8.09 | 11.65 | 9.06  | 4.2  | 8.41  | 10.04 | 9.13  | 8.79  | 7.42  |
| 8.21 | 11.26 | 9.01  | 3.64 | 10.52 | 11.36 | 8.57  | 8.68  | 7.1   |
| 7.7  | 10.06 | 9.79  | 4.69 | 6.17  | 8.53  | 5.87  | 8.57  | 6.84  |
| 7.86 | 11.03 | 9.39  | 4.1  | 6.89  | 8.33  | 7.26  | 8.52  | 7.04  |
| 7.67 | 10.13 | 8.78  | 4.07 | 7     | 8.91  | 6.91  | 7.66  | 7.07  |
| 7.72 | 10.16 | 9.15  | 4.14 | 9.92  | 10.05 | 6.85  | 7.7   | 6.99  |
| 7.47 | 10.19 | 7.74  | 6.13 | 6.41  | 8.48  | 7.61  | 7.35  | 6.5   |
| 7.58 | 10.52 | 7.35  | 6.24 | 7.26  | 8.76  | 7.86  | 7.57  | 6.51  |
| 7.7  | 10.13 | 7.15  | 6.12 | 7.17  | 8.33  | 7.79  | 7.48  | 6.39  |
| 7.43 | 10.94 | 7.4   | 5.65 | 6.08  | 8.52  | 7.78  | 7.54  | 6.31  |
| 8.93 | 7.9   | 9.27  | 4.86 | 4.45  | 8.53  | 6.86  | 8.18  | 7.18  |
| 7.74 | 9.89  | 8.78  | 5.17 | 9.59  | 9.62  | 8.15  | 8.54  | 7.26  |
| 7.81 | 8.34  | 8.85  | 4.46 | 8.44  | 9.4   | 8.19  | 8.03  | 7.24  |
| 7.63 | 8.23  | 8.59  | 3.27 | 11.31 | 11.03 | 8.48  | 7.78  | 7.19  |
| 8.22 | 8.86  | 10.71 | 5.44 | 9.2   | 9.82  | 9.27  | 7.59  | 8.36  |
| 8.22 | 9.71  | 10.33 | 4.4  | 8.12  | 9.96  | 9.33  | 7.89  | 8.67  |
| 8.1  | 7.68  | 10.45 | 4.4  | 8.19  | 9.32  | 9.01  | 7.65  | 8.65  |

<https://mc.manuscriptcentral.com/gut>

1  
2  
3  
4  
5  
6  
7  
8  
9  
10  
11  
12  
13  
14  
15  
16  
17  
18  
19  
20  
21  
22  
23  
24  
25  
26  
27  
28  
29  
30  
31  
32  
33  
34  
35  
36  
37  
38  
39  
40  
41  
42  
43  
44  
45  
46  
47  
48  
49  
50  
51  
52  
53  
54  
55  
56  
57  
58  
59  
60

|      |       |       |      |       |       |      |      |      |
|------|-------|-------|------|-------|-------|------|------|------|
| 8.21 | 9.41  | 10.01 | 5.17 | 10.51 | 10.98 | 9.09 | 7.68 | 8.55 |
| 8.51 | 7.72  | 10.59 | 6.7  | 6.2   | 8.46  | 8.01 | 8.67 | 7.49 |
| 8.37 | 8.02  | 10.28 | 7.19 | 6.85  | 8.94  | 7.79 | 8.47 | 7.66 |
| 8.18 | 9.67  | 10.32 | 6.75 | 7.26  | 8.58  | 7.98 | 8.59 | 7.87 |
| 8.29 | 7.44  | 9.88  | 6.77 | 10.58 | 10.3  | 7.81 | 8.17 | 7.81 |
| 8.41 | 9.96  | 9.96  | 5.36 | 7.08  | 9.25  | 7.75 | 8.84 | 7.84 |
| 8.34 | 11.22 | 9.94  | 3.05 | 9.73  | 10.17 | 8.21 | 9.2  | 7.85 |
| 8.58 | 11.58 | 10.16 | 3.53 | 6.46  | 8.53  | 7.54 | 9.71 | 8.17 |
| 8.58 | 10.88 | 9.96  | 4.25 | 11.74 | 11.69 | 8    | 9.17 | 7.63 |
| 8.32 | 9.87  | 8.17  | 5.51 | 4.9   | 7.41  | 8.67 | 8.76 | 7.17 |
| 8.51 | 11.49 | 8.19  | 5.13 | 8.02  | 8.58  | 8.72 | 9.09 | 7.13 |
| 8.75 | 10.73 | 8.15  | 5.27 | 6.9   | 8.1   | 8.85 | 8.93 | 7.22 |
| 8.69 | 10.1  | 8.3   | 5.44 | 11.29 | 10.62 | 8.59 | 9.07 | 7.26 |
| 9.32 | 8.85  | 10.06 | 7.47 | 5.15  | 8.32  | 9.61 | 9.47 | 7.74 |
| 8.49 | 10.29 | 10.86 | 7.96 | 6.77  | 9.43  | 8.56 | 9.02 | 7.58 |
| 8.36 | 9.47  | 10.12 | 7.62 | 6.96  | 9.1   | 7.9  | 8.27 | 7.6  |
| 8.72 | 2.24  | 9.29  | 9.82 | 8.24  | 10.01 | 9.4  | 7.97 | 8.57 |
| 8.58 | 3.77  | 9.19  | 9.65 | 7.8   | 9.06  | 9.27 | 8.03 | 8.21 |
| 8.33 | 10.98 | 9.88  | 6.51 | 5.84  | 7.67  | 8.5  | 8.96 | 8.09 |
| 8.32 | 11.49 | 10.02 | 6.17 | 5.55  | 7.42  | 8.91 | 8.82 | 8.05 |
| 8.38 | 10.78 | 9.96  | 6.82 | 6.91  | 8.43  | 8.39 | 8.77 | 7.82 |
| 8.05 | 10.06 | 9.46  | 4.56 | 9.48  | 9.84  | 9.7  | 8.58 | 7.2  |
| 8.12 | 10.97 | 8.94  | 5.74 | 10.67 | 10.39 | 9.71 | 8.38 | 7.27 |
| 8.03 | 8.83  | 8.28  | 6.41 | 10.74 | 10.73 | 9.47 | 8.63 | 7.16 |
| 8.56 | 13.52 | 9.72  | 4.96 | 8.66  | 9.8   | 8.89 | 9.7  | 8.33 |
| 8.57 | 13.44 | 9.99  | 5.33 | 8.11  | 10.24 | 8.71 | 9.36 | 8.41 |
| 8.21 | 13.28 | 9.73  | 4.39 | 8.31  | 10.47 | 8.6  | 9.1  | 8.52 |
| 8.89 | 9.77  | 10.91 | 6.91 | 6.72  | 8.72  | 8.31 | 7.97 | 7.65 |
| 8.9  | 8.36  | 11.08 | 6.9  | 8.16  | 9.44  | 8.43 | 7.45 | 7.41 |
| 8.88 | 8.48  | 10.88 | 6.96 | 9.05  | 9.56  | 8.38 | 7.71 | 7.52 |
| 8.4  | 7.74  | 9.93  | 7.01 | 8.53  | 9.16  | 8.91 | 8.52 | 7.71 |
| 8.55 | 8.6   | 9.52  | 7.3  | 9.22  | 9.68  | 8.93 | 8.38 | 7.59 |
| 8.59 | 8.2   | 8.97  | 7.59 | 7.5   | 9.15  | 8.92 | 8.65 | 7.41 |
| 8.38 | 11.89 | 8.93  | 6.89 | 9.29  | 10.13 | 8.42 | 8.32 | 7.51 |
| 8.44 | 12.13 | 9.08  | 6.74 | 8.12  | 9.32  | 8.14 | 8.63 | 7.7  |
| 8.3  | 12.16 | 9.1   | 7.37 | 9.07  | 10.15 | 8.47 | 8.34 | 7.51 |
| 8.39 | 10.14 | 9.06  | 7.36 | 7.22  | 9.08  | 8.58 | 7.58 | 7.45 |
| 8.39 | 10.14 | 9.06  | 7.36 | 7.22  | 9.08  | 8.58 | 7.58 | 7.45 |
| 8.2  | 11.68 | 8.49  | 7.25 | 10.76 | 10.78 | 8.73 | 8.31 | 7.6  |
| 8.45 | 11.12 | 8.9   | 7.05 | 11.93 | 11.45 | 8.67 | 8.4  | 7.43 |
| 8.17 | 11.22 | 8.33  | 7.03 | 10.36 | 10.63 | 9.12 | 8.08 | 7.57 |
| 8.29 | 9.22  | 8.13  | 7.14 | 6.82  | 8.38  | 7.86 | 7.86 | 7.24 |
| 8.14 | 12.06 | 7.81  | 6.85 | 9.5   | 10    | 8.47 | 8.07 | 7.03 |
| 8.12 | 12.5  | 7.97  | 6.14 | 9.01  | 9.25  | 8.63 | 8.31 | 7.14 |
| 8.24 | 11.14 | 7.75  | 6.78 | 11.33 | 11.23 | 8.17 | 8.33 | 7.38 |
| 8.25 | 10.92 | 8.98  | 5.66 | 7.72  | 9.84  | 9.09 | 8.23 | 7.19 |
| 8.41 | 11.02 | 9.24  | 5.5  | 6.31  | 8.68  | 8.87 | 8.54 | 7.26 |
| 8.18 | 10.61 | 9.19  | 5.52 | 7.73  | 9.76  | 8.5  | 8.25 | 6.94 |
| 8.07 | 6.71  | 8.55  | 7.38 | 6.32  | 8.4   | 7.78 | 7.61 | 7.26 |
| 8.12 | 9.21  | 8.63  | 7.3  | 10.4  | 11.09 | 8.15 | 7.57 | 7.2  |
| 8.02 | 9.08  | 8.51  | 7.07 | 11.36 | 11.93 | 8.35 | 7.81 | 7.07 |
| 8.06 | 11.86 | 7.77  | 6.04 | 7.89  | 9.1   | 8.57 | 7.69 | 7.33 |

<https://mc.manuscriptcentral.com/gut>

1  
2  
3  
4  
5  
6  
7  
8  
9  
10  
11  
12  
13  
14  
15  
16  
17  
18  
19  
20  
21  
22  
23  
24  
25  
26  
27  
28  
29  
30  
31  
32  
33  
34  
35  
36  
37  
38  
39  
40  
41  
42  
43  
44  
45  
46  
47  
48  
49  
50  
51  
52  
53  
54  
55  
56  
57  
58  
59  
60

|      |       |       |      |       |       |      |       |      |
|------|-------|-------|------|-------|-------|------|-------|------|
| 7.87 | 12.2  | 7.7   | 6.36 | 8.31  | 9.39  | 8.81 | 7.93  | 7.52 |
| 7.83 | 10.85 | 8.14  | 7.57 | 8.5   | 10.38 | 8.74 | 7.65  | 7.71 |
| 8.08 | 10.88 | 9.84  | 6.87 | 7.53  | 9.38  | 8.36 | 7.55  | 7.4  |
| 8.28 | 12.04 | 9.79  | 6.32 | 10.42 | 10.59 | 8.88 | 8.51  | 7.33 |
| 8.24 | 11.9  | 9.04  | 5.78 | 11.74 | 11.64 | 8.73 | 8.39  | 7.18 |
| 7.9  | 11.09 | 10.28 | 4.31 | 8.21  | 9.5   | 7.92 | 8.46  | 7.29 |
| 7.26 | 13    | 9.42  | 3.45 | 7.3   | 8.84  | 8.75 | 9     | 7.7  |
| 7.57 | 12.83 | 9.82  | 3.76 | 8.86  | 9.51  | 8.77 | 8.95  | 7.84 |
| 8.25 | 12.76 | 10.96 | 5.49 | 10.32 | 11.62 | 6.66 | 10.48 | 7.45 |
| 8.06 | 10.56 | 9.57  | 4.49 | 6.15  | 9.49  | 8.09 | 8.64  | 7.45 |
| 8.16 | 11.73 | 9.83  | 4.19 | 8.86  | 9.44  | 8.28 | 8.66  | 8.14 |
| 7.74 | 11.27 | 8.73  | 6.14 | 7.48  | 8.18  | 8.34 | 7.97  | 7.6  |
| 8.69 | 11.73 | 10.59 | 4.58 | 8.28  | 11.04 | 7.21 | 9.75  | 7.75 |
| 9    | 0.2   | 8.51  | 8.7  | 7.25  | 9.17  | 8.25 | 8.38  | 7.11 |
| 7.88 | 11.25 | 10.6  | 5.67 | 7.07  | 8.84  | 7.86 | 8.61  | 6.58 |
| 8.11 | 11.62 | 10.72 | 5.62 | 5.94  | 8.23  | 7.94 | 8.6   | 7.02 |
| 8.16 | 11.34 | 10.51 | 5.91 | 9.68  | 9.95  | 7.83 | 8.7   | 6.69 |
| 8    | 12.13 | 8.97  | 4.19 | 7.41  | 9.07  | 8.41 | 8.19  | 7.04 |
| 7.95 | 11.22 | 8.46  | 6.54 | 7.28  | 9.21  | 7.99 | 7.88  | 6.68 |
| 8.09 | 11.5  | 8.79  | 6.16 | 8.28  | 9.42  | 8.05 | 7.88  | 6.89 |
| 8.62 | 10.72 | 10.62 | 7.16 | 5.16  | 8.86  | 7.16 | 10.25 | 6.16 |
| 8.5  | 12.01 | 8.69  | 3.78 | 6.05  | 8.11  | 7.96 | 7.49  | 7.09 |
| 8.43 | 11.84 | 8.73  | 4.24 | 7.79  | 8.81  | 8.11 | 7.93  | 6.88 |
| 8.7  | 12.09 | 8.05  | 5.35 | 10.32 | 11.31 | 7.5  | 8.89  | 6.79 |
| 8.45 | 11.58 | 8.58  | 4.99 | 10.33 | 11.54 | 7.06 | 9.08  | 6.84 |
| 8.48 | 10.97 | 8.63  | 4.13 | 9.16  | 10.59 | 8.62 | 7.94  | 6.85 |
| 8.5  | 7.6   | 7.21  | 8.07 | 6.64  | 8.54  | 7.78 | 7.8   | 7.47 |
| 8.58 | 1.86  | 7.07  | 8.33 | 6.92  | 8.28  | 7.76 | 7.69  | 7.57 |
| 8.45 | 1.77  | 6.09  | 7.65 | 6.09  | 7.79  | 7.77 | 8.09  | 7.09 |
| 7.22 | 11.81 | 8.53  | 2.82 | 6.52  | 8.73  | 8.06 | 6.84  | 5.56 |
| 7.33 | 10.86 | 8.15  | 2.59 | 11.6  | 11.74 | 7.77 | 6.67  | 5.82 |
| 7.51 | 12.12 | 8.43  | 2.11 | 10.78 | 11.07 | 7.66 | 8.21  | 6.13 |
| 7.01 | 10.41 | 9.8   | 1.16 | 10.32 | 10.16 | 8.27 | 6.6   | 6.18 |
| 7.08 | 4.91  | 6.75  | 7.43 | 6.52  | 7.83  | 7.14 | 7.63  | 6.75 |
| 7.29 | 6.98  | 6.57  | 6.61 | 5.57  | 7.52  | 6.74 | 7.75  | 6.03 |
| 7.18 | 7.79  | 6.66  | 6.71 | 5.55  | 7.65  | 6.7  | 7.68  | 6.46 |
| 7.31 | 0     | 7.33  | 8.27 | 6.9   | 8.41  | 8.36 | 7.21  | 7.01 |
| 7.76 | 2.34  | 6.51  | 6.98 | 5.66  | 7.76  | 6.95 | 7.22  | 6.76 |
| 7.49 | 3.1   | 6.1   | 6.96 | 6.18  | 7.85  | 6.77 | 7.21  | 6.1  |
| 7.59 | 5.12  | 6.4   | 6.92 | 5.98  | 8.22  | 7.06 | 7.14  | 6.63 |
| 8    | 2.41  | 9.04  | 8.39 | 7.37  | 8.17  | 10.1 | 5.73  | 7.05 |
| 8.54 | 7.48  | 7.78  | 7.99 | 6.7   | 8.58  | 7.25 | 8.59  | 7.28 |
| 8.89 | 1.65  | 7.41  | 8.3  | 6.9   | 8.61  | 8.11 | 8.5   | 7.68 |
| 8.47 | 11.32 | 8.7   | 7.33 | 6.08  | 8.05  | 7.38 | 9.02  | 6.89 |
| 8.33 | 8.13  | 7.87  | 8.13 | 7     | 8.62  | 7.72 | 8.46  | 7.64 |
| 7.94 | 10.08 | 7.89  | 7.52 | 6.77  | 9.05  | 7.75 | 8.51  | 7.13 |
| 8.52 | 8.7   | 7.47  | 8.13 | 7.1   | 9.57  | 7.9  | 8.52  | 7.04 |
| 8.59 | 2.71  | 7.13  | 7.76 | 6.99  | 8.61  | 7.86 | 8.2   | 7.36 |
| 7.67 | 5.73  | 8.01  | 8.82 | 7.42  | 9.47  | 8.8  | 8.14  | 7.55 |
| 7.91 | 5.16  | 9.91  | 6.22 | 6.53  | 8     | 8.21 | 7.9   | 7.09 |
| 8.03 | 7.86  | 9.61  | 6.07 | 5.7   | 8.12  | 8.05 | 7.9   | 7.18 |
| 7.84 | 6.99  | 9.74  | 6.94 | 7.03  | 8.32  | 8.11 | 7.88  | 7.35 |

<https://mc.manuscriptcentral.com/gut>

1  
2  
3  
4  
5  
6  
7  
8  
9  
10  
11  
12  
13  
14  
15  
16  
17  
18  
19  
20  
21  
22  
23  
24  
25  
26  
27  
28  
29  
30  
31  
32  
33  
34  
35  
36  
37  
38  
39  
40  
41  
42  
43  
44  
45  
46  
47  
48  
49  
50  
51  
52  
53  
54  
55  
56  
57  
58  
59  
60

|      |       |       |      |       |       |      |       |      |
|------|-------|-------|------|-------|-------|------|-------|------|
| 8.06 | 5.36  | 9.64  | 7.14 | 5.88  | 7.88  | 8.16 | 7.84  | 7.25 |
| 8.79 | 12.23 | 8.04  | 6.93 | 7.7   | 9.71  | 8.17 | 9.12  | 7.68 |
| 8.95 | 12.41 | 7.88  | 6.91 | 8.67  | 9.96  | 8.13 | 9.55  | 7.77 |
| 8.75 | 12.68 | 6.76  | 8.21 | 5.6   | 8.78  | 7.88 | 9.27  | 7.46 |
| 8.81 | 12.75 | 6.62  | 7.52 | 6.2   | 8.72  | 7.98 | 9.28  | 7.78 |
| 8.94 | 11.09 | 9.19  | 7.47 | 7.13  | 9.28  | 8.61 | 7.61  | 7.7  |
| 9.19 | 13.5  | 10.52 | 5.75 | 8.85  | 10.38 | 8.03 | 8.39  | 8.14 |
| 9.29 | 13.48 | 10.02 | 6.21 | 9.23  | 9.93  | 8.26 | 8.11  | 7.89 |
| 9.15 | 12.35 | 10.02 | 5.33 | 13.02 | 13.25 | 7.67 | 8.36  | 8.03 |
| 7.85 | 12.55 | 9.54  | 5.89 | 7.42  | 10.1  | 9.01 | 8.79  | 7.8  |
| 7.7  | 12.42 | 9     | 6.23 | 10.6  | 11.02 | 8.98 | 8.22  | 8.54 |
| 7.85 | 12.18 | 9.05  | 6.22 | 10.31 | 10.95 | 8.88 | 8.11  | 8.45 |
| 7.71 | 12.62 | 9.53  | 5.82 | 11.43 | 11.51 | 9.05 | 8.71  | 8.84 |
| 8.65 | 11.71 | 8.27  | 6.43 | 7.3   | 8.83  | 8.8  | 7.51  | 6.73 |
| 8.85 | 12.8  | 8.74  | 4.26 | 8.72  | 9.2   | 9.24 | 7.94  | 7.23 |
| 8.56 | 11.17 | 8.81  | 5.73 | 11.82 | 12.23 | 8.15 | 7.91  | 6.85 |
| 8.01 | 10.31 | 8.95  | 5    | 8.33  | 9.25  | 8.01 | 7.71  | 7.45 |
| 8.15 | 11.86 | 9.58  | 5.57 | 9.33  | 10.02 | 8.54 | 9.17  | 7.56 |
| 8.46 | 11.1  | 9.12  | 3.69 | 12.59 | 12.68 | 8.07 | 8.54  | 7.21 |
| 8.05 | 9.31  | 9.89  | 4.51 | 7.61  | 9.07  | 8.81 | 8.18  | 7.22 |
| 7.56 | 5.5   | 10.71 | 4.83 | 7.24  | 9.71  | 8.89 | 8.43  | 7.29 |
| 7.6  | 5.43  | 10.19 | 5.06 | 6.78  | 8.83  | 8.91 | 8.44  | 6.76 |
| 8.29 | 10.99 | 7.76  | 6.06 | 9.88  | 10.07 | 8.14 | 8.52  | 7.32 |
| 8.48 | 11.16 | 7.3   | 6.29 | 9.54  | 10.1  | 7.8  | 8.59  | 7.5  |
| 8.44 | 10.42 | 11.23 | 6.47 | 12.47 | 13.47 | 6.96 | 9.98  | 7.74 |
| 7.81 | 8.38  | 9.06  | 4.36 | 6.34  | 8.32  | 6.57 | 6.06  | 6.53 |
| 7.78 | 9     | 8.64  | 5.31 | 9.37  | 9.66  | 7.79 | 7.2   | 6.04 |
| 8.22 | 8.59  | 8.98  | 4.62 | 5.7   | 8.45  | 7.8  | 6.88  | 6.03 |
| 8.5  | 8.22  | 9.09  | 3.9  | 11.99 | 12.42 | 8.48 | 6.94  | 5.9  |
| 7.78 | 1.76  | 7.01  | 7.28 | 6.01  | 7.71  | 7.18 | 6.97  | 6.51 |
| 7.6  | 7.94  | 7.09  | 7.13 | 5.67  | 8.02  | 6.79 | 7.13  | 6.21 |
| 7.65 | 2.47  | 6.69  | 7.59 | 5.93  | 7.47  | 7.56 | 6.72  | 6.31 |
| 7.78 | 4.28  | 5.96  | 7.51 | 5.71  | 7.61  | 7.19 | 7.17  | 6.28 |
| 7.18 | 11.12 | 6.94  | 5.55 | 5.8   | 7.55  | 7.18 | 7.68  | 6.54 |
| 7.25 | 9.91  | 6.2   | 6.18 | 8.41  | 8.69  | 6.79 | 7.43  | 6.42 |
| 7.08 | 9.99  | 6.29  | 6.38 | 9.22  | 9.24  | 7.16 | 7.21  | 6.51 |
| 7.1  | 9.74  | 7.6   | 6    | 9.4   | 9.61  | 7.29 | 6.74  | 6.37 |
| 8.12 | 4.26  | 9.62  | 5.48 | 7.72  | 8.48  | 6.14 | 5     | 7.95 |
| 8.22 | 10.85 | 9.49  | 6.67 | 8.88  | 9.99  | 8.31 | 8.28  | 6.82 |
| 8.37 | 13.08 | 9.25  | 4.42 | 7.2   | 8.61  | 7.92 | 9.56  | 7.31 |
| 8.86 | 12.02 | 10.54 | 4.23 | 7.28  | 9.97  | 5.82 | 10.33 | 7.72 |
| 8.03 | 10.72 | 9.99  | 6.5  | 6.99  | 8.78  | 8.38 | 7.91  | 7.15 |
| 8.9  | 11.86 | 10.18 | 6.1  | 9.68  | 11.15 | 7.1  | 10.1  | 7.51 |
| 8.24 | 11.68 | 9.34  | 4.82 | 9.8   | 10.29 | 8.49 | 8.51  | 7.54 |
| 8.18 | 11.74 | 9.32  | 4.84 | 11.59 | 11.67 | 8.53 | 8.29  | 7.46 |
| 7.79 | 9.2   | 10.39 | 5.21 | 3.27  | 7.07  | 8.17 | 7.82  | 7.16 |
| 7.99 | 9.42  | 11.03 | 6.43 | 10.55 | 10.95 | 7.82 | 7.44  | 7.11 |
| 8.14 | 9.14  | 11.05 | 5.8  | 10.56 | 10.8  | 8.1  | 7.64  | 7.34 |
| 7.96 | 8.52  | 10.49 | 6.87 | 10.97 | 11.02 | 7.83 | 7.32  | 7.19 |
| 7.29 | 9.58  | 9.35  | 3.66 | 6.76  | 9     | 7.52 | 7.69  | 6.98 |
| 6.92 | 8.8   | 7.37  | 5.28 | 10.05 | 9.81  | 7.9  | 7.63  | 7.11 |
| 7.01 | 8.75  | 7.86  | 5.83 | 9.34  | 9.34  | 7.59 | 7.69  | 6.48 |

<https://mc.manuscriptcentral.com/gut>

1  
2  
3  
4  
5  
6  
7  
8  
9  
10  
11  
12  
13  
14  
15  
16  
17  
18  
19  
20  
21  
22  
23  
24  
25  
26  
27  
28  
29  
30  
31  
32  
33  
34  
35  
36  
37  
38  
39  
40  
41  
42  
43  
44  
45  
46  
47  
48  
49  
50  
51  
52  
53  
54  
55  
56  
57  
58  
59  
60

|      |       |       |      |       |       |      |      |      |
|------|-------|-------|------|-------|-------|------|------|------|
| 7.46 | 9.16  | 8.8   | 0.79 | 12.46 | 12.5  | 7.27 | 8.73 | 7.04 |
| 7.46 | 10.64 | 9.63  | 5.91 | 8.19  | 9.39  | 7.54 | 7.01 | 6.14 |
| 6.96 | 8.07  | 8.94  | 5.49 | 7.11  | 8.23  | 6.61 | 7.01 | 6.2  |
| 6.83 | 8.12  | 8.55  | 5.35 | 7.37  | 8.61  | 6.66 | 7.22 | 6.46 |
| 7.84 | 6.55  | 7.66  | 7.46 | 6.8   | 9.88  | 6.08 | 7.84 | 6.08 |
| 7.59 | 9.08  | 10.67 | 4.47 | 7.05  | 7.89  | 7.86 | 7.77 | 7.27 |
| 7.63 | 8.6   | 9.65  | 5.54 | 6.67  | 7.22  | 7.64 | 8.53 | 7.04 |
| 7.8  | 8.64  | 9.74  | 5.48 | 6.37  | 7.03  | 7.39 | 8.61 | 6.91 |
| 8.18 | 1.27  | 6.25  | 7.63 | 6.13  | 7.87  | 7.31 | 7.65 | 7.04 |
| 7.58 | 10.27 | 7.91  | 6.77 | 8.69  | 9.06  | 7.33 | 7.91 | 6.66 |
| 7.53 | 10.01 | 8.83  | 4.94 | 5.74  | 8.53  | 8.14 | 7.79 | 7.45 |
| 7.52 | 10.59 | 7.98  | 6.25 | 11.01 | 10.92 | 8.36 | 8.07 | 6.7  |
| 7.71 | 10.62 | 8.41  | 5.21 | 11.29 | 11.43 | 7.93 | 8.55 | 7.41 |
| 7.5  | 9.56  | 8.68  | 6.23 | 9.79  | 10.04 | 8.41 | 7.33 | 6.83 |
| 8.69 | 14.24 | 10.99 | 2.54 | 7.07  | 9.7   | 4.54 | 9.23 | 6.71 |
| 8.31 | 11.05 | 9.55  | 5.8  | 7.1   | 8.43  | 7.3  | 7.12 | 6.28 |
| 7.93 | 9.92  | 8.66  | 6.49 | 8.2   | 8.39  | 7.73 | 7.05 | 6.14 |
| 8.32 | 11.26 | 9.7   | 5.43 | 7.23  | 8.65  | 7.21 | 6.95 | 6.48 |

1  
2  
3  
4  
5  
6  
7  
8  
9  
10  
11  
12  
13  
14  
15  
16  
17  
18  
19  
20  
21  
22  
23  
24  
25  
26  
27  
28  
29  
30  
31  
32  
33  
34  
35  
36  
37  
38  
39  
40  
41  
42  
43  
44  
45  
46  
47  
48  
49  
50  
51  
52  
53  
54  
55  
56  
57  
58  
59  
60

| NAP1L3 | NCAM1 | NCL   | NDNF | NDP  | NDRG1 | NF1   | NF2  | NFAT5 |
|--------|-------|-------|------|------|-------|-------|------|-------|
| 5.2    | 6.99  | 8.31  | 6.59 | 4.2  | 8.65  | 7.54  | 7.45 | 7.1   |
| 4.48   | 6.72  | 8.75  | 6.73 | 4.01 | 10.23 | 8.64  | 7.45 | 6.95  |
| 4.08   | 6.82  | 8.53  | 7.04 | 4.4  | 10.81 | 8.33  | 7.44 | 6.9   |
| 3.99   | 5.31  | 9.02  | 7.31 | 3.76 | 10.77 | 9.33  | 7.92 | 7.13  |
| 6.1    | 9.01  | 4.92  | 8.01 | 5.26 | 7.61  | 3.33  | 7.24 | 7.28  |
| 4.81   | 6.79  | 8.23  | 6.85 | 4.35 | 9.54  | 8.23  | 6.92 | 6.7   |
| 4.38   | 6.58  | 8.23  | 7.1  | 4.17 | 9.56  | 8.13  | 6.93 | 6.63  |
| 3.39   | 4.79  | 8.71  | 7.05 | 2.72 | 11.3  | 9.42  | 7.31 | 6.73  |
| 4.27   | 2.69  | 9.42  | 0.37 | 1.37 | 10.63 | 8.79  | 7.56 | 6.58  |
| 4      | 6.16  | 9.97  | 6.12 | 3.61 | 10.42 | 8.15  | 7    | 6.38  |
| 3.84   | 5.19  | 10.38 | 4.96 | 2.96 | 10.39 | 8.85  | 7.4  | 6.57  |
| 4      | 4.49  | 10.22 | 3.49 | 2.27 | 10.54 | 8.82  | 7.34 | 6.59  |
| 4.18   | 6.71  | 9.8   | 6.18 | 3.58 | 9.22  | 8.56  | 7.32 | 7.06  |
| 4.72   | 6.75  | 9.85  | 6.13 | 3.37 | 9.11  | 8.67  | 8    | 7.18  |
| 4.09   | 5.67  | 9.31  | 3.77 | 3.35 | 11.76 | 9.86  | 9.36 | 7.16  |
| 4.64   | 6.78  | 8.86  | 7.03 | 3.75 | 9.99  | 8.65  | 7.5  | 7.25  |
| 4.75   | 7.29  | 9.13  | 8.34 | 4.61 | 10.45 | 9     | 7.17 | 7.5   |
| 4.76   | 7.83  | 8.93  | 8.21 | 3.35 | 11.03 | 8.88  | 7.36 | 7.42  |
| 4.07   | 3.6   | 9.17  | 1.9  | 2.7  | 10.85 | 9.76  | 8.46 | 7.71  |
| 3.4    | 5.01  | 9.94  | 4.83 | 2.77 | 9.81  | 9.49  | 8.39 | 7.41  |
| 4.14   | 5.69  | 9.5   | 4.36 | 0.5  | 10.04 | 9.41  | 8.18 | 7.48  |
| 4.61   | 6.56  | 10.15 | 7.58 | 3.15 | 10.42 | 9.79  | 7.87 | 7.54  |
| 4.59   | 4.78  | 10.3  | 9    | 3.2  | 10.72 | 9.85  | 7.9  | 7.45  |
| 5.59   | 6.43  | 9.99  | 8.56 | 3.06 | 10.32 | 9.65  | 7.93 | 7.82  |
| 3.23   | 5.75  | 9.99  | 3.75 | 2.43 | 11.53 | 8.25  | 8.31 | 7.34  |
| 3.13   | 4.99  | 9.84  | 4.77 | 1.13 | 10.36 | 9.07  | 7.55 | 7.11  |
| 3.11   | 5.16  | 9.6   | 4.33 | 3.33 | 10.62 | 9.2   | 7.64 | 6.96  |
| 3.5    | 6.62  | 9.12  | 6.54 | 4.37 | 9.7   | 8.62  | 7.58 | 7.1   |
| 4.91   | 6.84  | 9.3   | 6.69 | 4.7  | 8.65  | 8.21  | 7.79 | 8.16  |
| 4.42   | 6.91  | 9.25  | 6.77 | 4.63 | 9.57  | 8.08  | 7.66 | 7.43  |
| 4.44   | 6.84  | 9.36  | 6.92 | 3.52 | 8.96  | 8.4   | 7.83 | 8.5   |
| 4.71   | 7.66  | 8.67  | 6.94 | 4.71 | 8.96  | 8.32  | 7.86 | 7.88  |
| 4.96   | 7.59  | 8.27  | 6.95 | 3.15 | 8.61  | 7.57  | 7.95 | 7.49  |
| 5.19   | 3.06  | 9.57  | 5.7  | 3.06 | 10.31 | 9.68  | 7.67 | 7.7   |
| 3.31   | 4.66  | 10    | 5.42 | 1.2  | 10.82 | 9.78  | 7.67 | 7.37  |
| 4.56   | 4.99  | 9.43  | 4.99 | 1.47 | 10.75 | 9.76  | 7.56 | 7.14  |
| 2.45   | 3.77  | 8.98  | 2.45 | 2.45 | 8.99  | 8.73  | 7.53 | 6.23  |
| 2.86   | 2.86  | 9.36  | 4.45 | 2.21 | 8.91  | 8.11  | 7.32 | 6.13  |
| 2.69   | 4.37  | 9.05  | 4.54 | 2.37 | 8.79  | 8.27  | 7.4  | 6.47  |
| 2.91   | 4.5   | 9.04  | 3.99 | 2.55 | 8.5   | 8.22  | 7.25 | 6.36  |
| 4.1    | 6.72  | 7.58  | 5.96 | 2.68 | 9.15  | 7.34  | 6.96 | 6.56  |
| 4.22   | 6.98  | 7.82  | 6.42 | 2.48 | 9.23  | 7.67  | 6.56 | 6.45  |
| 4.74   | 6.64  | 7.75  | 6.41 | 3.92 | 8.68  | 7.4   | 6.68 | 6.68  |
| 3.98   | 6.24  | 8.22  | 5.67 | 3.27 | 9.51  | 8.23  | 6.34 | 6.27  |
| 2.86   | 4.86  | 8.72  | 3.86 | 2.86 | 13.07 | 9.96  | 8.53 | 6.32  |
| 3.31   | 5.74  | 9.44  | 6.31 | 1.31 | 10.23 | 8.93  | 7.17 | 6.6   |
| 2.81   | 4.95  | 9.73  | 5.28 | 3.17 | 10.04 | 8.9   | 6.96 | 6.27  |
| 4.76   | 5.9   | 9.27  | 4.98 | 0    | 10    | 9.13  | 7.29 | 6.45  |
| 3.8    | 4.22  | 9.83  | 4.63 | 2.63 | 11.49 | 10.29 | 7.81 | 8.02  |
| 3.71   | 3.82  | 9.84  | 3.33 | 2.82 | 11    | 10.15 | 7.74 | 7.55  |
| 3.3    | 4.08  | 10.24 | 3.95 | 2.08 | 11.21 | 10.24 | 7.81 | 7.56  |

<https://mc.manuscriptcentral.com/gut>

|    |      |       |       |      |      |       |      |      |      |
|----|------|-------|-------|------|------|-------|------|------|------|
| 1  |      |       |       |      |      |       |      |      |      |
| 2  | 4.78 | 4.47  | 9.94  | 4.6  | 0.08 | 10.61 | 10.1 | 7.85 | 7.64 |
| 3  | 2.84 | 6.6   | 10.5  | 5.91 | 2.84 | 10.69 | 8.89 | 7.45 | 7.76 |
| 4  | 4.36 | 6.77  | 10.34 | 6.85 | 4.19 | 9.76  | 8.8  | 7.56 | 8.01 |
| 5  | 3.76 | 6.61  | 10.48 | 6.51 | 4.04 | 9.91  | 8.84 | 7.9  | 8.23 |
| 6  | 4.29 | 7.04  | 10.2  | 6.61 | 3.87 | 9.54  | 8.77 | 7.48 | 7.99 |
| 7  | 4.75 | 5.52  | 10.16 | 4.87 | 2.81 | 10.07 | 9.49 | 7.67 | 6.84 |
| 8  | 2.25 | 4.42  | 10.49 | 4.83 | 1.25 | 10.28 | 9.85 | 7.83 | 7.19 |
| 9  | 2.17 | 3     | 10.63 | 3    | 2.46 | 10.68 | 9.87 | 7.73 | 6.53 |
| 10 | 3.44 | 5.19  | 10.46 | 4.14 | 2.44 | 10.64 | 9.85 | 7.91 | 7.21 |
| 11 | 3.97 | 3.58  | 9.91  | 1.58 | 1.9  | 11.75 | 9.16 | 7.42 | 7.91 |
| 12 | 3.71 | 5.13  | 10.08 | 5.86 | 0.54 | 9.75  | 9.38 | 7.71 | 8.07 |
| 13 | 3.62 | 4.62  | 10.07 | 5.31 | 2.14 | 10.39 | 9.32 | 7.6  | 8.28 |
| 14 | 3.98 | 5.65  | 9.86  | 4.15 | 2.56 | 10.85 | 9.22 | 7.64 | 8.03 |
| 15 | 6.74 | 9.32  | 8.15  | 8.32 | 6.74 | 9.54  | 8.47 | 8.61 | 6.15 |
| 16 | 5.54 | 8.83  | 9     | 7.73 | 3.37 | 10.02 | 9.59 | 8.51 | 7.6  |
| 17 | 5.6  | 8.15  | 9.11  | 7.23 | 3.52 | 8.77  | 9.19 | 8.08 | 7.55 |
| 18 | 7.48 | 10.52 | 4.49  | 9.81 | 4.57 | 7.92  | 2.24 | 9.12 | 8.94 |
| 19 | 6.23 | 9.99  | 4.23  | 9.63 | 4.77 | 8.48  | 4.77 | 9.21 | 8.95 |
| 20 | 3.84 | 6.41  | 9.76  | 5.92 | 2.72 | 8.72  | 9.3  | 8.13 | 8.16 |
| 21 | 3.65 | 6.38  | 9.88  | 5.93 | 3.07 | 9.38  | 9.21 | 8.13 | 7.94 |
| 22 | 3.99 | 6.85  | 9.46  | 6.66 | 3.92 | 8.63  | 9.09 | 8.16 | 7.94 |
| 23 | 4.18 | 3.56  | 9.81  | 6.57 | 1.68 | 10.59 | 9.14 | 7.83 | 7.39 |
| 24 | 4.09 | 5.77  | 9.89  | 7.06 | 3.86 | 10.25 | 9.39 | 7.62 | 7.52 |
| 25 | 4.96 | 7.28  | 9.5   | 6.6  | 3.86 | 9.28  | 8.81 | 7.48 | 7.39 |
| 26 | 3.22 | 5.99  | 10.26 | 7.21 | 2.96 | 10.13 | 9.67 | 8.46 | 7.22 |
| 27 | 3.63 | 5.47  | 10.38 | 7.38 | 1.63 | 9.8   | 9.8  | 8.51 | 7.48 |
| 28 | 4.5  | 5.45  | 10.34 | 7.6  | 2.69 | 10.3  | 9.8  | 8.13 | 7.51 |
| 29 | 4.45 | 6.93  | 10.7  | 6.22 | 4.53 | 9.15  | 9.29 | 7.42 | 7.48 |
| 30 | 4.5  | 6.84  | 10.74 | 6.32 | 4.3  | 9.28  | 9.38 | 7.54 | 7.48 |
| 31 | 5.01 | 7.06  | 10.5  | 6.15 | 4.47 | 9.33  | 9.26 | 7.45 | 7.29 |
| 32 | 5.4  | 7.29  | 9.71  | 6.7  | 4.51 | 10.32 | 8.93 | 7.98 | 8.28 |
| 33 | 5.01 | 7.19  | 10.03 | 6.66 | 4.78 | 9.97  | 8.84 | 8.03 | 8.01 |
| 34 | 5.31 | 7.28  | 9.49  | 7.08 | 4.45 | 10.68 | 9.04 | 8.03 | 7.98 |
| 35 | 5.12 | 6.87  | 9.14  | 6.8  | 4.86 | 9.64  | 8.3  | 8.05 | 7.5  |
| 36 | 4.92 | 7.17  | 9.27  | 7.19 | 5.01 | 10.11 | 8.15 | 7.97 | 7.71 |
| 37 | 5.09 | 7.54  | 9.05  | 7.04 | 4.57 | 10.14 | 8.36 | 7.94 | 7.7  |
| 38 | 5.34 | 7.56  | 8.47  | 7.15 | 4.61 | 9.11  | 8.15 | 7.59 | 7.38 |
| 39 | 5.34 | 7.56  | 8.47  | 7.15 | 4.61 | 9.11  | 8.15 | 7.59 | 7.38 |
| 40 | 5.43 | 7.73  | 8.97  | 8.36 | 4.24 | 10.18 | 9.08 | 7.14 | 7.43 |
| 41 | 5.04 | 7.91  | 8.73  | 7.88 | 3.5  | 9.81  | 8.74 | 7.34 | 7.35 |
| 42 | 5.62 | 7.62  | 8.75  | 7.77 | 3.59 | 9.72  | 9.04 | 7.14 | 7.32 |
| 43 | 5.08 | 7.94  | 7.53  | 7.2  | 4.46 | 8.06  | 7.2  | 7.41 | 7.68 |
| 44 | 5.58 | 7.51  | 9.05  | 6.53 | 4.76 | 9.56  | 8.84 | 7.74 | 7.37 |
| 45 | 4.12 | 6.7   | 9.39  | 6.32 | 5.16 | 9.55  | 8.81 | 7.71 | 7.17 |
| 46 | 5.57 | 8.04  | 8.35  | 7.57 | 5.37 | 9.07  | 8.41 | 7.6  | 7.51 |
| 47 | 3.9  | 3.43  | 9.61  | 4.53 | 2.53 | 10.47 | 9.73 | 7.62 | 7.08 |
| 48 | 1.66 | 4.72  | 9.47  | 4.08 | 3.25 | 11.02 | 9.71 | 7.43 | 6.97 |
| 49 | 3.84 | 3.52  | 8.92  | 3.32 | 0.52 | 11    | 9.85 | 7.6  | 7.04 |
| 50 | 5.65 | 7.75  | 8.07  | 7.03 | 5.36 | 8.28  | 7.18 | 7.37 | 7.42 |
| 51 | 5.97 | 7.63  | 8.41  | 7.34 | 5.14 | 9.09  | 8.11 | 7.81 | 7.17 |
| 52 | 5.74 | 7.7   | 8.32  | 7.26 | 5.46 | 8.81  | 8    | 7.38 | 7.24 |
| 53 | 5.26 | 7.29  | 8.23  | 6.82 | 5.3  | 8.86  | 8.24 | 6.98 | 7.78 |

1  
2  
3  
4  
5  
6  
7  
8  
9  
10  
11  
12  
13  
14  
15  
16  
17  
18  
19  
20  
21  
22  
23  
24  
25  
26  
27  
28  
29  
30  
31  
32  
33  
34  
35  
36  
37  
38  
39  
40  
41  
42  
43  
44  
45  
46  
47  
48  
49  
50  
51  
52  
53  
54  
55  
56  
57  
58  
59  
60

|      |      |       |      |      |       |       |      |      |
|------|------|-------|------|------|-------|-------|------|------|
| 5.5  | 6.77 | 8.48  | 6.96 | 4.89 | 8.96  | 8.57  | 7.32 | 7.62 |
| 6.46 | 8.02 | 6.61  | 7.65 | 4.82 | 8.84  | 7.88  | 7.74 | 7.9  |
| 4.49 | 6.47 | 9.02  | 6.65 | 1.83 | 10.33 | 8.81  | 7.71 | 7.26 |
| 4.4  | 5.91 | 9.57  | 8.47 | 2.4  | 11.51 | 8.95  | 8.27 | 7.43 |
| 5.44 | 6.32 | 9.18  | 9.24 | 3.3  | 9.91  | 9.4   | 8.13 | 7.55 |
| 3.41 | 4.31 | 9.4   | 2.99 | 2.41 | 9.89  | 9.26  | 7.83 | 6.56 |
| 2.72 | 4.83 | 10.09 | 4.01 | 1.87 | 11.34 | 9.32  | 7.03 | 6.78 |
| 3.22 | 4.89 | 10.15 | 4.34 | 1.34 | 10.88 | 9.37  | 7.17 | 6.73 |
| 4.08 | 4.82 | 9.28  | 5.49 | 4.08 | 12.9  | 10.56 | 8.49 | 6.58 |
| 1.79 | 4.11 | 8.9   | 1.79 | 1.79 | 11.86 | 9.4   | 8.52 | 7.06 |
| 2.08 | 4.4  | 9.6   | 4.49 | 3.3  | 11.43 | 9.49  | 7.96 | 6.37 |
| 4.48 | 6.98 | 8.95  | 6.62 | 3.89 | 10.83 | 8.55  | 7.25 | 6.66 |
| 3.85 | 5.26 | 8.55  | 5.96 | 3.85 | 12.77 | 10.28 | 8.45 | 7.07 |
| 5.77 | 9.02 | 6.03  | 8.06 | 4.69 | 7.63  | 2.2   | 8.35 | 8.44 |
| 3.53 | 4.8  | 10.46 | 4.53 | 2.53 | 9.81  | 8.85  | 7.02 | 6.58 |
| 2.16 | 2.64 | 10.6  | 3.92 | 1.42 | 9.79  | 8.87  | 7.2  | 6.63 |
| 3.52 | 4.47 | 10.32 | 4.47 | 3.1  | 10.03 | 8.85  | 7.21 | 6.4  |
| 3.43 | 4.64 | 9.22  | 4.76 | 2.02 | 9.15  | 9.04  | 7.7  | 7.53 |
| 4.16 | 6.73 | 8.32  | 6.35 | 3.16 | 8.58  | 8.47  | 7.78 | 7.39 |
| 3.2  | 6.52 | 8.69  | 6.29 | 2.2  | 9.04  | 8.82  | 7.73 | 7.34 |
| 5.16 | 6.75 | 6.16  | 7.16 | 6.75 | 12.57 | 8.86  | 5.16 | 7.16 |
| 2.3  | 4.09 | 9.47  | 4.22 | 1.13 | 9.92  | 9.13  | 7.69 | 6.54 |
| 3.34 | 5.34 | 9.25  | 4.99 | 3.12 | 9.9   | 9.06  | 7.49 | 6.96 |
| 4.77 | 5.27 | 8.01  | 8.42 | 1.18 | 10.15 | 9.82  | 8.52 | 7.09 |
| 4.49 | 4.49 | 8.06  | 7.62 | 0.91 | 10.47 | 9.87  | 8.65 | 6.86 |
| 4.54 | 4.79 | 8.55  | 5.3  | 2.54 | 9.8   | 9.53  | 8.32 | 7.17 |
| 6.39 | 8.17 | 5.7   | 7.99 | 5.46 | 7.84  | 5.39  | 8.04 | 7.8  |
| 6.22 | 8.36 | 5.25  | 7.98 | 6.03 | 6.03  | 2.86  | 7.72 | 7.99 |
| 6.35 | 8.37 | 5.35  | 8    | 4.35 | 6.02  | 4.77  | 7.32 | 7.67 |
| 3.92 | 2.01 | 8.55  | 3.18 | 1.59 | 9.18  | 8.14  | 6.48 | 5.82 |
| 4.4  | 6.03 | 8.51  | 5.4  | 0    | 9.4   | 8.21  | 7.2  | 5.68 |
| 4.11 | 5.54 | 8.6   | 6.5  | 0.11 | 9.43  | 8.26  | 7.2  | 5.92 |
| 4.91 | 4.68 | 8.61  | 3.16 | 2.16 | 9.86  | 8.39  | 6.58 | 6.78 |
| 4.62 | 7.89 | 4.77  | 7.18 | 4.26 | 7.17  | 5.09  | 6.81 | 6.84 |
| 4.71 | 7.34 | 5.78  | 6.84 | 4.64 | 6.57  | 5.16  | 6.4  | 6.98 |
| 4.34 | 7.21 | 5.96  | 6.91 | 3.99 | 6.8   | 6.38  | 6.84 | 6.9  |
| 5.18 | 8.81 | 3.64  | 7.97 | 3.91 | 6.52  | 1.64  | 7.5  | 7.79 |
| 4.92 | 7.83 | 5.51  | 7.14 | 5.04 | 6.14  | 2.92  | 6.98 | 6.76 |
| 4.68 | 7.47 | 5.18  | 6.9  | 4.56 | 6.05  | 3.1   | 6.52 | 6.77 |
| 4.83 | 7.5  | 5.35  | 7.13 | 4.22 | 6.65  | 2.89  | 6.56 | 7.13 |
| 5    | 9.42 | 2.41  | 8.27 | 2.41 | 7.46  | 2.41  | 7.17 | 7.22 |
| 5.58 | 8.39 | 5.64  | 8.04 | 4.64 | 6.89  | 4.38  | 7.95 | 7.99 |
| 6.01 | 8.82 | 6.12  | 8.3  | 5.44 | 6.25  | 1.33  | 8.03 | 8.25 |
| 4.19 | 7.51 | 7.17  | 6.82 | 4.33 | 7.79  | 7.39  | 7.84 | 7.08 |
| 5.61 | 8.44 | 5.56  | 7.71 | 4.61 | 6.5   | 5.14  | 7.77 | 7.85 |
| 5.23 | 7.45 | 6.76  | 6.98 | 4.05 | 9.45  | 6.94  | 7.69 | 7.4  |
| 5.72 | 7.94 | 6.25  | 7.39 | 4.75 | 9.23  | 5.2   | 7.92 | 7.85 |
| 5.99 | 8.05 | 5.84  | 7.53 | 5.66 | 6.35  | 2.71  | 7.51 | 8.09 |
| 6.44 | 8.85 | 5.48  | 7.88 | 4.85 | 8.56  | 4.76  | 8.21 | 8.29 |
| 4.72 | 6.76 | 8.09  | 5.79 | 3.37 | 10.84 | 7.92  | 6.69 | 7.11 |
| 4.7  | 6.51 | 8.36  | 5.89 | 3.74 | 10.6  | 7.99  | 7.1  | 7.39 |
| 5.04 | 6.88 | 8.33  | 5.68 | 4.5  | 10.41 | 8.11  | 7.41 | 7.24 |

<https://mc.manuscriptcentral.com/gut>



|    |      |      |       |      |      |       |       |      |      |
|----|------|------|-------|------|------|-------|-------|------|------|
| 1  |      |      |       |      |      |       |       |      |      |
| 2  | 5.27 | 6.88 | 7.97  | 5.88 | 3.85 | 11.18 | 8.1   | 7.25 | 7.34 |
| 3  | 4.6  | 6.32 | 9.83  | 6.73 | 3.32 | 10.12 | 9.22  | 7.5  | 8.02 |
| 4  | 4.35 | 7.19 | 9.93  | 6.88 | 3.9  | 9.96  | 9.06  | 7.94 | 7.85 |
| 5  | 3.33 | 6.3  | 9.96  | 6.2  | 3.74 | 10.19 | 9.11  | 7.4  | 8.52 |
| 6  | 4.41 | 6.16 | 9.98  | 5.94 | 3.86 | 9.93  | 8.99  | 7.41 | 8.44 |
| 7  | 5.83 | 7.68 | 9.37  | 6.97 | 4.22 | 10.36 | 9.11  | 7.98 | 7.78 |
| 8  | 4.3  | 6.05 | 10.13 | 6.75 | 2.43 | 10.78 | 10.11 | 8.39 | 7.74 |
| 9  | 3.68 | 5.59 | 10.34 | 6.47 | 2.79 | 10.38 | 9.66  | 8    | 7.86 |
| 10 | 5.39 | 7.5  | 9.56  | 6.13 | 3.06 | 11.03 | 10.09 | 8.4  | 7.86 |
| 11 | 4.09 | 5.67 | 9.45  | 6.09 | 3.35 | 13.82 | 10.28 | 8.14 | 7.8  |
| 12 | 4.63 | 6.45 | 9.7   | 7.04 | 2.75 | 11.28 | 9.92  | 8.08 | 7.93 |
| 13 | 4.91 | 6    | 9.47  | 7.21 | 2.71 | 10.88 | 10.02 | 8.11 | 7.8  |
| 14 | 4.46 | 6.17 | 9.84  | 6.4  | 2.87 | 12.12 | 10.15 | 7.98 | 7.73 |
| 15 | 3.28 | 6.26 | 9.23  | 5.48 | 4.18 | 10.23 | 8.63  | 7.31 | 7.13 |
| 16 | 2.68 | 4.42 | 10    | 5.06 | 4.51 | 10.74 | 9.34  | 8    | 7.13 |
| 17 | 4.73 | 7.39 | 8.56  | 6.43 | 3.6  | 10.2  | 9.08  | 7.72 | 7.34 |
| 18 | 4.24 | 4.08 | 8.95  | 3.45 | 3.17 | 9.17  | 8.64  | 7.71 | 7.42 |
| 19 | 3.84 | 5.91 | 9.76  | 6.9  | 0.67 | 9.94  | 8.92  | 7.75 | 6.88 |
| 20 | 5.04 | 6.27 | 9.46  | 4.91 | 2.1  | 9.18  | 9.04  | 7.75 | 7.15 |
| 21 | 3.51 | 3.51 | 10.23 | 1.51 | 0    | 10.06 | 9.07  | 7.32 | 6.77 |
| 22 | 3.71 | 3.54 | 9.93  | 5.57 | 1.87 | 10.9  | 9.31  | 7.76 | 6.91 |
| 23 | 2.8  | 2.8  | 9.37  | 5.06 | 2.8  | 10.53 | 9.64  | 7.62 | 6.93 |
| 24 | 3.43 | 6.63 | 8.57  | 9.1  | 4.43 | 9.33  | 8.59  | 7.66 | 7.17 |
| 25 | 4.51 | 6.84 | 8.93  | 8.65 | 3.93 | 9.57  | 8.56  | 8.18 | 7.27 |
| 26 | 5.47 | 6.96 | 8.01  | 9.32 | 4.15 | 11.69 | 9.67  | 8.74 | 7.61 |
| 27 | 2.36 | 3.82 | 8.64  | 3.17 | 0.36 | 9.47  | 7.92  | 6.63 | 5.98 |
| 28 | 1.79 | 6.98 | 8.46  | 6.7  | 3.11 | 9.54  | 7.89  | 6.41 | 6.46 |
| 29 | 1.76 | 5.41 | 9.16  | 4.46 | 0.76 | 10.11 | 8.08  | 6.86 | 5.93 |
| 30 | 1.9  | 6.9  | 8.77  | 5.36 | 1.9  | 9.05  | 7.81  | 7.19 | 4.9  |
| 31 | 5.22 | 7.8  | 5.08  | 6.71 | 4.93 | 6.08  | 3.76  | 6.57 | 7.04 |
| 32 | 4.72 | 6.93 | 5.58  | 6.11 | 4.3  | 7.93  | 5.81  | 7.23 | 6.81 |
| 33 | 6.17 | 7.67 | 4.59  | 7.09 | 5.47 | 5.21  | 0.88  | 6.91 | 6.74 |
| 34 | 5.04 | 7.59 | 4.96  | 6.93 | 5.04 | 6.42  | 2.54  | 6.76 | 6.6  |
| 35 | 4.22 | 5.96 | 7.59  | 5.77 | 3.06 | 6.81  | 7.43  | 6.3  | 6.28 |
| 36 | 4.36 | 6.29 | 6.81  | 6.58 | 4.42 | 7.14  | 7.01  | 6.75 | 6.81 |
| 37 | 4.01 | 6.59 | 6.71  | 6.37 | 3.94 | 7.17  | 7.22  | 6.45 | 6.65 |
| 38 | 4.63 | 6.24 | 7.01  | 6.09 | 4.03 | 7.59  | 7.44  | 6.24 | 6.56 |
| 39 | 3.81 | 5.71 | 9.47  | 2.35 | 2.35 | 9.22  | 8.26  | 7.55 | 7.11 |
| 40 | 3.78 | 6.55 | 9.67  | 7.71 | 1.46 | 10.84 | 9.22  | 7.84 | 6.75 |
| 41 | 2.42 | 5.17 | 9.71  | 4.33 | 2    | 10.17 | 9.51  | 7.9  | 6.78 |
| 42 | 3.23 | 5.04 | 9.14  | 4.82 | 2.23 | 11.53 | 9.96  | 8.69 | 6.55 |
| 43 | 3.24 | 6.35 | 9.52  | 6.01 | 2.5  | 11.42 | 8.8   | 7.53 | 6.87 |
| 44 | 6.1  | 6.51 | 8.1   | 6.83 | 7.1  | 10.94 | 9.37  | 8.97 | 6.51 |
| 45 | 3.87 | 4.62 | 10.1  | 6.06 | 1.87 | 10    | 8.99  | 7.76 | 6.76 |
| 46 | 3.74 | 5.94 | 9.87  | 4.26 | 0.94 | 9.81  | 9.02  | 7.68 | 6.76 |
| 47 | 0.68 | 2.27 | 10.35 | 2.68 | 5.27 | 12.65 | 9.4   | 6.81 | 6.59 |
| 48 | 3.98 | 6.58 | 9.89  | 6.17 | 2.98 | 11.5  | 9.08  | 7.2  | 6.9  |
| 49 | 3.28 | 5.36 | 10.36 | 5.28 | 3.28 | 11.8  | 9.13  | 7.29 | 6.54 |
| 50 | 4.16 | 7.21 | 10.09 | 6.23 | 3.26 | 11.37 | 8.62  | 7.34 | 6.78 |
| 51 | 3.74 | 3.89 | 8.96  | 4.66 | 2.16 | 8.45  | 8.37  | 6.65 | 5.43 |
| 52 | 4.34 | 6.48 | 7.89  | 7.19 | 3.53 | 8.19  | 8.07  | 6.46 | 6.34 |
| 53 | 3.92 | 6.02 | 7.75  | 7.02 | 3.16 | 8.4   | 7.77  | 6.24 | 6.1  |

1  
2  
3  
4  
5  
6  
7  
8  
9  
10  
11  
12  
13  
14  
15  
16  
17  
18  
19  
20  
21  
22  
23  
24  
25  
26  
27  
28  
29  
30  
31  
32  
33  
34  
35  
36  
37  
38  
39  
40  
41  
42  
43  
44  
45  
46  
47  
48  
49  
50  
51  
52  
53  
54  
55  
56  
57  
58  
59  
60

|      |      |      |      |      |       |      |      |      |
|------|------|------|------|------|-------|------|------|------|
| 2.79 | 6.65 | 8.01 | 5.88 | 0.79 | 9.07  | 8.71 | 6.83 | 6.22 |
| 3.42 | 6.14 | 8.13 | 5.19 | 3.1  | 9.84  | 7.74 | 7.01 | 5.8  |
| 2.59 | 6.26 | 8.84 | 6.37 | 2.91 | 9.29  | 7.7  | 6.54 | 6.2  |
| 3.07 | 5.29 | 8.84 | 6.22 | 2.49 | 8.33  | 7.73 | 6.79 | 6.24 |
| 3.88 | 8.15 | 5.14 | 7.84 | 4.14 | 9.25  | 6.31 | 6.76 | 7.31 |
| 1.57 | 3.37 | 9.77 | 2.15 | 1.15 | 10.34 | 8.14 | 6.68 | 5.97 |
| 1.87 | 3.71 | 9.83 | 2.39 | 1.07 | 8.65  | 8.35 | 6.87 | 5.49 |
| 0.94 | 3.44 | 9.85 | 1.94 | 0.94 | 8.52  | 8.39 | 6.8  | 5.54 |
| 4.97 | 7.88 | 5.48 | 7.85 | 3.97 | 5.52  | 1.27 | 7.09 | 7.08 |
| 4.52 | 7.28 | 7.28 | 6.7  | 3.72 | 8.65  | 7.04 | 6.81 | 6.74 |
| 4.61 | 3.74 | 8.37 | 1.97 | 1.24 | 9.79  | 8.81 | 7.06 | 6.55 |
| 4.7  | 6.38 | 8.55 | 6.17 | 2.89 | 9.01  | 8.41 | 7.04 | 6.59 |
| 3.89 | 5.95 | 8.14 | 6.53 | 1.89 | 9.86  | 8.89 | 7.37 | 6.55 |
| 4.77 | 5.91 | 8.26 | 5.59 | 2.45 | 9.66  | 8.41 | 7.17 | 6.45 |
| 2.54 | 4.54 | 7.19 | 4.13 | 2.54 | 12.38 | 9.94 | 7.71 | 5.35 |
| 2.8  | 6.19 | 9.05 | 5.56 | 1.8  | 10.35 | 8.92 | 7.47 | 6.23 |
| 4.32 | 6.61 | 8.43 | 6.07 | 3.04 | 9.36  | 7.91 | 6.98 | 6.26 |
| 3.75 | 4.96 | 9.18 | 5.04 | 1.34 | 10.78 | 9.37 | 7.67 | 6.26 |

1  
2  
3  
4  
5  
6  
7  
8  
9  
10  
11  
12  
13  
14  
15  
16  
17  
18  
19  
20  
21  
22  
23  
24  
25  
26  
27  
28  
29  
30  
31  
32  
33  
34  
35  
36  
37  
38  
39  
40  
41  
42  
43  
44  
45  
46  
47  
48  
49  
50  
51  
52  
53  
54  
55  
56  
57  
58  
59  
60

| NFATC2 | NFKB1 | NID2 | NME1  | NME4 | NODAL | NOS2 | NOS3 | NOTCH1 |
|--------|-------|------|-------|------|-------|------|------|--------|
| 8.63   | 6.69  | 6.89 | 7.51  | 7.18 | 7.04  | 1.88 | 5.71 | 6.73   |
| 7.75   | 6.56  | 8.17 | 7.91  | 7.13 | 6.28  | 7.64 | 6.56 | 7.69   |
| 7.71   | 5.92  | 8.05 | 7.57  | 6.99 | 6.7   | 5.67 | 6.64 | 7.47   |
| 7.93   | 6.55  | 9.23 | 8.04  | 7.06 | 3.35  | 6.13 | 7.47 | 8.19   |
| 8.79   | 6.56  | 4.33 | 7.5   | 8.58 | 8.4   | 1.01 | 6.37 | 7.01   |
| 8.06   | 5.98  | 7.91 | 8.17  | 7.24 | 6.69  | 5.27 | 5.92 | 7.32   |
| 8.08   | 6.26  | 7.98 | 8.41  | 7.34 | 6.36  | 4.78 | 5.75 | 7.03   |
| 8.8    | 6.3   | 9.6  | 9.14  | 6.68 | 0.39  | 5.52 | 6.3  | 7.86   |
| 8.62   | 6.39  | 8.51 | 8.33  | 6.27 | 2.95  | 1.95 | 6.2  | 7.75   |
| 7.6    | 6.49  | 7.51 | 8.46  | 7.69 | 5.91  | 2.49 | 5.77 | 6.72   |
| 8.01   | 6.4   | 8.14 | 9.17  | 6.89 | 2.7   | 5.63 | 5.9  | 7.21   |
| 8.44   | 6.91  | 8.65 | 8.86  | 7.58 | 0.68  | 4    | 6.49 | 7.9    |
| 8.88   | 6.29  | 7.37 | 8.77  | 7.22 | 6.09  | 6.37 | 5.68 | 8.57   |
| 8.9    | 6.32  | 8.34 | 8.78  | 7.53 | 6.74  | 4.43 | 6.39 | 8.25   |
| 9.62   | 5.47  | 9.91 | 8.84  | 7.05 | 2.77  | 4.35 | 6.16 | 9.56   |
| 8.87   | 7.11  | 7.75 | 8.23  | 7.4  | 6.97  | 5.47 | 6.75 | 7.92   |
| 8.87   | 6.46  | 8.27 | 8.16  | 7.29 | 6.65  | 3.29 | 6.46 | 7.27   |
| 8.53   | 6.22  | 8.67 | 8.15  | 8.24 | 7.46  | 3.08 | 6.57 | 7.43   |
| 10.82  | 7.16  | 9.35 | 8.56  | 5.6  | 1.9   | 2.22 | 7.4  | 8.82   |
| 9.55   | 7.23  | 8.31 | 9.65  | 6.13 | 1.89  | 4.67 | 7.12 | 8.05   |
| 10.17  | 7.28  | 8.78 | 9.01  | 6.51 | 1.08  | 2.82 | 7.35 | 8.76   |
| 8.94   | 6.67  | 8.21 | 9.36  | 8.15 | 4.15  | 2.96 | 6.54 | 7.77   |
| 9.1    | 6.71  | 7.87 | 9.67  | 8.23 | 1.78  | 3.9  | 6.48 | 7.97   |
| 8.86   | 6.61  | 7.79 | 9.19  | 8.32 | 1.48  | 2.89 | 6.45 | 7.72   |
| 8.95   | 5.56  | 6.98 | 9.62  | 9.27 | 9.23  | 2.75 | 5.07 | 7.1    |
| 7.74   | 6.73  | 7.19 | 10.47 | 7.63 | 2.13  | 6.06 | 5.94 | 6.86   |
| 7.81   | 5.88  | 7.23 | 10.14 | 7.91 | 3.52  | 6.4  | 5.81 | 7.37   |
| 8.38   | 6.37  | 6.82 | 9.48  | 7.62 | 6.32  | 5.72 | 5.94 | 7.24   |
| 8.12   | 6.17  | 6.14 | 8.69  | 8.15 | 6.76  | 3.4  | 5.89 | 7.66   |
| 8.12   | 6.36  | 7.26 | 8.34  | 7.53 | 6.75  | 4.9  | 6.28 | 7.54   |
| 7.77   | 5.92  | 7.32 | 8.63  | 8.19 | 6.67  | 3.2  | 6.44 | 8.44   |
| 8.42   | 5.99  | 7.55 | 8.26  | 7.99 | 7.45  | 1.71 | 6.54 | 8.07   |
| 9.11   | 6.82  | 5.3  | 6.98  | 7.4  | 7.26  | 4.39 | 6.44 | 7.91   |
| 11.2   | 6.25  | 9.31 | 9.35  | 7.67 | 2.38  | 4.15 | 6.7  | 8.84   |
| 11.35  | 6.41  | 8.94 | 9.92  | 7.42 | 3.2   | 3.86 | 6.44 | 8.81   |
| 11.4   | 5.72  | 9.15 | 9.13  | 7.07 | 1.47  | 2.06 | 7.09 | 8.75   |
| 9.27   | 6.6   | 6.73 | 9.25  | 6.33 | 0.45  | 4.62 | 5.4  | 7.61   |
| 8.59   | 6.7   | 7.25 | 9.26  | 5.71 | 2.21  | 6.74 | 5.02 | 7.2    |
| 9.11   | 6.58  | 7.92 | 8.79  | 6.27 | 4.07  | 5.45 | 5.45 | 7.63   |
| 9.28   | 6.51  | 7.31 | 8.65  | 6.28 | 1.74  | 5.83 | 5.24 | 7.44   |
| 7.77   | 5.44  | 6.97 | 7.23  | 6.9  | 6.68  | 2.68 | 6.02 | 7.67   |
| 7.74   | 5.9   | 7.4  | 7.45  | 6.84 | 6.32  | 2.22 | 5.7  | 7.79   |
| 7.85   | 5.61  | 6.99 | 7.09  | 6.61 | 6.35  | 1.8  | 5.77 | 7.81   |
| 7.73   | 5.62  | 7.57 | 7.67  | 6.57 | 5.67  | 2.4  | 5.1  | 8.49   |
| 9.81   | 4.45  | 9.01 | 9.83  | 6.86 | 2.86  | 5.86 | 6.18 | 6.86   |
| 8.18   | 6.48  | 7.07 | 8.7   | 7.1  | 3.12  | 3.12 | 4.4  | 7.51   |
| 8.13   | 6.36  | 8.05 | 8.91  | 7.31 | 2.32  | 3.58 | 5.78 | 7.61   |
| 8.61   | 6.35  | 8.74 | 8.6   | 7.35 | 2.39  | 1.81 | 5.56 | 7.56   |
| 10.3   | 7.11  | 8.39 | 9.36  | 7.93 | 3.44  | 8.44 | 6.7  | 8.23   |
| 8.53   | 7.84  | 8.92 | 9.87  | 8.11 | 1.01  | 7.83 | 6.62 | 8.23   |
| 8.77   | 7.67  | 8.15 | 9.8   | 7.93 | 2.08  | 8.56 | 5.92 | 7.67   |

<https://mc.manuscriptcentral.com/gut>

1  
2  
3  
4  
5  
6  
7  
8  
9  
10  
11  
12  
13  
14  
15  
16  
17  
18  
19  
20  
21  
22  
23  
24  
25  
26  
27  
28  
29  
30  
31  
32  
33  
34  
35  
36  
37  
38  
39  
40  
41  
42  
43  
44  
45  
46  
47  
48  
49  
50  
51  
52  
53  
54  
55  
56  
57  
58  
59  
60

|      |      |      |       |      |      |      |      |      |
|------|------|------|-------|------|------|------|------|------|
| 9.01 | 7.55 | 8.84 | 9.68  | 7.97 | 2.66 | 7.26 | 6.78 | 8.22 |
| 8.43 | 6.37 | 6.97 | 9.79  | 7.36 | 6.3  | 2.62 | 6.72 | 8.26 |
| 8.97 | 6.71 | 8.14 | 9.9   | 7.7  | 6.14 | 3    | 6.82 | 8.82 |
| 8.6  | 6.74 | 7.91 | 10.03 | 7.56 | 6.33 | 2.54 | 6.29 | 8.39 |
| 8.73 | 6.38 | 7.27 | 9.77  | 7.67 | 6.08 | 2.97 | 6.18 | 8.63 |
| 9.16 | 7.11 | 7.32 | 9.29  | 7.63 | 4.98 | 3.55 | 6.18 | 7.9  |
| 8.45 | 6.76 | 8.34 | 9.98  | 8.02 | 3.71 | 3.95 | 6.18 | 7.74 |
| 8.33 | 6.93 | 7.55 | 10.39 | 7.75 | 2.81 | 3.32 | 5.34 | 7.39 |
| 8.68 | 6.59 | 8.05 | 10.19 | 8.17 | 2.44 | 4.02 | 6.05 | 8.17 |
| 8.49 | 6.73 | 7.07 | 8.42  | 8.03 | 1.17 | 2.17 | 5.46 | 8.64 |
| 8.41 | 7.2  | 7.57 | 8.98  | 7.36 | 2.13 | 3.13 | 5.93 | 8.39 |
| 7.73 | 6.75 | 7.58 | 9.06  | 7.89 | 2.62 | 4.14 | 5.31 | 8.3  |
| 7.93 | 6.79 | 7.39 | 8.89  | 7.68 | 1.56 | 3.3  | 5.53 | 8.51 |
| 8.32 | 5.15 | 7.74 | 7.47  | 8.85 | 7.47 | 6.15 | 6.15 | 8.74 |
| 8.58 | 6.92 | 8.81 | 8.5   | 8.21 | 7.93 | 5.79 | 6.9  | 8.16 |
| 8.54 | 6.62 | 8.14 | 8.56  | 7.8  | 7.77 | 5.34 | 6.37 | 7.38 |
| 9.22 | 6.8  | 4.41 | 7.84  | 9.78 | 9.8  | 2.24 | 7.87 | 8.69 |
| 9.31 | 7.02 | 4.48 | 7.87  | 9.09 | 9.59 | 3.36 | 8    | 8.72 |
| 7.91 | 6.51 | 7.47 | 9.66  | 7.31 | 6.63 | 4.14 | 5.69 | 8.54 |
| 8.36 | 6.56 | 6.96 | 9.52  | 7.29 | 6.19 | 6.56 | 5.93 | 8.4  |
| 8.28 | 6.37 | 7.12 | 9.24  | 7.37 | 6.86 | 5.74 | 6.15 | 8.46 |
| 8.47 | 7.08 | 8.36 | 9.01  | 6.1  | 1.68 | 3.74 | 6.74 | 8.78 |
| 7.99 | 6.69 | 7.69 | 8.64  | 6.85 | 5.09 | 3.74 | 6.75 | 8.55 |
| 8.23 | 6.8  | 7.46 | 7.94  | 7.62 | 7.26 | 3.05 | 6.22 | 7.75 |
| 9.06 | 7.19 | 8.64 | 9.7   | 8.85 | 4.34 | 4.54 | 6.54 | 7.77 |
| 8.61 | 7.47 | 9.3  | 9.94  | 9.48 | 4.9  | 5.21 | 6.52 | 8.11 |
| 8.21 | 7.23 | 9.69 | 9.86  | 9.51 | 1.69 | 6.18 | 6.28 | 8.31 |
| 8.03 | 6.09 | 7.71 | 10.05 | 8.19 | 6.85 | 6.11 | 6.22 | 7.23 |
| 7.9  | 5.65 | 8.1  | 9.93  | 8.09 | 6.8  | 5.47 | 6.42 | 7.12 |
| 8.15 | 5.61 | 7.87 | 9.61  | 8.14 | 7    | 5.51 | 6.06 | 7.23 |
| 9.37 | 6.99 | 7.62 | 8.66  | 7.75 | 7.33 | 7.73 | 6.76 | 8.68 |
| 8.97 | 6.86 | 7.55 | 9     | 7.77 | 6.87 | 7.94 | 6.8  | 8.33 |
| 9.12 | 6.82 | 7.47 | 8.67  | 7.48 | 7.51 | 8.26 | 6.72 | 8.42 |
| 8.15 | 6.9  | 8.26 | 8.81  | 8.62 | 6.7  | 2.9  | 6.46 | 7.01 |
| 8.45 | 6.89 | 7.92 | 9.07  | 8.52 | 6.79 | 2.2  | 6.24 | 6.93 |
| 8.75 | 7.03 | 8.54 | 8.7   | 8.8  | 6.93 | 3.73 | 6.46 | 7.46 |
| 9.3  | 6.79 | 7.72 | 8.05  | 7.41 | 7.26 | 0.44 | 6.5  | 7.14 |
| 9.3  | 6.79 | 7.72 | 8.05  | 7.41 | 7.26 | 0.44 | 6.5  | 7.14 |
| 8.28 | 6.22 | 7.32 | 8.68  | 8.08 | 6.96 | 2.15 | 6.67 | 7.23 |
| 9.1  | 6.64 | 7.46 | 8.17  | 7.81 | 7.28 | 3.5  | 6.48 | 7.01 |
| 8.86 | 6.48 | 8.51 | 8.11  | 7.8  | 7.15 | 0.69 | 6.45 | 7.23 |
| 8.93 | 6.78 | 5.01 | 7.63  | 7.76 | 7.53 | 3.73 | 6.66 | 7.2  |
| 8.88 | 6.51 | 7.3  | 9.04  | 7.55 | 6.81 | 2.3  | 6.25 | 7.49 |
| 9.09 | 6.1  | 7.51 | 9.42  | 7.84 | 6.25 | 0.95 | 6.44 | 6.89 |
| 8.79 | 6.44 | 7.21 | 8.22  | 8.03 | 7.09 | 2.2  | 6.49 | 7.2  |
| 8.62 | 6.52 | 8.91 | 9.58  | 7.08 | 3.31 | 5.51 | 5.66 | 8.86 |
| 8.33 | 6.8  | 8.43 | 9.65  | 6.97 | 0.08 | 4.83 | 5.47 | 8.32 |
| 8.81 | 6.4  | 9.73 | 8.91  | 6.84 | 2.52 | 5.98 | 5.73 | 8.86 |
| 8.66 | 6.6  | 6.94 | 7.61  | 7.69 | 7.34 | 3.32 | 6.18 | 7.18 |
| 8.27 | 6.22 | 8.44 | 7.49  | 7.99 | 7.23 | 5.57 | 6.55 | 7.42 |
| 7.69 | 6.78 | 7.96 | 7.45  | 8.19 | 7.16 | 4.78 | 6.41 | 7.35 |
| 7.94 | 5.86 | 7.62 | 8.04  | 7.08 | 7.22 | 1.98 | 5.04 | 6.51 |

<https://mc.manuscriptcentral.com/gut>

|    |      |      |       |       |      |      |      |      |      |
|----|------|------|-------|-------|------|------|------|------|------|
| 1  |      |      |       |       |      |      |      |      |      |
| 2  | 7.85 | 6.21 | 8.29  | 8.3   | 7.2  | 6.63 | 2.47 | 5.59 | 6.98 |
| 3  | 8.34 | 6.41 | 8.68  | 7.57  | 8.04 | 7.86 | 2.36 | 6.1  | 6.72 |
| 4  | 9.36 | 6.67 | 7.41  | 8.3   | 6.87 | 6.12 | 4.6  | 6.35 | 7.59 |
| 5  | 8.19 | 6.66 | 8.54  | 8.76  | 7.46 | 5.25 | 2.4  | 6.29 | 7.78 |
| 6  | 8.13 | 6.13 | 9.13  | 8.2   | 7.84 | 4.88 | 2.81 | 6.35 | 7.66 |
| 7  | 9.15 | 7.02 | 8.47  | 9.55  | 6.58 | 1.41 | 3.73 | 6.13 | 8.03 |
| 8  | 7.95 | 7.01 | 8.17  | 9.74  | 7.36 | 2.36 | 3.01 | 4.83 | 7.05 |
| 9  | 7.53 | 7.36 | 8.34  | 10.02 | 7.43 | 2.76 | 3.93 | 7.08 | 7.35 |
| 10 | 8.78 | 6.49 | 10.03 | 9.37  | 6.66 | 3.49 | 4.49 | 7.35 | 8.38 |
| 11 | 9.08 | 6.52 | 8.38  | 7.9   | 6.84 | 3.11 | 2.79 | 6.25 | 8.59 |
| 12 | 8.3  | 6.16 | 8.18  | 8.57  | 7.88 | 2.08 | 3.66 | 3.81 | 8.86 |
| 13 | 8.09 | 6.27 | 7.04  | 8.13  | 7.76 | 6.06 | 3.59 | 5.75 | 7.57 |
| 14 | 8.92 | 6.17 | 10.89 | 8.41  | 7.21 | 4.26 | 4.85 | 6.26 | 9.27 |
| 15 | 9.82 | 6.07 | 2.66  | 7.74  | 8.53 | 9.28 | 2.01 | 7.1  | 7.49 |
| 16 | 7.83 | 5.37 | 8.2   | 9.49  | 7.89 | 4.99 | 9.25 | 5.37 | 8.4  |
| 17 | 7.86 | 5.39 | 8.21  | 9.65  | 7.97 | 3.64 | 9.32 | 5.45 | 8.12 |
| 18 | 7.89 | 5.71 | 7.68  | 9.42  | 7.86 | 4.16 | 8.59 | 5.5  | 8.27 |
| 19 | 9.34 | 6.56 | 8.14  | 8.73  | 6.95 | 1.43 | 7.26 | 5.52 | 7.37 |
| 20 | 8.69 | 6.03 | 8.37  | 7.89  | 7.23 | 6.76 | 3.86 | 5.64 | 6.75 |
| 21 | 9.13 | 6.33 | 8.46  | 8.22  | 7.18 | 5.92 | 2.85 | 5.93 | 7.09 |
| 22 | 9.25 | 5.16 | 10.62 | 5.16  | 7.16 | 6.16 | 6.16 | 5.16 | 7.97 |
| 23 | 8.66 | 6.61 | 7.71  | 8.84  | 8.24 | 3.66 | 3.13 | 4.78 | 6.42 |
| 24 | 8.63 | 6.8  | 7.94  | 8.24  | 7.78 | 2.54 | 5.06 | 4.86 | 6.98 |
| 25 | 7.99 | 6.18 | 8.7   | 8.37  | 7.09 | 1.18 | 3.77 | 5.43 | 7.82 |
| 26 | 8.41 | 6.23 | 9.62  | 8.37  | 7.04 | 0.91 | 3.23 | 6.4  | 8.41 |
| 27 | 8.8  | 6.19 | 9.96  | 8.26  | 7.13 | 2.13 | 3.71 | 6.27 | 8.07 |
| 28 | 8.98 | 6.39 | 5     | 7.55  | 7.66 | 8.46 | 1    | 6.78 | 6.35 |
| 29 | 8.41 | 6.88 | 1.86  | 6.99  | 8.01 | 8.4  | 1.86 | 6.74 | 6.61 |
| 30 | 8.37 | 6.47 | 2.77  | 6.85  | 8.11 | 7.85 | 2.77 | 6.77 | 6.09 |
| 31 | 8.05 | 4.92 | 7.62  | 7.15  | 6.14 | 0.01 | 3.01 | 5.84 | 6.74 |
| 32 | 7.26 | 5.72 | 8.75  | 6.91  | 6.96 | 0.59 | 1.91 | 5.97 | 7.21 |
| 33 | 7.73 | 4.86 | 8.07  | 7.63  | 6.55 | 1.11 | 1.11 | 6.04 | 7.31 |
| 34 | 9.38 | 6.31 | 8.83  | 6.91  | 6.58 | 1.74 | 1.16 | 6.22 | 7.13 |
| 35 | 8.02 | 5.88 | 5.15  | 6.6   | 7.54 | 7.41 | 0.45 | 6.18 | 5.91 |
| 36 | 7.95 | 6.13 | 3.71  | 6.69  | 6.79 | 7.34 | 0.25 | 5.54 | 5.54 |
| 37 | 8.33 | 5.49 | 5.25  | 7.06  | 6.84 | 7.08 | 2.67 | 5.53 | 6.04 |
| 38 | 8.02 | 5.89 | 2.49  | 6.59  | 8.26 | 8.34 | 0.32 | 6.85 | 6.91 |
| 39 | 7.96 | 6.09 | 2.34  | 6.86  | 7.6  | 7.17 | 1.34 | 6.09 | 5.58 |
| 40 | 7.36 | 5.74 | 4.8   | 6.71  | 7.16 | 7.33 | 1.1  | 5.68 | 5.96 |
| 41 | 7.78 | 5.59 | 4.01  | 6.8   | 7.2  | 7.31 | 2.31 | 5.63 | 5.17 |
| 42 | 5.73 | 4.41 | 5.22  | 5.41  | 8.75 | 7.22 | 2.41 | 5.73 | 8.32 |
| 43 | 9.13 | 6.38 | 3.64  | 7.36  | 7.97 | 8.43 | 3.06 | 6.99 | 6.7  |
| 44 | 9.11 | 6.99 | 2.33  | 7.67  | 8.28 | 8.75 | 1.33 | 7.1  | 6.38 |
| 45 | 8.99 | 6.22 | 5.95  | 9.04  | 7.53 | 7.61 | 1.87 | 6.48 | 6    |
| 46 | 8.82 | 6.5  | 4.07  | 8.1   | 7.86 | 8.27 | 0    | 6.64 | 6.45 |
| 47 | 8.61 | 6.04 | 6.39  | 7.94  | 7.58 | 7.58 | 3.62 | 6.43 | 7.34 |
| 48 | 8.42 | 6.02 | 5.25  | 7.84  | 8.18 | 8.3  | 1.88 | 6.52 | 6.91 |
| 49 | 8.33 | 6.35 | 1.71  | 7.59  | 8.21 | 8.21 | 1.71 | 5.84 | 6.32 |
| 50 | 8.69 | 6.58 | 5.29  | 7.57  | 8.73 | 8.72 | 1.48 | 6.84 | 7.53 |
| 51 | 8.04 | 5.93 | 5.5   | 7.74  | 6.99 | 6.22 | 6.08 | 5.12 | 7.15 |
| 52 | 7.66 | 6.19 | 7.15  | 8.27  | 7.26 | 4.87 | 7.77 | 5.39 | 7.14 |
| 53 | 7.68 | 6.08 | 7.25  | 8.34  | 7.15 | 5.94 | 6.32 | 6.3  | 7.32 |

1  
2  
3  
4  
5  
6  
7  
8  
9  
10  
11  
12  
13  
14  
15  
16  
17  
18  
19  
20  
21  
22  
23  
24  
25  
26  
27  
28  
29  
30  
31  
32  
33  
34  
35  
36  
37  
38  
39  
40  
41  
42  
43  
44  
45  
46  
47  
48  
49  
50  
51  
52  
53  
54  
55  
56  
57  
58  
59  
60

|       |      |       |      |      |      |      |      |      |
|-------|------|-------|------|------|------|------|------|------|
| 7.96  | 5.88 | 6     | 7.74 | 6.97 | 5.94 | 4.97 | 5.88 | 7.39 |
| 9     | 6.13 | 7.87  | 9.18 | 7.6  | 6.54 | 2.84 | 6.73 | 7.67 |
| 8.46  | 6.59 | 8.4   | 9.46 | 7.87 | 7.01 | 2.24 | 6.73 | 7.66 |
| 7.83  | 6.2  | 7.26  | 9.45 | 7.67 | 6.99 | 3.33 | 6.55 | 7.74 |
| 7.83  | 6.61 | 7.54  | 9.48 | 7.5  | 6.96 | 1.95 | 5.95 | 7.74 |
| 9.43  | 7.09 | 7.3   | 8.94 | 8.29 | 7.03 | 1.35 | 6.84 | 7.97 |
| 9.02  | 6.82 | 8.46  | 9.66 | 7.81 | 4.65 | 4.01 | 6.89 | 8.25 |
| 8.63  | 6.9  | 7.41  | 9.72 | 7.66 | 4.68 | 5.19 | 6.52 | 8.02 |
| 9.49  | 6.79 | 9.4   | 8.85 | 7.89 | 4.83 | 2.33 | 7.06 | 8.78 |
| 9.63  | 6.87 | 9.07  | 9.78 | 8.31 | 5.67 | 3.09 | 7.1  | 8.84 |
| 9.35  | 7.14 | 8.86  | 9.17 | 8.13 | 5.78 | 3.97 | 7.01 | 8.49 |
| 9.32  | 7.19 | 9.36  | 9.13 | 8.34 | 5.38 | 1.97 | 6.63 | 8.37 |
| 9.3   | 6.87 | 8.79  | 9.36 | 8.13 | 5.46 | 2.65 | 6.99 | 8.59 |
| 8.35  | 6.27 | 7.05  | 8.37 | 7.36 | 6.16 | 3.87 | 5.99 | 6.9  |
| 8.69  | 6.73 | 8.02  | 9.25 | 7.74 | 1.51 | 7.22 | 6.02 | 6.84 |
| 8.44  | 6.25 | 9.18  | 7.83 | 7.74 | 6.17 | 3.73 | 6.34 | 7.55 |
| 9.12  | 6.71 | 8.35  | 8.5  | 6.65 | 1.58 | 4.39 | 6.85 | 7.96 |
| 7.79  | 6.8  | 8.89  | 9.63 | 7.04 | 1.67 | 6.75 | 6.13 | 7.54 |
| 8.15  | 6.71 | 9.22  | 9.18 | 7.07 | 0.52 | 3.98 | 6.84 | 8.1  |
| 9.03  | 6.25 | 7.4   | 8.91 | 7.27 | 1.93 | 2.74 | 5.74 | 7.66 |
| 8.07  | 6.75 | 9.09  | 10   | 7.87 | 4.3  | 9    | 5.3  | 7.72 |
| 8.36  | 6.21 | 7.71  | 9.8  | 7.67 | 4.69 | 8.84 | 4.94 | 8.06 |
| 8.97  | 6.53 | 7.46  | 7.72 | 8.15 | 6.19 | 2.11 | 6.66 | 7.61 |
| 9.23  | 6.36 | 7.7   | 7.74 | 8.33 | 5.93 | 3.25 | 5.45 | 7.77 |
| 10.98 | 6.85 | 9.45  | 7.32 | 8.19 | 5.96 | 4.15 | 6.85 | 9.47 |
| 8.71  | 5.89 | 6.06  | 7.45 | 5.61 | 0.36 | 3.53 | 4.17 | 7.55 |
| 8.25  | 5.7  | 6.79  | 7.38 | 6.52 | 4.88 | 6.22 | 4.88 | 7.52 |
| 8.27  | 5.16 | 7.39  | 8.16 | 6.41 | 3.09 | 7.3  | 4.46 | 7.7  |
| 8.97  | 6.81 | 8.15  | 5.71 | 7.94 | 1.9  | 5.9  | 4.71 | 7.78 |
| 7.46  | 5.85 | 1.76  | 6.71 | 7.12 | 7.01 | 1.76 | 6.01 | 6.22 |
| 7.65  | 5.47 | 6.39  | 7.04 | 6.95 | 7.09 | 2.3  | 5.58 | 6.18 |
| 7.51  | 5.53 | 0.88  | 6.34 | 7.24 | 7.72 | 0.88 | 5.93 | 5.74 |
| 7.33  | 5.81 | 3.76  | 6.51 | 7.45 | 7.46 | 3.28 | 4.96 | 6.28 |
| 7.72  | 5.45 | 5.53  | 7.29 | 6.46 | 5.79 | 1.68 | 5.36 | 5.96 |
| 7.94  | 5.52 | 5.47  | 7.19 | 6.96 | 6.57 | 0.66 | 5.68 | 6.73 |
| 7.8   | 5.32 | 6.66  | 6.93 | 6.79 | 6.34 | 1.35 | 5.57 | 6.56 |
| 8.48  | 5.52 | 7.49  | 6.92 | 6.89 | 6.09 | 0.75 | 5.43 | 6.44 |
| 9.7   | 7.71 | 5.31  | 7.73 | 6.44 | 0.35 | 3.81 | 5.64 | 7.88 |
| 8.47  | 5.63 | 7.94  | 8.29 | 7.59 | 6.16 | 4.63 | 5.92 | 8.36 |
| 8.42  | 6.89 | 8.09  | 9.52 | 6.53 | 0.42 | 3.23 | 5.94 | 7.54 |
| 9.3   | 6.48 | 9.78  | 9.48 | 5.69 | 2.23 | 2.23 | 6.4  | 8.09 |
| 8.93  | 6.14 | 6.64  | 8.76 | 6.48 | 6.26 | 3.76 | 5.52 | 7.08 |
| 9.21  | 6.51 | 10.29 | 9.1  | 7.68 | 4.51 | 4.51 | 6.51 | 7.83 |
| 7.87  | 6.23 | 8.45  | 9.22 | 6.97 | 0.87 | 5.42 | 5.73 | 7.05 |
| 7.95  | 6.14 | 9.2   | 8.7  | 7.46 | 0    | 0.94 | 5.58 | 7.31 |
| 9.37  | 5.44 | 8.08  | 7.31 | 6.24 | 2.68 | 5.93 | 4.68 | 5.85 |
| 9.18  | 5.96 | 8.18  | 7.87 | 6.92 | 5.92 | 5.19 | 5.57 | 6.92 |
| 8.62  | 5.7  | 8.37  | 7.91 | 6.78 | 3.74 | 4.52 | 5.6  | 6.34 |
| 8.94  | 5.72 | 7.77  | 7.62 | 7.2  | 6.34 | 3.43 | 5.84 | 6.39 |
| 7.94  | 6.14 | 7.78  | 8.36 | 6.83 | 1.16 | 2.16 | 4.93 | 7.35 |
| 6.83  | 5.99 | 7.02  | 7.16 | 6.78 | 5.99 | 2.11 | 5.05 | 6.72 |
| 7.33  | 5.64 | 6.69  | 6.87 | 6.4  | 6    | 0    | 5.36 | 6.48 |

<https://mc.manuscriptcentral.com/gut>

1  
2  
3  
4  
5  
6  
7  
8  
9  
10  
11  
12  
13  
14  
15  
16  
17  
18  
19  
20  
21  
22  
23  
24  
25  
26  
27  
28  
29  
30  
31  
32  
33  
34  
35  
36  
37  
38  
39  
40  
41  
42  
43  
44  
45  
46  
47  
48  
49  
50  
51  
52  
53  
54  
55  
56  
57  
58  
59  
60

|      |      |      |      |      |      |      |      |      |
|------|------|------|------|------|------|------|------|------|
| 6.88 | 5.65 | 7.86 | 7.37 | 7.11 | 2.37 | 2.79 | 5.6  | 7.46 |
| 7.14 | 5.1  | 7.79 | 7.29 | 5.96 | 6.19 | 2.1  | 5.62 | 7.49 |
| 6.74 | 4.91 | 7.52 | 7.56 | 6.59 | 6.29 | 0.59 | 4.83 | 8.16 |
| 6.9  | 5.01 | 7.41 | 7.89 | 6.44 | 5.95 | 2.49 | 4.81 | 8.51 |
| 8.18 | 5.64 | 7.2  | 6.41 | 6.91 | 8.27 | 1.55 | 6.2  | 7.39 |
| 8.45 | 5.87 | 7.48 | 8.83 | 6.53 | 1.89 | 8.67 | 5.42 | 7.57 |
| 7.49 | 5.73 | 6.46 | 9.07 | 6.53 | 3.07 | 9.42 | 4.15 | 7.15 |
| 7.22 | 5.62 | 6.24 | 9.09 | 6.85 | 1.67 | 9.25 | 4.56 | 7.25 |
| 8.23 | 6.11 | 0.27 | 6.84 | 7.61 | 7.8  | 2.27 | 6.66 | 6.03 |
| 8.08 | 6.15 | 6.65 | 6.7  | 6.81 | 7.04 | 1.77 | 6    | 6.66 |
| 8.87 | 6.76 | 7.86 | 8.03 | 6.1  | 1.24 | 2.46 | 5.18 | 7.37 |
| 7.72 | 6.32 | 6.5  | 8.1  | 7.06 | 5.75 | 0.89 | 6.32 | 6.67 |
| 8.31 | 6.21 | 7.07 | 8.11 | 6.92 | 2.3  | 5.06 | 5.69 | 7.15 |
| 8.56 | 6.13 | 8.41 | 7.59 | 7.19 | 5.55 | 0.13 | 6.08 | 6.91 |
| 8.65 | 4.13 | 9.75 | 8.81 | 4.13 | 3.54 | 2.54 | 5.35 | 7.35 |
| 8.55 | 5.8  | 7.42 | 9.04 | 6.56 | 4.44 | 2.12 | 4.5  | 6.78 |
| 7.92 | 5.95 | 6.45 | 8.52 | 6.93 | 5.76 | 2.04 | 4.91 | 6.39 |
| 8.72 | 5.51 | 7.42 | 9.11 | 6.32 | 3.56 | 0.75 | 4.45 | 6.7  |

1  
2  
3  
4  
5  
6  
7  
8  
9  
10  
11  
12  
13  
14  
15  
16  
17  
18  
19  
20  
21  
22  
23  
24  
25  
26  
27  
28  
29  
30  
31  
32  
33  
34  
35  
36  
37  
38  
39  
40  
41  
42  
43  
44  
45  
46  
47  
48  
49  
50  
51  
52  
53  
54  
55  
56  
57  
58  
59  
60

| NOX5 | NPR1 | NR3C1 | NR4A1 | NR4A3 | NRCAM | NRP1  | NRP2 | NRXN1 |
|------|------|-------|-------|-------|-------|-------|------|-------|
| 5.69 | 6.58 | 8.61  | 7.75  | 7.27  | 5.79  | 8.96  | 6.16 | 6.54  |
| 5.16 | 6.67 | 8.04  | 8.57  | 7.96  | 6.48  | 9.74  | 7.77 | 5.67  |
| 5.17 | 6.68 | 8.21  | 7.68  | 7.41  | 5.99  | 9.42  | 7.53 | 5.94  |
| 3.18 | 7.29 | 8.68  | 9.44  | 7.43  | 6.09  | 10.55 | 8.95 | 4.27  |
| 7.35 | 7.82 | 8.97  | 8.32  | 9.37  | 7.5   | 8.74  | 1.01 | 8.29  |
| 5.32 | 6.16 | 8.36  | 9.28  | 7.59  | 6.66  | 9.08  | 8.16 | 6.13  |
| 5.59 | 6.05 | 8.59  | 9.57  | 8.14  | 7.07  | 9.32  | 7.89 | 5.87  |
| 3.39 | 6.5  | 9.04  | 10.37 | 7.43  | 6.18  | 10.52 | 9.27 | 2.39  |
| 1.37 | 5.32 | 9     | 7.12  | 6.2   | 2.95  | 9.81  | 8.83 | 2.69  |
| 4.55 | 5.34 | 7.58  | 7.83  | 6.65  | 4.66  | 8.56  | 7.28 | 5.64  |
| 0.38 | 5.13 | 8.15  | 8.08  | 6.61  | 3.7   | 8.86  | 7.74 | 3.84  |
| 3    | 6.07 | 8.4   | 8.58  | 6.95  | 3.27  | 9.81  | 8.81 | 4.59  |
| 5.04 | 5.84 | 8.03  | 7.8   | 7.23  | 5.31  | 8.93  | 6.86 | 5.78  |
| 5.53 | 6.51 | 8.52  | 7.99  | 7.34  | 6.8   | 9.74  | 8.3  | 6.07  |
| 1.77 | 7.44 | 9.28  | 9.63  | 7.32  | 1.77  | 11.58 | 9.36 | 3.35  |
| 6.07 | 6.64 | 8.99  | 9.92  | 8.81  | 6.03  | 9.45  | 7.98 | 6.56  |
| 5.68 | 6.1  | 8.76  | 9.58  | 7.87  | 6.15  | 8.82  | 8.21 | 6.68  |
| 6.05 | 6.91 | 8.7   | 9.27  | 8.05  | 6.38  | 9.67  | 8.85 | 6.93  |
| 2.48 | 7.14 | 10.06 | 9.76  | 7.15  | 2.48  | 10.75 | 8.32 | 3.8   |
| 0.89 | 5.63 | 9.16  | 8.59  | 6.72  | 3.31  | 9.73  | 8.37 | 4.26  |
| 2.5  | 6.71 | 9.7   | 9.15  | 7.65  | 3.31  | 10.3  | 9.11 | 4.5   |
| 2.96 | 5.93 | 8.59  | 8.11  | 6.4   | 6.32  | 9.64  | 9.1  | 3.73  |
| 2.2  | 5.66 | 8.81  | 9.07  | 6.84  | 6.61  | 9.55  | 8.18 | 3.37  |
| 1.48 | 5.59 | 8.81  | 9.69  | 7.92  | 6.06  | 9.7   | 9.23 | 4.42  |
| 2.43 | 3.75 | 7.58  | 7.53  | 6.87  | 6.38  | 8.94  | 7.78 | 2.01  |
| 1.71 | 4.13 | 7.86  | 9.13  | 6.86  | 4.71  | 8.19  | 7.13 | 1.71  |
| 2.11 | 4.98 | 8.05  | 8.09  | 5.88  | 5.16  | 8.47  | 6.91 | 3.98  |
| 5.24 | 6    | 8.33  | 9.53  | 7.92  | 5.64  | 8.62  | 6.54 | 5.72  |
| 5.19 | 6.45 | 7.79  | 8.11  | 7.3   | 6.3   | 8.33  | 6.72 | 5.65  |
| 5.44 | 6.37 | 8.16  | 7.94  | 7.22  | 5.79  | 9.16  | 7.64 | 6.3   |
| 5.28 | 6.28 | 7.73  | 7.54  | 6.87  | 6.2   | 8.61  | 7.88 | 5.78  |
| 6.03 | 6.97 | 8.44  | 8.39  | 7.7   | 6.26  | 9.5   | 7.26 | 6.59  |
| 5.67 | 6.28 | 9.4   | 9.6   | 8.55  | 6.47  | 8.69  | 8.03 | 7.08  |
| 1.64 | 5.58 | 8.91  | 8.34  | 6.06  | 5.67  | 10.36 | 9.35 | 2.64  |
| 2.61 | 5.59 | 8.52  | 8.97  | 6.77  | 4.78  | 9.6   | 8.4  | 2.93  |
| 0.47 | 6.45 | 8.88  | 9.19  | 6.25  | 4.86  | 10.3  | 9.08 | 3.28  |
| 1.45 | 5.57 | 8.86  | 8.75  | 8.05  | 2.77  | 8.7   | 7.71 | 2.77  |
| 2.86 | 3.99 | 8.72  | 6.31  | 6.33  | 3.1   | 8.88  | 7.74 | 3.73  |
| 2.69 | 5.37 | 8.92  | 7.55  | 6.37  | 3.83  | 9.33  | 7.83 | 3.54  |
| 2.55 | 4.14 | 8.82  | 6.99  | 5.77  | 2.55  | 9.08  | 7.71 | 4.2   |
| 4.94 | 5.83 | 8.1   | 8.4   | 7.25  | 5.99  | 8.75  | 7.01 | 6.29  |
| 5.45 | 5.8  | 7.7   | 8.94  | 7.5   | 5.98  | 8.42  | 7.06 | 6.48  |
| 5.12 | 5.86 | 7.78  | 8.35  | 7.25  | 6.58  | 7.97  | 6.56 | 6.39  |
| 4.4  | 5.54 | 7.44  | 8.82  | 7.15  | 6.21  | 7.76  | 7.01 | 5.27  |
| 2.86 | 8.25 | 8.67  | 9.01  | 6.03  | 4.45  | 10.78 | 7.11 | 2.86  |
| 3.31 | 5.12 | 7.92  | 7.7   | 6.12  | 3.64  | 8.61  | 6.65 | 4.22  |
| 2    | 5.81 | 8.09  | 8.47  | 6.21  | 3.91  | 9.19  | 7.53 | 2.81  |
| 2.13 | 5.71 | 8.52  | 8.73  | 6.81  | 4.76  | 9.63  | 8.41 | 3.9   |
| 2.96 | 5.72 | 9.26  | 9.54  | 7.87  | 7.08  | 10.16 | 8.88 | 3.63  |
| 2.01 | 5.26 | 8.8   | 8.49  | 6.64  | 8.06  | 9.72  | 8.86 | 2.59  |
| 0.5  | 5.35 | 8.93  | 8.71  | 6.72  | 8.67  | 9.3   | 8.1  | 3.82  |

<https://mc.manuscriptcentral.com/gut>



1  
2  
3  
4  
5  
6  
7  
8  
9  
10  
11  
12  
13  
14  
15  
16  
17  
18  
19  
20  
21  
22  
23  
24  
25  
26  
27  
28  
29  
30  
31  
32  
33  
34  
35  
36  
37  
38  
39  
40  
41  
42  
43  
44  
45  
46  
47  
48  
49  
50  
51  
52  
53  
54  
55  
56  
57  
58  
59  
60

|      |      |      |       |       |      |       |      |      |
|------|------|------|-------|-------|------|-------|------|------|
| 1.08 | 5.17 | 9.07 | 9.43  | 8.23  | 8.15 | 9.75  | 9.13 | 3.89 |
| 5.42 | 6.94 | 7.36 | 9.04  | 7.13  | 7.37 | 9.19  | 7.05 | 6.46 |
| 5.47 | 6.56 | 7.57 | 9.51  | 7.53  | 7.68 | 9.98  | 7.83 | 6.49 |
| 5.2  | 6.6  | 7.45 | 8.32  | 7.17  | 8.69 | 9.57  | 7.64 | 5.79 |
| 4.55 | 6.74 | 7.92 | 8.8   | 7.4   | 7.74 | 9.8   | 8.07 | 6.23 |
| 4.14 | 6.11 | 8.89 | 8.07  | 6.3   | 4.93 | 9.76  | 7.41 | 4.75 |
| 3.83 | 6    | 8.69 | 8.35  | 6.44  | 8.49 | 10.03 | 8.32 | 3.42 |
| 4.67 | 4.43 | 7.76 | 7.36  | 5.56  | 7.34 | 9.24  | 6.58 | 2.7  |
| 5.02 | 6.48 | 8.69 | 8.1   | 6.37  | 9.21 | 9.55  | 8.95 | 3.44 |
| 2.39 | 4.9  | 7.55 | 7.57  | 5.51  | 4.83 | 9.25  | 7.05 | 4.94 |
| 2.86 | 4.63 | 8.44 | 7.56  | 6.27  | 4.35 | 9.34  | 7.4  | 5.13 |
| 1.4  | 3.82 | 7.32 | 7.95  | 5.37  | 5.43 | 9.29  | 7.12 | 5.49 |
| 1.56 | 5.4  | 7.86 | 7.5   | 6.21  | 3.15 | 9.36  | 8.26 | 4.73 |
| 6.15 | 7.15 | 8.47 | 8.74  | 13.49 | 5.15 | 9.74  | 8.32 | 7.15 |
| 5.79 | 6.92 | 8.96 | 9.29  | 9.88  | 7.16 | 10.25 | 7.96 | 7.37 |
| 6.15 | 6.72 | 8.9  | 9.1   | 8.32  | 6.82 | 9.44  | 7.62 | 7.32 |
| 8.15 | 8.31 | 9.23 | 9.56  | 10.95 | 8.69 | 9.57  | 2.24 | 9.53 |
| 7.79 | 8.12 | 8.79 | 9.23  | 10.86 | 8.41 | 9.69  | 2.36 | 8.92 |
| 5.27 | 5.72 | 7.97 | 8.75  | 7.05  | 6.48 | 9.12  | 6.05 | 6.05 |
| 5.26 | 5.41 | 8.05 | 9.81  | 7.29  | 6.76 | 9.07  | 5.45 | 5.78 |
| 4.99 | 6.16 | 8.4  | 9.25  | 7.55  | 6.44 | 9.23  | 6.45 | 6.12 |
| 0.1  | 6.31 | 8.41 | 10.28 | 8.31  | 3.85 | 9.76  | 8.24 | 3.18 |
| 3.86 | 6.21 | 8.17 | 9.6   | 7.59  | 4.45 | 9.64  | 8.28 | 5.03 |
| 5.05 | 7.33 | 8.63 | 9.03  | 8     | 6.51 | 9.48  | 8.09 | 6.75 |
| 2.64 | 5.64 | 9.38 | 9.14  | 7.91  | 6.57 | 9.74  | 8.27 | 5.03 |
| 2.63 | 5.4  | 8.87 | 10.2  | 8.44  | 7.05 | 10.05 | 8.98 | 4.43 |
| 3.01 | 5.33 | 8.86 | 9.52  | 7.67  | 7.88 | 10.36 | 9.42 | 4.28 |
| 5.17 | 5.53 | 8.41 | 9.02  | 7.24  | 6.03 | 8.93  | 7.62 | 6.06 |
| 4.3  | 6.05 | 8.2  | 9.31  | 7.48  | 5.65 | 9.31  | 7.96 | 6.02 |
| 5.4  | 6.15 | 8.53 | 8.55  | 7.48  | 5.93 | 9.07  | 7.78 | 6.38 |
| 5.58 | 6.96 | 8.61 | 10.86 | 9.2   | 7.89 | 10.36 | 7.45 | 7.01 |
| 5.66 | 6.69 | 8.04 | 7.49  | 6.97  | 7.5  | 9.19  | 7.29 | 6.77 |
| 5.8  | 6.89 | 8.05 | 8.96  | 7.63  | 7.51 | 9.35  | 7.11 | 6.8  |
| 5.37 | 6.39 | 8.79 | 8.35  | 7.11  | 5.98 | 9.38  | 8.49 | 6.64 |
| 5.16 | 6.58 | 8.79 | 8.4   | 7.23  | 6.3  | 9.25  | 7.98 | 6.62 |
| 5.57 | 6.58 | 9.14 | 9.25  | 7.74  | 6.03 | 9.74  | 9.02 | 6.64 |
| 5.86 | 6.79 | 9.09 | 8.65  | 7.68  | 6.02 | 9.33  | 7.56 | 6.86 |
| 5.86 | 6.79 | 9.09 | 8.65  | 7.68  | 6.02 | 9.33  | 7.56 | 6.86 |
| 5.76 | 6.61 | 8.77 | 9.79  | 7.58  | 6.75 | 9.06  | 8.86 | 7.04 |
| 5.85 | 6.98 | 8.9  | 9.97  | 8.19  | 6.53 | 9.27  | 9.27 | 6.93 |
| 5.82 | 6.87 | 8.9  | 9.28  | 7.8   | 6.71 | 9.42  | 9.27 | 6.99 |
| 6.41 | 6.88 | 9.25 | 8.51  | 8.14  | 7.26 | 8.83  | 7.01 | 7.23 |
| 5.85 | 6.47 | 8.8  | 8.57  | 7.53  | 6.64 | 9.23  | 7.79 | 6.58 |
| 5.7  | 5.95 | 8.72 | 8.48  | 7.09  | 6.55 | 9.03  | 7.37 | 6.47 |
| 6.04 | 7.18 | 8.86 | 8.09  | 8.12  | 6.9  | 9.38  | 8.21 | 7.15 |
| 1.73 | 4.63 | 8.21 | 10.04 | 6.53  | 6.14 | 9.53  | 8.46 | 1.73 |
| 2.66 | 4.93 | 7.17 | 9.85  | 5.98  | 6.38 | 8.56  | 7.32 | 1.66 |
| 1.52 | 6.52 | 8.77 | 9.32  | 5.87  | 6.3  | 10.03 | 8.6  | 3.32 |
| 6.06 | 6.78 | 8.98 | 8.55  | 7.97  | 6.69 | 8.88  | 7.1  | 6.86 |
| 6.04 | 6.76 | 8.85 | 9.06  | 7.74  | 6.46 | 9.72  | 8.73 | 7.03 |
| 5.85 | 6.52 | 8.75 | 7.66  | 7.28  | 6.74 | 9.48  | 9.32 | 7.01 |
| 5.48 | 6.07 | 8.59 | 8.4   | 7.69  | 6.86 | 8.56  | 7.1  | 6.95 |

<https://mc.manuscriptcentral.com/gut>

1  
2  
3  
4  
5  
6  
7  
8  
9  
10  
11  
12  
13  
14  
15  
16  
17  
18  
19  
20  
21  
22  
23  
24  
25  
26  
27  
28  
29  
30  
31  
32  
33  
34  
35  
36  
37  
38  
39  
40  
41  
42  
43  
44  
45  
46  
47  
48  
49  
50  
51  
52  
53  
54  
55  
56  
57  
58  
59  
60

|      |       |      |       |       |      |       |      |      |
|------|-------|------|-------|-------|------|-------|------|------|
| 5.7  | 6.15  | 8.47 | 7.96  | 7.38  | 6.55 | 8.75  | 7.61 | 6.31 |
| 6.14 | 7.07  | 8.9  | 8.77  | 8.87  | 7.87 | 9.31  | 7.84 | 7.77 |
| 4.15 | 5.99  | 9    | 10.55 | 7.98  | 5.42 | 9.38  | 7.86 | 5.8  |
| 3.78 | 5.57  | 8.89 | 10.03 | 7.57  | 5.6  | 9.96  | 8.75 | 5.47 |
| 3.08 | 6.49  | 8.84 | 9.57  | 7.13  | 4.81 | 10.31 | 9.72 | 5.4  |
| 3.41 | 6.26  | 9.42 | 9.54  | 7.6   | 4.21 | 10.49 | 8.27 | 2.99 |
| 2.36 | 4.41  | 7.58 | 7.6   | 6.13  | 3.87 | 9.12  | 7.98 | 0.55 |
| 3.22 | 4.97  | 7.63 | 8.23  | 5.91  | 4.28 | 9.38  | 8.34 | 2.76 |
| 3.49 | 8.4   | 9.39 | 9.38  | 6.89  | 4.08 | 12.07 | 9.54 | 4.49 |
| 1.79 | 6     | 9.03 | 9.68  | 7.39  | 6.28 | 9.8   | 8.28 | 3.38 |
| 2.49 | 5.7   | 8.11 | 9.38  | 6.7   | 6.01 | 8.97  | 7.63 | 3.49 |
| 5.1  | 5.87  | 8    | 8.5   | 7.46  | 6.85 | 8.26  | 6.55 | 6.25 |
| 3.26 | 8.45  | 9.03 | 10    | 6.43  | 6.07 | 11.49 | 9.29 | 3.85 |
| 7.63 | 8.71  | 8.57 | 9.04  | 9.54  | 7.42 | 10.32 | 2.2  | 8.85 |
| 4.12 | 5.23  | 6.37 | 8.28  | 5.75  | 4.53 | 8.97  | 8.79 | 3.53 |
| 2.16 | 4.08  | 6.49 | 8.52  | 5.88  | 4.08 | 8.59  | 8.66 | 2.16 |
| 3.22 | 4.27  | 6.5  | 8.4   | 6.39  | 3.69 | 8.96  | 8.69 | 3.98 |
| 2.24 | 3.89  | 9.5  | 8.38  | 7.51  | 3.96 | 9.49  | 8.03 | 2.6  |
| 5.03 | 5.19  | 8.85 | 7.87  | 7.1   | 5.93 | 9.31  | 7.64 | 6.38 |
| 3.79 | 4.79  | 9.23 | 8.39  | 7.6   | 5.25 | 9.86  | 8.33 | 5.8  |
| 6.16 | 10.02 | 9.81 | 9.25  | 9.49  | 7.49 | 12.41 | 7.75 | 5.16 |
| 3.22 | 4.66  | 8.31 | 7.73  | 7.13  | 5.79 | 7.93  | 7.06 | 3.3  |
| 0.54 | 6.03  | 8.75 | 7.3   | 6.73  | 6.39 | 8.66  | 7.93 | 4.44 |
| 1.18 | 6.5   | 8.71 | 7.35  | 4.77  | 2.18 | 10.28 | 8.68 | 1.18 |
| 2.49 | 7.69  | 8.98 | 7.84  | 4.23  | 3.49 | 11.07 | 9.06 | 1.91 |
| 2.54 | 7.3   | 9.1  | 8.82  | 7.11  | 4    | 10.77 | 8.96 | 3.35 |
| 6.8  | 7.52  | 8.63 | 8.57  | 8.19  | 6.8  | 9.05  | 5    | 7.54 |
| 7.01 | 7.52  | 8.72 | 8.6   | 8.39  | 7.3  | 8.67  | 2.86 | 8    |
| 6.9  | 7.19  | 8.73 | 7.96  | 8.11  | 6.77 | 8.28  | 2.77 | 7.67 |
| 0.01 | 5.14  | 8.3  | 9.67  | 7.47  | 4.47 | 9.45  | 7.39 | 2.01 |
| 0    | 5.59  | 8.37 | 9.04  | 6.47  | 4.55 | 9     | 9.4  | 4.45 |
| 2.69 | 5.39  | 7.92 | 9.33  | 6.9   | 3.43 | 9.26  | 8.35 | 4.02 |
| 2.48 | 6.73  | 8.75 | 11.51 | 9.52  | 3.74 | 10.1  | 8.63 | 3.48 |
| 6.31 | 6.93  | 7.88 | 7.96  | 8.13  | 6.45 | 8.91  | 4.04 | 7.25 |
| 5.84 | 6.21  | 7.62 | 7.05  | 7.25  | 6.42 | 7.9   | 2.57 | 6.88 |
| 5.88 | 5.96  | 7.76 | 7.34  | 7.29  | 5.99 | 7.84  | 4.47 | 6.61 |
| 6.93 | 6.63  | 7.9  | 7.88  | 9.09  | 7.36 | 8.11  | 0.32 | 7.92 |
| 6.09 | 6.38  | 8.05 | 7.73  | 7.44  | 6.98 | 7.87  | 3.66 | 6.95 |
| 5.49 | 6.31  | 7.94 | 7.35  | 7     | 6.05 | 7.81  | 2.68 | 6.96 |
| 5.56 | 6.31  | 7.94 | 7.44  | 7.4   | 6.56 | 8.15  | 4.31 | 6.94 |
| 5.41 | 4.73  | 5.41 | 7.11  | 11.49 | 7.77 | 7.27  | 3.41 | 6.87 |
| 7.1  | 7.55  | 8.82 | 8.72  | 8.47  | 7.56 | 8.8   | 4.51 | 7.93 |
| 7.17 | 7.64  | 9.22 | 8.82  | 8.83  | 7.48 | 8.82  | 0    | 8.22 |
| 6.22 | 6.22  | 8.22 | 8.57  | 7.99  | 6.39 | 9.33  | 5.91 | 6.95 |
| 6.93 | 7.09  | 8.79 | 8.57  | 8.49  | 6.91 | 8.92  | 4.33 | 7.56 |
| 6.44 | 6.99  | 8.41 | 8.59  | 7.9   | 6.44 | 9.13  | 6.73 | 7.28 |
| 6.83 | 7.48  | 8.7  | 8.6   | 8.44  | 6.65 | 8.88  | 5.79 | 7.95 |
| 6.61 | 7.84  | 8.8  | 8.22  | 8.53  | 6.94 | 8.48  | 1.71 | 7.89 |
| 7.02 | 7.62  | 8.51 | 8.6   | 9.31  | 7.87 | 9.07  | 4.8  | 8.34 |
| 4.3  | 5.87  | 7.89 | 7.28  | 7.39  | 6.48 | 8.58  | 6.81 | 5.91 |
| 4.14 | 5.87  | 7.72 | 7.35  | 7.46  | 6.22 | 8.82  | 7.04 | 6.14 |
| 4.62 | 5.87  | 7.88 | 7.97  | 7.52  | 6.27 | 8.88  | 7.15 | 5.68 |

<https://mc.manuscriptcentral.com/gut>

|    |      |      |       |       |      |      |       |       |      |
|----|------|------|-------|-------|------|------|-------|-------|------|
| 1  |      |      |       |       |      |      |       |       |      |
| 2  | 4.66 | 6.34 | 7.98  | 7.91  | 7.95 | 6.79 | 8.79  | 6.73  | 6.1  |
| 3  | 5.56 | 6.52 | 8.95  | 10.28 | 9.21 | 5.1  | 9.61  | 8.53  | 5.64 |
| 4  | 5.61 | 7.07 | 8.75  | 11.09 | 8.97 | 5.61 | 9.66  | 8.28  | 6.24 |
| 5  | 5.83 | 6.67 | 8.64  | 10.16 | 8.57 | 5.74 | 9.02  | 7.56  | 6.06 |
| 6  | 5.62 | 6.88 | 8.66  | 10.13 | 8.34 | 5.72 | 8.93  | 7.4   | 6.32 |
| 7  | 6.07 | 6.84 | 9.39  | 9.77  | 8.83 | 6.52 | 9.72  | 7.76  | 7.09 |
| 8  | 3.84 | 6.62 | 9.18  | 9.25  | 7.4  | 7.15 | 10.35 | 8.33  | 5.23 |
| 9  | 3.98 | 6.52 | 9.02  | 9.19  | 7.15 | 7.44 | 9.81  | 7.9   | 4.84 |
| 10 | 4.06 | 7.64 | 10.02 | 9.96  | 8.04 | 7.01 | 11.13 | 10.19 | 6.13 |
| 11 | 3.76 | 6.19 | 8.42  | 9.07  | 7.56 | 5.46 | 10.65 | 8.91  | 4.85 |
| 12 | 4.34 | 6.52 | 8.46  | 9.09  | 7.42 | 5.59 | 10.24 | 9.12  | 5.78 |
| 13 | 4.09 | 6.24 | 8.69  | 9.07  | 7.45 | 5.63 | 10.29 | 9.32  | 5.34 |
| 14 | 4.06 | 6.82 | 8.11  | 8.78  | 7.04 | 4.52 | 10.3  | 9.45  | 4.97 |
| 15 | 4.9  | 5.48 | 8.39  | 7.44  | 6.48 | 6.82 | 9.48  | 7.02  | 5.23 |
| 16 | 1.83 | 4.72 | 8.41  | 7.6   | 6.09 | 7.45 | 9.74  | 7.61  | 2.68 |
| 17 | 4.95 | 7.23 | 9.31  | 8.64  | 7.6  | 6.43 | 10.89 | 9.52  | 6.47 |
| 18 | 3.17 | 5.97 | 9.34  | 9.78  | 6.87 | 4.52 | 10.25 | 8.52  | 2.8  |
| 19 | 0.67 | 4.91 | 7.84  | 8.35  | 5.42 | 4.13 | 9.56  | 8.48  | 2.99 |
| 20 | 1.52 | 5.91 | 8.87  | 8.57  | 6.4  | 5.16 | 10.09 | 9.92  | 5.38 |
| 21 | 0.93 | 5.25 | 8.23  | 8.82  | 7.32 | 4.32 | 9.33  | 7.37  | 3.39 |
| 22 | 2.13 | 4.45 | 7.63  | 9.49  | 7.87 | 4.97 | 8.88  | 8.47  | 2.35 |
| 23 | 0.48 | 3.73 | 6.78  | 8.64  | 6.34 | 5.5  | 8.43  | 6.99  | 2.29 |
| 24 | 5.28 | 6.57 | 8.64  | 10.76 | 8.86 | 4.43 | 9.45  | 7.89  | 6.19 |
| 25 | 5.25 | 6.25 | 8.77  | 10.96 | 8.62 | 5.25 | 9.26  | 7.82  | 5.88 |
| 26 | 4.74 | 8.54 | 9.67  | 13.06 | 9.96 | 4.15 | 11.91 | 10.01 | 5.47 |
| 27 | 1.36 | 5.06 | 8.66  | 7.43  | 6.43 | 3.53 | 8.33  | 7.29  | 1.36 |
| 28 | 3.6  | 4.88 | 8.11  | 8.74  | 7.49 | 5.04 | 8.41  | 7.22  | 5.84 |
| 29 | 2.35 | 4.22 | 7.72  | 6.75  | 6.46 | 3.93 | 8.18  | 6.84  | 4.57 |
| 30 | 1.9  | 5.36 | 8.94  | 9     | 7.81 | 3.48 | 9.04  | 9.45  | 4.9  |
| 31 | 7.18 | 6.46 | 7.97  | 7.57  | 7.28 | 5.85 | 7.62  | 1.76  | 6.93 |
| 32 | 7.33 | 6.5  | 7.99  | 7.56  | 6.99 | 6.24 | 8.06  | 5.42  | 6.47 |
| 33 | 7.74 | 6.59 | 8.26  | 7.93  | 7.36 | 6.53 | 7.09  | 1.88  | 6.91 |
| 34 | 7.42 | 6.57 | 8.01  | 7.38  | 7.38 | 6.38 | 7.31  | 3.76  | 6.91 |
| 35 | 4.72 | 5.31 | 7.34  | 8.52  | 6.56 | 4.31 | 7.89  | 5.59  | 5.24 |
| 36 | 5.44 | 6.12 | 7.72  | 7.1   | 6.64 | 5.33 | 8.11  | 5.61  | 5.93 |
| 37 | 4.98 | 5.83 | 7.84  | 7.18  | 6.26 | 5.52 | 8.36  | 6.54  | 6.03 |
| 38 | 4.84 | 5.78 | 7.83  | 7.84  | 7    | 4.59 | 8.65  | 7.13  | 5.87 |
| 39 | 0.35 | 5.44 | 9.85  | 8.64  | 7.17 | 4.26 | 8.55  | 7.3   | 3.68 |
| 40 | 3.78 | 6.05 | 8.51  | 9.44  | 7.32 | 3.05 | 8.38  | 8.06  | 5.16 |
| 41 | 0.42 | 4.59 | 9.04  | 8.22  | 6.55 | 3.42 | 9.62  | 7.9   | 1.42 |
| 42 | 2.23 | 7.48 | 10.1  | 9.47  | 6.32 | 3.23 | 11.54 | 8.79  | 4.55 |
| 43 | 4.52 | 6.77 | 8.46  | 8.23  | 7.22 | 5.41 | 9.28  | 6.84  | 5.67 |
| 44 | 5.51 | 7.68 | 10.1  | 9.42  | 7.1  | 5.51 | 11.6  | 8.97  | 4.51 |
| 45 | 0.87 | 5.36 | 8.27  | 7.68  | 5.23 | 5.19 | 9.52  | 8.27  | 3.68 |
| 46 | 0.94 | 4.64 | 8.62  | 8.55  | 7.02 | 7.71 | 9.63  | 9.12  | 4.33 |
| 47 | 0.68 | 3.85 | 7.58  | 5.77  | 3.49 | 7.77 | 7.42  | 7.3   | 0.68 |
| 48 | 4.23 | 5.51 | 8.23  | 8.77  | 7.66 | 6.01 | 9.05  | 8.13  | 5.07 |
| 49 | 2.28 | 4.86 | 7.76  | 8.36  | 6.58 | 7.07 | 8.57  | 7.94  | 3.74 |
| 50 | 4.58 | 6.41 | 7.96  | 8.71  | 7.22 | 6.68 | 8.94  | 8.04  | 6.28 |
| 51 | 0.57 | 5.3  | 8.1   | 9.81  | 7.65 | 3.82 | 9.59  | 7.32  | 1.57 |
| 52 | 4.62 | 5.11 | 7.68  | 6.74  | 6.26 | 4.99 | 8.69  | 7.35  | 5.66 |
| 53 | 4.88 | 5.33 | 7.65  | 7.38  | 7.31 | 5.16 | 8.83  | 6.96  | 5.67 |

|      |      |      |       |      |      |       |      |      |
|------|------|------|-------|------|------|-------|------|------|
| 0.79 | 6.04 | 8.05 | 8.1   | 6.6  | 2.79 | 9.74  | 9.13 | 4.25 |
| 4.42 | 6.39 | 7.23 | 8.38  | 7.64 | 5.68 | 9.75  | 6.85 | 5.1  |
| 3.91 | 5.23 | 6.69 | 6.8   | 6.11 | 3.17 | 8.23  | 6.69 | 5.29 |
| 4.29 | 4.95 | 6.57 | 6.01  | 5.24 | 3.95 | 8.03  | 6.39 | 4.39 |
| 6.46 | 7.05 | 7.72 | 8.81  | 7.51 | 5.95 | 9.58  | 6.6  | 7.39 |
| 1.15 | 4.21 | 7.82 | 8.98  | 7.55 | 5.24 | 8.5   | 7.31 | 2.89 |
| 0.65 | 3.71 | 6.57 | 6.04  | 5.67 | 5.9  | 8.13  | 5.91 | 2.65 |
| 0    | 3.35 | 6.04 | 5.84  | 5.97 | 6.31 | 8.16  | 5.91 | 2.16 |
| 6.56 | 7.11 | 8.21 | 7.81  | 7.92 | 6.94 | 7.98  | 1.27 | 7.78 |
| 5.73 | 6.27 | 8.23 | 8.34  | 7.46 | 6.28 | 8.53  | 6.54 | 6.49 |
| 0.65 | 5.05 | 8.74 | 5.82  | 6.34 | 3.9  | 9.81  | 6.9  | 2.65 |
| 4.98 | 5.89 | 8.47 | 6.67  | 5.84 | 4.59 | 8.89  | 7.93 | 5.21 |
| 3.3  | 5.62 | 8.73 | 6.32  | 6    | 3.47 | 9.42  | 8.14 | 3.76 |
| 4.21 | 5.68 | 8.78 | 6.55  | 6.35 | 5.03 | 10.14 | 7.55 | 5.41 |
| 2.54 | 8.43 | 8.81 | 12.05 | 9.78 | 2.54 | 11.91 | 8.54 | 4.13 |
| 3.71 | 5.16 | 8.34 | 6.78  | 7.03 | 7.92 | 8.43  | 7.37 | 4.8  |
| 4.85 | 5.36 | 7.99 | 7.38  | 6.96 | 7.46 | 8     | 6.29 | 5.56 |
| 2.75 | 5.15 | 8.39 | 6.56  | 6.82 | 7.64 | 8.72  | 7.52 | 3.56 |

1  
2  
3  
4  
5  
6  
7  
8  
9  
10  
11  
12  
13  
14  
15  
16  
17  
18  
19  
20  
21  
22  
23  
24  
25  
26  
27  
28  
29  
30  
31  
32  
33  
34  
35  
36  
37  
38  
39  
40  
41  
42  
43  
44  
45  
46  
47  
48  
49  
50  
51  
52  
53  
54  
55  
56  
57  
58  
59  
60

| NRXN3 | NTRK1 | OAS1  | OCLN | OGN   | OLFML2B | OVOL2 | P3H1 | P3H2 |
|-------|-------|-------|------|-------|---------|-------|------|------|
| 5.34  | 6.94  | 9.22  | 7.4  | 7.54  | 7.79    | 7.96  | 6.38 | 3.95 |
| 5.42  | 6.77  | 9.56  | 6.9  | 7.01  | 6.72    | 7.87  | 6.31 | 5.16 |
| 5.29  | 6.93  | 9.59  | 6.73 | 7.15  | 6.4     | 7.86  | 6.19 | 5.37 |
| 5.61  | 4.43  | 9.56  | 6.81 | 9.41  | 7.27    | 8.32  | 7.05 | 4.64 |
| 6.89  | 8.31  | 8.17  | 7.47 | 8.42  | 7.42    | 8.72  | 3.33 | 1.01 |
| 6.3   | 6.56  | 9.83  | 6.6  | 6.64  | 6.99    | 8.71  | 6.42 | 5.47 |
| 5.87  | 6.41  | 9.81  | 6.8  | 6.22  | 7.18    | 8.98  | 6.47 | 5.62 |
| 5.35  | 4.56  | 10.67 | 6.33 | 6.2   | 7.86    | 9.98  | 6.35 | 5.95 |
| 5.17  | 4.07  | 8.89  | 6.01 | 4.89  | 8.2     | 9.71  | 7.51 | 4.54 |
| 5.55  | 6.69  | 9     | 7.24 | 6.4   | 7.06    | 8.73  | 6.75 | 5.79 |
| 4.77  | 4.19  | 9.24  | 7.57 | 6.57  | 6.74    | 9     | 7.4  | 6.55 |
| 5.81  | 4     | 9.33  | 7.19 | 7.65  | 7.64    | 8.63  | 7.62 | 5.68 |
| 5.77  | 6.52  | 10.16 | 8.3  | 7.93  | 7.04    | 9.3   | 5.93 | 4.09 |
| 6.32  | 6.74  | 9.09  | 7.64 | 8.09  | 7.77    | 8.97  | 7.35 | 4    |
| 5.67  | 5.94  | 9.61  | 7.02 | 9.84  | 9.04    | 10.16 | 6.52 | 5.23 |
| 5.9   | 6.94  | 8.95  | 6.53 | 6.8   | 7.47    | 8.17  | 7.09 | 5.03 |
| 6.15  | 7.31  | 9.19  | 7.52 | 7.36  | 7.57    | 8.94  | 7.29 | 4.1  |
| 6.87  | 7.68  | 8.96  | 7.05 | 7.98  | 7.57    | 8.84  | 7.25 | 4.08 |
| 3.22  | 4.98  | 9.6   | 6.24 | 7.22  | 8.34    | 9.89  | 6.98 | 5.29 |
| 4.92  | 4.17  | 9.39  | 7.57 | 6.47  | 7.02    | 9.27  | 7.21 | 6.35 |
| 6.94  | 4.63  | 9.45  | 6.48 | 8.57  | 7.61    | 8.76  | 7.24 | 6.89 |
| 6.47  | 4.15  | 10.72 | 7.34 | 9.76  | 6.17    | 8.63  | 7.91 | 7.01 |
| 5.72  | 3.78  | 10.7  | 7.67 | 9.79  | 6.35    | 8.82  | 7.71 | 7.21 |
| 6.3   | 4.06  | 10.69 | 7.23 | 10.42 | 6.76    | 8.78  | 7.78 | 7.22 |
| 8.29  | 4.23  | 7.23  | 7.86 | 6.71  | 5.18    | 7.55  | 7.48 | 4.13 |
| 1.13  | 2.71  | 10.86 | 7.69 | 5.08  | 4.99    | 8.78  | 6.22 | 7.3  |
| 2.84  | 4.11  | 11.07 | 7.5  | 5.43  | 4.98    | 8.86  | 6.9  | 7.04 |
| 4.62  | 6.45  | 9.62  | 7.93 | 7.02  | 6.02    | 8.81  | 6.32 | 5.82 |
| 5.16  | 6.9   | 10.5  | 6.56 | 6.78  | 6.8     | 8.61  | 5.53 | 2.5  |
| 5.44  | 6.93  | 9.5   | 7.14 | 8.06  | 6.54    | 8.57  | 5.68 | 5.02 |
| 5.15  | 6.81  | 10.69 | 6.72 | 6.95  | 6.37    | 8.66  | 5.52 | 4.52 |
| 5.92  | 7.18  | 10.52 | 7.05 | 8.15  | 7.44    | 8.89  | 5.71 | 2.71 |
| 6.22  | 7.18  | 8.03  | 5.5  | 6.88  | 6.37    | 7.17  | 6.9  | 3.81 |
| 6.01  | 4.15  | 8.19  | 7.42 | 8.97  | 8.32    | 8.16  | 7.9  | 5.38 |
| 4.66  | 3.86  | 8.15  | 7.97 | 6.31  | 6.76    | 8.64  | 7.41 | 5.17 |
| 5.72  | 4.38  | 8.02  | 7.59 | 9.21  | 7.85    | 8.75  | 7.6  | 4.99 |
| 4.03  | 3.62  | 10.13 | 5.65 | 3.03  | 6.38    | 7.1   | 5.8  | 3.77 |
| 2.57  | 3.99  | 10.06 | 5.51 | 6.08  | 5.94    | 7.85  | 6.45 | 6.77 |
| 2.69  | 5.01  | 9.97  | 4.27 | 8.25  | 6.58    | 6.43  | 6.94 | 3.54 |
| 3.65  | 4.74  | 9.96  | 5.67 | 8.03  | 6.27    | 6.51  | 6.8  | 5.47 |
| 5.18  | 6.6   | 9.16  | 6.36 | 6.78  | 6.9     | 8.55  | 5.94 | 4.8  |
| 5.65  | 6.58  | 8.61  | 6.47 | 7.18  | 6.16    | 8.93  | 5.8  | 4.54 |
| 5.97  | 5.86  | 8.44  | 6.24 | 6.8   | 5.77    | 8.91  | 5.61 | 4.86 |
| 5.02  | 5.9   | 9.08  | 6.46 | 6.41  | 6.12    | 9.52  | 5.96 | 5.06 |
| 3.86  | 4.86  | 9.01  | 5.86 | 6.56  | 8.15    | 7.32  | 5.18 | 4.45 |
| 4.64  | 4.4   | 8.01  | 7.31 | 8.32  | 5.64    | 8.69  | 6.12 | 5.4  |
| 4.81  | 3.58  | 8.16  | 7.02 | 9.04  | 6.87    | 8.35  | 6.96 | 5.28 |
| 6.33  | 2.81  | 7.92  | 6.55 | 10.13 | 7.45    | 7.95  | 7.23 | 5.02 |
| 4.09  | 3.8   | 11.2  | 7.88 | 7.58  | 8.24    | 7.8   | 7.39 | 5.22 |
| 3.92  | 3.47  | 11.12 | 8    | 6.8   | 7.54    | 7.1   | 7.77 | 5.33 |
| 4.3   | 3.5   | 10.51 | 8.46 | 6.95  | 5.99    | 7.63  | 7.2  | 5.3  |

<https://mc.manuscriptcentral.com/gut>

## Gut

1  
2  
3  
4  
5  
6  
7  
8  
9  
10  
11  
12  
13  
14  
15  
16  
17  
18  
19  
20  
21  
22  
23  
24  
25  
26  
27  
28  
29  
30  
31  
32  
33  
34  
35  
36  
37  
38  
39  
40  
41  
42  
43  
44  
45  
46  
47  
48  
49  
50  
51  
52  
53  
54  
55  
56  
57  
58  
59  
60

|      |       |       |      |      |      |       |      |      |
|------|-------|-------|------|------|------|-------|------|------|
| 5.33 | 4.47  | 10.75 | 7.92 | 8.19 | 7.37 | 6.81  | 7.9  | 5.08 |
| 6.96 | 7.51  | 11.56 | 7.7  | 7.43 | 7.79 | 9.86  | 6.42 | 3.62 |
| 7.99 | 7.1   | 11.1  | 7.28 | 7.7  | 7.07 | 9.49  | 6.86 | 4.71 |
| 7.82 | 7.15  | 10.66 | 7.41 | 6.86 | 6.63 | 9.49  | 6.74 | 4.41 |
| 8.15 | 7.22  | 11.05 | 7.15 | 8.03 | 7.46 | 9.35  | 6.48 | 4.87 |
| 4.4  | 5.18  | 9.6   | 7.72 | 6.75 | 6.93 | 9.51  | 6.96 | 4.55 |
| 4.42 | 4.57  | 10.14 | 8.36 | 7.15 | 6.48 | 9.61  | 6.99 | 4.89 |
| 2.17 | 3.39  | 9.54  | 8.75 | 4.67 | 6.07 | 9.94  | 6.48 | 4    |
| 5.86 | 3.25  | 10.44 | 8.03 | 8.15 | 6.96 | 10.3  | 7.43 | 4.61 |
| 3.83 | 2.39  | 9.62  | 7.83 | 6.34 | 7    | 7.93  | 6.83 | 3.75 |
| 4.79 | 3.71  | 9.31  | 7.55 | 6.47 | 6.19 | 7.89  | 6.83 | 6.42 |
| 3.9  | 3.99  | 8.76  | 7.75 | 4.77 | 6.19 | 7.43  | 6.87 | 5.17 |
| 5.19 | 1.98  | 8.68  | 7.69 | 7.66 | 6.21 | 6.9   | 7.1  | 4.98 |
| 6.74 | 8.74  | 8.85  | 6.74 | 7.15 | 9.79 | 10.74 | 6.15 | 5.15 |
| 7.68 | 8.69  | 9.73  | 6.4  | 6.6  | 7.91 | 10.21 | 5.54 | 2.79 |
| 6.52 | 7.79  | 9.48  | 7.26 | 6.85 | 6.91 | 9.39  | 5.38 | 2.45 |
| 8.84 | 10.15 | 9.79  | 7.52 | 8.87 | 8.86 | 9.94  | 1.24 | 0.24 |
| 8.52 | 9.97  | 9.03  | 6.56 | 8.95 | 8.38 | 10.02 | 3.36 | 1.77 |
| 4.78 | 6.16  | 9.32  | 7.78 | 6.69 | 6.12 | 8.89  | 5.69 | 4.05 |
| 5.07 | 6.19  | 9.95  | 8.35 | 6.59 | 6.24 | 9.1   | 5.09 | 3.96 |
| 5.48 | 6.69  | 9.48  | 7.72 | 7.12 | 6.34 | 9.22  | 5.69 | 3.37 |
| 4.62 | 3.85  | 9.71  | 9.09 | 9.27 | 7.73 | 8.88  | 7.03 | 4.52 |
| 5.03 | 5.56  | 9.56  | 8.95 | 8.97 | 7.36 | 8.58  | 6.82 | 4.6  |
| 6.44 | 7.12  | 7.93  | 8.52 | 9.6  | 8.71 | 8.94  | 6.22 | 4.75 |
| 4.34 | 4.96  | 10.46 | 8.28 | 5.16 | 6.64 | 9.35  | 7.47 | 8.09 |
| 5.68 | 5.53  | 10.34 | 7.85 | 4.8  | 7.06 | 9.39  | 7.87 | 7.1  |
| 6.24 | 4.01  | 9.94  | 7.7  | 6.62 | 7.55 | 9.26  | 8.1  | 6.52 |
| 7.24 | 6.22  | 9.45  | 8.23 | 6.7  | 6.83 | 8.01  | 7.35 | 5.17 |
| 7.48 | 6.55  | 9.85  | 8.29 | 6.65 | 7.1  | 7.78  | 7.47 | 4.84 |
| 7.52 | 6.66  | 9.74  | 8.28 | 7.36 | 7    | 7.89  | 7.34 | 2.74 |
| 8.1  | 7.4   | 10.22 | 7.78 | 8.9  | 7.97 | 9.46  | 6.72 | 3.58 |
| 7.75 | 7.46  | 10.09 | 7.86 | 7.75 | 7.06 | 9.47  | 6.75 | 3.2  |
| 7.48 | 7.64  | 10.13 | 8.19 | 7.58 | 7.1  | 9.86  | 6.1  | 3.31 |
| 6.02 | 6.7   | 9.34  | 6.94 | 8.07 | 6.89 | 8.19  | 7.2  | 4.68 |
| 5.61 | 6.88  | 9.71  | 7.48 | 7.55 | 6.49 | 8.4   | 7.07 | 5.24 |
| 6.3  | 6.98  | 9.5   | 7.09 | 8.46 | 7.35 | 8.29  | 7.54 | 5.31 |
| 6.27 | 7.49  | 8.56  | 6.72 | 7.89 | 7.83 | 8.04  | 6.79 | 3.9  |
| 6.27 | 7.49  | 8.56  | 6.72 | 7.89 | 7.83 | 8.04  | 6.79 | 3.9  |
| 6.67 | 7.1   | 9.29  | 7.43 | 8.36 | 6.61 | 8.63  | 6.43 | 3.85 |
| 7.24 | 7.05  | 9.06  | 7.13 | 9.64 | 6.86 | 8.35  | 6.31 | 5.04 |
| 6.56 | 7.22  | 8.9   | 7.19 | 9.18 | 7.74 | 8.41  | 7.29 | 4.82 |
| 6.96 | 6.96  | 8.66  | 6.66 | 7.74 | 7.27 | 7.73  | 5.64 | 4.73 |
| 6.87 | 6.97  | 9.79  | 8    | 7.98 | 7.32 | 8.57  | 7.11 | 5.88 |
| 6.04 | 6.74  | 10.02 | 8.23 | 7.45 | 7.12 | 8.56  | 6.7  | 5.73 |
| 7.17 | 7.12  | 9.54  | 7.66 | 8.65 | 7.82 | 8.46  | 6.28 | 5    |
| 5.08 | 3.53  | 8.4   | 8.27 | 8.27 | 6.83 | 8.1   | 7.13 | 3.53 |
| 1.66 | 3.08  | 8.45  | 8.29 | 6.62 | 5.93 | 8.83  | 6.32 | 3.08 |
| 3.84 | 4.32  | 8.61  | 7.88 | 8.22 | 7.76 | 8.48  | 7.19 | 3.32 |
| 6.32 | 7.06  | 9     | 6.72 | 7.7  | 7.35 | 7.99  | 6.18 | 3.61 |
| 6.7  | 7.33  | 8.92  | 7.26 | 9.63 | 7.82 | 8.25  | 7.08 | 5.14 |
| 6.72 | 6.72  | 9.14  | 7.48 | 9.64 | 7.45 | 7.96  | 6.65 | 5.1  |
| 6.55 | 6.42  | 8.79  | 7.07 | 7.57 | 7.15 | 8.43  | 6.4  | 3.86 |

<https://mc.manuscriptcentral.com/gut>

|    |      |      |       |      |       |      |       |      |      |
|----|------|------|-------|------|-------|------|-------|------|------|
| 1  |      |      |       |      |       |      |       |      |      |
| 2  | 6.44 | 6.15 | 8.55  | 7.59 | 7.2   | 7.18 | 8.2   | 6.68 | 4.75 |
| 3  | 7.42 | 7.45 | 8.62  | 7.39 | 8.38  | 8.05 | 8.85  | 5.39 | 3.24 |
| 4  | 5.15 | 6.75 | 7.91  | 6.65 | 6.5   | 7.55 | 8.86  | 6.98 | 4.33 |
| 5  | 6.49 | 6.21 | 8.81  | 6.62 | 7.38  | 7.18 | 8.58  | 7.49 | 6.47 |
| 6  | 7.28 | 5.85 | 8.72  | 6.3  | 9.26  | 7.71 | 8.61  | 8.16 | 5.92 |
| 7  | 2.73 | 4.93 | 10.91 | 6.71 | 7.4   | 8.35 | 8.11  | 6.64 | 4.8  |
| 8  | 3.36 | 6.97 | 9.2   | 8.24 | 6.15  | 7.03 | 7.97  | 7.63 | 5.43 |
| 9  | 3.84 | 6.78 | 9.95  | 8.25 | 6.61  | 7.04 | 7.55  | 7.89 | 4.61 |
| 10 | 2.49 | 9.71 | 9.67  | 7.2  | 9.57  | 8.45 | 8.64  | 6.66 | 4.82 |
| 11 | 3.11 | 3.38 | 9.26  | 6.15 | 5.6   | 8.32 | 8.89  | 6.86 | 5.65 |
| 12 | 4.08 | 3.49 | 9.91  | 6.49 | 5.58  | 6.64 | 9.21  | 6.58 | 5.44 |
| 13 | 5.21 | 6.4  | 9.27  | 6.56 | 6.74  | 6.49 | 8.64  | 6.08 | 4.59 |
| 14 | 2.26 | 6.07 | 10.21 | 5.96 | 7.78  | 9.68 | 10.71 | 6.65 | 5.07 |
| 15 | 7.16 | 9.49 | 8.82  | 7.45 | 9.15  | 8.21 | 9.46  | 2.2  | 0.2  |
| 16 | 3.41 | 4.53 | 10.44 | 6.73 | 6.41  | 7.03 | 9.1   | 6.55 | 7.52 |
| 17 | 3.16 | 1.83 | 10.5  | 7.03 | 5.29  | 6.58 | 8.98  | 6.48 | 6.51 |
| 18 | 4.47 | 4.73 | 10.45 | 7.02 | 7.07  | 7.02 | 9.14  | 6.44 | 6.72 |
| 19 | 4.79 | 3.14 | 11.1  | 8.16 | 4.39  | 6.57 | 8.89  | 7.16 | 5.29 |
| 20 | 5.96 | 6.72 | 10.17 | 7.46 | 5.82  | 6.52 | 8.84  | 6.58 | 3.09 |
| 21 | 5.4  | 6.33 | 10.45 | 7.62 | 6.1   | 6.91 | 8.88  | 6.74 | 3.4  |
| 22 | 6.16 | 9.16 | 7.75  | 6.16 | 6.75  | 8.97 | 9.41  | 7.16 | 5.16 |
| 23 | 3.53 | 3.78 | 8.56  | 7.59 | 4.04  | 5.3  | 6.91  | 6.96 | 4.42 |
| 24 | 3.54 | 3.99 | 9.77  | 7.37 | 5.89  | 5.66 | 7.61  | 6.91 | 4.54 |
| 25 | 5.99 | 4.5  | 9.25  | 6.93 | 7.95  | 7.11 | 8.85  | 6.47 | 4.5  |
| 26 | 5.76 | 5.55 | 9.12  | 6.37 | 9.22  | 8.43 | 8.78  | 6.79 | 5.08 |
| 27 | 5.24 | 4.35 | 9.69  | 6.65 | 9.7   | 9.33 | 7.52  | 7.84 | 5.75 |
| 28 | 7.08 | 8.5  | 8.07  | 6.93 | 8.11  | 7.26 | 8.99  | 4.46 | 3.32 |
| 29 | 6.99 | 8.81 | 8.16  | 7.38 | 8.08  | 7.28 | 8.58  | 3.67 | 2.44 |
| 30 | 6.35 | 7.83 | 8.11  | 6.98 | 8.02  | 6.57 | 8.07  | 3.77 | 1.77 |
| 31 | 3.71 | 2.82 | 8.22  | 6.62 | 7.34  | 8.51 | 7.19  | 6.74 | 4.82 |
| 32 | 6.68 | 2.4  | 7.68  | 5.32 | 9.72  | 7.39 | 6.68  | 7.07 | 4.91 |
| 33 | 5.69 | 3.69 | 8.47  | 6.17 | 9.23  | 6.78 | 7.75  | 6.43 | 5.15 |
| 34 | 4.33 | 2.74 | 7.82  | 5.51 | 10.09 | 8.82 | 5.96  | 7.22 | 5.16 |
| 35 | 6.74 | 7.41 | 7.82  | 5.62 | 7.87  | 6.77 | 8.06  | 2.04 | 1.45 |
| 36 | 5.98 | 6.98 | 7.4   | 6.03 | 7.31  | 6.16 | 8.16  | 2.57 | 0.25 |
| 37 | 5.51 | 6.93 | 7.54  | 5.9  | 7.04  | 5.9  | 8.47  | 2.34 | 2.67 |
| 38 | 7.42 | 8.24 | 7.86  | 5.91 | 7.47  | 6.92 | 8.95  | 0    | 0    |
| 39 | 6.76 | 7.27 | 7.29  | 5.73 | 7.38  | 6.38 | 7.54  | 3.92 | 2.34 |
| 40 | 6.42 | 7.03 | 7.16  | 6.27 | 7.6   | 5.96 | 7.25  | 4.42 | 2.1  |
| 41 | 6.52 | 6.89 | 7.3   | 6.09 | 7.79  | 6.17 | 7.35  | 4.01 | 2.89 |
| 42 | 9.08 | 8.32 | 8.41  | 4    | 7.32  | 8.19 | 8.29  | 4    | 2.41 |
| 43 | 7.46 | 8.34 | 8.5   | 7.38 | 8.27  | 7.46 | 8.93  | 2.06 | 2.06 |
| 44 | 7.38 | 8.58 | 8.54  | 7.8  | 8.61  | 7.35 | 9.21  | 2.13 | 1.33 |
| 45 | 6.15 | 7.42 | 9.16  | 7.79 | 7.41  | 7.17 | 9.77  | 2.87 | 6.75 |
| 46 | 7.31 | 7.89 | 8.27  | 7.43 | 8.1   | 7.26 | 9.23  | 0.75 | 3.45 |
| 47 | 6.77 | 7.66 | 8.2   | 6.68 | 7.53  | 7.51 | 8.35  | 4.94 | 4.97 |
| 48 | 6.58 | 8.54 | 8.34  | 6.89 | 8.49  | 7.59 | 8.71  | 3.1  | 1.88 |
| 49 | 6.66 | 8.19 | 8.25  | 7.21 | 8.47  | 7.6  | 8.21  | 3.88 | 1.71 |
| 50 | 8.12 | 8.81 | 8.5   | 7.65 | 8.29  | 7.79 | 8.74  | 2.48 | 1.48 |
| 51 | 6.12 | 5.84 | 9.49  | 7.84 | 7.22  | 6.84 | 6.94  | 5.2  | 2.72 |
| 52 | 5.99 | 5.81 | 9.51  | 7.93 | 7.42  | 7.28 | 6.97  | 6.05 | 3.65 |
| 53 | 6.36 | 6.67 | 9.87  | 8.01 | 7.65  | 7.05 | 7.33  | 6.21 | 2.62 |

1  
2  
3  
4  
5  
6  
7  
8  
9  
10  
11  
12  
13  
14  
15  
16  
17  
18  
19  
20  
21  
22  
23  
24  
25  
26  
27  
28  
29  
30  
31  
32  
33  
34  
35  
36  
37  
38  
39  
40  
41  
42  
43  
44  
45  
46  
47  
48  
49  
50  
51  
52  
53  
54  
55  
56  
57  
58  
59  
60

|      |      |       |      |       |      |       |      |      |
|------|------|-------|------|-------|------|-------|------|------|
| 6.25 | 6.85 | 9.89  | 7.93 | 7.68  | 7.04 | 7.68  | 5.59 | 1.27 |
| 5.64 | 7.1  | 11.96 | 7.09 | 7.53  | 7.67 | 9.93  | 7.28 | 3.98 |
| 6.03 | 7.03 | 11.49 | 7.3  | 7.81  | 7.78 | 9.92  | 7.57 | 5.51 |
| 5.39 | 7.41 | 12.43 | 7.1  | 7.12  | 7.37 | 9.92  | 7.23 | 3.74 |
| 4.93 | 7.19 | 12.07 | 7.21 | 6.58  | 7.15 | 9.89  | 6.85 | 3.48 |
| 6.21 | 7.3  | 10.48 | 6.94 | 7.69  | 8    | 8.57  | 6.91 | 5.72 |
| 4.84 | 6.4  | 11.58 | 7.5  | 9.84  | 7.05 | 9.08  | 7.71 | 5.09 |
| 4.44 | 5.19 | 11.1  | 7.92 | 9.03  | 6.23 | 8.93  | 8.25 | 4.62 |
| 8.36 | 7.33 | 10.62 | 5.99 | 11.56 | 7.64 | 8.95  | 7.55 | 5.87 |
| 5.41 | 6.57 | 9.7   | 7.94 | 5.72  | 8.35 | 8.62  | 7.61 | 7.38 |
| 6.02 | 6.67 | 9.54  | 7.71 | 7.8   | 8.08 | 9.07  | 7.63 | 8.16 |
| 5.84 | 6.38 | 9.58  | 7.83 | 7.55  | 8.66 | 8.98  | 7.89 | 7.92 |
| 6.06 | 6.4  | 9.37  | 8.17 | 8.02  | 7.69 | 9.13  | 7.21 | 8.47 |
| 4.94 | 6.21 | 9.34  | 7.3  | 6.16  | 7.87 | 7.94  | 6.16 | 3.73 |
| 3.32 | 4.09 | 9.95  | 7.81 | 7.43  | 6.65 | 8.25  | 7.09 | 5.09 |
| 7.34 | 6.41 | 8.7   | 6.41 | 10.27 | 8.65 | 8.3   | 6.7  | 5.27 |
| 4.64 | 3.8  | 9.69  | 5.95 | 8.37  | 8.57 | 6.89  | 7.53 | 6.12 |
| 4.37 | 3.47 | 9.32  | 7.16 | 8.78  | 6.6  | 9.04  | 7.21 | 5.25 |
| 6.56 | 3.84 | 9.78  | 5.98 | 9.78  | 7.27 | 7.66  | 7.68 | 6.16 |
| 4.63 | 3.39 | 9.81  | 7.74 | 7.73  | 7.08 | 9.36  | 6.76 | 4.32 |
| 6.75 | 3.71 | 10.38 | 7.83 | 5.45  | 7.07 | 7.83  | 7.87 | 3.94 |
| 7.73 | 2.29 | 10.44 | 8.04 | 5.36  | 6.02 | 9.03  | 6.82 | 3.87 |
| 5.35 | 7.04 | 7.9   | 7.06 | 8.05  | 6.35 | 8.01  | 6.6  | 5.5  |
| 5.18 | 6.74 | 7.54  | 7.77 | 6.66  | 6.63 | 7.7   | 7.29 | 5.02 |
| 7.61 | 7.15 | 8.15  | 6.47 | 10.77 | 7.96 | 8.93  | 5.96 | 6.47 |
| 5.45 | 2.36 | 8.59  | 7.71 | 6.22  | 5.72 | 6.34  | 6.55 | 3.68 |
| 6.15 | 5.49 | 8.59  | 7.09 | 6.52  | 5.74 | 7.53  | 6.65 | 4.49 |
| 6.35 | 5.49 | 9.31  | 8.15 | 5.12  | 6.33 | 7.33  | 6.56 | 4.01 |
| 6.6  | 2.9  | 9.07  | 6.81 | 8.24  | 6.85 | 7.6   | 7.11 | 4.48 |
| 6.71 | 7.43 | 7.15  | 6.4  | 7.51  | 6.22 | 7.99  | 1.76 | 1.76 |
| 6.11 | 6.89 | 7.63  | 6.11 | 7.58  | 6.3  | 7.97  | 3.72 | 2.72 |
| 6.34 | 7.24 | 7.31  | 6.86 | 7.78  | 6.41 | 7.63  | 3.47 | 1.88 |
| 6.57 | 7.59 | 7.24  | 6.42 | 7.68  | 6.28 | 7.3   | 3.28 | 0.96 |
| 4.17 | 5.68 | 7.76  | 6.24 | 5.79  | 6.22 | 6.88  | 5    | 2.36 |
| 5.15 | 6.58 | 7.71  | 6.46 | 7.54  | 5.77 | 7.22  | 5.12 | 2.98 |
| 5.49 | 6.45 | 7.4   | 6.43 | 8.29  | 6.45 | 6.8   | 5.05 | 2.09 |
| 5.1  | 6.2  | 7.84  | 6.23 | 8.9   | 6.85 | 6.21  | 6.24 | 2.97 |
| 4.26 | 2.35 | 8.09  | 4.88 | 4.81  | 5.16 | 0.35  | 6.8  | 2.94 |
| 5.55 | 7.11 | 9.44  | 7.27 | 6.55  | 6.27 | 9.44  | 6.51 | 5.16 |
| 3.42 | 4.23 | 10.92 | 7.62 | 4.51  | 6.37 | 9.8   | 6.46 | 6.55 |
| 3.23 | 6.14 | 10.42 | 6.48 | 7.28  | 7.4  | 10.79 | 6.69 | 3.23 |
| 5.04 | 7.23 | 10.11 | 7.4  | 6.98  | 7    | 9.17  | 6.45 | 4.26 |
| 4.51 | 7.51 | 9.83  | 6.1  | 9.1   | 8.32 | 10    | 7.83 | 6.83 |
| 4.57 | 4.04 | 9.61  | 6.96 | 7.94  | 6.39 | 8.88  | 7.54 | 5.57 |
| 6.44 | 4.1  | 9.9   | 6.53 | 8.03  | 7.49 | 8.97  | 7.47 | 5.87 |
| 5.97 | 0.68 | 9.34  | 8.65 | 0.68  | 4.68 | 5.33  | 6.44 | 3.85 |
| 6.64 | 6.23 | 8.97  | 7.01 | 8.16  | 6.07 | 6.78  | 6.74 | 5.11 |
| 6.45 | 5.32 | 8.76  | 7.74 | 8.35  | 5.49 | 6.16  | 7.03 | 4.92 |
| 6.52 | 6.68 | 8.57  | 7.47 | 8.49  | 6.36 | 6.9   | 6.67 | 5.26 |
| 4.16 | 2.16 | 9.17  | 5.72 | 5.5   | 7.99 | 6.44  | 6.59 | 4.43 |
| 5.81 | 5.99 | 8.65  | 5.81 | 7.97  | 6.64 | 7.59  | 6.05 | 4.53 |
| 5.39 | 5.83 | 8.48  | 5.54 | 8.06  | 6.33 | 7.36  | 5.83 | 3.64 |

<https://mc.manuscriptcentral.com/gut>



1  
2  
3  
4  
5  
6  
7  
8  
9  
10  
11  
12  
13  
14  
15  
16  
17  
18  
19  
20  
21  
22  
23  
24  
25  
26  
27  
28  
29  
30  
31  
32  
33  
34  
35  
36  
37  
38  
39  
40  
41  
42  
43  
44  
45  
46  
47  
48  
49  
50  
51  
52  
53  
54  
55  
56  
57  
58  
59  
60

|      |      |      |      |       |      |       |      |      |
|------|------|------|------|-------|------|-------|------|------|
| 7.64 | 4.25 | 9.28 | 5.25 | 9.12  | 7.39 | 8.5   | 5.92 | 6.34 |
| 5.19 | 6.31 | 9.45 | 4.42 | 8.91  | 8.67 | 8.62  | 6.39 | 5.42 |
| 4.98 | 5.83 | 9.67 | 4.98 | 6.23  | 5.29 | 8.36  | 6.59 | 3.76 |
| 5.39 | 5.44 | 9.82 | 4.88 | 7.12  | 5.49 | 8.44  | 6.68 | 4.66 |
| 5.88 | 7.93 | 8    | 5.72 | 8.23  | 6.88 | 8.76  | 3.88 | 3.14 |
| 4.73 | 3.37 | 7.95 | 6.83 | 6.63  | 6.69 | 6.7   | 6.09 | 3.37 |
| 4.93 | 3.07 | 7.64 | 6.68 | 4.59  | 5.54 | 7.61  | 4.9  | 2.65 |
| 5.21 | 3.16 | 7.56 | 6.68 | 3.52  | 5    | 7.7   | 4.88 | 2.52 |
| 6.52 | 7.59 | 7.38 | 7.29 | 7.86  | 6.8  | 8.19  | 1.27 | 0.27 |
| 5.91 | 6.95 | 8.05 | 6.23 | 8.29  | 6.51 | 8     | 5.34 | 4.05 |
| 3.56 | 3.9  | 8.47 | 5.56 | 7.18  | 8.92 | 7.28  | 6.31 | 4.78 |
| 6.17 | 6.28 | 8.27 | 5.47 | 9.03  | 6.7  | 7.6   | 6.72 | 5.41 |
| 6    | 5.06 | 8.57 | 5.16 | 9.97  | 6.99 | 8.07  | 6.23 | 5.11 |
| 5.37 | 5.93 | 8.41 | 4.83 | 10.39 | 8.93 | 7.27  | 6.96 | 4.83 |
| 2.54 | 6.24 | 8.35 | 5.35 | 9.08  | 9.11 | 11.68 | 5.71 | 4.13 |
| 5.12 | 5.71 | 9.19 | 6.65 | 6.67  | 5.84 | 9.01  | 6.51 | 6.54 |
| 5.71 | 6.37 | 8.98 | 6.26 | 6.86  | 5.82 | 8.42  | 6.09 | 4.44 |
| 4.61 | 5.18 | 9.32 | 6.56 | 6.71  | 6.34 | 9.16  | 6.28 | 6.43 |

1  
2  
3  
4  
5  
6  
7  
8  
9  
10  
11  
12  
13  
14  
15  
16  
17  
18  
19  
20  
21  
22  
23  
24  
25  
26  
27  
28  
29  
30  
31  
32  
33  
34  
35  
36  
37  
38  
39  
40  
41  
42  
43  
44  
45  
46  
47  
48  
49  
50  
51  
52  
53  
54  
55  
56  
57  
58  
59  
60

| PCOLCE | PDCD10 | PDCL3 | PDGFA | PDGFC | PDGFRB | PDK1 | PDPN | PEBP4 |
|--------|--------|-------|-------|-------|--------|------|------|-------|
| 8.27   | 9.41   | 7.55  | 6     | 6.3   | 8.85   | 7.8  | 5.73 | 1.56  |
| 8      | 8.67   | 7.69  | 6.88  | 6.08  | 9.57   | 6.8  | 7.58 | 0     |
| 8.24   | 8.52   | 7.76  | 6.68  | 5.51  | 9      | 6.7  | 7.8  | 2.67  |
| 9.14   | 9.18   | 8.18  | 7.56  | 5.7   | 10.08  | 6.65 | 8.52 | 1.18  |
| 8.57   | 8.62   | 7.93  | 5.92  | 7.5   | 8.23   | 3.01 | 2.01 | 1.01  |
| 8.17   | 9.09   | 7.52  | 5.62  | 7     | 9.22   | 7.12 | 7.9  | 1.49  |
| 8.39   | 9.21   | 7.53  | 6.29  | 6.9   | 9.34   | 7.51 | 8.01 | 0.92  |
| 9.39   | 9.99   | 8.98  | 6.2   | 6.12  | 9.14   | 7.86 | 8.3  | 1.39  |
| 8.61   | 9.45   | 8.7   | 7.24  | 5.72  | 9.48   | 7.52 | 6.41 | 2.69  |
| 7.92   | 9.27   | 8.26  | 5.58  | 6.78  | 8.78   | 6.96 | 8.04 | 0     |
| 7.97   | 9.47   | 8.15  | 6.57  | 5.55  | 8.61   | 7.9  | 8.28 | 1.96  |
| 8.98   | 9.62   | 8.44  | 6.75  | 5.77  | 9.52   | 7.54 | 8.83 | 3     |
| 8.07   | 9.15   | 7.89  | 7.33  | 5.93  | 9      | 6.34 | 7.68 | 1.99  |
| 9.42   | 9.04   | 8.14  | 7.08  | 6.69  | 10.11  | 7.32 | 9    | 0.67  |
| 10.72  | 9.72   | 10.11 | 7.05  | 4.58  | 8.83   | 8.38 | 7.02 | 1.77  |
| 9.05   | 9.07   | 8.18  | 6.67  | 6.85  | 9.36   | 7.4  | 7.28 | 1.94  |
| 9.27   | 9.13   | 8.24  | 6.84  | 7.17  | 9.36   | 6.46 | 8.02 | 1.29  |
| 9.8    | 9.36   | 8.73  | 7.21  | 7.46  | 9.46   | 7.35 | 7.78 | 2.76  |
| 9.97   | 9.97   | 8.9   | 7.22  | 4.15  | 9.71   | 7.8  | 6.34 | 2.9   |
| 8.4    | 9.53   | 7.94  | 7.27  | 5.86  | 10.03  | 8.52 | 8.25 | 0.89  |
| 8.9    | 9.62   | 8.15  | 6.94  | 4.93  | 9.93   | 8.17 | 7.47 | 2.31  |
| 9.76   | 10.41  | 8.1   | 7.7   | 7.79  | 9.91   | 7.57 | 9.71 | 0.15  |
| 9.04   | 10.4   | 8.11  | 7.97  | 7.13  | 9.66   | 7.62 | 9.55 | 2.78  |
| 9.52   | 10.2   | 7.98  | 7.54  | 7.76  | 9.71   | 7.43 | 9.16 | 3.22  |
| 9.55   | 8.9    | 7.44  | 8.6   | 6.33  | 7.76   | 8.08 | 6.53 | 2.01  |
| 5.71   | 9.53   | 8.1   | 7.02  | 3.71  | 8.37   | 8.1  | 7.77 | 0.13  |
| 6.16   | 9.46   | 8.32  | 6.77  | 4.61  | 8.09   | 8.08 | 7.09 | 0.52  |
| 7.11   | 9.08   | 8.22  | 6.59  | 5.89  | 8.08   | 8.21 | 7.05 | 0     |
| 7.77   | 8.54   | 7.95  | 5.65  | 5.7   | 8.36   | 5.74 | 4.74 | 1.28  |
| 8.08   | 8.7    | 8.39  | 5.73  | 5.68  | 8.51   | 6.98 | 6.91 | 2.09  |
| 7.83   | 8.65   | 8.08  | 6.72  | 5.52  | 8.33   | 6.67 | 6.08 | 1.78  |
| 8.64   | 8.71   | 8.41  | 6.13  | 6.32  | 8.87   | 6.13 | 5.03 | 2.29  |
| 8.11   | 8.77   | 8.04  | 5.52  | 6.41  | 8.69   | 7.59 | 6.25 | 3.25  |
| 9.5    | 9.12   | 8.09  | 8.39  | 7.64  | 10.44  | 7.43 | 8.98 | 1.06  |
| 8.64   | 9.42   | 8.26  | 8.4   | 6.54  | 9.88   | 8.04 | 8.92 | 0     |
| 9.64   | 9.24   | 8.35  | 8.16  | 6.51  | 10.06  | 7.26 | 8.34 | 0.47  |
| 8.06   | 9.28   | 7.95  | 4.9   | 4.62  | 7.95   | 7.28 | 5.77 | 1.45  |
| 8.02   | 9.08   | 7.28  | 5.1   | 4.1   | 8.28   | 8.24 | 8.87 | 0     |
| 9.03   | 8.92   | 7.22  | 4.83  | 4.37  | 8.6    | 8.28 | 8.34 | 1.37  |
| 8.69   | 8.78   | 7.27  | 4.27  | 4.79  | 8.19   | 8.31 | 7.86 | 1.33  |
| 8.01   | 8.48   | 7.85  | 5.7   | 6.02  | 8.45   | 6.43 | 6.59 | 1.51  |
| 8.32   | 8.77   | 8.03  | 5.83  | 6.44  | 8.5    | 6.16 | 7.9  | 0     |
| 8.33   | 8.57   | 8.09  | 5.08  | 6.28  | 8.11   | 6    | 7.31 | 2.54  |
| 8.41   | 8.96   | 7.95  | 5.86  | 6.32  | 8.44   | 6.57 | 7.95 | 0     |
| 9.49   | 9.41   | 10.68 | 7.11  | 3.86  | 7.18   | 6.86 | 2.86 | 3.86  |
| 7.07   | 9.1    | 7.4   | 8.11  | 5.9   | 8.74   | 7.03 | 7.97 | 1.9   |
| 8.4    | 9.37   | 6.93  | 8.14  | 6.37  | 9.71   | 7    | 8.36 | 1.58  |
| 9.05   | 8.88   | 6.91  | 7.4   | 6.81  | 10.21  | 7.41 | 8.65 | 1.39  |
| 8.61   | 10.23  | 8.75  | 6.61  | 5.63  | 9.62   | 8.83 | 7.52 | 1.63  |
| 9.09   | 10.28  | 8.35  | 6.78  | 6.58  | 9.81   | 7.88 | 9.23 | 2.82  |
| 8.36   | 10.16  | 8.75  | 6.6   | 6.67  | 9.29   | 8.05 | 8.52 | 2.08  |

<https://mc.manuscriptcentral.com/gut>

|    |       |       |       |      |      |       |      |      |      |
|----|-------|-------|-------|------|------|-------|------|------|------|
| 1  |       |       |       |      |      |       |      |      |      |
| 2  | 8.87  | 10.03 | 8.35  | 6.62 | 7.31 | 9.74  | 8.41 | 9.14 | 2.66 |
| 3  | 8.23  | 9.38  | 8.8   | 6.14 | 5.28 | 8.57  | 8.01 | 3.84 | 2.03 |
| 4  | 8.78  | 9.38  | 8.7   | 6.55 | 6.62 | 9.28  | 7.18 | 7.4  | 1.77 |
| 5  | 8.8   | 9.54  | 8.55  | 6.71 | 6.26 | 8.94  | 7.55 | 7.55 | 1.95 |
| 6  | 8.58  | 9.3   | 8.51  | 5.14 | 6.52 | 8.67  | 7.24 | 6.76 | 3.14 |
| 7  | 8.36  | 9.73  | 8.22  | 6.48 | 5.48 | 9.32  | 7.71 | 7.1  | 1.23 |
| 8  | 8.51  | 10.02 | 8.46  | 6.74 | 5.77 | 9.62  | 7.13 | 8    | 2.57 |
| 9  | 7.46  | 10.28 | 8.04  | 6.02 | 4.32 | 8.86  | 6.82 | 6.57 | 1    |
| 10 | 8.18  | 10.04 | 8.73  | 6.27 | 5.72 | 9.7   | 7.47 | 7.22 | 3.76 |
| 11 | 8.13  | 9.65  | 8.02  | 8.24 | 5.9  | 8.4   | 9.63 | 4.75 | 1.58 |
| 12 | 7.56  | 9.71  | 8.06  | 7    | 6.47 | 8.72  | 9.15 | 8.12 | 2.54 |
| 13 | 7.54  | 9.7   | 7.9   | 6.64 | 6.37 | 8.63  | 8.55 | 8.09 | 2.14 |
| 14 | 7.81  | 9.5   | 7.67  | 6.65 | 6.76 | 8.71  | 8.83 | 8.18 | 1.98 |
| 15 | 10.61 | 9.06  | 11.13 | 6.74 | 7.74 | 7.15  | 6.74 | 6.15 | 5.15 |
| 16 | 9.74  | 9.9   | 9.94  | 6.72 | 8.25 | 8.37  | 7.58 | 6.98 | 0.79 |
| 17 | 8.69  | 9.44  | 8.8   | 5.72 | 7.58 | 8.46  | 7.63 | 7.13 | 0.86 |
| 18 | 9.82  | 9.4   | 9.57  | 7.55 | 8.96 | 9.49  | 2.24 | 0.24 | 0.24 |
| 19 | 10    | 8.86  | 9.93  | 7.1  | 8.67 | 8.93  | 2.36 | 0.77 | 1.77 |
| 20 | 7.99  | 9.51  | 8.19  | 7.23 | 5.46 | 8.13  | 8.11 | 6.62 | 1.14 |
| 21 | 7.6   | 9.62  | 7.95  | 7.07 | 5.51 | 7.73  | 8.66 | 5.8  | 0.85 |
| 22 | 8.38  | 9.36  | 8.27  | 6.79 | 5.96 | 8.22  | 7.71 | 7.21 | 1.26 |
| 23 | 9.03  | 9.42  | 7.6   | 7.77 | 6.5  | 10.46 | 7.25 | 8.26 | 2.42 |
| 24 | 8.89  | 9.22  | 7.91  | 7.03 | 6.86 | 9.9   | 7.21 | 7.63 | 2.6  |
| 25 | 9.44  | 9.45  | 7.42  | 6.93 | 7.65 | 9.96  | 6.6  | 6.18 | 1.05 |
| 26 | 8.79  | 10.01 | 8.38  | 6.96 | 7.14 | 9.2   | 8.99 | 9.27 | 3.81 |
| 27 | 9.5   | 10.17 | 8.3   | 6.55 | 7.39 | 10.32 | 8.54 | 9.92 | 2.36 |
| 28 | 10.29 | 10.12 | 8.49  | 6.33 | 7.5  | 10.57 | 8.33 | 9.52 | 4.01 |
| 29 | 8.35  | 9.19  | 8.15  | 6.36 | 6.31 | 8.94  | 8.69 | 8.63 | 2.36 |
| 30 | 8.37  | 9.42  | 8.4   | 6.35 | 6.53 | 9.2   | 8.63 | 8.62 | 1.56 |
| 31 | 8.59  | 9.34  | 8.5   | 6.06 | 6.32 | 8.86  | 8.71 | 8.14 | 0.15 |
| 32 | 8.95  | 9.66  | 8.56  | 6.56 | 6.27 | 10.05 | 7.49 | 5.12 | 1.7  |
| 33 | 8.52  | 9.44  | 8.78  | 7.25 | 6.22 | 8.98  | 7.04 | 6.11 | 1.2  |
| 34 | 8.63  | 9.57  | 8.91  | 7.28 | 6.75 | 8.78  | 6.92 | 6.35 | 0    |
| 35 | 8.79  | 9.18  | 7.98  | 6.37 | 8.27 | 9.56  | 7.25 | 8.98 | 0.73 |
| 36 | 8.76  | 9.37  | 8.02  | 5.97 | 7.95 | 9.32  | 7.3  | 9.37 | 2.46 |
| 37 | 9.83  | 9.17  | 7.93  | 6.68 | 7.99 | 9.59  | 7.16 | 9.88 | 2.24 |
| 38 | 8.73  | 8.94  | 7.55  | 5.86 | 6.65 | 9.27  | 7.47 | 6.93 | 2.44 |
| 39 | 8.73  | 8.94  | 7.55  | 5.86 | 6.65 | 9.27  | 7.47 | 6.93 | 2.44 |
| 40 | 8.24  | 9.31  | 8.11  | 6.17 | 6.92 | 8.58  | 7.19 | 7.88 | 0.15 |
| 41 | 8.76  | 9.17  | 8.05  | 6.41 | 7.26 | 8.7   | 6.64 | 8.08 | 0.18 |
| 42 | 9.27  | 9.18  | 7.82  | 6.37 | 7.79 | 9.58  | 6.93 | 8.19 | 2.49 |
| 43 | 8.4   | 8.56  | 7.53  | 5.46 | 7.41 | 8.63  | 6.17 | 5.41 | 2.56 |
| 44 | 8.47  | 9.3   | 8     | 7.34 | 7.22 | 9.68  | 6.6  | 8.36 | 0.3  |
| 45 | 8.04  | 9.42  | 8.21  | 6.82 | 6.66 | 8.94  | 6.46 | 7.82 | 1.95 |
| 46 | 8.76  | 9.02  | 8.03  | 6.07 | 7.51 | 8.97  | 5.47 | 6.88 | 3.2  |
| 47 | 8.88  | 10.42 | 8.53  | 9.1  | 6.19 | 9.54  | 7.49 | 8.63 | 0    |
| 48 | 8.15  | 10.41 | 8.54  | 8.62 | 5.29 | 8.79  | 6.75 | 7.92 | 2.66 |
| 49 | 10.44 | 10.47 | 9.34  | 8.59 | 5.69 | 8.95  | 6.82 | 8.39 | 0.52 |
| 50 | 8.58  | 8.38  | 7.29  | 5.28 | 6.97 | 8.85  | 6.51 | 5.91 | 0.15 |
| 51 | 9.29  | 8.56  | 8.16  | 5.82 | 7.19 | 9.68  | 5.44 | 7.72 | 1.02 |
| 52 | 8.93  | 8.44  | 7.55  | 5.26 | 7.46 | 9.41  | 5.36 | 7.3  | 2.04 |
| 53 | 8.39  | 9.54  | 7.33  | 6.01 | 7.08 | 9.13  | 5.48 | 7.2  | 1.98 |

<https://mc.manuscriptcentral.com/gut>

1  
2  
3  
4  
5  
6  
7  
8  
9  
10  
11  
12  
13  
14  
15  
16  
17  
18  
19  
20  
21  
22  
23  
24  
25  
26  
27  
28  
29  
30  
31  
32  
33  
34  
35  
36  
37  
38  
39  
40  
41  
42  
43  
44  
45  
46  
47  
48  
49  
50  
51  
52  
53  
54  
55  
56  
57  
58  
59  
60

|       |       |       |      |      |       |      |      |      |
|-------|-------|-------|------|------|-------|------|------|------|
| 8.45  | 9.8   | 7.59  | 6.4  | 7.2  | 9.5   | 6    | 8.14 | 0    |
| 9.33  | 9.59  | 8.5   | 6.55 | 7.98 | 8.98  | 4.03 | 6.55 | 0    |
| 8.78  | 9.54  | 7.77  | 7.66 | 5.93 | 9.69  | 7.26 | 6.12 | 1.57 |
| 9.17  | 9.44  | 7.79  | 6.47 | 7.26 | 9.96  | 8.14 | 10.1 | 1.08 |
| 10.02 | 9.33  | 7.93  | 6.98 | 7.88 | 10.51 | 7.6  | 9.68 | 3.08 |
| 9.15  | 9.58  | 8.51  | 5.41 | 6.31 | 9.7   | 8.83 | 7.12 | 2.41 |
| 8.32  | 9.95  | 7.56  | 6.72 | 7.47 | 9.56  | 8.19 | 9.19 | 2.55 |
| 8.32  | 10.11 | 7.72  | 6.04 | 7.11 | 9.74  | 7.67 | 9.31 | 1.76 |
| 10.88 | 10.77 | 10.63 | 6.3  | 6.08 | 8.62  | 7.25 | 7.78 | 2.49 |
| 8.96  | 9.54  | 8.58  | 6    | 4.49 | 8.58  | 7.02 | 6.08 | 3.11 |
| 7.76  | 9.33  | 8.35  | 6.6  | 5.62 | 8.63  | 7.52 | 7.12 | 3.08 |
| 7.69  | 8.78  | 7.56  | 5.65 | 6.61 | 8.14  | 6.82 | 6.35 | 2.21 |
| 11.45 | 10.07 | 10.71 | 6.07 | 6.26 | 8.85  | 6.85 | 7.21 | 3.85 |
| 9.06  | 9.01  | 9     | 6.01 | 7.08 | 7.65  | 0.2  | 0    | 0    |
| 8.23  | 9.77  | 8.6   | 6.05 | 5.8  | 9.08  | 9.19 | 8.07 | 0    |
| 8.13  | 9.84  | 8.59  | 6.29 | 5.69 | 9.1   | 9.3  | 7.71 | 0.83 |
| 7.6   | 9.61  | 8.52  | 5.95 | 5.61 | 8.73  | 9.04 | 7.47 | 1.84 |
| 8.56  | 9.36  | 7.27  | 6.55 | 6.29 | 9.38  | 8.33 | 8.69 | 0.43 |
| 9.03  | 8.84  | 7.31  | 6.11 | 6.8  | 9.05  | 7.38 | 8.3  | 0.77 |
| 8.77  | 9.1   | 7.32  | 6.3  | 6.63 | 9.1   | 7.73 | 8.26 | 1.98 |
| 11.88 | 9.16  | 13.06 | 5.16 | 5.16 | 5.16  | 6.75 | 6.16 | 5.16 |
| 7.36  | 9.47  | 7.25  | 6.47 | 6.7  | 8.63  | 7.54 | 7.83 | 0.72 |
| 8.22  | 9.48  | 7.61  | 6.58 | 5.86 | 8.51  | 8.35 | 8.41 | 2.12 |
| 9.09  | 10.46 | 8.68  | 8.47 | 5.99 | 8.76  | 6.7  | 7.18 | 1.18 |
| 10    | 10.01 | 9.34  | 8    | 5.61 | 9.19  | 6.76 | 7.66 | 1.91 |
| 10.28 | 9.53  | 8.31  | 8.1  | 7.05 | 10.22 | 8.04 | 7.81 | 3.35 |
| 9.63  | 7.97  | 8.61  | 5    | 7    | 7.79  | 3.32 | 4.9  | 1    |
| 9.3   | 8.17  | 8.61  | 5.44 | 7.5  | 7.69  | 2.44 | 1.86 | 0.86 |
| 8.35  | 7.74  | 7.09  | 5.23 | 7.05 | 8.18  | 1.77 | 1.77 | 1.77 |
| 8.4   | 8.69  | 6.03  | 6.29 | 6.12 | 9.94  | 7.37 | 6.78 | 1.01 |
| 9.43  | 8.5   | 6.97  | 6.31 | 6.56 | 9.97  | 5.88 | 9.2  | 1.59 |
| 8.73  | 8.98  | 7.52  | 6.45 | 6.17 | 9.16  | 6.71 | 8.05 | 1.11 |
| 9.53  | 8.31  | 6.5   | 6.6  | 6.53 | 10.21 | 6.55 | 7.81 | 1.16 |
| 8.48  | 7.19  | 7.82  | 5.21 | 6.74 | 7.48  | 3.04 | 0.45 | 0.45 |
| 7.5   | 7.96  | 7.16  | 4.25 | 6.52 | 6.79  | 3.06 | 0.25 | 0.25 |
| 7.36  | 7.77  | 7.91  | 4.34 | 6.08 | 6.94  | 3.51 | 4.1  | 0    |
| 8.35  | 8.19  | 8.05  | 5.7  | 7.97 | 8.15  | 1.64 | 0    | 0    |
| 7.92  | 7.04  | 7.44  | 4.66 | 6.92 | 7.31  | 1.34 | 2.34 | 2.34 |
| 7.51  | 7.21  | 7.05  | 4.27 | 7    | 7.35  | 2.1  | 1.1  | 1.1  |
| 7.84  | 7.58  | 6.75  | 3.77 | 6.89 | 6.92  | 1.89 | 4.01 | 1.31 |
| 9.37  | 6.66  | 8.62  | 8.46 | 9.85 | 8.77  | 2.41 | 2.41 | 2.41 |
| 8.57  | 7.89  | 8.69  | 5.14 | 7.58 | 8.09  | 3.06 | 1.06 | 3.06 |
| 8.72  | 8.29  | 8.15  | 5.18 | 7.84 | 8.44  | 1.65 | 0    | 0    |
| 8.11  | 8.3   | 8.41  | 4.77 | 6.45 | 7.64  | 4.19 | 5.39 | 1.87 |
| 8.38  | 7.95  | 7.99  | 5.27 | 7.66 | 8.04  | 0.75 | 3.45 | 0.75 |
| 9.06  | 8.57  | 8.28  | 6    | 7.12 | 8.28  | 5.58 | 5.08 | 0.88 |
| 9.97  | 8.52  | 8.49  | 6.1  | 7.02 | 7.65  | 1.3  | 3.3  | 0.3  |
| 9.91  | 8.62  | 7.34  | 5.51 | 7.41 | 7.79  | 2.29 | 0.71 | 0.71 |
| 9.57  | 8.27  | 8.98  | 6.45 | 8.32 | 8.58  | 2.71 | 2.9  | 1.48 |
| 7.49  | 8.24  | 7.14  | 5.23 | 6.08 | 8.43  | 7.38 | 5.34 | 0    |
| 7.76  | 8.93  | 7.84  | 5.53 | 6.05 | 8.52  | 7.19 | 6.81 | 1.33 |
| 8.03  | 8.81  | 8.56  | 5.71 | 6.3  | 8.59  | 7.04 | 6.93 | 1.62 |

<https://mc.manuscriptcentral.com/gut>

|    |       |       |       |      |      |       |      |      |      |
|----|-------|-------|-------|------|------|-------|------|------|------|
| 1  |       |       |       |      |      |       |      |      |      |
| 2  | 7.64  | 8.97  | 8.47  | 5.13 | 6.81 | 8.46  | 7.15 | 5.59 | 1.27 |
| 3  | 8.78  | 9.52  | 8.61  | 5.98 | 6.62 | 9.5   | 8.73 | 7.8  | 1.52 |
| 4  | 9.29  | 9.39  | 8.64  | 6.45 | 6.53 | 9.64  | 8.24 | 9.16 | 2.65 |
| 5  | 8.46  | 9.58  | 8.45  | 5.6  | 5.79 | 8.81  | 7.77 | 7.25 | 0.74 |
| 6  | 8.56  | 9.61  | 8.44  | 5.22 | 5.87 | 8.81  | 7.86 | 7.4  | 1.27 |
| 7  | 8.86  | 9.39  | 8.51  | 6.64 | 7.6  | 9.74  | 8.21 | 6.56 | 2.09 |
| 8  | 9.12  | 10.11 | 9.25  | 7.7  | 5.01 | 9.4   | 8.34 | 8.56 | 3.65 |
| 9  | 8.23  | 10.08 | 8.62  | 7.95 | 4.93 | 9     | 8.57 | 8.49 | 0.98 |
| 10 | 10.47 | 9.74  | 9.52  | 8.58 | 6.03 | 9.36  | 8.15 | 7.79 | 3.33 |
| 11 | 9.42  | 10.69 | 8.58  | 7.52 | 6.16 | 10.06 | 8.24 | 7.21 | 1.76 |
| 12 | 9.27  | 10.05 | 8.67  | 6.95 | 7.07 | 10.05 | 8.36 | 8.24 | 1.75 |
| 13 | 9.65  | 10.28 | 8.51  | 7.13 | 7.46 | 10.26 | 8.07 | 9.19 | 0.38 |
| 14 | 8.93  | 10.5  | 8.62  | 7.13 | 6.66 | 9.59  | 8.51 | 7.59 | 2.65 |
| 15 | 7.55  | 9.32  | 7.69  | 4.87 | 6.16 | 9.28  | 7.71 | 5.73 | 1.8  |
| 16 | 7.71  | 9.77  | 8.12  | 4.97 | 5.97 | 9.32  | 7.75 | 8.62 | 2.32 |
| 17 | 9.4   | 9.24  | 8.68  | 5.85 | 6.62 | 9.32  | 6.47 | 7.52 | 2.95 |
| 18 | 9.34  | 8.83  | 7.22  | 5.55 | 5.83 | 9.93  | 7.26 | 7.26 | 2.58 |
| 19 | 9.03  | 9.18  | 8.18  | 6.13 | 6.37 | 9.67  | 7.16 | 8.98 | 1.67 |
| 20 | 9.19  | 9.23  | 8.1   | 6.27 | 6.65 | 9.97  | 6.19 | 8.73 | 2.1  |
| 21 | 8.4   | 9.06  | 7.65  | 6.27 | 4.51 | 9.01  | 7.77 | 5.91 | 1.93 |
| 22 | 9.56  | 9.4   | 8.29  | 6.62 | 7.08 | 10.24 | 7.77 | 9.73 | 1.54 |
| 23 | 8.16  | 9.52  | 8.52  | 6.56 | 5.69 | 9.01  | 7.63 | 8.04 | 0    |
| 24 | 8.44  | 8.9   | 8.12  | 7.15 | 6.43 | 9.18  | 8.42 | 8.67 | 1.11 |
| 25 | 8.62  | 9.43  | 8.16  | 7.72 | 6.66 | 9.09  | 8.51 | 8.66 | 3.74 |
| 26 | 10.63 | 9.79  | 10.18 | 8.74 | 6.32 | 8.64  | 5.74 | 7.32 | 4.74 |
| 27 | 7.8   | 8.27  | 7.46  | 5.72 | 3.68 | 8.29  | 7.78 | 6.09 | 0.36 |
| 28 | 7.23  | 7.97  | 7.17  | 6.6  | 6.08 | 8.6   | 8.3  | 8.08 | 2.38 |
| 29 | 7.61  | 8.33  | 7.49  | 6.27 | 5.97 | 8.79  | 7.51 | 8.21 | 0    |
| 30 | 7.54  | 8.24  | 7.94  | 5.9  | 4.9  | 9.75  | 7.48 | 8.69 | 1.9  |
| 31 | 7.04  | 7.01  | 7.91  | 3.76 | 6.51 | 7.37  | 2.76 | 1.76 | 1.76 |
| 32 | 8.05  | 7.41  | 7.67  | 5.3  | 5.93 | 7.26  | 0.72 | 4.97 | 0.72 |
| 33 | 7.21  | 7.03  | 7.77  | 4.05 | 6.53 | 7.44  | 1.88 | 0.88 | 0.88 |
| 34 | 7.22  | 7.07  | 7.63  | 3.96 | 6.42 | 7.04  | 0.96 | 0.96 | 0.96 |
| 35 | 6.93  | 7.71  | 6.29  | 5.29 | 5.22 | 7.45  | 4.85 | 4.61 | 0    |
| 36 | 7.27  | 7.47  | 7.2   | 4.83 | 5.71 | 7.42  | 3.91 | 5.59 | 1.25 |
| 37 | 7.34  | 7.43  | 6.73  | 5.01 | 6    | 8.08  | 3.67 | 6.4  | 0.77 |
| 38 | 8.66  | 7.59  | 6.52  | 5.43 | 6.05 | 8.2   | 4.03 | 6.71 | 1.17 |
| 39 | 8.17  | 8.68  | 7.45  | 4.52 | 4.16 | 8.33  | 8.05 | 7.22 | 2.68 |
| 40 | 8.46  | 9.69  | 8.83  | 8.38 | 6.16 | 9.15  | 7.85 | 8.79 | 1.46 |
| 41 | 7.82  | 9.83  | 8.25  | 6.67 | 5.12 | 8.75  | 8.26 | 8.11 | 0.42 |
| 42 | 10.12 | 10.08 | 10.35 | 6.14 | 2.23 | 7.69  | 8.01 | 6.48 | 3.23 |
| 43 | 8.17  | 8.87  | 7.92  | 6.37 | 5.9  | 8.55  | 7.56 | 5.61 | 1.4  |
| 44 | 10.6  | 9.87  | 10.72 | 6.1  | 4.51 | 7.51  | 7.51 | 7.68 | 4.51 |
| 45 | 8.7   | 9.07  | 7.81  | 6.26 | 6.02 | 9.36  | 7.95 | 9.09 | 1.45 |
| 46 | 9.55  | 8.98  | 7.92  | 6.76 | 6.77 | 9.68  | 7.04 | 9.08 | 0.94 |
| 47 | 7.09  | 9.27  | 8.22  | 7.17 | 1.68 | 7.09  | 8.89 | 0.68 | 0.68 |
| 48 | 8.52  | 9.09  | 8.35  | 7.03 | 6.15 | 7.94  | 7.66 | 7.28 | 0    |
| 49 | 8.16  | 9.12  | 8.19  | 7.11 | 5.03 | 8.17  | 7.96 | 7.51 | 1.86 |
| 50 | 8.36  | 8.74  | 8.08  | 6.48 | 5.68 | 8.05  | 7.4  | 7.05 | 1.84 |
| 51 | 8.22  | 8.43  | 7.73  | 4.62 | 4.96 | 8.65  | 7.12 | 7.25 | 0    |
| 52 | 7.49  | 8     | 7.27  | 4.53 | 6.68 | 8.97  | 6.2  | 8.18 | 1.53 |
| 53 | 7.43  | 7.83  | 7.21  | 4.83 | 6.14 | 8.59  | 5.72 | 7.72 | 0    |

|      |       |      |      |      |      |      |      |      |
|------|-------|------|------|------|------|------|------|------|
| 7.79 | 8.27  | 8.07 | 5.54 | 4.79 | 8.5  | 5.88 | 6.94 | 2.37 |
| 8.97 | 8.74  | 8.45 | 6.85 | 4.8  | 9.31 | 5.8  | 4.68 | 2.1  |
| 7.57 | 9.5   | 7.79 | 7.75 | 4.76 | 8.57 | 6.52 | 8.07 | 2.17 |
| 7.91 | 9.62  | 7.52 | 7.86 | 5.29 | 8.44 | 6.29 | 7.8  | 0.49 |
| 8.7  | 8.4   | 9.08 | 5.8  | 5.64 | 6.76 | 1.55 | 3.14 | 1.55 |
| 7.71 | 8.6   | 7.57 | 6.57 | 5.12 | 8.07 | 8.38 | 6.94 | 0    |
| 6.14 | 8.82  | 7.92 | 5.22 | 3.77 | 6.53 | 7.39 | 5.07 | 0    |
| 6.12 | 8.91  | 8.01 | 4.97 | 3.74 | 6.55 | 7.28 | 4.78 | 0.94 |
| 8.39 | 7.38  | 7.7  | 4.73 | 6.73 | 7.4  | 1.27 | 0.27 | 0.27 |
| 8.1  | 8.03  | 7.41 | 5.69 | 6.45 | 8.16 | 5.11 | 7.09 | 0.55 |
| 8.59 | 8.77  | 6.94 | 5.65 | 5.84 | 9.53 | 6.69 | 6.1  | 2.65 |
| 8.27 | 8.6   | 7.44 | 6.14 | 6.62 | 9.03 | 6.41 | 7.59 | 0.89 |
| 8.9  | 8.74  | 7.45 | 6.83 | 6    | 8.85 | 6.92 | 7.37 | 1.89 |
| 9.75 | 8.37  | 7.15 | 5.45 | 6.76 | 9.99 | 6.35 | 7.07 | 2.45 |
| 9.99 | 10.75 | 10.5 | 7.19 | 4.13 | 7    | 4.87 | 4.54 | 2.54 |
| 7.89 | 9.48  | 8.22 | 5.53 | 5.39 | 7.88 | 7.65 | 6.9  | 1.39 |
| 7.45 | 8.74  | 7.12 | 5.95 | 5.88 | 8.02 | 7.84 | 7.09 | 1.23 |
| 8.18 | 9.42  | 8.39 | 6.07 | 5.21 | 7.64 | 7.63 | 6.94 | 1.75 |

1  
2  
3  
4  
5  
6  
7  
8  
9  
10  
11  
12  
13  
14  
15  
16  
17  
18  
19  
20  
21  
22  
23  
24  
25  
26  
27  
28  
29  
30  
31  
32  
33  
34  
35  
36  
37  
38  
39  
40  
41  
42  
43  
44  
45  
46  
47  
48  
49  
50  
51  
52  
53  
54  
55  
56  
57  
58  
59  
60

| PECAM1 | PFKFB1 | PFKFB4 | PGK1  | PIK3CA | PIK3CD | PIK3CG | PIK3R1 | PIK3R2 |
|--------|--------|--------|-------|--------|--------|--------|--------|--------|
| 8.32   | 5.08   | 3.15   | 10.63 | 6.84   | 7.56   | 8.5    | 7.34   | 8.1    |
| 8.9    | 4.74   | 4.84   | 10.89 | 6.39   | 6.49   | 7.38   | 7.31   | 7.84   |
| 8.36   | 4.4    | 5.67   | 11.11 | 6.35   | 6.65   | 7.38   | 7.3    | 8.2    |
| 9.56   | 3.5    | 5.5    | 11.46 | 7.02   | 6.11   | 7.4    | 8.64   | 8.83   |
| 2.59   | 6.53   | 2.59   | 8.62  | 7.01   | 7.28   | 8.08   | 7.26   | 8.28   |
| 8.11   | 4.49   | 4.35   | 10.98 | 6.56   | 6.97   | 7.43   | 7.58   | 7.94   |
| 8.55   | 3.5    | 4.73   | 11.09 | 6.31   | 6.98   | 7.86   | 7.58   | 7.77   |
| 8.28   | 2.39   | 4.92   | 12.67 | 7.12   | 6.7    | 7.89   | 8.5    | 9.38   |
| 8.72   | 2.95   | 4.37   | 12.57 | 7.08   | 7.31   | 7.95   | 8.13   | 8.58   |
| 7.26   | 3.91   | 5      | 11.57 | 6.48   | 6.21   | 6.89   | 7.09   | 7.94   |
| 8.39   | 2.96   | 5.51   | 12.15 | 6.67   | 5.96   | 7.4    | 7.47   | 8      |
| 9.03   | 3.85   | 4.77   | 12.04 | 6.73   | 6.7    | 7.27   | 7.76   | 8.36   |
| 7.83   | 3.77   | 5.75   | 11.13 | 6.52   | 6.22   | 7.07   | 7.78   | 8.82   |
| 9.07   | 4.07   | 5.51   | 11.37 | 6.77   | 7      | 7.84   | 7.67   | 8.72   |
| 8.45   | 3.77   | 1.77   | 12.81 | 7.44   | 7.32   | 9.59   | 9.45   | 10.22  |
| 8.64   | 4.75   | 4.94   | 11.39 | 7.05   | 7.56   | 8.26   | 7.51   | 8      |
| 7.68   | 4.87   | 5.29   | 11.25 | 6.9    | 7.02   | 7.72   | 7.66   | 8.43   |
| 8.14   | 5.01   | 6.67   | 11.88 | 7.14   | 6.93   | 7.49   | 7.96   | 8.46   |
| 9.19   | 3.9    | 2.7    | 11.84 | 7.44   | 8.75   | 9.59   | 9.93   | 9.01   |
| 9.65   | 2.31   | 4.12   | 11.66 | 6.58   | 7.91   | 8.75   | 8.73   | 8.58   |
| 9.89   | 3.67   | 3.96   | 11.49 | 7.17   | 8.89   | 9.15   | 9.26   | 8.48   |
| 9.1    | 3.32   | 6.03   | 11.94 | 7.46   | 6.03   | 6.94   | 8.55   | 8.57   |
| 9.15   | 3.2    | 6.18   | 11.93 | 7.29   | 6.39   | 7.09   | 8.54   | 8.65   |
| 8.88   | 3.35   | 5.39   | 11.77 | 7.4    | 6.49   | 6.97   | 8.52   | 8.56   |
| 8.41   | 2.75   | 6.56   | 11.76 | 6.07   | 6.65   | 7.13   | 7.32   | 8.93   |
| 8.51   | 2.71   | 4.77   | 12.4  | 6.76   | 5.62   | 6.52   | 7.72   | 9.29   |
| 8.25   | 2.11   | 5.16   | 12.32 | 6.67   | 5.84   | 6.65   | 7.91   | 9.48   |
| 8.24   | 5.16   | 3.92   | 11.63 | 6.72   | 6.39   | 7.69   | 7.43   | 8.96   |
| 7.18   | 5.53   | 2.87   | 10.69 | 6.43   | 6.97   | 7.39   | 7.42   | 8.45   |
| 8.56   | 4.9    | 4.63   | 10.79 | 6.34   | 7.02   | 7.85   | 7.36   | 8.55   |
| 7.85   | 5.33   | 4.84   | 10.93 | 6      | 6.57   | 7.23   | 7.03   | 8.55   |
| 7.91   | 5.17   | 3.29   | 10.71 | 6.82   | 7.32   | 8.04   | 7.32   | 8.69   |
| 8.99   | 5.43   | 3.43   | 10.19 | 6.82   | 8.97   | 8.89   | 8.12   | 7.91   |
| 9.35   | 2.38   | 5.7    | 11.77 | 6.92   | 6.66   | 6.95   | 8.02   | 8.9    |
| 9.15   | 2.93   | 5.59   | 12.21 | 6.64   | 6.3    | 6.79   | 7.42   | 8.79   |
| 8.95   | 0.47   | 4.72   | 11.72 | 6.96   | 6.58   | 7.07   | 8.13   | 9.17   |
| 8.22   | 3.45   | 3.62   | 11.96 | 6.35   | 7.8    | 8.88   | 8.22   | 7.98   |
| 8.9    | 3.1    | 6.38   | 11.81 | 6.03   | 7.44   | 8.4    | 6.99   | 7.99   |
| 9.24   | 3.17   | 5.27   | 11.46 | 6.17   | 7.67   | 8.97   | 7.87   | 7.87   |
| 8.99   | 0      | 4.2    | 11.27 | 6.07   | 8.09   | 8.84   | 7.78   | 7.6    |
| 7.65   | 4.51   | 4.1    | 10.66 | 6.21   | 6.89   | 7.62   | 6.51   | 7.25   |
| 6.74   | 4.42   | 3.9    | 11    | 6.01   | 6.45   | 7.25   | 6.31   | 7.33   |
| 6.93   | 4.74   | 2.54   | 10.56 | 6.03   | 6.33   | 7.63   | 6      | 7.05   |
| 6.94   | 4.27   | 3.72   | 11.34 | 5.77   | 5.46   | 6.98   | 6.58   | 7.11   |
| 6.45   | 4.86   | 5.45   | 14.96 | 7.5    | 5.67   | 7.5    | 8.38   | 9.84   |
| 8.49   | 1.9    | 4.02   | 12.16 | 6.15   | 5.93   | 7.55   | 7.07   | 7.52   |
| 9.03   | 2.58   | 4.58   | 12.29 | 6.28   | 5.46   | 7.36   | 7.26   | 7.55   |
| 9.1    | 2.98   | 4.67   | 11.75 | 6.86   | 6      | 7.5    | 7.98   | 7.28   |
| 9.43   | 3.63   | 6.36   | 12.69 | 7.2    | 7.62   | 8.74   | 8.56   | 9.04   |
| 9.15   | 1.59   | 6.61   | 12.64 | 7.18   | 6.87   | 6.99   | 8.22   | 8.76   |
| 8.9    | 4.08   | 6.08   | 12.63 | 7.03   | 7.44   | 7.65   | 8.02   | 8.43   |

<https://mc.manuscriptcentral.com/gut>

1  
2  
3  
4  
5  
6  
7  
8  
9  
10  
11  
12  
13  
14  
15  
16  
17  
18  
19  
20  
21  
22  
23  
24  
25  
26  
27  
28  
29  
30  
31  
32  
33  
34  
35  
36  
37  
38  
39  
40  
41  
42  
43  
44  
45  
46  
47  
48  
49  
50  
51  
52  
53  
54  
55  
56  
57  
58  
59  
60

|      |      |      |       |      |      |      |      |       |
|------|------|------|-------|------|------|------|------|-------|
| 9.42 | 3.54 | 5.89 | 12.43 | 7.03 | 7.49 | 8.15 | 8.24 | 8.46  |
| 7.06 | 4.28 | 5.55 | 11.67 | 6.52 | 6.41 | 6.86 | 8.12 | 8.83  |
| 8.31 | 4.36 | 5.68 | 11.05 | 6.74 | 6.3  | 7.21 | 8.15 | 8.83  |
| 8.15 | 4.35 | 5.86 | 11.52 | 6.6  | 5.84 | 7.16 | 7.98 | 8.95  |
| 7.72 | 4.05 | 4.14 | 11.04 | 6.76 | 6.43 | 7.43 | 8.28 | 8.72  |
| 9.01 | 3.93 | 4.14 | 11.33 | 7.15 | 8.13 | 8.42 | 8.46 | 7.83  |
| 9.2  | 3.25 | 4.83 | 12.07 | 7.11 | 6.13 | 7.22 | 8.4  | 8.83  |
| 7.92 | 2.46 | 5.09 | 12.1  | 7.26 | 5    | 5.81 | 8.34 | 8.72  |
| 8.62 | 2.02 | 5.3  | 12.39 | 7.05 | 6.14 | 7.18 | 9.18 | 9.07  |
| 8.84 | 2.75 | 6.95 | 12.73 | 6.58 | 5.6  | 8    | 7.47 | 8.13  |
| 9.13 | 4    | 5.79 | 12.03 | 5.93 | 6.42 | 8.52 | 7.1  | 8.28  |
| 8.71 | 3.4  | 5.72 | 12.15 | 6.37 | 5.54 | 7.61 | 7.01 | 8.14  |
| 9.06 | 3.68 | 5.79 | 11.97 | 6.23 | 5.93 | 7.93 | 7.34 | 8.27  |
| 5.15 | 7.74 | 5.15 | 10.79 | 6.15 | 7.47 | 7.15 | 8.15 | 12.2  |
| 7.16 | 6.31 | 4.96 | 12.69 | 7.45 | 6.72 | 7.95 | 8.9  | 10.15 |
| 7.54 | 5.41 | 4.32 | 11.62 | 7.35 | 7.14 | 8.14 | 8.22 | 9.15  |
| 0.24 | 8.16 | 0.24 | 8.84  | 7.35 | 8.36 | 8.41 | 9.04 | 9.19  |
| 3.1  | 7.67 | 0.77 | 9.58  | 7.04 | 8.34 | 8.73 | 8.37 | 9.48  |
| 7.22 | 3.84 | 4.66 | 11.78 | 6.39 | 6.02 | 6.85 | 7.98 | 8.9   |
| 6.66 | 4.26 | 4.3  | 11.9  | 6.32 | 6.12 | 6.96 | 7.61 | 8.73  |
| 6.93 | 4.2  | 4.88 | 11.41 | 6.76 | 6.59 | 7.59 | 7.8  | 8.88  |
| 9.36 | 2.27 | 5.38 | 11.72 | 7.27 | 6.23 | 7.26 | 7.77 | 8.08  |
| 9.11 | 4.28 | 4.8  | 11.54 | 7.2  | 6.14 | 6.86 | 7.73 | 8.27  |
| 8.86 | 5.3  | 3.37 | 10.31 | 7.68 | 6.18 | 7.59 | 7.97 | 7.41  |
| 9.42 | 4.54 | 5.22 | 11.95 | 6.83 | 7.25 | 8.71 | 8.15 | 8.82  |
| 9.33 | 3.74 | 5.29 | 12.23 | 7.12 | 6.66 | 8.12 | 8.1  | 8.66  |
| 9.09 | 3.28 | 5.98 | 12.57 | 6.86 | 6.45 | 7.43 | 8.31 | 8.73  |
| 8.72 | 5.06 | 5.94 | 11.54 | 6.64 | 6.83 | 8.2  | 7.75 | 8.27  |
| 8.82 | 4.44 | 6.07 | 11.65 | 6.73 | 6.58 | 7.87 | 7.9  | 8.12  |
| 8.58 | 5.4  | 5.32 | 11.6  | 6.85 | 7.07 | 8.12 | 7.93 | 8.09  |
| 8.58 | 5.44 | 4.76 | 11.86 | 7.28 | 6.94 | 7.82 | 8.45 | 8.88  |
| 7.58 | 5.37 | 5.41 | 12.29 | 6.86 | 6.57 | 7.5  | 8.62 | 9.14  |
| 7.37 | 5.31 | 5.2  | 12.23 | 6.84 | 7.08 | 7.93 | 8.98 | 9.06  |
| 8.23 | 5.16 | 5.28 | 11.3  | 6.95 | 7.25 | 7.8  | 7.53 | 8.24  |
| 8    | 5.24 | 5.66 | 11.56 | 7.08 | 7.33 | 7.83 | 7.01 | 8     |
| 8.2  | 5.31 | 5.17 | 11.57 | 6.84 | 7.33 | 7.7  | 7.7  | 8.3   |
| 8.4  | 4.83 | 3.9  | 10.57 | 7.12 | 7.64 | 8.43 | 7.68 | 7.69  |
| 8.4  | 4.83 | 3.9  | 10.57 | 7.12 | 7.64 | 8.43 | 7.68 | 7.69  |
| 7.46 | 5.01 | 3.96 | 11.52 | 7.45 | 7.09 | 8.23 | 7.66 | 8.27  |
| 7.97 | 4.98 | 4.08 | 11.22 | 7.17 | 7.3  | 8.02 | 7.65 | 8.17  |
| 7.91 | 4.93 | 3.77 | 11.38 | 7.65 | 7.36 | 7.73 | 7.73 | 8.08  |
| 7.45 | 5.51 | 3.36 | 9.98  | 6.82 | 8.13 | 8.63 | 7.88 | 7.89  |
| 8.7  | 4.88 | 5.16 | 11.64 | 7.17 | 6.88 | 7.74 | 7.77 | 8.54  |
| 8.87 | 4.9  | 5.12 | 12.09 | 7.11 | 6.56 | 7.37 | 7.58 | 9.09  |
| 8    | 5.74 | 3.2  | 11.11 | 7.09 | 7.07 | 8.02 | 7.69 | 8.42  |
| 8.5  | 2.53 | 5.81 | 11.41 | 7.08 | 6.08 | 6.84 | 9.23 | 9.3   |
| 7.91 | 3.25 | 5.91 | 12.1  | 6.79 | 5.6  | 5.75 | 8.96 | 9.2   |
| 8.59 | 3.52 | 5.1  | 11.98 | 7.02 | 6.89 | 7.41 | 9.49 | 9.88  |
| 8.13 | 5.86 | 3.61 | 9.78  | 6.94 | 8.18 | 8.5  | 7.05 | 7.56  |
| 8.48 | 5.9  | 3.34 | 10.21 | 7.14 | 7.24 | 7.82 | 7.9  | 8.42  |
| 8.04 | 5.88 | 3.92 | 10.01 | 7.03 | 7.13 | 7.81 | 7.88 | 8.11  |
| 7.07 | 6.26 | 4.4  | 10.34 | 6.57 | 6.75 | 7.65 | 7.27 | 7.26  |

<https://mc.manuscriptcentral.com/gut>



1  
2  
3  
4  
5  
6  
7  
8  
9  
10  
11  
12  
13  
14  
15  
16  
17  
18  
19  
20  
21  
22  
23  
24  
25  
26  
27  
28  
29  
30  
31  
32  
33  
34  
35  
36  
37  
38  
39  
40  
41  
42  
43  
44  
45  
46  
47  
48  
49  
50  
51  
52  
53  
54  
55  
56  
57  
58  
59  
60

|      |      |      |       |       |      |      |       |       |
|------|------|------|-------|-------|------|------|-------|-------|
| 7.31 | 5.53 | 5.28 | 10.79 | 6.76  | 6.68 | 7.53 | 7     | 7.43  |
| 5.42 | 7.2  | 3.59 | 10.68 | 7.04  | 7.36 | 8.27 | 7.81  | 8.37  |
| 8.78 | 5.25 | 3.71 | 11.72 | 7.33  | 8.45 | 8.41 | 8.5   | 8.09  |
| 9.71 | 4.4  | 6.36 | 11.63 | 7.17  | 6.83 | 7.6  | 8.43  | 8.54  |
| 9.69 | 4.19 | 6.58 | 11.27 | 7.16  | 6.95 | 7.67 | 8.63  | 8.72  |
| 9.3  | 1.41 | 3.41 | 11.96 | 7.16  | 7.84 | 9.43 | 8.55  | 8.12  |
| 8.42 | 3.72 | 6.32 | 12.4  | 6.5   | 5.25 | 6.71 | 8.09  | 8.87  |
| 8.73 | 2.34 | 6.22 | 12.37 | 6.5   | 5.8  | 6.63 | 8.07  | 8.69  |
| 7.92 | 4.08 | 6.08 | 14.01 | 7.66  | 4.49 | 8.92 | 10.38 | 11.58 |
| 8.53 | 3.38 | 4.11 | 11.92 | 10.23 | 7.22 | 8.12 | 8.9   | 8.8   |
| 8.22 | 2.81 | 4.58 | 12.65 | 9.41  | 6.13 | 7.4  | 8.14  | 8.01  |
| 6.58 | 4.75 | 4.48 | 11.87 | 11.04 | 6.23 | 7.35 | 7.36  | 6.95  |
| 7.35 | 4.58 | 5.43 | 13.88 | 9.67  | 4.85 | 7.93 | 9.43  | 10.6  |
| 0.79 | 6.46 | 0    | 8.13  | 7.99  | 7.61 | 8.7  | 6.57  | 8.55  |
| 7.93 | 3.12 | 6.3  | 11.46 | 6.17  | 4.41 | 5.23 | 6.98  | 8.45  |
| 8.15 | 1.83 | 5.81 | 11.48 | 6.23  | 4.23 | 5.36 | 7.18  | 8.51  |
| 7.93 | 2.52 | 4.91 | 11.37 | 6.37  | 4.56 | 5.77 | 7.01  | 8.23  |
| 8.78 | 2.43 | 5.97 | 11.96 | 6.47  | 7.75 | 8.33 | 7.61  | 7.39  |
| 7.66 | 4.81 | 5.37 | 11.53 | 6.41  | 7.49 | 7.67 | 7.19  | 7.51  |
| 8.2  | 4.48 | 5.95 | 11.86 | 6.47  | 7.6  | 7.89 | 7.68  | 7.25  |
| 7.16 | 5.16 | 6.16 | 13.87 | 6.75  | 7.16 | 7.75 | 9.41  | 12.48 |
| 8.07 | 2.94 | 4.46 | 11.52 | 6.59  | 5.73 | 6.82 | 6.26  | 7.03  |
| 9    | 2.86 | 4.54 | 11.43 | 6.44  | 6.69 | 8.41 | 7.41  | 7.56  |
| 7.52 | 2.77 | 5.43 | 12.27 | 7.78  | 5.57 | 6.61 | 8.61  | 10.19 |
| 8.14 | 3.23 | 5.08 | 12.37 | 7.33  | 5.81 | 7.45 | 8.97  | 10.64 |
| 9.05 | 3.54 | 5.19 | 11.7  | 7.32  | 6.32 | 7.71 | 8.5   | 9.37  |
| 4.32 | 6.32 | 1    | 9.92  | 7.15  | 7.35 | 8.36 | 6.9   | 8.39  |
| 1.86 | 6.67 | 1.86 | 8.69  | 7.35  | 7.5  | 8.12 | 6.25  | 8.21  |
| 1.77 | 6.52 | 2.77 | 8.76  | 6.47  | 6.63 | 8.35 | 6.41  | 7.55  |
| 8.56 | 0.01 | 3.59 | 9.74  | 5.65  | 5.94 | 7.45 | 6.85  | 7.23  |
| 8.44 | 1.18 | 4.68 | 10.22 | 5.97  | 5.5  | 6.33 | 7.53  | 7.8   |
| 8.25 | 2.43 | 2.43 | 10.96 | 6.06  | 4.75 | 6.65 | 7.32  | 8.25  |
| 8.81 | 3.16 | 3.33 | 9.87  | 6.31  | 5.77 | 6.76 | 7.63  | 7.51  |
| 2.45 | 5.21 | 0.45 | 8.77  | 5.84  | 6.56 | 7.74 | 6.58  | 7.73  |
| 2.25 | 5.21 | 0.25 | 8.55  | 6.4   | 6.42 | 7.59 | 5.9   | 6.87  |
| 2.51 | 5.27 | 0    | 8.94  | 6.47  | 6.16 | 7.34 | 6.15  | 7.08  |
| 0    | 6.84 | 0    | 7.39  | 6.9   | 6.92 | 7.55 | 6.89  | 7.35  |
| 3.34 | 5.34 | 1.34 | 7.86  | 6.19  | 6.89 | 7.53 | 6.24  | 7.29  |
| 1.1  | 3.9  | 1.1  | 7.89  | 6.18  | 6.45 | 7.89 | 5.68  | 7.33  |
| 2.89 | 4.4  | 2.31 | 7.94  | 6.4   | 6.65 | 7.39 | 5.12  | 7.05  |
| 3.41 | 8    | 2.41 | 7.5   | 4     | 7    | 4.41 | 8.37  | 6.66  |
| 4.86 | 5.86 | 2.06 | 8.78  | 7.16  | 7.41 | 8.58 | 6.91  | 8.63  |
| 0.33 | 6.13 | 0.33 | 8.03  | 7.55  | 7.78 | 8.67 | 6.73  | 8.13  |
| 5.39 | 3.87 | 0.87 | 10.26 | 6.7   | 7.04 | 7.64 | 7.51  | 8.47  |
| 3.33 | 5.61 | 0    | 8.97  | 6.76  | 7.65 | 8.19 | 7.18  | 8.17  |
| 6.3  | 5.25 | 2.3  | 9.91  | 6.96  | 7.59 | 7.94 | 7.02  | 8.4   |
| 3.75 | 5.97 | 0.3  | 9.81  | 7.49  | 7.45 | 7.97 | 6.65  | 8.6   |
| 2.29 | 5.88 | 2.29 | 8.06  | 7.73  | 7.53 | 8.11 | 6.1   | 7.28  |
| 3.8  | 6.56 | 0    | 9.12  | 7.34  | 8.22 | 7.8  | 7.18  | 8.51  |
| 6.93 | 4.3  | 7.16 | 10.67 | 6.39  | 6.97 | 7.47 | 7.29  | 7.63  |
| 7.64 | 4.65 | 5.87 | 10.63 | 6.95  | 6.56 | 7.31 | 6.77  | 7.98  |
| 8.06 | 4.99 | 5.46 | 10.48 | 6.74  | 6.69 | 7.35 | 6.79  | 8.28  |

<https://mc.manuscriptcentral.com/gut>

1  
2  
3  
4  
5  
6  
7  
8  
9  
10  
11  
12  
13  
14  
15  
16  
17  
18  
19  
20  
21  
22  
23  
24  
25  
26  
27  
28  
29  
30  
31  
32  
33  
34  
35  
36  
37  
38  
39  
40  
41  
42  
43  
44  
45  
46  
47  
48  
49  
50  
51  
52  
53  
54  
55  
56  
57  
58  
59  
60

|      |      |      |       |      |      |      |       |       |
|------|------|------|-------|------|------|------|-------|-------|
| 7.74 | 4.79 | 5.73 | 10.41 | 6.64 | 6.73 | 7.63 | 7     | 8.04  |
| 9.08 | 4.42 | 4.91 | 12.28 | 7.07 | 7.31 | 9.03 | 7.55  | 7.88  |
| 9.17 | 4.24 | 5.88 | 12.04 | 7.02 | 7    | 8.53 | 7.62  | 8.34  |
| 8.43 | 4.74 | 4.99 | 12.06 | 6.91 | 6.55 | 8.68 | 6.7   | 7.66  |
| 8.31 | 4    | 4.54 | 12.07 | 6.76 | 6.61 | 8.52 | 6.58  | 7.38  |
| 8.5  | 5.79 | 5.91 | 11.73 | 7.02 | 8.4  | 8.61 | 8.05  | 8.48  |
| 9.08 | 4.3  | 5.3  | 12.85 | 7.03 | 7.13 | 8.53 | 8.82  | 9.35  |
| 8.97 | 4.37 | 5.76 | 12.53 | 6.8  | 7.26 | 8.02 | 8.11  | 8.63  |
| 9.26 | 4.91 | 5.13 | 12.4  | 7.22 | 7.96 | 9.13 | 9.79  | 9.57  |
| 8.75 | 3.09 | 6.05 | 12.93 | 7.74 | 6.6  | 7.44 | 8.54  | 9.4   |
| 9.17 | 3.87 | 6.05 | 12.38 | 7.43 | 7.05 | 7.59 | 8.31  | 9.01  |
| 9.14 | 4.38 | 6.65 | 12.23 | 7.59 | 6.71 | 7.79 | 8.09  | 9.09  |
| 8.88 | 3.52 | 6.44 | 12.86 | 7.61 | 6.17 | 6.86 | 8.44  | 9.06  |
| 8.05 | 4.06 | 4.34 | 11.72 | 6.84 | 7.17 | 7.88 | 7.2   | 8.01  |
| 8.81 | 1.83 | 5.29 | 12.47 | 6.7  | 5.87 | 7.35 | 7.59  | 8.33  |
| 8.49 | 3.95 | 4.39 | 11.72 | 7.08 | 6.77 | 7.76 | 8.6   | 8.86  |
| 9.51 | 4.17 | 4.52 | 10.86 | 7.03 | 8.41 | 8.81 | 8.08  | 7.72  |
| 8.82 | 0.67 | 5.75 | 11.46 | 6.47 | 6.28 | 7.09 | 7.88  | 8.84  |
| 9.22 | 2.52 | 4.84 | 11.19 | 7.03 | 7.23 | 7.44 | 8.44  | 8.51  |
| 8.47 | 3.63 | 5.25 | 11.36 | 6.76 | 7.36 | 7.44 | 8.28  | 8.34  |
| 8.07 | 2.54 | 6.35 | 11.95 | 6.08 | 5.81 | 5.19 | 8.43  | 8.97  |
| 7.34 | 3.29 | 5.63 | 11.51 | 6.43 | 3.94 | 4.8  | 9.04  | 9.2   |
| 8.7  | 4.11 | 4.81 | 11.09 | 6.78 | 6.72 | 8.74 | 7.28  | 7.87  |
| 8.36 | 4.1  | 4.1  | 11.66 | 6.76 | 6.68 | 8.29 | 7.39  | 7.81  |
| 8.01 | 4.74 | 4.74 | 13.12 | 8.1  | 7.06 | 8.01 | 10.06 | 10.01 |
| 8.38 | 0.36 | 4.06 | 10.68 | 5.65 | 7.51 | 7.85 | 7.69  | 8.42  |
| 9.1  | 4.38 | 3.79 | 10.4  | 5.7  | 6.25 | 7.64 | 6.98  | 7.94  |
| 8.06 | 3.22 | 4.81 | 11.06 | 5.44 | 5.65 | 6.03 | 7.5   | 8.8   |
| 9.56 | 1.9  | 4.9  | 9.59  | 5.81 | 6.36 | 7.68 | 7.36  | 8.44  |
| 1.76 | 5.66 | 1.76 | 7.64  | 5.85 | 6.76 | 7.49 | 5.46  | 7.04  |
| 4.04 | 4.72 | 4.42 | 9.07  | 6.27 | 6.81 | 7.2  | 5.97  | 7.46  |
| 0.88 | 6.05 | 1.88 | 7.78  | 6.5  | 6.77 | 7.29 | 6.21  | 7.38  |
| 0.96 | 5.76 | 2.96 | 8.36  | 6.35 | 6.81 | 7.22 | 5.2   | 7.37  |
| 6.52 | 3.75 | 3.53 | 10.03 | 5.51 | 6.4  | 6.93 | 6.13  | 6.64  |
| 6.88 | 4.61 | 4.12 | 9.48  | 5.71 | 6.12 | 7.11 | 6.42  | 6.85  |
| 7.34 | 4.85 | 4.16 | 9.28  | 5.85 | 6.23 | 6.74 | 6.51  | 6.64  |
| 7.33 | 4.07 | 3.92 | 9.53  | 5.56 | 6.38 | 6.74 | 6.67  | 7.1   |
| 9.04 | 1.35 | 3.16 | 11.06 | 7    | 9.54 | 9.58 | 8.52  | 7.16  |
| 8.51 | 2.46 | 5.05 | 12.04 | 6.37 | 6.63 | 7.32 | 7.67  | 8.36  |
| 8.93 | 3    | 4.74 | 12.09 | 6.86 | 6.7  | 8.3  | 8.39  | 8.7   |
| 7.63 | 4.82 | 2.23 | 13.49 | 7.32 | 6.69 | 9.19 | 10.13 | 10.75 |
| 7.7  | 3.55 | 5.26 | 11.08 | 6.39 | 6.94 | 7.51 | 7.06  | 7.58  |
| 8.51 | 6.1  | 4.51 | 12.85 | 7.32 | 6.1  | 9.15 | 9.15  | 10.95 |
| 8.88 | 2.68 | 5.04 | 11.35 | 6.02 | 6.54 | 7.6  | 7.46  | 7.98  |
| 8.27 | 0    | 5.43 | 11.18 | 6.36 | 6.31 | 6.84 | 7.63  | 8.24  |
| 6.49 | 4.14 | 7.48 | 13.09 | 6.21 | 4.77 | 3.68 | 7.33  | 9.03  |
| 7.91 | 4.79 | 6.27 | 12.69 | 6.15 | 6.88 | 7.51 | 8.04  | 8.62  |
| 7.95 | 3.28 | 5.98 | 12.65 | 6    | 6.23 | 6.95 | 7.96  | 8.43  |
| 7.6  | 3.96 | 5.84 | 11.95 | 6.41 | 6.91 | 7.34 | 7.63  | 8.07  |
| 8    | 2.38 | 4.03 | 11.3  | 5.82 | 6.95 | 7.37 | 7.32  | 7.13  |
| 8.16 | 2.85 | 4.34 | 10.5  | 5.57 | 5.99 | 6.66 | 6.59  | 6.95  |
| 7.91 | 2.83 | 3    | 10.39 | 5.72 | 5.51 | 6.9  | 7.11  | 6.95  |

<https://mc.manuscriptcentral.com/gut>

1  
2  
3  
4  
5  
6  
7  
8  
9  
10  
11  
12  
13  
14  
15  
16  
17  
18  
19  
20  
21  
22  
23  
24  
25  
26  
27  
28  
29  
30  
31  
32  
33  
34  
35  
36  
37  
38  
39  
40  
41  
42  
43  
44  
45  
46  
47  
48  
49  
50  
51  
52  
53  
54  
55  
56  
57  
58  
59  
60

|      |      |      |       |      |      |      |      |       |
|------|------|------|-------|------|------|------|------|-------|
| 7.76 | 1.79 | 4.11 | 11.24 | 6.11 | 5.83 | 6.31 | 8.13 | 7.89  |
| 7.17 | 4.1  | 3.1  | 11.27 | 4.91 | 6.01 | 6.01 | 6.85 | 9.83  |
| 6.63 | 3.76 | 4.05 | 11.45 | 4.39 | 4.67 | 5.59 | 6.96 | 9.17  |
| 6.74 | 3.29 | 3.95 | 11.48 | 4.07 | 4.39 | 5.19 | 7.12 | 9.31  |
| 3.55 | 5.25 | 1.55 | 11.09 | 5.64 | 5.8  | 7.28 | 7.08 | 9.5   |
| 8.39 | 2.73 | 6.21 | 12.13 | 5.79 | 5.73 | 7.18 | 7.26 | 8.21  |
| 6.8  | 2.39 | 6    | 11.82 | 5.3  | 5.33 | 6.22 | 7.02 | 8.15  |
| 6.6  | 1.94 | 6.02 | 11.92 | 5.05 | 5.26 | 5.98 | 7.15 | 8.32  |
| 1.86 | 5.13 | 0.27 | 7.35  | 6.65 | 6.86 | 8.24 | 5.89 | 7.51  |
| 6.85 | 4.32 | 4.13 | 9.45  | 6.35 | 6.81 | 7.68 | 7.06 | 7.56  |
| 8.28 | 3.56 | 3.65 | 10.88 | 6.54 | 7.42 | 8.14 | 8.17 | 7.82  |
| 8.22 | 3.7  | 4.06 | 10.56 | 6.14 | 6.47 | 7.62 | 7.59 | 7.58  |
| 8.48 | 3.3  | 5.21 | 11.07 | 6.49 | 6.43 | 7.78 | 8.5  | 8.35  |
| 8.79 | 3.45 | 4.21 | 10.33 | 6.65 | 6.73 | 7.38 | 8.68 | 7.94  |
| 5.71 | 4.54 | 3.54 | 14.2  | 5.35 | 4.87 | 7.5  | 9    | 12.13 |
| 8.19 | 3.8  | 6.09 | 11.17 | 5.97 | 6.18 | 7.43 | 7.54 | 8.32  |
| 8.33 | 4.59 | 4.52 | 10.32 | 5.69 | 6.35 | 7.52 | 6.79 | 7.4   |
| 8.22 | 3.34 | 6.43 | 11.45 | 6.18 | 6.47 | 7.55 | 7.81 | 8.63  |

1  
2  
3  
4  
5  
6  
7  
8  
9  
10  
11  
12  
13  
14  
15  
16  
17  
18  
19  
20  
21  
22  
23  
24  
25  
26  
27  
28  
29  
30  
31  
32  
33  
34  
35  
36  
37  
38  
39  
40  
41  
42  
43  
44  
45  
46  
47  
48  
49  
50  
51  
52  
53  
54  
55  
56  
57  
58  
59  
60

| PIK3R5 | PIK3R6 | PITX2 | PKM   | PKN1  | PKNOX1 | PLA2G10 | PLA2G2A | PLA2G2D |
|--------|--------|-------|-------|-------|--------|---------|---------|---------|
| 7.11   | 7.25   | 7.73  | 9.04  | 7.83  | 6.77   | 7.67    | 7.42    | 6.74    |
| 6.52   | 6.21   | 6.48  | 10.31 | 7.94  | 6.54   | 8.49    | 7.85    | 4.88    |
| 6.59   | 6.64   | 6.93  | 10.42 | 7.73  | 6.37   | 7.97    | 8.59    | 4.67    |
| 6.64   | 5.09   | 4.43  | 10.62 | 8.98  | 4.82   | 8.35    | 9.54    | 3.35    |
| 7.78   | 8.26   | 8.33  | 8.98  | 3.82  | 9      | 7.4     | 9.72    | 6.68    |
| 6.5    | 6.09   | 6.47  | 10.34 | 8.11  | 6.6    | 7.97    | 9.71    | 5.68    |
| 7.08   | 6.19   | 6.65  | 10.34 | 8.28  | 6.22   | 8.53    | 9.1     | 5.8     |
| 6.77   | 5.75   | 1.39  | 11.51 | 9.6   | 5.25   | 8.8     | 9.81    | 6.48    |
| 7.54   | 5.86   | 4.54  | 10.67 | 8.62  | 6.74   | 9.48    | 7.19    | 6.04    |
| 5.77   | 6.1    | 6.58  | 10.71 | 7.03  | 6.6    | 8.48    | 6.83    | 5.04    |
| 6.38   | 4.29   | 3.55  | 10.99 | 7.54  | 5.38   | 8.78    | 5.77    | 4.29    |
| 6.61   | 4.59   | 2.68  | 11.28 | 8.02  | 5.27   | 8.44    | 9.4     | 4.93    |
| 6.38   | 6.5    | 6.59  | 9.67  | 7.58  | 6.27   | 6.47    | 12.06   | 4.39    |
| 6.79   | 6.58   | 6.87  | 10.26 | 7.96  | 6.65   | 6.24    | 11.27   | 5.7     |
| 7.13   | 7.13   | 1.77  | 11.28 | 10.02 | 6.35   | 5.77    | 11.75   | 9.19    |
| 7.32   | 7.19   | 7.66  | 10.6  | 8.79  | 7.13   | 7.37    | 7.53    | 6.94    |
| 6.81   | 7.02   | 7.61  | 10.9  | 8.45  | 6.93   | 8.02    | 7.44    | 6.46    |
| 7.07   | 6.93   | 7.88  | 11.22 | 8.77  | 7.46   | 6.69    | 8.95    | 5.81    |
| 7.98   | 6.98   | 3.9   | 10.35 | 9.64  | 4.98   | 6.13    | 8.14    | 7.67    |
| 7.17   | 5.37   | 2.48  | 10.55 | 9.12  | 5.06   | 7.17    | 8.72    | 6.15    |
| 7.84   | 6.28   | 3.75  | 10.41 | 9.35  | 5.14   | 3.2     | 7.14    | 8.38    |
| 6.36   | 5.1    | 5.32  | 10.83 | 8.99  | 5.73   | 8.31    | 6.51    | 2.47    |
| 6.57   | 4.78   | 4.29  | 10.94 | 9.11  | 5.24   | 8.46    | 4.52    | 2.2     |
| 6.64   | 4.65   | 4.06  | 10.66 | 9.26  | 5.18   | 8.25    | 6.9     | 3.22    |
| 7.4    | 4.43   | 4.01  | 10.87 | 8.56  | 4.43   | 3.75    | 6.85    | 6.53    |
| 5.62   | 3.45   | 3.13  | 11.66 | 8.86  | 4.71   | 9.46    | 10.57   | 3.45    |
| 5.11   | 3.69   | 3.52  | 11.4  | 8.9   | 4.43   | 9.49    | 9.87    | 2.52    |
| 6.66   | 6.56   | 6.68  | 10.54 | 8.36  | 6.18   | 8.8     | 9.24    | 5.37    |
| 6.5    | 6.69   | 6.94  | 10.45 | 7.38  | 6.45   | 6.75    | 6.96    | 6.43    |
| 6.87   | 7.26   | 7.49  | 10.3  | 7.28  | 6.84   | 7.47    | 7.49    | 5.92    |
| 6.35   | 6.94   | 7.03  | 10.57 | 7.79  | 6.39   | 7.99    | 6.84    | 4.78    |
| 6.94   | 7.71   | 7.76  | 10.32 | 7.63  | 7.34   | 7.7     | 7.54    | 5.66    |
| 8.03   | 7.3    | 7.81  | 9.16  | 7.99  | 7.24   | 5.2     | 7.86    | 8.83    |
| 6.75   | 5.61   | 4.15  | 10.48 | 9.05  | 6.01   | 7.95    | 11      | 4.58    |
| 6.63   | 5.23   | 5.07  | 10.65 | 8.76  | 5.84   | 8.44    | 10.69   | 4.13    |
| 6.11   | 5.42   | 3.06  | 10.44 | 9.13  | 5.86   | 8.23    | 10.71   | 4.56    |
| 7.69   | 5.65   | 2.45  | 11.14 | 9.09  | 4.97   | 2.45    | 7.34    | 8.25    |
| 7.74   | 5.05   | 3.57  | 11.14 | 8.51  | 4.86   | 6.95    | 11.39   | 5.16    |
| 7.86   | 5.41   | 4.95  | 11.36 | 8.52  | 5.01   | 2.37    | 9.64    | 6.72    |
| 7.94   | 5.17   | 3.07  | 10.5  | 8.74  | 4.79   | 4.2     | 11.02   | 7.54    |
| 6.52   | 6.62   | 6.71  | 9.37  | 6.63  | 6.38   | 8.09    | 8.56    | 5.94    |
| 6.13   | 6.27   | 6.72  | 9.57  | 6.15  | 6.15   | 8.12    | 8.63    | 5.25    |
| 6.2    | 6.15   | 6.37  | 9     | 6.2   | 5.68   | 7.68    | 7.67    | 5.47    |
| 6      | 5.31   | 5.67  | 9.51  | 6.5   | 5.4    | 8.52    | 8.23    | 4.72    |
| 5.86   | 5.45   | 5.45  | 10.8  | 10.13 | 5.18   | 3.86    | 10.04   | 5.18    |
| 6.12   | 4.31   | 5.02  | 9.71  | 8.55  | 4.71   | 8       | 5.77    | 3.9     |
| 5.95   | 3.17   | 2.32  | 10.04 | 8.47  | 3.81   | 7.97    | 7.11    | 3.32    |
| 5.98   | 3.13   | 3.9   | 9.7   | 8.44  | 2.81   | 7.39    | 6.3     | 4.13    |
| 7.17   | 5.59   | 3.22  | 11.12 | 9.15  | 5.16   | 5.63    | 7.98    | 6.16    |
| 7.19   | 4.1    | 3.71  | 11.33 | 9.04  | 4.82   | 5.74    | 5.68    | 3.71    |
| 7.25   | 4.67   | 3.67  | 11.1  | 9.56  | 5.08   | 5.54    | 4.89    | 3.3     |

<https://mc.manuscriptcentral.com/gut>

|    |      |       |       |       |      |       |      |       |      |
|----|------|-------|-------|-------|------|-------|------|-------|------|
| 1  |      |       |       |       |      |       |      |       |      |
| 2  | 7.5  | 4.72  | 3.4   | 11.42 | 9.39 | 4.54  | 5.63 | 7.04  | 4.6  |
| 3  | 5.84 | 6.79  | 7.05  | 10.86 | 7.41 | 7.18  | 6.08 | 8.61  | 5.55 |
| 4  | 5.77 | 6.62  | 7.32  | 10.91 | 7.56 | 6.96  | 5.36 | 8.03  | 4.65 |
| 5  | 5.76 | 6.38  | 6.82  | 11.06 | 7.54 | 6.4   | 6.04 | 10.52 | 4.54 |
| 6  | 6.16 | 6.81  | 7.37  | 10.72 | 7.43 | 6.58  | 5.39 | 8.66  | 5.22 |
| 7  | 7.45 | 5.66  | 5.87  | 10.57 | 8.87 | 5.27  | 9.44 | 6.32  | 6.48 |
| 8  | 6.18 | 4.83  | 4.77  | 11.26 | 9.66 | 4.83  | 9.68 | 10.18 | 2.83 |
| 9  | 4.36 | 4.09  | 4.43  | 11.28 | 9.55 | 4.73  | 10.1 | 6.32  | 2.17 |
| 10 | 6.35 | 4.14  | 3.02  | 11.48 | 9.82 | 5.08  | 9.62 | 9.21  | 3.61 |
| 11 | 6.88 | 3.83  | 4.11  | 11.7  | 9.09 | 3.97  | 5.17 | 8.07  | 5.07 |
| 12 | 7.07 | 4.35  | 4.24  | 11.02 | 8.45 | 4.13  | 7.82 | 5.07  | 5.79 |
| 13 | 6.34 | 2.62  | 4.52  | 11.08 | 8.61 | 4.57  | 5.94 | 4.06  | 4.4  |
| 14 | 6.84 | 3.3   | 3.44  | 10.93 | 8.87 | 3.3   | 6.11 | 6.99  | 5.19 |
| 15 | 9.15 | 11.66 | 10.93 | 9.15  | 7.96 | 14.07 | 5.15 | 14.7  | 5.15 |
| 16 | 7.65 | 8.14  | 8.69  | 11.47 | 8.12 | 9.75  | 6.18 | 11.19 | 6.81 |
| 17 | 7.7  | 7.47  | 7.79  | 10.91 | 7.63 | 8.23  | 6.56 | 10.26 | 6.35 |
| 18 | 9.41 | 9.44  | 10.26 | 9.19  | 1.83 | 10.94 | 7.64 | 11.45 | 8.19 |
| 19 | 9.04 | 9.67  | 10.4  | 9.18  | 5.86 | 10.44 | 7.66 | 10.78 | 7.81 |
| 20 | 5.87 | 6.71  | 6.72  | 11.68 | 7.91 | 6.31  | 5.72 | 11.76 | 4.46 |
| 21 | 5.85 | 6.48  | 6.63  | 11.74 | 7.65 | 6.27  | 5.67 | 11.68 | 4.55 |
| 22 | 6.3  | 6.84  | 7.39  | 11.34 | 7.57 | 6.81  | 6.45 | 11.55 | 6.1  |
| 23 | 5.98 | 4.27  | 1.9   | 10.98 | 9.11 | 4.68  | 7.85 | 7.69  | 3.27 |
| 24 | 6.19 | 5.64  | 5.77  | 10.64 | 8.88 | 5.32  | 8.2  | 8.23  | 3.98 |
| 25 | 6.63 | 6.54  | 6.33  | 10.01 | 7.93 | 6.54  | 7.78 | 8.05  | 4.96 |
| 26 | 7.8  | 5.92  | 5.96  | 11.51 | 9.1  | 6.03  | 8.93 | 6.03  | 6.47 |
| 27 | 7.1  | 5.21  | 6.17  | 11.87 | 8.98 | 6.19  | 8.62 | 5.33  | 4.95 |
| 28 | 6.62 | 4.39  | 5.21  | 11.95 | 9.02 | 5.73  | 7.78 | 6.96  | 3.86 |
| 29 | 6.68 | 6.45  | 6.42  | 10.19 | 8.3  | 6.36  | 6.8  | 7.53  | 5.68 |
| 30 | 6.71 | 6.05  | 6.39  | 10.34 | 8.41 | 6.55  | 5.84 | 6.96  | 5.19 |
| 31 | 6.99 | 6.24  | 6.63  | 10.12 | 8.2  | 6.75  | 5.83 | 8.33  | 6.08 |
| 32 | 6.98 | 7.11  | 7.27  | 10.72 | 7.1  | 6.54  | 7.16 | 9.39  | 5.54 |
| 33 | 6.77 | 7.29  | 7.32  | 10.92 | 7.46 | 6.54  | 7.53 | 8.16  | 5.45 |
| 34 | 6.8  | 7.44  | 7.41  | 10.87 | 7.09 | 6.92  | 7.26 | 7.43  | 5.45 |
| 35 | 6.83 | 6.42  | 7.08  | 10.25 | 8.6  | 6.25  | 7.77 | 7.21  | 5.46 |
| 36 | 7.09 | 6.77  | 7.21  | 10.43 | 8.53 | 6.76  | 8.6  | 7.1   | 5.01 |
| 37 | 7.1  | 6.68  | 7.27  | 10.58 | 8.59 | 6.77  | 7.45 | 8.63  | 4.88 |
| 38 | 7.38 | 7.16  | 7.47  | 9.79  | 7.65 | 7.3   | 6.91 | 8.45  | 6.68 |
| 39 | 7.38 | 7.16  | 7.47  | 9.79  | 7.65 | 7.3   | 6.91 | 8.45  | 6.68 |
| 40 | 6.92 | 6.72  | 7.18  | 10.31 | 8.01 | 7.23  | 7.72 | 7.66  | 5.54 |
| 41 | 7.23 | 7.14  | 7.14  | 10.2  | 7.8  | 6.96  | 8.01 | 8.92  | 5.91 |
| 42 | 7.03 | 6.79  | 6.92  | 10.19 | 8.11 | 7.41  | 7.62 | 8.4   | 5.64 |
| 43 | 7.7  | 7.35  | 7.46  | 9.71  | 7.64 | 7.53  | 6.91 | 7.88  | 6.76 |
| 44 | 7.78 | 7.36  | 7.04  | 10.41 | 8.12 | 7     | 6.3  | 9.3   | 5.11 |
| 45 | 7.34 | 6.77  | 6.65  | 10.7  | 8.07 | 6.62  | 7.42 | 8.73  | 5.04 |
| 46 | 7.7  | 6.97  | 7.09  | 10.02 | 7.95 | 7.6   | 7.3  | 9.17  | 6.34 |
| 47 | 5.66 | 4.19  | 3.19  | 11.05 | 8.29 | 5.59  | 8.96 | 5.34  | 5.05 |
| 48 | 4.72 | 4.08  | 3.66  | 11.36 | 7.62 | 4.98  | 9.45 | 7.82  | 2.08 |
| 49 | 7.4  | 5.98  | 3.69  | 11.38 | 8.81 | 5.8   | 8.86 | 5.91  | 6.47 |
| 50 | 7.39 | 7.07  | 7.05  | 9.63  | 6.97 | 6.8   | 7.09 | 8.78  | 6.58 |
| 51 | 6.96 | 7.13  | 7.15  | 9.79  | 7.93 | 6.67  | 7.39 | 8.86  | 5.34 |
| 52 | 6.95 | 6.83  | 6.54  | 9.75  | 8.01 | 6.56  | 7.55 | 8.24  | 5.41 |
| 53 | 6.63 | 6.44  | 6.15  | 9.65  | 7.12 | 7.12  | 7.96 | 7.9   | 5.4  |

<https://mc.manuscriptcentral.com/gut>

1  
2  
3  
4  
5  
6  
7  
8  
9  
10  
11  
12  
13  
14  
15  
16  
17  
18  
19  
20  
21  
22  
23  
24  
25  
26  
27  
28  
29  
30  
31  
32  
33  
34  
35  
36  
37  
38  
39  
40  
41  
42  
43  
44  
45  
46  
47  
48  
49  
50  
51  
52  
53  
54  
55  
56  
57  
58  
59  
60

|      |       |       |       |       |       |      |       |      |
|------|-------|-------|-------|-------|-------|------|-------|------|
| 6.6  | 5.95  | 5.8   | 10.1  | 7.51  | 6.63  | 7.85 | 7.55  | 5.06 |
| 7.57 | 7.01  | 7.52  | 9.83  | 7.64  | 8     | 7.4  | 8.73  | 5.99 |
| 7.88 | 6.04  | 7.06  | 9.47  | 8.73  | 6.64  | 7.52 | 7.37  | 7.57 |
| 7.06 | 5.98  | 6.42  | 11.13 | 8.84  | 6.31  | 6.49 | 8.64  | 4.98 |
| 7.48 | 5.85  | 5.62  | 10.67 | 9.29  | 6.51  | 6.83 | 10.63 | 4.3  |
| 7.56 | 6.19  | 4.93  | 10.71 | 8.9   | 5.58  | 6.73 | 8.41  | 6.91 |
| 6.07 | 3.87  | 3.64  | 11.38 | 7.48  | 4.83  | 7.99 | 5.68  | 3.13 |
| 5.93 | 4.66  | 4.4   | 11.5  | 7.66  | 4.61  | 8.06 | 6.52  | 0.76 |
| 7.14 | 7.92  | 6.82  | 12.24 | 10.01 | 6.4   | 8.02 | 9.2   | 5.66 |
| 6.84 | 5.55  | 4.25  | 10.34 | 8.99  | 3.96  | 7.18 | 4.11  | 6.9  |
| 5.66 | 3.08  | 5.19  | 10.71 | 8.42  | 3.3   | 7.77 | 5.08  | 4.08 |
| 6.45 | 6.08  | 6.4   | 10.06 | 7.24  | 5.41  | 7.1  | 6.46  | 5.06 |
| 6.78 | 6.43  | 7.82  | 11.47 | 10.03 | 5.85  | 7.58 | 7.35  | 5.43 |
| 7.68 | 8.18  | 8.4   | 9.08  | 2.01  | 9.18  | 8    | 8.41  | 6.46 |
| 4.41 | 4.12  | 4.75  | 10.79 | 8.09  | 5.73  | 7.03 | 11.32 | 3.53 |
| 3.92 | 2.16  | 0.83  | 10.89 | 7.77  | 4.36  | 6.9  | 11.6  | 2.42 |
| 4.81 | 3.69  | 4.22  | 10.74 | 8.23  | 5.16  | 7.21 | 11.23 | 3.77 |
| 7.03 | 4.52  | 2.43  | 11.81 | 8.53  | 4.93  | 6.5  | 8.69  | 6.63 |
| 6.95 | 6.47  | 6.94  | 11.38 | 8.22  | 6.91  | 4.98 | 7.23  | 6.45 |
| 7.31 | 6.07  | 6.33  | 11.54 | 8.4   | 6.64  | 2.98 | 7.66  | 7.54 |
| 6.75 | 10.12 | 10.16 | 10.02 | 10.29 | 9.62  | 6.75 | 9.16  | 5.16 |
| 5.69 | 3.38  | 4.49  | 11.02 | 7.89  | 4.56  | 8.48 | 4.66  | 4.83 |
| 6.56 | 5.12  | 4.12  | 10.65 | 8.15  | 5.18  | 8.37 | 6.99  | 6.64 |
| 5.93 | 5.5   | 1.18  | 10.77 | 9.57  | 4.99  | 7.48 | 5.64  | 3.99 |
| 5.95 | 5.95  | 3.23  | 10.74 | 9.92  | 5.49  | 7.79 | 5.91  | 4.91 |
| 6.88 | 5.07  | 3.54  | 10.39 | 9.34  | 5.07  | 7.3  | 6.32  | 5.07 |
| 7.88 | 8.08  | 8.75  | 8.96  | 4.32  | 8.08  | 7.55 | 8.2   | 6.49 |
| 7.53 | 8.52  | 8.79  | 8.74  | 3.86  | 8.29  | 7.47 | 8.3   | 6.61 |
| 7.44 | 7.67  | 7.88  | 8.48  | 3.77  | 8.05  | 6.85 | 8.35  | 6.23 |
| 5.89 | 3.33  | 0.01  | 8.85  | 7.54  | 2.82  | 7.82 | 7.95  | 5.37 |
| 5.55 | 4.18  | 0.59  | 9.15  | 8.24  | 3.68  | 6.93 | 8.3   | 2.18 |
| 5.02 | 4.2   | 1.11  | 9.73  | 8.61  | 3.69  | 7.67 | 7.5   | 0.11 |
| 6.18 | 3.33  | 0.16  | 8.95  | 8.21  | 3.16  | 6.24 | 9.54  | 3.33 |
| 7.05 | 7.7   | 8.03  | 7.98  | 4.7   | 7.31  | 6.77 | 8.06  | 6.64 |
| 6.73 | 6.78  | 6.92  | 8.75  | 3.57  | 6.64  | 6.69 | 7.32  | 5.25 |
| 6.37 | 6.94  | 7.35  | 9.03  | 4.3   | 6.83  | 7.25 | 7.06  | 5.27 |
| 8    | 7.91  | 8.52  | 8.15  | 0.91  | 8.7   | 6.79 | 9.21  | 6.39 |
| 7.19 | 7.36  | 7.68  | 8.18  | 2.92  | 7.04  | 6.42 | 7.62  | 6.09 |
| 7.03 | 7     | 7.25  | 8.15  | 2.1   | 6.62  | 6.88 | 7.8   | 5.68 |
| 6.91 | 6.77  | 7.19  | 8     | 2.63  | 6.67  | 6.54 | 7.59  | 5.63 |
| 7.97 | 8.03  | 9.69  | 7.27  | 3.41  | 11.37 | 3.41 | 12.2  | 5.58 |
| 7.68 | 8.25  | 8.62  | 9.02  | 4.23  | 8.27  | 7.67 | 8.51  | 6.61 |
| 8.07 | 8.58  | 8.67  | 9.08  | 2.5   | 8.73  | 7.81 | 8.8   | 6.82 |
| 6.73 | 7.75  | 8.18  | 10.47 | 6.33  | 7.76  | 6.82 | 7.65  | 6.19 |
| 7.58 | 8.14  | 8.25  | 9.24  | 4.07  | 8.12  | 7.29 | 8.54  | 6.54 |
| 6.94 | 7.25  | 7.55  | 9.56  | 6.76  | 7.53  | 7.4  | 8.02  | 6.58 |
| 7.46 | 7.7   | 8.07  | 9.17  | 4.75  | 8.15  | 7.66 | 8.47  | 6.56 |
| 7.54 | 7.13  | 7.15  | 8.94  | 1.71  | 7.93  | 7.68 | 8.41  | 6.46 |
| 8.16 | 7.91  | 8.84  | 9.17  | 2.22  | 8.84  | 7.34 | 9.49  | 6.95 |
| 6.1  | 5.3   | 5.43  | 9.46  | 7.23  | 5.96  | 5.96 | 12.77 | 5.56 |
| 6.49 | 5.07  | 4.95  | 9.78  | 8.2   | 5.99  | 5.97 | 12.52 | 4.95 |
| 6.48 | 6.12  | 6.59  | 9.75  | 8.24  | 6.19  | 5.87 | 12.5  | 5.59 |

<https://mc.manuscriptcentral.com/gut>

|    |      |      |      |       |       |      |      |       |      |
|----|------|------|------|-------|-------|------|------|-------|------|
| 1  |      |      |      |       |       |      |      |       |      |
| 2  | 7.1  | 6.22 | 6.34 | 9.58  | 7.77  | 6.36 | 5.88 | 11.43 | 6.08 |
| 3  | 6.56 | 6.76 | 6.87 | 11.56 | 8.37  | 6.56 | 8.12 | 10.71 | 5.69 |
| 4  | 7.06 | 6.86 | 7.3  | 11.41 | 8.37  | 6.93 | 8.87 | 9.11  | 5.24 |
| 5  | 6.36 | 6.5  | 7.01 | 11.06 | 7.56  | 6.41 | 8.14 | 9.92  | 4.65 |
| 6  | 6.17 | 6.58 | 6.69 | 11.34 | 7.89  | 6.17 | 8.37 | 10.77 | 5.06 |
| 7  | 7.63 | 7.05 | 7.21 | 10.83 | 8.79  | 7.43 | 7.22 | 8.44  | 6.78 |
| 8  | 7.2  | 6.4  | 5.65 | 11.76 | 8.86  | 6.09 | 7.66 | 9.76  | 5.6  |
| 9  | 6.93 | 5.53 | 5.23 | 11.49 | 8.45  | 5.62 | 7.13 | 9.12  | 4.93 |
| 10 | 7.85 | 6.99 | 5.95 | 10.84 | 9.67  | 6.76 | 6.65 | 10.1  | 6.52 |
| 11 | 7.22 | 6.46 | 6.85 | 12.13 | 9.6   | 5.93 | 9.51 | 5.62  | 4.09 |
| 12 | 7.32 | 6.45 | 7.24 | 10.9  | 9.05  | 5.97 | 9.3  | 8.66  | 5.07 |
| 13 | 7.23 | 6.61 | 7.26 | 10.93 | 8.96  | 6.06 | 9.03 | 6.74  | 5.34 |
| 14 | 6.51 | 6.17 | 6.87 | 11.21 | 9.11  | 5.62 | 9.25 | 8.43  | 4.39 |
| 15 | 6.88 | 6.56 | 6.02 | 10.41 | 7.64  | 6.18 | 8.38 | 7.11  | 5.45 |
| 16 | 6.53 | 4.9  | 2.68 | 10.87 | 8.01  | 5.34 | 8.63 | 8.59  | 2.97 |
| 17 | 7.11 | 6.68 | 5.67 | 10.28 | 8.78  | 6.54 | 7.43 | 9.72  | 4.6  |
| 18 | 7.27 | 5.7  | 3.17 | 9.88  | 8.83  | 4.95 | 6.44 | 9.04  | 7.05 |
| 19 | 6.47 | 4.47 | 2.67 | 10.63 | 8.22  | 4.57 | 8.07 | 9.22  | 3.47 |
| 20 | 7.01 | 5.65 | 2.84 | 10.32 | 8.92  | 5.1  | 7.62 | 9.34  | 4.1  |
| 21 | 6.75 | 3.63 | 4.39 | 10.53 | 8.45  | 4.25 | 8.6  | 9.19  | 5.97 |
| 22 | 5.24 | 3.63 | 4.54 | 10.81 | 8.89  | 4.75 | 4.71 | 5.94  | 0    |
| 23 | 3.87 | 3.18 | 3.73 | 10.44 | 9.1   | 4.76 | 5.59 | 3.94  | 1.48 |
| 24 | 6.86 | 6.66 | 7.11 | 10.77 | 8.29  | 6.75 | 7.17 | 6.63  | 4.81 |
| 25 | 6.51 | 6.63 | 7.04 | 11.13 | 8.57  | 6.71 | 6.63 | 5.97  | 5.68 |
| 26 | 6.85 | 7.32 | 7.91 | 11.41 | 10.17 | 8.88 | 7.74 | 9.4   | 5.47 |
| 27 | 6.74 | 4.45 | 1.95 | 9.01  | 7.54  | 4.27 | 1.95 | 9.74  | 8.01 |
| 28 | 5.84 | 5.49 | 5.38 | 8.83  | 7.46  | 5.92 | 6    | 10.57 | 5.92 |
| 29 | 5.12 | 3.85 | 4.57 | 9.17  | 7.49  | 5.44 | 3.93 | 10.75 | 4.57 |
| 30 | 3.48 | 1.9  | 1.9  | 9.57  | 8.07  | 5.71 | 3.48 | 9.78  | 3.9  |
| 31 | 6.57 | 7.37 | 7.34 | 8.58  | 3.34  | 6.4  | 6.46 | 7.71  | 5.76 |
| 32 | 6.36 | 6.7  | 6.83 | 9.19  | 4.72  | 6.79 | 6.63 | 9.69  | 5.63 |
| 33 | 6.91 | 7.15 | 7.13 | 8.32  | 3.88  | 7.29 | 6.67 | 7.54  | 5.93 |
| 34 | 6.81 | 7.09 | 7.31 | 8.7   | 2.96  | 6.81 | 6.31 | 7.64  | 5.91 |
| 35 | 6.15 | 5.77 | 6.03 | 9.33  | 6.39  | 5.43 | 7.68 | 6.28  | 5.77 |
| 36 | 6.07 | 6.35 | 6.68 | 8.61  | 6.58  | 5.95 | 6.73 | 6.3   | 4.91 |
| 37 | 6.29 | 6.29 | 6.32 | 8.68  | 6.41  | 5.55 | 6.55 | 6.56  | 4.9  |
| 38 | 6.36 | 6.29 | 6.27 | 8.93  | 6.97  | 5.74 | 6.13 | 6.68  | 4.75 |
| 39 | 7.66 | 5.48 | 3.94 | 9.75  | 9.3   | 4.16 | 0.35 | 6.91  | 9.35 |
| 40 | 5.92 | 6.22 | 6.82 | 9.78  | 8.44  | 6.16 | 7.46 | 7.48  | 5.05 |
| 41 | 6.72 | 5.59 | 2.74 | 11.39 | 8.65  | 4.67 | 7.25 | 10.22 | 6.35 |
| 42 | 7.32 | 7.96 | 4.55 | 11.99 | 10.38 | 5.82 | 4.82 | 10.67 | 8.32 |
| 43 | 6.24 | 6.53 | 6.91 | 10.82 | 8.07  | 7.28 | 8.12 | 6.88  | 5.76 |
| 44 | 6.51 | 7.83 | 7.32 | 11.67 | 10.18 | 6.1  | 5.51 | 11.48 | 8.1  |
| 45 | 6.04 | 4.04 | 3.04 | 11.11 | 8.83  | 5.62 | 8.57 | 5.98  | 3.68 |
| 46 | 5.77 | 4.18 | 1.94 | 10.88 | 9     | 4.84 | 9.17 | 6.39  | 3.39 |
| 47 | 3.85 | 3    | 3.27 | 10.84 | 8.51  | 3.68 | 2.27 | 13.46 | 0.68 |
| 48 | 6.61 | 5.94 | 6.55 | 10.71 | 8.74  | 6.17 | 3.98 | 13.49 | 6.96 |
| 49 | 5.6  | 4.36 | 3.98 | 10.76 | 8.84  | 4.18 | 3.74 | 14.12 | 5.6  |
| 50 | 6.39 | 6.5  | 6.73 | 10.38 | 8.36  | 6.23 | 4.96 | 13.56 | 6.63 |
| 51 | 6.79 | 4.82 | 3.48 | 9.79  | 7.97  | 5.06 | 4.93 | 7.47  | 2.57 |
| 52 | 6.28 | 5.53 | 6.36 | 9.12  | 7.62  | 6.17 | 5.05 | 6.57  | 2.85 |
| 53 | 6.29 | 5.77 | 6.72 | 8.97  | 7.29  | 6.4  | 4.64 | 6.69  | 4.42 |

## Gut

1  
2  
3  
4  
5  
6  
7  
8  
9  
10  
11  
12  
13  
14  
15  
16  
17  
18  
19  
20  
21  
22  
23  
24  
25  
26  
27  
28  
29  
30  
31  
32  
33  
34  
35  
36  
37  
38  
39  
40  
41  
42  
43  
44  
45  
46  
47  
48  
49  
50  
51  
52  
53  
54  
55  
56  
57  
58  
59  
60

|      |      |      |       |      |      |       |       |      |
|------|------|------|-------|------|------|-------|-------|------|
| 5.37 | 4.11 | 4.88 | 9.36  | 8.3  | 5.83 | 5.92  | 7.45  | 2.37 |
| 5.01 | 6.39 | 7.08 | 10.23 | 7.97 | 6.31 | 4.91  | 8.23  | 3.1  |
| 4.91 | 5.44 | 6.14 | 9.68  | 8.57 | 5.83 | 4.29  | 6.11  | 2.17 |
| 4.07 | 5.19 | 5.91 | 9.37  | 8.62 | 5.66 | 3.07  | 5.35  | 1.49 |
| 6.55 | 7.64 | 8.03 | 8.75  | 7.25 | 7.89 | 5.72  | 7.93  | 5.8  |
| 6.16 | 4.47 | 2.89 | 10.14 | 7.92 | 5.61 | 2.37  | 11.23 | 4.96 |
| 5.22 | 3.46 | 3.53 | 10.33 | 7.85 | 5.35 | 4.82  | 9.96  | 4.46 |
| 5.13 | 3.67 | 3.26 | 10.38 | 7.84 | 5.94 | 4.81  | 10.45 | 3.88 |
| 7.21 | 7.86 | 7.97 | 8.29  | 1.27 | 7.81 | 7.14  | 7.89  | 6.25 |
| 6.87 | 7.15 | 7.29 | 8.95  | 7.13 | 6.93 | 7.44  | 7.15  | 5.96 |
| 6.96 | 5.41 | 4.05 | 9.34  | 8.44 | 6.35 | 8.71  | 6.7   | 5.11 |
| 6.5  | 6.41 | 6.62 | 9.61  | 8.17 | 5.93 | 7.99  | 6.64  | 4.8  |
| 6.84 | 5.59 | 6.14 | 9.6   | 8.31 | 6.08 | 7.92  | 7.23  | 4.76 |
| 7.22 | 5.98 | 7.02 | 9.32  | 8.26 | 6.21 | 7.73  | 8.63  | 5.34 |
| 6.79 | 7.87 | 5.71 | 10.22 | 9.16 | 8.79 | 10.26 | 10.57 | 6.24 |
| 6.61 | 5.68 | 5.61 | 10.59 | 8.32 | 6.44 | 7.52  | 7.58  | 7.83 |
| 6.68 | 6.13 | 6.36 | 9.69  | 7.86 | 6.03 | 6.93  | 8.11  | 6.69 |
| 6.64 | 5.37 | 5.48 | 10.87 | 8.41 | 6.7  | 7.49  | 8.01  | 8.01 |



1  
2  
3  
4  
5  
6  
7  
8  
9  
10  
11  
12  
13  
14  
15  
16  
17  
18  
19  
20  
21  
22  
23  
24  
25  
26  
27  
28  
29  
30  
31  
32  
33  
34  
35  
36  
37  
38  
39  
40  
41  
42  
43  
44  
45  
46  
47  
48  
49  
50  
51  
52  
53  
54  
55  
56  
57  
58  
59  
60

| PLA2G3 | PLAU  | PLAUR | PLCG1 | PLCG2 | PLEKHO1 | PLS1 | PLXDC1 | PLXNC1 |
|--------|-------|-------|-------|-------|---------|------|--------|--------|
| 6.88   | 7.84  | 7.26  | 8.59  | 7.74  | 9.13    | 7.58 | 7.37   | 7.89   |
| 6.62   | 9.4   | 8.67  | 8.49  | 6.12  | 9.01    | 8.58 | 7.95   | 7.19   |
| 7.04   | 8.88  | 8.18  | 8.57  | 5.86  | 8.69    | 8.19 | 7.79   | 7.21   |
| 4.57   | 9.82  | 9.18  | 8.93  | 7.12  | 9.75    | 7.7  | 8.46   | 7.88   |
| 8.16   | 7.88  | 8.65  | 8.11  | 1.01  | 8.56    | 8.74 | 8.64   | 8.59   |
| 6.49   | 9.27  | 8.58  | 8.32  | 6     | 9.11    | 7.92 | 7.47   | 7.84   |
| 6.44   | 9.48  | 9.31  | 8.25  | 6.62  | 9.12    | 7.8  | 7.52   | 7.99   |
| 2.98   | 9.9   | 10.31 | 8.71  | 7.46  | 10.45   | 7.23 | 7.68   | 8.48   |
| 4.07   | 9.55  | 8.72  | 8.71  | 7.34  | 10      | 6.52 | 7.27   | 8.7    |
| 6.34   | 8.75  | 7.86  | 7.98  | 5.16  | 8.18    | 8.7  | 6.27   | 7.09   |
| 4.77   | 9.58  | 8.27  | 8.13  | 6.79  | 9.04    | 8.84 | 5.7    | 7.4    |
| 4.85   | 10.59 | 8.97  | 8.65  | 7.24  | 9.94    | 8.66 | 6.99   | 8.02   |
| 6.3    | 8.83  | 8.25  | 9.55  | 7.81  | 8.22    | 8.36 | 6.86   | 7.3    |
| 6.75   | 9.78  | 8.62  | 9.68  | 7.46  | 9       | 8.23 | 7.63   | 7.91   |
| 1.77   | 8.99  | 9.1   | 9.69  | 9.03  | 11.55   | 6.16 | 8.09   | 9.03   |
| 6.85   | 9.34  | 8.91  | 8.63  | 7.4   | 9.21    | 8.08 | 7.67   | 8.4    |
| 6.87   | 9.48  | 8.77  | 8.41  | 6.33  | 8.71    | 8.39 | 7.81   | 8      |
| 6.64   | 9.74  | 8.91  | 8.44  | 5.89  | 9.45    | 8.62 | 8.03   | 8.63   |
| 2.22   | 9.1   | 8.56  | 9.43  | 9.39  | 11.34   | 7.04 | 8.66   | 8.57   |
| 0      | 9.44  | 8.02  | 9.56  | 8.02  | 9.98    | 8.39 | 7.89   | 8.33   |
| 2.5    | 9.05  | 7.96  | 9.8   | 8.37  | 10.83   | 7.54 | 7.96   | 8.57   |
| 2.15   | 9.7   | 9.25  | 9.48  | 7.19  | 9.44    | 8.15 | 7.17   | 7.37   |
| 2.2    | 9.31  | 9.58  | 9.66  | 7.45  | 9.15    | 8.18 | 6.88   | 6.83   |
| 2.48   | 9.69  | 9.47  | 9.51  | 7.17  | 10.12   | 7.73 | 7.06   | 7.33   |
| 0.43   | 8.27  | 7.66  | 8.92  | 7.23  | 9.34    | 2.01 | 5.75   | 8.76   |
| 2.71   | 8.73  | 8.72  | 7.27  | 6.95  | 8.09    | 8.27 | 6.08   | 7.2    |
| 2.52   | 8.49  | 8.16  | 7.66  | 6.79  | 7.87    | 8.66 | 6.86   | 6.84   |
| 6.14   | 8.54  | 8.71  | 7.55  | 7.45  | 8.24    | 8.4  | 8.24   | 7.71   |
| 6.6    | 7.51  | 7.99  | 8.77  | 7.04  | 8.3     | 7.7  | 7.06   | 7.02   |
| 6.57   | 8.33  | 8.45  | 8.76  | 6.99  | 8.85    | 7.88 | 7.44   | 7.57   |
| 6.69   | 7.94  | 8.35  | 8.86  | 5.52  | 8.14    | 8.07 | 7.03   | 7.05   |
| 7.22   | 8.29  | 8.83  | 8.93  | 6.26  | 8.8     | 7.76 | 7.99   | 7.53   |
| 5.99   | 8.31  | 7.83  | 9.08  | 9.42  | 10.46   | 5.92 | 7.44   | 8.75   |
| 2.06   | 9.81  | 8.71  | 9.8   | 6.77  | 9.7     | 7.69 | 8.25   | 8.45   |
| 3.07   | 10.04 | 8.79  | 9.42  | 6.46  | 9.29    | 8.48 | 8.03   | 8.11   |
| 0.47   | 9.02  | 8.49  | 9.6   | 6.86  | 9.93    | 7.47 | 8.28   | 8.33   |
| 5.62   | 7.63  | 9.37  | 8.15  | 8.54  | 10.5    | 4.84 | 6.53   | 8.65   |
| 4.36   | 9.6   | 9.24  | 8.29  | 7.66  | 9.41    | 7.33 | 6.12   | 7.94   |
| 4.07   | 8.67  | 8.22  | 8.58  | 8.25  | 9.97    | 5.54 | 6.74   | 8.41   |
| 4.14   | 7.97  | 8.13  | 8.78  | 8.1   | 10.24   | 6.01 | 6.36   | 8.38   |
| 6.67   | 8.33  | 7.97  | 8.45  | 6.39  | 8.44    | 7.31 | 7.33   | 7.41   |
| 6.53   | 8.66  | 7.76  | 8.36  | 4.76  | 7.85    | 7.41 | 7.7    | 7.27   |
| 6.85   | 8.15  | 7.26  | 8.4   | 4.47  | 7.92    | 7.58 | 7.43   | 7.18   |
| 5.75   | 8.94  | 7.68  | 8.5   | 5.37  | 7.96    | 7.41 | 6.91   | 7.39   |
| 2.86   | 7.56  | 8.22  | 8.07  | 7.56  | 9.16    | 5.18 | 6.45   | 7.03   |
| 3.77   | 7.78  | 6.52  | 8.15  | 7.1   | 8.64    | 7.99 | 6.31   | 7.1    |
| 4.17   | 8.61  | 7.5   | 8.28  | 6.58  | 8.56    | 7.94 | 6.81   | 7.7    |
| 3.51   | 8.58  | 7.22  | 8.59  | 7     | 9.21    | 7.31 | 6.6    | 7.63   |
| 2.22   | 9.86  | 9.43  | 9.7   | 8.44  | 10.24   | 9.3  | 7.03   | 8.81   |
| 3.18   | 10.37 | 9.99  | 9.39  | 7.69  | 9.82    | 9.16 | 6.64   | 8.18   |
| 2.5    | 9.04  | 9.3   | 9.17  | 7.71  | 9.7     | 9.18 | 6.52   | 7.71   |

<https://mc.manuscriptcentral.com/gut>

|    |      |       |       |       |      |       |      |       |      |
|----|------|-------|-------|-------|------|-------|------|-------|------|
| 1  |      |       |       |       |      |       |      |       |      |
| 2  | 1.66 | 9.94  | 9.64  | 9.41  | 7.63 | 10.25 | 8.68 | 6.85  | 8.63 |
| 3  | 5.46 | 7.89  | 8.6   | 9.58  | 6.93 | 8.37  | 7.93 | 6.72  | 7.13 |
| 4  | 6.26 | 9.65  | 8.52  | 9.54  | 6.4  | 8.61  | 7.74 | 7.41  | 7.08 |
| 5  | 5.74 | 9.91  | 8.14  | 9.38  | 6.72 | 8.42  | 7.96 | 6.79  | 6.88 |
| 6  | 6.29 | 8.53  | 8.27  | 9.41  | 6.63 | 9.02  | 7.67 | 6.91  | 7.32 |
| 7  | 4.04 | 7.61  | 7.6   | 9.2   | 8.21 | 9.56  | 9.48 | 7.4   | 7.7  |
| 8  | 0.25 | 9.72  | 8.75  | 9.23  | 6.2  | 8.74  | 9.69 | 7.42  | 7.19 |
| 9  | 1.59 | 8.23  | 8.14  | 9.24  | 5.21 | 7.69  | 10.3 | 6.88  | 5.99 |
| 10 | 2.76 | 8.54  | 8.95  | 10.06 | 6.32 | 9.49  | 9.29 | 7.82  | 6.93 |
| 11 | 3.97 | 7.04  | 7.05  | 8.87  | 7.65 | 8.69  | 7.65 | 6.34  | 7.28 |
| 12 | 5.13 | 8.67  | 7.71  | 8.78  | 8.23 | 8.92  | 7.63 | 6.95  | 7.93 |
| 13 | 5.67 | 8.65  | 7.52  | 8.76  | 7.41 | 8.27  | 7.49 | 6.4   | 7.34 |
| 14 | 5.02 | 8.15  | 7.27  | 8.97  | 7.61 | 9.09  | 7.15 | 6.75  | 7.62 |
| 15 | 8.74 | 9.79  | 9.4   | 8.47  | 6.15 | 10.15 | 8.61 | 11.42 | 8.61 |
| 16 | 6.6  | 9.63  | 10.77 | 8.19  | 7.11 | 10.78 | 7.92 | 9.16  | 8.54 |
| 17 | 7.21 | 9.34  | 9.69  | 8.33  | 6.9  | 9.98  | 8.21 | 7.91  | 8.27 |
| 18 | 9.22 | 9.53  | 8.92  | 8.15  | 0.24 | 10.05 | 9.07 | 10.07 | 9.91 |
| 19 | 8.9  | 8.89  | 9.11  | 8.45  | 1.77 | 9.41  | 8.5  | 10.05 | 9.05 |
| 20 | 6.58 | 9.48  | 9.16  | 9.12  | 4.66 | 7.81  | 8.79 | 7.07  | 6.51 |
| 21 | 6.43 | 9.12  | 9.59  | 9.04  | 3.96 | 7.36  | 9.38 | 6.79  | 6.39 |
| 22 | 6.68 | 9.21  | 9.08  | 9.22  | 5.96 | 8.44  | 8.67 | 6.98  | 6.99 |
| 23 | 3.49 | 8.27  | 8.98  | 9.59  | 7.19 | 8.87  | 8.73 | 7.95  | 8.32 |
| 24 | 5.03 | 7.94  | 8.98  | 9.46  | 6.43 | 9.01  | 9    | 7.36  | 7.84 |
| 25 | 6.88 | 7.94  | 8.61  | 8.95  | 6.18 | 9.6   | 9.1  | 7.54  | 8.15 |
| 26 | 4.1  | 9.91  | 9.57  | 9.13  | 8.49 | 9.64  | 9.44 | 7.22  | 7.87 |
| 27 | 3.74 | 10.82 | 9.87  | 9.08  | 7.73 | 9.71  | 9.66 | 7.76  | 7.81 |
| 28 | 3.5  | 10.28 | 9.62  | 9.28  | 7.43 | 9.7   | 9.41 | 7.69  | 7.77 |
| 29 | 6.36 | 9.78  | 8.58  | 9.8   | 7.48 | 9.22  | 7.11 | 6.88  | 7.55 |
| 30 | 6.05 | 9.6   | 8.38  | 9.67  | 7.13 | 9.1   | 6.23 | 7.19  | 7.48 |
| 31 | 6.56 | 8.64  | 8.39  | 9.94  | 7.29 | 9.52  | 6.69 | 7.21  | 7.93 |
| 32 | 7.16 | 8.15  | 8.67  | 9.67  | 6.87 | 8.76  | 9.03 | 7.76  | 7.68 |
| 33 | 6.9  | 8.53  | 7.9   | 9.62  | 6.29 | 8.43  | 9.01 | 7.97  | 7.16 |
| 34 | 7.35 | 8.49  | 8.69  | 9.75  | 5.97 | 8.46  | 9.11 | 8.11  | 7.63 |
| 35 | 6.99 | 10.3  | 8.86  | 8.62  | 6.59 | 9.12  | 8.19 | 7.64  | 8.23 |
| 36 | 7.21 | 10.29 | 9.39  | 8.61  | 6.16 | 8.61  | 8.73 | 7.47  | 8.07 |
| 37 | 6.84 | 10.62 | 9.43  | 8.48  | 6.93 | 9.14  | 7.88 | 7.46  | 7.98 |
| 38 | 7.26 | 8.85  | 8.77  | 8.78  | 8.08 | 9.35  | 8.33 | 7.85  | 8.28 |
| 39 | 7.26 | 8.85  | 8.77  | 8.78  | 8.08 | 9.35  | 8.33 | 7.85  | 8.28 |
| 40 | 6.7  | 8.43  | 9.85  | 8.44  | 7.07 | 9.1   | 9.04 | 7.9   | 8.13 |
| 41 | 7.52 | 8.43  | 9.38  | 8.62  | 6.84 | 9.41  | 9.02 | 8.02  | 7.9  |
| 42 | 7.03 | 9.66  | 9.15  | 8.89  | 7.12 | 9.12  | 8.95 | 7.86  | 8.56 |
| 43 | 7.73 | 7.83  | 8.1   | 8.63  | 7.91 | 9.51  | 7.91 | 8.05  | 8.25 |
| 44 | 6.88 | 9.9   | 9.74  | 9.06  | 5.72 | 9.17  | 8.1  | 8.04  | 8.09 |
| 45 | 6.69 | 9.14  | 8.7   | 9.02  | 5.47 | 8.86  | 8.7  | 7.54  | 7.78 |
| 46 | 7.67 | 7.78  | 8.17  | 8.73  | 5.9  | 9.7   | 8.26 | 7.92  | 7.74 |
| 47 | 3.31 | 9.75  | 8.41  | 8.87  | 7.41 | 9.19  | 9.21 | 7.55  | 7.45 |
| 48 | 2.4  | 9.73  | 8.35  | 8.4   | 6.5  | 8.1   | 9.73 | 7     | 6.01 |
| 49 | 3.32 | 9.19  | 9.82  | 8.63  | 7.63 | 10.22 | 8.82 | 7.56  | 8.44 |
| 50 | 7.61 | 8.23  | 8.03  | 8.78  | 7.36 | 9.29  | 7.6  | 7.77  | 8.13 |
| 51 | 7.31 | 8.94  | 8.75  | 8.44  | 6.22 | 9.63  | 7.92 | 8.26  | 8.27 |
| 52 | 7.58 | 8.58  | 8.47  | 8.66  | 5.81 | 9.75  | 7.88 | 8.18  | 8.06 |
| 53 | 7.27 | 8.12  | 7.75  | 8.35  | 5.57 | 8.59  | 8.36 | 7.5   | 7.58 |

<https://mc.manuscriptcentral.com/gut>

|    |      |       |       |      |      |       |      |       |      |
|----|------|-------|-------|------|------|-------|------|-------|------|
| 1  |      |       |       |      |      |       |      |       |      |
| 2  | 6.93 | 8.93  | 8.22  | 8.38 | 5.28 | 8.76  | 8.36 | 7.55  | 7.7  |
| 3  | 7.79 | 8.48  | 8.73  | 7.72 | 4.36 | 9.62  | 8.45 | 8.34  | 8.38 |
| 4  | 4.1  | 8.13  | 7.82  | 9.24 | 8.73 | 10.35 | 7.56 | 7.61  | 8.04 |
| 5  | 4.25 | 10.08 | 8.52  | 8.92 | 7.3  | 9.46  | 8.4  | 8.15  | 8.57 |
| 6  | 2.08 | 9.72  | 8.41  | 9.26 | 7.15 | 9.99  | 8.46 | 8.67  | 9.55 |
| 7  | 0.41 | 8.86  | 9.27  | 8.58 | 8.76 | 10.32 | 7.98 | 7.87  | 8.75 |
| 8  | 4.8  | 9.98  | 9.39  | 8.31 | 6.26 | 8.74  | 9.01 | 6.47  | 7.53 |
| 9  | 4.28 | 9.96  | 9.38  | 8.17 | 6.15 | 9.14  | 9.12 | 6.97  | 7.77 |
| 10 | 5.66 | 9.47  | 11.47 | 7.92 | 7.49 | 11.61 | 6.74 | 8.38  | 8.62 |
| 11 | 1.79 | 7.91  | 8.76  | 8.76 | 7.93 | 9.92  | 7.81 | 7.13  | 8.05 |
| 12 | 2.49 | 8.87  | 8.48  | 8.94 | 6.62 | 8.72  | 8.37 | 6.98  | 7.16 |
| 13 | 6.96 | 7.99  | 8.2   | 8.47 | 5.1  | 7.97  | 8.41 | 7.14  | 6.86 |
| 14 | 4.26 | 9.75  | 10.76 | 8.8  | 7.3  | 11    | 6.35 | 8.3   | 8.53 |
| 15 | 8.93 | 8.39  | 9.77  | 9.36 | 1.2  | 8.92  | 8.94 | 8.76  | 8.75 |
| 16 | 5.85 | 9.59  | 8.6   | 8.83 | 6.17 | 7.91  | 7.67 | 6.3   | 6.3  |
| 17 | 5.59 | 9.68  | 8.59  | 9    | 6.12 | 7.85  | 8.04 | 6.14  | 5.9  |
| 18 | 5.79 | 8.5   | 8.83  | 9.02 | 6.34 | 8.16  | 7.96 | 6.39  | 6.44 |
| 19 | 2.02 | 10.72 | 9.22  | 9.17 | 7.63 | 9.7   | 8.66 | 7.41  | 7.86 |
| 20 | 5.26 | 10.06 | 8.79  | 8.72 | 6.17 | 9.37  | 7.28 | 7.43  | 8.12 |
| 21 | 4.4  | 10.69 | 9.42  | 8.78 | 6.73 | 10.07 | 7.45 | 7.45  | 8.41 |
| 22 | 6.75 | 6.16  | 10.62 | 7.97 | 6.16 | 11.75 | 6.16 | 9.07  | 8.49 |
| 23 | 0.13 | 9.52  | 8.98  | 8.24 | 6.08 | 8.14  | 9.55 | 6.78  | 6.78 |
| 24 | 2.54 | 9.2   | 8.57  | 8.44 | 7.74 | 9.18  | 8.89 | 6.56  | 7.83 |
| 25 | 1.18 | 8.35  | 8.64  | 8.7  | 6.31 | 9.39  | 5.93 | 8.06  | 7.31 |
| 26 | 1.91 | 8.68  | 8.82  | 8.84 | 6.74 | 9.99  | 6.26 | 8.84  | 7.81 |
| 27 | 2.13 | 8.88  | 8.55  | 9.15 | 7.61 | 9.84  | 5.63 | 8.35  | 7.98 |
| 28 | 8.07 | 7.84  | 8.12  | 8.43 | 2.58 | 8.61  | 8.17 | 8.08  | 8.23 |
| 29 | 8.48 | 7.78  | 7.97  | 8.28 | 0.86 | 8.06  | 8.37 | 8.21  | 7.92 |
| 30 | 8.16 | 7.35  | 7.77  | 8.07 | 3.77 | 7.88  | 8.41 | 7.96  | 8.16 |
| 31 | 1.01 | 7.87  | 7.33  | 8.17 | 6.74 | 8.6   | 7.36 | 6.01  | 7.48 |
| 32 | 0.59 | 8.77  | 8.13  | 8.18 | 5.29 | 9.53  | 6.18 | 6.98  | 7.28 |
| 33 | 2.92 | 8.44  | 8.07  | 8    | 6.11 | 9.29  | 6.78 | 6.58  | 7.52 |
| 34 | 0.16 | 8.37  | 8.6   | 8.46 | 6.24 | 9.31  | 5.4  | 6.92  | 7.25 |
| 35 | 7.46 | 7.05  | 7.9   | 7.27 | 3.77 | 7.95  | 7.05 | 7.58  | 7.64 |
| 36 | 7.33 | 7.08  | 7.99  | 7.82 | 0.25 | 6.94  | 7.55 | 7.25  | 7.16 |
| 37 | 7.12 | 6.87  | 7.79  | 7.65 | 2.51 | 7.16  | 7.66 | 6.94  | 6.94 |
| 38 | 7.78 | 7.86  | 7.59  | 7.23 | 0    | 8.17  | 8.13 | 8.53  | 7.93 |
| 39 | 7.91 | 6.58  | 7.06  | 7.12 | 3.92 | 7.34  | 7.29 | 7.51  | 7.58 |
| 40 | 7.51 | 6.65  | 7.25  | 7.49 | 2.1  | 7.29  | 7.27 | 7.36  | 7.16 |
| 41 | 7.48 | 6.8   | 7.3   | 7.28 | 1.31 | 7.45  | 7.12 | 7.39  | 7.6  |
| 42 | 7.05 | 8.54  | 6.22  | 6.22 | 2.41 | 9.15  | 7.62 | 10.22 | 8.32 |
| 43 | 8.33 | 7.58  | 8.31  | 8.49 | 3.38 | 8.58  | 7.81 | 8.12  | 8.26 |
| 44 | 8.69 | 7.93  | 9.23  | 8.87 | 1.33 | 8.17  | 8.49 | 8.44  | 8.49 |
| 45 | 7.54 | 8.05  | 10.78 | 8.17 | 4.87 | 8.47  | 7.73 | 7.65  | 7.36 |
| 46 | 8.04 | 7.88  | 9.37  | 8.27 | 2.56 | 8.28  | 7.92 | 8.15  | 8.14 |
| 47 | 7.7  | 7.65  | 7.9   | 7.82 | 6.19 | 8.83  | 7.83 | 8.41  | 7.98 |
| 48 | 8.51 | 7.89  | 8.34  | 8.12 | 0.3  | 8.63  | 8.62 | 9.7   | 8.22 |
| 49 | 8.76 | 7.68  | 8.31  | 8.22 | 0.71 | 8.65  | 8.65 | 9.51  | 8.56 |
| 50 | 8.19 | 8.32  | 7.99  | 7.71 | 2.48 | 9.26  | 8.78 | 9.58  | 8.58 |
| 51 | 6.43 | 7.83  | 6.65  | 8.34 | 6.16 | 8.21  | 8.23 | 6.51  | 7.35 |
| 52 | 6.36 | 8.67  | 6.96  | 8.18 | 6.25 | 8.43  | 8.48 | 6.63  | 7.34 |
| 53 | 6.39 | 8.53  | 7.45  | 8.19 | 5.97 | 8.45  | 8.59 | 7.15  | 7.58 |

<https://mc.manuscriptcentral.com/gut>

## Gut

Page 386 of 656

1  
2  
3  
4  
5  
6  
7  
8  
9  
10  
11  
12  
13  
14  
15  
16  
17  
18  
19  
20  
21  
22  
23  
24  
25  
26  
27  
28  
29  
30  
31  
32  
33  
34  
35  
36  
37  
38  
39  
40  
41  
42  
43  
44  
45  
46  
47  
48  
49  
50  
51  
52  
53  
54  
55  
56  
57  
58  
59  
60

|      |       |       |       |       |       |      |       |      |
|------|-------|-------|-------|-------|-------|------|-------|------|
| 6.97 | 8.21  | 7.08  | 8.14  | 6.54  | 8.51  | 8.76 | 7     | 7.53 |
| 6.42 | 8.78  | 8.46  | 8.87  | 7.98  | 9.22  | 8.37 | 7.64  | 8.07 |
| 6.9  | 9.14  | 8.82  | 8.84  | 7.39  | 8.98  | 8.53 | 7.93  | 8.12 |
| 5.99 | 7.91  | 8.35  | 8.28  | 5.91  | 8.26  | 8.47 | 7.6   | 7.36 |
| 6.28 | 8.26  | 8.6   | 8.22  | 6.35  | 8.5   | 8.59 | 7.66  | 7.64 |
| 6.44 | 9.15  | 8.57  | 9.51  | 8.33  | 9.96  | 7.25 | 8.54  | 8.63 |
| 3.43 | 9.91  | 9.85  | 8.65  | 8.21  | 10.31 | 8.08 | 7.62  | 8.81 |
| 2.3  | 9.72  | 9.33  | 8.61  | 7.76  | 9.77  | 8.68 | 7.17  | 8.34 |
| 2.74 | 8.87  | 9.21  | 9.08  | 8.57  | 11.76 | 6.93 | 8     | 8.93 |
| 5.01 | 8.92  | 9.58  | 10.38 | 7.05  | 9.49  | 9.62 | 10.88 | 8.22 |
| 3.63 | 9.09  | 8.77  | 10.36 | 6.87  | 9.6   | 9.23 | 8.3   | 8.7  |
| 4.55 | 10.19 | 9.64  | 10.48 | 6.79  | 9.9   | 9.37 | 8.46  | 9.03 |
| 3.65 | 8.95  | 8.79  | 10.48 | 5.95  | 9.68  | 9.81 | 9.11  | 8.22 |
| 5.5  | 7.76  | 7.8   | 8.43  | 7.21  | 8.49  | 9.01 | 7.16  | 8.23 |
| 3.09 | 8.94  | 8.37  | 8.71  | 6.4   | 8.86  | 9.57 | 7.42  | 8.03 |
| 6.49 | 7.98  | 8.58  | 8.6   | 6.94  | 10.6  | 7.76 | 8.16  | 8.34 |
| 3.58 | 8.25  | 8.11  | 9.17  | 8.81  | 10.35 | 6.32 | 7.38  | 8.64 |
| 5.13 | 9.33  | 8.85  | 8.28  | 6.55  | 9.17  | 8.39 | 7.6   | 8.32 |
| 5.1  | 9.34  | 9.11  | 9     | 6.69  | 10.66 | 6.89 | 8.13  | 8.65 |
| 1.93 | 8.06  | 8.06  | 9.61  | 7.68  | 9.1   | 8.85 | 6.6   | 7.48 |
| 0.54 | 10.35 | 9.19  | 9.57  | 5.48  | 8.66  | 7.71 | 7.32  | 6.88 |
| 1.48 | 8.78  | 8.07  | 9.89  | 5.21  | 7.74  | 7.56 | 6.64  | 5.97 |
| 6.96 | 8.93  | 8.79  | 8.63  | 7.66  | 8.71  | 7.81 | 7.72  | 8.16 |
| 6.68 | 9.45  | 8.84  | 8.99  | 7.21  | 8.81  | 8.21 | 7.59  | 7.85 |
| 4.74 | 8.47  | 11.31 | 8.85  | 6.96  | 11.44 | 5.96 | 8.98  | 8.98 |
| 0.36 | 7.57  | 6.74  | 8.8   | 7.97  | 9.69  | 4.45 | 5.68  | 7.64 |
| 3.38 | 8.89  | 7.38  | 8.59  | 7.08  | 8.93  | 6.31 | 6.04  | 7.23 |
| 2.57 | 9.34  | 7.22  | 8.74  | 5.79  | 8.49  | 6.44 | 6.22  | 7.27 |
| 1.9  | 9.2   | 7.57  | 9.13  | 6.94  | 10.02 | 6.22 | 7.26  | 7.81 |
| 7.66 | 6.28  | 6.93  | 7.34  | 1.76  | 7.08  | 7.31 | 7.37  | 7.37 |
| 7.54 | 7.33  | 7.23  | 7.23  | 3.04  | 7.58  | 6.67 | 7.29  | 7.2  |
| 7.51 | 7.01  | 6.69  | 7.44  | 0.88  | 7.41  | 7.39 | 7.51  | 7.53 |
| 7.53 | 6.31  | 6.66  | 7.35  | 0.96  | 7.68  | 7.24 | 7.15  | 7.4  |
| 5.84 | 6.74  | 6.98  | 8.26  | 6.22  | 7.95  | 6.56 | 6.34  | 6.98 |
| 6.33 | 7.09  | 6.68  | 8.65  | 4.95  | 7.97  | 6.79 | 6.8   | 7.07 |
| 6.38 | 7.96  | 6.93  | 8.43  | 4.9   | 7.95  | 6.85 | 6.76  | 7.33 |
| 6.21 | 8.15  | 7.54  | 8.14  | 4.92  | 8.4   | 6.49 | 6.97  | 7.25 |
| 0.35 | 6.97  | 6.92  | 9.26  | 10.21 | 11    | 1.94 | 6.78  | 8.43 |
| 3.78 | 8.9   | 8.15  | 8.52  | 6.32  | 9.13  | 8.53 | 7.82  | 7.67 |
| 2.42 | 8.74  | 9.11  | 8.82  | 7.45  | 9.99  | 8.38 | 7.02  | 7.52 |
| 4.23 | 7.59  | 10.01 | 8.21  | 9.16  | 11.52 | 6.32 | 8.34  | 8.72 |
| 5.5  | 8.64  | 8.54  | 8.71  | 7.26  | 9.14  | 7.47 | 6.95  | 7.54 |
| 4.51 | 8.42  | 10.39 | 8.42  | 9.32  | 11.55 | 4.51 | 8.21  | 8.97 |
| 2.45 | 9.22  | 8.69  | 8.55  | 7.38  | 9.41  | 8    | 7.52  | 7.81 |
| 0    | 10.01 | 9.01  | 8.31  | 6.69  | 10.14 | 7.98 | 7.59  | 8.32 |
| 0.68 | 6.11  | 8.56  | 9.51  | 6.24  | 6.17  | 6.59 | 4.68  | 8.12 |
| 4.79 | 8.8   | 9.04  | 9.06  | 6.73  | 9.57  | 6.09 | 6.94  | 8.05 |
| 1.28 | 8.62  | 9     | 9.13  | 6.78  | 9.24  | 6.16 | 6.25  | 7.31 |
| 6.26 | 8.33  | 8.6   | 8.92  | 6.39  | 9.48  | 6.75 | 6.65  | 7.49 |
| 1.89 | 8.36  | 8.11  | 8.34  | 7.43  | 8.86  | 6.53 | 5.35  | 7.65 |
| 5.53 | 8     | 6.78  | 7.9   | 5.39  | 8.15  | 6.72 | 6.39  | 7.97 |
| 5.64 | 8.46  | 7.27  | 7.8   | 5.88  | 8.18  | 6.37 | 6.51  | 7.96 |

<https://mc.manuscriptcentral.com/gut>

1  
2  
3  
4  
5  
6  
7  
8  
9  
10  
11  
12  
13  
14  
15  
16  
17  
18  
19  
20  
21  
22  
23  
24  
25  
26  
27  
28  
29  
30  
31  
32  
33  
34  
35  
36  
37  
38  
39  
40  
41  
42  
43  
44  
45  
46  
47  
48  
49  
50  
51  
52  
53  
54  
55  
56  
57  
58  
59  
60

|      |      |       |      |      |       |      |      |      |
|------|------|-------|------|------|-------|------|------|------|
| 2.37 | 8    | 7     | 8.45 | 5.74 | 9.91  | 5.54 | 6.49 | 7.4  |
| 5.1  | 7.92 | 8.26  | 8.09 | 5.85 | 8.23  | 6.01 | 6.68 | 5.96 |
| 4.91 | 9.24 | 7.8   | 7.85 | 3.91 | 7.54  | 6.59 | 5.94 | 5.83 |
| 5.01 | 8.8  | 6.98  | 8.26 | 3.81 | 7.22  | 6.44 | 5.98 | 5.66 |
| 7.72 | 7.62 | 8.18  | 7.58 | 4.14 | 8.32  | 7.08 | 7.34 | 7.31 |
| 0.57 | 8.63 | 8.54  | 8.43 | 6.95 | 9.04  | 7.9  | 5.99 | 7.26 |
| 2.53 | 7.2  | 6.91  | 8.23 | 5.42 | 8.22  | 7.56 | 5.32 | 6.14 |
| 1.94 | 7.11 | 6.94  | 8.25 | 5.52 | 7.96  | 7.58 | 5.08 | 5.98 |
| 8    | 7.03 | 7.65  | 8.03 | 0.27 | 7.43  | 7.76 | 7.63 | 7.92 |
| 6.87 | 7.68 | 7.77  | 7.79 | 6.31 | 8.85  | 7.18 | 7.35 | 7.53 |
| 0    | 7.28 | 6.55  | 8.62 | 8.01 | 9.66  | 7.13 | 6.58 | 7.95 |
| 6.06 | 7.68 | 7.33  | 8.06 | 6.82 | 8.93  | 7.64 | 6.56 | 7.73 |
| 3.62 | 6.78 | 6.75  | 8.21 | 7.48 | 9.48  | 6.76 | 6.93 | 7.38 |
| 5.17 | 7.81 | 6.73  | 8.61 | 6.96 | 9.26  | 6.45 | 6.97 | 7.7  |
| 4.54 | 8.1  | 12.62 | 6.71 | 6.79 | 10.66 | 2.54 | 7.67 | 7.45 |
| 3.12 | 7.43 | 7.87  | 8.28 | 7.24 | 9.3   | 5.95 | 6.28 | 7.7  |
| 5.63 | 7.49 | 7.28  | 7.85 | 6.93 | 8.68  | 6.91 | 6.67 | 7.36 |
| 3.45 | 7.38 | 8.01  | 8.44 | 7.09 | 9.46  | 6.18 | 6.29 | 7.74 |

|    | PLXND1 | PMP22 | PNPLA6 | POPDC3 | POSTN | PPFIBP2 | PPL   | PPP1R16B | PPP2CB |
|----|--------|-------|--------|--------|-------|---------|-------|----------|--------|
| 1  |        |       |        |        |       |         |       |          |        |
| 2  |        |       |        |        |       |         |       |          |        |
| 3  | 8.19   | 7.33  | 7.1    | 6.1    | 8.92  | 6.05    | 6.28  | 7.01     | 9.39   |
| 4  | 8.66   | 7.82  | 7.84   | 5.59   | 8.31  | 7.07    | 9.48  | 6.24     | 9.95   |
| 5  | 8.26   | 7.45  | 7.87   | 5.84   | 7.93  | 6.7     | 10.83 | 6.39     | 9.83   |
| 6  | 9.27   | 8.57  | 8.84   | 2.76   | 9.54  | 7.35    | 10.1  | 5.54     | 9.9    |
| 7  | 8.12   | 7.87  | 3.33   | 7.53   | 6.65  | 2.59    | 1.01  | 8.25     | 10.45  |
| 8  | 8.13   | 7.85  | 7.31   | 6.09   | 9.3   | 6.65    | 6.43  | 6.8      | 9.47   |
| 9  | 8.59   | 8.03  | 7.4    | 5.78   | 9.44  | 6.83    | 5.96  | 6.58     | 9.42   |
| 10 | 8.58   | 8.01  | 9.06   | 4.3    | 10.74 | 6.42    | 6.99  | 5.72     | 9.4    |
| 11 | 9.29   | 8.18  | 8.67   | 0.37   | 11.56 | 7.35    | 6.67  | 5.27     | 9.17   |
| 12 | 7.83   | 7.54  | 7.07   | 5.93   | 9.77  | 6.69    | 7.63  | 5.49     | 9.14   |
| 13 | 8.23   | 8.05  | 7.97   | 1.38   | 9.92  | 7.23    | 6.98  | 5.02     | 9.66   |
| 14 | 8.86   | 8.59  | 8.34   | 0.68   | 10.56 | 6.99    | 8.01  | 5.73     | 9.36   |
| 15 | 8.09   | 7.93  | 8      | 6.09   | 8.5   | 7.93    | 7.44  | 6.48     | 9.39   |
| 16 | 8.97   | 8.39  | 8.27   | 6.08   | 10.08 | 7.83    | 7.23  | 6.94     | 9.55   |
| 17 | 10.02  | 7.86  | 9.98   | 1.77   | 10.56 | 6.52    | 6.35  | 7.19     | 9.51   |
| 18 | 8.57   | 7.95  | 7.9    | 5.99   | 11.12 | 7.43    | 7.71  | 7.3      | 9.81   |
| 19 | 8.22   | 8.1   | 7.44   | 6.1    | 10.34 | 7.54    | 10.14 | 6.68     | 10.12  |
| 20 | 8.42   | 7.95  | 7.81   | 5.93   | 11.54 | 7.1     | 8.38  | 6.54     | 9.99   |
| 21 | 9.25   | 7.43  | 9.15   | 2.22   | 9.94  | 7.64    | 6.31  | 8.19     | 9.23   |
| 22 | 9.31   | 8.13  | 8.43   | 2.31   | 9.82  | 8.31    | 7.33  | 7.2      | 9.88   |
| 23 | 9.64   | 8.44  | 8.87   | 2.31   | 9.72  | 7.57    | 6.47  | 7.81     | 9.56   |
| 24 | 9.06   | 8.45  | 8.69   | 4.15   | 9.71  | 8.01    | 9.04  | 5.24     | 10.08  |
| 25 | 8.82   | 8.19  | 8.38   | 4.59   | 8.92  | 7.9     | 9.36  | 5.66     | 10.1   |
| 26 | 9.06   | 8.76  | 8.54   | 3.8    | 9.75  | 7.82    | 9.05  | 4.75     | 10.21  |
| 27 | 8.65   | 7.08  | 8.44   | 4.6    | 7.89  | 7.82    | 6.4   | 5.47     | 8.84   |
| 28 | 8.21   | 6.73  | 8.47   | 2.13   | 8.42  | 7.8     | 7.04  | 4.59     | 9.78   |
| 29 | 8.1    | 6.98  | 8.33   | 3.33   | 8.1   | 7.96    | 7.81  | 3.84     | 9.66   |
| 30 | 8.09   | 7.24  | 7.82   | 5.5    | 8.64  | 7.33    | 7.12  | 5.89     | 9.76   |
| 31 | 8.01   | 6.62  | 7.61   | 5.81   | 7.52  | 7.5     | 8.34  | 6.84     | 9.35   |
| 32 | 8.48   | 7.37  | 7.76   | 6.04   | 6.92  | 6.78    | 8.17  | 6.36     | 9.16   |
| 33 | 8.7    | 7.02  | 7.86   | 5.52   | 7.37  | 7.27    | 8.62  | 5.92     | 9.54   |
| 34 | 8.66   | 7.53  | 7.86   | 6.84   | 8.58  | 6.07    | 7.84  | 6.66     | 9.46   |
| 35 | 9.1    | 7.31  | 8.18   | 5.3    | 4.9   | 6.5     | 2.35  | 8.54     | 9.49   |
| 36 | 9.45   | 8.93  | 8.57   | 2.38   | 11    | 7.08    | 7.96  | 4.58     | 9.99   |
| 37 | 9.08   | 8.29  | 8.33   | 1.61   | 10.28 | 7.48    | 8.24  | 4.82     | 9.83   |
| 38 | 9.3    | 8.55  | 8.54   | 2.47   | 10.69 | 7.2     | 7.7   | 4.56     | 9.71   |
| 39 | 7.8    | 6.67  | 8.8    | 0.45   | 9.14  | 5.3     | 4.45  | 7.32     | 9.11   |
| 40 | 8.01   | 7.35  | 8.19   | 3.1    | 8.59  | 5.24    | 5.51  | 6.69     | 9.6    |
| 41 | 8.11   | 7.31  | 8.56   | 2.95   | 9.28  | 4.89    | 4.89  | 6.97     | 8.95   |
| 42 | 8.14   | 7.09  | 8.54   | 3.2    | 9.5   | 5.42    | 5.47  | 6.97     | 8.9    |
| 43 | 8.21   | 7     | 6.71   | 5.85   | 9.46  | 5.6     | 6.52  | 6.68     | 8.77   |
| 44 | 7.92   | 7.2   | 6.25   | 6.22   | 8.92  | 5.83    | 7.52  | 6.51     | 8.83   |
| 45 | 7.95   | 6.74  | 6.26   | 5.97   | 8.18  | 6.05    | 6.73  | 6.59     | 8.74   |
| 46 | 7.75   | 7.02  | 6.61   | 5.1    | 9.1   | 6.41    | 7.38  | 6.31     | 8.61   |
| 47 | 7.32   | 6.03  | 9.07   | 5.45   | 7.11  | 5.18    | 5.86  | 5.86     | 7.67   |
| 48 | 7.81   | 7.34  | 7.76   | 3.9    | 8.42  | 7.69    | 6.84  | 5.48     | 9.36   |
| 49 | 8.37   | 8.09  | 8      | 3      | 8.78  | 7.71    | 7.36  | 5.73     | 9.52   |
| 50 | 8.25   | 8.74  | 7.9    | 3.51   | 9.33  | 7.51    | 6.85  | 5.02     | 9.79   |
| 51 | 9.25   | 8.47  | 9.22   | 3.22   | 10    | 7.8     | 8.07  | 6.76     | 10.93  |
| 52 | 9.03   | 8.62  | 8.63   | 2.33   | 10.48 | 7.89    | 7.84  | 4.53     | 11.24  |
| 53 | 8.62   | 7.73  | 8.77   | 1.5    | 9.24  | 8.17    | 8.05  | 5.89     | 11.22  |
| 54 |        |       |        |        |       |         |       |          |        |
| 55 |        |       |        |        |       |         |       |          |        |
| 56 |        |       |        |        |       |         |       |          |        |
| 57 |        |       |        |        |       |         |       |          |        |
| 58 |        |       |        |        |       |         |       |          |        |
| 59 |        |       |        |        |       |         |       |          |        |
| 60 |        |       |        |        |       |         |       |          |        |

|    |      |      |      |      |       |      |       |      |       |
|----|------|------|------|------|-------|------|-------|------|-------|
| 1  |      |      |      |      |       |      |       |      |       |
| 2  | 9.17 | 8.6  | 8.87 | 2.4  | 10.27 | 7.8  | 7.41  | 6.25 | 11.07 |
| 3  | 8.24 | 7.55 | 6.84 | 5.2  | 8.47  | 7.76 | 7.88  | 5.86 | 9.67  |
| 4  | 8.33 | 8.34 | 7    | 5.97 | 8.81  | 7.62 | 7.33  | 6.28 | 9.85  |
| 5  | 8.12 | 8.29 | 7.29 | 6.04 | 8.52  | 7.43 | 7.78  | 6.29 | 9.84  |
| 6  | 8.26 | 8.3  | 6.96 | 6.29 | 8.52  | 7.65 | 7.26  | 6.39 | 9.85  |
| 7  | 8.63 | 7.52 | 8.14 | 3.4  | 9     | 8.64 | 7.52  | 7.01 | 10.51 |
| 8  | 8.61 | 7.57 | 8.85 | 2.25 | 9.11  | 8.52 | 7.99  | 5.29 | 10.84 |
| 9  | 7.63 | 6.31 | 8.23 | 1.81 | 8.76  | 8.95 | 7.2   | 4.32 | 11.2  |
| 10 | 8.36 | 7.95 | 8.99 | 2.02 | 9.56  | 8.9  | 6.86  | 5.02 | 10.54 |
| 11 | 8.87 | 7.11 | 7.94 | 1.17 | 8.69  | 7.33 | 7.51  | 5.63 | 10.74 |
| 12 | 8.81 | 7.47 | 8.07 | 2.54 | 8.56  | 7.6  | 7.9   | 6.24 | 10.62 |
| 13 | 8.83 | 7.47 | 8.08 | 2.14 | 7.98  | 7.22 | 8.37  | 5.24 | 10.77 |
| 14 | 8.74 | 7.91 | 8.04 | 1.56 | 8.63  | 7.47 | 7.94  | 5.37 | 10.59 |
| 15 | 6.74 | 5.15 | 6.74 | 5.15 | 6.15  | 6.74 | 7.47  | 6.15 | 10.4  |
| 16 | 8.56 | 6.6  | 8.94 | 5.74 | 9.54  | 5.11 | 5.65  | 7.18 | 10.46 |
| 17 | 8.27 | 7.27 | 7.98 | 6.55 | 8.91  | 4.45 | 6.16  | 7.24 | 9.83  |
| 18 | 9.8  | 6.92 | 2.24 | 7.14 | 7.49  | 3.95 | 0.24  | 8.89 | 11.46 |
| 19 | 9.16 | 6.84 | 4.48 | 7.48 | 7.08  | 3.58 | 3.1   | 8.65 | 11.34 |
| 20 | 7.57 | 7.87 | 7.12 | 5.66 | 7.62  | 6.27 | 7.97  | 6.09 | 10.44 |
| 21 | 7.29 | 7.72 | 7.09 | 5.97 | 6.98  | 6.7  | 7.96  | 6.07 | 10.64 |
| 22 | 7.59 | 7.75 | 7.13 | 6.39 | 8     | 6.55 | 7.39  | 6.75 | 10.26 |
| 23 | 8.72 | 8.99 | 8.23 | 1.9  | 8.61  | 7.75 | 9.85  | 5.99 | 10.51 |
| 24 | 8.42 | 8.71 | 7.94 | 4.45 | 8.34  | 7.79 | 9.26  | 6.16 | 10.52 |
| 25 | 8.24 | 8.29 | 6.93 | 6.93 | 8.54  | 6.78 | 8.33  | 7.54 | 10.09 |
| 26 | 8.8  | 8.07 | 8.66 | 4.22 | 9.71  | 8.29 | 9.48  | 7.14 | 10.71 |
| 27 | 8.99 | 8.42 | 8.86 | 3.04 | 9.64  | 7.73 | 10.04 | 6.11 | 10.8  |
| 28 | 9.21 | 8.58 | 9.09 | 2.28 | 10.07 | 7.61 | 10.1  | 6.12 | 10.6  |
| 29 | 8.18 | 7.47 | 7.92 | 6.73 | 8.66  | 7.22 | 6.42  | 6.55 | 9.66  |
| 30 | 8.31 | 7.45 | 8.06 | 6.28 | 9.04  | 7.29 | 7.01  | 6.52 | 9.48  |
| 31 | 8.32 | 7.63 | 8.2  | 6.72 | 8.55  | 7.32 | 6.6   | 6.81 | 9.64  |
| 32 | 8.91 | 8.68 | 8.33 | 6.73 | 8.14  | 7.63 | 6.49  | 7.3  | 10.28 |
| 33 | 8.73 | 8.04 | 8.72 | 6.22 | 8.97  | 7.54 | 6.89  | 6.89 | 10.45 |
| 34 | 8.4  | 8.1  | 8.72 | 6.91 | 8.29  | 7.61 | 6.4   | 7.14 | 10.42 |
| 35 | 8.54 | 8.12 | 8.22 | 6.56 | 10.11 | 5.66 | 8.72  | 6.84 | 10.43 |
| 36 | 8.36 | 7.82 | 8.09 | 6.63 | 9.81  | 6.13 | 8.4   | 6.67 | 10.62 |
| 37 | 8.82 | 8.56 | 8.44 | 6.58 | 10.55 | 5.65 | 8.66  | 6.58 | 10.42 |
| 38 | 8.54 | 8.16 | 7.4  | 6.63 | 9.82  | 6.16 | 8.05  | 7.39 | 9.52  |
| 39 | 8.54 | 8.16 | 7.4  | 6.63 | 9.82  | 6.16 | 8.05  | 7.39 | 9.52  |
| 40 | 7.94 | 7.88 | 8.1  | 6.34 | 8.65  | 6.1  | 8.99  | 6.92 | 9.89  |
| 41 | 8.04 | 8.64 | 7.76 | 6.7  | 9.61  | 5.35 | 8.91  | 7.07 | 9.86  |
| 42 | 8.47 | 8.83 | 7.95 | 6.48 | 9.95  | 5.77 | 9.5   | 7    | 9.89  |
| 43 | 8.13 | 7.76 | 7.2  | 7.69 | 7.28  | 6.68 | 5.56  | 7.89 | 9.4   |
| 44 | 8.55 | 8.48 | 7.67 | 6.62 | 9.14  | 7.76 | 6.82  | 6.79 | 9.63  |
| 45 | 8.39 | 8.08 | 7.63 | 6.04 | 10.7  | 7.74 | 7.21  | 6.82 | 9.76  |
| 46 | 8.59 | 8.58 | 7.47 | 7.17 | 9.51  | 6.63 | 6.31  | 7.28 | 9.67  |
| 47 | 8.23 | 8.05 | 8.58 | 2.31 | 9.41  | 7.98 | 8.56  | 4.81 | 10.34 |
| 48 | 7.82 | 8.39 | 8.46 | 0.08 | 8.3   | 8    | 8.93  | 3.54 | 10.71 |
| 49 | 8.65 | 7.96 | 9.21 | 1.52 | 10.57 | 6.77 | 8.09  | 4.77 | 10.14 |
| 50 | 8.09 | 7.74 | 6.95 | 7.26 | 7.75  | 6.11 | 6.15  | 7.53 | 9.53  |
| 51 | 8.78 | 8.68 | 7.72 | 7.07 | 10.48 | 5.77 | 6.85  | 7.05 | 9.82  |
| 52 | 8.23 | 8.66 | 7.69 | 7.25 | 9.31  | 6.16 | 6.83  | 6.88 | 9.86  |
| 53 | 7.63 | 7.51 | 6.9  | 6.42 | 8.82  | 5.35 | 6.53  | 6.82 | 9.68  |

1  
2  
3  
4  
5  
6  
7  
8  
9  
10  
11  
12  
13  
14  
15  
16  
17  
18  
19  
20  
21  
22  
23  
24  
25  
26  
27  
28  
29  
30  
31  
32  
33  
34  
35  
36  
37  
38  
39  
40  
41  
42  
43  
44  
45  
46  
47  
48  
49  
50  
51  
52  
53  
54  
55  
56  
57  
58  
59  
60

|      |      |       |      |       |      |      |      |       |
|------|------|-------|------|-------|------|------|------|-------|
| 7.76 | 7.87 | 7.23  | 6.25 | 9.68  | 5.75 | 6.91 | 6.81 | 9.66  |
| 8.17 | 7.25 | 7.42  | 6.89 | 10.06 | 3.87 | 5.24 | 7.56 | 10.07 |
| 9.03 | 7.72 | 8.14  | 2.05 | 6.75  | 7.26 | 8.02 | 7.97 | 9.57  |
| 9.23 | 9.14 | 8.58  | 4.25 | 9.67  | 7.73 | 11.8 | 6.38 | 10.34 |
| 9.6  | 9.74 | 8.54  | 3.08 | 10.72 | 7.6  | 9.02 | 6.04 | 10.27 |
| 8.85 | 8.07 | 8.78  | 2.41 | 11.09 | 6.8  | 6.75 | 7.26 | 9.46  |
| 8.5  | 7.79 | 8.29  | 1.55 | 10.27 | 7.57 | 7.95 | 4.36 | 10.16 |
| 8.81 | 8.28 | 8.69  | 1.34 | 10.55 | 7.52 | 7.99 | 4.71 | 10.09 |
| 8.83 | 8.2  | 10.59 | 3.49 | 11.35 | 6.58 | 7.02 | 5.3  | 9.89  |
| 8.78 | 7.17 | 8.79  | 2.38 | 10.02 | 6.7  | 7.39 | 5.88 | 9.67  |
| 7.8  | 6.74 | 7.88  | 1.49 | 7.92  | 7.35 | 8.04 | 4.49 | 9.9   |
| 7.47 | 7.01 | 6.83  | 5.85 | 7.03  | 6.69 | 7.85 | 6.46 | 9.84  |
| 8.85 | 7.58 | 9.7   | 3.85 | 10.92 | 6.17 | 7.26 | 5.58 | 9.81  |
| 9.07 | 7.99 | 2.2   | 7.91 | 7.91  | 3.01 | 0.2  | 8.95 | 10.56 |
| 8.64 | 8.42 | 7.33  | 3.27 | 9.93  | 6.66 | 8.94 | 4.34 | 9.38  |
| 8.73 | 8.21 | 7.07  | 0.83 | 9.32  | 6.94 | 8.94 | 4    | 9.35  |
| 8.61 | 8.19 | 7.21  | 1.52 | 9.35  | 6.96 | 9.01 | 4.43 | 9.35  |
| 8.57 | 7.97 | 8.27  | 0    | 9.58  | 6.83 | 9.53 | 6.65 | 9.89  |
| 8.51 | 7.7  | 7.38  | 4.96 | 9.97  | 5.11 | 8.88 | 6.66 | 9.74  |
| 8.91 | 7.85 | 7.88  | 2.98 | 10.3  | 5.64 | 9.23 | 6.81 | 9.85  |
| 7.49 | 7.16 | 10.41 | 7.16 | 8.33  | 5.16 | 5.16 | 6.16 | 8.49  |
| 8.11 | 7.06 | 7.63  | 1.46 | 8.19  | 8.1  | 8.08 | 5.18 | 9.33  |
| 8.55 | 7.95 | 8.1   | 2.54 | 9.05  | 7.25 | 7.61 | 6.37 | 9.32  |
| 8.33 | 7.06 | 8.55  | 1.18 | 8.81  | 6.88 | 7.54 | 4.18 | 9.42  |
| 8.74 | 7.52 | 9.18  | 1.91 | 9.34  | 6.55 | 6.79 | 5.3  | 9.37  |
| 9.26 | 8.65 | 8.83  | 3.35 | 9.46  | 7.56 | 7.8  | 5.67 | 9.3   |
| 8.07 | 7.3  | 5.9   | 7.71 | 6.83  | 3.32 | 2.58 | 7.5  | 9.68  |
| 7.81 | 7.47 | 3.18  | 7.82 | 6.9   | 3.18 | 0.86 | 7.53 | 10.03 |
| 7.67 | 7.38 | 3.35  | 8    | 6.77  | 3.35 | 3.77 | 7.16 | 9.69  |
| 8    | 8.08 | 7.18  | 1.01 | 9.59  | 6.88 | 7.62 | 5.33 | 8.27  |
| 8.32 | 8.56 | 7.56  | 2.18 | 10.68 | 5.98 | 6.67 | 4.88 | 9.03  |
| 8.23 | 7.78 | 7.75  | 0.11 | 9.69  | 6.5  | 6.82 | 4.63 | 8.64  |
| 8.59 | 8.83 | 7.31  | 2.16 | 9.43  | 6.42 | 6.11 | 5.36 | 9.01  |
| 7.57 | 6.7  | 5.54  | 6.93 | 6.68  | 2.77 | 0.45 | 7.01 | 8.99  |
| 7.17 | 6.68 | 4.78  | 6.71 | 6.63  | 2.25 | 2.84 | 6.71 | 9.13  |
| 7.34 | 6.24 | 5.65  | 6.42 | 6.32  | 3.25 | 3.43 | 6.73 | 8.89  |
| 8.39 | 6.32 | 0     | 7.19 | 6.44  | 1.32 | 0    | 7.74 | 10.09 |
| 7.29 | 6.89 | 2.92  | 7.14 | 6.04  | 2.34 | 1.34 | 6.79 | 8.88  |
| 6.77 | 7.16 | 4.68  | 7.42 | 6.68  | 3.68 | 1.1  | 6.65 | 8.88  |
| 6.92 | 7.01 | 4.22  | 7.1  | 6.42  | 3.48 | 2.31 | 7.12 | 8.94  |
| 8.14 | 2.41 | 2.41  | 5.87 | 6     | 4.41 | 2.41 | 6.87 | 11.02 |
| 8.2  | 6.96 | 5.38  | 7.61 | 7.12  | 3.64 | 1.06 | 8.04 | 9.71  |
| 8.23 | 6.99 | 2.13  | 8.26 | 7.09  | 2.5  | 1.91 | 8.23 | 10.11 |
| 7.91 | 5.73 | 6.89  | 6.84 | 7.33  | 4.45 | 0.87 | 7.38 | 9.61  |
| 8.11 | 6.48 | 5.66  | 7.93 | 7.02  | 3.21 | 1.75 | 7.84 | 9.66  |
| 8.4  | 7.35 | 7.09  | 7.09 | 7.5   | 4.58 | 4.58 | 7.39 | 9.49  |
| 8.42 | 7.63 | 6.02  | 7.55 | 7.04  | 3.62 | 2.3  | 7.7  | 9.94  |
| 7.99 | 8.1  | 2.29  | 7.7  | 6.81  | 3.88 | 3.29 | 7.88 | 9.96  |
| 8.81 | 7.39 | 5.18  | 8.22 | 7.1   | 2.48 | 0    | 7.9  | 10.1  |
| 7.61 | 7.4  | 6.65  | 6.6  | 8.2   | 6.79 | 6.23 | 6.58 | 8.81  |
| 8.02 | 7.74 | 7.31  | 6.31 | 8.85  | 7.35 | 6.2  | 6.22 | 8.72  |
| 8.11 | 7.83 | 7.32  | 6.53 | 8.79  | 7.45 | 5.92 | 6.34 | 8.85  |

<https://mc.manuscriptcentral.com/gut>



|    |      |      |      |      |       |      |      |      |       |
|----|------|------|------|------|-------|------|------|------|-------|
| 1  |      |      |      |      |       |      |      |      |       |
| 2  | 8.13 | 7.41 | 7.27 | 6.63 | 8.06  | 7.31 | 6.05 | 6.55 | 8.89  |
| 3  | 8.74 | 8.08 | 8.24 | 7.12 | 10    | 6.86 | 7.41 | 6.6  | 10.18 |
| 4  | 8.88 | 8.24 | 8.35 | 7.14 | 10.69 | 7.18 | 7.13 | 6.38 | 10.22 |
| 5  | 8.1  | 7.1  | 7.39 | 6.36 | 9.92  | 6.79 | 7.1  | 5.95 | 10.17 |
| 6  | 8.15 | 7.02 | 7.54 | 6.15 | 9.75  | 6.79 | 7.18 | 6.12 | 10.15 |
| 7  | 8.69 | 8.13 | 8.3  | 6.67 | 8.98  | 6.73 | 7.58 | 7.7  | 10.07 |
| 8  | 8.78 | 8.69 | 9.44 | 4.01 | 9.09  | 6.82 | 7.86 | 6.75 | 10.54 |
| 9  | 8.71 | 8.43 | 8.63 | 2.98 | 7.87  | 7.25 | 8.14 | 5.79 | 10.58 |
| 10 | 9.28 | 9.5  | 9.65 | 3.74 | 8.91  | 6.36 | 6.93 | 7.1  | 10.16 |
| 11 | 9.74 | 8.68 | 8.53 | 4.22 | 11.45 | 8.46 | 9.15 | 5.35 | 10.92 |
| 12 | 9.41 | 8.87 | 8.69 | 4.17 | 10.07 | 8.11 | 8.48 | 6.02 | 10.78 |
| 13 | 9.45 | 9.17 | 8.9  | 3.38 | 10.69 | 8.13 | 8.53 | 6.22 | 10.83 |
| 14 | 9.35 | 8.56 | 8.71 | 3.06 | 10.29 | 8.2  | 8.65 | 5.76 | 10.79 |
| 15 | 8.4  | 7.87 | 8.02 | 5.71 | 8.05  | 7.36 | 7.46 | 6.14 | 9.44  |
| 16 | 8.95 | 7.97 | 8.44 | 1.09 | 8.38  | 7.96 | 8.33 | 5.46 | 9.7   |
| 17 | 8.81 | 8.51 | 8.85 | 6.34 | 9.34  | 6.59 | 6.93 | 6.7  | 9.81  |
| 18 | 9.13 | 8.5  | 8.68 | 0    | 9.52  | 7.06 | 6.12 | 7.4  | 9.04  |
| 19 | 8.65 | 8.38 | 8.5  | 2.25 | 10.63 | 7.76 | 6.82 | 4.91 | 9.68  |
| 20 | 9.26 | 8.8  | 8.82 | 0.52 | 11.35 | 7.44 | 7.09 | 5.91 | 9.87  |
| 21 | 8.3  | 7.83 | 7.89 | 0.93 | 9.32  | 7.18 | 7.7  | 6.45 | 10.31 |
| 22 | 8.37 | 8.1  | 8.36 | 1.87 | 11.07 | 7.37 | 7.39 | 4.3  | 9.1   |
| 23 | 7.51 | 7.38 | 8.43 | 0    | 9.07  | 7.63 | 7.46 | 2.94 | 8.47  |
| 24 | 9.07 | 8.21 | 7.57 | 5.35 | 9.27  | 6.01 | 7.52 | 6.19 | 9.69  |
| 25 | 9.06 | 8.02 | 7.53 | 5.39 | 9.37  | 6.29 | 8.01 | 6.18 | 9.65  |
| 26 | 9.06 | 8.06 | 9.49 | 4.15 | 9.92  | 6.32 | 6.32 | 5.47 | 9.91  |
| 27 | 7.85 | 6.19 | 7.49 | 0.36 | 8.61  | 6.29 | 5.22 | 6.68 | 8.09  |
| 28 | 7.89 | 7.6  | 6.96 | 2.79 | 8.32  | 6.7  | 5.11 | 5.43 | 8.68  |
| 29 | 7.76 | 6.92 | 6.92 | 1.76 | 8.9   | 6.82 | 5.38 | 5.26 | 8.58  |
| 30 | 7.65 | 7.03 | 7.63 | 1.9  | 8.77  | 7.29 | 5.6  | 6.07 | 9.29  |
| 31 | 7.15 | 6.62 | 4.34 | 7.08 | 6.15  | 4.08 | 1.76 | 7.22 | 8.59  |
| 32 | 6.83 | 6.63 | 5.72 | 7.09 | 8.3   | 4.18 | 1.72 | 6.65 | 8.75  |
| 33 | 7.19 | 6.77 | 3.47 | 7.38 | 5.59  | 3.69 | 0.88 | 6.93 | 8.82  |
| 34 | 7.2  | 6.45 | 5.04 | 7.33 | 6.42  | 3.54 | 2.54 | 6.81 | 8.99  |
| 35 | 7.11 | 5.75 | 6.35 | 5.36 | 7.74  | 3.61 | 5.31 | 5.87 | 8.31  |
| 36 | 7.22 | 6.69 | 5.98 | 5.95 | 6.78  | 4.3  | 5.18 | 5.85 | 8.49  |
| 37 | 7.25 | 6.98 | 6    | 5.57 | 8.08  | 4.23 | 5.16 | 5.62 | 8.6   |
| 38 | 7.46 | 7.48 | 6.38 | 5.4  | 8.5   | 4.42 | 5.21 | 5.69 | 8.74  |
| 39 | 8.63 | 6.38 | 8.68 | 0.35 | 5.71  | 6.73 | 1.94 | 9.34 | 8.62  |
| 40 | 7.94 | 7.42 | 7.97 | 4.63 | 8.9   | 6.82 | 8.02 | 5.99 | 10.05 |
| 41 | 8.31 | 7.43 | 8.63 | 2.42 | 8.5   | 7.7  | 3.59 | 6.49 | 9.72  |
| 42 | 8.01 | 7.14 | 10.3 | 2.23 | 7.93  | 5.82 | 3.82 | 7.69 | 9.22  |
| 43 | 8.02 | 7.04 | 7.45 | 5.52 | 6.76  | 7.37 | 5.93 | 5.93 | 9.89  |
| 44 | 8.83 | 7.1  | 10.1 | 4.51 | 9.46  | 6.1  | 4.51 | 7.51 | 9.15  |
| 45 | 8.6  | 8.43 | 7.87 | 5.26 | 9.95  | 7.36 | 6.38 | 5.73 | 10.13 |
| 46 | 8.54 | 8.83 | 8.11 | 4.64 | 10.9  | 6.74 | 6.68 | 4.89 | 10.3  |
| 47 | 7.56 | 5.93 | 7.93 | 5.44 | 3.85  | 7.16 | 8.7  | 3.68 | 9.38  |
| 48 | 8.22 | 7.44 | 8.54 | 4.84 | 8.66  | 6.39 | 7.66 | 5.74 | 9.51  |
| 49 | 8.49 | 7.72 | 8.4  | 5.4  | 8.53  | 6.68 | 8.28 | 5.08 | 9.37  |
| 50 | 8.43 | 7.67 | 7.67 | 5.81 | 8.2   | 6.83 | 7.65 | 6.48 | 9.42  |
| 51 | 8.01 | 7.18 | 7.34 | 0    | 9.03  | 6.11 | 5.74 | 6.42 | 8.9   |
| 52 | 7.65 | 7.75 | 6.66 | 4.11 | 8.07  | 5.66 | 5.89 | 5.62 | 9     |
| 53 | 7.57 | 7.67 | 6.34 | 4.92 | 7.78  | 5.67 | 5.39 | 5.26 | 8.8   |

|      |      |      |      |       |      |      |      |       |
|------|------|------|------|-------|------|------|------|-------|
| 7.93 | 7.73 | 7.61 | 0.79 | 7.89  | 6.11 | 5.43 | 4.6  | 8.92  |
| 7.71 | 7.7  | 7.54 | 4.27 | 10.22 | 6.27 | 5.1  | 4.42 | 9.19  |
| 6.96 | 6.54 | 6.94 | 4.49 | 8.54  | 5.11 | 6.26 | 4.59 | 8.93  |
| 7.15 | 6.6  | 7.16 | 4.07 | 8.89  | 5.01 | 6.6  | 4.19 | 9.12  |
| 6.6  | 6.72 | 7.01 | 7.01 | 7.66  | 3.55 | 1.55 | 5.8  | 9.47  |
| 7.77 | 7.64 | 7.39 | 0    | 8.08  | 6.87 | 5.32 | 5.67 | 9.38  |
| 6.93 | 5.54 | 7.07 | 0.65 | 6.72  | 6.51 | 3.46 | 4.85 | 8.55  |
| 6.63 | 5.54 | 7.2  | 1.35 | 6.37  | 6.53 | 3.88 | 4.48 | 8.51  |
| 7.43 | 7.26 | 1.27 | 7.08 | 6.03  | 3.44 | 0.27 | 7.25 | 9.35  |
| 7.68 | 7.47 | 6.46 | 6.56 | 8.42  | 5.89 | 3.77 | 6.76 | 9.24  |
| 8.01 | 8.02 | 7.84 | 0    | 8.55  | 7.25 | 6.49 | 6.85 | 9.45  |
| 8.23 | 7.89 | 7.71 | 4.7  | 8.97  | 6.89 | 5.75 | 6.1  | 9.72  |
| 8.16 | 8.15 | 8.25 | 2.3  | 8.35  | 6.71 | 5.76 | 6.21 | 9.77  |
| 8.71 | 8.82 | 7.6  | 4.03 | 9.66  | 6.83 | 5.41 | 6.26 | 9.76  |
| 7.07 | 6.35 | 9.94 | 3.54 | 10.53 | 5.54 | 5.71 | 4.87 | 10.03 |
| 7.98 | 6.63 | 7.73 | 2.8  | 8.42  | 6.56 | 6.03 | 6.03 | 9.09  |
| 7.99 | 6.87 | 6.96 | 5.63 | 7.81  | 6.94 | 6.05 | 6.5  | 9.45  |
| 8.03 | 6.61 | 8.03 | 3.07 | 8.63  | 6.49 | 6.35 | 5.86 | 9.08  |

1  
2  
3  
4  
5  
6  
7  
8  
9  
10  
11  
12  
13  
14  
15  
16  
17  
18  
19  
20  
21  
22  
23  
24  
25  
26  
27  
28  
29  
30  
31  
32  
33  
34  
35  
36  
37  
38  
39  
40  
41  
42  
43  
44  
45  
46  
47  
48  
49  
50  
51  
52  
53  
54  
55  
56  
57  
58  
59  
60

| PPP2R1A | PPP3R1 | PRELP | PRF1 | PRKCB | PRKCG | PRK CZ | PROK2 | PROM1 |
|---------|--------|-------|------|-------|-------|--------|-------|-------|
| 8.88    | 9.38   | 7.25  | 7.8  | 7.12  | 1.88  | 5.95   | 7.67  | 8.69  |
| 9.66    | 9.76   | 6.59  | 7.48 | 5.69  | 3.54  | 7.15   | 6.44  | 9.69  |
| 9.53    | 9.63   | 6.4   | 7.39 | 5.97  | 3.89  | 7.04   | 6.74  | 9.37  |
| 10.46   | 10.42  | 5.31  | 7.02 | 6.88  | 4.5   | 7.23   | 6.67  | 10.62 |
| 2.01    | 8.82   | 8.41  | 8.62 | 4.82  | 1.01  | 6.33   | 9.12  | 8.03  |
| 8.98    | 9.26   | 6.89  | 7.87 | 5.7   | 4.98  | 5.95   | 7.05  | 8.2   |
| 9.01    | 9.31   | 6.84  | 7.88 | 5.96  | 4.24  | 6.11   | 7.44  | 8.21  |
| 10.34   | 10.44  | 3.85  | 7.96 | 8.04  | 5.64  | 6.39   | 4.3   | 8.16  |
| 10.42   | 10.2   | 5.01  | 7.26 | 7.26  | 2.69  | 6.76   | 2.69  | 8.83  |
| 9.8     | 9.74   | 6.43  | 6.65 | 4.08  | 1.91  | 6.78   | 6.61  | 8.45  |
| 10.35   | 10.18  | 2.96  | 5.93 | 5.74  | 3.38  | 7.05   | 3.7   | 8.97  |
| 10.19   | 10.15  | 4.59  | 6.35 | 6.68  | 2.27  | 6.83   | 4.27  | 8.35  |
| 10.32   | 9.65   | 6.95  | 7.03 | 4.39  | 6.28  | 7.21   | 6.98  | 7.12  |
| 10.13   | 9.69   | 7.1   | 7.86 | 5.96  | 5.8   | 6.85   | 7.63  | 8.37  |
| 11.43   | 11.13  | 4.94  | 8.29 | 9.91  | 6.23  | 6.94   | 3.35  | 10.83 |
| 9.98    | 9.98   | 7.05  | 8.02 | 7.43  | 3.53  | 6.92   | 7.39  | 9.01  |
| 10.4    | 10.05  | 7.1   | 7.65 | 5.29  | 4.87  | 7.48   | 7.4   | 9.28  |
| 10.01   | 9.85   | 7.5   | 7.43 | 6.25  | 4.93  | 7.39   | 7.86  | 9.12  |
| 10.65   | 10.78  | 5.15  | 9.03 | 9.9   | 7.07  | 7.23   | 3.9   | 2.9   |
| 10.67   | 10.18  | 3.63  | 8.31 | 7.49  | 6.3   | 7.69   | 4.26  | 7.05  |
| 10.51   | 10.27  | 4.79  | 9.12 | 8.63  | 6.72  | 7.27   | 4.25  | 4.08  |
| 11.51   | 10.49  | 4.67  | 6.89 | 5.88  | 7.07  | 7.57   | 3.96  | 8.62  |
| 11.66   | 10.46  | 3.9   | 6.67 | 5.87  | 6.94  | 7.88   | 3.01  | 8.5   |
| 11.39   | 10.4   | 6.08  | 6.35 | 6.42  | 6.89  | 7.79   | 3.59  | 8.93  |
| 10.38   | 10.08  | 4.67  | 8.52 | 6.92  | 5.47  | 7.47   | 2.43  | 7.36  |
| 10.98   | 10.49  | 1.71  | 4.99 | 5.52  | 4.99  | 7.57   | 5.65  | 8.54  |
| 10.89   | 10.41  | 3.11  | 4.52 | 4.98  | 4.11  | 7.73   | 4.98  | 8.63  |
| 10.21   | 10     | 6.47  | 6.89 | 5.75  | 4.31  | 7.67   | 7.16  | 9.06  |
| 10.1    | 9.58   | 6.9   | 7.4  | 6.63  | 2.28  | 7.99   | 6.67  | 9.79  |
| 10.07   | 9.85   | 6.77  | 7.65 | 6.26  | 2.94  | 7.76   | 7.6   | 9.9   |
| 10.32   | 9.69   | 6.41  | 7.36 | 4.95  | 1.2   | 8.21   | 7.09  | 11.09 |
| 9.49    | 9.56   | 7.32  | 7.97 | 6.44  | 0.71  | 7.75   | 7.58  | 10.1  |
| 9.02    | 9.77   | 6.68  | 8.38 | 9.27  | 1.67  | 6.68   | 7.23  | 6.66  |
| 10.59   | 10.2   | 6.23  | 5.79 | 6.21  | 5.31  | 6.75   | 7.1   | 10.09 |
| 10.61   | 10.34  | 4.07  | 6.17 | 5.8   | 4.7   | 7      | 7.23  | 9.21  |
| 10.64   | 10.19  | 5.28  | 6.76 | 6.88  | 4.99  | 6.99   | 4.72  | 9.5   |
| 9.97    | 10.31  | 3.03  | 8.46 | 9.23  | 2.45  | 6.12   | 3.25  | 4.15  |
| 9.94    | 9.94   | 1.4   | 9.03 | 7.17  | 3.1   | 6.74   | 7.23  | 5.33  |
| 9.73    | 9.88   | 4.37  | 9.64 | 8.21  | 3.17  | 5.95   | 5.5   | 4.54  |
| 9.71    | 9.87   | 4.2   | 9.55 | 8.19  | 2.74  | 6.4    | 3.65  | 4.74  |
| 8.63    | 8.96   | 6.77  | 7.22 | 6.05  | 5.37  | 5.7    | 6.96  | 8.36  |
| 8.63    | 8.93   | 6.72  | 7.03 | 4.65  | 5.25  | 6.05   | 7.15  | 8.4   |
| 8.29    | 8.83   | 6.76  | 7.04 | 4.12  | 4.03  | 6.03   | 7.27  | 8.37  |
| 9.22    | 9.2    | 5.72  | 6.31 | 4.21  | 5.72  | 6.31   | 6.4   | 8.67  |
| 11.27   | 11.03  | 4.45  | 6.56 | 8.38  | 7.72  | 7.77   | 3.86  | 6.32  |
| 10.18   | 10.1   | 4.12  | 6.36 | 6.44  | 3.64  | 7.58   | 3.48  | 9.12  |
| 10.18   | 10.09  | 5.04  | 6.67 | 6.17  | 4.17  | 7.28   | 3.46  | 8.73  |
| 10.06   | 9.93   | 6.59  | 6.35 | 6.23  | 4.67  | 6.87   | 3.27  | 7.71  |
| 11.59   | 10.78  | 5.76  | 8.42 | 7.85  | 4.63  | 7.77   | 3.96  | 7.06  |
| 11.44   | 10.54  | 5.05  | 7.34 | 6.28  | 5.44  | 7.24   | 5.37  | 7.21  |
| 10.8    | 10.49  | 4.2   | 8.26 | 6.92  | 6.14  | 7.08   | 4.3   | 6.83  |

<https://mc.manuscriptcentral.com/gut>

|    |       |       |      |       |      |      |      |      |       |
|----|-------|-------|------|-------|------|------|------|------|-------|
| 1  |       |       |      |       |      |      |      |      |       |
| 2  | 11.2  | 10.53 | 4.66 | 8.19  | 7.34 | 6.08 | 7.04 | 2.89 | 6.19  |
| 3  | 10.78 | 10.49 | 7.17 | 7.61  | 5.67 | 2.35 | 7.51 | 7.02 | 8.41  |
| 4  | 10.72 | 10.49 | 6.98 | 8.81  | 4.65 | 3    | 7.26 | 6.86 | 8.77  |
| 5  | 10.74 | 10.54 | 6.51 | 8.57  | 4.81 | 2.28 | 7.02 | 6.71 | 9.5   |
| 6  | 10.62 | 10.33 | 6.85 | 8.95  | 5.67 | 3.55 | 7.07 | 7    | 8.7   |
| 7  | 10.48 | 10.79 | 5.96 | 7.44  | 8.3  | 6.06 | 7.2  | 5.55 | 7.18  |
| 8  | 11.01 | 10.97 | 4.05 | 6     | 6.13 | 7    | 6.92 | 4.25 | 8.62  |
| 9  | 10.87 | 10.9  | 3.32 | 5.21  | 4    | 5.96 | 7.23 | 3.59 | 8.61  |
| 10 | 11.11 | 10.88 | 5.53 | 5.76  | 6.39 | 7.56 | 7.39 | 3.61 | 6.85  |
| 11 | 10.56 | 10.04 | 4.04 | 7.11  | 6.27 | 4.44 | 7.77 | 1.17 | 4.34  |
| 12 | 10.43 | 10.08 | 4.24 | 7.14  | 7.13 | 3.86 | 7.93 | 5.3  | 7.32  |
| 13 | 10.45 | 10.11 | 3.82 | 6.66  | 5.77 | 2.99 | 8.16 | 2.82 | 6.34  |
| 14 | 10.32 | 10.09 | 4.23 | 6.98  | 6.59 | 2.79 | 8.26 | 0.98 | 6.04  |
| 15 | 8.85  | 9.61  | 7.74 | 10.93 | 9.4  | 6.15 | 9.06 | 9.85 | 5.15  |
| 16 | 10.78 | 10.87 | 7.23 | 9.42  | 8.57 | 6.34 | 7.52 | 7.84 | 7.43  |
| 17 | 9.89  | 10.18 | 7.54 | 8.74  | 7.19 | 6.23 | 6.98 | 7.68 | 7.29  |
| 18 | 2.83  | 9.49  | 9.7  | 9.99  | 1.24 | 0.24 | 8.11 | 9.83 | 9.28  |
| 19 | 5.48  | 9.44  | 9.15 | 9.74  | 6.42 | 1.77 | 7.62 | 9.49 | 9.16  |
| 20 | 10.23 | 10.19 | 6.37 | 7.17  | 4.14 | 6.14 | 7.14 | 5.81 | 9.02  |
| 21 | 10.41 | 10.17 | 6.32 | 7.03  | 3.17 | 5.8  | 7.22 | 5.99 | 9.12  |
| 22 | 10.13 | 9.99  | 6.82 | 7.23  | 5.76 | 6.15 | 7.03 | 6.61 | 9.11  |
| 23 | 11.17 | 10.52 | 5.63 | 5.97  | 5.99 | 6.29 | 7.66 | 3.62 | 4.49  |
| 24 | 10.93 | 10.16 | 6.14 | 6.32  | 5.64 | 5.74 | 7.53 | 5.56 | 5.28  |
| 25 | 10.49 | 10.01 | 7.59 | 7.63  | 4.96 | 5.63 | 6.51 | 6.86 | 6.26  |
| 26 | 10.93 | 10.66 | 4.1  | 8.42  | 7.27 | 5.28 | 6.81 | 5.16 | 9.46  |
| 27 | 11.06 | 10.45 | 4.95 | 7.76  | 6.21 | 5.82 | 7.16 | 4.29 | 10.02 |
| 28 | 11.19 | 10.48 | 4.86 | 8.18  | 6.6  | 5.78 | 6.76 | 3.5  | 9.62  |
| 29 | 10.51 | 10.01 | 6.49 | 7.87  | 5.75 | 3.68 | 7.49 | 6.64 | 9.12  |
| 30 | 10.76 | 10.05 | 6.73 | 7.53  | 5.71 | 2.79 | 7.66 | 6.62 | 9.54  |
| 31 | 10.6  | 9.92  | 7.08 | 7.83  | 6.11 | 3.15 | 7.57 | 6.81 | 9.14  |
| 32 | 10.5  | 10.04 | 7.6  | 7.87  | 5.67 | 3.93 | 8.33 | 7.55 | 10.11 |
| 33 | 10.88 | 10.12 | 7.33 | 7.64  | 5.24 | 3.66 | 8.38 | 7.33 | 10.61 |
| 34 | 10.66 | 10.06 | 7.7  | 7.66  | 5.24 | 4.51 | 8.25 | 7.58 | 10.26 |
| 35 | 10.08 | 9.7   | 7.1  | 7.56  | 5.16 | 5.43 | 6.98 | 6.91 | 7.33  |
| 36 | 10.02 | 9.69  | 7.11 | 7.8   | 5.46 | 4.74 | 6.93 | 8.44 | 8.09  |
| 37 | 10.15 | 9.81  | 7.17 | 7.71  | 5.9  | 5.7  | 7.02 | 7.34 | 7.39  |
| 38 | 9.01  | 9.39  | 7.74 | 8.04  | 7.47 | 2.44 | 6.63 | 7.48 | 8.18  |
| 39 | 9.01  | 9.39  | 7.74 | 8.04  | 7.47 | 2.44 | 6.63 | 7.48 | 8.18  |
| 40 | 9.77  | 9.71  | 7.76 | 7.72  | 6.06 | 2.15 | 6.96 | 7.36 | 8.38  |
| 41 | 9.63  | 9.71  | 7.84 | 7.92  | 6.57 | 2.18 | 6.84 | 7.52 | 8.06  |
| 42 | 9.73  | 9.59  | 7.66 | 7.73  | 5.66 | 2.27 | 6.95 | 7.16 | 7.42  |
| 43 | 8.74  | 9.16  | 7.92 | 8.07  | 7.66 | 2.14 | 6.62 | 7.77 | 8.1   |
| 44 | 10.08 | 9.46  | 7.46 | 7.54  | 5.55 | 3.3  | 6.64 | 8.06 | 8.58  |
| 45 | 10.2  | 9.7   | 7.14 | 7.36  | 4.99 | 2.53 | 6.46 | 7.57 | 8.21  |
| 46 | 9.47  | 9.54  | 7.49 | 7.86  | 6.49 | 2.2  | 6.37 | 8.05 | 8.48  |
| 47 | 10.87 | 10.35 | 4.68 | 6.47  | 6.43 | 6.7  | 7.79 | 3.43 | 3.53  |
| 48 | 10.94 | 10.45 | 2.88 | 4.88  | 4.16 | 5.57 | 8.11 | 3.54 | 7.68  |
| 49 | 10.88 | 10.75 | 4.1  | 7.06  | 8.4  | 6.07 | 7.47 | 5.52 | 5.87  |
| 50 | 8.34  | 9.15  | 7.65 | 7.75  | 7.72 | 4.4  | 6.51 | 7.69 | 7.84  |
| 51 | 9.31  | 9.34  | 7.66 | 7.64  | 5.82 | 4.1  | 6.18 | 7.54 | 8.26  |
| 52 | 9.27  | 9.3   | 7.91 | 7.55  | 5.59 | 3.92 | 6.26 | 7.41 | 8.24  |
| 53 | 9.71  | 9.09  | 7.24 | 7.75  | 5.26 | 3.72 | 6.1  | 7.47 | 8.76  |

<https://mc.manuscriptcentral.com/gut>

|    |       |       |      |      |      |      |      |      |       |
|----|-------|-------|------|------|------|------|------|------|-------|
| 1  |       |       |      |      |      |      |      |      |       |
| 2  | 10.11 | 9.22  | 6.89 | 7.57 | 4.47 | 1.89 | 5.77 | 6.8  | 9.11  |
| 3  | 9.57  | 9.16  | 8.06 | 8.27 | 4.99 | 2.78 | 6.75 | 8.25 | 8.3   |
| 4  | 10.28 | 9.9   | 6.36 | 7.56 | 8.72 | 5.2  | 6.6  | 6.09 | 8.21  |
| 5  | 10.71 | 10.18 | 5.86 | 6.8  | 6.65 | 5.57 | 6.97 | 6.62 | 10.48 |
| 6  | 10.42 | 10.06 | 7.04 | 6.85 | 6.53 | 5.81 | 6.37 | 5.4  | 10.98 |
| 7  | 10.49 | 10.61 | 5.41 | 8.38 | 8.86 | 3.87 | 6.56 | 3.87 | 6.96  |
| 8  | 10.6  | 10.27 | 3.25 | 5.76 | 5.68 | 2.72 | 7.07 | 5.57 | 10.47 |
| 9  | 10.53 | 10.32 | 4.22 | 6.48 | 5.97 | 2.93 | 6.7  | 4.51 | 9.61  |
| 10 | 11.49 | 11.73 | 4.49 | 7.92 | 9.68 | 4.49 | 6.4  | 6.08 | 9.52  |
| 11 | 10.9  | 10.46 | 4.38 | 7.36 | 8.4  | 7.77 | 6.52 | 4.11 | 8.75  |
| 12 | 10.78 | 10.4  | 3.08 | 6.56 | 5.95 | 7.87 | 7.36 | 4.08 | 9.3   |
| 13 | 10.01 | 9.61  | 6.94 | 6.75 | 4.59 | 6.16 | 6.69 | 7.01 | 8.69  |
| 14 | 11.62 | 11.28 | 4.58 | 8.17 | 8.7  | 8.8  | 5.96 | 4.58 | 9.12  |
| 15 | 0.2   | 9.71  | 9.53 | 9.22 | 0.2  | 0    | 6.77 | 9.11 | 8.17  |
| 16 | 9.44  | 10.35 | 4.9  | 9.89 | 3.12 | 0.95 | 7.26 | 4.41 | 7.73  |
| 17 | 9.54  | 10.41 | 0.83 | 9.37 | 3.64 | 2.42 | 7.49 | 3.64 | 8.46  |
| 18 | 9.49  | 10.31 | 4.84 | 9.38 | 4.22 | 0.52 | 7.13 | 4.04 | 8.2   |
| 19 | 10.08 | 9.81  | 3.34 | 8.43 | 7.02 | 6.03 | 7.05 | 3.52 | 8.74  |
| 20 | 9.68  | 9.41  | 5.95 | 8.26 | 6.1  | 5.41 | 6.75 | 6.22 | 8.66  |
| 21 | 9.96  | 9.66  | 5.07 | 8.4  | 6.93 | 5.66 | 6.64 | 5.2  | 8.54  |
| 22 | 11    | 11.07 | 6.16 | 9.07 | 12.2 | 6.75 | 5.16 | 8.33 | 8.16  |
| 23 | 10.66 | 9.85  | 1.46 | 5.64 | 5.66 | 6.97 | 6.46 | 6.35 | 11    |
| 24 | 10.43 | 9.85  | 2.54 | 6.88 | 7.18 | 6.88 | 6.49 | 5.18 | 10.51 |
| 25 | 11.29 | 10.29 | 4.99 | 5.88 | 7.81 | 7.22 | 7.41 | 2.18 | 8.63  |
| 26 | 11.36 | 10.64 | 5.15 | 7.02 | 8.46 | 7.49 | 6.84 | 2.91 | 8.33  |
| 27 | 10.74 | 9.96  | 5.75 | 6.47 | 7.28 | 6.69 | 6.75 | 3.86 | 7.7   |
| 28 | 6.83  | 8.89  | 8.47 | 8.41 | 5.58 | 1    | 6.32 | 8.31 | 8.65  |
| 29 | 0.86  | 8.74  | 8.73 | 8.52 | 2.44 | 1.86 | 6.5  | 8.82 | 8.54  |
| 30 | 1.77  | 8.78  | 8.34 | 8.29 | 2.77 | 1.77 | 5.67 | 8.4  | 8.23  |
| 31 | 9.17  | 9.16  | 5.84 | 5.53 | 6.08 | 1.59 | 6.05 | 2.33 | 9.44  |
| 32 | 9.66  | 9.33  | 5.72 | 5.42 | 6.15 | 0    | 5.47 | 6.29 | 9.43  |
| 33 | 9.77  | 9.85  | 4.5  | 5.43 | 6.52 | 1.11 | 5.97 | 3.43 | 9.65  |
| 34 | 9.48  | 9.37  | 6.31 | 5.96 | 6.51 | 1.74 | 4.91 | 4.06 | 8.71  |
| 35 | 6.56  | 8.5   | 7.62 | 8.15 | 6.33 | 1.45 | 5.36 | 7.75 | 7.43  |
| 36 | 7.15  | 8.15  | 7.12 | 7.65 | 3.95 | 1.84 | 5.81 | 7.19 | 7.44  |
| 37 | 8.11  | 8.22  | 6.8  | 7.61 | 3.99 | 1.67 | 5.37 | 6.94 | 7.47  |
| 38 | 0     | 8.08  | 7.99 | 8.6  | 0    | 0    | 6.64 | 8.19 | 8.18  |
| 39 | 4.79  | 8.04  | 7.27 | 7.48 | 5.79 | 1.34 | 5.51 | 7.58 | 7.51  |
| 40 | 4.9   | 7.67  | 7.49 | 7.89 | 3.68 | 1.1  | 5.85 | 7.51 | 7.33  |
| 41 | 6.19  | 7.97  | 7.4  | 7.67 | 3.12 | 1.89 | 5.4  | 7.36 | 7.69  |
| 42 | 4.73  | 7.27  | 6.5  | 9.58 | 2.41 | 2.41 | 8.14 | 9.46 | 6.66  |
| 43 | 6.48  | 8.99  | 8.42 | 8.71 | 6.34 | 1.06 | 6.18 | 8.65 | 8.26  |
| 44 | 1.33  | 8.99  | 8.74 | 8.97 | 0.91 | 0.33 | 6.68 | 9.01 | 8.85  |
| 45 | 10.03 | 9.48  | 7.81 | 8.57 | 6.08 | 4.77 | 6.04 | 7.62 | 8.47  |
| 46 | 8.31  | 8.92  | 8.43 | 8.68 | 4.39 | 3.45 | 6.23 | 8.39 | 8.43  |
| 47 | 9.08  | 9.06  | 7.78 | 8.02 | 6.74 | 4.43 | 6.28 | 7.58 | 8.57  |
| 48 | 7.63  | 9.08  | 8.72 | 8.4  | 4.2  | 4.1  | 6.79 | 7.91 | 8.22  |
| 49 | 2.71  | 8.8   | 8.76 | 8.41 | 2.29 | 2.29 | 6.81 | 8.17 | 8.22  |
| 50 | 6.24  | 8.97  | 8.54 | 8.77 | 2.71 | 2.48 | 7.01 | 8.35 | 8.21  |
| 51 | 8.83  | 8.98  | 6.14 | 6.71 | 4.91 | 1.91 | 7.07 | 6.78 | 9.32  |
| 52 | 8.94  | 9.04  | 6.19 | 5.95 | 4.74 | 0.74 | 7.32 | 6.37 | 9.74  |
| 53 | 8.93  | 9.08  | 6.54 | 6.43 | 5.04 | 2.04 | 7.15 | 6.88 | 9.43  |

<https://mc.manuscriptcentral.com/gut>

1  
2  
3  
4  
5  
6  
7  
8  
9  
10  
11  
12  
13  
14  
15  
16  
17  
18  
19  
20  
21  
22  
23  
24  
25  
26  
27  
28  
29  
30  
31  
32  
33  
34  
35  
36  
37  
38  
39  
40  
41  
42  
43  
44  
45  
46  
47  
48  
49  
50  
51  
52  
53  
54  
55  
56  
57  
58  
59  
60

|       |       |      |      |       |      |      |      |       |
|-------|-------|------|------|-------|------|------|------|-------|
| 8.74  | 8.96  | 6.85 | 6.79 | 5.52  | 1.85 | 7.63 | 7    | 8.86  |
| 10.06 | 10.3  | 7.13 | 7.74 | 7.13  | 3.1  | 7.05 | 7.09 | 9.68  |
| 10.07 | 10.3  | 7.07 | 7.59 | 6.04  | 2.46 | 7.37 | 8.29 | 9.53  |
| 9.94  | 10.03 | 6.67 | 7.36 | 4.33  | 1.74 | 7.01 | 7.55 | 9.26  |
| 9.96  | 10.1  | 6.76 | 7.46 | 4.78  | 2.41 | 7.03 | 7.23 | 9.52  |
| 10.88 | 10.12 | 7.58 | 7.88 | 7.93  | 0.76 | 7.22 | 6.8  | 9.15  |
| 11.78 | 11.1  | 5.7  | 7.95 | 7.97  | 1.84 | 7.72 | 6.09 | 9.71  |
| 11.39 | 10.64 | 4.68 | 7.34 | 7.14  | 3.56 | 8.16 | 5.93 | 10.19 |
| 11.31 | 11.03 | 6.57 | 8.84 | 9.32  | 3.06 | 7.74 | 5.06 | 9.51  |
| 11.08 | 10.41 | 6.05 | 6.83 | 6.49  | 5.01 | 6.38 | 5.52 | 4.57  |
| 10.74 | 10.24 | 6.85 | 7.14 | 6.78  | 4.17 | 6.78 | 6.17 | 6.67  |
| 10.76 | 10.33 | 6.41 | 6.71 | 6.83  | 4.09 | 6.57 | 8.21 | 5.63  |
| 10.82 | 10.36 | 6.27 | 6.09 | 6.44  | 4.15 | 6.51 | 5.59 | 5.06  |
| 10.75 | 9.81  | 6.7  | 7.27 | 7.62  | 3.38 | 6.61 | 5.9  | 9.47  |
| 11.47 | 10.13 | 3.97 | 6.42 | 7.85  | 5.81 | 6.84 | 3.76 | 10.42 |
| 10.79 | 10.15 | 6.93 | 7.59 | 8.23  | 5.93 | 6.03 | 6.27 | 9     |
| 10.07 | 9.98  | 5.2  | 7.33 | 8.77  | 5.95 | 6.3  | 1    | 4.85  |
| 10.45 | 9.95  | 4.57 | 6.16 | 5.8   | 5.52 | 7.33 | 5.67 | 9.02  |
| 10.36 | 9.97  | 6.54 | 7.12 | 7.18  | 6.77 | 6.38 | 3.98 | 7.94  |
| 10.18 | 10.08 | 5.97 | 6.76 | 7.47  | 3.39 | 7.16 | 2.51 | 9.06  |
| 10.32 | 10.16 | 4    | 5.4  | 4.54  | 2.35 | 6.33 | 6.5  | 8.67  |
| 10.57 | 10.21 | 2.48 | 5.36 | 3.57  | 3.57 | 7.03 | 3.06 | 8.96  |
| 10.33 | 10    | 6.96 | 7.52 | 6.69  | 3.43 | 6.11 | 6.81 | 8.93  |
| 10.64 | 10.06 | 6.29 | 7.16 | 6.36  | 2.93 | 5.93 | 6.39 | 9.02  |
| 11.54 | 11.34 | 6.85 | 8.32 | 9.58  | 5.15 | 6.15 | 6.15 | 7.61  |
| 9.54  | 9.16  | 3.82 | 7.1  | 7.87  | 2.95 | 6.38 | 2.95 | 5.41  |
| 9.44  | 8.82  | 3.96 | 7.48 | 5.74  | 0.79 | 6.18 | 5.43 | 8.12  |
| 10.16 | 8.77  | 3.22 | 6.6  | 5.35  | 2.57 | 7.62 | 3.76 | 6.6   |
| 10.17 | 9.01  | 5.07 | 7.03 | 6.22  | 2.9  | 7.15 | 2.9  | 7.63  |
| 5.46  | 8.15  | 7.66 | 7.73 | 1.76  | 2.76 | 4.93 | 7.51 | 7.12  |
| 7.45  | 8.19  | 7.43 | 7.26 | 4.04  | 2.72 | 5.24 | 7.41 | 7.16  |
| 0.88  | 7.88  | 7.47 | 7.73 | 0.88  | 0.88 | 5.97 | 7.5  | 7.7   |
| 4.13  | 7.89  | 7.24 | 7.7  | 3.28  | 1.96 | 5.71 | 7.71 | 6.84  |
| 8.36  | 8.55  | 6.07 | 6.39 | 6.24  | 1.94 | 5.57 | 6.48 | 8.28  |
| 7.66  | 8.39  | 6.81 | 7    | 5.12  | 3.66 | 5.47 | 7.08 | 8.1   |
| 7.85  | 8.19  | 6.84 | 6.97 | 4.16  | 3.23 | 4.98 | 6.79 | 8.53  |
| 7.97  | 8.46  | 6.75 | 6.72 | 5.05  | 3.69 | 5    | 6.66 | 7.91  |
| 10.14 | 10.35 | 4.44 | 7.17 | 10.06 | 0.35 | 6.62 | 2.35 | 2.35  |
| 11.16 | 10.46 | 5.55 | 6.92 | 6.11  | 3.78 | 8.4  | 5.46 | 9.15  |
| 10.36 | 10.49 | 0.42 | 7.87 | 7.93  | 5.17 | 6.96 | 3.59 | 8.3   |
| 11.18 | 11.55 | 2.23 | 8.89 | 11.03 | 6.69 | 5.69 | 4.55 | 8.44  |
| 10.7  | 9.59  | 6.56 | 7.53 | 6.49  | 1.18 | 7.3  | 6.12 | 6.83  |
| 10.64 | 11.21 | 5.51 | 8.83 | 10.6  | 6.1  | 5.51 | 6.83 | 5.51  |
| 10.74 | 9.98  | 3.45 | 6.57 | 6.21  | 2.68 | 6.95 | 3.04 | 6.57  |
| 10.83 | 10    | 4.89 | 6.22 | 5.79  | 0.94 | 6.77 | 2.26 | 6.18  |
| 11.39 | 10.16 | 1.68 | 5.68 | 3     | 0.68 | 7.66 | 3.49 | 8.92  |
| 11    | 10.1  | 5.87 | 7.87 | 7.02  | 4.51 | 7    | 5.82 | 8.29  |
| 11.27 | 10.13 | 4.52 | 7.33 | 6.56  | 4.52 | 7.04 | 4.67 | 8.42  |
| 10.61 | 9.94  | 6.93 | 7.74 | 6.7   | 3.72 | 6.26 | 6.7  | 8.67  |
| 9.28  | 10.1  | 3.03 | 6.31 | 7.21  | 0.57 | 6.8  | 2.16 | 8.17  |
| 8.73  | 9.19  | 5.89 | 6.78 | 5.48  | 1.53 | 6.57 | 6.08 | 8.9   |
| 8.46  | 9.15  | 6.36 | 6.74 | 5.45  | 1.42 | 6.28 | 6.45 | 8.66  |

<https://mc.manuscriptcentral.com/gut>

1  
2  
3  
4  
5  
6  
7  
8  
9  
10  
11  
12  
13  
14  
15  
16  
17  
18  
19  
20  
21  
22  
23  
24  
25  
26  
27  
28  
29  
30  
31  
32  
33  
34  
35  
36  
37  
38  
39  
40  
41  
42  
43  
44  
45  
46  
47  
48  
49  
50  
51  
52  
53  
54  
55  
56  
57  
58  
59  
60

|       |       |      |      |      |      |      |      |      |
|-------|-------|------|------|------|------|------|------|------|
| 9.44  | 9.89  | 5.43 | 5.79 | 7.72 | 1.79 | 7.04 | 2.79 | 9.34 |
| 9.77  | 9.5   | 6.65 | 6.77 | 5.49 | 4.27 | 7.05 | 6.14 | 6.59 |
| 9.73  | 9.24  | 5.94 | 6.59 | 3.91 | 3.17 | 8.03 | 6.39 | 8.17 |
| 9.9   | 9.19  | 5.91 | 6.35 | 3.29 | 2.49 | 8.09 | 5.74 | 8.03 |
| 8     | 9.12  | 7.96 | 8.27 | 6.01 | 2.55 | 6.25 | 8.17 | 7.55 |
| 9.77  | 10.06 | 3.15 | 7.01 | 6.53 | 0.57 | 6.5  | 3.02 | 8.93 |
| 9.6   | 9.97  | 1.39 | 6.35 | 5.82 | 0.07 | 7    | 3.07 | 9.86 |
| 9.67  | 10.04 | 1.35 | 6.37 | 5.78 | 0.35 | 6.8  | 3.81 | 9.81 |
| 2.27  | 8.43  | 7.81 | 8.05 | 0.27 | 1.86 | 5.83 | 8.07 | 8.04 |
| 8.44  | 8.85  | 7.01 | 7.44 | 6.09 | 2.13 | 5.87 | 7.3  | 7.84 |
| 9.88  | 10.03 | 5.65 | 6.75 | 8.01 | 4.56 | 6.1  | 2.82 | 7.37 |
| 9.79  | 9.53  | 6.53 | 6.8  | 6.67 | 4.35 | 5.8  | 5.98 | 8.2  |
| 10.1  | 9.89  | 6.53 | 6.68 | 7.39 | 4.39 | 6.3  | 3.62 | 8.75 |
| 9.76  | 9.62  | 7.03 | 6.93 | 6.73 | 4.21 | 5.68 | 5.26 | 7.07 |
| 10.83 | 11.68 | 5.13 | 7.45 | 9.36 | 2.54 | 6.45 | 7.35 | 9.39 |
| 9.91  | 9.59  | 4.26 | 8.24 | 7.3  | 1.8  | 6.01 | 4.75 | 8.08 |
| 9.03  | 8.92  | 6.14 | 7.64 | 6.13 | 2.4  | 5.79 | 6.22 | 7.91 |
| 10.09 | 9.76  | 4.51 | 8.28 | 7.46 | 2.34 | 5.78 | 4.56 | 8.11 |

1  
2  
3  
4  
5  
6  
7  
8  
9  
10  
11  
12  
13  
14  
15  
16  
17  
18  
19  
20  
21  
22  
23  
24  
25  
26  
27  
28  
29  
30  
31  
32  
33  
34  
35  
36  
37  
38  
39  
40  
41  
42  
43  
44  
45  
46  
47  
48  
49  
50  
51  
52  
53  
54  
55  
56  
57  
58  
59  
60

| PRR15L | PRSS22 | PRSS8 | PTEN  | PTGDS | PTGIS | PTGS2 | PTK2 | PTK2B |
|--------|--------|-------|-------|-------|-------|-------|------|-------|
| 7.56   | 8.3    | 7.52  | 8.68  | 9.12  | 7.53  | 7.28  | 5.88 | 8.25  |
| 8.42   | 9.81   | 9.12  | 8.93  | 7.86  | 6.66  | 7.53  | 7.42 | 8.03  |
| 8.11   | 9.87   | 8.71  | 8.89  | 8.51  | 6.33  | 7.13  | 6.93 | 7.77  |
| 8.15   | 10     | 8.84  | 9.45  | 9.94  | 8.89  | 8.99  | 7.74 | 7.77  |
| 8.51   | 9.03   | 9.17  | 7.61  | 8.37  | 7.37  | 9.17  | 2.01 | 7.7   |
| 8.11   | 8.15   | 9.23  | 8.35  | 7.22  | 6.68  | 7.71  | 7.31 | 7.66  |
| 8.36   | 8.6    | 9.51  | 8.62  | 7.6   | 5.98  | 8.2   | 7.37 | 7.86  |
| 8.36   | 9.34   | 10.31 | 8.93  | 9.01  | 7.77  | 7.42  | 7.73 | 8.28  |
| 6.98   | 9.37   | 10.12 | 8.89  | 8.56  | 9.21  | 4.61  | 7.33 | 8.06  |
| 8.64   | 9.19   | 9.13  | 8.85  | 6.38  | 6.74  | 6.52  | 7.39 | 7.27  |
| 8.75   | 9.03   | 9.62  | 9.35  | 7.63  | 6.81  | 5.81  | 7.68 | 8.06  |
| 8.28   | 9.64   | 9.19  | 9.17  | 7.84  | 8.71  | 6.07  | 7.9  | 7.87  |
| 8.79   | 7.36   | 8.9   | 8.59  | 7.87  | 7.17  | 7.55  | 8.24 | 7.78  |
| 8.36   | 7.46   | 8.6   | 9.04  | 8.51  | 7.07  | 8.15  | 8.48 | 7.95  |
| 8.28   | 8.9    | 8.38  | 9.35  | 13.01 | 10.07 | 5.58  | 9.01 | 8.69  |
| 8.43   | 9.11   | 8.59  | 9.08  | 9.46  | 8.14  | 8.25  | 7.48 | 8.49  |
| 9.1    | 10.13  | 9.06  | 9.2   | 8.54  | 8.15  | 7.57  | 7.89 | 7.83  |
| 9.19   | 9.01   | 8.8   | 8.8   | 7.42  | 8.92  | 7.88  | 7.82 | 7.45  |
| 8.23   | 8.96   | 8.29  | 9.64  | 11.17 | 8.51  | 6.13  | 7.94 | 9.51  |
| 8.76   | 8.55   | 9.03  | 9.44  | 8.93  | 6.93  | 6.17  | 8.11 | 8.63  |
| 7.62   | 7.9    | 7.8   | 9.57  | 9.87  | 8.39  | 6.67  | 7.86 | 8.94  |
| 10.05  | 10.21  | 9.88  | 10.13 | 10.15 | 8.32  | 7.41  | 8.82 | 8.01  |
| 10.05  | 10.1   | 9.85  | 10.22 | 11.09 | 7.5   | 7.78  | 8.94 | 7.99  |
| 9.12   | 10.31  | 9.81  | 10.04 | 9.57  | 8.55  | 8.11  | 8.74 | 7.88  |
| 5.13   | 3.23   | 7.55  | 8.8   | 6.95  | 8.6   | 4.51  | 9.2  | 7.45  |
| 9.61   | 7.48   | 8.71  | 9.46  | 7.15  | 6.17  | 6.28  | 8.46 | 7.76  |
| 9.73   | 7.43   | 9.06  | 9.49  | 6.98  | 6.38  | 6.04  | 8.51 | 7.81  |
| 9.22   | 8.31   | 8.89  | 9.07  | 7.2   | 6.76  | 7.5   | 7.83 | 7.98  |
| 8.63   | 8.93   | 9.5   | 8.73  | 8.26  | 6.76  | 7.2   | 7.3  | 7.84  |
| 8.51   | 9.34   | 9.44  | 8.84  | 8.01  | 7.38  | 8.36  | 7.34 | 7.91  |
| 8.71   | 9.54   | 9.61  | 8.94  | 6.59  | 7.14  | 7.94  | 7.49 | 7.4   |
| 8.53   | 9.4    | 9.46  | 8.96  | 8.49  | 8.05  | 7.74  | 6.73 | 7.92  |
| 5.95   | 7      | 7.26  | 8.96  | 10.79 | 6.35  | 8.57  | 6.46 | 9.81  |
| 8.55   | 8.01   | 8.76  | 9.57  | 6.89  | 8.4   | 7.4   | 8.42 | 7.97  |
| 9.62   | 7.95   | 9.12  | 9.54  | 7.01  | 7.71  | 8.33  | 8.54 | 8.14  |
| 9      | 7.91   | 8.97  | 9.4   | 8.53  | 8.99  | 5.9   | 8.32 | 8.09  |
| 7.33   | 6.57   | 5.53  | 9.05  | 10.48 | 4.9   | 6.4   | 7.02 | 8.74  |
| 8.27   | 7.68   | 6.9   | 9.39  | 8.1   | 6.38  | 7.55  | 7.13 | 8.16  |
| 6.78   | 5.98   | 5.12  | 8.97  | 9.18  | 7.32  | 6.22  | 6.87 | 8.46  |
| 6.98   | 6.24   | 5.5   | 8.92  | 9.72  | 7.41  | 4.99  | 6.81 | 8.54  |
| 7.37   | 7.42   | 7.72  | 7.89  | 8.29  | 7.61  | 7.25  | 6.44 | 7.43  |
| 7.36   | 7.74   | 7.89  | 7.89  | 6.89  | 6.95  | 7.16  | 6.89 | 6.87  |
| 7.35   | 7.22   | 7.8   | 7.59  | 7.2   | 6.43  | 7.24  | 6.8  | 6.85  |
| 7.6    | 7.27   | 7.99  | 7.65  | 6.89  | 6.41  | 6.83  | 7.31 | 6.94  |
| 8.32   | 9.2    | 10.06 | 6.56  | 10.34 | 9.22  | 2.86  | 7.25 | 7.61  |
| 9.22   | 7.33   | 8.17  | 8.9   | 9.59  | 6.5   | 4.02  | 7.8  | 7.64  |
| 9.18   | 7.2    | 7.33  | 8.89  | 9.3   | 7.05  | 4     | 7.71 | 7.19  |
| 8.54   | 6.98   | 6.93  | 9     | 7.99  | 8.64  | 3.9   | 7.69 | 7.6   |
| 8.87   | 8.67   | 9.67  | 9.03  | 9.05  | 9.14  | 6.36  | 8.74 | 8.91  |
| 8.15   | 8.68   | 8.98  | 8.75  | 6.84  | 7.56  | 8.74  | 8.88 | 8.3   |
| 7.86   | 7.98   | 8.75  | 9.41  | 7.25  | 6.11  | 7.21  | 8.98 | 8.65  |

<https://mc.manuscriptcentral.com/gut>



|    |       |       |       |       |       |      |       |      |      |
|----|-------|-------|-------|-------|-------|------|-------|------|------|
| 1  |       |       |       |       |       |      |       |      |      |
| 2  | 7.72  | 8.24  | 8.6   | 9.14  | 8.16  | 9    | 7.61  | 8.97 | 8.57 |
| 3  | 8.85  | 8.58  | 10.32 | 8.66  | 8.04  | 8.14 | 7     | 9.21 | 7.96 |
| 4  | 8.6   | 9.24  | 9.89  | 9.04  | 6.68  | 6.92 | 7.71  | 9.32 | 8.02 |
| 5  | 8.95  | 9.36  | 9.92  | 9.01  | 6.64  | 7.02 | 7.02  | 9.15 | 7.86 |
| 6  | 8.64  | 8.85  | 9.75  | 8.86  | 6.79  | 7.97 | 7.24  | 9.21 | 8.16 |
| 7  | 8.88  | 6.75  | 8.04  | 9.75  | 10.21 | 6.32 | 5.87  | 8.1  | 9.39 |
| 8  | 9.26  | 9.05  | 8.91  | 9.8   | 8.61  | 6.38 | 5.57  | 8.56 | 8.89 |
| 9  | 9.8   | 8.72  | 9.16  | 9.65  | 6.22  | 3.86 | 4.46  | 9    | 9.08 |
| 10 | 9.2   | 9.36  | 9.35  | 9.61  | 7.3   | 8.35 | 5.19  | 8.83 | 9.18 |
| 11 | 8.98  | 8.57  | 9.49  | 8.37  | 6.15  | 6.74 | 3.83  | 8.93 | 9.81 |
| 12 | 8.67  | 8.53  | 9.48  | 9.11  | 8.55  | 6.69 | 6.24  | 8.62 | 9.13 |
| 13 | 8.96  | 8.8   | 9.4   | 8.91  | 7.04  | 6.4  | 5.27  | 9.1  | 8.83 |
| 14 | 8.85  | 8.28  | 9.34  | 9.1   | 7.73  | 7.71 | 4.68  | 8.75 | 8.98 |
| 15 | 8.61  | 12.09 | 11.03 | 8.85  | 12.41 | 7.15 | 12.16 | 7.47 | 7.74 |
| 16 | 7.67  | 10.38 | 9.4   | 8.66  | 9.38  | 7.73 | 9.78  | 6.62 | 8.55 |
| 17 | 7.35  | 8.93  | 8.32  | 8.66  | 7.95  | 7.07 | 8.55  | 6.22 | 8.35 |
| 18 | 9     | 10.47 | 10.21 | 8.08  | 8.38  | 8.42 | 10.84 | 0.24 | 9.15 |
| 19 | 9.33  | 10.24 | 10    | 7.27  | 9.95  | 8.63 | 10.36 | 0.77 | 9.1  |
| 20 | 8.75  | 9.73  | 9.03  | 9.04  | 5.78  | 6.12 | 6.96  | 8.42 | 9.06 |
| 21 | 8.9   | 9.98  | 9.4   | 9.07  | 6.03  | 5.83 | 7.01  | 8.6  | 9.22 |
| 22 | 8.61  | 9.63  | 8.94  | 8.96  | 7.71  | 6.77 | 6.99  | 8.15 | 9.04 |
| 23 | 8.59  | 8.8   | 9.63  | 10.3  | 8.84  | 7.53 | 7.38  | 8.72 | 8.55 |
| 24 | 8.55  | 8.73  | 9.42  | 10.07 | 8.79  | 7.39 | 7.14  | 8.74 | 8.24 |
| 25 | 8.69  | 7.78  | 8.82  | 10.27 | 6.72  | 8.7  | 7.53  | 8.37 | 7.54 |
| 26 | 9.76  | 9.66  | 9.94  | 10    | 8.92  | 6.87 | 7.25  | 8.67 | 9.18 |
| 27 | 9.7   | 10.25 | 9.55  | 10.12 | 7.94  | 7.27 | 8.42  | 8.68 | 8.44 |
| 28 | 9.83  | 10    | 9.19  | 10.04 | 8.92  | 8.71 | 7.8   | 8.64 | 8.44 |
| 29 | 9.08  | 8.15  | 8.05  | 9.09  | 7.35  | 7.05 | 7.8   | 8.39 | 8.05 |
| 30 | 9.02  | 7.9   | 7.85  | 9.03  | 6.5   | 7.23 | 7.9   | 8.35 | 7.75 |
| 31 | 9.22  | 7.87  | 8.07  | 9.04  | 7.83  | 7.85 | 7.4   | 8.28 | 8.13 |
| 32 | 9.33  | 9.23  | 8.84  | 9.31  | 7.71  | 8.55 | 8.03  | 8.21 | 8.74 |
| 33 | 9.33  | 9.23  | 9.38  | 9.15  | 7.2   | 7.25 | 7.68  | 8.4  | 8.78 |
| 34 | 9.64  | 9.41  | 9.58  | 8.97  | 7.52  | 7.16 | 8.02  | 8.07 | 8.98 |
| 35 | 8.28  | 9.35  | 8.43  | 9.07  | 7.46  | 7.21 | 8.4   | 7.88 | 8.08 |
| 36 | 9.23  | 9.58  | 9.02  | 9.19  | 7.54  | 6.95 | 8.43  | 7.78 | 8.29 |
| 37 | 8.07  | 9.59  | 8.75  | 9.17  | 8.43  | 8.83 | 8.71  | 7.88 | 8.25 |
| 38 | 8.45  | 9.1   | 8.57  | 8.9   | 9.41  | 8.15 | 7.61  | 7.18 | 8.51 |
| 39 | 8.45  | 9.1   | 8.57  | 8.9   | 9.41  | 8.15 | 7.61  | 7.18 | 8.51 |
| 40 | 9.43  | 10.08 | 10    | 8.82  | 7.79  | 7.85 | 7.88  | 7.93 | 7.54 |
| 41 | 8.94  | 9.65  | 9.46  | 8.82  | 8.8   | 8.32 | 8.23  | 7.64 | 7.57 |
| 42 | 9.2   | 9.53  | 9.5   | 9.06  | 7.09  | 9.3  | 7.91  | 7.88 | 7.57 |
| 43 | 7.98  | 8.69  | 8.44  | 8.36  | 9.48  | 6.64 | 8.02  | 6.08 | 8.8  |
| 44 | 8.87  | 9.84  | 9.44  | 8.78  | 7.45  | 7.95 | 8.94  | 7.47 | 7.84 |
| 45 | 10.05 | 10.31 | 9.74  | 8.61  | 6.77  | 7.49 | 8.07  | 7.18 | 7.91 |
| 46 | 8.83  | 9.4   | 9     | 8.44  | 8.54  | 8    | 8     | 6.34 | 7.78 |
| 47 | 9.68  | 9.42  | 10.23 | 9.1   | 7.64  | 7.9  | 7.91  | 8.74 | 8.48 |
| 48 | 9.97  | 10.14 | 10.61 | 9.14  | 6.78  | 6.36 | 7.03  | 8.86 | 8.48 |
| 49 | 9.41  | 9.75  | 10.28 | 8.99  | 9.06  | 7.7  | 6.35  | 8.41 | 8.57 |
| 50 | 7.57  | 8.47  | 7.62  | 8.37  | 9.32  | 7.54 | 7.61  | 6.2  | 8.89 |
| 51 | 7.7   | 8.53  | 7.93  | 8.9   | 9.13  | 8.31 | 7.81  | 6.67 | 7.54 |
| 52 | 7.7   | 8.48  | 7.88  | 8.88  | 7.89  | 8.31 | 7.52  | 6.72 | 7.66 |
| 53 | 8.68  | 8.44  | 8.41  | 7.72  | 7.37  | 6.46 | 7.69  | 6.86 | 7.94 |

<https://mc.manuscriptcentral.com/gut>

1  
2  
3  
4  
5  
6  
7  
8  
9  
10  
11  
12  
13  
14  
15  
16  
17  
18  
19  
20  
21  
22  
23  
24  
25  
26  
27  
28  
29  
30  
31  
32  
33  
34  
35  
36  
37  
38  
39  
40  
41  
42  
43  
44  
45  
46  
47  
48  
49  
50  
51  
52  
53  
54  
55  
56  
57  
58  
59  
60

|      |       |       |      |       |      |       |      |      |
|------|-------|-------|------|-------|------|-------|------|------|
| 8.72 | 8.86  | 8.56  | 8.16 | 6.78  | 6.41 | 8.31  | 7.11 | 7.66 |
| 8.19 | 8.84  | 8.49  | 7.85 | 7.82  | 7.98 | 8.83  | 5.45 | 7.88 |
| 8.35 | 8.18  | 7.71  | 9.36 | 10.38 | 7.58 | 7.87  | 7.58 | 9.32 |
| 8.56 | 9.77  | 9.29  | 9.75 | 9.74  | 8.76 | 7.5   | 7.54 | 8.48 |
| 8.76 | 9.04  | 9.03  | 9.83 | 8.83  | 9.91 | 6.58  | 7.63 | 8.12 |
| 7.68 | 7.82  | 7.68  | 8.92 | 10.97 | 8.7  | 7.86  | 7.24 | 8.92 |
| 9.23 | 7.46  | 8.53  | 8.22 | 4.5   | 5.53 | 7.1   | 7.74 | 7.6  |
| 8.95 | 7.88  | 8.35  | 8.06 | 6.11  | 6.87 | 6.78  | 7.88 | 7.56 |
| 8.6  | 9.66  | 9.43  | 8.52 | 10.45 | 9.28 | 7.95  | 7.2  | 7.3  |
| 8.9  | 9.59  | 10.27 | 8.51 | 9.77  | 8.19 | 6.6   | 7.22 | 8.8  |
| 9.15 | 10.01 | 9.88  | 8.98 | 6.9   | 6.95 | 6.4   | 7.78 | 7.31 |
| 8.79 | 9.21  | 9.43  | 8.4  | 5.51  | 6.46 | 7.1   | 7.26 | 7.36 |
| 8.64 | 11.29 | 10.32 | 8.88 | 9.6   | 9.78 | 7.21  | 7.85 | 7.35 |
| 8.75 | 9.22  | 9.04  | 7.83 | 7.82  | 8.87 | 9.44  | 0    | 8.5  |
| 8.51 | 8.79  | 8.7   | 9.01 | 5.12  | 5.59 | 6.03  | 8.77 | 8.28 |
| 8.52 | 8.97  | 8.65  | 9.27 | 5.74  | 4.74 | 6.4   | 8.9  | 8.05 |
| 8.66 | 8.76  | 8.58  | 9.11 | 6.47  | 6.77 | 5.33  | 8.87 | 8.16 |
| 7.53 | 9.2   | 8.98  | 9.44 | 8.16  | 4.68 | 4.99  | 8.03 | 9.43 |
| 6.46 | 8.48  | 8.2   | 8.81 | 7.73  | 6.33 | 6.65  | 7.24 | 8.75 |
| 6    | 8.93  | 8.56  | 9.15 | 8.47  | 6.93 | 6.25  | 7.7  | 9.08 |
| 6.16 | 11.27 | 10.69 | 7.16 | 14.14 | 9.33 | 8.75  | 5.16 | 6.75 |
| 8.83 | 9.5   | 9.44  | 8.85 | 6.63  | 6.03 | 7.71  | 7.71 | 7.8  |
| 8.59 | 8.97  | 9.21  | 8.89 | 8.87  | 6.93 | 4.71  | 7.52 | 8.6  |
| 9.04 | 10.08 | 9.82  | 8.8  | 9.36  | 8.17 | 6.5   | 6.85 | 7.59 |
| 8.89 | 10.37 | 9.77  | 9.1  | 11.15 | 8.68 | 6.12  | 7.19 | 7.76 |
| 7.89 | 9.35  | 8.42  | 9.49 | 8.61  | 9.94 | 6.32  | 7    | 8.23 |
| 8.06 | 8.82  | 8.83  | 7.8  | 8.36  | 7.79 | 8.33  | 3    | 7.66 |
| 8.32 | 8.35  | 8.28  | 7.53 | 7.05  | 7.22 | 8.49  | 0.86 | 7.96 |
| 8.43 | 8.12  | 7.74  | 7.67 | 7.38  | 7.26 | 8.35  | 3.77 | 7.92 |
| 7.61 | 8.18  | 7.46  | 8.75 | 8.4   | 8.2  | 6.12  | 6.67 | 7.59 |
| 6.53 | 7.61  | 6.66  | 8.53 | 7.82  | 9.1  | 6.67  | 6.73 | 5.02 |
| 7.88 | 8.62  | 8.28  | 8.57 | 8.81  | 8.26 | 6.55  | 6.15 | 6.66 |
| 6.18 | 7.9   | 6.58  | 9.02 | 8.01  | 9.92 | 8.21  | 6.63 | 7.19 |
| 7.53 | 8.16  | 7.96  | 6.84 | 9.54  | 7.19 | 7.68  | 0.45 | 7.28 |
| 7.36 | 7.62  | 8.12  | 7.11 | 6.08  | 6.63 | 7.19  | 3.71 | 7.39 |
| 7.21 | 7.81  | 8.27  | 7.04 | 6.35  | 6.79 | 7.04  | 4.84 | 7.23 |
| 7.86 | 8.76  | 8.71  | 6.83 | 6.49  | 7.54 | 8.85  | 0    | 7.92 |
| 7.4  | 7.64  | 7.38  | 6.79 | 7.94  | 6.42 | 7.48  | 2.34 | 7.4  |
| 7.47 | 7.64  | 7.47  | 7    | 7.52  | 6.68 | 7.16  | 1.1  | 7.05 |
| 7.6  | 7.44  | 7.44  | 7.1  | 7.65  | 6.79 | 7.39  | 2.89 | 7.23 |
| 8.32 | 10.03 | 9.85  | 5.58 | 8.05  | 6.87 | 10.73 | 2.41 | 7.46 |
| 8.11 | 8.45  | 8.42  | 7.78 | 8.92  | 7.77 | 8.57  | 3.06 | 7.84 |
| 8.73 | 8.76  | 8.66  | 8.11 | 6.71  | 7.91 | 8.77  | 0.91 | 8.19 |
| 7.93 | 8.49  | 9.18  | 8.3  | 7.26  | 7.13 | 7.82  | 6.15 | 7.74 |
| 7.99 | 8.45  | 8.55  | 7.85 | 6.82  | 7.6  | 8.35  | 4.07 | 7.72 |
| 7.84 | 7.93  | 8.24  | 8.07 | 9.87  | 7.61 | 8.28  | 5.55 | 7.7  |
| 8.37 | 8.49  | 8.56  | 7.76 | 8.63  | 7.75 | 8.7   | 3.46 | 7.56 |
| 8.41 | 8.36  | 8.01  | 8.15 | 5.95  | 6.79 | 8.95  | 1.71 | 7.71 |
| 8.33 | 8.64  | 8.95  | 7.7  | 8.22  | 8.85 | 9.36  | 2.22 | 8.31 |
| 8.15 | 7.34  | 7.69  | 8.29 | 7.08  | 7.48 | 6.47  | 7.93 | 7.37 |
| 7.92 | 7.26  | 7.68  | 7.94 | 5.33  | 6.63 | 7.42  | 8.43 | 7.28 |
| 7.76 | 7.4   | 7.74  | 8.03 | 6.71  | 7.45 | 7.51  | 8.27 | 7.21 |

<https://mc.manuscriptcentral.com/gut>

1  
2  
3  
4  
5  
6  
7  
8  
9  
10  
11  
12  
13  
14  
15  
16  
17  
18  
19  
20  
21  
22  
23  
24  
25  
26  
27  
28  
29  
30  
31  
32  
33  
34  
35  
36  
37  
38  
39  
40  
41  
42  
43  
44  
45  
46  
47  
48  
49  
50  
51  
52  
53  
54  
55  
56  
57  
58  
59  
60

|       |       |       |      |       |       |      |      |       |
|-------|-------|-------|------|-------|-------|------|------|-------|
| 7.75  | 6.82  | 7.86  | 8.02 | 7.41  | 7.63  | 7.11 | 7.79 | 7.55  |
| 8.9   | 9.3   | 9.59  | 9.63 | 9.14  | 8.36  | 8.49 | 8.02 | 8.53  |
| 8.96  | 9.28  | 9.57  | 9.67 | 8.54  | 7.73  | 8.89 | 8.02 | 8.34  |
| 9.33  | 10.03 | 9.73  | 9.38 | 6.6   | 6.03  | 9.29 | 8.16 | 7.7   |
| 9.35  | 10.18 | 9.78  | 9.39 | 6.89  | 6.13  | 9.56 | 8.22 | 7.8   |
| 8.18  | 8.59  | 8.51  | 8.91 | 9.48  | 8.45  | 7.85 | 7.74 | 9.1   |
| 9.5   | 10.01 | 9.79  | 9.18 | 10.94 | 8.27  | 6.84 | 8.32 | 8.69  |
| 9.13  | 9.99  | 9.56  | 9.08 | 9.48  | 7.43  | 7.55 | 8.37 | 8.76  |
| 8.67  | 9.34  | 8.85  | 9.32 | 11.6  | 10.02 | 7.3  | 8.05 | 8.7   |
| 10.08 | 10.11 | 10.48 | 9.58 | 7.09  | 8.62  | 6.01 | 8.62 | 8.95  |
| 9.17  | 8.67  | 9.19  | 9.57 | 7.84  | 8.43  | 6.05 | 7.97 | 8.55  |
| 9.11  | 9.11  | 9.56  | 9.52 | 7     | 8.15  | 9.02 | 8.13 | 8.46  |
| 9.52  | 8.91  | 9.64  | 9.54 | 6.86  | 8.71  | 5.9  | 8.4  | 8.39  |
| 8.63  | 9.16  | 9.12  | 8.89 | 7.78  | 6.8   | 6.61 | 7.12 | 8.55  |
| 9.23  | 10.03 | 9.59  | 9.41 | 7.59  | 6.03  | 6.37 | 7.94 | 8.58  |
| 7.58  | 9.36  | 8.21  | 8.95 | 9     | 8.93  | 7.75 | 7.15 | 7.85  |
| 7.19  | 7.37  | 5.32  | 9.68 | 10.86 | 8.45  | 7.09 | 7.38 | 9.2   |
| 9.42  | 8.47  | 7.96  | 9.4  | 9.31  | 7.54  | 6.8  | 7.78 | 7.88  |
| 7.92  | 8.63  | 6.98  | 9.46 | 7.77  | 7.9   | 5.73 | 7.74 | 7.84  |
| 9.07  | 8.31  | 8.35  | 8.94 | 9.54  | 8.44  | 4.57 | 8.29 | 9.28  |
| 8.8   | 7.36  | 8.83  | 9.22 | 7.39  | 5.77  | 8.31 | 8.67 | 7.03  |
| 9.36  | 8.7   | 9.01  | 8.99 | 6.12  | 5.06  | 6.53 | 8.94 | 6.9   |
| 8.68  | 9.39  | 9.49  | 8.79 | 9     | 7.71  | 7.76 | 6.32 | 8.35  |
| 9.11  | 9.62  | 9.95  | 8.75 | 8.37  | 7.81  | 7.25 | 7.08 | 8.01  |
| 8.47  | 11.09 | 10.66 | 8.79 | 11.13 | 10.93 | 8.88 | 6.74 | 7.74  |
| 6.99  | 6.32  | 6.75  | 8.34 | 10.69 | 5.85  | 4.89 | 7.47 | 8.34  |
| 7.17  | 7.2   | 7.7   | 8.44 | 9.09  | 6.57  | 6.28 | 7.41 | 7.73  |
| 8.13  | 7.24  | 7.86  | 7.75 | 6.21  | 5.89  | 5.35 | 8.1  | 7.26  |
| 6.9   | 6.9   | 6.22  | 8.33 | 8.42  | 8.13  | 7.6  | 7.48 | 6.36  |
| 7.51  | 7.51  | 7.76  | 7.04 | 6.01  | 6.89  | 7.37 | 1.76 | 7.46  |
| 7.6   | 7.63  | 7.73  | 7.33 | 6.85  | 6.47  | 7.39 | 3.72 | 6.85  |
| 7.61  | 7.5   | 7.45  | 7.34 | 6.05  | 6.47  | 7.92 | 0.88 | 7.38  |
| 7.4   | 7.15  | 7.45  | 6.84 | 6.31  | 6.81  | 7.37 | 1.96 | 7.22  |
| 8.04  | 7.85  | 8.32  | 7.69 | 7.68  | 6.35  | 6.58 | 5.61 | 6.99  |
| 7.85  | 7.59  | 8.14  | 7.67 | 8.23  | 7.21  | 6.93 | 5.36 | 6.71  |
| 7.74  | 7.52  | 8.1   | 7.79 | 6.55  | 7.23  | 7.14 | 5.81 | 6.97  |
| 7.17  | 7.54  | 7.67  | 7.86 | 7.14  | 8.02  | 7.06 | 5.71 | 6.77  |
| 1.94  | 4.16  | 1.35  | 9.56 | 11.49 | 5.44  | 6.97 | 7.28 | 10.25 |
| 9.55  | 7.22  | 10.66 | 8.09 | 9.03  | 7.05  | 7.11 | 7.67 | 7.29  |
| 8.31  | 8.13  | 8.84  | 9.3  | 8.72  | 5.42  | 6.37 | 8.01 | 8.61  |
| 7.69  | 9.54  | 8.85  | 8.99 | 12.96 | 8.26  | 6.55 | 7.44 | 8.64  |
| 8.89  | 7.8   | 9.5   | 8.8  | 8.9   | 8.72  | 6.55 | 8.43 | 8.2   |
| 7.97  | 8.68  | 7.83  | 8.6  | 13.04 | 8.97  | 6.51 | 7.97 | 9.1   |
| 8.75  | 7.35  | 8.95  | 9.26 | 9.53  | 7.15  | 4.39 | 8.08 | 7.95  |
| 8.34  | 6.84  | 9.32  | 9.33 | 7.26  | 8.09  | 5.91 | 8.17 | 7.54  |
| 10.37 | 8.92  | 10.15 | 8.65 | 4.38  | 7.17  | 2.27 | 8.69 | 7.94  |
| 9.54  | 8.32  | 9.28  | 8.67 | 8.18  | 7.85  | 6.98 | 7.93 | 7.97  |
| 9.42  | 8.58  | 9.32  | 8.67 | 8.26  | 8.04  | 5.89 | 8.06 | 7.68  |
| 8.87  | 8.33  | 8.74  | 8.41 | 8.35  | 8.04  | 6.78 | 8.03 | 7.77  |
| 6.7   | 7.27  | 6.95  | 9.06 | 9.08  | 7.72  | 7.22 | 7.42 | 7.71  |
| 6.95  | 7.07  | 6.72  | 8.51 | 7.98  | 7.32  | 6.53 | 7.1  | 7.21  |
| 6.75  | 7.34  | 6.68  | 8.19 | 8.51  | 7.05  | 6.85 | 7.05 | 7.24  |

<https://mc.manuscriptcentral.com/gut>

1  
2  
3  
4  
5  
6  
7  
8  
9  
10  
11  
12  
13  
14  
15  
16  
17  
18  
19  
20  
21  
22  
23  
24  
25  
26  
27  
28  
29  
30  
31  
32  
33  
34  
35  
36  
37  
38  
39  
40  
41  
42  
43  
44  
45  
46  
47  
48  
49  
50  
51  
52  
53  
54  
55  
56  
57  
58  
59  
60

|      |       |       |      |       |      |      |      |      |
|------|-------|-------|------|-------|------|------|------|------|
| 6.11 | 7     | 6.46  | 8.59 | 8.42  | 8.61 | 6.18 | 7.64 | 7.04 |
| 7.44 | 7.98  | 7.17  | 7.61 | 7.19  | 9.76 | 6.31 | 5.96 | 7.44 |
| 7.16 | 7.43  | 8.54  | 8.24 | 7.73  | 6.05 | 7.86 | 6.94 | 6.23 |
| 7.41 | 7.32  | 8.72  | 8.33 | 7.6   | 5.53 | 5.7  | 7.07 | 6.86 |
| 7.53 | 7.86  | 8.51  | 6.8  | 8.85  | 7.89 | 7.6  | 3.14 | 7.01 |
| 7.22 | 7.36  | 7.9   | 8.72 | 7.52  | 7.89 | 6.96 | 7.39 | 8.15 |
| 8.01 | 7.71  | 8.19  | 8.7  | 5.81  | 5.75 | 5.44 | 6.97 | 7.71 |
| 7.83 | 7.95  | 8.09  | 8.75 | 5.52  | 5.52 | 5.56 | 6.87 | 7.75 |
| 7.9  | 8.05  | 7.75  | 7.36 | 5.94  | 7.36 | 7.92 | 0.27 | 7.44 |
| 7.07 | 7.57  | 7.96  | 8.21 | 8.88  | 6.98 | 7.38 | 5.91 | 7.56 |
| 8.35 | 7.3   | 8.09  | 9.47 | 9.83  | 7.93 | 5.46 | 7.69 | 8.64 |
| 8.4  | 8.02  | 8.34  | 8.91 | 8.93  | 7.53 | 6.17 | 7.32 | 7.77 |
| 8.27 | 7.88  | 8.74  | 9.12 | 9.72  | 8.28 | 5.83 | 7.38 | 8.31 |
| 7.36 | 7.57  | 7.34  | 9.15 | 8.87  | 9.45 | 6.19 | 7.33 | 8.24 |
| 8.69 | 10.11 | 10.14 | 7.79 | 10.36 | 9.44 | 7.07 | 4.54 | 6.79 |
| 8.09 | 7.78  | 9.73  | 7.73 | 10.19 | 8.04 | 6.88 | 6.16 | 8    |
| 7.39 | 7.17  | 7.8   | 7.86 | 9.03  | 7.23 | 6.73 | 6.04 | 8.02 |
| 8.15 | 8.15  | 10    | 7.76 | 10.51 | 8.28 | 6.7  | 6.09 | 7.98 |

1  
2  
3  
4  
5  
6  
7  
8  
9  
10  
11  
12  
13  
14  
15  
16  
17  
18  
19  
20  
21  
22  
23  
24  
25  
26  
27  
28  
29  
30  
31  
32  
33  
34  
35  
36  
37  
38  
39  
40  
41  
42  
43  
44  
45  
46  
47  
48  
49  
50  
51  
52  
53  
54  
55  
56  
57  
58  
59  
60

| PTK6  | PTPRB | PTPRC | PTPRM | PTRF  | PTTG1 | PTX3 | PXDN | PYCARD |
|-------|-------|-------|-------|-------|-------|------|------|--------|
| 7.59  | 5.9   | 7.97  | 6.73  | 7.73  | 8.9   | 6.44 | 6.04 | 7.44   |
| 8.79  | 6.42  | 6.85  | 7.01  | 7.12  | 8.63  | 4.79 | 8.14 | 7.24   |
| 8.82  | 6.59  | 6.89  | 6.64  | 7.25  | 8.83  | 5.47 | 7.33 | 7.45   |
| 8.96  | 6.95  | 6.78  | 7.25  | 7.33  | 7.79  | 6.2  | 8.41 | 7.38   |
| 8.23  | 6.56  | 7.08  | 7.61  | 10.01 | 9.75  | 7.85 | 2.59 | 9.23   |
| 7.5   | 5.97  | 7.25  | 7.13  | 7.16  | 8.76  | 5.95 | 7.33 | 8.29   |
| 7.47  | 5.87  | 7.45  | 7.13  | 7.18  | 8.78  | 5.98 | 8.05 | 8.35   |
| 8.25  | 5.98  | 7.43  | 6.75  | 7.24  | 8.72  | 4.39 | 8.27 | 10.43  |
| 7.5   | 6.04  | 7.77  | 6.32  | 7.64  | 8.9   | 5.54 | 7.82 | 7.83   |
| 7.89  | 5.58  | 6.34  | 6.14  | 6.77  | 9.1   | 5    | 6.91 | 7.05   |
| 7.81  | 5.84  | 6.72  | 6.26  | 4.96  | 9.48  | 5.02 | 7.39 | 6.63   |
| 7.17  | 5.81  | 7.24  | 7.02  | 6.38  | 9.09  | 5.73 | 7.98 | 6.87   |
| 8.58  | 5.74  | 6.86  | 6.68  | 6.95  | 9.29  | 5.68 | 7.12 | 8.02   |
| 8.8   | 6.39  | 7.5   | 7.38  | 7.45  | 9.36  | 5.82 | 8.07 | 8.09   |
| 10.58 | 5.35  | 7.65  | 5.35  | 8.18  | 8.78  | 5.77 | 7.7  | 9.69   |
| 6.97  | 6.03  | 8.26  | 6.85  | 7.97  | 9.59  | 6.7  | 7.72 | 7.64   |
| 8.03  | 5.29  | 7.42  | 6.84  | 8.11  | 9.32  | 5.68 | 6.78 | 7.76   |
| 7.75  | 5.46  | 7.05  | 6.74  | 8.72  | 9.4   | 6.62 | 8.04 | 7.74   |
| 7.91  | 6.82  | 9.31  | 6.65  | 7.67  | 8.82  | 6.01 | 7.79 | 9.72   |
| 7.52  | 6.76  | 8.52  | 7.27  | 6.19  | 9.08  | 4.92 | 8.29 | 8.34   |
| 6.81  | 6.98  | 9.33  | 7.64  | 7.05  | 8.94  | 5.8  | 7.86 | 8.52   |
| 7.72  | 6.54  | 6.43  | 7.23  | 7.81  | 9.37  | 4.67 | 8.66 | 8.19   |
| 7.65  | 6.45  | 6.41  | 6.78  | 7.22  | 9.27  | 5.2  | 8.07 | 8.35   |
| 7.67  | 6.43  | 6.2   | 7.39  | 7.23  | 8.75  | 6.34 | 7.71 | 7.94   |
| 6.84  | 4.01  | 7.1   | 6.89  | 5.56  | 8.58  | 3.89 | 7.72 | 6.07   |
| 9.66  | 5.71  | 5.91  | 5.94  | 4.99  | 9.41  | 4.04 | 7.45 | 7.16   |
| 9.71  | 6.07  | 5.98  | 6.3   | 5.69  | 9     | 3.69 | 7.19 | 7.22   |
| 9.53  | 5.85  | 6.86  | 6.32  | 7.32  | 8.79  | 5.64 | 7.02 | 7.32   |
| 8.09  | 5.78  | 7.16  | 6.12  | 7.53  | 9.07  | 5.43 | 6.34 | 7.17   |
| 8.25  | 5.77  | 7.2   | 6.63  | 7.78  | 8.85  | 6.46 | 6.73 | 7.41   |
| 8.7   | 5.87  | 6.3   | 6.37  | 7.73  | 8.79  | 6.03 | 6.46 | 7.24   |
| 8.48  | 6.32  | 7.15  | 6.41  | 8.23  | 9.04  | 6.23 | 6.35 | 7.82   |
| 6.95  | 5.37  | 9.52  | 7.09  | 8.14  | 8.69  | 5.59 | 5.2  | 7.36   |
| 6.6   | 6.45  | 6.53  | 6.84  | 7.07  | 8.14  | 4.7  | 8.7  | 7.39   |
| 7.41  | 6.1   | 6.54  | 6.47  | 7.23  | 8.46  | 4.93 | 9    | 7.87   |
| 7.46  | 5.47  | 6.81  | 6.6   | 7.06  | 8.21  | 5.33 | 8.22 | 8.18   |
| 6.3   | 4.62  | 8.9   | 5.03  | 5.77  | 9.07  | 5.09 | 6.51 | 8.21   |
| 7.1   | 4.65  | 8.46  | 5.43  | 5.53  | 9.85  | 4.26 | 6.96 | 6.72   |
| 6.22  | 4.61  | 8.79  | 5.98  | 6.56  | 9.34  | 3.83 | 6.94 | 7.12   |
| 5.95  | 4.5   | 8.86  | 5.55  | 5.77  | 9.31  | 4.07 | 6.25 | 6.87   |
| 7.5   | 5.76  | 6.93  | 6.63  | 7.49  | 8.45  | 6.41 | 6.74 | 7.64   |
| 7.32  | 5.83  | 6.22  | 7.08  | 7.5   | 8.68  | 6.44 | 6.57 | 7.31   |
| 7.24  | 5.61  | 6.12  | 6.71  | 7.21  | 8.55  | 6.74 | 5.83 | 7.44   |
| 7.15  | 5.06  | 6.17  | 6.04  | 7.22  | 8.43  | 5.43 | 6.37 | 7.66   |
| 2.86  | 4.45  | 4.86  | 6.18  | 6.95  | 8.5   | 3.86 | 6.86 | 8.53   |
| 6.4   | 5.99  | 6.62  | 6.71  | 6.07  | 7.99  | 3.9  | 7.22 | 6.52   |
| 5.93  | 5.91  | 6.51  | 7.44  | 5.13  | 8.05  | 4.86 | 7.73 | 6.47   |
| 5.69  | 6.11  | 6.6   | 7.5   | 5.67  | 7.62  | 4.56 | 7.73 | 6.02   |
| 8.92  | 6.78  | 8.27  | 5.96  | 6.63  | 9.59  | 5.16 | 7.76 | 8.73   |
| 7.8   | 6.2   | 7.63  | 6.72  | 6.68  | 10.13 | 5.33 | 8.63 | 8.48   |
| 7.17  | 5.78  | 7.85  | 6.35  | 6.17  | 10.71 | 3.08 | 7.24 | 8.51   |

<https://mc.manuscriptcentral.com/gut>

|    |      |      |      |      |       |       |      |      |       |
|----|------|------|------|------|-------|-------|------|------|-------|
| 1  |      |      |      |      |       |       |      |      |       |
| 2  | 7.2  | 6.03 | 8.16 | 7.03 | 6.63  | 10.25 | 4.66 | 8.45 | 8.34  |
| 3  | 8.49 | 6.1  | 6.46 | 5.79 | 7.84  | 9.3   | 5.65 | 6.42 | 7.84  |
| 4  | 8.29 | 6.14 | 6.49 | 7.05 | 7.57  | 9.28  | 5.4  | 7.64 | 7.75  |
| 5  | 8.66 | 6.33 | 6.63 | 6.28 | 7.24  | 9.09  | 5.12 | 7.81 | 7.75  |
| 6  | 8.36 | 6.05 | 6.67 | 6.86 | 7.32  | 9.24  | 5.67 | 6.61 | 8.04  |
| 7  | 8.11 | 5.98 | 8.93 | 6.36 | 7.66  | 9.35  | 7.43 | 7.75 | 8.21  |
| 8  | 7.85 | 6.69 | 6.55 | 6.72 | 6.88  | 9.76  | 3.25 | 7.62 | 8.12  |
| 9  | 7.75 | 5.34 | 5.32 | 5.21 | 6.54  | 10.11 | 2.17 | 6.88 | 8.55  |
| 10 | 7.96 | 6.3  | 6.71 | 6.53 | 7.57  | 9.66  | 4.83 | 7.19 | 8.3   |
| 11 | 8    | 4.9  | 6.95 | 5.87 | 5.9   | 10.29 | 2.17 | 7.15 | 8.09  |
| 12 | 7.86 | 5.24 | 7.2  | 6.37 | 6.24  | 10.07 | 4.35 | 7.54 | 7.98  |
| 13 | 7.8  | 4.67 | 6.53 | 6.21 | 5.92  | 10.33 | 2.99 | 7.31 | 7.75  |
| 14 | 7.71 | 5.26 | 6.99 | 6.34 | 5.37  | 10.04 | 3.68 | 7.09 | 7.51  |
| 15 | 8.61 | 7.74 | 6.15 | 5.15 | 15.11 | 9.32  | 6.74 | 6.74 | 11.93 |
| 16 | 7.81 | 5.25 | 8.2  | 4.79 | 10.54 | 10.39 | 5.54 | 6.49 | 9.94  |
| 17 | 7.72 | 5.03 | 8.05 | 6.12 | 8.7   | 10.13 | 6.58 | 6.26 | 8.55  |
| 18 | 9.28 | 6.27 | 8.78 | 6.65 | 11.36 | 11.14 | 7.62 | 0.24 | 9.19  |
| 19 | 9.59 | 5.9  | 8.97 | 6.73 | 11.67 | 10.78 | 7.37 | 3.94 | 9.19  |
| 20 | 7.45 | 6.23 | 6.43 | 6.05 | 7.32  | 9.83  | 5.92 | 7.5  | 7.31  |
| 21 | 7.88 | 5.95 | 5.85 | 6.37 | 7.17  | 9.46  | 5.45 | 6.95 | 7.39  |
| 22 | 7.73 | 6.55 | 6.98 | 6.16 | 7.78  | 9.49  | 5.9  | 6.76 | 7.79  |
| 23 | 8.54 | 6.73 | 6.72 | 7.25 | 6.2   | 10.49 | 4.38 | 8.1  | 8.02  |
| 24 | 8.23 | 6.72 | 6.58 | 7.12 | 7.36  | 10.17 | 4.6  | 7.15 | 7.54  |
| 25 | 8.24 | 6.88 | 6.66 | 7.42 | 7     | 9.61  | 6.05 | 7.26 | 7.86  |
| 26 | 8.34 | 8.12 | 8.34 | 7.53 | 7.44  | 9.36  | 4.88 | 8.87 | 8.67  |
| 27 | 7.97 | 8.3  | 7.74 | 7.39 | 7.54  | 9.46  | 4.8  | 9.39 | 8.92  |
| 28 | 8.19 | 8.58 | 7.54 | 7.3  | 7.63  | 9.44  | 5.82 | 9.3  | 9.06  |
| 29 | 6.91 | 5.64 | 7.28 | 6.57 | 6.99  | 10.24 | 5.78 | 7.97 | 6.73  |
| 30 | 6.52 | 5.53 | 6.94 | 6.67 | 6.99  | 10.27 | 5.98 | 7.9  | 6.42  |
| 31 | 6.84 | 5.58 | 7.44 | 6.75 | 7.1   | 10.16 | 6.95 | 7.49 | 7.23  |
| 32 | 9.12 | 6.85 | 7.32 | 7.06 | 7.42  | 9.18  | 6.85 | 6.99 | 8.14  |
| 33 | 9.46 | 6.93 | 7.09 | 6.74 | 7.62  | 9.64  | 6.06 | 7.25 | 8.6   |
| 34 | 9.68 | 6.87 | 7.24 | 6.47 | 7.73  | 9.54  | 6.33 | 6.89 | 8.54  |
| 35 | 8.41 | 6.34 | 6.95 | 7.11 | 7.5   | 8.96  | 6.21 | 7.84 | 7.71  |
| 36 | 8.48 | 5.88 | 7.35 | 6.77 | 7.69  | 9.24  | 6.39 | 7.93 | 8     |
| 37 | 8.54 | 5.31 | 7.36 | 6.72 | 7.98  | 9.14  | 7.98 | 8.34 | 7.99  |
| 38 | 7.66 | 8.1  | 8.39 | 7.21 | 7.83  | 8.96  | 7.99 | 7.27 | 7.87  |
| 39 | 7.66 | 8.1  | 8.39 | 7.21 | 7.83  | 8.96  | 7.99 | 7.27 | 7.87  |
| 40 | 8.29 | 7.95 | 6.92 | 6.86 | 8.1   | 9.24  | 6.03 | 6.64 | 8.7   |
| 41 | 8.3  | 8.49 | 7.39 | 7.24 | 7.77  | 8.98  | 7.2  | 6.79 | 8.18  |
| 42 | 8.33 | 8.03 | 7.4  | 7.29 | 7.8   | 8.76  | 6.88 | 7.75 | 7.89  |
| 43 | 7.31 | 6.2  | 8.52 | 7.28 | 6.98  | 9.46  | 7.14 | 5.31 | 7.86  |
| 44 | 6.81 | 6.47 | 7.56 | 7.66 | 7.42  | 9.33  | 6.98 | 7.91 | 7.63  |
| 45 | 7.46 | 6.31 | 7.07 | 7.55 | 7.24  | 9.18  | 6.34 | 8.15 | 7.22  |
| 46 | 7.44 | 6.86 | 7.52 | 7.46 | 7.41  | 9.34  | 7.23 | 7.1  | 7.67  |
| 47 | 9.14 | 5.9  | 6.55 | 6.12 | 10.44 | 9.27  | 3.53 | 7.65 | 9.79  |
| 48 | 9.55 | 5.72 | 4.47 | 5.5  | 10.8  | 9.12  | 3.25 | 8    | 9.56  |
| 49 | 9.45 | 5.56 | 7.39 | 6.04 | 11.58 | 9.23  | 4.22 | 8.03 | 10.62 |
| 50 | 7.3  | 5.86 | 8.49 | 7.1  | 7.36  | 9.06  | 6.86 | 5.68 | 7.69  |
| 51 | 7.36 | 6.51 | 6.82 | 7.25 | 7.89  | 8.99  | 7.13 | 7.49 | 7.7   |
| 52 | 7.56 | 6.29 | 7    | 6.92 | 7.25  | 8.96  | 6.78 | 7.09 | 7.69  |
| 53 | 7.27 | 6.01 | 6.7  | 6.68 | 6.55  | 9.1   | 7.42 | 6.61 | 7.51  |
| 54 |      |      |      |      |       |       |      |      |       |
| 55 |      |      |      |      |       |       |      |      |       |
| 56 |      |      |      |      |       |       |      |      |       |
| 57 |      |      |      |      |       |       |      |      |       |
| 58 |      |      |      |      |       |       |      |      |       |
| 59 |      |      |      |      |       |       |      |      |       |
| 60 |      |      |      |      |       |       |      |      |       |

<https://mc.manuscriptcentral.com/gut>

|    |      |      |      |      |       |       |      |      |       |
|----|------|------|------|------|-------|-------|------|------|-------|
| 1  |      |      |      |      |       |       |      |      |       |
| 2  | 7.4  | 5.89 | 6.53 | 6.96 | 6.26  | 9.03  | 6.91 | 7.9  | 7.03  |
| 3  | 7.73 | 4.95 | 7.26 | 6.9  | 8.74  | 9.74  | 7.99 | 6.88 | 8.04  |
| 4  | 7.23 | 5.57 | 9.27 | 7.13 | 7.66  | 8.59  | 5.46 | 6.71 | 7.79  |
| 5  | 8.81 | 6.31 | 7.52 | 7.38 | 7.87  | 8.86  | 4.4  | 8.52 | 7.82  |
| 6  | 7.52 | 6.42 | 7.03 | 7.69 | 7.8   | 7.79  | 3.81 | 8.11 | 7.79  |
| 7  | 6.31 | 6.08 | 8.4  | 5.96 | 7.17  | 9.31  | 5.73 | 8.23 | 8.89  |
| 8  | 7.8  | 6.1  | 6.32 | 5.89 | 6.56  | 8.84  | 4.01 | 8.19 | 6.01  |
| 9  | 7.37 | 6.63 | 6.34 | 6.33 | 6.48  | 9.04  | 4.61 | 8.35 | 6.87  |
| 10 | 8.54 | 6.3  | 6.74 | 4.08 | 10.51 | 9.45  | 6.3  | 8.58 | 10.85 |
| 11 | 8.09 | 5.79 | 7.77 | 5.96 | 7.04  | 7.89  | 5.11 | 7.25 | 9.21  |
| 12 | 8.27 | 5.19 | 6.11 | 5.81 | 5.66  | 8.34  | 2.81 | 6.81 | 8.3   |
| 13 | 7.82 | 5.38 | 6.69 | 6.3  | 6.51  | 8.55  | 5.87 | 5.56 | 7.97  |
| 14 | 9.61 | 4.85 | 6.35 | 2.26 | 10.41 | 8.28  | 4.58 | 7.51 | 11.36 |
| 15 | 9.26 | 6.86 | 8.23 | 6.64 | 9.7   | 10.31 | 8.33 | 1.2  | 8.77  |
| 16 | 8.52 | 5.23 | 4.75 | 5.95 | 6.93  | 8.9   | 3.65 | 7.98 | 7.08  |
| 17 | 8.53 | 5.12 | 5.23 | 5.88 | 5.39  | 9.01  | 1.83 | 8.11 | 6.71  |
| 18 | 8.41 | 5.56 | 5.01 | 6.13 | 6.23  | 8.77  | 4.27 | 7.68 | 6.94  |
| 19 | 7.87 | 4.43 | 8.35 | 5.96 | 6.71  | 8.9   | 4.43 | 7.6  | 6.73  |
| 20 | 7.56 | 4.13 | 7.48 | 6.01 | 7.89  | 8.9   | 4.9  | 7.02 | 7.42  |
| 21 | 7.57 | 4.4  | 8.29 | 6.08 | 7.59  | 9.06  | 5.15 | 7.37 | 7.42  |
| 22 | 7.16 | 5.16 | 6.16 | 5.16 | 12.83 | 8.49  | 7.75 | 5.16 | 13.86 |
| 23 | 5.44 | 5.02 | 6.49 | 5.85 | 5.54  | 9.29  | 5.58 | 7.9  | 8.05  |
| 24 | 6.58 | 5.54 | 7.74 | 6.09 | 6.12  | 8.75  | 4.86 | 7.63 | 8.2   |
| 25 | 8.47 | 6.09 | 5.7  | 6.13 | 6.93  | 8.18  | 3.5  | 7.48 | 7.7   |
| 26 | 9.13 | 6.79 | 6.15 | 5.86 | 8.33  | 7.87  | 5.23 | 8.09 | 8.73  |
| 27 | 7.53 | 6.75 | 7.13 | 6.61 | 7.7   | 7.96  | 5.5  | 8.78 | 7.35  |
| 28 | 8.23 | 6.49 | 7.63 | 6.85 | 8.75  | 9.64  | 7.49 | 3    | 8.37  |
| 29 | 8.26 | 6.72 | 7.78 | 6.92 | 8.94  | 9.74  | 7.72 | 1.86 | 8.34  |
| 30 | 7.67 | 6.41 | 7.41 | 7.35 | 8.4   | 9.5   | 7.44 | 3.35 | 7.7   |
| 31 | 6.47 | 5.14 | 7.1  | 5.96 | 5.29  | 6.5   | 4.87 | 7.57 | 5.68  |
| 32 | 5.7  | 5.4  | 6.03 | 7.02 | 6.49  | 7.22  | 4.68 | 8.18 | 6.16  |
| 33 | 6.98 | 5.24 | 5.69 | 5.84 | 6.26  | 7.46  | 4.57 | 7.16 | 6.62  |
| 34 | 5.2  | 5.77 | 6.66 | 6.73 | 6.78  | 6.46  | 6.8  | 8.4  | 5.48  |
| 35 | 7.64 | 5.15 | 6.52 | 6.41 | 8.67  | 8.86  | 6.86 | 2.77 | 7.87  |
| 36 | 7.21 | 5.42 | 6.08 | 5.95 | 6.98  | 8.89  | 6.99 | 3.06 | 7.44  |
| 37 | 7.45 | 5.45 | 6    | 5.53 | 7.6   | 8.78  | 6.55 | 2.67 | 7.84  |
| 38 | 7.92 | 4.49 | 7.72 | 6.02 | 9.41  | 9.97  | 6.91 | 0    | 7.68  |
| 39 | 7.17 | 6.29 | 6.51 | 6.46 | 7.69  | 9.04  | 6.73 | 1.34 | 7.44  |
| 40 | 7.16 | 6.1  | 6.42 | 6.42 | 7.25  | 8.67  | 6.88 | 3.1  | 7.42  |
| 41 | 6.68 | 5.83 | 6.65 | 6.38 | 7.24  | 8.82  | 6.83 | 0.31 | 7.48  |
| 42 | 7.41 | 5.41 | 8.56 | 3.41 | 11.86 | 9.76  | 4.41 | 4.41 | 6     |
| 43 | 7.99 | 6.64 | 7.3  | 7.43 | 8.88  | 9.55  | 7.58 | 3.38 | 8.46  |
| 44 | 8.55 | 6.83 | 7.7  | 7.5  | 9.02  | 10.05 | 7.7  | 1.33 | 8.55  |
| 45 | 7.58 | 5.62 | 6.75 | 6.65 | 8.16  | 9.13  | 7.04 | 4.87 | 8.49  |
| 46 | 8.22 | 6.27 | 7.42 | 7.18 | 8.76  | 9.69  | 7.42 | 1.33 | 8.45  |
| 47 | 7.75 | 5.67 | 7.31 | 6.95 | 8.93  | 9.16  | 7.44 | 5.41 | 8.16  |
| 48 | 8.18 | 6.62 | 7.83 | 7.37 | 9.85  | 9.71  | 7.97 | 2.62 | 8.59  |
| 49 | 7.59 | 7.05 | 7.75 | 7.78 | 9.12  | 9.83  | 8.17 | 0.71 | 8.02  |
| 50 | 8.16 | 5.94 | 8.22 | 7.46 | 10.21 | 10.35 | 7.79 | 0.9  | 8.41  |
| 51 | 6.83 | 5.98 | 6.14 | 6.18 | 5.56  | 9.56  | 6.08 | 5.72 | 5.87  |
| 52 | 6.33 | 6.08 | 6.25 | 6.39 | 5.36  | 9.52  | 6.12 | 7.17 | 5.81  |
| 53 | 6.87 | 6.45 | 6.38 | 6.71 | 6.88  | 9.4   | 6.21 | 6.92 | 6.72  |

1  
2  
3  
4  
5  
6  
7  
8  
9  
10  
11  
12  
13  
14  
15  
16  
17  
18  
19  
20  
21  
22  
23  
24  
25  
26  
27  
28  
29  
30  
31  
32  
33  
34  
35  
36  
37  
38  
39  
40  
41  
42  
43  
44  
45  
46  
47  
48  
49  
50  
51  
52  
53  
54  
55  
56  
57  
58  
59  
60

|       |      |      |      |       |      |       |      |       |
|-------|------|------|------|-------|------|-------|------|-------|
| 6.81  | 6.48 | 6.76 | 6.79 | 6.93  | 9.51 | 6.82  | 5.59 | 6.82  |
| 7.8   | 6.4  | 7.83 | 7.42 | 7.83  | 9.41 | 6.07  | 8.34 | 7.8   |
| 8.53  | 6.38 | 7.59 | 7.48 | 8.29  | 9.69 | 6.06  | 9.15 | 7.8   |
| 7.54  | 6.67 | 6.87 | 7.22 | 7.67  | 9.58 | 5.83  | 7.91 | 8.01  |
| 7.21  | 6.67 | 7.06 | 7.15 | 7.77  | 9.8  | 5.93  | 7.51 | 8.18  |
| 8.28  | 5.7  | 8.64 | 6.8  | 7.7   | 9.26 | 6.44  | 6.92 | 7.91  |
| 8.83  | 6.33 | 7.69 | 6.37 | 8.03  | 9.3  | 5.3   | 7.91 | 8.46  |
| 8.4   | 5.37 | 7.63 | 6.37 | 7.25  | 9.4  | 5.07  | 7.55 | 7.43  |
| 8.2   | 6.57 | 8.35 | 6.89 | 9.04  | 8.79 | 5.44  | 7.61 | 8.51  |
| 9.83  | 6.76 | 6.85 | 7.09 | 7.86  | 8.99 | 5.46  | 8.82 | 9.09  |
| 9.54  | 6.91 | 7.27 | 7.51 | 7.91  | 8.67 | 5.34  | 8.03 | 8.59  |
| 9.47  | 6.49 | 7.29 | 7.03 | 7.91  | 8.15 | 6.14  | 8.4  | 8.6   |
| 9.81  | 7.01 | 6.51 | 6.97 | 7.81  | 8.71 | 4.97  | 8.22 | 8.69  |
| 7.56  | 6.38 | 7.27 | 6.34 | 6.83  | 9.06 | 5.52  | 6.89 | 7.37  |
| 7.69  | 6.68 | 6.65 | 6.63 | 6.59  | 8.97 | 3.83  | 8.06 | 7.35  |
| 7.23  | 6.55 | 7.25 | 6.98 | 8.57  | 8.56 | 6.85  | 7.8  | 8.21  |
| 5.58  | 5.39 | 9.24 | 7.31 | 6.37  | 8.02 | 5.08  | 7.56 | 7.53  |
| 7.38  | 6.19 | 6.84 | 6.62 | 6.55  | 8.79 | 3.25  | 8.44 | 7.52  |
| 6.77  | 6.4  | 7.46 | 7.33 | 7.13  | 8.24 | 4.22  | 8.53 | 7.68  |
| 8.03  | 5.97 | 7.89 | 6.06 | 6.12  | 8.76 | 6     | 6.57 | 7.4   |
| 6.64  | 5.92 | 5.85 | 6.62 | 6.91  | 9.39 | 4.5   | 8.85 | 7.56  |
| 5.71  | 5.75 | 4.8  | 5.69 | 6.08  | 9.14 | 3.29  | 7.94 | 7.61  |
| 9.12  | 6.32 | 7.63 | 6.66 | 7.26  | 8.16 | 5.28  | 7.45 | 7.78  |
| 9.22  | 6.42 | 7.32 | 6.63 | 7.27  | 8.1  | 5.68  | 8.09 | 7.62  |
| 10.48 | 6.32 | 7.06 | 6.61 | 11.18 | 7.24 | 10.21 | 8.24 | 9.53  |
| 4.36  | 4.89 | 8.35 | 5.98 | 5.01  | 8.64 | 6.19  | 6.55 | 6.12  |
| 6     | 5.55 | 7.31 | 6.41 | 6.41  | 8.29 | 4.7   | 7.28 | 5.92  |
| 6.42  | 4.35 | 6.68 | 5.65 | 5.67  | 9.29 | 4.01  | 7.35 | 6.09  |
| 1.9   | 5.48 | 6.48 | 6.81 | 6.15  | 8.38 | 4.9   | 8.45 | 6.22  |
| 7.25  | 6.4  | 6.51 | 5.66 | 7.71  | 8.86 | 6.15  | 1.76 | 7.18  |
| 7.42  | 6    | 6.42 | 5.97 | 7.38  | 8.75 | 6.39  | 3.89 | 7.47  |
| 7.29  | 6.09 | 6.59 | 6.74 | 7.82  | 8.95 | 6.97  | 2.47 | 7.28  |
| 6.79  | 5.35 | 5.91 | 6.42 | 7.72  | 8.6  | 6.57  | 1.96 | 7.38  |
| 6.19  | 4.53 | 6.71 | 5.57 | 6.5   | 7.81 | 4.72  | 4.88 | 7.18  |
| 6.49  | 5.83 | 6.86 | 5.66 | 7.3   | 8.02 | 5.42  | 4.95 | 7.14  |
| 6.03  | 5.55 | 6.82 | 6.21 | 6.9   | 8.04 | 5.7   | 5.92 | 6.77  |
| 6.18  | 5.34 | 6.57 | 6.06 | 6.83  | 7.6  | 5.85  | 6.72 | 6.77  |
| 2.68  | 5.11 | 9.85 | 7.41 | 6.19  | 8.5  | 5.11  | 6.33 | 6.97  |
| 8.71  | 5.78 | 7.11 | 6.46 | 7.95  | 9    | 4.05  | 7.42 | 8.44  |
| 6.94  | 5.51 | 7.95 | 6.03 | 6.28  | 9.47 | 3.59  | 8.13 | 8.32  |
| 7.44  | 3.82 | 7.63 | 4.23 | 8.74  | 9.87 | 5.93  | 6.88 | 11.02 |
| 6.94  | 5.15 | 7.18 | 5.85 | 7.67  | 9.34 | 4.95  | 6.12 | 7.52  |
| 4.51  | 6.83 | 7.1  | 4.51 | 9.68  | 9.27 | 4.51  | 7.68 | 10.97 |
| 7.69  | 5.62 | 6.74 | 6.71 | 6.86  | 9.72 | 4.87  | 8.38 | 7.29  |
| 7.73  | 5.39 | 6.56 | 6.84 | 7.08  | 9.67 | 4.52  | 8.68 | 7.18  |
| 7.59  | 4.14 | 3.27 | 7.95 | 3.68  | 8.28 | 2.68  | 5.64 | 6.54  |
| 7.63  | 4.57 | 7.59 | 7.27 | 8.39  | 8.87 | 5.34  | 6.68 | 7.17  |
| 6.77  | 4.18 | 6.92 | 7.64 | 6.43  | 8.34 | 4.08  | 6.47 | 6.74  |
| 7.33  | 5.75 | 7.39 | 7.13 | 7.58  | 8.76 | 6.21  | 6.45 | 7.19  |
| 7.04  | 4.78 | 7.91 | 5.74 | 6.38  | 8.97 | 5.74  | 8.83 | 5.7   |
| 6.64  | 5.05 | 6.17 | 6.34 | 7.13  | 8.51 | 4.85  | 8.17 | 6.02  |
| 6.95  | 5.48 | 6.55 | 6.1  | 6.96  | 8.37 | 4.88  | 7.37 | 5.94  |

<https://mc.manuscriptcentral.com/gut>



1  
2  
3  
4  
5  
6  
7  
8  
9  
10  
11  
12  
13  
14  
15  
16  
17  
18  
19  
20  
21  
22  
23  
24  
25  
26  
27  
28  
29  
30  
31  
32  
33  
34  
35  
36  
37  
38  
39  
40  
41  
42  
43  
44  
45  
46  
47  
48  
49  
50  
51  
52  
53  
54  
55  
56  
57  
58  
59  
60

|      |      |      |      |       |      |      |      |       |
|------|------|------|------|-------|------|------|------|-------|
| 6.77 | 4.6  | 6.04 | 5.74 | 7.25  | 8.18 | 5.65 | 7.95 | 6.25  |
| 6.62 | 4.68 | 5.68 | 4.56 | 8.18  | 7.95 | 3.68 | 7.95 | 6.39  |
| 6.42 | 3.59 | 4.98 | 5.23 | 6.67  | 8.67 | 4.98 | 7    | 5.98  |
| 5.95 | 4.39 | 5.57 | 5.13 | 6.68  | 8.98 | 4.81 | 6.49 | 5.74  |
| 8.14 | 6.01 | 7.08 | 6.25 | 8.8   | 8.91 | 6.08 | 5.25 | 8.15  |
| 5.57 | 4.21 | 7.29 | 5.92 | 6.72  | 9.19 | 6.07 | 6.96 | 5.4   |
| 5.26 | 4.2  | 6.65 | 4.28 | 6.17  | 9.55 | 3.65 | 5.33 | 6.1   |
| 5.19 | 3.88 | 6.26 | 3.88 | 6.35  | 9.48 | 4.21 | 5.6  | 5.74  |
| 7.77 | 6.13 | 6.73 | 6.87 | 8.24  | 9.06 | 6.87 | 1.27 | 7.41  |
| 7.23 | 5.87 | 7.25 | 6.7  | 7.46  | 8.93 | 6.25 | 5.85 | 7.37  |
| 6.6  | 5.63 | 8.06 | 5.92 | 7.96  | 7.66 | 6.41 | 7.03 | 7.58  |
| 6.75 | 6.02 | 6.87 | 6.53 | 7.47  | 8.75 | 4.59 | 6.87 | 7.58  |
| 6.97 | 5.79 | 7.1  | 6.26 | 7.99  | 7.81 | 4.95 | 6.86 | 7.29  |
| 6.71 | 6.35 | 7.61 | 6.67 | 7.8   | 7.9  | 7.43 | 7.02 | 6.87  |
| 9.4  | 4.54 | 5.54 | 2.54 | 11.33 | 9.2  | 8.9  | 6    | 10.46 |
| 5.63 | 4.44 | 7.37 | 4.8  | 7.65  | 8.86 | 4.61 | 5.73 | 6.7   |
| 6.69 | 4.79 | 7.17 | 6.08 | 6.84  | 8.88 | 5.76 | 6.15 | 6.53  |
| 5.84 | 3.92 | 7.11 | 4.84 | 8.06  | 8.81 | 4.71 | 5.28 | 7.28  |

1  
2  
3  
4  
5  
6  
7  
8  
9  
10  
11  
12  
13  
14  
15  
16  
17  
18  
19  
20  
21  
22  
23  
24  
25  
26  
27  
28  
29  
30  
31  
32  
33  
34  
35  
36  
37  
38  
39  
40  
41  
42  
43  
44  
45  
46  
47  
48  
49  
50  
51  
52  
53  
54  
55  
56  
57  
58  
59  
60

| QKI   | RAB25 | RAC1  | RAC2  | RAF1 | RAMP1 | RAMP2 | RB1  | RBL1 |
|-------|-------|-------|-------|------|-------|-------|------|------|
| 8.9   | 7.82  | 9.36  | 9.1   | 7.58 | 7.09  | 6.16  | 8.01 | 5.94 |
| 8.69  | 8.46  | 10.71 | 8.33  | 8.09 | 7.05  | 6.89  | 8.23 | 5.72 |
| 8.86  | 8.95  | 10.58 | 7.97  | 7.81 | 6.93  | 7.2   | 7.94 | 5.97 |
| 9.62  | 9.07  | 10.8  | 8.14  | 8.32 | 7.57  | 8.68  | 8.04 | 5.88 |
| 7.58  | 7.42  | 8.5   | 8.65  | 7.74 | 8.16  | 4.92  | 8.42 | 1.01 |
| 9.33  | 7.74  | 10.24 | 7.99  | 8.07 | 6.98  | 6.15  | 7.94 | 6.21 |
| 9.52  | 7.88  | 10.31 | 8.25  | 7.99 | 6.75  | 6.71  | 8.2  | 6.19 |
| 10.14 | 9.06  | 10.96 | 8.8   | 8.49 | 7.54  | 7.46  | 7.71 | 6.18 |
| 9.61  | 7.21  | 9.96  | 8.47  | 8.61 | 7.56  | 6.92  | 7.52 | 6.25 |
| 8.38  | 7.94  | 9.85  | 7.17  | 7.91 | 7.38  | 4.86  | 7.94 | 6.04 |
| 8.98  | 7.85  | 10.46 | 7.56  | 8.49 | 7.76  | 6.59  | 8.19 | 6.57 |
| 9.54  | 7.75  | 10.17 | 7.74  | 8.6  | 7.91  | 7.33  | 8.24 | 6.87 |
| 8.05  | 9.06  | 10.91 | 7.23  | 8.1  | 7.86  | 6.3   | 8.82 | 7.56 |
| 9.09  | 8.24  | 11    | 8.17  | 8.02 | 7.21  | 7.44  | 8.88 | 7.36 |
| 10.64 | 9.2   | 10.32 | 10.1  | 8.5  | 8.11  | 9.31  | 7.65 | 7.05 |
| 9.3   | 8.15  | 10.23 | 9.18  | 8.04 | 8.07  | 7.01  | 8.3  | 6.37 |
| 9.03  | 8.72  | 10.49 | 8.13  | 8.13 | 8.16  | 6.38  | 8.4  | 6.2  |
| 8.95  | 8.5   | 10.24 | 8.1   | 8.2  | 8.78  | 6.08  | 8.13 | 5.81 |
| 9.69  | 8.82  | 9.92  | 10.58 | 9.05 | 5.76  | 8.69  | 8.83 | 7.1  |
| 9.44  | 8.87  | 10.75 | 9.24  | 9.01 | 5.8   | 8.18  | 9.24 | 7.6  |
| 9.9   | 8.17  | 10.43 | 9.85  | 9.18 | 7.63  | 8.67  | 9.01 | 7.47 |
| 9.86  | 8.84  | 10.62 | 7.74  | 8.84 | 8.59  | 7.86  | 7.95 | 7.06 |
| 9.75  | 9.2   | 10.6  | 7.79  | 8.93 | 8.46  | 8.14  | 7.84 | 6.84 |
| 10.1  | 8.69  | 10.65 | 7.76  | 8.89 | 9.34  | 7.57  | 8.02 | 6.82 |
| 9.75  | 6.62  | 10.6  | 8.51  | 8.66 | 6.04  | 5.71  | 7.15 | 6.01 |
| 8.71  | 8.89  | 11.97 | 7.97  | 8.8  | 5.45  | 6.87  | 8.37 | 6.65 |
| 8.46  | 9.12  | 11.77 | 7.51  | 8.7  | 4.91  | 6.69  | 8.52 | 7.19 |
| 8.56  | 8.91  | 11.32 | 8.27  | 8.33 | 6.72  | 6.68  | 8.42 | 6.07 |
| 8.09  | 8.16  | 9.99  | 8.35  | 7.77 | 6.8   | 5.85  | 8.27 | 7.04 |
| 8.73  | 7.98  | 9.91  | 8.55  | 7.75 | 7.64  | 6.61  | 8    | 6    |
| 8.38  | 8.24  | 10.25 | 7.61  | 8.11 | 7.66  | 6.2   | 8.15 | 6.48 |
| 8.53  | 8.09  | 9.54  | 8.32  | 7.86 | 7.45  | 6.61  | 8.17 | 6.03 |
| 9.52  | 5.65  | 8.61  | 10.49 | 8.06 | 7.38  | 6.53  | 8.4  | 6.72 |
| 9.77  | 7.67  | 10.58 | 7.8   | 8.53 | 9.21  | 7.59  | 9.03 | 6.99 |
| 9.02  | 8.57  | 10.68 | 7.87  | 8.45 | 8.44  | 6.96  | 9.31 | 7.06 |
| 9.39  | 8.29  | 10.44 | 7.77  | 8.51 | 9.21  | 7.87  | 8.89 | 6.58 |
| 9.51  | 7.35  | 9.79  | 10.3  | 8.22 | 5.09  | 7.02  | 7.73 | 6.4  |
| 8.95  | 7.58  | 10.33 | 9.18  | 8.24 | 5.02  | 6.16  | 7.9  | 6.63 |
| 9.28  | 6.67  | 9.54  | 9.64  | 8.01 | 5.69  | 6.45  | 7.4  | 6.45 |
| 9.28  | 6.96  | 9.66  | 9.81  | 8.17 | 5.74  | 6.5   | 7.76 | 6.49 |
| 8.36  | 7.41  | 8.9   | 8.02  | 7.11 | 6.64  | 6.02  | 8.09 | 5.07 |
| 8.04  | 7.51  | 9.14  | 7.11  | 7.14 | 6.42  | 5.51  | 8.24 | 4.54 |
| 8.14  | 6.93  | 9.09  | 7.22  | 7.38 | 6.37  | 5.71  | 8.39 | 5.17 |
| 8.23  | 7.65  | 9.57  | 6.95  | 7.4  | 6     | 5.54  | 8.41 | 5.49 |
| 8.59  | 9.47  | 9.25  | 8.11  | 8.56 | 8.22  | 8.22  | 6.32 | 6.86 |
| 8.65  | 7.8   | 9.95  | 7.85  | 8.12 | 6.02  | 7.31  | 7.79 | 6.48 |
| 8.98  | 7.64  | 10.1  | 7.47  | 7.84 | 5.58  | 7.83  | 8.04 | 6.6  |
| 9.4   | 6.98  | 9.96  | 7.22  | 8.02 | 6.42  | 7.7   | 7.63 | 6.44 |
| 10.26 | 8.09  | 11.15 | 9.28  | 8.6  | 6.94  | 7.58  | 8.7  | 7.76 |
| 10.54 | 7.85  | 11.23 | 8.47  | 8.7  | 6.52  | 7.18  | 8.76 | 7.81 |
| 10.59 | 7.72  | 11.21 | 8.92  | 8.72 | 8.04  | 6.82  | 9.23 | 7.86 |

<https://mc.manuscriptcentral.com/gut>

1  
2  
3  
4  
5  
6  
7  
8  
9  
10  
11  
12  
13  
14  
15  
16  
17  
18  
19  
20  
21  
22  
23  
24  
25  
26  
27  
28  
29  
30  
31  
32  
33  
34  
35  
36  
37  
38  
39  
40  
41  
42  
43  
44  
45  
46  
47  
48  
49  
50  
51  
52  
53  
54  
55  
56  
57  
58  
59  
60

|       |      |       |       |      |      |      |       |      |
|-------|------|-------|-------|------|------|------|-------|------|
| 10.76 | 7.65 | 11.16 | 9.02  | 8.94 | 7.6  | 7.34 | 9.06  | 8.14 |
| 8.08  | 9.59 | 10.49 | 7.96  | 8.71 | 7.38 | 5.84 | 9.33  | 7.65 |
| 8.4   | 9.25 | 10.98 | 7.7   | 8.58 | 7.27 | 6.65 | 9.37  | 7.42 |
| 8.1   | 9.33 | 10.98 | 7.4   | 8.57 | 7.06 | 6.52 | 9.45  | 7.4  |
| 8.54  | 9.11 | 10.74 | 7.67  | 8.51 | 7.85 | 6.55 | 9.37  | 7.41 |
| 9.11  | 8.82 | 10.64 | 9.45  | 8.57 | 6.77 | 7.23 | 8.93  | 7.25 |
| 9.18  | 9.18 | 11.61 | 7.76  | 8.54 | 7.61 | 7.49 | 9.13  | 7.77 |
| 7.64  | 9.38 | 11.89 | 6.49  | 8.84 | 7.37 | 6.45 | 9.43  | 7.89 |
| 9.1   | 8.97 | 11.49 | 7.71  | 8.63 | 8.23 | 6.8  | 9.35  | 7.81 |
| 8.53  | 8.48 | 10.76 | 7.78  | 8.5  | 5.92 | 5.92 | 8.18  | 7.96 |
| 8.9   | 8.88 | 10.67 | 8.42  | 8.63 | 5.63 | 6.92 | 8.64  | 7.2  |
| 8.44  | 9.01 | 10.71 | 7.49  | 8.54 | 5.88 | 6.62 | 8.54  | 7.34 |
| 8.67  | 8.73 | 10.61 | 7.81  | 8.35 | 7.12 | 6.56 | 8.46  | 7.19 |
| 8.15  | 8.15 | 9.47  | 9.96  | 6.74 | 9.79 | 5.15 | 10.06 | 7.96 |
| 8.54  | 8.88 | 9.79  | 9.78  | 8.84 | 8.27 | 6.34 | 9.95  | 5.88 |
| 8.56  | 8.55 | 9.68  | 9.24  | 8.35 | 7.79 | 5.7  | 9.21  | 6.12 |
| 7.64  | 8.27 | 7.46  | 10.09 | 8.82 | 9.97 | 2.83 | 10.34 | 2.57 |
| 7.6   | 8.01 | 7.5   | 9.79  | 8.44 | 9.55 | 3.77 | 9.68  | 3.36 |
| 7.32  | 9.22 | 11.05 | 6.97  | 8.19 | 5.92 | 5.27 | 8.69  | 7.62 |
| 7.12  | 9.52 | 11.28 | 7.03  | 8.18 | 6.03 | 4.99 | 8.72  | 7.36 |
| 7.72  | 9.16 | 10.86 | 8     | 8.15 | 6.84 | 5.86 | 8.55  | 6.99 |
| 9.53  | 8.89 | 11.33 | 7.69  | 8.82 | 5.7  | 7.91 | 8.94  | 8.47 |
| 9.28  | 8.52 | 11.38 | 7.44  | 8.68 | 6.55 | 7.55 | 8.96  | 8.4  |
| 9.68  | 8.21 | 11.01 | 7.57  | 8.08 | 7.3  | 7.76 | 8.43  | 7.51 |
| 9.86  | 9.88 | 11.36 | 9.44  | 9.39 | 6.49 | 7.18 | 8.75  | 7.56 |
| 10.14 | 9.86 | 11.5  | 8.59  | 9.25 | 6.92 | 7.44 | 8.86  | 7.33 |
| 10.18 | 9.92 | 11.45 | 8.24  | 9.31 | 6.88 | 7.2  | 8.73  | 7.48 |
| 8.98  | 8.3  | 10.1  | 8.13  | 7.78 | 7.68 | 7.52 | 8.08  | 6.87 |
| 8.73  | 8.29 | 10.16 | 7.75  | 7.75 | 7.95 | 7.45 | 7.91  | 6.92 |
| 9     | 8.26 | 10.13 | 7.99  | 7.84 | 7.8  | 7.41 | 8.08  | 6.58 |
| 8.89  | 9.32 | 10.46 | 8.46  | 8.39 | 7.44 | 6.75 | 9.12  | 6.63 |
| 8.37  | 9.61 | 10.79 | 8.43  | 8.16 | 7.86 | 6.2  | 9.17  | 7.04 |
| 8.16  | 9.63 | 10.67 | 8.75  | 8.31 | 7.68 | 5.72 | 9.22  | 6.35 |
| 9.32  | 8.45 | 10.72 | 8.01  | 8.33 | 7.59 | 6.6  | 8.33  | 6.05 |
| 9.2   | 8.54 | 10.77 | 8.54  | 8.44 | 7.27 | 6.22 | 8.55  | 6.16 |
| 9.35  | 8.63 | 10.57 | 8.34  | 8.34 | 7.72 | 6.51 | 8.68  | 5.97 |
| 8.94  | 8.26 | 9.46  | 8.96  | 8.09 | 7.41 | 6.57 | 8.3   | 5.48 |
| 8.94  | 8.26 | 9.46  | 8.96  | 8.09 | 7.41 | 6.57 | 8.3   | 5.48 |
| 8.82  | 9.22 | 10.26 | 8.15  | 8.52 | 8.14 | 6.34 | 8.67  | 5.93 |
| 9.05  | 8.7  | 10.14 | 8.14  | 8.24 | 8.6  | 6.5  | 8.48  | 5.18 |
| 9.27  | 8.71 | 10.12 | 8.05  | 8.28 | 8.26 | 6.06 | 8.88  | 5.47 |
| 8.44  | 7.38 | 8.69  | 9.3   | 7.35 | 7.44 | 6.78 | 8.12  | 5.6  |
| 8.91  | 8.49 | 9.86  | 8.51  | 8.12 | 8.08 | 7.23 | 8.25  | 5.82 |
| 8.51  | 8.85 | 10.24 | 8.14  | 8.19 | 7.86 | 7.05 | 8.32  | 6.52 |
| 8.85  | 8.14 | 9.55  | 8.46  | 7.69 | 8.17 | 7.05 | 8.22  | 5.78 |
| 8.83  | 9.66 | 11.18 | 8.39  | 8.46 | 8.49 | 7.27 | 9.02  | 6.22 |
| 7.93  | 9.82 | 11.59 | 7.57  | 8.31 | 8.23 | 6.58 | 9     | 6.6  |
| 9.18  | 9.73 | 10.82 | 9.31  | 8.4  | 8.55 | 7.77 | 8.56  | 6.32 |
| 8.59  | 7.1  | 9.12  | 9.03  | 7.66 | 7.01 | 6.58 | 8.22  | 5.51 |
| 9.19  | 7.46 | 9.61  | 8.05  | 7.58 | 8.33 | 7.47 | 8.06  | 4.97 |
| 8.99  | 7.64 | 9.62  | 7.83  | 7.74 | 8.29 | 7.2  | 7.9   | 5.41 |
| 8.35  | 8.35 | 9.2   | 7.92  | 8.51 | 6.18 | 5.75 | 8.06  | 5.26 |

<https://mc.manuscriptcentral.com/gut>

1  
2  
3  
4  
5  
6  
7  
8  
9  
10  
11  
12  
13  
14  
15  
16  
17  
18  
19  
20  
21  
22  
23  
24  
25  
26  
27  
28  
29  
30  
31  
32  
33  
34  
35  
36  
37  
38  
39  
40  
41  
42  
43  
44  
45  
46  
47  
48  
49  
50  
51  
52  
53  
54  
55  
56  
57  
58  
59  
60

|      |       |       |       |      |      |      |       |      |
|------|-------|-------|-------|------|------|------|-------|------|
| 8.71 | 8.4   | 9.63  | 7.47  | 8.69 | 6.68 | 6.21 | 8     | 5.72 |
| 8.33 | 8.39  | 8.56  | 8.16  | 8.16 | 8.29 | 5.33 | 8.56  | 3.48 |
| 9.27 | 7.4   | 10.19 | 9.78  | 8.33 | 7.73 | 7.35 | 8.74  | 6.61 |
| 9.87 | 9.49  | 11.07 | 8.44  | 8.72 | 8.71 | 7.64 | 8.8   | 6.78 |
| 9.98 | 7.66  | 10.61 | 8.04  | 8.61 | 9.28 | 7.8  | 8.41  | 6.13 |
| 9.69 | 6.96  | 10.08 | 10.19 | 8.47 | 5.96 | 7.94 | 7.76  | 6.64 |
| 9.01 | 8.72  | 10.5  | 7.82  | 8.45 | 7.75 | 5.94 | 8.69  | 6.5  |
| 9.15 | 8.53  | 10.48 | 7.91  | 8.57 | 7    | 6.84 | 8.41  | 6.77 |
| 9.66 | 9.7   | 10.04 | 9.73  | 8.47 | 9.76 | 8.9  | 7.66  | 6.66 |
| 9.46 | 8.2   | 10.34 | 9.39  | 8.77 | 5.18 | 7.76 | 8.66  | 6.6  |
| 9.32 | 8.2   | 10.28 | 7.85  | 8.79 | 5.25 | 6.11 | 9.41  | 6.27 |
| 8.3  | 7.57  | 10.09 | 7.81  | 7.97 | 6.54 | 5.28 | 8.94  | 6    |
| 9.45 | 9.4   | 10.5  | 9.14  | 8.65 | 8.07 | 8.62 | 8.35  | 6.26 |
| 7.61 | 8.87  | 9.29  | 9.29  | 7.52 | 9.32 | 2.52 | 9.78  | 0.2  |
| 8.17 | 9.99  | 10.8  | 6.88  | 7.95 | 5.47 | 6.19 | 9.09  | 6.56 |
| 8.14 | 10.16 | 10.85 | 6.43  | 8.31 | 4.54 | 6.67 | 9.05  | 6.87 |
| 8.49 | 9.99  | 10.65 | 6.59  | 8.2  | 6.35 | 6.6  | 8.85  | 6.7  |
| 9.61 | 8.34  | 10.69 | 8.85  | 8.52 | 4.86 | 5.89 | 8.25  | 7.2  |
| 9.02 | 7.89  | 10.06 | 8.8   | 7.8  | 6.96 | 4.47 | 7.98  | 6.07 |
| 9.59 | 8.1   | 10.52 | 8.87  | 8.04 | 7.15 | 5.72 | 8.18  | 6.54 |
| 5.16 | 8.75  | 5.16  | 8.86  | 5.16 | 8.16 | 8.49 | 7.16  | 6.75 |
| 8.69 | 7.18  | 10.53 | 7.91  | 7.99 | 5.69 | 6.13 | 8.57  | 6.28 |
| 9.32 | 7.58  | 10.33 | 8.54  | 8.03 | 6.51 | 6.66 | 8.45  | 6.51 |
| 9.35 | 9.21  | 10.3  | 7.48  | 8.38 | 8.65 | 7.25 | 7.84  | 6.77 |
| 9.34 | 9.53  | 10.25 | 8.39  | 8.47 | 8.56 | 8.79 | 7.9   | 5.91 |
| 9.84 | 8.21  | 10.29 | 7.95  | 8.36 | 7.73 | 8.1  | 8.13  | 6.65 |
| 7.83 | 7.54  | 8.73  | 8.24  | 6.13 | 7.97 | 5    | 8.21  | 3.32 |
| 7.41 | 7.83  | 8.73  | 8.4   | 6.59 | 8.15 | 4.76 | 8.28  | 3.86 |
| 7.44 | 7.38  | 8.51  | 8.7   | 6.47 | 7.52 | 4.94 | 8.03  | 4.57 |
| 8.93 | 7.02  | 9.25  | 7.67  | 7.21 | 5.94 | 6.45 | 7.72  | 5.74 |
| 9.21 | 5.89  | 9.34  | 7.11  | 7.19 | 7.57 | 7.27 | 7.2   | 5.61 |
| 8.67 | 7.4   | 9.26  | 7.26  | 7.33 | 7.72 | 7.59 | 7.77  | 6.13 |
| 9.52 | 5.55  | 9.66  | 6.94  | 7.31 | 6.81 | 7.56 | 7.4   | 5.88 |
| 7.07 | 6.56  | 7.35  | 8.14  | 6.26 | 7.26 | 3.77 | 7.55  | 2.04 |
| 6.76 | 6.94  | 7.97  | 7.5   | 5.42 | 6.84 | 3.84 | 7.51  | 1.25 |
| 6.5  | 7.12  | 7.94  | 7.44  | 5.7  | 7.08 | 3.43 | 7.38  | 3.51 |
| 6.71 | 6.69  | 6.58  | 8.26  | 6.86 | 8.04 | 1.64 | 9.07  | 0    |
| 6.89 | 6.86  | 8.02  | 7.46  | 6.38 | 7.06 | 4.51 | 7.38  | 3.66 |
| 7.12 | 6.56  | 7.93  | 7.6   | 5.9  | 7.1  | 5.1  | 6.9   | 1.1  |
| 6.74 | 6.74  | 7.86  | 7.43  | 5.77 | 7.01 | 5.12 | 7.41  | 1.31 |
| 7.32 | 5     | 5     | 8.11  | 8.66 | 8.66 | 2.41 | 10.32 | 2.41 |
| 7.95 | 7.67  | 8.89  | 8.51  | 7.1  | 8.1  | 5.23 | 8.01  | 3.38 |
| 7.82 | 7.77  | 9.17  | 8.86  | 7.13 | 8.27 | 3.97 | 8.51  | 1.91 |
| 8.18 | 9.06  | 9.11  | 8.18  | 7.31 | 7.44 | 4.87 | 7.62  | 4.04 |
| 7.63 | 8.13  | 8.43  | 8.51  | 6.87 | 7.97 | 4.5  | 8.3   | 1.75 |
| 8.38 | 7.93  | 8.94  | 8.66  | 7.12 | 7.63 | 6.32 | 8.21  | 4.3  |
| 7.53 | 8.46  | 8.99  | 8.49  | 6.54 | 8.31 | 6.62 | 8.61  | 2.62 |
| 7.29 | 7.76  | 9.05  | 8.67  | 6.71 | 7.65 | 6.2  | 8.89  | 3.71 |
| 7.75 | 7.61  | 7.71  | 8.58  | 7.33 | 8.52 | 4.42 | 9.43  | 0.9  |
| 7.84 | 8.03  | 8.91  | 7.19  | 7.74 | 6.65 | 4.43 | 7.4   | 6.32 |
| 8.29 | 8.33  | 9.41  | 7.01  | 7.49 | 7.17 | 5.44 | 7.6   | 6.17 |
| 8.42 | 8.47  | 9.19  | 7.28  | 7.41 | 7.17 | 5.94 | 7.78  | 6.27 |

<https://mc.manuscriptcentral.com/gut>

|    |       |      |       |       |      |       |      |      |      |
|----|-------|------|-------|-------|------|-------|------|------|------|
| 1  |       |      |       |       |      |       |      |      |      |
| 2  | 8.44  | 8.19 | 8.84  | 7.26  | 7.45 | 6.81  | 5.27 | 7.68 | 6.05 |
| 3  | 9.26  | 9.4  | 10.69 | 8.97  | 9.55 | 8.4   | 6.99 | 8.72 | 6.64 |
| 4  | 9.25  | 9.29 | 10.71 | 8.69  | 9.3  | 7.92  | 7.33 | 8.71 | 6.69 |
| 5  | 8.33  | 9.59 | 10.65 | 7.79  | 9.5  | 8.67  | 6.06 | 8.68 | 5.87 |
| 6  | 8.53  | 9.65 | 10.76 | 8.15  | 9.54 | 8.63  | 6.19 | 8.89 | 6.38 |
| 7  | 9.05  | 8.27 | 10.22 | 9.74  | 8.36 | 8.33  | 6.94 | 9.18 | 6.57 |
| 8  | 9.49  | 9.46 | 11.29 | 9.52  | 9.12 | 9.09  | 8.02 | 8.67 | 6.72 |
| 9  | 9.16  | 9.03 | 11.31 | 8.75  | 8.98 | 8.66  | 7.13 | 8.9  | 6.99 |
| 10 | 10.13 | 8.78 | 10.74 | 9.66  | 8.93 | 10.28 | 8.36 | 8.56 | 6.85 |
| 11 | 9.64  | 9.09 | 11.43 | 8.33  | 8.44 | 6.91  | 7.45 | 9.46 | 6.65 |
| 12 | 9.61  | 8.95 | 11.46 | 8.35  | 8.56 | 8.49  | 8.09 | 9.85 | 7.06 |
| 13 | 9.91  | 8.97 | 11.48 | 8.68  | 8.94 | 8.36  | 7.48 | 9.77 | 7.14 |
| 14 | 9.59  | 9.06 | 11.44 | 7.93  | 8.76 | 8.56  | 7.79 | 9.73 | 6.98 |
| 15 | 8.79  | 8.18 | 9.75  | 8.78  | 8.1  | 7.66  | 6.31 | 8.64 | 6.18 |
| 16 | 9.03  | 8.87 | 10.23 | 8.56  | 8.39 | 8.07  | 7.43 | 8.96 | 6.55 |
| 17 | 9.33  | 8.07 | 9.9   | 8.63  | 7.91 | 9.05  | 8.09 | 8.29 | 4.67 |
| 18 | 9.94  | 7.28 | 10.12 | 10.17 | 8.44 | 5.61  | 8.26 | 8.27 | 7.08 |
| 19 | 9.34  | 8.93 | 10.61 | 8.4   | 8.63 | 7.46  | 7.54 | 8.27 | 6.55 |
| 20 | 10.08 | 7.97 | 10.45 | 8.63  | 8.58 | 8.72  | 8.1  | 8.38 | 6.45 |
| 21 | 8.8   | 8.77 | 10.22 | 8.57  | 8.31 | 7.66  | 6.75 | 8.58 | 7.52 |
| 22 | 8.72  | 8.66 | 10.93 | 7.4   | 8.33 | 6.17  | 6.73 | 8.52 | 7.76 |
| 23 | 7.53  | 9.15 | 10.64 | 6.51  | 8.06 | 5.18  | 6.34 | 8.82 | 7.66 |
| 24 | 9.12  | 8.39 | 10.2  | 8.78  | 8.02 | 7.17  | 7.01 | 7.87 | 6.06 |
| 25 | 8.91  | 8.23 | 10.58 | 8.5   | 8.49 | 7.18  | 6.54 | 8.09 | 6.45 |
| 26 | 10.26 | 9.19 | 10.15 | 8.85  | 8.67 | 10.75 | 8.91 | 7.85 | 6.15 |
| 27 | 8.7   | 5.95 | 9.23  | 9.09  | 7.33 | 7.03  | 6.06 | 7.69 | 6.22 |
| 28 | 8.65  | 6.11 | 9     | 7.8   | 7.59 | 6.98  | 6.88 | 7.98 | 5.49 |
| 29 | 8.32  | 6.51 | 9.24  | 7.04  | 7.07 | 6.79  | 5.67 | 8.19 | 6.49 |
| 30 | 9.49  | 5.71 | 9.15  | 7.9   | 7.78 | 7.71  | 7.26 | 7.65 | 6.9  |
| 31 | 6.97  | 6.51 | 7.93  | 7.66  | 6.34 | 6.97  | 5.22 | 7.18 | 1.76 |
| 32 | 7.06  | 6.95 | 7.64  | 7.02  | 6.47 | 6.74  | 5.67 | 7.04 | 3.04 |
| 33 | 6.82  | 6.74 | 8.08  | 7.44  | 6.28 | 6.38  | 4.59 | 7.63 | 0.88 |
| 34 | 6.96  | 6.6  | 7.81  | 7.68  | 6    | 6.45  | 4.96 | 7.26 | 0.96 |
| 35 | 7.51  | 6.58 | 8.69  | 7.79  | 6.81 | 5.74  | 5.27 | 7.35 | 4.75 |
| 36 | 7.42  | 6.71 | 8.5   | 7.4   | 6.64 | 6.64  | 5.68 | 7.04 | 4.05 |
| 37 | 7.89  | 6.54 | 8.78  | 7.23  | 6.7  | 6.79  | 5.67 | 7.27 | 3.77 |
| 38 | 8.23  | 6.09 | 8.64  | 7.2   | 6.86 | 6.7   | 5.64 | 6.94 | 3.81 |
| 39 | 9.78  | 2.35 | 9.54  | 11.56 | 8.54 | 4.68  | 7.81 | 8.49 | 7.14 |
| 40 | 9.1   | 9.51 | 10.46 | 8.65  | 8.24 | 6.99  | 6.51 | 8.34 | 7.16 |
| 41 | 9.19  | 9.09 | 10.5  | 9.02  | 8.69 | 5.23  | 7.16 | 8.64 | 7.16 |
| 42 | 9.75  | 9.54 | 10.29 | 10.85 | 8.89 | 7.48  | 8.54 | 7.36 | 6.23 |
| 43 | 8.94  | 8.99 | 9.85  | 8.35  | 8.47 | 7.26  | 5.87 | 8.57 | 6.43 |
| 44 | 9.15  | 9.15 | 10.03 | 9.9   | 7.83 | 8.21  | 8.76 | 7.83 | 7.32 |
| 45 | 9.28  | 9.24 | 10.5  | 7.89  | 8.53 | 8.44  | 7.32 | 7.73 | 7.07 |
| 46 | 9.67  | 9.3  | 10.55 | 7.44  | 8.64 | 9.24  | 7.04 | 7.72 | 6.87 |
| 47 | 6.41  | 8.45 | 10.11 | 6.56  | 8.24 | 9.13  | 5.73 | 6.33 | 6.49 |
| 48 | 8.67  | 7.79 | 10    | 8.57  | 8.11 | 8.86  | 6.78 | 7.8  | 6.13 |
| 49 | 8.36  | 7.69 | 10.04 | 8.01  | 8.3  | 8.71  | 6.81 | 7.07 | 6.5  |
| 50 | 8.49  | 7.31 | 9.82  | 8.4   | 7.82 | 8.34  | 6.52 | 7.32 | 6.06 |
| 51 | 9.23  | 6.83 | 9.65  | 8.43  | 7.49 | 7.37  | 6.37 | 6.92 | 6.41 |
| 52 | 8.58  | 6.62 | 9.26  | 7.27  | 6.94 | 6.74  | 5.23 | 6.92 | 5.48 |
| 53 | 8.49  | 6.23 | 8.91  | 7.33  | 7.01 | 6.97  | 5.83 | 6.73 | 5.51 |

<https://mc.manuscriptcentral.com/gut>

|      |       |       |      |      |       |      |      |      |
|------|-------|-------|------|------|-------|------|------|------|
| 9.27 | 7.11  | 9.39  | 7.42 | 7.66 | 8.68  | 6.65 | 6.54 | 5.79 |
| 8.1  | 7.8   | 9.56  | 6.88 | 8.03 | 7.14  | 6.1  | 7.05 | 5.19 |
| 7.69 | 7.31  | 9.37  | 6.17 | 8.57 | 6.31  | 5.11 | 6.96 | 5.94 |
| 7.95 | 7.13  | 9.44  | 6.42 | 8.78 | 5.49  | 5.24 | 7.32 | 6.13 |
| 7.31 | 7.23  | 8.18  | 7.62 | 7.41 | 8.01  | 5.8  | 7.17 | 1.55 |
| 8.72 | 7.89  | 10.4  | 7.47 | 7.91 | 6.66  | 5.87 | 7.39 | 6.09 |
| 7.48 | 8.34  | 10.03 | 7.48 | 7.9  | 7.9   | 4.53 | 7.2  | 6.48 |
| 7.47 | 8.48  | 10.08 | 7.45 | 7.81 | 7.78  | 4.78 | 7.2  | 6.65 |
| 6.75 | 6.7   | 8.53  | 8.3  | 6.23 | 7.9   | 3.44 | 7.8  | 1.27 |
| 8.18 | 7.01  | 8.84  | 8.24 | 7.36 | 7.17  | 5.96 | 7.57 | 4.42 |
| 9.31 | 6.54  | 10.14 | 9.31 | 7.85 | 5.8   | 6.45 | 7.92 | 6.21 |
| 8.89 | 7.17  | 10.32 | 8.17 | 7.46 | 7.44  | 6.53 | 7.97 | 5.7  |
| 9.26 | 7.15  | 9.98  | 8.52 | 7.93 | 7.79  | 7.11 | 7.48 | 5.89 |
| 9.62 | 6.26  | 9.97  | 7.94 | 7.56 | 6.67  | 6.76 | 7.98 | 5.8  |
| 8.61 | 10.24 | 9.3   | 7.83 | 8.04 | 10.05 | 8.35 | 6.63 | 5.71 |
| 8.4  | 8.63  | 9.59  | 8.41 | 7.92 | 9.03  | 6.23 | 7.91 | 6.16 |
| 8.24 | 7.25  | 9.21  | 8    | 7.65 | 7.24  | 5.86 | 7.6  | 5.66 |
| 8.29 | 8.89  | 9.49  | 8.44 | 7.91 | 9.53  | 6.51 | 7.44 | 5.8  |

1  
2  
3  
4  
5  
6  
7  
8  
9  
10  
11  
12  
13  
14  
15  
16  
17  
18  
19  
20  
21  
22  
23  
24  
25  
26  
27  
28  
29  
30  
31  
32  
33  
34  
35  
36  
37  
38  
39  
40  
41  
42  
43  
44  
45  
46  
47  
48  
49  
50  
51  
52  
53  
54  
55  
56  
57  
58  
59  
60

| RBL2 | RBM47 | RBPJ  | RBX1  | RELN | RGCC  | RHOA  | RNH1  | ROBO4 |
|------|-------|-------|-------|------|-------|-------|-------|-------|
| 8.55 | 7.66  | 9.21  | 9.16  | 5.34 | 8.86  | 9.63  | 8.45  | 4.92  |
| 8.14 | 8.55  | 8.83  | 9.33  | 1.42 | 10.36 | 10.33 | 9.08  | 6.41  |
| 8.14 | 8.49  | 9     | 9.48  | 2.67 | 9.65  | 10.34 | 9.18  | 6.42  |
| 8.32 | 8.14  | 8.66  | 9.89  | 5.31 | 10.41 | 11.12 | 9.87  | 7.12  |
| 7.65 | 6.89  | 10.85 | 8.36  | 1.01 | 8.38  | 8.15  | 8.89  | 3.59  |
| 7.95 | 7.46  | 9.37  | 9.1   | 4.62 | 9.11  | 10.13 | 8.58  | 4.66  |
| 8.03 | 7.9   | 9.25  | 9.26  | 3.92 | 9.37  | 10.36 | 8.71  | 5.8   |
| 8.27 | 7.39  | 8.66  | 9.95  | 4.72 | 9.65  | 11.77 | 10.13 | 6.25  |
| 8.6  | 8.21  | 8.55  | 9.82  | 4.27 | 9.07  | 11.14 | 9.59  | 5.98  |
| 8.16 | 8     | 8.72  | 9.45  | 2.72 | 8.46  | 10.31 | 8.79  | 2.72  |
| 8.41 | 8.69  | 8.67  | 9.96  | 3.7  | 9     | 10.9  | 9.09  | 5.13  |
| 8.57 | 8.34  | 8.82  | 9.96  | 5.38 | 8.91  | 10.88 | 9.31  | 5.77  |
| 9.08 | 7.83  | 9.31  | 9.68  | 2.77 | 8.65  | 10.44 | 9.11  | 4.8   |
| 8.78 | 7.77  | 9.56  | 9.98  | 2.26 | 9.27  | 10.36 | 9.28  | 5.98  |
| 8.29 | 7.38  | 8.71  | 11.23 | 1.77 | 10.22 | 11.97 | 10.78 | 6.35  |
| 8.66 | 8.83  | 9.39  | 9.65  | 4.11 | 9.56  | 10.98 | 9.36  | 5.47  |
| 8.84 | 9.17  | 9.61  | 9.57  | 3.87 | 10.11 | 10.95 | 9.19  | 4.75  |
| 8.25 | 8.48  | 9.66  | 9.69  | 4.57 | 10.3  | 11.55 | 9.7   | 5.08  |
| 9.27 | 7.62  | 9.03  | 10.49 | 3.6  | 10.66 | 11.08 | 10.26 | 7.36  |
| 9.2  | 8.75  | 9.42  | 10.41 | 4.01 | 10.08 | 10.75 | 9.41  | 6.92  |
| 9.52 | 8.15  | 9.65  | 10.44 | 4.25 | 10.59 | 10.79 | 9.7   | 7.58  |
| 8.93 | 7.94  | 9.13  | 10.11 | 5.01 | 10.59 | 10.71 | 9.67  | 6.28  |
| 9.09 | 7.99  | 9.18  | 10.01 | 3.66 | 10.9  | 10.77 | 9.5   | 5.9   |
| 8.95 | 7.55  | 9.32  | 10.02 | 6.04 | 10.56 | 10.71 | 9.59  | 5.35  |
| 8.34 | 7.56  | 8.8   | 10.57 | 2.43 | 8.96  | 10.48 | 8.97  | 4.23  |
| 8.31 | 8.99  | 8.22  | 10.36 | 3.45 | 9.66  | 11.26 | 9.38  | 5.88  |
| 8.62 | 8.85  | 8.43  | 10.29 | 3.69 | 9.49  | 11.19 | 9.32  | 5.84  |
| 8.43 | 8.55  | 8.85  | 9.88  | 3.72 | 9.48  | 10.78 | 9.07  | 5.47  |
| 9.1  | 8.16  | 8.82  | 9.36  | 3.28 | 8.74  | 9.31  | 9.24  | 4.4   |
| 8.46 | 8.03  | 9     | 9.55  | 3.86 | 9.19  | 10.12 | 9.1   | 5.47  |
| 9.13 | 8.22  | 9.03  | 9.6   | 2.52 | 9.28  | 9.62  | 9.37  | 5.33  |
| 8.56 | 7.72  | 9.4   | 9.19  | 0.71 | 9.21  | 9.4   | 9.49  | 4.71  |
| 8.89 | 6.77  | 9.87  | 9.3   | 6.41 | 8.9   | 9.71  | 8.59  | 5.69  |
| 8.92 | 8.27  | 9.39  | 9.95  | 2.38 | 11.2  | 10.85 | 9.21  | 6.52  |
| 9    | 8.87  | 9.16  | 9.96  | 2.93 | 11.14 | 10.74 | 8.88  | 6.76  |
| 8.92 | 8.24  | 9.03  | 10    | 4.17 | 10.82 | 10.98 | 9.21  | 5.86  |
| 8.36 | 7.58  | 8.78  | 9.73  | 4.15 | 9.58  | 11.2  | 9.13  | 4.62  |
| 8.4  | 8.19  | 9.55  | 9.69  | 3.1  | 9.11  | 10.84 | 8.39  | 5.08  |
| 8.7  | 6.79  | 9.79  | 9.67  | 3.69 | 9.49  | 10.79 | 8.55  | 5.27  |
| 8.95 | 7.29  | 9.91  | 9.55  | 2.74 | 9.25  | 10.68 | 8.48  | 5.07  |
| 7.83 | 7.14  | 9.24  | 8.52  | 4.64 | 9.41  | 9.13  | 8.1   | 4.32  |
| 7.67 | 7.7   | 9.48  | 8.57  | 1.48 | 9.62  | 9.36  | 8.25  | 3.98  |
| 7.45 | 7.52  | 9.48  | 8.56  | 0.22 | 9.73  | 9.12  | 7.96  | 4.54  |
| 7.44 | 7.76  | 9.15  | 8.75  | 1.82 | 10.16 | 9.73  | 7.85  | 3.9   |
| 7.5  | 6.67  | 7.95  | 9.65  | 3.86 | 8.69  | 11.73 | 10.35 | 5.45  |
| 8.42 | 8.49  | 8.64  | 9.42  | 3.9  | 8.98  | 10.14 | 8.6   | 5.71  |
| 8.32 | 8.47  | 8.7   | 9.41  | 3.7  | 9.67  | 10.24 | 8.74  | 6.04  |
| 8.41 | 7.76  | 8.72  | 9.3   | 3.39 | 9.44  | 10.15 | 8.59  | 5.59  |
| 9.17 | 8.48  | 9.51  | 10.37 | 3.8  | 9.91  | 11.62 | 9.57  | 5.63  |
| 8.59 | 8.68  | 9.57  | 10.38 | 3.92 | 8.88  | 11.4  | 9.17  | 6.37  |
| 9.01 | 9.05  | 9.73  | 10.19 | 3.67 | 9.24  | 11.28 | 9.14  | 5.74  |

<https://mc.manuscriptcentral.com/gut>

1  
2  
3  
4  
5  
6  
7  
8  
9  
10  
11  
12  
13  
14  
15  
16  
17  
18  
19  
20  
21  
22  
23  
24  
25  
26  
27  
28  
29  
30  
31  
32  
33  
34  
35  
36  
37  
38  
39  
40  
41  
42  
43  
44  
45  
46  
47  
48  
49  
50  
51  
52  
53  
54  
55  
56  
57  
58  
59  
60

|      |       |       |       |      |       |       |       |      |
|------|-------|-------|-------|------|-------|-------|-------|------|
| 9.11 | 8.51  | 9.79  | 10.31 | 3.99 | 9.32  | 11.4  | 9.23  | 6.08 |
| 8.87 | 8.2   | 9.13  | 9.7   | 3.03 | 10.05 | 10.93 | 9.32  | 4.89 |
| 9.02 | 8.37  | 9.59  | 9.75  | 2.51 | 10.54 | 10.85 | 9.05  | 5.89 |
| 9.07 | 8.24  | 9.64  | 9.88  | 1.95 | 10.71 | 11    | 9     | 5.31 |
| 9.14 | 8.26  | 9.64  | 9.77  | 3.97 | 10.29 | 10.86 | 9.09  | 4.49 |
| 9.42 | 8.83  | 9.09  | 10.1  | 5.04 | 9.5   | 10.89 | 8.86  | 6.42 |
| 9.29 | 9.4   | 9.04  | 10.28 | 1.25 | 9.76  | 11.23 | 9.29  | 7.04 |
| 9.35 | 9.69  | 9.12  | 10.24 | 0.59 | 8.52  | 11.43 | 9.26  | 5.6  |
| 9.35 | 9.29  | 9.24  | 10.24 | 2.76 | 9.15  | 10.9  | 9.31  | 5.8  |
| 8.73 | 8.63  | 9.89  | 9.67  | 3.04 | 8.95  | 10.41 | 9.33  | 5.14 |
| 8.78 | 8.41  | 9.32  | 9.84  | 2.86 | 9.65  | 10.8  | 9.53  | 5.83 |
| 8.66 | 8.36  | 9.51  | 9.71  | 2.4  | 9.23  | 10.63 | 9.43  | 5.43 |
| 8.66 | 8.37  | 9.48  | 9.65  | 3.44 | 9.01  | 10.57 | 9.39  | 4.88 |
| 6.74 | 7.96  | 8.32  | 8.61  | 6.15 | 8.74  | 9.06  | 11.2  | 5.15 |
| 7.3  | 7.11  | 10.09 | 9.88  | 3.6  | 9.34  | 11.39 | 10.61 | 5.25 |
| 7.7  | 7.12  | 9.99  | 9.63  | 1.28 | 9.01  | 10.46 | 9.6   | 4.45 |
| 7.03 | 7.62  | 11.72 | 9.92  | 2.24 | 9.6   | 7.35  | 10    | 0.24 |
| 7.3  | 7.4   | 11.31 | 9.39  | 0.77 | 9.19  | 8.42  | 10.03 | 0.77 |
| 8.94 | 8.57  | 9.62  | 10.05 | 1.72 | 8.4   | 10.57 | 8.91  | 5.75 |
| 8.89 | 9     | 9.64  | 9.99  | 2.07 | 7.96  | 10.52 | 9.04  | 4.75 |
| 8.94 | 8.49  | 9.7   | 9.93  | 1.99 | 8.24  | 10.47 | 9.03  | 4.37 |
| 9.25 | 8.75  | 9.03  | 10.24 | 4    | 10.29 | 11.22 | 9.29  | 6.33 |
| 9.34 | 8.67  | 9.24  | 10.19 | 3.6  | 10.27 | 11.36 | 9.12  | 5.14 |
| 9.55 | 7.46  | 10.04 | 9.67  | 3.05 | 9.86  | 11.12 | 8.39  | 5.37 |
| 9.16 | 10.07 | 9.91  | 10.93 | 4.88 | 10.67 | 11.38 | 9.63  | 6.44 |
| 8.82 | 9.77  | 10    | 10.88 | 4.29 | 11.19 | 11.29 | 9.7   | 6.23 |
| 8.98 | 9.49  | 10.36 | 10.95 | 5.39 | 10.94 | 11.39 | 9.88  | 6.33 |
| 8.11 | 7.87  | 9.5   | 9.62  | 2.68 | 9.64  | 10.31 | 9.24  | 5.11 |
| 7.84 | 7.49  | 9.42  | 9.46  | 0.98 | 9.8   | 10.19 | 9.5   | 4.89 |
| 7.97 | 7.47  | 9.61  | 9.48  | 3.47 | 9.61  | 10.19 | 9.28  | 5.11 |
| 8.57 | 8.4   | 9.95  | 9.87  | 3.82 | 9.4   | 10.63 | 9.23  | 5.61 |
| 8.27 | 8.52  | 9.74  | 9.85  | 2.2  | 8.38  | 10.62 | 9.45  | 4.72 |
| 8.2  | 8.33  | 9.69  | 9.81  | 1.99 | 8.73  | 10.56 | 9.25  | 5.08 |
| 8.64 | 7.52  | 9.2   | 9.99  | 3.31 | 8.79  | 10.29 | 9.19  | 5.12 |
| 8.49 | 8.3   | 9.42  | 9.98  | 2.69 | 8.77  | 10.17 | 9.13  | 5.37 |
| 8.62 | 7.19  | 9.5   | 10.15 | 3.24 | 9.5   | 10.36 | 9.23  | 5.54 |
| 8.79 | 7.55  | 9.74  | 9.13  | 4.44 | 9.86  | 9.79  | 8.92  | 5.24 |
| 8.79 | 7.55  | 9.74  | 9.13  | 4.44 | 9.86  | 9.79  | 8.92  | 5.24 |
| 8.27 | 7.84  | 9.51  | 9.37  | 2.96 | 9.52  | 10.15 | 9.26  | 4.85 |
| 8.6  | 7.78  | 9.79  | 9.24  | 3.5  | 9.55  | 10.11 | 9.2   | 4.88 |
| 8.55 | 7.51  | 9.77  | 9.36  | 2.86 | 9.52  | 10.05 | 9.14  | 4.64 |
| 8.66 | 7.23  | 10.12 | 8.97  | 4.88 | 8.93  | 9.11  | 8.58  | 5.8  |
| 8.35 | 8.47  | 9.65  | 9.42  | 6.84 | 9.64  | 10.05 | 8.56  | 6    |
| 8.39 | 8.92  | 9.21  | 9.49  | 8.4  | 9.69  | 10.13 | 8.82  | 6.27 |
| 8.39 | 7.81  | 9.92  | 9.23  | 6.47 | 9.12  | 9.97  | 8.83  | 4.7  |
| 8.79 | 8.25  | 8.12  | 10.03 | 2.53 | 8.81  | 11.2  | 9.89  | 5.37 |
| 8.74 | 8.63  | 7.1   | 10.03 | 0.08 | 8.64  | 11.18 | 9.81  | 5.54 |
| 8.53 | 8.08  | 8     | 10.13 | 3.69 | 8.59  | 11.55 | 10.39 | 5.52 |
| 8.73 | 7.23  | 9.88  | 8.82  | 3.86 | 9.1   | 9.28  | 8.58  | 5.06 |
| 8.61 | 7.15  | 9.74  | 9.11  | 4.87 | 9.05  | 10.02 | 9.11  | 5.47 |
| 8.6  | 7.03  | 9.7   | 9.08  | 4.16 | 8.5   | 9.89  | 8.88  | 5.1  |
| 8.4  | 7.95  | 9.72  | 9.1   | 1.4  | 8.58  | 9.77  | 8.24  | 4.79 |

<https://mc.manuscriptcentral.com/gut>



1  
2  
3  
4  
5  
6  
7  
8  
9  
10  
11  
12  
13  
14  
15  
16  
17  
18  
19  
20  
21  
22  
23  
24  
25  
26  
27  
28  
29  
30  
31  
32  
33  
34  
35  
36  
37  
38  
39  
40  
41  
42  
43  
44  
45  
46  
47  
48  
49  
50  
51  
52  
53  
54  
55  
56  
57  
58  
59  
60

|      |      |       |       |      |       |       |       |      |
|------|------|-------|-------|------|-------|-------|-------|------|
| 8.28 | 8.25 | 9.64  | 9.41  | 0.89 | 8.88  | 10.08 | 8.11  | 5.56 |
| 7.62 | 7.59 | 10.38 | 9.05  | 2.36 | 8.57  | 9.86  | 8.9   | 3.95 |
| 9.34 | 7.74 | 9.5   | 9.86  | 5.37 | 9.4   | 10.39 | 9.25  | 6.66 |
| 8.88 | 8.78 | 9.63  | 10.67 | 5.03 | 10.67 | 11.2  | 10.08 | 7.06 |
| 8.87 | 8.34 | 9.79  | 10.44 | 4.19 | 10.6  | 11.09 | 9.88  | 6.62 |
| 8.51 | 7.44 | 8.51  | 10.03 | 4.11 | 9.67  | 11.06 | 9.93  | 6.31 |
| 8.15 | 9.29 | 9.07  | 9.47  | 3.45 | 8.95  | 10.93 | 9.07  | 5.45 |
| 8.15 | 9.32 | 9.09  | 9.73  | 3.22 | 8.73  | 11.02 | 9.13  | 5.71 |
| 7.92 | 8.25 | 7.92  | 9.87  | 4.08 | 9.45  | 12.65 | 11.39 | 7.02 |
| 8.54 | 7.87 | 8.17  | 10.42 | 4.11 | 10.06 | 10.94 | 9.18  | 6.25 |
| 7.93 | 8.47 | 8.09  | 10.6  | 1.49 | 10.41 | 10.1  | 8.16  | 5.58 |
| 7.97 | 8.05 | 9.2   | 9.96  | 0    | 9.13  | 9.54  | 7.78  | 4.48 |
| 7.55 | 6.9  | 7.85  | 10.7  | 4.58 | 10.25 | 12.12 | 10.34 | 6.07 |
| 8.25 | 6.76 | 10.61 | 10.1  | 1.2  | 9.96  | 8.65  | 9.21  | 1.79 |
| 8.21 | 7.1  | 8.18  | 11.46 | 1.53 | 9.94  | 10.9  | 9.02  | 5.23 |
| 8.27 | 7.3  | 7.85  | 11.52 | 1.83 | 9.94  | 11    | 8.93  | 5.88 |
| 8.32 | 7.12 | 8.28  | 11.36 | 3.43 | 9.89  | 10.84 | 9.06  | 5.38 |
| 8.92 | 8.32 | 9.5   | 10.35 | 3.43 | 9.07  | 10.08 | 9.1   | 5.08 |
| 8.3  | 7.2  | 9.84  | 9.78  | 2.23 | 8.62  | 9.9   | 9.13  | 3.63 |
| 8.77 | 7.31 | 10.03 | 10.02 | 3.4  | 9.03  | 10.5  | 9.4   | 4.79 |
| 6.75 | 6.75 | 7.97  | 8.16  | 5.16 | 8.86  | 11.86 | 12.52 | 6.75 |
| 8.3  | 9.37 | 7.96  | 9.73  | 2.83 | 8.88  | 10.05 | 8.68  | 5.83 |
| 8.53 | 9.13 | 8.6   | 9.67  | 3.54 | 9.28  | 10.32 | 9.05  | 5.78 |
| 7.48 | 7.84 | 8.12  | 10.66 | 3.99 | 8.84  | 11.27 | 10.25 | 5.43 |
| 7.97 | 7.28 | 8.08  | 10.58 | 3.71 | 9.48  | 11.85 | 10.51 | 6.66 |
| 8.33 | 7.51 | 8.47  | 10.51 | 4.35 | 9.73  | 11.04 | 9.93  | 6.07 |
| 8.16 | 6.97 | 10.22 | 8.93  | 2    | 9.02  | 8.67  | 8.94  | 3    |
| 8    | 7.16 | 10.31 | 8.37  | 2.86 | 8.61  | 8.18  | 8.64  | 3.86 |
| 7.85 | 7.32 | 10.22 | 8.19  | 2.77 | 8.37  | 7.79  | 8.16  | 2.77 |
| 8.09 | 7.81 | 8.03  | 9.12  | 3.33 | 9.08  | 9.57  | 8.36  | 5.01 |
| 8.16 | 6.39 | 8.46  | 9.21  | 3.18 | 8.96  | 9.84  | 8.78  | 5.86 |
| 7.69 | 8.14 | 7.9   | 9.28  | 3.43 | 9.07  | 10.04 | 8.85  | 5.99 |
| 8.05 | 6.77 | 8.22  | 9.08  | 5.16 | 9.39  | 10.09 | 8.79  | 6.01 |
| 6.96 | 6.18 | 9.52  | 8.14  | 0.45 | 7.99  | 8.65  | 8.17  | 3.26 |
| 7.25 | 6.52 | 9.54  | 8.06  | 0.25 | 7.9   | 7.93  | 7.52  | 2.25 |
| 6.94 | 6.54 | 9.16  | 8.3   | 1.34 | 7.75  | 8.2   | 8.07  | 2.8  |
| 6.6  | 6.79 | 10.24 | 8.17  | 0    | 8.3   | 6.06  | 8.23  | 0    |
| 7.12 | 6.89 | 9.66  | 7.74  | 1.34 | 7.68  | 7.51  | 7.71  | 4.34 |
| 7    | 6.74 | 9.8   | 8.04  | 1.1  | 7.81  | 7.89  | 7.33  | 3.9  |
| 7.08 | 6.54 | 9.72  | 8.17  | 1.89 | 7.77  | 7.89  | 7.82  | 4.01 |
| 4.41 | 5    | 10.27 | 8.34  | 2.41 | 6.93  | 5.22  | 8.5   | 2.41 |
| 8.13 | 7.1  | 10.41 | 8.96  | 1.06 | 8.64  | 8.61  | 8.58  | 3.64 |
| 8.47 | 7.77 | 10.68 | 8.76  | 0.91 | 8.89  | 8.47  | 8.84  | 3.65 |
| 7.66 | 7.45 | 9.59  | 10.11 | 0.87 | 8.41  | 10.52 | 9.05  | 2.45 |
| 7.72 | 7.42 | 10.28 | 9.62  | 1.33 | 8.61  | 9.13  | 8.57  | 2.56 |
| 8.01 | 6.91 | 9.72  | 9.33  | 2.3  | 8.85  | 9.52  | 8.76  | 4.34 |
| 8.18 | 7.1  | 10.18 | 9.29  | 1.3  | 9.08  | 8.85  | 8.83  | 4.1  |
| 8.45 | 7.13 | 10.36 | 8.58  | 0.71 | 9.1   | 7.59  | 8.09  | 3.88 |
| 7.93 | 7.11 | 10.62 | 9.33  | 1.48 | 8.9   | 8.21  | 8.85  | 2.48 |
| 7.74 | 7.81 | 9.98  | 8.89  | 2.23 | 9.26  | 8.84  | 8.22  | 4.3  |
| 7.97 | 8.01 | 9.84  | 9.02  | 1.33 | 9.18  | 9.31  | 8.44  | 4.79 |
| 7.91 | 8.12 | 9.76  | 9.11  | 3.21 | 9.14  | 9.2   | 8.71  | 5.04 |

<https://mc.manuscriptcentral.com/gut>

1  
2  
3  
4  
5  
6  
7  
8  
9  
10  
11  
12  
13  
14  
15  
16  
17  
18  
19  
20  
21  
22  
23  
24  
25  
26  
27  
28  
29  
30  
31  
32  
33  
34  
35  
36  
37  
38  
39  
40  
41  
42  
43  
44  
45  
46  
47  
48  
49  
50  
51  
52  
53  
54  
55  
56  
57  
58  
59  
60

|      |      |       |       |      |       |       |       |      |
|------|------|-------|-------|------|-------|-------|-------|------|
| 8.04 | 7.87 | 10.13 | 9.11  | 2.27 | 9.32  | 8.62  | 8.68  | 3.73 |
| 8.89 | 8.1  | 9.39  | 10.04 | 4.22 | 10.13 | 11.66 | 9.82  | 5.94 |
| 8.73 | 8.5  | 9.43  | 10.03 | 4.41 | 10.18 | 11.5  | 9.81  | 6.3  |
| 8.2  | 8.46 | 9.34  | 9.68  | 2.33 | 9.34  | 11.17 | 9.43  | 4.33 |
| 8.4  | 8.2  | 9.24  | 9.75  | 1.54 | 9.28  | 11.27 | 9.51  | 5.73 |
| 9.13 | 7.48 | 10    | 10.08 | 4.41 | 9.76  | 10.41 | 9.59  | 5.29 |
| 8.5  | 8.67 | 8.98  | 10.39 | 4.01 | 9.3   | 11.52 | 10.28 | 6.09 |
| 8.72 | 8.72 | 9.03  | 10.1  | 3.68 | 9.07  | 11.2  | 9.64  | 5.84 |
| 8.99 | 7.48 | 9.23  | 10.34 | 5.44 | 9.39  | 11.6  | 10.53 | 6.65 |
| 9.33 | 9.22 | 9.66  | 10.83 | 4.09 | 9.65  | 11.1  | 10.67 | 6.38 |
| 9.46 | 8.43 | 9.58  | 10.23 | 4.07 | 9.82  | 11.4  | 9.7   | 6.14 |
| 9.43 | 8.61 | 9.68  | 10.29 | 3.19 | 9.86  | 11.44 | 9.66  | 6.43 |
| 9.39 | 8.58 | 9.58  | 10.34 | 3.06 | 9.69  | 11.35 | 9.83  | 6.11 |
| 8.33 | 8.44 | 9.08  | 9.75  | 2.28 | 8.87  | 10.42 | 9.04  | 4.84 |
| 8.6  | 8.96 | 8.82  | 10.01 | 2.83 | 9.5   | 10.82 | 9.3   | 6.22 |
| 8.37 | 7.48 | 9.29  | 9.57  | 3.32 | 9.35  | 11    | 9.87  | 6.08 |
| 9.49 | 7.28 | 8.82  | 9.88  | 6.22 | 9.61  | 10.81 | 9.19  | 6.49 |
| 8.57 | 8.62 | 8.96  | 9.99  | 4.57 | 9.06  | 11    | 9.33  | 6.09 |
| 8.7  | 7.61 | 8.97  | 10.07 | 4.77 | 9.44  | 10.79 | 9.53  | 6.61 |
| 9.27 | 8.28 | 8.86  | 9.74  | 3.39 | 9.11  | 10.91 | 9.09  | 5.48 |
| 8.09 | 7.8  | 8.81  | 10.2  | 1.87 | 9.35  | 10.78 | 8.99  | 5.79 |
| 8.45 | 8.12 | 8.44  | 10.01 | 2.06 | 8.77  | 10.39 | 8.95  | 5.12 |
| 8.55 | 7.89 | 9.25  | 9.76  | 3.11 | 10.47 | 10.35 | 8.94  | 5.69 |
| 8.73 | 8.16 | 9.07  | 10.27 | 2.51 | 10.66 | 10.57 | 8.62  | 5.74 |
| 7.54 | 6.61 | 8.7   | 10.17 | 5.47 | 11.3  | 11.8  | 10.53 | 6.85 |
| 8.51 | 6.67 | 8.05  | 8.95  | 4.61 | 8.94  | 9.5   | 8.28  | 5.27 |
| 7.77 | 7.2  | 8.99  | 8.73  | 4.6  | 8.85  | 9.25  | 8.04  | 4.88 |
| 7.38 | 6.98 | 8.67  | 8.94  | 1.76 | 8.36  | 9.29  | 7.94  | 4.41 |
| 8.15 | 7.22 | 9.01  | 9.78  | 4.48 | 9.29  | 9.28  | 8.57  | 5.81 |
| 7.25 | 6.22 | 9.57  | 7.97  | 1.76 | 7.93  | 7.49  | 7.87  | 3.76 |
| 7.09 | 6.3  | 9.27  | 8.36  | 0.72 | 7.74  | 8.54  | 8     | 4.53 |
| 7.15 | 6.41 | 9.58  | 6.93  | 0.88 | 7.8   | 7.29  | 7.78  | 3.69 |
| 7.15 | 6.45 | 9.4   | 7.97  | 0.96 | 7.72  | 7.68  | 7.7   | 3.96 |
| 7.4  | 7.5  | 8.26  | 7.92  | 1.68 | 7.95  | 9.31  | 7.39  | 3.94 |
| 7.53 | 7.16 | 8.57  | 7.73  | 2.66 | 7.8   | 8.81  | 7.44  | 4.18 |
| 7.49 | 6.74 | 8.61  | 7.78  | 1.35 | 7.87  | 9.07  | 7.62  | 4.35 |
| 7.23 | 6.61 | 8.51  | 8.12  | 1.49 | 8.38  | 9.16  | 7.81  | 3.97 |
| 9.64 | 6.08 | 8.83  | 9.91  | 6.08 | 9.33  | 10.84 | 8.7   | 5.71 |
| 8.49 | 8.08 | 9.08  | 9.62  | 1.46 | 9.27  | 10.44 | 9.38  | 5.16 |
| 8.28 | 8.97 | 8.81  | 10.34 | 3.42 | 9.5   | 11.27 | 9.74  | 5.63 |
| 7.32 | 7.19 | 7.82  | 10.36 | 4.55 | 9.85  | 12.39 | 11.55 | 6.55 |
| 8.56 | 8.19 | 8.94  | 9.96  | 2.4  | 8.58  | 10.26 | 8.94  | 4.5  |
| 7.32 | 7.97 | 7.97  | 9.83  | 4.51 | 9.68  | 12.39 | 11.15 | 7.1  |
| 8.43 | 8.69 | 8.99  | 10.14 | 5.19 | 9.04  | 11.02 | 9.07  | 6.08 |
| 8.37 | 8.4  | 8.89  | 10.31 | 4.26 | 9.19  | 11    | 9.13  | 4.94 |
| 8.17 | 8.51 | 8.46  | 9.35  | 0.68 | 7.75  | 10.71 | 7.99  | 4    |
| 8.14 | 7.64 | 8.97  | 9.58  | 2.57 | 9.02  | 10.87 | 8.82  | 4.94 |
| 8.31 | 7.02 | 8.71  | 9.55  | 2.6  | 8.57  | 10.83 | 8.28  | 4.67 |
| 8.33 | 7.42 | 9.01  | 9.28  | 3.84 | 8.7   | 10.48 | 8.49  | 5.01 |
| 8.11 | 7.21 | 7.98  | 9.38  | 4.33 | 9.8   | 10.11 | 8.58  | 5.13 |
| 7.89 | 6.85 | 8.24  | 8.92  | 2.53 | 9.53  | 9.32  | 7.99  | 4.23 |
| 7.53 | 7.1  | 8.37  | 8.55  | 3.64 | 9.26  | 9.16  | 7.88  | 5    |

<https://mc.manuscriptcentral.com/gut>

1  
2  
3  
4  
5  
6  
7  
8  
9  
10  
11  
12  
13  
14  
15  
16  
17  
18  
19  
20  
21  
22  
23  
24  
25  
26  
27  
28  
29  
30  
31  
32  
33  
34  
35  
36  
37  
38  
39  
40  
41  
42  
43  
44  
45  
46  
47  
48  
49  
50  
51  
52  
53  
54  
55  
56  
57  
58  
59  
60

|      |      |      |      |      |      |       |      |      |
|------|------|------|------|------|------|-------|------|------|
| 7.36 | 6.74 | 7.72 | 9.03 | 3.96 | 9.66 | 10.15 | 8.76 | 4.37 |
| 7.08 | 6.62 | 8.12 | 8.9  | 2.68 | 8.1  | 10.16 | 8.46 | 3.42 |
| 7.16 | 7.27 | 8.46 | 8.64 | 0.59 | 8.62 | 9.59  | 7.61 | 4.05 |
| 7.57 | 7.54 | 8.53 | 8.63 | 0.49 | 8.24 | 9.67  | 7.74 | 3.66 |
| 7.25 | 5.88 | 9.2  | 7.8  | 2.55 | 8.25 | 9.39  | 8.39 | 3.14 |
| 7.89 | 7.78 | 8.74 | 8.96 | 1.89 | 9.65 | 10.13 | 8.38 | 4.15 |
| 7.51 | 7.74 | 8.21 | 8.89 | 1.07 | 7.41 | 10.13 | 8.03 | 3.07 |
| 7.38 | 7.71 | 8.14 | 9.04 | 1.35 | 7.4  | 10.23 | 8.08 | 3.67 |
| 7.13 | 6.61 | 9.78 | 7.7  | 0.27 | 8.04 | 7.73  | 7.89 | 2.59 |
| 7.92 | 7.09 | 9.41 | 8.39 | 2.87 | 8.24 | 9.21  | 8.15 | 4.69 |
| 8.5  | 7.18 | 8.61 | 9.43 | 3.97 | 8.72 | 10.48 | 8.41 | 4.74 |
| 8.02 | 7.3  | 8.8  | 9.22 | 6.44 | 8.4  | 10.13 | 8.44 | 4.47 |
| 8.31 | 7.22 | 8.55 | 9.31 | 6.32 | 8.51 | 10.44 | 8.77 | 5.43 |
| 8.31 | 6.37 | 8.91 | 9.27 | 3.59 | 8.66 | 10.15 | 8.68 | 4.45 |
| 6.45 | 7.24 | 6.54 | 9.72 | 4.13 | 9.08 | 12.42 | 11.6 | 4.54 |
| 7.87 | 7.97 | 8.68 | 9.25 | 3.26 | 8.86 | 10.4  | 8.79 | 3.71 |
| 7.89 | 7.38 | 8.9  | 8.76 | 3.48 | 8.76 | 9.53  | 8.17 | 3.4  |
| 7.99 | 7.57 | 8.39 | 9.4  | 3.34 | 8.78 | 10.6  | 9.22 | 4.71 |

## Gut

|    | ROCK1 | ROCK2 | RORA | RORB | RPS27A | RPS6KB1 | RPS6KB2 | RRAS | RTN4  |
|----|-------|-------|------|------|--------|---------|---------|------|-------|
| 1  |       |       |      |      |        |         |         |      |       |
| 2  |       |       |      |      |        |         |         |      |       |
| 3  | 9.12  | 7.84  | 6.38 | 3.65 | 12.79  | 8.12    | 6.49    | 6.2  | 9.3   |
| 4  | 9.15  | 9.22  | 6.85 | 3.64 | 12.92  | 8.15    | 7.18    | 6.71 | 10.35 |
| 5  | 9.05  | 8.82  | 7.16 | 3.78 | 12.95  | 8.14    | 7.5     | 6.4  | 10.23 |
| 6  | 10    | 9.92  | 7.49 | 3.35 | 13.77  | 8.37    | 7.98    | 7.69 | 10.63 |
| 7  | 9.04  | 6.68  | 7.64 | 3.59 | 11.04  | 7.95    | 6.44    | 3.01 | 8.83  |
| 8  | 8.93  | 8.66  | 6.64 | 3.08 | 12.35  | 8.06    | 6.72    | 6.32 | 9.92  |
| 9  | 9.03  | 8.79  | 6.52 | 3.09 | 12.37  | 8.26    | 6.91    | 6.29 | 9.94  |
| 10 | 10.2  | 9.86  | 7.12 | 2.72 | 13.64  | 8.36    | 8.48    | 8.06 | 10.15 |
| 11 | 9.66  | 9.32  | 7.04 | 1.95 | 13.6   | 8.56    | 8.27    | 7.97 | 9.9   |
| 12 | 9.41  | 9.34  | 6    | 3.37 | 13.16  | 7.86    | 6.65    | 6.66 | 9.72  |
| 13 | 9.55  | 9.69  | 6.31 | 2.96 | 13.59  | 8.36    | 7.79    | 7.29 | 9.99  |
| 14 | 9.96  | 9.78  | 6.41 | 3    | 13.58  | 8.53    | 7.6     | 7.74 | 10.35 |
| 15 | 9.61  | 9.79  | 5.99 | 2.99 | 13.59  | 7.76    | 7.06    | 6.07 | 11.41 |
| 16 | 9.74  | 9.73  | 6.57 | 4.2  | 13.52  | 7.86    | 7.06    | 6.33 | 11.33 |
| 17 | 10.76 | 11.11 | 7.81 | 3.35 | 14.9   | 8.54    | 9.83    | 7.86 | 9.14  |
| 18 | 9.33  | 9.32  | 7.05 | 2.94 | 13.31  | 8.05    | 7.48    | 6.64 | 9.83  |
| 19 | 9.73  | 9.49  | 7.44 | 3.87 | 13.21  | 8.12    | 7.65    | 7.17 | 10.34 |
| 20 | 9.62  | 9.57  | 7.38 | 3.93 | 13.13  | 8.39    | 7.41    | 7.3  | 10.12 |
| 21 | 10.74 | 10.4  | 8.1  | 3.22 | 14.51  | 8.98    | 8.85    | 8.1  | 9.33  |
| 22 | 9.8   | 9.7   | 7.53 | 3.31 | 13.93  | 8.83    | 8.1     | 7.44 | 10.2  |
| 23 | 10.3  | 9.83  | 7.9  | 2.67 | 13.92  | 8.96    | 8.12    | 8.03 | 10.17 |
| 24 | 10.07 | 11.43 | 7.18 | 3.15 | 13.94  | 9.19    | 8.08    | 8.33 | 11.02 |
| 25 | 10.17 | 11.53 | 7.16 | 3.52 | 13.95  | 8.91    | 8.18    | 8.3  | 11.08 |
| 26 | 10.18 | 11.17 | 7.54 | 4.14 | 13.76  | 9.01    | 7.87    | 8.49 | 11.23 |
| 27 | 9.63  | 8.81  | 6.8  | 1.43 | 14.44  | 7.72    | 8.85    | 6.6  | 9.24  |
| 28 | 9.42  | 10.05 | 4.77 | 2.13 | 13.91  | 8.83    | 8.68    | 8.03 | 9.22  |
| 29 | 9.29  | 10.1  | 5.33 | 3.11 | 13.74  | 8.83    | 8.54    | 8.34 | 9.93  |
| 30 | 9.27  | 9.33  | 6.29 | 3.62 | 13.26  | 8.47    | 8.08    | 7.51 | 9.37  |
| 31 | 8.87  | 9.21  | 7.15 | 3.02 | 13.15  | 7.97    | 7.74    | 6.84 | 9.47  |
| 32 | 9.18  | 9.1   | 6.74 | 1.77 | 13.09  | 7.99    | 7.59    | 6.64 | 9.57  |
| 33 | 8.88  | 9.23  | 7.38 | 3.37 | 13.19  | 8.12    | 7.69    | 6.54 | 9.72  |
| 34 | 9.3   | 8.74  | 7.38 | 3.71 | 12.9   | 8.03    | 7.58    | 6.69 | 9.16  |
| 35 | 9.54  | 8.29  | 7.29 | 3.43 | 13.4   | 8.4     | 6.75    | 5.88 | 9.36  |
| 36 | 10.16 | 9.65  | 6.66 | 3.06 | 13.85  | 8.79    | 7.67    | 7.63 | 10.49 |
| 37 | 10.09 | 9.8   | 6.38 | 2.78 | 14.06  | 8.91    | 7.97    | 7.38 | 9.85  |
| 38 | 10.2  | 9.86  | 7.06 | 2.06 | 14.12  | 8.7     | 8.16    | 7.6  | 9.97  |
| 39 | 9.55  | 8.45  | 6.87 | 0.45 | 14.11  | 8.41    | 7.63    | 7.06 | 9.3   |
| 40 | 9.11  | 8.99  | 6.6  | 3.21 | 13.66  | 8.48    | 7.36    | 6.72 | 9.8   |
| 41 | 9.32  | 8.94  | 7.42 | 1.37 | 13.44  | 8.41    | 7.34    | 6.81 | 9.45  |
| 42 | 9.39  | 8.65  | 7.34 | 3.2  | 13.53  | 8.37    | 7.15    | 6.66 | 9.59  |
| 43 | 9.38  | 7.83  | 6.6  | 2.32 | 11.89  | 7.14    | 5.82    | 5.66 | 8.83  |
| 44 | 9.48  | 7.95  | 6.15 | 1.48 | 11.81  | 7.31    | 5.8     | 5.39 | 8.82  |
| 45 | 9.34  | 7.68  | 6.22 | 3.39 | 11.72  | 7.36    | 5.64    | 5.35 | 8.74  |
| 46 | 9.6   | 8.2   | 5.98 | 2.82 | 12.24  | 7.33    | 5.84    | 6.15 | 8.81  |
| 47 | 10.57 | 9.8   | 6.86 | 3.86 | 14.87  | 8.22    | 10.01   | 7.5  | 8.18  |
| 48 | 9.33  | 9.06  | 6.62 | 4.12 | 13.7   | 8.47    | 7.57    | 7.26 | 9.98  |
| 49 | 9.41  | 9.22  | 6.7  | 4.86 | 13.67  | 8.45    | 7.27    | 7.72 | 10.17 |
| 50 | 9.42  | 9.36  | 7.17 | 3.62 | 13.4   | 8.42    | 7.12    | 7.63 | 10.46 |
| 51 | 10.28 | 10.75 | 6.99 | 1.63 | 14.41  | 8.57    | 8.42    | 8.51 | 11.07 |
| 52 | 9.95  | 10.4  | 6.2  | 3.33 | 13.95  | 8.49    | 7.96    | 8.14 | 11.37 |
| 53 | 10.19 | 10.19 | 6.47 | 2.08 | 14.19  | 8.59    | 7.68    | 7.6  | 11.12 |

<https://mc.manuscriptcentral.com/gut>

|    |       |       |      |      |       |      |       |      |       |
|----|-------|-------|------|------|-------|------|-------|------|-------|
| 1  |       |       |      |      |       |      |       |      |       |
| 2  | 10.06 | 10.26 | 6.38 | 3.4  | 13.97 | 8.66 | 7.81  | 8.07 | 11.46 |
| 3  | 9.13  | 10.59 | 6.44 | 3.62 | 14.01 | 9.05 | 7.59  | 6.63 | 10.92 |
| 4  | 9.25  | 10.48 | 6.6  | 3.19 | 13.98 | 8.66 | 7.53  | 7.14 | 11.33 |
| 5  | 9.62  | 10.79 | 6.51 | 3.41 | 14.12 | 8.92 | 7.63  | 7.07 | 11.01 |
| 6  | 9.21  | 10.28 | 6.39 | 3.43 | 13.92 | 8.77 | 7.39  | 6.93 | 11.24 |
| 7  | 9.92  | 9.52  | 6.97 | 2.81 | 14.52 | 8.78 | 7.93  | 7.5  | 10.32 |
| 8  | 10.82 | 9.92  | 6.38 | 2.57 | 14.26 | 8.92 | 8.05  | 7.61 | 10.71 |
| 9  | 11.13 | 9.83  | 4.53 | 2    | 14.28 | 8.86 | 8.3   | 7.3  | 10.2  |
| 10 | 11.03 | 10.1  | 6.48 | 3.25 | 14.24 | 9.18 | 8.32  | 7.8  | 10.74 |
| 11 | 9.65  | 9.17  | 6.94 | 1.17 | 13.44 | 8.47 | 7.24  | 6.01 | 10.04 |
| 12 | 9.74  | 9.96  | 6.92 | 3.35 | 13.52 | 8.48 | 8.02  | 6.54 | 10.12 |
| 13 | 9.76  | 10.06 | 6.39 | 2.82 | 13.6  | 8.43 | 8.06  | 6.49 | 10.06 |
| 14 | 9.85  | 9.82  | 6.17 | 3.44 | 13.54 | 8.55 | 8.05  | 6.32 | 10.15 |
| 15 | 9.67  | 9.15  | 7.15 | 6.74 | 12.87 | 7.74 | 10.61 | 6.15 | 9.91  |
| 16 | 9.73  | 9.83  | 7.09 | 3.96 | 14.24 | 8.48 | 9.36  | 7.62 | 9.47  |
| 17 | 9.02  | 9.24  | 7.11 | 3.36 | 13.56 | 8.47 | 8.39  | 6.84 | 9.51  |
| 18 | 9.57  | 8.28  | 8.4  | 6.13 | 11.48 | 8.72 | 7.32  | 1.83 | 9.79  |
| 19 | 9.22  | 8     | 7.92 | 6.06 | 11.83 | 8.13 | 7.83  | 3.36 | 9.65  |
| 20 | 9.17  | 9.81  | 5.66 | 3.72 | 13.49 | 8.38 | 7.94  | 5.6  | 9.69  |
| 21 | 9.12  | 9.77  | 5.85 | 3.72 | 13.58 | 8.28 | 7.75  | 5.7  | 10.09 |
| 22 | 9.25  | 9.56  | 6.49 | 3.48 | 13.4  | 8.31 | 7.63  | 5.8  | 9.65  |
| 23 | 9.27  | 10.52 | 6.35 | 3.42 | 14.55 | 8.83 | 8.08  | 7.5  | 10.79 |
| 24 | 9.52  | 10.27 | 6.39 | 3.45 | 14.29 | 8.74 | 8.01  | 7.28 | 10.36 |
| 25 | 9.59  | 9.99  | 6.96 | 4.05 | 13.79 | 8.69 | 7.33  | 6.88 | 9.88  |
| 26 | 10.07 | 9.89  | 7.79 | 3.64 | 14.24 | 9.2  | 8.39  | 7.54 | 10.49 |
| 27 | 10.17 | 10.08 | 7.93 | 2.85 | 14.34 | 9.3  | 8.18  | 8.13 | 10.66 |
| 28 | 10.16 | 10.05 | 7.7  | 4.28 | 14.46 | 9.29 | 8.12  | 8.25 | 10.78 |
| 29 | 8.93  | 10.02 | 5.91 | 4.17 | 14.3  | 9.01 | 7.74  | 6    | 10.4  |
| 30 | 8.84  | 10.06 | 6.19 | 2.56 | 14.26 | 9.03 | 7.86  | 6.13 | 10.58 |
| 31 | 8.98  | 9.94  | 6.56 | 3.32 | 14.23 | 8.82 | 7.7   | 6.08 | 10.5  |
| 32 | 9.64  | 10.53 | 6.73 | 3.12 | 13.77 | 8.39 | 7.52  | 7.47 | 11.55 |
| 33 | 9.54  | 10.69 | 6.15 | 2.78 | 14.01 | 8.39 | 7.62  | 7.51 | 11.56 |
| 34 | 9.51  | 10.36 | 6.59 | 3.16 | 13.7  | 8.35 | 7.75  | 7.56 | 11.13 |
| 35 | 8.95  | 9.08  | 6.28 | 3.98 | 13.46 | 8.95 | 7.15  | 7.79 | 10.58 |
| 36 | 8.91  | 9.07  | 6.67 | 3.2  | 13.51 | 9.06 | 7.24  | 7.7  | 10.4  |
| 37 | 9.16  | 9.19  | 6.69 | 3.38 | 13.38 | 8.84 | 7.09  | 7.86 | 10.56 |
| 38 | 9.33  | 8.49  | 7.37 | 4.14 | 12.85 | 8.19 | 6.83  | 6.57 | 9.95  |
| 39 | 9.33  | 8.49  | 7.37 | 4.14 | 12.85 | 8.19 | 6.83  | 6.57 | 9.95  |
| 40 | 9.61  | 9.22  | 6.82 | 4.24 | 13.3  | 8.62 | 7.43  | 7.31 | 10.04 |
| 41 | 9.59  | 9.18  | 7.04 | 4.5  | 13.01 | 8.41 | 6.84  | 7.73 | 10.37 |
| 42 | 9.63  | 9.08  | 7.07 | 4.08 | 12.98 | 8.59 | 6.77  | 7.63 | 10.53 |
| 43 | 8.99  | 8.17  | 7.08 | 4.01 | 12.57 | 8.1  | 6.64  | 5.31 | 9.35  |
| 44 | 9.23  | 9.31  | 6.67 | 4    | 12.83 | 8.33 | 7.43  | 6.08 | 10.18 |
| 45 | 9.68  | 9.95  | 6.32 | 3.41 | 13.19 | 8.4  | 7.67  | 6.42 | 10.15 |
| 46 | 9.43  | 9.12  | 7.02 | 4.07 | 12.67 | 8.06 | 7.02  | 6.84 | 9.79  |
| 47 | 9.86  | 10.33 | 6.3  | 2.73 | 13.97 | 8.41 | 7.95  | 7.65 | 10.89 |
| 48 | 9.75  | 10.58 | 4.83 | 2.66 | 14.02 | 8.41 | 8.1   | 7.47 | 11.13 |
| 49 | 10.34 | 10.4  | 6.35 | 0.52 | 14.21 | 8.47 | 8.67  | 7.78 | 10.61 |
| 50 | 9.09  | 7.96  | 7    | 3.61 | 12.56 | 7.99 | 6.58  | 5.83 | 9.27  |
| 51 | 9.32  | 8.98  | 6.76 | 4.18 | 12.71 | 7.96 | 6.81  | 7.32 | 9.89  |
| 52 | 9.2   | 8.9   | 6.96 | 3.46 | 12.74 | 8    | 6.8   | 7.26 | 9.88  |
| 53 | 8.81  | 8.38  | 6.26 | 4.2  | 12.27 | 7.83 | 6.75  | 6.84 | 9.12  |

<https://mc.manuscriptcentral.com/gut>

1  
2  
3  
4  
5  
6  
7  
8  
9  
10  
11  
12  
13  
14  
15  
16  
17  
18  
19  
20  
21  
22  
23  
24  
25  
26  
27  
28  
29  
30  
31  
32  
33  
34  
35  
36  
37  
38  
39  
40  
41  
42  
43  
44  
45  
46  
47  
48  
49  
50  
51  
52  
53  
54  
55  
56  
57  
58  
59  
60

|       |       |      |      |       |      |       |      |       |
|-------|-------|------|------|-------|------|-------|------|-------|
| 8.92  | 8.6   | 6.36 | 4.14 | 12.34 | 7.8  | 6.57  | 7    | 9.67  |
| 9.31  | 8.36  | 7.09 | 5.1  | 12.1  | 7.84 | 7.01  | 7.2  | 8.87  |
| 9.83  | 9.46  | 7.01 | 2.25 | 13.45 | 8.37 | 7.55  | 6.84 | 9.72  |
| 10.01 | 9.57  | 7.29 | 4.66 | 13.5  | 8.82 | 8.04  | 7.51 | 10.83 |
| 10.28 | 9.82  | 7.43 | 3.49 | 13.04 | 8.56 | 7.66  | 7.81 | 10.8  |
| 9.95  | 9.56  | 6.95 | 2.41 | 14.34 | 9.03 | 8.55  | 8.13 | 9.96  |
| 9.5   | 9.68  | 5.43 | 3.13 | 13.76 | 8.42 | 7.4   | 7.73 | 10.64 |
| 9.51  | 9.78  | 5.56 | 3.08 | 13.93 | 8.55 | 7.58  | 7.71 | 10.74 |
| 11.12 | 10.81 | 7.45 | 4.08 | 15.34 | 8.45 | 10.06 | 9.28 | 9.78  |
| 10.12 | 9.62  | 7.13 | 2.38 | 13.85 | 8.49 | 8.07  | 8.25 | 9.41  |
| 9.83  | 9.69  | 6.35 | 3.08 | 13.65 | 8.28 | 7.39  | 7.93 | 9.55  |
| 8.85  | 8.73  | 6.2  | 3.21 | 12.58 | 8.04 | 6.55  | 6.52 | 9.39  |
| 11.27 | 10.41 | 7.17 | 2.26 | 14.69 | 8.37 | 9.51  | 9.39 | 9.17  |
| 8.26  | 7.53  | 7.95 | 5.2  | 11.53 | 8.22 | 5.87  | 0.2  | 9.82  |
| 8.17  | 10.05 | 5.78 | 1.95 | 13.79 | 7.55 | 7.26  | 6.3  | 11.29 |
| 7.96  | 10.18 | 5.59 | 2.16 | 13.83 | 7.56 | 7.38  | 5.67 | 11.46 |
| 8.22  | 10.15 | 6.25 | 1.52 | 13.75 | 7.72 | 7.2   | 6.43 | 11.23 |
| 9.67  | 9.19  | 7.09 | 3.83 | 12.98 | 8.62 | 7.39  | 7.17 | 10.35 |
| 9.1   | 8.59  | 6.68 | 3.16 | 12.31 | 8.08 | 6.88  | 6.77 | 9.79  |
| 9.39  | 8.89  | 6.75 | 3.72 | 12.52 | 8.33 | 7.17  | 7.25 | 10.26 |
| 12.03 | 9.41  | 6.16 | 6.75 | 15.34 | 6.75 | 12.92 | 7.75 | 7.49  |
| 9.2   | 9.27  | 6.19 | 2.72 | 13.33 | 8.4  | 7.48  | 7.16 | 9.39  |
| 9.48  | 9.18  | 6.66 | 2.12 | 13.24 | 8.4  | 7.44  | 7.18 | 9.47  |
| 10.16 | 9.81  | 6.47 | 2.77 | 13.88 | 8.24 | 8.11  | 8.47 | 9.78  |
| 10.46 | 9.99  | 7.1  | 2.91 | 14.22 | 8.37 | 8.92  | 8.55 | 9.78  |
| 10.03 | 9.59  | 6.86 | 4    | 13.41 | 8.59 | 7.69  | 8.17 | 10.12 |
| 8.92  | 7.17  | 6.93 | 4.17 | 11.29 | 7.74 | 6.04  | 4.17 | 8.56  |
| 8.45  | 6.83  | 7.07 | 4.44 | 11.03 | 7.57 | 5.95  | 4.18 | 8.64  |
| 8.41  | 6.52  | 6.94 | 4.09 | 10.88 | 7.77 | 4.94  | 2.77 | 8.87  |
| 8.56  | 8.22  | 5.87 | 0.01 | 12.35 | 7.59 | 5.84  | 6.89 | 9.51  |
| 8.79  | 8.81  | 5.84 | 3.05 | 12.71 | 7.52 | 5.93  | 7.27 | 9.36  |
| 8.8   | 8.6   | 5.69 | 2.43 | 12.94 | 7.36 | 6.97  | 7.51 | 9.44  |
| 8.77  | 8.94  | 6.38 | 4.24 | 12.75 | 7.46 | 6.01  | 7.46 | 10.14 |
| 8.32  | 6.88  | 6.45 | 3.91 | 10.85 | 7.05 | 6.23  | 4.84 | 8.3   |
| 7.59  | 7.18  | 6.34 | 3.25 | 10.9  | 6.5  | 5.84  | 3.84 | 7.83  |
| 7.76  | 7.28  | 6.07 | 3.25 | 11.02 | 6.59 | 6.08  | 5.18 | 7.77  |
| 8.24  | 6.77  | 6.61 | 4.61 | 10.2  | 7.21 | 5.02  | 0.32 | 8.66  |
| 8.13  | 6.19  | 6.04 | 3.92 | 10.56 | 6.79 | 4.51  | 3.34 | 7.87  |
| 8.14  | 6.56  | 6.74 | 3.42 | 10.28 | 6.74 | 5     | 2.1  | 7.88  |
| 8.17  | 6.67  | 6.06 | 3.89 | 10.28 | 7    | 4.77  | 3.48 | 7.67  |
| 8.19  | 6.93  | 6.22 | 4.73 | 9.74  | 6.32 | 6.22  | 2.41 | 9.19  |
| 8.93  | 7.1   | 7.36 | 4.51 | 11.55 | 7.91 | 6.18  | 5.14 | 8.72  |
| 8.77  | 6.97  | 7.59 | 4.54 | 11.4  | 8.15 | 5.7   | 4.03 | 9.01  |
| 8.95  | 7.97  | 6.95 | 3.19 | 12.32 | 7.98 | 7.73  | 6    | 8.44  |
| 8.9   | 7.26  | 7.4  | 3.84 | 11.32 | 8.06 | 6.39  | 4.21 | 8.58  |
| 9.09  | 8.54  | 6.73 | 3.69 | 12.27 | 7.73 | 6.55  | 6.3  | 8.67  |
| 9.16  | 8.06  | 7.08 | 3.75 | 11.59 | 7.83 | 6.3   | 5.15 | 8.63  |
| 8.71  | 6.92  | 7.34 | 4.95 | 11.17 | 7.94 | 5.03  | 3.29 | 8.64  |
| 9.33  | 7.94  | 7.07 | 4.8  | 10.98 | 8.18 | 5.78  | 2.48 | 8.89  |
| 9.23  | 8.64  | 5.61 | 3.23 | 12.86 | 7.79 | 6.81  | 5.12 | 9.21  |
| 9.38  | 8.68  | 5.83 | 3.2  | 12.99 | 8.07 | 7     | 5.07 | 9.83  |
| 9.37  | 8.7   | 5.94 | 3.04 | 12.87 | 7.69 | 7.25  | 5.25 | 9.72  |

<https://mc.manuscriptcentral.com/gut>

|    |       |       |      |      |       |      |       |      |       |
|----|-------|-------|------|------|-------|------|-------|------|-------|
| 1  |       |       |      |      |       |      |       |      |       |
| 2  | 9.39  | 8.43  | 5.76 | 3.44 | 12.67 | 7.74 | 7.02  | 5.22 | 9.6   |
| 3  | 9.95  | 10.11 | 6.73 | 4.1  | 13.84 | 8.49 | 8.19  | 7.01 | 10.62 |
| 4  | 10.01 | 9.99  | 6.95 | 4.41 | 13.97 | 8.54 | 8.08  | 7.08 | 10.61 |
| 5  | 10.13 | 9.99  | 6.41 | 3.55 | 13.59 | 8.28 | 8.13  | 6.3  | 10.4  |
| 6  | 10.15 | 10.08 | 6.48 | 2.54 | 13.64 | 8.32 | 7.95  | 6.26 | 10.53 |
| 7  | 9.8   | 9.1   | 7.18 | 3.35 | 13.32 | 8.94 | 7.52  | 7.31 | 10.3  |
| 8  | 10.35 | 10.18 | 7.18 | 4.43 | 14.35 | 9.15 | 8.77  | 8.57 | 10.35 |
| 9  | 9.98  | 9.76  | 6.47 | 3.56 | 13.93 | 9.19 | 8.13  | 8.05 | 10.34 |
| 10 | 10.74 | 10.23 | 7.82 | 4.65 | 14.29 | 9.12 | 8.93  | 8.98 | 10.23 |
| 11 | 10.2  | 10.16 | 6.67 | 3.09 | 13.72 | 8.98 | 7.87  | 7.96 | 10.75 |
| 12 | 10.36 | 9.72  | 6.8  | 2.97 | 13.74 | 8.67 | 7.9   | 7.91 | 10.82 |
| 13 | 10.22 | 9.86  | 6.95 | 4.29 | 13.49 | 8.74 | 8.21  | 7.87 | 10.93 |
| 14 | 10.66 | 10    | 6.51 | 3.06 | 13.74 | 8.81 | 8.14  | 8.06 | 10.87 |
| 15 | 9.25  | 9.27  | 5.9  | 3.18 | 13.26 | 7.97 | 7.5   | 6.98 | 10.68 |
| 16 | 9.43  | 9.94  | 5.81 | 0    | 13.64 | 8.05 | 8.07  | 7.12 | 10.92 |
| 17 | 9.85  | 9.8   | 7.05 | 3.47 | 13.74 | 7.98 | 8.08  | 7.9  | 10.2  |
| 18 | 9.65  | 9.19  | 7.35 | 2.58 | 13.93 | 8.6  | 7.37  | 7.09 | 10.01 |
| 19 | 9.88  | 9.75  | 6.45 | 4.84 | 14.1  | 8.81 | 7.9   | 7.31 | 10.4  |
| 20 | 9.98  | 9.64  | 6.93 | 3.1  | 13.57 | 8.92 | 7.38  | 8.13 | 10.66 |
| 21 | 9.37  | 9.6   | 6.12 | 1.51 | 13.9  | 8.17 | 8.15  | 7.08 | 10.1  |
| 22 | 8.93  | 10.54 | 5.85 | 2.71 | 14.41 | 8.86 | 7.56  | 7.19 | 10.93 |
| 23 | 8.76  | 10.61 | 5.23 | 1.48 | 14.45 | 8.51 | 7.8   | 6.99 | 10.98 |
| 24 | 9.19  | 8.96  | 7.28 | 3.69 | 12.94 | 8.49 | 7.83  | 6.43 | 10.01 |
| 25 | 9.39  | 9.13  | 7.48 | 3.74 | 12.76 | 8.46 | 7.5   | 6.74 | 10.2  |
| 26 | 10.93 | 10.76 | 8.79 | 4.15 | 14.7  | 8.77 | 9.75  | 9.3  | 9.86  |
| 27 | 9.04  | 8.53  | 5.85 | 2.68 | 13.01 | 7.53 | 6.51  | 5.95 | 8.9   |
| 28 | 8.55  | 8.81  | 5.88 | 3.11 | 12.31 | 7.35 | 6.31  | 6.04 | 9.53  |
| 29 | 8.56  | 8.7   | 5.09 | 2.35 | 12.58 | 6.83 | 6.35  | 5.85 | 9.58  |
| 30 | 9.19  | 9.2   | 6.07 | 3.48 | 12.65 | 7.33 | 6.71  | 6.6  | 10.86 |
| 31 | 8.02  | 7.37  | 6.01 | 3.76 | 10.06 | 6.97 | 4.34  | 1.76 | 7.54  |
| 32 | 8.24  | 8.45  | 6.36 | 3.04 | 10.93 | 7.13 | 6     | 4.81 | 7.54  |
| 33 | 7.87  | 7.34  | 6.21 | 3.21 | 10.28 | 6.79 | 4.79  | 3.21 | 7.41  |
| 34 | 8.21  | 7.83  | 6.09 | 3.76 | 10.36 | 6.91 | 5.13  | 4.54 | 7.54  |
| 35 | 7.78  | 7.82  | 5.55 | 1.36 | 11.99 | 7.46 | 6.17  | 4.75 | 8.05  |
| 36 | 7.74  | 7.79  | 5.89 | 3.57 | 11.29 | 7.28 | 5.79  | 4.36 | 8.34  |
| 37 | 7.64  | 7.72  | 6.27 | 2.09 | 11.1  | 7.2  | 5.62  | 5.12 | 8.65  |
| 38 | 7.98  | 7.82  | 5.61 | 2.63 | 11.42 | 7.31 | 5.47  | 5.49 | 9.13  |
| 39 | 9.83  | 8.83  | 7.69 | 1.94 | 14.72 | 8.69 | 7.78  | 6.71 | 9.52  |
| 40 | 9.44  | 10.19 | 6.71 | 3.46 | 13.93 | 8.42 | 7.53  | 7.92 | 9.76  |
| 41 | 9.99  | 9.38  | 6.83 | 2.74 | 14.1  | 8.56 | 8.61  | 7.36 | 9.58  |
| 42 | 11.12 | 10.06 | 8.07 | 5.04 | 15.49 | 8.34 | 10.5  | 8.42 | 8.32  |
| 43 | 9.2   | 8.72  | 6.1  | 2.59 | 13.4  | 8.41 | 7     | 6.32 | 9.57  |
| 44 | 11.43 | 10.15 | 8.21 | 6.51 | 15.11 | 7.83 | 10.68 | 8.6  | 7.51  |
| 45 | 10.46 | 9.56  | 6.34 | 4.51 | 13.83 | 8.37 | 7.68  | 6.92 | 10.2  |
| 46 | 10.71 | 9.44  | 6.53 | 3.64 | 13.59 | 8.25 | 7.55  | 7.73 | 10.47 |
| 47 | 9.03  | 10.54 | 7.44 | 1.68 | 14.34 | 7.09 | 7.95  | 6.11 | 10.18 |
| 48 | 9.47  | 9.95  | 6.85 | 1.98 | 14.27 | 7.66 | 7.99  | 7.08 | 10.15 |
| 49 | 9.68  | 9.81  | 6.16 | 2.28 | 13.95 | 7.68 | 7.8   | 7.07 | 10.16 |
| 50 | 9.16  | 9.48  | 6.19 | 2.84 | 13.75 | 7.48 | 7.57  | 6.67 | 10.02 |
| 51 | 8.38  | 9.12  | 6.67 | 1.16 | 13.63 | 7.81 | 7.32  | 6.39 | 9.76  |
| 52 | 8.04  | 9.16  | 6.11 | 2.85 | 12.57 | 7.72 | 5.95  | 5.57 | 9.62  |
| 53 | 8.23  | 8.77  | 6.6  | 2.42 | 12.45 | 7.53 | 5.74  | 5.77 | 9.33  |

<https://mc.manuscriptcentral.com/gut>

|       |       |      |      |       |      |       |      |       |
|-------|-------|------|------|-------|------|-------|------|-------|
| 9.17  | 9.62  | 6.7  | 3.11 | 13.28 | 7.9  | 7.23  | 7.25 | 9.91  |
| 8.7   | 8.69  | 6.27 | 1.1  | 13.7  | 7.21 | 7.17  | 7.56 | 9.75  |
| 7.96  | 8.7   | 5.44 | 3.17 | 13.06 | 7.69 | 6.67  | 7.41 | 9.92  |
| 8.01  | 8.61  | 4.81 | 2.49 | 13.02 | 7.57 | 6.72  | 7.31 | 9.9   |
| 8.24  | 7.62  | 7.34 | 3.14 | 12.11 | 6.84 | 6.98  | 6.31 | 8.41  |
| 8.68  | 9.74  | 5.79 | 2.15 | 13.36 | 8.44 | 6.82  | 6.25 | 10.31 |
| 9.03  | 10.08 | 5.11 | 2.24 | 13.84 | 8.44 | 7.37  | 5.68 | 9.88  |
| 9.08  | 10.12 | 5.16 | 2.52 | 13.91 | 8.38 | 7.31  | 5.4  | 9.85  |
| 8.03  | 6.27  | 6.87 | 3.97 | 10.61 | 7.09 | 4.86  | 2.27 | 8.75  |
| 8.61  | 8.01  | 6.72 | 4.01 | 12.06 | 7.52 | 6.13  | 5.58 | 8.91  |
| 9.32  | 8.98  | 7.35 | 0.65 | 13.65 | 8.48 | 7.03  | 7.3  | 10.01 |
| 8.69  | 8.89  | 7.04 | 2.47 | 12.91 | 7.99 | 6.7   | 7.14 | 10.23 |
| 9.12  | 9.32  | 7.37 | 3.47 | 13.25 | 8.26 | 7.38  | 7.65 | 10.06 |
| 8.97  | 8.95  | 7.65 | 3.13 | 13.03 | 7.95 | 6.26  | 7.27 | 10.16 |
| 11.97 | 9.14  | 6.63 | 2.54 | 14.82 | 8    | 11.69 | 8.22 | 6.71  |
| 9.18  | 8.86  | 6.1  | 2.8  | 12.96 | 7.65 | 7.07  | 6.86 | 9.33  |
| 8.57  | 8.3   | 6.03 | 1.56 | 12.27 | 7.49 | 6.57  | 5.95 | 9.19  |
| 9.32  | 8.97  | 6.28 | 2.75 | 13.14 | 7.74 | 7.55  | 7.24 | 9.31  |



1  
2  
3  
4  
5  
6  
7  
8  
9  
10  
11  
12  
13  
14  
15  
16  
17  
18  
19  
20  
21  
22  
23  
24  
25  
26  
27  
28  
29  
30  
31  
32  
33  
34  
35  
36  
37  
38  
39  
40  
41  
42  
43  
44  
45  
46  
47  
48  
49  
50  
51  
52  
53  
54  
55  
56  
57  
58  
59  
60

| RUNX1 | RUNX1T1 | S100A14 | S100A7 | S1PR1 | SACS | SAMSN1 | SCG2 | SCNN1A |
|-------|---------|---------|--------|-------|------|--------|------|--------|
| 7.07  | 7.35    | 6.37    | 7.5    | 7.36  | 6.28 | 7.42   | 4.65 | 6.32   |
| 8.16  | 6.81    | 9.01    | 12.63  | 6.94  | 5.77 | 7.21   | 4.01 | 9.21   |
| 7.7   | 7.07    | 10      | 12.91  | 7.21  | 5.97 | 7.12   | 4.73 | 8.94   |
| 9.26  | 6.64    | 9.67    | 5.09   | 7.6   | 5.73 | 7.38   | 3.76 | 9.25   |
| 3.82  | 9.04    | 7.56    | 9.17   | 7.96  | 7.1  | 7.61   | 6.05 | 7.87   |
| 7.73  | 7.08    | 7.35    | 7.46   | 6.48  | 6.76 | 7.05   | 4.74 | 7.9    |
| 7.68  | 7.1     | 7.19    | 7.64   | 6.73  | 6.65 | 7.8    | 4.38 | 8.24   |
| 9.37  | 5.75    | 8.05    | 4.3    | 6.62  | 7.1  | 7.59   | 1.39 | 8.07   |
| 9.02  | 6.32    | 4.17    | 0.37   | 5.92  | 5.72 | 7.62   | 4.17 | 8.18   |
| 8     | 6.61    | 6.65    | 6.66   | 6.3   | 5.66 | 6.38   | 3.91 | 8.69   |
| 8.37  | 5.59    | 6.11    | 1.96   | 5.47  | 5.02 | 6.96   | 2.7  | 9.03   |
| 8.89  | 6.61    | 6.38    | 1.68   | 6.21  | 6.24 | 7.07   | 2.68 | 8.53   |
| 6.99  | 7.32    | 6.04    | 6.88   | 6.62  | 5.95 | 6.72   | 4.31 | 8.35   |
| 8     | 7.37    | 6.52    | 7.27   | 6.8   | 6.39 | 7.22   | 4.43 | 7.46   |
| 10.53 | 6.67    | 6.72    | 1.77   | 8.05  | 6.67 | 7.6    | 3.35 | 8.18   |
| 8.66  | 7.57    | 7.79    | 12.1   | 7.78  | 6.85 | 7.86   | 4.53 | 7.81   |
| 8.47  | 7.7     | 9.06    | 9.36   | 7.31  | 6.15 | 6.93   | 4.87 | 8.9    |
| 8.73  | 8.18    | 8.15    | 9.88   | 7.72  | 6.29 | 6.99   | 4.76 | 8.08   |
| 9.74  | 6.22    | 3.6     | 0      | 8.15  | 6.09 | 8.18   | 2.7  | 3.48   |
| 9.28  | 5.83    | 5.29    | 1.31   | 6.55  | 5.54 | 7.98   | 3.01 | 7.04   |
| 9.16  | 6.87    | 2.67    | 2.96   | 7.52  | 6.38 | 8.44   | 3.31 | 3.59   |
| 9.03  | 7.63    | 9.02    | 4.32   | 6.82  | 7.06 | 6.66   | 5.64 | 9.32   |
| 8.9   | 6.47    | 8.77    | 5.06   | 6.41  | 7.04 | 6.77   | 5.33 | 9.18   |
| 9.27  | 7.41    | 8.36    | 3.7    | 6.52  | 7.18 | 6.93   | 4.65 | 9.26   |
| 7.5   | 4.75    | 8.65    | 2.75   | 5.13  | 5.71 | 7.43   | 1.43 | 5.47   |
| 8.43  | 4.13    | 6.34    | 9.96   | 5.59  | 5.91 | 6.74   | 2.45 | 6.94   |
| 8.25  | 4.69    | 6.81    | 8.65   | 5.81  | 6.28 | 6.63   | 4.11 | 7.35   |
| 7.94  | 6.7     | 6.87    | 9.25   | 7.24  | 5.87 | 7.07   | 3.92 | 8.23   |
| 7.23  | 6.65    | 5.85    | 6.94   | 7.04  | 5.48 | 6.67   | 3.78 | 8.17   |
| 7.86  | 7.03    | 7.73    | 7.29   | 7.3   | 6.11 | 6.97   | 4.53 | 8.4    |
| 8.25  | 6.99    | 7.22    | 6.96   | 6.98  | 5.44 | 6.69   | 3.37 | 9.28   |
| 8.3   | 7.46    | 6.82    | 7.63   | 7.39  | 6.41 | 6.99   | 5.17 | 8.57   |
| 6.96  | 7.46    | 5.87    | 7.29   | 7.84  | 6.42 | 8.64   | 4.63 | 6.61   |
| 9.65  | 7.92    | 6.57    | 3.06   | 6.19  | 6.23 | 7.33   | 3.64 | 8.29   |
| 9.16  | 6.46    | 8.11    | 2.42   | 6.05  | 5.52 | 7.2    | 3.2  | 8.6    |
| 9.65  | 7.66    | 6.96    | 2.47   | 6.45  | 6.03 | 6.85   | 3.47 | 8.02   |
| 8.48  | 4.97    | 8.98    | 2.45   | 6.95  | 5.9  | 8.3    | 2.03 | 2.45   |
| 8.64  | 4.86    | 9.99    | 3.99   | 5.31  | 5.61 | 8.68   | 3.1  | 5.05   |
| 8.94  | 6.32    | 9.15    | 3.69   | 6.3   | 5.83 | 7.98   | 2.37 | 3.54   |
| 8.54  | 5.58    | 8.53    | 3.83   | 5.81  | 5.93 | 7.98   | 1.33 | 3.33   |
| 7.39  | 7.13    | 6.23    | 6.99   | 7.08  | 5.58 | 6.65   | 4.64 | 7.85   |
| 7.34  | 6.98    | 6.96    | 7.52   | 6.72  | 5.7  | 6.34   | 4.7  | 8.68   |
| 6.93  | 6.89    | 5.97    | 7.27   | 6.77  | 5.92 | 6.22   | 4.74 | 7.79   |
| 7.34  | 6.69    | 5.54    | 6.6    | 6.29  | 4.86 | 5.72   | 3.98 | 8.89   |
| 9.34  | 5.67    | 6.95    | 4.45   | 6.95  | 5.67 | 5.86   | 2.86 | 3.86   |
| 7.84  | 6.25    | 5.44    | 3.12   | 5.93  | 5.71 | 6.54   | 3.77 | 8.27   |
| 8.09  | 6.47    | 5.17    | 1.58   | 6.06  | 5.67 | 6.69   | 3    | 6.47   |
| 8.46  | 7.65    | 4.71    | 0      | 5.85  | 6.47 | 6.54   | 2.81 | 6.39   |
| 9.35  | 6.78    | 8.77    | 2.63   | 6.25  | 6.82 | 7.72   | 3.44 | 4.22   |
| 9.24  | 6.22    | 9.02    | 3.33   | 5.62  | 6.24 | 7.65   | 2.59 | 4.82   |
| 8.79  | 5.62    | 8.63    | 3.08   | 5.3   | 6.54 | 7.63   | 3.3  | 6.87   |

<https://mc.manuscriptcentral.com/gut>

|    |      |       |       |       |       |      |      |      |      |
|----|------|-------|-------|-------|-------|------|------|------|------|
| 1  |      |       |       |       |       |      |      |      |      |
| 2  | 9.39 | 6.91  | 8.23  | 2.66  | 6.12  | 6.74 | 7.88 | 3.66 | 4.78 |
| 3  | 8.04 | 7.19  | 8.42  | 6.8   | 6.62  | 5.94 | 6.44 | 4.03 | 6.77 |
| 4  | 8.99 | 7.31  | 7.99  | 7.27  | 7.34  | 6.3  | 6.89 | 4.71 | 6.68 |
| 5  | 9.1  | 6.97  | 8.43  | 7     | 6.52  | 6.18 | 6.87 | 4.81 | 7.94 |
| 6  | 8.79 | 7.12  | 7.99  | 7.32  | 7.04  | 6.14 | 7.19 | 4.05 | 6.8  |
| 7  | 8.4  | 5.96  | 5.36  | 4.98  | 7.2   | 6.32 | 7.65 | 2.55 | 7.62 |
| 8  | 8.64 | 5.89  | 6.86  | 3.57  | 6.29  | 4.77 | 6.98 | 2.25 | 9.11 |
| 9  | 8.13 | 4.81  | 5.41  | 1.59  | 5.69  | 4.53 | 5.36 | 2.17 | 8.18 |
| 10 | 8.79 | 6.72  | 4.69  | 1.44  | 6.08  | 5.39 | 6.74 | 3.25 | 8.9  |
| 11 | 7.14 | 4.71  | 7.44  | 1.9   | 4.87  | 5.17 | 7.35 | 4.28 | 9.94 |
| 12 | 7.98 | 5.35  | 8.77  | 1.54  | 5.59  | 4.93 | 7.62 | 2.54 | 10   |
| 13 | 7.41 | 5.46  | 8.7   | 2.99  | 5.6   | 5.1  | 7.13 | 4.27 | 9.57 |
| 14 | 7.61 | 5.53  | 8.55  | 0.98  | 5.23  | 5.53 | 7.28 | 4.07 | 9.24 |
| 15 | 8.74 | 10.88 | 11.56 | 5.15  | 10.36 | 6.15 | 9.67 | 7.15 | 10.2 |
| 16 | 9.81 | 9.09  | 9.11  | 7.53  | 8.21  | 5.6  | 7.2  | 6.07 | 9.26 |
| 17 | 9.15 | 8.23  | 8.24  | 8.18  | 7.62  | 5.96 | 7.76 | 5.6  | 8.17 |
| 18 | 3.41 | 10.75 | 9.65  | 9.65  | 9.39  | 7.38 | 8.29 | 7.6  | 10.1 |
| 19 | 5.3  | 10.24 | 9.1   | 9.23  | 9.4   | 7.18 | 7.58 | 6.66 | 9.52 |
| 20 | 8.24 | 6.37  | 7.66  | 6.55  | 6.14  | 5.66 | 6.62 | 4.31 | 5.69 |
| 21 | 8.07 | 6.56  | 8.39  | 6.75  | 6.48  | 5.21 | 6.38 | 4.26 | 6.11 |
| 22 | 8.56 | 6.83  | 7.5   | 7.01  | 7.03  | 5.69 | 6.97 | 4.8  | 6.13 |
| 23 | 8.73 | 6.72  | 9.68  | 11.01 | 6.44  | 5    | 7.32 | 3.1  | 8.88 |
| 24 | 8.26 | 7.21  | 9.02  | 10.96 | 6.7   | 5.67 | 6.7  | 4.6  | 8.45 |
| 25 | 7.96 | 8.07  | 7.56  | 8.06  | 7.65  | 6.3  | 6.54 | 5.44 | 7.35 |
| 26 | 8.91 | 5.99  | 8.44  | 4.96  | 6.7   | 6.83 | 7.83 | 2.96 | 9.8  |
| 27 | 9.3  | 5.8   | 8.36  | 4.74  | 6.31  | 6.75 | 7.63 | 2.85 | 9.74 |
| 28 | 9.24 | 5.78  | 8.28  | 2.69  | 6.67  | 7.03 | 7.57 | 3.69 | 8.68 |
| 29 | 8.02 | 7.02  | 7.44  | 7.24  | 6.94  | 7.37 | 7.49 | 4.36 | 7.17 |
| 30 | 8.29 | 7.13  | 7.01  | 7.53  | 6.69  | 7.25 | 7.63 | 2.98 | 7.02 |
| 31 | 8.09 | 7.45  | 7.12  | 7.62  | 7.13  | 7.04 | 7.59 | 4.61 | 6.61 |
| 32 | 8.86 | 7.69  | 9.53  | 7.88  | 7.32  | 7.28 | 7.4  | 5.61 | 9.12 |
| 33 | 8.49 | 7.53  | 10.15 | 7.6   | 6.93  | 7.63 | 6.48 | 4.84 | 8.62 |
| 34 | 8.4  | 7.89  | 9.83  | 8.14  | 7.07  | 7.48 | 6.84 | 5.38 | 8.92 |
| 35 | 8.57 | 7.73  | 7.97  | 7.42  | 6.83  | 6.62 | 7.09 | 4.82 | 9.69 |
| 36 | 8.12 | 7.53  | 8.88  | 7.45  | 6.9   | 6.58 | 7.43 | 4.88 | 9.53 |
| 37 | 8.87 | 7.71  | 8.07  | 7.51  | 7.07  | 6.51 | 7.44 | 5.45 | 9.55 |
| 38 | 8.44 | 7.81  | 7.39  | 8.55  | 7.78  | 6.85 | 7.79 | 4.83 | 7.01 |
| 39 | 8.44 | 7.81  | 7.39  | 8.55  | 7.78  | 6.85 | 7.79 | 4.83 | 7.01 |
| 40 | 8.67 | 8.07  | 8.15  | 8.33  | 7.31  | 7.01 | 6.99 | 5.58 | 8.09 |
| 41 | 8.54 | 8     | 7.97  | 8.04  | 7.38  | 7.11 | 6.85 | 5.64 | 8.04 |
| 42 | 9.44 | 8.41  | 7.49  | 8     | 7.23  | 6.91 | 7.04 | 5.54 | 8.05 |
| 43 | 6.08 | 8.02  | 7.09  | 8.56  | 7.82  | 6.86 | 8.05 | 5.46 | 7.23 |
| 44 | 8.03 | 7.65  | 6.98  | 7.83  | 7.22  | 6.47 | 8.2  | 4.82 | 6.93 |
| 45 | 8.24 | 7.04  | 8.5   | 7.62  | 6.95  | 6.1  | 7.31 | 4.65 | 7.79 |
| 46 | 7.62 | 8.02  | 7.76  | 8.28  | 7.39  | 6.66 | 7.51 | 5.52 | 7.87 |
| 47 | 8.96 | 7.15  | 9.29  | 2.31  | 5.66  | 5.59 | 6.56 | 0    | 8.59 |
| 48 | 8.36 | 5.5   | 9.99  | 0.08  | 5.5   | 5.03 | 5.08 | 2.66 | 9.37 |
| 49 | 9.31 | 6.84  | 9.29  | 3.1   | 6.54  | 5.52 | 7.36 | 3.1  | 8.65 |
| 50 | 7.27 | 7.57  | 6.6   | 8.17  | 7.81  | 6.51 | 7.61 | 4.91 | 7.39 |
| 51 | 8.93 | 8.28  | 6.14  | 8     | 7.7   | 6.41 | 6.97 | 5.44 | 7.89 |
| 52 | 8.73 | 8.51  | 6.34  | 8.07  | 7.06  | 6.69 | 7.01 | 5.74 | 8.13 |
| 53 | 7.89 | 7.48  | 7.01  | 8.17  | 7.41  | 5.98 | 7.37 | 5.04 | 7.63 |
| 54 |      |       |       |       |       |      |      |      |      |
| 55 |      |       |       |       |       |      |      |      |      |
| 56 |      |       |       |       |       |      |      |      |      |
| 57 |      |       |       |       |       |      |      |      |      |
| 58 |      |       |       |       |       |      |      |      |      |
| 59 |      |       |       |       |       |      |      |      |      |
| 60 |      |       |       |       |       |      |      |      |      |

<https://mc.manuscriptcentral.com/gut>

1  
2  
3  
4  
5  
6  
7  
8  
9  
10  
11  
12  
13  
14  
15  
16  
17  
18  
19  
20  
21  
22  
23  
24  
25  
26  
27  
28  
29  
30  
31  
32  
33  
34  
35  
36  
37  
38  
39  
40  
41  
42  
43  
44  
45  
46  
47  
48  
49  
50  
51  
52  
53  
54  
55  
56  
57  
58  
59  
60

|       |       |       |       |      |      |      |      |       |
|-------|-------|-------|-------|------|------|------|------|-------|
| 8.29  | 7.2   | 6.81  | 7.9   | 6.67 | 6.19 | 7.31 | 5.17 | 8.38  |
| 8.43  | 8.47  | 7.36  | 9.05  | 7.71 | 6.83 | 7.06 | 5.64 | 8.1   |
| 7.98  | 7.56  | 5.83  | 6.41  | 7.47 | 5.97 | 7.95 | 3.95 | 7.43  |
| 9.35  | 7.77  | 10.91 | 10.01 | 6.75 | 6.32 | 7.91 | 4.16 | 9.96  |
| 9.73  | 8.26  | 8.06  | 4.88  | 6.97 | 6.22 | 7.42 | 3.08 | 9.68  |
| 9.21  | 6.41  | 9.01  | 5.11  | 6.99 | 5.9  | 8.13 | 4.41 | 6.08  |
| 7.91  | 5.87  | 8.17  | 2.13  | 5.13 | 5.81 | 6.6  | 1.13 | 7.62  |
| 8.25  | 6.13  | 8.11  | 3.22  | 5.54 | 5.8  | 6.69 | 1.76 | 7.83  |
| 10.04 | 6.2   | 8.3   | 2.49  | 8.45 | 6.58 | 7.58 | 4.08 | 7.82  |
| 8.81  | 6.15  | 4.88  | 0.79  | 7.18 | 5.79 | 7.45 | 3.79 | 6.75  |
| 8.37  | 5.49  | 5.19  | 0.49  | 4.74 | 6.32 | 6.42 | 3.49 | 10.27 |
| 7.17  | 6.75  | 6.56  | 7.54  | 6.23 | 5.67 | 6.58 | 4.65 | 9.28  |
| 10.46 | 7.02  | 5.26  | 2.26  | 7.55 | 6.07 | 6.58 | 3.26 | 9.32  |
| 1.52  | 9.69  | 8.48  | 9.78  | 8.72 | 8.42 | 7.93 | 7.01 | 8.98  |
| 9.09  | 5.88  | 9.12  | 5.27  | 5.23 | 6.27 | 4.8  | 3.53 | 9.68  |
| 9.14  | 4.42  | 9.35  | 0     | 5.45 | 6.12 | 5    | 1.83 | 9.96  |
| 8.89  | 6.15  | 9.16  | 4.1   | 5.4  | 6.01 | 5.69 | 2.52 | 10.03 |
| 8.76  | 5.48  | 5.93  | 2.6   | 5.14 | 5.88 | 7.93 | 3.02 | 7.03  |
| 8.68  | 7.36  | 5.48  | 7.14  | 6.31 | 5.73 | 7.4  | 4.55 | 6.6   |
| 8.99  | 6.93  | 4.92  | 6.43  | 6.08 | 5.55 | 7.74 | 3.85 | 5.95  |
| 9.33  | 8.62  | 8.75  | 7.75  | 8.86 | 5.16 | 7.97 | 6.75 | 7.16  |
| 7.65  | 4.91  | 7.7   | 8.14  | 5.26 | 4.83 | 6.85 | 1.46 | 8.19  |
| 8.14  | 5.71  | 7.54  | 6.98  | 6.18 | 5.06 | 7.85 | 2.54 | 7.88  |
| 8.7   | 6.64  | 7.22  | 4.77  | 6.09 | 4.5  | 5.43 | 2.77 | 5.7   |
| 9.15  | 6.52  | 7.28  | 1.91  | 7.33 | 5.43 | 5.99 | 3.91 | 6.23  |
| 9.78  | 7.87  | 5.45  | 4.24  | 6.52 | 5.63 | 6.83 | 5.07 | 2.54  |
| 4.32  | 8.33  | 7.54  | 9.01  | 8.21 | 7.26 | 7.37 | 6.08 | 7.89  |
| 0.86  | 8.44  | 7.47  | 9.01  | 8.47 | 7.03 | 7.47 | 6.14 | 7.78  |
| 3.35  | 8.31  | 7.5   | 8.67  | 7.57 | 7.16 | 7.23 | 5.94 | 7.94  |
| 7.73  | 6.71  | 6.08  | 1.59  | 5.26 | 4.76 | 6.47 | 3.01 | 7.77  |
| 8.54  | 7.62  | 5.47  | 1.59  | 5.52 | 5.52 | 6.08 | 2.76 | 7.31  |
| 8.21  | 6.66  | 7.09  | 4.11  | 5.97 | 4.75 | 5.72 | 3.28 | 8.27  |
| 8.84  | 7.89  | 5.11  | 0.16  | 6.33 | 5.11 | 6.42 | 4.96 | 7.2   |
| 4.04  | 7.64  | 6.54  | 8.07  | 7.52 | 6.04 | 6.01 | 5.54 | 7.54  |
| 4.9   | 7.46  | 6.27  | 7.95  | 6.78 | 6.34 | 6.18 | 5.21 | 6.46  |
| 5.23  | 7.35  | 6.25  | 7.42  | 6.52 | 5.94 | 6.53 | 4.9  | 6.37  |
| 0.32  | 8.95  | 7.32  | 8.52  | 7.74 | 6.37 | 6.62 | 6.3  | 8.51  |
| 2.34  | 7.78  | 6.19  | 8.3   | 7.48 | 6.38 | 6.83 | 5.58 | 6.73  |
| 4.1   | 7.68  | 6.59  | 8.12  | 7    | 6.18 | 6.49 | 5.27 | 6.9   |
| 3.77  | 7.61  | 6.52  | 8.23  | 7.19 | 6.24 | 6.58 | 5.26 | 6.86  |
| 3.41  | 10.13 | 9.97  | 7.27  | 8.46 | 5    | 6.5  | 6.32 | 10.38 |
| 4.23  | 8.43  | 7.59  | 8.97  | 8.36 | 6.73 | 7.43 | 5.76 | 7.78  |
| 0.33  | 8.75  | 7.86  | 9.04  | 8.59 | 7.32 | 7.91 | 6.36 | 8.22  |
| 7.61  | 7.47  | 6.39  | 8.01  | 7.81 | 6.19 | 7.47 | 4.45 | 6.95  |
| 4.92  | 8.43  | 7.48  | 8.8   | 7.98 | 7    | 7.37 | 6.24 | 7.79  |
| 6.56  | 7.88  | 6.93  | 8.62  | 7.45 | 6.55 | 7.22 | 5.55 | 8.09  |
| 4.62  | 8.52  | 7.86  | 9.41  | 7.63 | 7.33 | 7.4  | 6.42 | 7.74  |
| 1.71  | 8.48  | 7.64  | 9.73  | 7.6  | 7.34 | 7.68 | 6.17 | 8.1   |
| 4.36  | 9.16  | 8.14  | 9.71  | 7.79 | 7.15 | 7.43 | 6.45 | 8.96  |
| 6.5   | 8.23  | 6.56  | 7.54  | 5.82 | 5.69 | 6.58 | 4.96 | 9.16  |
| 7.19  | 7.61  | 7.7   | 7.94  | 5.72 | 6.31 | 6.94 | 4.7  | 9.34  |
| 7.06  | 7.87  | 7.67  | 7.91  | 6.28 | 6.04 | 7.05 | 5.25 | 9.27  |

<https://mc.manuscriptcentral.com/gut>

1  
2  
3  
4  
5  
6  
7  
8  
9  
10  
11  
12  
13  
14  
15  
16  
17  
18  
19  
20  
21  
22  
23  
24  
25  
26  
27  
28  
29  
30  
31  
32  
33  
34  
35  
36  
37  
38  
39  
40  
41  
42  
43  
44  
45  
46  
47  
48  
49  
50  
51  
52  
53  
54  
55  
56  
57  
58  
59  
60

|      |      |       |      |      |      |      |      |       |
|------|------|-------|------|------|------|------|------|-------|
| 7.13 | 7.99 | 7.88  | 8.02 | 6.42 | 6.05 | 7.02 | 5.18 | 9.08  |
| 8.78 | 7.17 | 9.31  | 7.16 | 7.09 | 6.22 | 7.76 | 4.1  | 10.75 |
| 8.96 | 7.15 | 9.59  | 7.04 | 7.33 | 6.94 | 7.41 | 4.56 | 10.79 |
| 7.85 | 6.57 | 9.44  | 7.15 | 6.95 | 5.99 | 6.6  | 4.44 | 10.67 |
| 8.15 | 7.01 | 9.54  | 7.63 | 7.19 | 6.15 | 6.46 | 4.62 | 10.64 |
| 9.11 | 8.2  | 8.4   | 7.81 | 7.83 | 6.56 | 7.94 | 5.32 | 7.41  |
| 9.97 | 7.15 | 9.46  | 5.43 | 7.27 | 5.75 | 7.78 | 0.84 | 7.15  |
| 9.39 | 6.61 | 10.04 | 6.76 | 6.79 | 6.42 | 7.72 | 3.15 | 7.38  |
| 9.8  | 8.15 | 6.87  | 4.55 | 8.23 | 6.93 | 8.12 | 3.06 | 6.57  |
| 9.55 | 7.26 | 7.92  | 5.09 | 7.01 | 5.62 | 7.26 | 4.93 | 4.76  |
| 9.05 | 7.51 | 7.2   | 5.69 | 6.93 | 5.41 | 7.48 | 4.17 | 6.21  |
| 9.36 | 7.4  | 7.29  | 5.14 | 6.72 | 5.59 | 8.05 | 4.19 | 5.78  |
| 9.2  | 7.41 | 7.14  | 5.19 | 6.74 | 5.68 | 6.71 | 4.23 | 5.42  |
| 7.69 | 7.04 | 7.53  | 7.6  | 6.59 | 5.99 | 7.18 | 4.61 | 6.8   |
| 8.6  | 5.76 | 7.98  | 7.26 | 5.81 | 5.32 | 7.34 | 2.09 | 8.24  |
| 8.94 | 7.69 | 7.26  | 7.05 | 7.55 | 6.41 | 7.36 | 4.6  | 7.02  |
| 8.57 | 7.53 | 3     | 1    | 7.39 | 5.7  | 7.74 | 4.32 | 4.39  |
| 8.61 | 6.9  | 6.28  | 2.25 | 5.31 | 4.37 | 6.78 | 1.67 | 7.84  |
| 9.36 | 7.96 | 5.27  | 1.52 | 6.63 | 6.43 | 7.27 | 3.1  | 6.69  |
| 8.24 | 6.12 | 8.5   | 0    | 5.95 | 4.88 | 7.1  | 5.29 | 8.07  |
| 9.03 | 5.95 | 7.51  | 3.35 | 5.3  | 5.54 | 6.79 | 2.13 | 5.75  |
| 9.59 | 5.21 | 7.54  | 4.39 | 4.73 | 4.48 | 5.31 | 1.06 | 6.27  |
| 8.64 | 6.46 | 8.17  | 6.46 | 7.17 | 6.01 | 7.58 | 3.91 | 9.26  |
| 8.99 | 6.86 | 8.24  | 6.39 | 6.71 | 5.45 | 7.59 | 2.51 | 9.72  |
| 10.4 | 7.91 | 9.01  | 4.74 | 8.82 | 6.85 | 7.24 | 4.15 | 9.17  |
| 6.87 | 5.01 | 5.12  | 0.36 | 5.32 | 5.49 | 6.84 | 0.36 | 3.53  |
| 7.11 | 6.31 | 6     | 5.04 | 5.74 | 5.84 | 7.38 | 3.79 | 6.84  |
| 6.82 | 5.89 | 6.19  | 3.46 | 4.76 | 4.81 | 6.48 | 3.09 | 5.67  |
| 6.99 | 6.15 | 5.81  | 1.9  | 6.15 | 5.22 | 6.76 | 1.9  | 4.22  |
| 1.76 | 7.78 | 6.46  | 8.27 | 7.4  | 6.34 | 6.22 | 4.57 | 6.4   |
| 5.85 | 7.16 | 7.02  | 8.06 | 6.91 | 6.39 | 6.45 | 5.11 | 7.16  |
| 0.88 | 7.5  | 6.59  | 8.21 | 7.21 | 6.28 | 6.97 | 5.64 | 7.05  |
| 2.54 | 7.51 | 6.31  | 8.12 | 7    | 6.13 | 5.81 | 5.2  | 7.26  |
| 6.58 | 5.97 | 6.06  | 6.07 | 6.02 | 5.59 | 6.23 | 2.94 | 6.25  |
| 6.4  | 6.42 | 6.71  | 7.11 | 6.52 | 5.57 | 6.15 | 3.98 | 7.01  |
| 6.77 | 6.99 | 6.09  | 7.11 | 6.54 | 5.81 | 6.31 | 4.52 | 7.24  |
| 7.7  | 6.85 | 5.75  | 6.49 | 6.28 | 6.03 | 6.52 | 4.52 | 6.62  |
| 7.52 | 5.16 | 3.16  | 1.94 | 7.7  | 6.76 | 8.72 | 2.35 | 1.35  |
| 7.78 | 6.75 | 8.9   | 5.05 | 6.63 | 6.16 | 6.11 | 4.05 | 8.39  |
| 9    | 5.17 | 5     | 0.42 | 6.51 | 4.59 | 7.61 | 2.74 | 7.64  |
| 9.85 | 5.69 | 3.82  | 2.23 | 8.21 | 5.23 | 7.79 | 3.82 | 6.4   |
| 8.79 | 6.86 | 7.62  | 7.28 | 6.76 | 5.08 | 6.57 | 3.29 | 5.59  |
| 9.68 | 6.83 | 4.51  | 5.51 | 8.6  | 4.51 | 8.51 | 4.51 | 6.51  |
| 9.11 | 6.28 | 7.67  | 0    | 6.31 | 5.6  | 7    | 0    | 8.11  |
| 9.38 | 6.84 | 6.53  | 1.94 | 5.55 | 5.69 | 6.52 | 2.94 | 8.39  |
| 6.99 | 3    | 9.33  | 3    | 3.49 | 7.02 | 3.68 | 1.68 | 5.14  |
| 8.27 | 6.93 | 9     | 5.34 | 6.43 | 6.82 | 6.49 | 2.79 | 6.57  |
| 8.1  | 5.8  | 8.96  | 2.86 | 5.56 | 6.98 | 6.3  | 2.28 | 6.43  |
| 7.57 | 6.93 | 8.35  | 6.16 | 6.45 | 6.68 | 6.93 | 4.16 | 6.87  |
| 8.27 | 5.41 | 7.56  | 1.16 | 6    | 4.86 | 7.39 | 3.74 | 7.4   |
| 7.76 | 6.79 | 6.36  | 5.74 | 6.39 | 5.53 | 6.51 | 3.7  | 7.88  |
| 8.06 | 6.45 | 6.24  | 5.62 | 6.1  | 5.23 | 6.73 | 4.59 | 7.49  |

<https://mc.manuscriptcentral.com/gut>

1  
2  
3  
4  
5  
6  
7  
8  
9  
10  
11  
12  
13  
14  
15  
16  
17  
18  
19  
20  
21  
22  
23  
24  
25  
26  
27  
28  
29  
30  
31  
32  
33  
34  
35  
36  
37  
38  
39  
40  
41  
42  
43  
44  
45  
46  
47  
48  
49  
50  
51  
52  
53  
54  
55  
56  
57  
58  
59  
60

|      |      |      |      |      |      |      |      |      |
|------|------|------|------|------|------|------|------|------|
| 8.83 | 6.88 | 5.88 | 0.79 | 6.37 | 5.6  | 6.6  | 2.37 | 7.89 |
| 7.53 | 7.01 | 7.17 | 5.27 | 6.14 | 5.01 | 5.19 | 3.68 | 6.23 |
| 7.33 | 5.72 | 8.69 | 5.34 | 5.91 | 5.63 | 4.83 | 2.91 | 6.65 |
| 7.15 | 6.04 | 8.9  | 5.35 | 5.49 | 5.95 | 3.95 | 3.29 | 5.7  |
| 7.23 | 7.6  | 7.44 | 7.66 | 7.68 | 6.55 | 5.36 | 4.36 | 6.8  |
| 7.44 | 4.92 | 8.24 | 0.57 | 5.42 | 5.5  | 7.67 | 2.89 | 5.02 |
| 6.7  | 4.62 | 6.79 | 1.65 | 4.35 | 5.54 | 6.84 | 2.24 | 5.74 |
| 6.7  | 3.88 | 6.83 | 0.94 | 4.21 | 5.69 | 6.65 | 0    | 6.11 |
| 1.86 | 7.75 | 7.13 | 8.34 | 7.42 | 6.75 | 6.63 | 5.92 | 7.09 |
| 7.48 | 7.43 | 6.52 | 8.1  | 7.07 | 6.36 | 7.1  | 4.87 | 7.78 |
| 7.95 | 7.35 | 7.1  | 1.65 | 6.82 | 5.38 | 7.18 | 2.65 | 5.63 |
| 8.13 | 7.17 | 6.98 | 5.35 | 6.47 | 5.64 | 6.72 | 4.21 | 7.44 |
| 8.32 | 7.47 | 6.47 | 2.3  | 6.93 | 5.51 | 6.75 | 3.3  | 7.93 |
| 8.6  | 7.94 | 6.13 | 4.83 | 6.96 | 6.08 | 6.85 | 5.48 | 6.32 |
| 9.23 | 7.13 | 9    | 2.54 | 7.87 | 4.13 | 6.79 | 3.54 | 7.79 |
| 8.48 | 6.39 | 7.76 | 5.12 | 5.63 | 4.93 | 6.98 | 3.61 | 7.86 |
| 8.06 | 6.75 | 6.47 | 8.06 | 6.47 | 5.59 | 6.78 | 4.19 | 7.8  |
| 8.72 | 6.47 | 7.7  | 4.61 | 5.64 | 5.21 | 6.89 | 3.21 | 7.76 |

|    | SDC4  | SELE | SEMA3E | SERINC5 | SERPINA1 | SERPINE1 | SERPINF1 | SERPING1 | SERPINH1 |
|----|-------|------|--------|---------|----------|----------|----------|----------|----------|
| 1  |       |      |        |         |          |          |          |          |          |
| 2  |       |      |        |         |          |          |          |          |          |
| 3  | 10.84 | 5.63 | 6.65   | 8.17    | 10.56    | 8.11     | 9.27     | 9.24     | 9.58     |
| 4  | 10.6  | 5.84 | 5.69   | 8.55    | 9.46     | 8.42     | 8.24     | 9.21     | 10.29    |
| 5  | 10.44 | 6.13 | 5.97   | 8.47    | 9.44     | 7.62     | 8.17     | 9.21     | 9.93     |
| 6  | 11.26 | 6.89 | 4.43   | 9.25    | 10.39    | 8.75     | 10.37    | 10.7     | 11.07    |
| 7  | 9.68  | 6.79 | 7.44   | 7.12    | 5.59     | 7.12     | 2.01     | 7.93     | 8.57     |
| 8  | 10.33 | 5.64 | 6.58   | 7.87    | 9.65     | 7.39     | 9.13     | 10.4     | 10.38    |
| 9  | 10.54 | 5.62 | 6.67   | 8.11    | 10.14    | 8.62     | 9.32     | 10.01    | 10.52    |
| 10 | 12.26 | 3.85 | 5.44   | 8.57    | 10.6     | 8.57     | 10.15    | 11.3     | 11.59    |
| 11 | 12.7  | 4.76 | 6.01   | 8.73    | 9.15     | 8.55     | 10.33    | 10.62    | 11.4     |
| 12 | 11.46 | 5.16 | 6.73   | 8.14    | 9.75     | 7.57     | 8.79     | 9.45     | 10.46    |
| 13 | 11.7  | 4.77 | 5.93   | 8.83    | 9.69     | 7.78     | 9.3      | 9.72     | 10.66    |
| 14 | 12.22 | 6.68 | 6.59   | 8.48    | 10.24    | 8.48     | 10.59    | 10.83    | 11.31    |
| 15 | 10.64 | 5.94 | 6.22   | 9.76    | 6.53     | 7.1      | 9.1      | 9.18     | 10.06    |
| 16 | 9.83  | 6.44 | 6.7    | 9.51    | 6.66     | 7.64     | 10.24    | 9.73     | 10.74    |
| 17 | 11.23 | 4.09 | 4.09   | 10.41   | 8.69     | 7.13     | 11.02    | 10.86    | 11.34    |
| 18 | 10.71 | 6.34 | 7.83   | 9.03    | 8.77     | 10.01    | 9.94     | 9.77     | 10.6     |
| 19 | 11.12 | 5.93 | 8.11   | 9.62    | 10.38    | 8.93     | 9.77     | 10.33    | 10.83    |
| 20 | 11.14 | 5.29 | 8.58   | 9.37    | 9.55     | 9.11     | 10.05    | 10.31    | 11.24    |
| 21 | 12.18 | 4.76 | 2.22   | 9.48    | 6.98     | 9.63     | 10.39    | 10.26    | 11.05    |
| 22 | 11.79 | 6.37 | 3.7    | 9.71    | 7.96     | 8.02     | 10       | 10.47    | 10.83    |
| 23 | 11.21 | 6.47 | 5.02   | 9.4     | 7.59     | 8.73     | 10.43    | 10.97    | 10.78    |
| 24 | 10.52 | 5.15 | 5.73   | 9.37    | 10.34    | 9.33     | 10.99    | 10.39    | 12.1     |
| 25 | 10.89 | 4.11 | 5.48   | 9.52    | 10       | 9.45     | 10.75    | 10.47    | 12.07    |
| 26 | 10.78 | 4.06 | 6.55   | 9.46    | 10.78    | 10.17    | 11.13    | 10.67    | 11.87    |
| 27 | 10.78 | 3.01 | 3.75   | 9.82    | 13.24    | 8.01     | 10.03    | 10.14    | 12.77    |
| 28 | 12.07 | 3.3  | 5.59   | 9.29    | 9.66     | 7.88     | 8.36     | 8.56     | 11.15    |
| 29 | 11.7  | 1.52 | 5.28   | 9.41    | 10.24    | 7.25     | 8.37     | 8.2      | 11.04    |
| 30 | 11.26 | 5.12 | 6.27   | 8.95    | 9.41     | 8.03     | 8.42     | 8.54     | 10.36    |
| 31 | 9.22  | 5.67 | 6.17   | 8.51    | 7.5      | 7.84     | 7.65     | 8.01     | 10.26    |
| 32 | 10.04 | 6.4  | 6.88   | 8.46    | 9.93     | 8.24     | 8.81     | 9.67     | 10.21    |
| 33 | 9.9   | 5.84 | 6.26   | 8.5     | 11.04    | 7.22     | 7.5      | 8.94     | 10.32    |
| 34 | 9.94  | 6.69 | 6.94   | 8.4     | 8.84     | 8.14     | 9.15     | 9.34     | 10.12    |
| 35 | 7.25  | 5.15 | 5.18   | 8.01    | 6.71     | 6.42     | 9.11     | 8.95     | 8.56     |
| 36 | 12.11 | 5.94 | 7.65   | 9.6     | 9.7      | 9.3      | 10.71    | 10.46    | 11.86    |
| 37 | 12    | 4.86 | 7.79   | 9.43    | 8.88     | 9.67     | 9.71     | 9.69     | 11.48    |
| 38 | 12.4  | 6.42 | 7.85   | 9.47    | 9.24     | 8.28     | 10.77    | 10.38    | 11.64    |
| 39 | 9.38  | 4.69 | 0.45   | 7.92    | 8.82     | 9.11     | 9.08     | 10.37    | 9.79     |
| 40 | 9.36  | 5.99 | 1.73   | 7.41    | 8.87     | 9        | 9.23     | 10.66    | 10.1     |
| 41 | 9.1   | 5.76 | 2.69   | 7.41    | 8.09     | 8.85     | 10.04    | 11.11    | 10.22    |
| 42 | 9     | 4.74 | 3.44   | 7.58    | 9.04     | 8.18     | 9.91     | 10.94    | 9.84     |
| 43 | 10.13 | 5.44 | 6.98   | 7.83    | 6.58     | 8.67     | 8.95     | 8.89     | 9.71     |
| 44 | 10.11 | 5.07 | 7.41   | 7.41    | 6.65     | 7.86     | 8.34     | 9.16     | 9.84     |
| 45 | 10.38 | 5.39 | 7.78   | 7.42    | 5.8      | 7.72     | 8.12     | 8.83     | 9.51     |
| 46 | 10.66 | 4.57 | 7.37   | 7.89    | 5.24     | 7.15     | 8.72     | 9.28     | 9.96     |
| 47 | 12.1  | 2.86 | 2.86   | 8.64    | 9.77     | 7.67     | 7.99     | 8.72     | 11.64    |
| 48 | 10.21 | 2.31 | 4.4    | 8.66    | 9        | 7.37     | 9.5      | 9.61     | 9.83     |
| 49 | 10.6  | 2.32 | 3      | 8.67    | 9.13     | 8.55     | 10.29    | 10.13    | 10.63    |
| 50 | 10.03 | 3.98 | 4.33   | 8.64    | 8.94     | 9.2      | 11       | 10.9     | 10.78    |
| 51 | 11.96 | 4.44 | 4.88   | 10.17   | 10.97    | 8.81     | 10.48    | 11.01    | 11.23    |
| 52 | 11.44 | 5.1  | 6.35   | 10.08   | 10.72    | 8.73     | 9.75     | 11       | 11.62    |
| 53 | 11.83 | 3.67 | 6.6    | 9.6     | 10.14    | 8.12     | 9.25     | 10.5     | 10.91    |

<https://mc.manuscriptcentral.com/gut>

|    |       |      |      |       |       |       |       |       |       |
|----|-------|------|------|-------|-------|-------|-------|-------|-------|
| 1  |       |      |      |       |       |       |       |       |       |
| 2  | 11.38 | 4.6  | 6.29 | 9.89  | 10.65 | 9.06  | 10.06 | 11.46 | 11.6  |
| 3  | 10.32 | 5.2  | 5.39 | 9.74  | 5.96  | 7.55  | 8.72  | 8.46  | 11.01 |
| 4  | 10.53 | 6.38 | 6.17 | 9.83  | 5.74  | 8.89  | 8.68  | 9.07  | 10.85 |
| 5  | 10.5  | 5.6  | 5.68 | 9.99  | 6.33  | 8.54  | 8.5   | 9.07  | 10.71 |
| 6  | 10.27 | 5.39 | 6.22 | 9.74  | 5.87  | 7.82  | 8.97  | 9.68  | 10.4  |
| 7  | 11.76 | 3.23 | 4.4  | 8.46  | 6.01  | 8.85  | 9.52  | 9.55  | 10.38 |
| 8  | 12.34 | 1.83 | 6.67 | 8.79  | 7.36  | 10.17 | 9.37  | 9.93  | 10.86 |
| 9  | 12.27 | 3    | 7.01 | 8.72  | 4.62  | 6.85  | 7.87  | 8.32  | 11.54 |
| 10 | 12.15 | 3.44 | 8.08 | 8.78  | 6.44  | 8.33  | 9.83  | 10.75 | 11.73 |
| 11 | 10.61 | 3.28 | 3.97 | 10.99 | 9.99  | 7.79  | 9.01  | 9.29  | 10.63 |
| 12 | 10.53 | 4.35 | 4.13 | 10.13 | 8.64  | 8.3   | 8.77  | 9.46  | 10.46 |
| 13 | 10.28 | 4.14 | 2.99 | 10.41 | 9.41  | 7.68  | 8.48  | 9.02  | 10.65 |
| 14 | 10.09 | 3.3  | 4.15 | 10.24 | 7.74  | 7.88  | 9.3   | 9.67  | 10.42 |
| 15 | 12.01 | 7.47 | 6.74 | 7.47  | 7.47  | 6.15  | 6.15  | 8.74  | 9.54  |
| 16 | 11.39 | 5.96 | 3.96 | 7.82  | 7.77  | 7.39  | 8.68  | 10.07 | 10.99 |
| 17 | 10.53 | 6.29 | 5.89 | 7.85  | 7.59  | 7.54  | 8.71  | 10.21 | 10.54 |
| 18 | 8.15  | 7.61 | 7.13 | 7.53  | 6.92  | 5.77  | 0.24  | 6.81  | 7.82  |
| 19 | 9.17  | 7.45 | 6.42 | 7.13  | 6.3   | 7.04  | 3.58  | 7.06  | 8.05  |
| 20 | 10.24 | 4.31 | 5.84 | 9.26  | 7.3   | 7.42  | 7.01  | 7.82  | 11    |
| 21 | 10.6  | 4.07 | 6    | 9.41  | 6.61  | 7.43  | 6.71  | 7.27  | 10.93 |
| 22 | 10.24 | 5.51 | 6.37 | 9.21  | 6.45  | 7.83  | 8.26  | 8.82  | 10.49 |
| 23 | 11.49 | 5.57 | 2.9  | 10.33 | 5.45  | 9.18  | 10.62 | 10.75 | 11.3  |
| 24 | 11.42 | 4.6  | 5.67 | 10    | 5.45  | 8.74  | 10.32 | 10.46 | 11.03 |
| 25 | 11.25 | 6.26 | 7.78 | 9.39  | 5.51  | 9.51  | 10.37 | 10.17 | 10.9  |
| 26 | 10.55 | 3.64 | 6.06 | 10.23 | 9.68  | 9.44  | 9.6   | 10.4  | 11.13 |
| 27 | 10.3  | 4.43 | 5.74 | 10.93 | 9.3   | 9.98  | 10.2  | 11.05 | 12.04 |
| 28 | 10.21 | 4.5  | 5.82 | 11.11 | 7.73  | 9.97  | 10.35 | 11.88 | 11.88 |
| 29 | 9.66  | 6.19 | 6.11 | 9.92  | 8.53  | 8.79  | 9     | 9.79  | 11.12 |
| 30 | 9.44  | 6.42 | 5.91 | 10.16 | 7.71  | 8.8   | 9.08  | 10.1  | 11.31 |
| 31 | 9.39  | 6.56 | 6.24 | 9.86  | 7.78  | 8.77  | 9.38  | 10.04 | 11.12 |
| 32 | 10.16 | 6.72 | 7.06 | 10.08 | 9.85  | 8.83  | 9.91  | 9.99  | 10.38 |
| 33 | 10.42 | 5.93 | 6.62 | 9.98  | 10.56 | 7.35  | 8.21  | 9.28  | 10.11 |
| 34 | 10.54 | 6.38 | 7.14 | 9.87  | 10.02 | 7.85  | 8.15  | 8.88  | 10.04 |
| 35 | 10.74 | 5.48 | 7.38 | 8.77  | 8.45  | 10.05 | 10.23 | 10.27 | 11.12 |
| 36 | 10.89 | 5.86 | 7.04 | 8.86  | 9.16  | 9.74  | 9.65  | 9.96  | 10.94 |
| 37 | 11.02 | 6.11 | 7    | 8.9   | 8.42  | 11.41 | 11.09 | 10.5  | 11.67 |
| 38 | 9.87  | 6.05 | 6.74 | 8.5   | 7.62  | 10.82 | 10.36 | 10.02 | 10.29 |
| 39 | 9.87  | 6.05 | 6.74 | 8.5   | 7.62  | 10.82 | 10.36 | 10.02 | 10.29 |
| 40 | 11.16 | 6.13 | 6.49 | 8.6   | 6.36  | 8.89  | 9.66  | 10.5  | 10.18 |
| 41 | 10.94 | 6.06 | 7.42 | 8.66  | 7.75  | 10.14 | 9.98  | 10.32 | 10.24 |
| 42 | 10.66 | 6.23 | 6.88 | 8.88  | 6.73  | 10.64 | 11.06 | 10.86 | 10.98 |
| 43 | 10.63 | 6.23 | 7.77 | 7.88  | 7.27  | 8.29  | 7.84  | 8.65  | 9.62  |
| 44 | 12.05 | 6.64 | 7.24 | 8.48  | 10.46 | 8.81  | 9.38  | 9.92  | 10.88 |
| 45 | 11.75 | 6.25 | 6.42 | 8.6   | 11.18 | 8.33  | 8.81  | 9.18  | 10.33 |
| 46 | 11.21 | 6.57 | 7.66 | 8.13  | 9.85  | 7.59  | 9.41  | 9.82  | 10.05 |
| 47 | 10.97 | 5.7  | 3.63 | 10.37 | 8.56  | 8.29  | 10.01 | 10.18 | 11.32 |
| 48 | 11.16 | 3.98 | 4.4  | 10.29 | 8.6   | 7.84  | 8.72  | 8.77  | 10.99 |
| 49 | 11.08 | 4.84 | 3.69 | 10.13 | 9.46  | 7.98  | 10.21 | 10    | 11.7  |
| 50 | 9.29  | 6.2  | 7.27 | 8.48  | 6.24  | 9.03  | 9.52  | 9.09  | 9.6   |
| 51 | 9.58  | 6.81 | 7.4  | 8.59  | 8.61  | 9.17  | 10.89 | 10.4  | 10.94 |
| 52 | 9.42  | 5.98 | 7.26 | 8.62  | 6.76  | 7.81  | 10.74 | 10.52 | 10.35 |
| 53 | 10.32 | 5.75 | 7.36 | 7.84  | 7.43  | 7.19  | 8.57  | 9.69  | 10.06 |

<https://mc.manuscriptcentral.com/gut>

|    |       |      |      |      |       |       |       |       |       |
|----|-------|------|------|------|-------|-------|-------|-------|-------|
| 1  |       |      |      |      |       |       |       |       |       |
| 2  | 10.58 | 5.98 | 7.25 | 8    | 8.35  | 8.43  | 8.71  | 9.9   | 10.47 |
| 3  | 10.15 | 7.04 | 7.38 | 7.54 | 7     | 7.34  | 8.36  | 9.68  | 10.62 |
| 4  | 10.07 | 4.25 | 3.57 | 8.95 | 8.71  | 8.99  | 10.08 | 9.54  | 9.66  |
| 5  | 10.83 | 5.8  | 6.21 | 9.3  | 8.85  | 10.28 | 10.65 | 10.49 | 10.62 |
| 6  | 10.74 | 4.66 | 6.81 | 9.31 | 9.22  | 9.47  | 11.53 | 11.43 | 11.15 |
| 7  | 10.59 | 5.45 | 6.05 | 8.67 | 8.87  | 9.47  | 10.67 | 10.63 | 10.84 |
| 8  | 11.52 | 4.3  | 3.13 | 9.42 | 10.84 | 8.76  | 9.29  | 9.56  | 11.53 |
| 9  | 11.52 | 6.3  | 4.22 | 9.17 | 11.1  | 8.73  | 9.77  | 9.98  | 11.63 |
| 10 | 12.9  | 5.08 | 4.08 | 9.05 | 11.79 | 8.3   | 10.2  | 10.6  | 12.46 |
| 11 | 11.67 | 5.04 | 6.7  | 9    | 10.56 | 8.61  | 9.81  | 9.43  | 11.21 |
| 12 | 11.09 | 4.58 | 7.63 | 9.26 | 9.44  | 7.56  | 8.73  | 9.77  | 10.4  |
| 13 | 10.85 | 5.87 | 7.62 | 8.55 | 8.96  | 7.58  | 7.75  | 9.14  | 9.91  |
| 14 | 13.05 | 5.07 | 6.17 | 9.08 | 9.12  | 7.35  | 10.92 | 10.78 | 12.35 |
| 15 | 9.95  | 7.81 | 7.6  | 6.81 | 6.17  | 7.91  | 0.2   | 8.31  | 8.64  |
| 16 | 10    | 5.59 | 2.53 | 8.92 | 6.5   | 8.18  | 8.29  | 8.69  | 11.27 |
| 17 | 9.88  | 6.14 | 1.83 | 9.11 | 7.56  | 8.35  | 8.12  | 8.24  | 11.22 |
| 18 | 9.94  | 5.5  | 3.52 | 9.1  | 7.04  | 7.58  | 8.41  | 8.76  | 10.98 |
| 19 | 9.86  | 4.02 | 3.89 | 8.04 | 11.29 | 6.96  | 9.56  | 11.35 | 11.23 |
| 20 | 9.84  | 4.88 | 4.26 | 7.58 | 11.1  | 6.54  | 9.34  | 10.93 | 10.84 |
| 21 | 10.32 | 4.89 | 3.1  | 7.79 | 11.37 | 7.83  | 9.75  | 11.35 | 10.94 |
| 22 | 15.26 | 5.16 | 6.75 | 6.75 | 7.97  | 6.75  | 6.16  | 6.75  | 10.49 |
| 23 | 11.46 | 3.89 | 7.7  | 8.1  | 9.18  | 8.51  | 7.75  | 8.34  | 10.15 |
| 24 | 11.71 | 3.34 | 7.54 | 8.44 | 10.03 | 7.66  | 9.43  | 9.81  | 10.21 |
| 25 | 12.56 | 1.18 | 6.47 | 9.08 | 11.07 | 6.99  | 9.82  | 10.75 | 11.65 |
| 26 | 12.78 | 4.23 | 6.19 | 9.32 | 10.04 | 7.15  | 10.49 | 10.62 | 12    |
| 27 | 11.75 | 4.13 | 7.16 | 9.12 | 9.98  | 9.47  | 11.4  | 11.28 | 12.23 |
| 28 | 9.34  | 6.85 | 7.93 | 7.57 | 7.39  | 9.42  | 6.35  | 8.99  | 8.69  |
| 29 | 8.81  | 6.76 | 8.02 | 7.09 | 5.32  | 9.3   | 1.86  | 8.06  | 8.22  |
| 30 | 8.92  | 6.9  | 7.55 | 7.38 | 6.09  | 8.02  | 1.77  | 7.77  | 8     |
| 31 | 10.34 | 5.01 | 6.4  | 8.22 | 7.97  | 9.06  | 10.72 | 9.74  | 10.16 |
| 32 | 9.66  | 4.88 | 5.86 | 8.22 | 8.4   | 8.61  | 11.07 | 10.68 | 11.05 |
| 33 | 10.26 | 4.5  | 5.43 | 8.09 | 9.4   | 8.45  | 10.34 | 9.82  | 10.14 |
| 34 | 9.55  | 4.8  | 4.74 | 8.19 | 7.73  | 11.32 | 11.85 | 10.93 | 11    |
| 35 | 8.16  | 5.84 | 6.79 | 6.83 | 5.54  | 5.7   | 6.33  | 8.01  | 7.78  |
| 36 | 8.79  | 5.54 | 7.06 | 6.71 | 5.46  | 7.11  | 4.5   | 7.34  | 7.92  |
| 37 | 8.91  | 5.53 | 6.76 | 6.76 | 6.44  | 6.57  | 5.1   | 7.74  | 8.31  |
| 38 | 7.39  | 6.33 | 6.62 | 6.9  | 5.21  | 5.39  | 0     | 6.28  | 6.52  |
| 39 | 8.21  | 5.51 | 7.09 | 7.06 | 5.51  | 7.29  | 2.92  | 7.4   | 7.64  |
| 40 | 8.56  | 5.68 | 7.14 | 6.56 | 5.42  | 7.18  | 5     | 8.29  | 7.89  |
| 41 | 8.31  | 6.12 | 7.28 | 6.75 | 5.31  | 7.06  | 5.86  | 8.44  | 7.92  |
| 42 | 7.97  | 5.73 | 4.73 | 6.5  | 5.41  | 2.41  | 2.41  | 5.41  | 4.73  |
| 43 | 9.12  | 6.78 | 8.09 | 7.78 | 6.34  | 8.46  | 5.3   | 8.74  | 8.01  |
| 44 | 9.27  | 7.27 | 8.15 | 7.94 | 5.79  | 8.63  | 1.65  | 8.41  | 8.45  |
| 45 | 10.56 | 6.15 | 7.28 | 7.57 | 5.62  | 7.77  | 6     | 9.04  | 9.38  |
| 46 | 9.47  | 6.91 | 7.83 | 7.6  | 5.73  | 7.61  | 4.07  | 8.61  | 8.3   |
| 47 | 9.57  | 6.66 | 7.79 | 7.48 | 6.78  | 8.07  | 8.77  | 9.29  | 9.46  |
| 48 | 9.81  | 7.38 | 8.98 | 7.34 | 6.86  | 7.68  | 6.08  | 9.06  | 8.87  |
| 49 | 8.79  | 7.5  | 9.09 | 7.6  | 5.51  | 7.74  | 2.29  | 8.38  | 8.24  |
| 50 | 8.43  | 7.32 | 7.79 | 7.57 | 5.99  | 6.42  | 6.96  | 8.99  | 8.35  |
| 51 | 9.16  | 5.47 | 6.35 | 8.57 | 5.98  | 7.64  | 9.14  | 9.05  | 9.41  |
| 52 | 9.74  | 5.5  | 6.61 | 8.81 | 5.85  | 7.34  | 9.11  | 9.12  | 10.23 |
| 53 | 9.34  | 5.76 | 6.94 | 8.52 | 6.04  | 7.98  | 9.23  | 9.21  | 10.29 |
| 54 |       |      |      |      |       |       |       |       |       |
| 55 |       |      |      |      |       |       |       |       |       |
| 56 |       |      |      |      |       |       |       |       |       |
| 57 |       |      |      |      |       |       |       |       |       |
| 58 |       |      |      |      |       |       |       |       |       |
| 59 |       |      |      |      |       |       |       |       |       |
| 60 |       |      |      |      |       |       |       |       |       |

<https://mc.manuscriptcentral.com/gut>



|    |       |      |      |       |       |       |       |       |       |
|----|-------|------|------|-------|-------|-------|-------|-------|-------|
| 1  |       |      |      |       |       |       |       |       |       |
| 2  | 9.01  | 5.76 | 7.13 | 8.34  | 6.34  | 7.87  | 9.4   | 9.5   | 9.84  |
| 3  | 9.44  | 6.19 | 5.94 | 9.84  | 11.7  | 10.25 | 10.68 | 10.09 | 11.15 |
| 4  | 10.21 | 6.14 | 6.08 | 9.72  | 10.95 | 9.53  | 10.45 | 9.72  | 11.42 |
| 5  | 9.6   | 5.99 | 6.06 | 9.6   | 11.01 | 8.8   | 8.8   | 8.67  | 10.85 |
| 6  | 9.65  | 6    | 5.97 | 9.67  | 11.28 | 8.61  | 8.89  | 8.77  | 10.73 |
| 7  | 11.01 | 6.44 | 5.44 | 9.68  | 11.49 | 8.87  | 9.99  | 10.28 | 11.13 |
| 8  | 12.63 | 5.54 | 6.65 | 9.66  | 10.58 | 7.28  | 10.69 | 11.04 | 11.34 |
| 9  | 12.74 | 5.3  | 7.09 | 9.85  | 11.5  | 7.6   | 9.98  | 10.56 | 10.93 |
| 10 | 12.25 | 4.55 | 6.1  | 9.41  | 8.56  | 7.31  | 11.49 | 11.71 | 11.34 |
| 11 | 12.75 | 3.76 | 7.84 | 9.84  | 8.14  | 10.07 | 9.7   | 10.22 | 12.08 |
| 12 | 13.03 | 5.63 | 8.8  | 9.49  | 8.08  | 7.92  | 9.8   | 10.95 | 11.69 |
| 13 | 13.29 | 5.03 | 8.73 | 9.45  | 8.31  | 8.53  | 10.02 | 10.76 | 12.03 |
| 14 | 12.8  | 4.46 | 8.97 | 9.6   | 7.51  | 8.16  | 9.24  | 10.41 | 11.83 |
| 15 | 12.56 | 4.52 | 5.67 | 8.76  | 11.07 | 7.38  | 9.22  | 9.17  | 10.08 |
| 16 | 13.01 | 2.97 | 2.51 | 9.43  | 12.13 | 8.01  | 9.34  | 9.84  | 10.72 |
| 17 | 12.58 | 5.64 | 6.03 | 8.59  | 10.45 | 8.01  | 10.49 | 10.98 | 10.79 |
| 18 | 7.98  | 5    | 6.37 | 9.19  | 7.39  | 7.5   | 11.16 | 10.68 | 10.85 |
| 19 | 10.21 | 2.99 | 3.47 | 9.54  | 10.11 | 7.66  | 10.82 | 10.41 | 11.22 |
| 20 | 10.38 | 4.52 | 7    | 9.25  | 10    | 8.05  | 11.09 | 11    | 11.62 |
| 21 | 10.81 | 4.1  | 5.29 | 9.46  | 8.83  | 8.73  | 10.36 | 10.02 | 10.44 |
| 22 | 10.63 | 4.24 | 2.13 | 9.98  | 8.82  | 8.84  | 10.11 | 9.77  | 11.71 |
| 23 | 10.79 | 4.48 | 1.8  | 10.48 | 10.45 | 7.1   | 8.66  | 8.46  | 10.66 |
| 24 | 12.02 | 6.06 | 5.75 | 8.31  | 8.94  | 10.16 | 10.06 | 10.52 | 10.18 |
| 25 | 13.02 | 5.57 | 5.25 | 8.55  | 7.66  | 9.9   | 9.63  | 10.26 | 10.45 |
| 26 | 14.33 | 6.96 | 5.15 | 8.58  | 6.96  | 11.01 | 10.66 | 11.35 | 11.41 |
| 27 | 8.91  | 3.95 | 1.36 | 8.36  | 6.89  | 8.69  | 9.22  | 9.23  | 8.95  |
| 28 | 8.73  | 6    | 3.11 | 8.12  | 8.05  | 7.55  | 9.33  | 9.83  | 9.3   |
| 29 | 9.45  | 5.29 | 0    | 8.48  | 6.62  | 6.86  | 8.82  | 9.34  | 10.19 |
| 30 | 9.95  | 7.19 | 5.36 | 7.73  | 7.78  | 8.9   | 10.03 | 10.12 | 10.49 |
| 31 | 7.78  | 6.22 | 6.46 | 7.01  | 5.34  | 6.93  | 3.34  | 7.57  | 7.18  |
| 32 | 8.18  | 5.76 | 6.97 | 6.5   | 7.2   | 6.87  | 6.5   | 7.77  | 8.6   |
| 33 | 7.72  | 6.82 | 6.93 | 6.86  | 4.34  | 6.84  | 1.88  | 7.42  | 7.28  |
| 34 | 7.81  | 5.96 | 7.17 | 6.76  | 4.66  | 7.09  | 4.28  | 7.75  | 7.31  |
| 35 | 9.47  | 4.45 | 5.55 | 7.84  | 10.19 | 8.01  | 6.85  | 7.59  | 8.45  |
| 36 | 8.62  | 5.22 | 5.73 | 7.68  | 8.65  | 7.28  | 7.44  | 8.8   | 8.12  |
| 37 | 8.61  | 5.74 | 6.26 | 7.68  | 9.39  | 8.14  | 8.33  | 9.1   | 8.81  |
| 38 | 8.93  | 5.4  | 5.91 | 7.65  | 9.13  | 9.89  | 9.35  | 9.6   | 9.79  |
| 39 | 7.1   | 6.95 | 1.94 | 8.79  | 6.4   | 8.14  | 9.88  | 9.34  | 9.05  |
| 40 | 10.59 | 5.63 | 4.27 | 9.27  | 9.21  | 6.85  | 9.72  | 10.03 | 11.28 |
| 41 | 12.37 | 5.23 | 3.23 | 8.81  | 7.42  | 7.11  | 8.97  | 10.25 | 10.93 |
| 42 | 13.48 | 4.55 | 5.4  | 8.93  | 8.16  | 6.14  | 9.51  | 10.2  | 11.58 |
| 43 | 12.4  | 4.8  | 6.63 | 8.37  | 8.7   | 7.96  | 9.46  | 9.15  | 10.09 |
| 44 | 13.54 | 4.51 | 4.51 | 8.6   | 7.51  | 4.51  | 9.83  | 10.18 | 11.66 |
| 45 | 11.23 | 2.19 | 8.38 | 8.56  | 7.78  | 7.85  | 10.35 | 10.47 | 10.87 |
| 46 | 11.59 | 2.74 | 8.11 | 8.62  | 6.04  | 8.86  | 10.86 | 10.92 | 11.47 |
| 47 | 10.06 | 0.68 | 0.68 | 9.62  | 11.22 | 4.27  | 6.49  | 8.65  | 11.36 |
| 48 | 10.35 | 4.79 | 4.89 | 9.05  | 10.77 | 7.32  | 9.55  | 10.28 | 11.29 |
| 49 | 9.92  | 3.45 | 4.18 | 9.52  | 10.54 | 7.39  | 9.71  | 10.23 | 11.42 |
| 50 | 10.1  | 4.96 | 5.68 | 9.09  | 10.18 | 7.72  | 9.17  | 9.95  | 10.99 |
| 51 | 9.05  | 3.66 | 6.37 | 8.65  | 6.72  | 9.9   | 10.25 | 8.8   | 10.4  |
| 52 | 8.25  | 3.34 | 6.08 | 7.89  | 7.24  | 6.94  | 9.98  | 9.87  | 9.27  |
| 53 | 8.39  | 4.29 | 5.92 | 7.79  | 7.39  | 7.6   | 9.86  | 9.75  | 9.08  |

|       |      |      |      |       |      |       |       |       |
|-------|------|------|------|-------|------|-------|-------|-------|
| 9.47  | 3.11 | 6.54 | 8.56 | 6.43  | 7.56 | 9.92  | 10.41 | 9.83  |
| 9.11  | 4.42 | 3.68 | 8.01 | 8.54  | 8.53 | 10.79 | 9.51  | 11.35 |
| 8.09  | 3.17 | 4.29 | 8.27 | 5.23  | 8.75 | 8.72  | 8.67  | 11.06 |
| 8.17  | 3.95 | 2.49 | 8.82 | 6.72  | 6.64 | 8.68  | 8.44  | 11.38 |
| 8.95  | 6.72 | 6.01 | 6.76 | 4.55  | 7.28 | 7.01  | 8     | 10.14 |
| 7.94  | 5.02 | 0.57 | 8.49 | 7.02  | 10.7 | 9.95  | 9.7   | 9.8   |
| 7.64  | 3.32 | 1.39 | 8.67 | 6.13  | 7.79 | 7.59  | 7.95  | 8.89  |
| 8.11  | 3.35 | 0.35 | 8.83 | 5.84  | 7.39 | 7.22  | 7.8   | 8.83  |
| 8.56  | 6.56 | 7.7  | 6.83 | 5.13  | 8.21 | 1.86  | 7.23  | 7.53  |
| 8.95  | 5.82 | 6.83 | 7.77 | 7.27  | 7.72 | 8.8   | 8.64  | 9.11  |
| 10.94 | 0.65 | 6.38 | 8.54 | 7.95  | 8.16 | 10.66 | 9.92  | 9.75  |
| 9.99  | 3.47 | 6.53 | 8.38 | 10.21 | 7.6  | 10.09 | 9.88  | 9.72  |
| 10.19 | 2.3  | 6.16 | 8.63 | 10    | 7.34 | 10.66 | 10.25 | 9.93  |
| 9.12  | 4.37 | 5.52 | 8.44 | 7.34  | 9.52 | 11.85 | 10.86 | 10.6  |
| 14.85 | 2.54 | 4.54 | 9.43 | 7.45  | 8.79 | 9.53  | 8.67  | 11.44 |
| 10.49 | 4.26 | 3.26 | 8.75 | 10.34 | 7.35 | 8.95  | 9.83  | 10.52 |
| 9.69  | 4.93 | 5.09 | 7.75 | 8.86  | 7.04 | 8.81  | 9.14  | 9.18  |
| 10.7  | 3.21 | 3.34 | 9.01 | 10.19 | 7.06 | 9.14  | 9.9   | 10.58 |

1  
2  
3  
4  
5  
6  
7  
8  
9  
10  
11  
12  
13  
14  
15  
16  
17  
18  
19  
20  
21  
22  
23  
24  
25  
26  
27  
28  
29  
30  
31  
32  
33  
34  
35  
36  
37  
38  
39  
40  
41  
42  
43  
44  
45  
46  
47  
48  
49  
50  
51  
52  
53  
54  
55  
56  
57  
58  
59  
60

| SET   | SETD2 | SFRP1 | SFRP2 | SH2B3 | SH2D3A | SH3YL1 | SHB  | SIRT1 |
|-------|-------|-------|-------|-------|--------|--------|------|-------|
| 8.22  | 8.31  | 6.23  | 7.6   | 7.7   | 7.76   | 6.05   | 6.41 | 7.41  |
| 9.15  | 8.17  | 4.84  | 4.74  | 7.96  | 7.76   | 6.72   | 6.31 | 7.13  |
| 9     | 8.22  | 5.54  | 5.25  | 7.46  | 7.65   | 7.01   | 6.23 | 7.16  |
| 9.71  | 8.93  | 7     | 8.36  | 7.34  | 7.3    | 7.62   | 5.73 | 6.97  |
| 8.56  | 7.56  | 6.84  | 5.92  | 8.45  | 8.38   | 8.19   | 7.76 | 7.97  |
| 8.57  | 8.56  | 5.7   | 7.76  | 7.55  | 7.74   | 6.5    | 6    | 7.02  |
| 8.71  | 8.58  | 5.73  | 7.29  | 7.98  | 7.62   | 6.43   | 6.39 | 7.19  |
| 9.67  | 9.08  | 5.04  | 9.06  | 7.62  | 7.7    | 8.1    | 5.52 | 6.28  |
| 8.85  | 8.91  | 5.12  | 7.42  | 7.51  | 7.05   | 7.69   | 5.61 | 6.6   |
| 8.54  | 8.5   | 4.37  | 7.26  | 6.93  | 7.35   | 7.21   | 6.06 | 6.68  |
| 9.17  | 8.92  | 3.96  | 6.99  | 7.4   | 7.38   | 7.38   | 5.87 | 6.93  |
| 9.05  | 8.93  | 6.07  | 9.21  | 7.49  | 7.04   | 7.09   | 5.38 | 6.85  |
| 10.45 | 8.94  | 4.58  | 8.04  | 7.33  | 8.31   | 7.24   | 6.46 | 6.83  |
| 9.98  | 8.7   | 4.8   | 8.59  | 7.67  | 7.83   | 6.96   | 6.57 | 7.43  |
| 10.83 | 8.95  | 5.67  | 8.76  | 6.52  | 7.44   | 9.24   | 6.09 | 6.72  |
| 9.14  | 8.81  | 6.19  | 9.26  | 8.02  | 7.47   | 6.94   | 6.94 | 7.51  |
| 9.05  | 8.79  | 6.15  | 8.9   | 7.65  | 7.98   | 6.99   | 7.17 | 7.63  |
| 8.89  | 9     | 6.67  | 10.45 | 7.61  | 8.1    | 7.3    | 6.93 | 7.36  |
| 9.85  | 9.69  | 5.07  | 8.91  | 7.77  | 8.21   | 9.27   | 6.15 | 7.04  |
| 9.8   | 9.2   | 5.77  | 8.75  | 8     | 8.02   | 8.18   | 6.15 | 7.26  |
| 9.69  | 9.45  | 6.68  | 9.33  | 8.26  | 7.56   | 8.41   | 6.33 | 7.49  |
| 10.13 | 9.2   | 5.64  | 7.54  | 7.65  | 8.57   | 8.65   | 6.19 | 7.4   |
| 10.2  | 9.21  | 4.45  | 6.67  | 7.35  | 8.55   | 9      | 6.48 | 7.32  |
| 9.83  | 9.21  | 6.73  | 9.16  | 7.39  | 8.35   | 8.62   | 6.58 | 7.42  |
| 9.45  | 9.04  | 5.82  | 7.28  | 6.8   | 5.6    | 5.89   | 4.67 | 7.13  |
| 9.93  | 9.31  | 3.59  | 4.3   | 7.22  | 8.79   | 7.57   | 5.34 | 7.32  |
| 9.71  | 9.19  | 3.69  | 4.91  | 6.88  | 8.46   | 7.56   | 5.16 | 7.06  |
| 9.18  | 8.94  | 5.96  | 6.36  | 7.46  | 8.4    | 7.27   | 5.7  | 7.41  |
| 9.56  | 8.79  | 5.28  | 5.43  | 7.4   | 7.51   | 7.12   | 6.97 | 7.57  |
| 9.23  | 8.79  | 6.58  | 8.22  | 7.38  | 7.78   | 7.42   | 6.63 | 7.34  |
| 9.62  | 8.93  | 4.66  | 6.87  | 7.28  | 7.63   | 7.41   | 7.37 | 7.55  |
| 9.12  | 8.61  | 5.8   | 8.82  | 7.41  | 7.76   | 7.48   | 7.17 | 7.52  |
| 8.74  | 9.04  | 6     | 5.43  | 8.34  | 7.89   | 6.28   | 6.55 | 7.53  |
| 9.38  | 9.22  | 5.64  | 10.54 | 7.53  | 6.98   | 7.65   | 5.67 | 8.03  |
| 9.57  | 9.33  | 2.78  | 7.77  | 7.04  | 7.7    | 8.13   | 5.68 | 8.04  |
| 9.38  | 9.34  | 6.66  | 9.62  | 6.99  | 7.13   | 8.37   | 5.64 | 7.95  |
| 9.51  | 8.7   | 1.45  | 2.77  | 7.32  | 6.82   | 7.06   | 4.9  | 5.87  |
| 9.36  | 8.81  | 4.16  | 8.03  | 6.79  | 7.11   | 6.2    | 4.9  | 6.06  |
| 9.09  | 8.56  | 4.61  | 8.83  | 7.02  | 6.5    | 6.07   | 5.17 | 6.32  |
| 9.09  | 8.71  | 5.89  | 8.83  | 7.09  | 6.19   | 5.81   | 4.44 | 6.33  |
| 8.37  | 7.82  | 5.8   | 7.88  | 7.16  | 6.85   | 6.18   | 6.7  | 6.95  |
| 8.85  | 7.71  | 5.73  | 8.21  | 7.09  | 6.25   | 6.31   | 6.6  | 6.94  |
| 9.01  | 7.83  | 5.61  | 7.57  | 7.08  | 6.48   | 6.17   | 6.95 | 6.9   |
| 9.3   | 7.97  | 4.52  | 8.08  | 6.8   | 5.98   | 6.7    | 6.64 | 6.58  |
| 10.25 | 8.32  | 3.86  | 3.86  | 4.45  | 6.03   | 8.93   | 5.86 | 4.45  |
| 9.27  | 8.43  | 6.25  | 7.36  | 6.91  | 7.23   | 7.06   | 5.36 | 6.82  |
| 9.3   | 8.49  | 7.09  | 9.03  | 7.17  | 7.22   | 7.03   | 5    | 6.7   |
| 8.86  | 8.79  | 7     | 10.48 | 6.81  | 6.64   | 6.58   | 4.98 | 6.77  |
| 9.9   | 9.13  | 5.03  | 9.84  | 7.84  | 7.53   | 7.5    | 5.8  | 6.97  |
| 9.69  | 9.05  | 4.01  | 9.96  | 8     | 7.59   | 6.74   | 5.65 | 7.43  |
| 9.71  | 9.13  | 4.3   | 7.76  | 8.4   | 7.83   | 7.15   | 6.08 | 7.26  |

<https://mc.manuscriptcentral.com/gut>

1  
2  
3  
4  
5  
6  
7  
8  
9  
10  
11  
12  
13  
14  
15  
16  
17  
18  
19  
20  
21  
22  
23  
24  
25  
26  
27  
28  
29  
30  
31  
32  
33  
34  
35  
36  
37  
38  
39  
40  
41  
42  
43  
44  
45  
46  
47  
48  
49  
50  
51  
52  
53  
54  
55  
56  
57  
58  
59  
60

|       |      |      |       |      |       |       |      |      |
|-------|------|------|-------|------|-------|-------|------|------|
| 9.71  | 9.17 | 6.08 | 10.12 | 8.35 | 7.66  | 6.52  | 5.6  | 7.41 |
| 9.92  | 9.72 | 5.32 | 4.35  | 7.32 | 7.33  | 7.72  | 6.41 | 6.97 |
| 10.22 | 9.32 | 5.23 | 5.97  | 7.46 | 7.07  | 7.54  | 6.7  | 6.94 |
| 10.48 | 9.41 | 4.41 | 5.74  | 7.33 | 7.49  | 7.63  | 6.77 | 6.7  |
| 10.14 | 9.4  | 5.9  | 7.81  | 7.27 | 7.18  | 7.31  | 7.13 | 6.92 |
| 9.9   | 9.43 | 4.55 | 5.44  | 8.06 | 7.94  | 8.02  | 6.71 | 7.7  |
| 10.69 | 9.43 | 4.42 | 6.62  | 7.54 | 8.3   | 8.35  | 6.48 | 7.58 |
| 11    | 9.75 | 1.32 | 5.27  | 6.38 | 8.04  | 8.06  | 6.65 | 6.87 |
| 10.37 | 9.81 | 5.76 | 7.83  | 6.5  | 8.28  | 8.35  | 6.46 | 7.48 |
| 9.87  | 8.81 | 4.34 | 7.43  | 7.04 | 7.06  | 5.81  | 5.17 | 7.09 |
| 9.85  | 9.04 | 4.71 | 5.9   | 7.68 | 7.5   | 6.32  | 5.54 | 7.3  |
| 9.9   | 8.59 | 4.4  | 6.16  | 7.49 | 7.59  | 6.54  | 5.65 | 7.57 |
| 9.89  | 8.71 | 6.09 | 7.68  | 7.12 | 7.48  | 6.09  | 4.88 | 7.65 |
| 7.15  | 7.47 | 5.15 | 6.15  | 9.85 | 8.74  | 13.25 | 7.15 | 10.2 |
| 10.14 | 8.16 | 6.88 | 6.83  | 8.43 | 8.9   | 8.7   | 7.04 | 7.84 |
| 9.45  | 8.18 | 5.95 | 6.75  | 8.49 | 8.23  | 7.32  | 7.11 | 7.62 |
| 8.84  | 6.9  | 8.45 | 7.81  | 9.6  | 10.09 | 8.08  | 8.85 | 8.85 |
| 9.15  | 6.75 | 7.92 | 7.71  | 9.22 | 9.82  | 8.37  | 8.85 | 8.42 |
| 10.39 | 8.92 | 4.95 | 4.66  | 7.12 | 8     | 6.02  | 7.88 | 7.72 |
| 10.4  | 8.93 | 5.14 | 4.26  | 7.08 | 8.13  | 6.41  | 7.57 | 8.11 |
| 10.24 | 8.92 | 5.67 | 7.18  | 7.24 | 8.01  | 6.36  | 7.75 | 7.81 |
| 10.73 | 9.38 | 7.96 | 9.14  | 7.55 | 7.83  | 7.36  | 5.32 | 7.98 |
| 10.83 | 9.39 | 7.51 | 8.74  | 7.32 | 8.21  | 7.49  | 5.86 | 8.05 |
| 10.77 | 9.03 | 7.37 | 9.24  | 7.41 | 7.16  | 6.26  | 6.18 | 8.23 |
| 10.33 | 9.47 | 5.16 | 7.68  | 7.44 | 7.93  | 7.78  | 5.85 | 7.57 |
| 10.39 | 9.29 | 5.33 | 8.78  | 7.54 | 7.98  | 7.78  | 6.09 | 7.55 |
| 10.47 | 9.2  | 6.24 | 9.37  | 7.48 | 7.26  | 8.01  | 5.94 | 7.6  |
| 9.34  | 8.38 | 4.61 | 6.57  | 7.51 | 7.29  | 6.57  | 6.97 | 7.87 |
| 9.44  | 8.37 | 5.41 | 8.1   | 7.6  | 7.42  | 6.5   | 6.71 | 7.69 |
| 9.4   | 8.46 | 6.06 | 8.43  | 7.6  | 7.24  | 6.81  | 6.83 | 7.8  |
| 9.46  | 8.94 | 6.94 | 10.12 | 7.84 | 7.96  | 7.89  | 6.9  | 7.58 |
| 9.45  | 8.69 | 5.29 | 6.56  | 7.64 | 8.02  | 8.18  | 6.81 | 7.26 |
| 9.25  | 8.82 | 6.24 | 5.72  | 7.72 | 8.29  | 8.38  | 6.69 | 7.73 |
| 9     | 8.53 | 6.09 | 9.33  | 7.71 | 8.98  | 7.13  | 6.72 | 7.54 |
| 9.12  | 8.56 | 5.46 | 7.96  | 7.69 | 8.71  | 7.49  | 6.9  | 7.49 |
| 8.94  | 8.68 | 6.7  | 9.86  | 7.78 | 8.78  | 7.51  | 6.64 | 7.4  |
| 8.69  | 8.7  | 7.14 | 9.59  | 7.79 | 7.85  | 6.52  | 6.86 | 7.8  |
| 8.69  | 8.7  | 7.14 | 9.59  | 7.79 | 7.85  | 6.52  | 6.86 | 7.8  |
| 9.23  | 8.54 | 6.96 | 8.36  | 7.3  | 8.14  | 7.7   | 6.51 | 7.54 |
| 9.1   | 8.69 | 7.15 | 9.84  | 7.52 | 7.75  | 7.28  | 7.08 | 7.72 |
| 8.86  | 8.55 | 7.29 | 11.51 | 7.42 | 7.94  | 7.36  | 6.87 | 7.72 |
| 9.14  | 8.38 | 6.31 | 6.01  | 8.09 | 7.47  | 6.39  | 7.35 | 7.73 |
| 9.52  | 8.23 | 6    | 7.74  | 7.87 | 7.73  | 6.98  | 6.62 | 7.6  |
| 9.77  | 8.08 | 5.68 | 7.25  | 7.61 | 7.87  | 6.99  | 6.41 | 7.1  |
| 9.41  | 8.26 | 7.13 | 8.62  | 7.86 | 7.37  | 6.99  | 7    | 7.49 |
| 10.02 | 9.08 | 3.63 | 8.95  | 7.18 | 7.08  | 8.12  | 5.53 | 6.76 |
| 10.21 | 8.83 | 1.66 | 5.78  | 6.86 | 7.55  | 8.11  | 5.69 | 6.97 |
| 10.07 | 8.87 | 3.32 | 8.7   | 7.2  | 6.49  | 8.96  | 4.77 | 6.69 |
| 8.58  | 8.36 | 6.71 | 7.58  | 7.96 | 7.65  | 5.86  | 6.9  | 7.75 |
| 9.16  | 8.34 | 7.72 | 10.66 | 7.67 | 7.56  | 6.84  | 6.74 | 7.57 |
| 9.2   | 8.33 | 7.11 | 9.83  | 7.59 | 7.3   | 6.92  | 6.67 | 7.83 |
| 8.8   | 9.19 | 5.26 | 7.78  | 7.08 | 7.19  | 7.2   | 6.63 | 7.59 |

<https://mc.manuscriptcentral.com/gut>

|    |       |      |      |       |      |      |       |      |      |
|----|-------|------|------|-------|------|------|-------|------|------|
| 1  |       |      |      |       |      |      |       |      |      |
| 2  | 8.85  | 9.24 | 5.91 | 8.7   | 7.11 | 7.04 | 6.85  | 6.53 | 7.25 |
| 3  | 8.87  | 8.34 | 6.96 | 8.5   | 7.78 | 7.7  | 7.56  | 7.21 | 8.01 |
| 4  | 9.11  | 9.34 | 6.71 | 5.53  | 7.74 | 8.29 | 7.25  | 6.34 | 7.23 |
| 5  | 9.6   | 9.25 | 6.9  | 9.95  | 7.62 | 8.02 | 7.42  | 7.02 | 7.44 |
| 6  | 9.33  | 9.34 | 7.81 | 11.23 | 7.75 | 7.2  | 7.53  | 7    | 7.5  |
| 7  | 9.62  | 8.64 | 6.13 | 9.93  | 7.82 | 6.75 | 7.26  | 5.93 | 6.47 |
| 8  | 9.64  | 8.82 | 3.13 | 7.89  | 6.97 | 7.94 | 7.5   | 7.63 | 6.51 |
| 9  | 9.77  | 8.83 | 5.08 | 8.85  | 7.61 | 8.14 | 7.02  | 7.05 | 6.54 |
| 10 | 10.44 | 8.56 | 5.49 | 8.68  | 6.58 | 7.14 | 10.54 | 7.45 | 5.82 |
| 11 | 9.57  | 9.18 | 5.25 | 5.04  | 7.44 | 7.55 | 8.27  | 5.79 | 6.44 |
| 12 | 9.32  | 8.56 | 2.81 | 6.01  | 7.83 | 7.19 | 7.98  | 5.19 | 6.62 |
| 13 | 8.84  | 8.3  | 5.06 | 5.77  | 7.79 | 7.18 | 6.76  | 6.45 | 6.49 |
| 14 | 10.09 | 8.95 | 5.07 | 9.39  | 6.58 | 6.43 | 10.54 | 5.58 | 5.85 |
| 15 | 8.66  | 7.77 | 7.16 | 5.69  | 8.65 | 7.95 | 7.91  | 7.68 | 8.3  |
| 16 | 10.26 | 8.4  | 3.53 | 7.96  | 7.24 | 6.7  | 7.88  | 5.3  | 6.7  |
| 17 | 10.05 | 8.49 | 1.42 | 6.69  | 7.37 | 6.88 | 7.78  | 5.19 | 6.63 |
| 18 | 10.07 | 8.61 | 5.61 | 8.13  | 7.27 | 6.76 | 7.58  | 5.38 | 6.45 |
| 19 | 8.84  | 9.05 | 4.19 | 7.85  | 7.11 | 7.8  | 5.99  | 6.19 | 7.55 |
| 20 | 8.64  | 8.39 | 5.52 | 8.57  | 6.99 | 7.41 | 5.92  | 6.89 | 7.39 |
| 21 | 8.9   | 8.86 | 5.2  | 8.98  | 7.2  | 7.41 | 5.79  | 6.66 | 7.22 |
| 22 | 9.75  | 5.16 | 6.75 | 5.16  | 7.49 | 7.49 | 14.2  | 7.16 | 7.49 |
| 23 | 8.51  | 8.2  | 2.72 | 2.13  | 7.48 | 7.96 | 7.11  | 5.58 | 7.32 |
| 24 | 8.76  | 8.54 | 4.99 | 7.14  | 7.51 | 7.59 | 7.16  | 5.39 | 7.25 |
| 25 | 9.56  | 8.7  | 4.5  | 7.77  | 6.13 | 7.64 | 9.25  | 5.43 | 5.64 |
| 26 | 9.93  | 8.69 | 5.91 | 7.94  | 6.55 | 7.59 | 9.99  | 5.86 | 5.99 |
| 27 | 9.3   | 8.93 | 7.5  | 11.02 | 7.07 | 7.56 | 7.95  | 5.59 | 6.93 |
| 28 | 8.35  | 7.49 | 6.21 | 6.08  | 7.67 | 7.88 | 6.04  | 7.3  | 7.72 |
| 29 | 8.43  | 7.23 | 6.59 | 6.22  | 8.25 | 7.96 | 6.32  | 7.52 | 8.15 |
| 30 | 8.37  | 7.41 | 6.57 | 6.29  | 8.11 | 7.72 | 6.16  | 7.32 | 8.09 |
| 31 | 8.11  | 8.08 | 8.07 | 9.05  | 6.9  | 6.16 | 5.79  | 4.26 | 6.18 |
| 32 | 8.61  | 7.97 | 7.88 | 10.13 | 6.51 | 5.72 | 5.42  | 4.98 | 6.19 |
| 33 | 8.65  | 7.92 | 7.32 | 8.95  | 6.26 | 6.13 | 6.94  | 5.02 | 6.26 |
| 34 | 8.5   | 8.24 | 8.73 | 10.91 | 6.99 | 5.51 | 5.4   | 5.28 | 6.95 |
| 35 | 7.88  | 6.74 | 6.01 | 5.41  | 7.32 | 7.42 | 6.54  | 6.86 | 7.43 |
| 36 | 8.03  | 6.79 | 6.06 | 5.61  | 6.98 | 6.42 | 6.48  | 6.98 | 7.38 |
| 37 | 7.94  | 6.52 | 5.74 | 4.8   | 6.83 | 6.61 | 6.38  | 6.62 | 6.86 |
| 38 | 7.65  | 6.29 | 7.13 | 6.75  | 8.3  | 8.1  | 6.61  | 7.57 | 7.98 |
| 39 | 8.3   | 6.83 | 5.86 | 5.04  | 7.31 | 7.48 | 6.24  | 6.66 | 7.01 |
| 40 | 8     | 6.77 | 5.96 | 5.27  | 6.83 | 6.52 | 6.05  | 6.59 | 6.96 |
| 41 | 8.13  | 7.06 | 6.01 | 5.74  | 7.04 | 6.72 | 6.01  | 6.74 | 6.88 |
| 42 | 7.41  | 3.41 | 7.9  | 8.14  | 8.87 | 9.17 | 6.22  | 7    | 9.24 |
| 43 | 8.36  | 7.85 | 6.78 | 6.3   | 8.03 | 8.1  | 6.55  | 7.67 | 8.02 |
| 44 | 8.37  | 7.91 | 6.93 | 6.69  | 8.49 | 8.34 | 6.37  | 8.18 | 8.24 |
| 45 | 9.02  | 8.2  | 5.82 | 5.12  | 7.36 | 7.79 | 6.54  | 6.84 | 7.44 |
| 46 | 8.37  | 7.81 | 6.79 | 6.38  | 8.12 | 8    | 6.61  | 7.74 | 8.03 |
| 47 | 8.78  | 7.83 | 6.46 | 7.56  | 7.67 | 7.9  | 7.17  | 6.91 | 7.56 |
| 48 | 8.8   | 7.75 | 6.74 | 6.23  | 8.03 | 8.21 | 7.61  | 7.05 | 8.01 |
| 49 | 9     | 7.31 | 7.08 | 6.03  | 8.13 | 7.73 | 6.13  | 7.32 | 8.21 |
| 50 | 8.59  | 7.56 | 7.39 | 7.16  | 8.73 | 8.64 | 7.05  | 7.94 | 8.44 |
| 51 | 8.98  | 8.16 | 5.08 | 7.79  | 6.72 | 7.18 | 6.67  | 6.87 | 7.37 |
| 52 | 9.59  | 8.22 | 4.83 | 9.24  | 7.23 | 7.25 | 6.12  | 6.47 | 6.65 |
| 53 | 9.45  | 8.19 | 5.53 | 8.9   | 7.21 | 7.68 | 6.71  | 6.88 | 6.53 |

1  
2  
3  
4  
5  
6  
7  
8  
9  
10  
11  
12  
13  
14  
15  
16  
17  
18  
19  
20  
21  
22  
23  
24  
25  
26  
27  
28  
29  
30  
31  
32  
33  
34  
35  
36  
37  
38  
39  
40  
41  
42  
43  
44  
45  
46  
47  
48  
49  
50  
51  
52  
53  
54  
55  
56  
57  
58  
59  
60

|       |      |      |       |      |      |       |      |      |
|-------|------|------|-------|------|------|-------|------|------|
| 9.26  | 8.3  | 5.66 | 9.16  | 7.44 | 7.92 | 5.85  | 7.18 | 7.1  |
| 9.25  | 9.59 | 5.91 | 9.5   | 7.67 | 7.91 | 7.45  | 6.78 | 7.98 |
| 9.28  | 9.35 | 5.48 | 9.04  | 7.94 | 8.26 | 7.65  | 6.63 | 7.95 |
| 9.51  | 9.45 | 4.83 | 8.67  | 7.5  | 7.76 | 7.65  | 6.39 | 8.54 |
| 9.26  | 9.39 | 5.06 | 8.48  | 7.5  | 7.54 | 7.5   | 6.67 | 8.28 |
| 9.39  | 9.18 | 7.16 | 7.85  | 8.21 | 8.35 | 6.26  | 6.84 | 7.7  |
| 10.55 | 9.32 | 8.15 | 8.84  | 7.81 | 8.21 | 6.97  | 6.57 | 7.2  |
| 10.28 | 9.29 | 7.58 | 7.81  | 7.82 | 8.24 | 5.93  | 6.64 | 7.89 |
| 10.24 | 9.57 | 8.75 | 10.06 | 8.24 | 7.62 | 7.41  | 6.5  | 7.5  |
| 10.41 | 8.85 | 6.81 | 7.79  | 7.79 | 7.62 | 8.28  | 8.03 | 7.07 |
| 10.33 | 9.36 | 6.36 | 9.33  | 8.52 | 8.19 | 7.76  | 6.96 | 7.23 |
| 10.29 | 9.5  | 5.29 | 9.25  | 8.28 | 8.46 | 7.68  | 7.06 | 6.79 |
| 10.22 | 9.32 | 6.09 | 8.97  | 7.72 | 8.34 | 8.15  | 6.99 | 6.93 |
| 8.79  | 8.61 | 4.56 | 5.21  | 7.35 | 7.82 | 5.99  | 6.64 | 7.25 |
| 9.29  | 8.91 | 4.09 | 7.16  | 7.5  | 7.99 | 6.79  | 6.77 | 7.02 |
| 9.35  | 8.47 | 6.99 | 8.9   | 7.5  | 7.28 | 7.21  | 6.82 | 7.19 |
| 9.24  | 9.44 | 7.35 | 9.97  | 8.38 | 7.9  | 6.76  | 5.52 | 7.34 |
| 9.41  | 9.07 | 4.13 | 9.48  | 6.97 | 7.9  | 8.13  | 6.25 | 6.8  |
| 9.18  | 9.18 | 6.93 | 10.94 | 7.68 | 7.12 | 7.07  | 6.5  | 7.19 |
| 9.45  | 9.26 | 6.86 | 9.47  | 7.29 | 7.61 | 7.44  | 4.79 | 7.28 |
| 9.77  | 9.02 | 1.54 | 7.88  | 7.12 | 8.45 | 7.28  | 5.52 | 6.39 |
| 9.58  | 8.82 | 1.48 | 5.78  | 6.08 | 8.22 | 7.73  | 4.84 | 6.65 |
| 8.89  | 8.09 | 6.96 | 8.32  | 7.5  | 7.06 | 7.23  | 7.04 | 6.89 |
| 8.83  | 8.18 | 6.39 | 7.53  | 7.68 | 7.3  | 7.1   | 7.12 | 6.6  |
| 9.72  | 8.61 | 8.74 | 8.54  | 7.15 | 7.54 | 9.79  | 7.32 | 6.15 |
| 8.67  | 8.55 | 3.68 | 4.95  | 6.74 | 5.85 | 5.61  | 3.53 | 5.57 |
| 8.48  | 8.17 | 6.11 | 7.69  | 6.92 | 6.72 | 5.55  | 4.79 | 6.08 |
| 8.67  | 8.36 | 4.29 | 6.6   | 6.97 | 6.22 | 5.41  | 3.57 | 6.21 |
| 8.13  | 8.85 | 7.42 | 7.36  | 7.22 | 5.36 | 3.9   | 1.9  | 7.68 |
| 8.33  | 7.01 | 5.76 | 5.22  | 7.01 | 7.37 | 5.22  | 6.89 | 7.12 |
| 8.51  | 7.21 | 5.97 | 5.3   | 6.87 | 7.36 | 5.36  | 6.36 | 6.89 |
| 8.39  | 7.17 | 6.09 | 5.47  | 7.28 | 7.15 | 5.05  | 6.47 | 7.39 |
| 8.19  | 7.2  | 5.76 | 5.28  | 6.89 | 7.22 | 5.91  | 6.54 | 7.04 |
| 7.86  | 7.76 | 5.55 | 4.45  | 6.61 | 6.15 | 5.91  | 5.68 | 6.18 |
| 7.38  | 7.63 | 5.39 | 5.64  | 7.07 | 6.46 | 5.95  | 5.77 | 6.37 |
| 7.36  | 7.51 | 5.52 | 7.09  | 6.94 | 6.03 | 5.67  | 6    | 6.52 |
| 7.64  | 7.35 | 6.03 | 9.56  | 6.99 | 6.24 | 5.34  | 5.71 | 6.37 |
| 9.94  | 9.64 | 5.11 | 7.65  | 8.5  | 7.54 | 6.16  | 4.16 | 7.2  |
| 9.4   | 8.48 | 5.99 | 6.89  | 7.82 | 7.51 | 7.02  | 6.16 | 7.57 |
| 9.89  | 9.14 | 3.23 | 4.23  | 7.41 | 7.65 | 7.67  | 5.55 | 6.94 |
| 10.76 | 8.96 | 5.55 | 5.4   | 6.32 | 7.19 | 10.05 | 5.93 | 5.82 |
| 9.35  | 8.85 | 5.39 | 6.77  | 6.94 | 7.47 | 6.64  | 6.19 | 7.23 |
| 10.34 | 9.03 | 6.1  | 6.1   | 6.51 | 6.83 | 10.21 | 6.1  | 6.51 |
| 9.86  | 8.89 | 6.02 | 9.85  | 7.37 | 7.52 | 6.64  | 6.04 | 6.73 |
| 9.53  | 9.03 | 5.72 | 11.04 | 7.28 | 7.3  | 6.52  | 6.38 | 6.81 |
| 9.47  | 8.82 | 2.27 | 0.68  | 6.11 | 7.48 | 7.4   | 5.27 | 6.66 |
| 9.52  | 8.54 | 5.84 | 7.98  | 7.35 | 7.37 | 7.31  | 5.94 | 6.8  |
| 9.65  | 8.66 | 6.36 | 8.59  | 6.93 | 7.44 | 7.06  | 5.18 | 6.3  |
| 9.33  | 8.48 | 6.21 | 8.13  | 7.5  | 7.49 | 6.47  | 6.16 | 6.7  |
| 8.83  | 8.02 | 8.2  | 6.1   | 7.03 | 7.39 | 6.72  | 4.86 | 6.82 |
| 8.07  | 7.83 | 6.48 | 8.7   | 6.59 | 7.41 | 6.05  | 5.43 | 6.92 |
| 8.23  | 7.78 | 5.98 | 8.18  | 6.55 | 7.17 | 6.23  | 5.36 | 6.49 |

<https://mc.manuscriptcentral.com/gut>

1  
2  
3  
4  
5  
6  
7  
8  
9  
10  
11  
12  
13  
14  
15  
16  
17  
18  
19  
20  
21  
22  
23  
24  
25  
26  
27  
28  
29  
30  
31  
32  
33  
34  
35  
36  
37  
38  
39  
40  
41  
42  
43  
44  
45  
46  
47  
48  
49  
50  
51  
52  
53  
54  
55  
56  
57  
58  
59  
60

|       |      |      |       |      |      |       |      |      |
|-------|------|------|-------|------|------|-------|------|------|
| 8.79  | 8.21 | 6.37 | 7.72  | 5.92 | 7.15 | 7.23  | 5.25 | 6.54 |
| 8.43  | 7.87 | 7.51 | 7.03  | 7.01 | 6.71 | 6.53  | 5.85 | 6.1  |
| 8.49  | 7.73 | 4.83 | 5.91  | 6.98 | 6.37 | 5.72  | 5.94 | 6.56 |
| 8.92  | 8.11 | 2.49 | 5.35  | 6.79 | 6.42 | 5.53  | 5.57 | 7.04 |
| 7.78  | 6.88 | 5.55 | 5.25  | 7.25 | 7.11 | 7.11  | 7.23 | 6.95 |
| 9.4   | 8.3  | 5.85 | 9.35  | 7.03 | 6.9  | 6.24  | 4.02 | 6.13 |
| 9.13  | 8.08 | 2.53 | 6.11  | 6.28 | 6.87 | 7.19  | 3.77 | 6.04 |
| 9.23  | 8.08 | 2.94 | 5.56  | 5.97 | 6.67 | 7.51  | 3.74 | 6.02 |
| 7.38  | 6.87 | 6.27 | 5.13  | 7.6  | 7.4  | 6.4   | 7.27 | 7.35 |
| 8.19  | 7.97 | 5.66 | 7.22  | 7.23 | 7.12 | 6.26  | 6.38 | 7.08 |
| 9.05  | 8.6  | 8.4  | 7.97  | 7.27 | 7.07 | 6.73  | 4.78 | 6.85 |
| 8.73  | 8.22 | 6.17 | 7.88  | 7.3  | 7.17 | 6.02  | 5.59 | 6.7  |
| 8.84  | 8.63 | 6.68 | 7.65  | 7.03 | 7.2  | 7.23  | 5.47 | 6.68 |
| 8.66  | 8.28 | 9.07 | 10.95 | 7.56 | 6.73 | 6.32  | 5.3  | 6.96 |
| 10.56 | 8.07 | 2.54 | 5.13  | 5.71 | 6.45 | 10.24 | 5.13 | 7.5  |
| 9.12  | 8.36 | 4.97 | 6.24  | 6.56 | 6.35 | 5.68  | 4.93 | 6.19 |
| 8.42  | 8.04 | 6.14 | 6.91  | 6.88 | 7.1  | 5.36  | 5.59 | 6.89 |
| 9.11  | 8.4  | 4.71 | 6.06  | 6.02 | 6.55 | 6     | 4.71 | 5.98 |

1  
2  
3  
4  
5  
6  
7  
8  
9  
10  
11  
12  
13  
14  
15  
16  
17  
18  
19  
20  
21  
22  
23  
24  
25  
26  
27  
28  
29  
30  
31  
32  
33  
34  
35  
36  
37  
38  
39  
40  
41  
42  
43  
44  
45  
46  
47  
48  
49  
50  
51  
52  
53  
54  
55  
56  
57  
58  
59  
60

| SKP1  | SLC12A6 | SLC2A1 | SLC35A3 | SLC37A1 | SLC44A4 | SLIT2 | SLPI  | SMAD1 |
|-------|---------|--------|---------|---------|---------|-------|-------|-------|
| 10.4  | 6.57    | 5.99   | 6.56    | 6.8     | 8.28    | 5.08  | 8.03  | 7.53  |
| 10.65 | 6.33    | 7.1    | 8.09    | 7.61    | 8.56    | 3.74  | 10.54 | 7.86  |
| 10.76 | 6.64    | 7.36   | 7.78    | 7.2     | 7.95    | 3.54  | 11.59 | 7.95  |
| 11.41 | 6.54    | 6.48   | 7.87    | 6.69    | 8.91    | 5.46  | 10.42 | 8.34  |
| 9.49  | 7.65    | 6.22   | 1.01    | 8.18    | 10.03   | 2.01  | 8.64  | 7.74  |
| 10.43 | 6.75    | 5.87   | 7.38    | 6.81    | 9.05    | 3.95  | 9.72  | 7.39  |
| 10.55 | 6.75    | 6.03   | 7.44    | 6.76    | 9.29    | 3.83  | 9.9   | 7.67  |
| 11.25 | 5.68    | 6.8    | 7.46    | 6.07    | 11.43   | 5.39  | 11.2  | 7.45  |
| 10.92 | 6.34    | 5.12   | 8.1     | 7.09    | 10.03   | 5.54  | 7.2   | 7.35  |
| 10.54 | 5.98    | 7      | 8.35    | 7.47    | 8.94    | 4.61  | 8.36  | 8.1   |
| 11.15 | 6.11    | 5.7    | 9.26    | 7.58    | 9.65    | 4.63  | 8.66  | 8.14  |
| 11.19 | 5.64    | 6.41   | 8.49    | 6.87    | 9.7     | 5.73  | 8.82  | 8.52  |
| 11.38 | 6.69    | 6.37   | 8.47    | 7.28    | 5.99    | 4.27  | 8.2   | 7.83  |
| 11.13 | 6.71    | 6.78   | 8.01    | 7.36    | 4.88    | 4.67  | 8.13  | 8.16  |
| 11.32 | 4.94    | 6.52   | 5.58    | 6.02    | 6.09    | 6.23  | 9.29  | 7.32  |
| 10.58 | 6.9     | 7.01   | 7.89    | 7.03    | 8.44    | 4.94  | 9.34  | 8.18  |
| 11.07 | 6.96    | 7.87   | 8.47    | 7.38    | 8.62    | 5.38  | 10.4  | 8.16  |
| 10.85 | 6.89    | 8.48   | 8.29    | 7.48    | 8.77    | 5.46  | 10.7  | 7.86  |
| 11.64 | 6.68    | 5.51   | 7.44    | 6.54    | 6.97    | 5.76  | 10.07 | 8.1   |
| 11.72 | 6.89    | 5.31   | 8.66    | 7.39    | 7.33    | 5.31  | 10    | 8.21  |
| 11.68 | 6.91    | 5.11   | 7.83    | 6.69    | 4.63    | 6.38  | 9.02  | 8.29  |
| 11.86 | 6.4     | 6.08   | 9.02    | 7.4     | 8.76    | 5.15  | 11.43 | 8.04  |
| 11.91 | 6.67    | 6.08   | 9.2     | 7.35    | 8.71    | 5.45  | 11.82 | 7.97  |
| 11.93 | 6.51    | 6.22   | 9.04    | 7.02    | 8.58    | 6.52  | 11.36 | 7.77  |
| 10.81 | 5.47    | 7.44   | 7.37    | 4.01    | 5.56    | 4.67  | 2.75  | 7.17  |
| 11.52 | 6.08    | 6.92   | 9.44    | 8.18    | 9.18    | 3.3   | 10.9  | 7.54  |
| 11.47 | 6.54    | 6.75   | 9.3     | 7.65    | 9.15    | 3.33  | 10.82 | 7.59  |
| 11.04 | 6.87    | 6.45   | 8.87    | 7.79    | 8.82    | 3.72  | 10.5  | 7.7   |
| 10.74 | 6.38    | 7.33   | 7.6     | 7.14    | 8.67    | 3.02  | 8.37  | 7.87  |
| 10.66 | 6.53    | 6.13   | 7.95    | 7.5     | 9.52    | 5.09  | 9.91  | 7.52  |
| 10.91 | 6.22    | 7.05   | 7.61    | 7.48    | 9.14    | 3.2   | 9.19  | 7.68  |
| 10.38 | 6.64    | 6.73   | 6.73    | 7.59    | 9.13    | 2.29  | 9.48  | 7.75  |
| 10.41 | 7.86    | 5.88   | 6.3     | 7.4     | 1.35    | 4.56  | 6.11  | 7.99  |
| 11.62 | 6.38    | 5.79   | 8.14    | 6.55    | 9.88    | 6.58  | 10.52 | 7.72  |
| 11.71 | 6.3     | 6.02   | 8.59    | 6.54    | 10.25   | 4.74  | 11.43 | 7.72  |
| 11.64 | 6.28    | 4.56   | 7.99    | 6.51    | 10.37   | 6.64  | 11.25 | 7.85  |
| 10.8  | 6.38    | 4.84   | 7.2     | 6.23    | 8.18    | 3.62  | 6.87  | 7.68  |
| 10.97 | 6.82    | 5.16   | 8.17    | 7.22    | 7.69    | 3.73  | 6.88  | 7.64  |
| 10.75 | 6.41    | 5.07   | 7.16    | 6.01    | 5.83    | 4.54  | 7.94  | 7.54  |
| 10.76 | 6.61    | 4.83   | 7.04    | 6.17    | 6.71    | 4.87  | 6.25  | 7.48  |
| 9.96  | 6.65    | 6.21   | 7.25    | 6.28    | 7.97    | 3.83  | 9.49  | 7.19  |
| 10.04 | 6.16    | 6.44   | 7.37    | 6.29    | 7.85    | 3.9   | 9.52  | 7.12  |
| 9.87  | 6.12    | 5.64   | 7.11    | 6.33    | 7.9     | 3.8   | 9.53  | 7.03  |
| 10.32 | 6.26    | 6.17   | 8.14    | 6.02    | 8.61    | 3.4   | 10.09 | 6.44  |
| 10.26 | 2.86    | 7.25   | 6.56    | 2.86    | 10.66   | 2.86  | 10.93 | 7.56  |
| 10.69 | 5.9     | 4.77   | 8.62    | 7.11    | 10.05   | 5.12  | 7.35  | 7.33  |
| 10.81 | 5.7     | 5.13   | 8.29    | 6.54    | 9.61    | 5.78  | 7.27  | 7.71  |
| 10.88 | 6.06    | 4.67   | 7.88    | 6.11    | 8.74    | 7.06  | 6.71  | 7.84  |
| 11.65 | 6.78    | 9.03   | 9.04    | 6.47    | 8.98    | 5.72  | 8.38  | 8.79  |
| 11.81 | 6.67    | 8.55   | 8.89    | 6.72    | 8.29    | 5.53  | 7.49  | 9.1   |
| 12.33 | 6.89    | 7.15   | 8.97    | 6.94    | 8.4     | 4.3   | 6.87  | 9.11  |

<https://mc.manuscriptcentral.com/gut>



|    |       |      |      |       |       |       |      |       |      |
|----|-------|------|------|-------|-------|-------|------|-------|------|
| 1  |       |      |      |       |       |       |      |       |      |
| 2  | 12.04 | 6.86 | 8.35 | 8.74  | 6.81  | 8.03  | 6.72 | 7.21  | 8.89 |
| 3  | 11.24 | 6.01 | 9.27 | 8.96  | 7.29  | 7.81  | 4.42 | 10.7  | 7.5  |
| 4  | 11.48 | 6.26 | 8.18 | 8.89  | 7.7   | 7.13  | 3.19 | 8.99  | 8.47 |
| 5  | 11.52 | 6.28 | 8.56 | 8.76  | 7.7   | 7.36  | 2.95 | 9.54  | 8.18 |
| 6  | 11.49 | 6.41 | 8.4  | 8.68  | 7.59  | 6.89  | 5.25 | 9.04  | 8.2  |
| 7  |       |      |      |       |       |       |      |       |      |
| 8  | 11.25 | 7.11 | 5.93 | 9.65  | 7.52  | 8.17  | 4.98 | 6.4   | 8.14 |
| 9  | 11.91 | 6.89 | 6.38 | 9.48  | 7.21  | 8.41  | 4.05 | 8.9   | 7.98 |
| 10 | 11.78 | 6.85 | 6.33 | 10.17 | 6.98  | 8.46  | 3.86 | 9.37  | 7.76 |
| 11 | 11.86 | 7.01 | 5.61 | 9.46  | 7.25  | 8.14  | 5.65 | 9.32  | 7.71 |
| 12 | 10.96 | 6.66 | 6.7  | 7.94  | 6.88  | 7.73  | 4.94 | 8.13  | 7.12 |
| 13 | 10.8  | 6.71 | 5.45 | 8.1   | 7     | 9.08  | 4.79 | 10.3  | 7.79 |
| 14 |       |      |      |       |       |       |      |       |      |
| 15 | 10.71 | 6.31 | 5.46 | 8.19  | 6.8   | 9.02  | 4.52 | 9.94  | 7.72 |
| 16 | 10.67 | 6.8  | 5.53 | 8.04  | 6.47  | 8.64  | 5.5  | 9.33  | 7.54 |
| 17 | 9.15  | 7.15 | 7.47 | 7.15  | 8.15  | 9.67  | 6.15 | 8.61  | 7.47 |
| 18 | 11.25 | 7.58 | 9.27 | 7     | 8.83  | 8.4   | 2.37 | 9.4   | 7.79 |
| 19 |       |      |      |       |       |       |      |       |      |
| 20 | 10.88 | 7.29 | 8.68 | 7.53  | 7.91  | 6.41  | 3.52 | 8.55  | 7.8  |
| 21 | 10.4  | 8.74 | 8.23 | 0.24  | 10.07 | 2.24  | 2.83 | 8.33  | 7.95 |
| 22 | 10.14 | 8.27 | 8.03 | 0.77  | 9.82  | 6.66  | 2.36 | 8.92  | 7.9  |
| 23 | 11.66 | 6.44 | 6.88 | 9.1   | 6.89  | 7.69  | 2.46 | 9.03  | 8.2  |
| 24 | 11.81 | 6.59 | 7.22 | 9.64  | 7.4   | 7.91  | 2.26 | 9.98  | 8.2  |
| 25 | 11.62 | 6.51 | 6.61 | 8.86  | 7.26  | 7.69  | 2.84 | 9.21  | 8.2  |
| 26 | 11.92 | 6.98 | 7.08 | 9.69  | 6.97  | 8.56  | 6.63 | 12.27 | 8.3  |
| 27 | 11.91 | 6.75 | 6.51 | 9.72  | 6.94  | 9.1   | 6.72 | 12.02 | 8.4  |
| 28 |       |      |      |       |       |       |      |       |      |
| 29 | 11.93 | 6.83 | 6.37 | 8.77  | 6.75  | 7.2   | 7.51 | 11.43 | 8.27 |
| 30 | 12.15 | 7.31 | 6.88 | 9.38  | 8.04  | 9.93  | 5.68 | 12.19 | 8.8  |
| 31 | 12.28 | 7.47 | 6.66 | 9.09  | 7.71  | 9.81  | 5.47 | 12.25 | 8.94 |
| 32 | 12.3  | 7.4  | 7.4  | 9.15  | 7.5   | 9.67  | 5.55 | 12.48 | 9.03 |
| 33 | 11.62 | 6.77 | 7.56 | 8.32  | 7.34  | 6.63  | 4.27 | 8.25  | 7.88 |
| 34 | 11.61 | 6.58 | 7.89 | 8.05  | 7.24  | 5.47  | 4.62 | 8.04  | 7.98 |
| 35 | 11.48 | 6.64 | 7.79 | 7.94  | 7.12  | 6.13  | 5.28 | 8.51  | 7.72 |
| 36 |       |      |      |       |       |       |      |       |      |
| 37 | 11.41 | 7.38 | 6.73 | 8.91  | 7.7   | 8.26  | 5.61 | 9.28  | 8.55 |
| 38 | 11.28 | 6.97 | 6.66 | 9.44  | 8     | 8.79  | 2.78 | 9.74  | 8.29 |
| 39 | 11.23 | 7.23 | 6.61 | 9.14  | 7.91  | 9.32  | 2.99 | 9.87  | 8.4  |
| 40 | 10.98 | 6.95 | 8.94 | 7.26  | 6.77  | 7.32  | 5.19 | 9.7   | 8.29 |
| 41 | 10.97 | 6.84 | 8.43 | 7.54  | 7.13  | 8.35  | 4.13 | 10.31 | 8.25 |
| 42 | 11.06 | 7.03 | 8.91 | 7.19  | 7.11  | 6.73  | 5.92 | 9.71  | 8.1  |
| 43 | 10.58 | 7.18 | 6.9  | 6.63  | 7.45  | 7.39  | 6.27 | 9.99  | 8.18 |
| 44 | 10.58 | 7.18 | 6.9  | 6.63  | 7.45  | 7.39  | 6.27 | 9.99  | 8.18 |
| 45 | 11.2  | 6.73 | 8.21 | 7.61  | 7.87  | 9.11  | 5.88 | 11.85 | 8.07 |
| 46 | 11.12 | 7.05 | 7.8  | 7.96  | 7.55  | 8.54  | 6.18 | 11.26 | 8.29 |
| 47 |       |      |      |       |       |       |      |       |      |
| 48 | 11.14 | 7.32 | 8.2  | 7.57  | 7.71  | 8.17  | 7.32 | 11.34 | 8.09 |
| 49 | 10.05 | 7.52 | 6.74 | 4.36  | 7.44  | 6.11  | 3.73 | 8.36  | 8.19 |
| 50 | 10.79 | 7.13 | 6.41 | 6.43  | 7.53  | 7.53  | 5.34 | 10.88 | 7.78 |
| 51 | 10.91 | 6.74 | 6.34 | 7.94  | 7.66  | 8.4   | 4.34 | 11.89 | 8.09 |
| 52 | 10.64 | 6.99 | 6.23 | 6.74  | 7.44  | 7.88  | 6.31 | 10.35 | 8.1  |
| 53 | 12.2  | 6.22 | 6.15 | 9.4   | 7.17  | 9.32  | 5.96 | 8.38  | 8.44 |
| 54 | 11.96 | 5.63 | 7.85 | 9.57  | 7.03  | 9.56  | 3.66 | 8.93  | 8.33 |
| 55 |       |      |      |       |       |       |      |       |      |
| 56 | 12.11 | 5.87 | 6.4  | 8.59  | 6.96  | 10.32 | 4.6  | 9.78  | 8.22 |
| 57 | 10.18 | 7.44 | 6.58 | 6.32  | 7.37  | 5.71  | 5.86 | 8.29  | 7.94 |
| 58 | 10.77 | 7.12 | 6.49 | 6.85  | 7.05  | 6.47  | 6.63 | 9     | 8.09 |
| 59 | 10.75 | 7.11 | 6.65 | 6.76  | 7.18  | 6.01  | 6.5  | 8.7   | 7.89 |
| 60 | 10.69 | 6.23 | 6.3  | 7.06  | 7.36  | 8.48  | 3.98 | 9.95  | 8.14 |

<https://mc.manuscriptcentral.com/gut>

1  
2  
3  
4  
5  
6  
7  
8  
9  
10  
11  
12  
13  
14  
15  
16  
17  
18  
19  
20  
21  
22  
23  
24  
25  
26  
27  
28  
29  
30  
31  
32  
33  
34  
35  
36  
37  
38  
39  
40  
41  
42  
43  
44  
45  
46  
47  
48  
49  
50  
51  
52  
53  
54  
55  
56  
57  
58  
59  
60

|       |      |      |      |       |       |      |       |      |
|-------|------|------|------|-------|-------|------|-------|------|
| 10.9  | 6.23 | 6.87 | 7.3  | 7.51  | 8.55  | 3.7  | 9.93  | 8.14 |
| 10.31 | 7.18 | 7.08 | 5.14 | 7.84  | 8.68  | 4.59 | 9.12  | 7.79 |
| 10.83 | 7.03 | 6.43 | 7.39 | 7.19  | 8.09  | 6.32 | 9.46  | 7.71 |
| 11.5  | 7.83 | 8.16 | 8.42 | 7.63  | 8.16  | 6.21 | 12.26 | 8.57 |
| 11.31 | 7.26 | 6.32 | 8.02 | 7.67  | 8.32  | 7.26 | 11.46 | 8.16 |
| 11.35 | 6.08 | 6.75 | 7.47 | 6.58  | 8.67  | 6.16 | 6.87  | 7.87 |
| 11.22 | 5.92 | 7.64 | 10   | 7.06  | 9     | 4.13 | 7.61  | 7.51 |
| 11.39 | 6.37 | 7.73 | 9.62 | 6.3   | 8.43  | 4.61 | 6.71  | 8.07 |
| 11.92 | 3.49 | 8.52 | 8.02 | 4.08  | 11.98 | 5.49 | 8.25  | 8.56 |
| 11.07 | 6.08 | 4.96 | 7.68 | 7.46  | 10.33 | 5.04 | 8.3   | 8.39 |
| 11.05 | 5.4  | 6.01 | 8.86 | 6.58  | 10.36 | 3.81 | 7.96  | 8.35 |
| 10.38 | 5.75 | 6.54 | 8.23 | 6.62  | 8.79  | 2.21 | 8.43  | 8.02 |
| 11.35 | 5.07 | 7.35 | 7.58 | 4.85  | 12.7  | 5.26 | 9.03  | 8.65 |
| 9.04  | 7.26 | 7.31 | 1.52 | 8.56  | 3.96  | 0    | 9.5   | 7.58 |
| 11.14 | 6.19 | 7.84 | 8.71 | 6.17  | 7.24  | 3.65 | 11.66 | 7.52 |
| 11.21 | 6.28 | 7.97 | 9.1  | 6.67  | 7.26  | 3.64 | 11.76 | 7.68 |
| 11.11 | 5.98 | 7.9  | 9.03 | 6.23  | 7.36  | 4.33 | 11.55 | 7.4  |
| 11.18 | 7.07 | 7.86 | 8.28 | 7.14  | 6.97  | 3.83 | 8.23  | 8.1  |
| 10.52 | 6.8  | 7.88 | 7.16 | 7     | 3.81  | 3.9  | 6.93  | 7.32 |
| 10.98 | 6.74 | 7.98 | 7.69 | 6.97  | 3.72  | 4.44 | 6.68  | 7.55 |
| 9.33  | 6.16 | 5.16 | 5.16 | 6.16  | 16.69 | 6.75 | 11.82 | 7.75 |
| 10.81 | 5.53 | 6.9  | 8.57 | 7.58  | 9.93  | 3.22 | 10.17 | 7.66 |
| 10.98 | 6.64 | 6.73 | 8.16 | 7.04  | 9.93  | 4.99 | 9.73  | 7.65 |
| 11.1  | 4.77 | 6.27 | 8.26 | 5.88  | 10.45 | 5.57 | 13.97 | 7.61 |
| 11.06 | 4.91 | 6.26 | 7.28 | 5.76  | 10.73 | 5.76 | 14.28 | 7.78 |
| 11.12 | 5.71 | 6    | 7.42 | 5.83  | 8.35  | 7.68 | 13.31 | 7.68 |
| 9.09  | 6.75 | 6.55 | 4    | 7.5   | 7.02  | 2.58 | 8.76  | 8.12 |
| 9.03  | 6.81 | 6.76 | 2.44 | 8.02  | 3.18  | 0.86 | 8.27  | 8.22 |
| 8.93  | 6.72 | 6.57 | 2.77 | 7.52  | 4.09  | 2.77 | 8.05  | 8.09 |
| 10.4  | 5.96 | 5.53 | 7.62 | 5.37  | 7.3   | 6.87 | 8.33  | 6.79 |
| 10.92 | 5.78 | 4.05 | 7.06 | 4.11  | 6.45  | 7.11 | 6.72  | 7.28 |
| 10.58 | 5.2  | 4.92 | 7.35 | 5.92  | 8.54  | 5.54 | 8.58  | 7.06 |
| 10.58 | 6.16 | 4.96 | 6.91 | 5.11  | 5.8   | 7.79 | 6.92  | 6.99 |
| 8.5   | 6.77 | 6.26 | 2.04 | 7.52  | 6.91  | 0.45 | 7.22  | 7.25 |
| 8.57  | 5.71 | 5.78 | 3.06 | 6.42  | 6.27  | 0.25 | 7.77  | 7.4  |
| 8.74  | 5.47 | 5.68 | 4.59 | 6.46  | 6.79  | 1.34 | 7.67  | 6.89 |
| 8.96  | 7.29 | 6.54 | 0    | 8.25  | 0     | 0    | 7.27  | 7.16 |
| 8.52  | 6.62 | 5.73 | 2.92 | 7.19  | 3.66  | 1.34 | 7.31  | 7.31 |
| 8.31  | 6.71 | 4.42 | 2.1  | 6.8   | 5.27  | 2.1  | 7.38  | 7.49 |
| 8.42  | 6.58 | 5.89 | 3.31 | 7.09  | 5.74  | 0.31 | 7.38  | 7.59 |
| 8.62  | 9.01 | 8.14 | 2.41 | 10.07 | 2.41  | 2.41 | 7.17  | 6.8  |
| 9.3   | 7.36 | 6.78 | 3.86 | 7.84  | 5.45  | 1.06 | 8.23  | 8.3  |
| 9.42  | 7.68 | 7.26 | 0.33 | 8.28  | 3.79  | 0    | 8.88  | 8.54 |
| 9.78  | 6.57 | 6.12 | 7    | 7.53  | 8.33  | 3.19 | 9.31  | 7.51 |
| 9.23  | 7.44 | 6.79 | 3.92 | 7.9   | 6.09  | 1.33 | 8.43  | 7.98 |
| 9.32  | 7.07 | 6.31 | 5.03 | 7.44  | 7.6   | 4.62 | 8.85  | 7.63 |
| 9.13  | 7.7  | 7.13 | 2.88 | 8.09  | 7.62  | 1.88 | 8.97  | 7.75 |
| 9.26  | 7.66 | 7.21 | 1.71 | 7.9   | 4.29  | 0.71 | 8.08  | 8.06 |
| 9.64  | 8.22 | 7.25 | 3.07 | 8.6   | 5.22  | 2.48 | 7.9   | 7.8  |
| 10.24 | 6.43 | 6.56 | 8.12 | 6.99  | 6.45  | 4.37 | 7.67  | 7.64 |
| 10.39 | 6.47 | 5.91 | 8.22 | 7.2   | 6.84  | 3.99 | 7.96  | 7.84 |
| 10.3  | 6.53 | 6.06 | 8.13 | 7.36  | 6.17  | 4.36 | 8.18  | 7.78 |

<https://mc.manuscriptcentral.com/gut>

1  
2  
3  
4  
5  
6  
7  
8  
9  
10  
11  
12  
13  
14  
15  
16  
17  
18  
19  
20  
21  
22  
23  
24  
25  
26  
27  
28  
29  
30  
31  
32  
33  
34  
35  
36  
37  
38  
39  
40  
41  
42  
43  
44  
45  
46  
47  
48  
49  
50  
51  
52  
53  
54  
55  
56  
57  
58  
59  
60

|       |      |      |      |      |       |      |       |      |
|-------|------|------|------|------|-------|------|-------|------|
| 10.38 | 6.84 | 6    | 8.17 | 6.93 | 5.88  | 4.52 | 7.96  | 7.82 |
| 12.19 | 7.95 | 7.45 | 9.3  | 7.57 | 10.06 | 6.22 | 12.92 | 8.12 |
| 12.07 | 7.85 | 7.18 | 9.18 | 7.87 | 9.88  | 4.3  | 12.1  | 8.45 |
| 12.12 | 7.55 | 6.47 | 8.87 | 7.34 | 10.26 | 4.65 | 12.39 | 8.23 |
| 12.14 | 7.6  | 6.56 | 9.09 | 7.08 | 10.24 | 4.12 | 12.59 | 8.07 |
| 11.16 | 7.36 | 7.44 | 7.42 | 7.64 | 7.26  | 6.32 | 11.78 | 7.79 |
| 12.03 | 5.93 | 7.16 | 8.75 | 8.5  | 9.66  | 5.65 | 12.45 | 8.24 |
| 11.9  | 6.23 | 7.42 | 8.93 | 8.65 | 9.34  | 5.15 | 12.39 | 8.27 |
| 12    | 5.95 | 6.87 | 8.02 | 8.08 | 9.2   | 7.54 | 11.33 | 8.13 |
| 11.7  | 6.62 | 9.31 | 8.39 | 8.41 | 11.04 | 6.16 | 11.5  | 8.16 |
| 11.54 | 7.07 | 7.88 | 8.55 | 7.42 | 9.69  | 6.34 | 10.65 | 8.37 |
| 11.56 | 6.92 | 7.77 | 8.56 | 7.75 | 9.92  | 6.09 | 11.06 | 8.4  |
| 11.55 | 6.49 | 8.5  | 9.19 | 7.53 | 10.18 | 6.29 | 10.81 | 8.5  |
| 10.83 | 6.55 | 7.18 | 8.33 | 7.87 | 9.34  | 5.69 | 12.87 | 7.67 |
| 11.27 | 6.59 | 7.43 | 8.75 | 7.99 | 9.71  | 4.79 | 13.72 | 7.91 |
| 11.23 | 5.73 | 6.72 | 6.83 | 6.67 | 9.28  | 6.59 | 11.93 | 7.85 |
| 11.07 | 7.28 | 5.12 | 7.52 | 5.64 | 6.44  | 7.05 | 7.62  | 8.39 |
| 11.41 | 6.69 | 5.42 | 9.21 | 7.46 | 8.81  | 5.06 | 8.96  | 8.43 |
| 11.37 | 6.63 | 5.22 | 8.18 | 6.61 | 7.67  | 6.52 | 8.91  | 8.29 |
| 11.13 | 6.39 | 6.29 | 8.73 | 5.95 | 7.85  | 6.34 | 9.44  | 7.03 |
| 11.42 | 5.99 | 8.88 | 8.42 | 6.91 | 7.39  | 5.38 | 8.12  | 7.8  |
| 11.55 | 6.49 | 8.76 | 8.95 | 7.13 | 8.13  | 3.65 | 7.16  | 7.35 |
| 10.45 | 6.28 | 6.69 | 8.52 | 7.58 | 9.38  | 5.01 | 12.67 | 7.64 |
| 10.41 | 5.57 | 7.39 | 9.03 | 7.93 | 9.69  | 5.1  | 13.45 | 7.85 |
| 11.25 | 4.74 | 6.74 | 7.91 | 7.61 | 12.35 | 7.61 | 14.55 | 8.28 |
| 10.46 | 6.17 | 3.36 | 6.55 | 5.53 | 5.06  | 5.12 | 5.82  | 6.57 |
| 10.39 | 6.35 | 4.49 | 7.81 | 6.92 | 6.57  | 5.38 | 7.89  | 6.18 |
| 10.75 | 5.97 | 4.09 | 7.25 | 7.03 | 5.26  | 2.09 | 7.79  | 6.42 |
| 11.25 | 5.48 | 2.9  | 8.05 | 5.36 | 5.6   | 6.15 | 6.85  | 7.9  |
| 7.95  | 6.89 | 5.85 | 2.76 | 6.4  | 3.76  | 2.76 | 7.57  | 7.18 |
| 8.45  | 6.89 | 5.89 | 3.72 | 6.79 | 7.41  | 1.72 | 7.41  | 7.15 |
| 8.33  | 7.26 | 6.61 | 0.88 | 6.93 | 3.88  | 2.47 | 7.7   | 7.05 |
| 8.11  | 7.24 | 5.91 | 1.96 | 7.19 | 4.86  | 0.96 | 7.19  | 7.31 |
| 9.8   | 5.17 | 5.47 | 6.57 | 6.27 | 8.66  | 4.11 | 8     | 6.96 |
| 9.63  | 5.64 | 4.83 | 5.81 | 6.44 | 8.04  | 3.75 | 6.75  | 7.21 |
| 9.74  | 6    | 5.12 | 4.9  | 6.4  | 7.72  | 4.01 | 6.9   | 7.09 |
| 9.87  | 5.61 | 5.28 | 5.4  | 5.88 | 7.45  | 5.78 | 7.22  | 6.84 |
| 11.1  | 7.68 | 6.05 | 6.69 | 6.21 | 2.68  | 4.88 | 4.68  | 7.98 |
| 11.5  | 5.63 | 5.37 | 8.99 | 6.78 | 10.01 | 4.92 | 10.53 | 7.89 |
| 11.63 | 6.4  | 5.67 | 8.74 | 7.57 | 8.89  | 4    | 8.8   | 7.88 |
| 12.02 | 5.04 | 6.63 | 7.4  | 5.4  | 9.56  | 4.55 | 7.4   | 8.42 |
| 10.74 | 6.26 | 6.92 | 8.01 | 6.2  | 8.02  | 5.07 | 11.91 | 7.1  |
| 11.49 | 6.1  | 4.51 | 6.83 | 4.51 | 8.68  | 4.51 | 7.32  | 8.42 |
| 11.34 | 6.17 | 6.33 | 8.65 | 6.79 | 8.25  | 4.73 | 11.41 | 7.95 |
| 11.36 | 6.72 | 6    | 8.56 | 6.16 | 8.1   | 6.04 | 10.95 | 7.64 |
| 9.84  | 5.54 | 9.41 | 9.79 | 6.17 | 8.8   | 1.68 | 10.84 | 7.04 |
| 10.38 | 5.63 | 8.72 | 8.39 | 6.49 | 7.57  | 5.34 | 11.65 | 7.36 |
| 10.31 | 6.25 | 9.19 | 8.65 | 5.86 | 7.84  | 4.92 | 10.51 | 7.24 |
| 10.2  | 6.19 | 8.39 | 8.06 | 6.7  | 7.08  | 4.58 | 9.11  | 7.45 |
| 10.71 | 6.02 | 4.89 | 7.41 | 6.03 | 8.19  | 6.08 | 8.91  | 7.07 |
| 10.35 | 6.05 | 5.11 | 6.9  | 6.7  | 7.76  | 5.23 | 7.76  | 7.2  |
| 10.09 | 5.69 | 4.96 | 6.19 | 6.1  | 7.64  | 5.26 | 7.95  | 7.29 |

<https://mc.manuscriptcentral.com/gut>

|       |      |      |      |      |       |      |       |      |
|-------|------|------|------|------|-------|------|-------|------|
| 10.75 | 5.25 | 3.79 | 6.65 | 5.74 | 9.25  | 6.6  | 8.38  | 7.62 |
| 9.7   | 5.35 | 7.08 | 7.29 | 5.74 | 6.23  | 5.74 | 9.59  | 5.68 |
| 10.09 | 4.67 | 8.12 | 7.77 | 5.87 | 5.98  | 3.39 | 9.14  | 6.17 |
| 10.01 | 5.01 | 8.23 | 7.71 | 6.22 | 6.35  | 3.07 | 9.78  | 6.13 |
| 8.41  | 6.08 | 6.6  | 3.55 | 7.39 | 7.62  | 1.55 | 9.34  | 6.84 |
| 10.65 | 5.79 | 6.52 | 8.82 | 7.27 | 5.85  | 5.18 | 5.85  | 7.17 |
| 10.27 | 5.73 | 5.15 | 8.87 | 7.78 | 6.7   | 2.53 | 4.93  | 6.97 |
| 10.34 | 5.56 | 5.33 | 8.78 | 7.75 | 6.68  | 2.16 | 5.13  | 7    |
| 8.66  | 6.63 | 6.11 | 0.27 | 7.23 | 4.08  | 0.27 | 8.11  | 7.43 |
| 9.96  | 6.6  | 5.66 | 6.47 | 6.94 | 7.34  | 3.66 | 8.09  | 7.5  |
| 10.97 | 6.28 | 5.72 | 7.69 | 6.14 | 8.49  | 6.71 | 6.46  | 7.42 |
| 10.73 | 5.89 | 4.89 | 7.93 | 6.53 | 8.33  | 5.7  | 6.75  | 7.44 |
| 11.05 | 6.06 | 4.89 | 7.99 | 6.35 | 8.61  | 6    | 6.49  | 7.69 |
| 10.74 | 6.57 | 4.71 | 7.03 | 6.34 | 6.39  | 7.37 | 5.41  | 7.33 |
| 10.4  | 4.13 | 7.3  | 7.35 | 5.35 | 13.43 | 2.54 | 10.72 | 7.24 |
| 10.61 | 5.87 | 6.03 | 7.1  | 6.74 | 6.8   | 3.89 | 8.89  | 6.26 |
| 10.3  | 6.53 | 5.56 | 7.34 | 6.69 | 7.12  | 3.99 | 7.96  | 6.65 |
| 10.58 | 5.45 | 6.23 | 7.23 | 6.21 | 6.84  | 3.92 | 9.12  | 6.55 |

1  
2  
3  
4  
5  
6  
7  
8  
9  
10  
11  
12  
13  
14  
15  
16  
17  
18  
19  
20  
21  
22  
23  
24  
25  
26  
27  
28  
29  
30  
31  
32  
33  
34  
35  
36  
37  
38  
39  
40  
41  
42  
43  
44  
45  
46  
47  
48  
49  
50  
51  
52  
53  
54  
55  
56  
57  
58  
59  
60

| SMAD2 | SMAD3 | SMAD4 | SMAD5 | SMAD9 | SMC3 | SMOC1 | SMURF1 | SMURF2 |
|-------|-------|-------|-------|-------|------|-------|--------|--------|
| 7.47  | 7.64  | 8.4   | 7.31  | 6.38  | 8.54 | 6.77  | 7.76   | 7.59   |
| 7.67  | 7.85  | 8.79  | 7.62  | 5.69  | 8.63 | 6.77  | 8.21   | 7.77   |
| 7.62  | 7.82  | 8.81  | 7.24  | 5.94  | 8.54 | 6.76  | 8.03   | 7.64   |
| 7.92  | 8.79  | 9.58  | 7.46  | 6.06  | 8.74 | 6.04  | 8.58   | 7.43   |
| 7.05  | 8     | 7.58  | 7.82  | 7.95  | 8.95 | 8.24  | 7.45   | 8.41   |
| 7.81  | 7.82  | 8.38  | 7.63  | 6.59  | 8.34 | 6.87  | 7.5    | 7.97   |
| 7.9   | 8.11  | 8.61  | 7.58  | 6.34  | 8.37 | 6.94  | 7.43   | 8.13   |
| 7.41  | 8.99  | 9.16  | 7.18  | 6.37  | 8.46 | 6.39  | 8.39   | 7.8    |
| 7.57  | 8.42  | 8.43  | 6.81  | 4.27  | 8.62 | 1.37  | 8.06   | 7.61   |
| 6.82  | 7.8   | 7.33  | 7.33  | 5.91  | 8.69 | 5.82  | 7.96   | 7.39   |
| 7.42  | 7.91  | 7.98  | 7.49  | 4.29  | 8.6  | 2.96  | 8.05   | 7.64   |
| 7.52  | 8.24  | 8.46  | 7.46  | 5.81  | 8.79 | 4.27  | 8.17   | 7.75   |
| 7.8   | 7.43  | 8.56  | 7.91  | 6.61  | 9.39 | 6.63  | 7.69   | 8.16   |
| 8.06  | 7.57  | 8.7   | 7.78  | 7.05  | 9.39 | 6.32  | 7.93   | 8.22   |
| 6.35  | 9.32  | 10.05 | 6.09  | 7.7   | 10.3 | 4.09  | 9.37   | 7.16   |
| 7.78  | 9.33  | 8.96  | 7.71  | 6.85  | 8.99 | 6.87  | 8.02   | 8.08   |
| 7.83  | 9.42  | 9.32  | 7.81  | 6.96  | 8.98 | 7.04  | 8.34   | 8.31   |
| 7.52  | 9.73  | 9.35  | 7.27  | 7.49  | 8.7  | 6.83  | 8.52   | 8.08   |
| 7.44  | 9.6   | 9.9   | 7.14  | 5.32  | 9.23 | 1.9   | 8.86   | 8      |
| 8.25  | 9     | 9.25  | 8.39  | 5.29  | 9.01 | 3.7   | 8.58   | 8.41   |
| 8.17  | 9.1   | 9.49  | 7.89  | 6.28  | 8.93 | 3.59  | 8.25   | 8.39   |
| 8.1   | 8.37  | 8.52  | 8.45  | 8.01  | 9.06 | 7.02  | 8.32   | 8.43   |
| 8.06  | 8.59  | 8.38  | 8.63  | 7.32  | 9.08 | 7.21  | 8.35   | 8.23   |
| 8.35  | 8.37  | 8.95  | 8.72  | 7.84  | 8.83 | 6.3   | 8.44   | 8.53   |
| 8.42  | 8.64  | 9.97  | 7.26  | 4.01  | 9.92 | 5.95  | 7.41   | 7.19   |
| 8.65  | 8.56  | 9.3   | 7.92  | 3.94  | 8.67 | 3.94  | 7.57   | 8      |
| 8.56  | 8.54  | 9.31  | 7.8   | 5.11  | 8.69 | 3.69  | 7.35   | 7.87   |
| 8.36  | 8.48  | 9.12  | 7.55  | 6.18  | 8.52 | 6.32  | 7.75   | 8.06   |
| 7.97  | 7.81  | 9.06  | 7.43  | 6.17  | 9.02 | 6.37  | 8.07   | 7.5    |
| 7.52  | 7.92  | 8.76  | 7.1   | 6.46  | 9.05 | 6.73  | 8.09   | 7.62   |
| 7.93  | 7.92  | 9.12  | 7.75  | 5.87  | 9.05 | 6.52  | 8.05   | 7.9    |
| 7.55  | 8.04  | 9.15  | 6.92  | 7.01  | 9.04 | 6.99  | 8.17   | 7.84   |
| 7.89  | 8.71  | 8.95  | 7.47  | 7.25  | 8.49 | 6.8   | 7.32   | 7.97   |
| 7.87  | 8.29  | 9     | 8.38  | 6.66  | 9.03 | 6.7   | 9.26   | 7.95   |
| 7.8   | 8.24  | 8.91  | 8.03  | 5.42  | 9.15 | 6.7   | 9.29   | 7.83   |
| 7.51  | 8.41  | 9.07  | 7.81  | 6.47  | 8.97 | 6.25  | 9.27   | 7.89   |
| 6.94  | 8.33  | 9.22  | 5.87  | 4.15  | 8.42 | 0.45  | 7.36   | 7.5    |
| 7.8   | 7.83  | 8.89  | 6.97  | 4.05  | 8.58 | 1.99  | 7.16   | 7.69   |
| 7.5   | 8.03  | 8.91  | 6.76  | 5.07  | 8.34 | 3.54  | 6.92   | 7.43   |
| 7.45  | 7.66  | 9.1   | 6.75  | 4.33  | 8.53 | 2.91  | 7.07   | 7.42   |
| 7.04  | 7.27  | 8.04  | 6.79  | 6.48  | 8.3  | 7.04  | 7.74   | 7.3    |
| 7.32  | 6.91  | 8.04  | 6.78  | 6.78  | 8.34 | 7.56  | 7.93   | 7.16   |
| 6.92  | 6.77  | 7.93  | 6.71  | 6.71  | 8.36 | 7.28  | 7.8    | 7.05   |
| 7.21  | 6.85  | 8.11  | 6.92  | 6.43  | 8.22 | 7.34  | 8.08   | 6.89   |
| 5.86  | 9.37  | 9.2   | 5.18  | 5.18  | 9.59 | 5.86  | 7.86   | 5.67   |
| 7.36  | 8.18  | 8.69  | 7.53  | 5.81  | 8.08 | 3.31  | 7.65   | 7.71   |
| 7.17  | 8.15  | 8.51  | 7.5   | 5.28  | 8.34 | 3.58  | 7.57   | 7.8    |
| 7.9   | 7.95  | 8.84  | 7.72  | 6.39  | 8.25 | 4.27  | 7.51   | 8.04   |
| 8.22  | 8.36  | 10.03 | 7.45  | 5.16  | 9.4  | 5.8   | 8.65   | 8.11   |
| 8.54  | 8.13  | 9.64  | 8.13  | 5.53  | 9.25 | 4.71  | 8.84   | 8.19   |
| 8.5   | 8.43  | 9.66  | 8.61  | 4.95  | 9.43 | 4.74  | 8.69   | 8.1    |

<https://mc.manuscriptcentral.com/gut>

|    |       |      |       |      |      |       |      |       |      |
|----|-------|------|-------|------|------|-------|------|-------|------|
| 1  |       |      |       |      |      |       |      |       |      |
| 2  | 8.55  | 8.11 | 9.73  | 8.19 | 6.4  | 9.12  | 4.25 | 8.79  | 8.23 |
| 3  | 8.06  | 8.8  | 9.15  | 7.67 | 6.85 | 9.34  | 6.74 | 8.12  | 8.47 |
| 4  | 8.27  | 8.83 | 9.26  | 7.98 | 7.01 | 9.08  | 6.76 | 8.37  | 9.14 |
| 5  | 8.23  | 8.81 | 9.1   | 7.65 | 6.86 | 9.3   | 6.86 | 8.42  | 8.98 |
| 6  | 8.22  | 8.98 | 9.08  | 7.87 | 7.43 | 9.11  | 6.83 | 8.2   | 9.11 |
| 7  | 9.11  | 9.27 | 10.09 | 8.33 | 5.78 | 9.2   | 4.81 | 11.22 | 8.08 |
| 8  | 9.6   | 9.31 | 10.66 | 8.44 | 5.29 | 9.46  | 5.57 | 10.8  | 8.13 |
| 9  | 10.18 | 9.42 | 11.21 | 8.55 | 4.09 | 9.74  | 2.32 | 9.03  | 7.85 |
| 10 | 9.53  | 9.02 | 10.85 | 8.71 | 6.25 | 9.18  | 2.02 | 9.71  | 8    |
| 11 | 9.29  | 8.4  | 10.24 | 8.87 | 4.54 | 9.21  | 2.75 | 7.42  | 7.71 |
| 12 | 9.05  | 8.19 | 9.99  | 8.26 | 5.19 | 9.6   | 2.86 | 7.87  | 7.98 |
| 13 | 9.3   | 8.27 | 10.02 | 8.26 | 4.77 | 9.7   | 2.62 | 7.73  | 8.11 |
| 14 | 9.09  | 8.18 | 10.07 | 8.4  | 5.26 | 9.5   | 3.79 | 7.71  | 7.92 |
| 15 | 7.74  | 7.47 | 8.15  | 5.15 | 8.32 | 8.85  | 6.15 | 5.15  | 7.74 |
| 16 | 6.98  | 8.03 | 9.66  | 5.74 | 8.01 | 9.68  | 6.49 | 7.91  | 8.39 |
| 17 | 7.46  | 7.89 | 9.29  | 6.81 | 7.34 | 9.51  | 7.26 | 7.81  | 8.82 |
| 18 | 7.03  | 8.85 | 8.74  | 7.45 | 9.86 | 9.15  | 8.83 | 8.13  | 8.82 |
| 19 | 6.92  | 8.46 | 8.64  | 7.15 | 9.16 | 8.85  | 8.53 | 8.47  | 8.56 |
| 20 | 8.57  | 8.14 | 9.64  | 7.91 | 5.89 | 9.17  | 6.23 | 8.75  | 8.43 |
| 21 | 8.63  | 8.26 | 9.58  | 7.96 | 5.72 | 9.27  | 6.38 | 8.82  | 8.42 |
| 22 | 8.41  | 8.28 | 9.68  | 7.83 | 6.41 | 9.17  | 6.71 | 8.55  | 8.33 |
| 23 | 8.8   | 9.38 | 9.43  | 8.77 | 6.26 | 10.34 | 7.56 | 10.68 | 8.38 |
| 24 | 8.75  | 9.03 | 9.62  | 8.54 | 6.51 | 10.1  | 7.01 | 10.53 | 8.3  |
| 25 | 8.54  | 9.05 | 9.39  | 8.53 | 7.07 | 9.84  | 7.69 | 10.03 | 8.28 |
| 26 | 9.29  | 8.71 | 9.95  | 8.54 | 5.92 | 9.43  | 5.72 | 8.6   | 8.63 |
| 27 | 9.43  | 8.84 | 9.87  | 8.73 | 5.5  | 9.44  | 6.15 | 8.26  | 8.52 |
| 28 | 9.49  | 8.73 | 10.06 | 8.63 | 5.5  | 9.43  | 5.45 | 8.08  | 8.45 |
| 29 | 7.91  | 7.37 | 9.02  | 8.57 | 6.27 | 9.45  | 7.87 | 7.8   | 8.62 |
| 30 | 8.02  | 7.13 | 8.82  | 8.44 | 6.39 | 9.13  | 7.79 | 7.82  | 8.58 |
| 31 | 7.96  | 7.44 | 9.04  | 8.31 | 6.64 | 9.2   | 7.85 | 8.1   | 8.46 |
| 32 | 8.45  | 8.39 | 9.34  | 8.39 | 7.81 | 9     | 6.7  | 8.29  | 8.33 |
| 33 | 8.25  | 8.34 | 9.18  | 8.35 | 7.21 | 9.08  | 6.54 | 8.23  | 8.29 |
| 34 | 8.2   | 8.72 | 9.25  | 8.23 | 7.82 | 9.29  | 7.15 | 8.58  | 8.39 |
| 35 | 7.93  | 8.5  | 8.72  | 7.85 | 6.8  | 8.87  | 6.81 | 8.85  | 8.6  |
| 36 | 7.99  | 8.65 | 8.77  | 7.52 | 6.54 | 8.98  | 6.93 | 8.64  | 8.59 |
| 37 | 7.83  | 8.54 | 8.77  | 7.69 | 7.07 | 8.95  | 6.86 | 8.56  | 8.63 |
| 38 | 8.1   | 8.66 | 8.92  | 7.86 | 6.78 | 8.88  | 7.37 | 8.26  | 8.18 |
| 39 | 8.1   | 8.66 | 8.92  | 7.86 | 6.78 | 8.88  | 7.37 | 8.26  | 8.18 |
| 40 | 7.53  | 8.88 | 8.7   | 7.37 | 7.4  | 8.84  | 7.24 | 8.5   | 8.28 |
| 41 | 8.08  | 9.01 | 8.85  | 7.8  | 7.55 | 8.9   | 7.31 | 8.24  | 8.27 |
| 42 | 8.03  | 9.11 | 8.83  | 7.95 | 7.45 | 8.87  | 7.29 | 8.45  | 8.43 |
| 43 | 8.27  | 8.06 | 8.64  | 7.64 | 7.35 | 9.05  | 7.73 | 7.74  | 8.29 |
| 44 | 8.53  | 8.39 | 8.46  | 7.91 | 7.01 | 9.09  | 6.87 | 8.66  | 8.29 |
| 45 | 9.15  | 8.65 | 8.48  | 8.01 | 6.37 | 8.85  | 6.76 | 8.48  | 8.24 |
| 46 | 8.67  | 8.1  | 8.7   | 7.53 | 7.57 | 9.01  | 7.71 | 8.44  | 8.22 |
| 47 | 8.77  | 8.04 | 9.84  | 8.21 | 6.03 | 8.65  | 4.37 | 7.73  | 7.78 |
| 48 | 8.62  | 8.28 | 10.09 | 7.95 | 4.32 | 8.9   | 5.72 | 7.88  | 7.82 |
| 49 | 8.11  | 8.06 | 10.08 | 7.32 | 6.01 | 8.67  | 3.69 | 7.98  | 7.53 |
| 50 | 8.08  | 8.2  | 8.96  | 7.44 | 7.14 | 8.93  | 7.24 | 7.7   | 8.11 |
| 51 | 8.27  | 7.81 | 9.08  | 7.77 | 7.49 | 9.02  | 7.15 | 7.8   | 7.84 |
| 52 | 8.22  | 8.06 | 9.04  | 7.79 | 7.65 | 9.04  | 7.26 | 7.77  | 7.86 |
| 53 | 7.55  | 7.22 | 8.26  | 7.43 | 7.08 | 9.1   | 7.03 | 8     | 7.81 |

<https://mc.manuscriptcentral.com/gut>

|    |      |      |       |      |      |      |      |       |       |
|----|------|------|-------|------|------|------|------|-------|-------|
| 1  |      |      |       |      |      |      |      |       |       |
| 2  | 7.4  | 7.78 | 8.22  | 7.68 | 6.88 | 9    | 6.83 | 8.14  | 8.01  |
| 3  | 6.85 | 8.04 | 8.43  | 7.34 | 7.99 | 9.22 | 7.57 | 8.14  | 7.95  |
| 4  | 7.95 | 8.86 | 8.98  | 7.42 | 6.73 | 8.64 | 5.67 | 7.85  | 8.19  |
| 5  | 8.1  | 9.09 | 9.17  | 8.09 | 6.27 | 8.95 | 4.4  | 8.57  | 8.05  |
| 6  | 8.09 | 9.1  | 9.38  | 7.86 | 7.19 | 8.85 | 4.4  | 8.37  | 8.32  |
| 7  | 7.64 | 8.84 | 9.43  | 6.11 | 5.21 | 8.98 | 3.58 | 8.17  | 7.72  |
| 8  | 8.7  | 8.46 | 8.58  | 7.14 | 4.45 | 8.73 | 1.55 | 8.42  | 8.03  |
| 9  | 8.68 | 8.77 | 8.59  | 6.93 | 4.8  | 8.88 | 4.22 | 8.52  | 8.07  |
| 10 | 6.08 | 9.6  | 10.04 | 5.82 | 7.54 | 9.58 | 4.08 | 9.49  | 6.95  |
| 11 | 6.84 | 8.77 | 9.43  | 6.55 | 4.96 | 8.3  | 3.11 | 8.44  | 7.27  |
| 12 | 6.87 | 8.41 | 9.23  | 7.18 | 4.81 | 8.59 | 6.13 | 8.52  | 7.81  |
| 13 | 7.18 | 7.61 | 8.24  | 7.33 | 6.32 | 8.29 | 7    | 7.87  | 7.6   |
| 14 | 5.96 | 9.43 | 9.98  | 6.17 | 6.58 | 8.8  | 5.96 | 9.16  | 6.72  |
| 15 | 7.22 | 8.39 | 8.01  | 6.85 | 9.35 | 9.77 | 8.75 | 8.35  | 8.39  |
| 16 | 7.92 | 7.68 | 8.34  | 6.9  | 5.23 | 9.39 | 3.65 | 7.33  | 7.14  |
| 17 | 8    | 7.76 | 8.08  | 7.18 | 4    | 9.5  | 2.83 | 7.24  | 7.41  |
| 18 | 7.86 | 7.86 | 8.38  | 7.08 | 5.54 | 9.32 | 4.16 | 7.38  | 7.34  |
| 19 | 8.35 | 9.84 | 9.68  | 7.61 | 4.43 | 9.46 | 4.24 | 8.83  | 10.17 |
| 20 | 7.94 | 9.21 | 8.92  | 7.28 | 6.28 | 8.7  | 6.24 | 8.54  | 10.07 |
| 21 | 8.25 | 9.44 | 9.08  | 7.4  | 6.46 | 9.11 | 5.8  | 8.73  | 10.58 |
| 22 | 6.16 | 8.33 | 10.02 | 6.16 | 6.75 | 9.62 | 6.16 | 10.69 | 5.16  |
| 23 | 8.48 | 8.74 | 8.65  | 7.2  | 4.18 | 8.72 | 3.3  | 10.51 | 7.35  |
| 24 | 8.08 | 8.55 | 8.93  | 7.38 | 4.78 | 8.83 | 3.71 | 9.95  | 7.91  |
| 25 | 7.06 | 9.47 | 9.91  | 6.31 | 7.09 | 8.73 | 3.99 | 8.25  | 5.82  |
| 26 | 6.86 | 9.6  | 9.66  | 5.81 | 7.38 | 8.92 | 4.23 | 8.77  | 6.4   |
| 27 | 7.86 | 8.87 | 9.59  | 7.24 | 6.52 | 8.56 | 3.54 | 8.31  | 7.4   |
| 28 | 7.61 | 7.76 | 8.27  | 7.06 | 7.64 | 9.19 | 7.99 | 8.54  | 8.04  |
| 29 | 7.53 | 7.64 | 8.37  | 7.28 | 7.63 | 9.16 | 8.26 | 8.44  | 7.97  |
| 30 | 7.52 | 7.29 | 8.48  | 7.16 | 7.63 | 8.94 | 7.94 | 7.94  | 8.05  |
| 31 | 7.64 | 7.58 | 8.3   | 6.82 | 5.18 | 7.56 | 1.01 | 7.23  | 7.3   |
| 32 | 7.02 | 7.25 | 8.56  | 7.15 | 6.4  | 7.95 | 1.18 | 6.62  | 7.27  |
| 33 | 7.05 | 7.38 | 8.52  | 6.78 | 6.22 | 7.75 | 3.92 | 7.11  | 6.81  |
| 34 | 7.73 | 7.59 | 8.23  | 7.59 | 6.28 | 7.5  | 2.16 | 7.37  | 7.48  |
| 35 | 7.02 | 7.07 | 7.92  | 6.21 | 6.86 | 8.01 | 7.31 | 7.15  | 7.41  |
| 36 | 6.25 | 7.31 | 7.37  | 6.66 | 6.94 | 8.32 | 7.05 | 7.16  | 6.84  |
| 37 | 6.26 | 7.33 | 7.37  | 6.6  | 6.6  | 8.15 | 6.79 | 6.91  | 6.72  |
| 38 | 6.92 | 7.51 | 7.93  | 6.59 | 8.05 | 8.1  | 7.59 | 6.85  | 7.77  |
| 39 | 7.14 | 6.79 | 8.14  | 7.14 | 7.22 | 8.32 | 7.24 | 7.19  | 7.29  |
| 40 | 7.23 | 7.16 | 7.62  | 7    | 6.68 | 8.3  | 7.47 | 6.9   | 7.49  |
| 41 | 7.2  | 7.2  | 7.82  | 6.75 | 6.86 | 8.31 | 7.34 | 6.95  | 7.24  |
| 42 | 7.11 | 5.73 | 7.8   | 5.22 | 8.54 | 5.87 | 6.93 | 5.73  | 7.8   |
| 43 | 7.9  | 7.89 | 8.57  | 7.55 | 7.32 | 9.42 | 8.01 | 8.17  | 8.38  |
| 44 | 8.08 | 8.04 | 8.87  | 7.73 | 8.11 | 9.49 | 8.52 | 8.29  | 8.42  |
| 45 | 7.33 | 7.9  | 8.76  | 7.15 | 6.73 | 8.98 | 7.55 | 8.27  | 7.24  |
| 46 | 7.79 | 7.87 | 8.53  | 7.23 | 7.63 | 9.01 | 8.01 | 7.92  | 8.12  |
| 47 | 7.34 | 8.25 | 8.38  | 6.98 | 7.21 | 8.89 | 7.26 | 8.98  | 7.78  |
| 48 | 8.08 | 8.06 | 8.67  | 7.31 | 7.9  | 9.46 | 7.69 | 9.63  | 8.26  |
| 49 | 8.07 | 7.81 | 8.64  | 7.31 | 7.94 | 9.37 | 7.98 | 9.5   | 8.49  |
| 50 | 8.27 | 8.01 | 8.71  | 7.44 | 8.07 | 8.73 | 8.2  | 8.62  | 8.71  |
| 51 | 7.1  | 7.42 | 8.12  | 7.78 | 6.27 | 9.14 | 6.48 | 7.29  | 7.63  |
| 52 | 7.29 | 7.21 | 8.26  | 7.73 | 6.07 | 9.09 | 6.01 | 7.77  | 7.75  |
| 53 | 7.59 | 7.29 | 8.09  | 7.51 | 6.23 | 9.23 | 6.61 | 7.84  | 7.83  |

1  
2  
3  
4  
5  
6  
7  
8  
9  
10  
11  
12  
13  
14  
15  
16  
17  
18  
19  
20  
21  
22  
23  
24  
25  
26  
27  
28  
29  
30  
31  
32  
33  
34  
35  
36  
37  
38  
39  
40  
41  
42  
43  
44  
45  
46  
47  
48  
49  
50  
51  
52  
53  
54  
55  
56  
57  
58  
59  
60

|      |       |       |      |      |      |      |      |      |
|------|-------|-------|------|------|------|------|------|------|
| 7.38 | 7.52  | 8.16  | 7.48 | 6.05 | 9.34 | 6.63 | 8.08 | 7.98 |
| 9.59 | 8.15  | 9.21  | 8.12 | 6.1  | 9.02 | 8.7  | 8.48 | 8.35 |
| 9.21 | 8.28  | 9.04  | 8    | 6.85 | 9.2  | 8.39 | 8.73 | 8.31 |
| 8.75 | 8.17  | 9.01  | 8    | 5.99 | 9.29 | 9.61 | 8.61 | 8.16 |
| 8.68 | 8.29  | 9.12  | 8.04 | 6.38 | 9.32 | 9.58 | 8.46 | 8.11 |
| 8.57 | 8.74  | 9.79  | 8.2  | 6.95 | 8.71 | 7.48 | 8.33 | 8.82 |
| 8.06 | 9.25  | 10.06 | 7.77 | 6.3  | 9.12 | 6.13 | 8.71 | 8.31 |
| 8.69 | 8.82  | 9.81  | 8.34 | 6.21 | 8.97 | 5.62 | 8.47 | 8.67 |
| 7.68 | 9.25  | 10.55 | 7.87 | 7.84 | 9.28 | 6.27 | 8.67 | 7.96 |
| 8.95 | 9.72  | 10.5  | 8.12 | 5.81 | 8.92 | 3.93 | 9.15 | 8.45 |
| 9.32 | 9.07  | 10.3  | 8.15 | 6.81 | 8.87 | 5.29 | 9.37 | 8.4  |
| 9.06 | 9.17  | 10.27 | 8.06 | 7.01 | 8.86 | 5.59 | 9.53 | 8.67 |
| 9.3  | 9.13  | 10.49 | 8.31 | 6.97 | 8.69 | 4.82 | 9.09 | 8.36 |
| 8.14 | 8.57  | 8.82  | 7.54 | 5.87 | 8.87 | 5.76 | 8.02 | 7.59 |
| 8.11 | 8.82  | 8.93  | 7.98 | 5.81 | 8.86 | 4.87 | 8.45 | 7.64 |
| 7.47 | 8.49  | 9.32  | 7.2  | 8    | 8.9  | 6.32 | 8.35 | 7.52 |
| 8.06 | 8.69  | 9.36  | 8.04 | 6.04 | 8.56 | 2.32 | 7.5  | 8.11 |
| 8.05 | 8.36  | 9.26  | 8    | 5.57 | 8.62 | 4.25 | 7.72 | 8.26 |
| 7.89 | 8.69  | 9.31  | 7.79 | 6.93 | 8.64 | 3.84 | 7.7  | 8.3  |
| 8.32 | 8.54  | 9.47  | 7.97 | 4.84 | 9.1  | 2.25 | 7.93 | 8.04 |
| 7.99 | 8.4   | 8.87  | 8.11 | 5.04 | 9.14 | 5.45 | 7.93 | 8.36 |
| 8.19 | 8.36  | 8.73  | 7.91 | 5.43 | 8.96 | 4.43 | 7.86 | 8.53 |
| 7.86 | 8.52  | 9.08  | 7.69 | 6.94 | 8.6  | 6.57 | 7.85 | 7.98 |
| 7.93 | 9.25  | 9.24  | 7.84 | 6.42 | 8.66 | 6.1  | 8.21 | 7.8  |
| 5.74 | 10.15 | 10.65 | 6.96 | 8.98 | 8.82 | 4.15 | 8.98 | 7.15 |
| 7.51 | 7.17  | 8.53  | 7.03 | 4.45 | 8.36 | 3.82 | 6.01 | 6.87 |
| 7.62 | 6.55  | 8.64  | 7.49 | 6.08 | 7.77 | 5.18 | 6.25 | 7.15 |
| 7.9  | 6.44  | 8.62  | 7.17 | 5.22 | 8.05 | 4.22 | 6.26 | 6.94 |
| 8.39 | 5.9   | 9.01  | 8.11 | 3.9  | 8.77 | 3.9  | 6.54 | 7.33 |
| 7.22 | 6.89  | 7.46  | 6.8  | 7.08 | 8.34 | 7.31 | 6.57 | 6.76 |
| 6.55 | 6.33  | 7.33  | 6.81 | 6.55 | 8.3  | 7.2  | 6.63 | 7    |
| 6.99 | 6.99  | 7.57  | 7.07 | 6.77 | 8.46 | 7.5  | 6.79 | 7.26 |
| 6.98 | 6.48  | 7.19  | 7.09 | 6.68 | 8.5  | 7.51 | 6.57 | 7.3  |
| 6.57 | 7.82  | 7.8   | 6.31 | 5.27 | 7.43 | 5.93 | 7.09 | 7.31 |
| 6.48 | 7.4   | 7.85  | 6.4  | 6.2  | 7.66 | 6.28 | 7.13 | 7.12 |
| 6.54 | 7.48  | 7.67  | 6.57 | 5.88 | 7.75 | 6.31 | 7.06 | 7.17 |
| 6.85 | 7.28  | 8     | 6.59 | 5.71 | 7.68 | 6.05 | 7.29 | 7.28 |
| 7.84 | 9.52  | 9.36  | 7.28 | 5.88 | 8.78 | 3.16 | 7.39 | 7.98 |
| 7.34 | 8.53  | 9.16  | 7.11 | 6.78 | 9.12 | 5.16 | 7.73 | 7.65 |
| 7.82 | 8.59  | 9.45  | 7.25 | 5.33 | 8.81 | 4.33 | 8.64 | 8.1  |
| 6.04 | 9.52  | 10.15 | 5.04 | 5.69 | 9.4  | 4.55 | 9.08 | 7.66 |
| 7.78 | 8.05  | 8.9   | 7.28 | 5.85 | 9.05 | 5.58 | 8.3  | 7.77 |
| 5.51 | 8.68  | 10.76 | 4.51 | 7.83 | 9.32 | 4.51 | 8.9  | 6.83 |
| 7.96 | 8.45  | 8.99  | 7.84 | 5.19 | 8.8  | 4.19 | 8.71 | 8.43 |
| 8.05 | 8.51  | 9     | 8.06 | 6.24 | 8.82 | 2.26 | 9.44 | 8.4  |
| 8.65 | 8.75  | 9.82  | 7.06 | 3.27 | 8.96 | 6.44 | 8.74 | 5.54 |
| 7.75 | 8.69  | 9.45  | 6.8  | 6.05 | 8.89 | 6.43 | 8.38 | 6.94 |
| 7.79 | 8.51  | 9.32  | 6.99 | 4.98 | 8.94 | 6.23 | 8.45 | 6.49 |
| 8.06 | 8.18  | 9.26  | 6.81 | 6.14 | 8.89 | 6.67 | 8.22 | 7.09 |
| 7.35 | 7.49  | 8.37  | 7.1  | 4.22 | 8.52 | 5.38 | 7.37 | 7.07 |
| 7.21 | 7.26  | 8.28  | 6.9  | 6.34 | 8.22 | 6.23 | 6.92 | 7.42 |
| 7.22 | 7.14  | 8.23  | 6.68 | 6.1  | 8.3  | 6.08 | 7    | 7.31 |

<https://mc.manuscriptcentral.com/gut>



1  
2  
3  
4  
5  
6  
7  
8  
9  
10  
11  
12  
13  
14  
15  
16  
17  
18  
19  
20  
21  
22  
23  
24  
25  
26  
27  
28  
29  
30  
31  
32  
33  
34  
35  
36  
37  
38  
39  
40  
41  
42  
43  
44  
45  
46  
47  
48  
49  
50  
51  
52  
53  
54  
55  
56  
57  
58  
59  
60

|      |      |      |      |      |      |      |      |      |
|------|------|------|------|------|------|------|------|------|
| 6.92 | 7.46 | 9.2  | 6.83 | 7.22 | 8.4  | 5.25 | 7.46 | 6.77 |
| 6.42 | 7.73 | 8.51 | 6.83 | 5.8  | 8.18 | 5.49 | 7.19 | 6.19 |
| 6.81 | 7.24 | 8.25 | 6.89 | 5.34 | 8.71 | 5.29 | 6.67 | 6.67 |
| 6.55 | 7.31 | 8.42 | 7.12 | 5.35 | 9    | 5.24 | 6.27 | 6.75 |
| 6.25 | 7.2  | 8.31 | 5.64 | 7.6  | 8.7  | 6.98 | 7.53 | 6.95 |
| 7.53 | 7.53 | 8.77 | 7.42 | 3.57 | 8.29 | 2.73 | 6.84 | 7.39 |
| 7.29 | 7.27 | 8.71 | 6.97 | 3.46 | 8.43 | 0.07 | 6.45 | 6.89 |
| 7.27 | 7.41 | 8.9  | 6.91 | 2.52 | 8.42 | 0.35 | 6.26 | 6.68 |
| 7.53 | 7.11 | 8.07 | 6.81 | 7.21 | 8.79 | 7.92 | 7.86 | 7.55 |
| 7.45 | 7.47 | 8.55 | 6.94 | 6.8  | 8.27 | 6.85 | 7.45 | 7.57 |
| 7.45 | 8.86 | 8.91 | 7.33 | 5.8  | 8.01 | 2.24 | 7.62 | 7.89 |
| 7.21 | 8.2  | 8.65 | 7.43 | 6.84 | 8.12 | 5.64 | 7.58 | 7.91 |
| 7.5  | 8.46 | 9.4  | 7.2  | 6.96 | 7.97 | 4.76 | 7.87 | 7.55 |
| 7.92 | 7.78 | 8.93 | 7.58 | 6.78 | 7.72 | 5.13 | 7.73 | 7.78 |
| 4.87 | 8.83 | 9.36 | 5.35 | 4.13 | 8.95 | 4.87 | 9.97 | 5.71 |
| 7.1  | 6.88 | 8.43 | 7.06 | 4.97 | 7.95 | 5.23 | 6.9  | 7.13 |
| 7.23 | 6.75 | 7.96 | 7.37 | 5.56 | 7.7  | 5.91 | 6.96 | 7.59 |
| 6.67 | 7.24 | 8.65 | 6.79 | 4.92 | 7.87 | 5    | 7.04 | 6.97 |

1  
2  
3  
4  
5  
6  
7  
8  
9  
10  
11  
12  
13  
14  
15  
16  
17  
18  
19  
20  
21  
22  
23  
24  
25  
26  
27  
28  
29  
30  
31  
32  
33  
34  
35  
36  
37  
38  
39  
40  
41  
42  
43  
44  
45  
46  
47  
48  
49  
50  
51  
52  
53  
54  
55  
56  
57  
58  
59  
60

| SNAI1 | SNAI2 | SNAI3 | SNRPF | SOD1 | SORD  | SOX17 | SOX2 | SOX9  |
|-------|-------|-------|-------|------|-------|-------|------|-------|
| 6.77  | 6.16  | 7.15  | 8.46  | 7.32 | 8.18  | 7.22  | 6.25 | 7.8   |
| 6.84  | 6.41  | 6.03  | 8.68  | 6.89 | 9.19  | 7.01  | 5.59 | 8.41  |
| 6.82  | 6.85  | 6.54  | 8.59  | 7.21 | 9.1   | 6.8   | 6.59 | 8.01  |
| 6.55  | 7.27  | 5.46  | 8.58  | 7.18 | 9.34  | 6.31  | 7.43 | 8.77  |
| 8.27  | 1.01  | 7.1   | 7.42  | 8    | 8.73  | 8.67  | 7.44 | 8.22  |
| 7.01  | 6.22  | 5.47  | 8.93  | 7.31 | 7.86  | 7.09  | 5.19 | 9.54  |
| 7.31  | 6.95  | 5.78  | 8.88  | 7.15 | 8.03  | 7.03  | 5.24 | 9.61  |
| 7.14  | 7.44  | 4.79  | 8.87  | 8.32 | 7.74  | 5.64  | 4.3  | 10.1  |
| 6.41  | 7.15  | 5.79  | 9.05  | 6.92 | 7.4   | 5.45  | 7.21 | 8.58  |
| 6.51  | 6.3   | 5.74  | 9.21  | 7.24 | 8.42  | 6.49  | 6.51 | 9.1   |
| 6.21  | 6.99  | 4.08  | 10.1  | 6.86 | 8.17  | 4.08  | 6.4  | 9.26  |
| 7.34  | 7.61  | 4.77  | 9.52  | 7.21 | 8.17  | 5.89  | 6.27 | 9.19  |
| 7.45  | 6.64  | 6.3   | 9.63  | 7.4  | 9.68  | 7.38  | 4.61 | 9.32  |
| 7.67  | 7.99  | 6.57  | 9.29  | 7.32 | 9.61  | 7.41  | 5.76 | 8.99  |
| 8.32  | 7.86  | 7.02  | 8     | 8.99 | 9.53  | 6.41  | 8.61 | 9.63  |
| 7.63  | 6.34  | 6.94  | 8.51  | 7.74 | 8.82  | 7.43  | 5.9  | 8.64  |
| 7.07  | 6.46  | 7.48  | 8.65  | 7.65 | 9.39  | 7.31  | 6.33 | 9.66  |
| 7.83  | 7.08  | 7.1   | 8.44  | 7.78 | 9.08  | 7.38  | 6.15 | 9.17  |
| 7.32  | 6.85  | 7.27  | 8.94  | 6.9  | 7.77  | 5.32  | 5.78 | 9.45  |
| 6.37  | 6.99  | 5.54  | 10.16 | 6.42 | 10.04 | 5.5   | 6.18 | 10.48 |
| 6.81  | 6.93  | 6.14  | 9.77  | 6.83 | 8.88  | 6.05  | 5.79 | 9.98  |
| 6.59  | 7.57  | 5.06  | 10.27 | 6.79 | 9.91  | 5.82  | 4.4  | 9.69  |
| 6.69  | 8.1   | 5.2   | 10.3  | 6.86 | 10.13 | 5.87  | 3.66 | 10.02 |
| 6.37  | 7.47  | 4.65  | 9.97  | 7.05 | 9.61  | 6.14  | 2.89 | 9.78  |
| 7.38  | 4.75  | 7.22  | 10.05 | 6.26 | 9.93  | 4.33  | 1.43 | 9.02  |
| 5.65  | 5.42  | 4.38  | 10.4  | 6.77 | 10.95 | 3.94  | 2.45 | 9.4   |
| 5.33  | 5.16  | 4.91  | 10.3  | 6.71 | 10.99 | 4.52  | 2.84 | 9.73  |
| 6.47  | 5.2   | 6.74  | 9.32  | 7.15 | 10.72 | 6.94  | 5.24 | 9.13  |
| 7.27  | 4.74  | 7.08  | 9.31  | 7.12 | 9.03  | 6.8   | 4.78 | 8.67  |
| 7.11  | 5.58  | 6.85  | 8.7   | 7.69 | 9.26  | 7     | 4.98 | 8.59  |
| 7.28  | 5.15  | 7.21  | 9.37  | 7.35 | 9.24  | 7.07  | 4.84 | 9.51  |
| 7.66  | 6.23  | 7.6   | 8.4   | 7.8  | 9.07  | 7.66  | 5.35 | 8.59  |
| 7.59  | 4.3   | 7.24  | 8.03  | 6.84 | 7.43  | 7.09  | 5.45 | 6.35  |
| 7.26  | 7.92  | 4.52  | 9.56  | 6.33 | 9.85  | 5.42  | 7.4  | 10.26 |
| 7.03  | 7.2   | 4.7   | 9.94  | 6.35 | 9.75  | 5.04  | 7.04 | 10.4  |
| 7.18  | 7.62  | 4.72  | 9.43  | 6.66 | 9.49  | 6.06  | 7.56 | 10.22 |
| 5.9   | 5.49  | 5.35  | 8.74  | 6.17 | 8.06  | 4.62  | 0.45 | 8.58  |
| 5.26  | 7.32  | 4.76  | 9.57  | 6.55 | 9.17  | 4.65  | 2.57 | 8.43  |
| 5.27  | 7.12  | 5.76  | 8.98  | 6.3  | 8.05  | 5.37  | 2.95 | 7.87  |
| 4.44  | 6.69  | 5.6   | 9.02  | 6.37 | 8.32  | 5.44  | 2.07 | 7.64  |
| 6.81  | 5.97  | 6.43  | 7.94  | 6.75 | 8.17  | 7.13  | 5.24 | 8.85  |
| 7.15  | 5.83  | 6.36  | 8.23  | 6.39 | 8.34  | 6.86  | 5.63 | 9.09  |
| 6.85  | 5.47  | 5.97  | 8.03  | 6.08 | 8.24  | 6.74  | 5.83 | 8.77  |
| 6.04  | 5.7   | 5.34  | 8.64  | 6.17 | 8.15  | 6     | 5.37 | 9.6   |
| 7.18  | 4.86  | 5.67  | 8.74  | 8.11 | 8.84  | 5.67  | 6.45 | 8.53  |
| 5.12  | 6.12  | 5.02  | 9.62  | 6.12 | 8.26  | 4.02  | 4.4  | 9.46  |
| 5.67  | 6.89  | 4.86  | 9.84  | 5.88 | 7.71  | 5.25  | 2    | 9.25  |
| 6.23  | 7.77  | 3.98  | 9.23  | 6.11 | 7.29  | 4.45  | 2.13 | 8.97  |
| 7.11  | 7.52  | 5.92  | 10.09 | 7.98 | 10.05 | 5.44  | 2.96 | 10.04 |
| 7.39  | 7.76  | 4.59  | 10.69 | 7.69 | 9.71  | 5.33  | 2.59 | 10.34 |
| 6.35  | 6.62  | 4.5   | 10.93 | 7.83 | 9.45  | 5.02  | 0.5  | 10.34 |

<https://mc.manuscriptcentral.com/gut>

1  
2  
3  
4  
5  
6  
7  
8  
9  
10  
11  
12  
13  
14  
15  
16  
17  
18  
19  
20  
21  
22  
23  
24  
25  
26  
27  
28  
29  
30  
31  
32  
33  
34  
35  
36  
37  
38  
39  
40  
41  
42  
43  
44  
45  
46  
47  
48  
49  
50  
51  
52  
53  
54  
55  
56  
57  
58  
59  
60

|      |      |      |       |       |       |      |       |       |
|------|------|------|-------|-------|-------|------|-------|-------|
| 6.92 | 7.67 | 4.99 | 10.67 | 7.56  | 9.47  | 5.44 | 2.4   | 10.18 |
| 8.03 | 5.52 | 6.52 | 9.86  | 8.04  | 9.43  | 7.67 | 4.94  | 10.07 |
| 7.92 | 6.56 | 6.65 | 9.98  | 8.52  | 9.38  | 8.07 | 5.14  | 9.96  |
| 7.72 | 6.65 | 6.38 | 10.03 | 8.26  | 9.7   | 7.71 | 4.41  | 9.89  |
| 7.77 | 5.52 | 6.71 | 9.88  | 8.3   | 9.2   | 7.86 | 4.49  | 9.88  |
| 5.9  | 6.52 | 6.21 | 10.51 | 6.94  | 8.66  | 5.78 | 7.7   | 9.63  |
| 6.22 | 6.69 | 4.77 | 10.72 | 6.62  | 9.21  | 4.77 | 7.82  | 10.61 |
| 6.13 | 5.84 | 4.25 | 10.89 | 6.8   | 9.76  | 4.21 | 7.95  | 10.64 |
| 6.67 | 6.71 | 4.69 | 10.69 | 6.91  | 9.59  | 5.02 | 8.3   | 10.67 |
| 5.56 | 5.92 | 5.28 | 10.08 | 6.2   | 10.05 | 5.49 | 5.71  | 10.65 |
| 6.16 | 6.1  | 5.19 | 10.46 | 6.52  | 10.03 | 5.4  | 5.3   | 10.62 |
| 6.08 | 6.04 | 4.86 | 10.73 | 6.5   | 10.19 | 4.99 | 4.4   | 10.69 |
| 5.84 | 5.73 | 4.93 | 10.5  | 6.28  | 10.16 | 4.62 | 4.23  | 10.33 |
| 9.61 | 5.15 | 9.74 | 8.85  | 10.11 | 7.74  | 8.74 | 11.64 | 9.4   |
| 8.22 | 6.28 | 7.68 | 8.6   | 8.48  | 9.01  | 7.62 | 8.38  | 9.56  |
| 7.78 | 5.91 | 7.17 | 9.03  | 8.03  | 8.34  | 7.51 | 6.96  | 9.22  |
| 9.79 | 0.24 | 9.02 | 7.77  | 9.21  | 8.73  | 9.65 | 9.07  | 9.44  |
| 9.74 | 2.36 | 9.17 | 7.56  | 9.64  | 8.9   | 9.9  | 8.48  | 9.04  |
| 6.81 | 5.95 | 6.5  | 9.93  | 7.4   | 10.01 | 7.07 | 4.14  | 10.28 |
| 6.7  | 5.65 | 6.85 | 9.95  | 7.25  | 10.46 | 7.24 | 4.51  | 10.24 |
| 7.2  | 5.67 | 7.2  | 9.46  | 7.75  | 10.11 | 7.59 | 4.92  | 10.28 |
| 6.63 | 6.94 | 4    | 10.41 | 6.74  | 8.92  | 6.11 | 4.52  | 10.29 |
| 6.58 | 6.41 | 5.6  | 10.37 | 6.89  | 8.63  | 6.79 | 5.28  | 10.12 |
| 7.16 | 6.48 | 6.18 | 9.82  | 6.57  | 8.88  | 7.69 | 5.86  | 9.72  |
| 6.19 | 6.98 | 5.68 | 9.86  | 7.52  | 9.56  | 5.68 | 5.54  | 10.16 |
| 7.1  | 7.65 | 5.53 | 9.82  | 7.67  | 8.29  | 5.4  | 4.36  | 10.46 |
| 6.57 | 7.59 | 4.94 | 9.62  | 7.71  | 7.78  | 5.39 | 4.01  | 10.36 |
| 8.05 | 6.73 | 6.19 | 10.74 | 7.07  | 9.26  | 6.72 | 4.94  | 9.6   |
| 7.86 | 6.77 | 6.11 | 10.78 | 6.98  | 9.06  | 6.52 | 5.68  | 9.66  |
| 7.76 | 6.11 | 6.22 | 10.47 | 7.06  | 9.05  | 6.89 | 5.58  | 9.3   |
| 8.02 | 6.53 | 6.91 | 9.36  | 7.68  | 10.11 | 8.12 | 5.37  | 10.51 |
| 7.5  | 6.24 | 6.71 | 9.71  | 7.88  | 10.51 | 7.67 | 4.84  | 10.82 |
| 7.73 | 5.63 | 7.09 | 9.4   | 8.02  | 10.33 | 7.97 | 5.82  | 10.4  |
| 7.16 | 7.22 | 6.25 | 9.24  | 7.58  | 8.29  | 7.64 | 5.84  | 8.94  |
| 7.51 | 7.24 | 6.35 | 9.49  | 7.53  | 8.76  | 7.69 | 5.94  | 9.15  |
| 7.87 | 7.85 | 6.21 | 9.26  | 7.54  | 8.16  | 7.69 | 5.78  | 8.87  |
| 7.32 | 6.44 | 6.93 | 7.87  | 7.48  | 8.65  | 7.68 | 5.19  | 8.97  |
| 7.32 | 6.44 | 6.93 | 7.87  | 7.48  | 8.65  | 7.68 | 5.19  | 8.97  |
| 6.96 | 4.73 | 6.56 | 8.42  | 7.79  | 9.56  | 7.7  | 6.06  | 10.27 |
| 7.6  | 5.7  | 6.57 | 8.19  | 7.84  | 8.96  | 7.89 | 6.08  | 9.64  |
| 7.69 | 6.69 | 6.36 | 8.16  | 7.66  | 9     | 7.33 | 5.47  | 9.83  |
| 7.35 | 4.14 | 6.64 | 7.82  | 7.36  | 8.9   | 7.85 | 6.86  | 6.98  |
| 7.22 | 6.56 | 5.85 | 8.81  | 7.03  | 9.78  | 7.3  | 7.17  | 8.38  |
| 7.34 | 6.04 | 5.97 | 9.03  | 7.27  | 9.61  | 7.05 | 7.09  | 8.17  |
| 7.18 | 5    | 6.37 | 8.08  | 7.34  | 9.34  | 7.69 | 6.88  | 7.71  |
| 7.48 | 7.12 | 4.68 | 9.86  | 7.93  | 9.18  | 5.15 | 1.73  | 10.45 |
| 7.57 | 6.21 | 4.25 | 10.01 | 7.95  | 9.07  | 4.32 | 1.66  | 10.26 |
| 7.35 | 7.82 | 6.07 | 9.29  | 8.49  | 9.14  | 5.69 | 3.52  | 9.98  |
| 7.37 | 4.91 | 6.74 | 7.95  | 7.13  | 8.69  | 7.59 | 5.48  | 7.39  |
| 7.59 | 7.09 | 7.04 | 8.22  | 7.51  | 8.81  | 7.82 | 5.82  | 7.82  |
| 6.87 | 5.46 | 6.63 | 8.21  | 7.2   | 9.12  | 7.35 | 6.36  | 7.95  |
| 6.97 | 5.98 | 6.15 | 8.35  | 6.7   | 8.09  | 7.15 | 5.44  | 9.52  |

<https://mc.manuscriptcentral.com/gut>

1  
2  
3  
4  
5  
6  
7  
8  
9  
10  
11  
12  
13  
14  
15  
16  
17  
18  
19  
20  
21  
22  
23  
24  
25  
26  
27  
28  
29  
30  
31  
32  
33  
34  
35  
36  
37  
38  
39  
40  
41  
42  
43  
44  
45  
46  
47  
48  
49  
50  
51  
52  
53  
54  
55  
56  
57  
58  
59  
60

|      |      |      |       |       |       |      |       |       |
|------|------|------|-------|-------|-------|------|-------|-------|
| 6.72 | 6.12 | 5.7  | 8.69  | 6.56  | 8.03  | 7.12 | 5.31  | 9.46  |
| 8.06 | 5.97 | 7.37 | 7.78  | 7.58  | 8.1   | 8.04 | 6.74  | 8.96  |
| 7.44 | 6.03 | 6.59 | 8.37  | 6.51  | 7.4   | 6.34 | 5.29  | 9.15  |
| 6.73 | 8.1  | 5.5  | 9.3   | 7.04  | 8.77  | 6.18 | 6.87  | 9.22  |
| 6.62 | 7.52 | 5.35 | 8.68  | 7.28  | 8.3   | 6.32 | 4.81  | 8.94  |
| 6.82 | 7.13 | 6.29 | 9.92  | 6.65  | 8.41  | 5.62 | 6.26  | 8.66  |
| 6.23 | 7.36 | 3.8  | 9.91  | 6.26  | 9.24  | 4.41 | 6.96  | 10.2  |
| 7    | 7.82 | 3.76 | 10.4  | 6.22  | 8.94  | 4.89 | 6.68  | 9.98  |
| 7.74 | 7.62 | 7.45 | 8.66  | 8.85  | 8.76  | 5.95 | 9.46  | 9.84  |
| 6.35 | 6.22 | 6.04 | 8.79  | 7.33  | 8.14  | 5.04 | 1.79  | 10.26 |
| 5.88 | 5.66 | 4.88 | 9.08  | 6.47  | 9.42  | 4.49 | 5.62  | 10.83 |
| 7.14 | 5.18 | 5.7  | 8.78  | 6.74  | 8.56  | 6.58 | 5.02  | 9.89  |
| 6.85 | 7.69 | 6.96 | 8.17  | 8.99  | 8.92  | 5.72 | 7.07  | 10.25 |
| 9.47 | 0.79 | 8.69 | 7.67  | 8.95  | 9.25  | 9.93 | 7.92  | 7.9   |
| 7.46 | 7.2  | 4.53 | 9.98  | 7.1   | 10.24 | 6.23 | 3.85  | 9     |
| 7.26 | 6.59 | 3.16 | 10.19 | 6.45  | 10.3  | 5.42 | 3.42  | 9.2   |
| 6.93 | 6.09 | 4.33 | 9.82  | 6.84  | 9.96  | 5.82 | 3.84  | 9.07  |
| 6.18 | 7.39 | 5.27 | 9.29  | 6.64  | 8.28  | 4.6  | 3.24  | 8.75  |
| 6.8  | 7.42 | 5.96 | 8.32  | 6.58  | 7.84  | 6.5  | 5.19  | 8.21  |
| 7.02 | 7.46 | 5.6  | 8.77  | 6.61  | 7.81  | 6.23 | 4.48  | 8.55  |
| 8.97 | 5.16 | 9.25 | 5.16  | 11.35 | 6.16  | 6.75 | 11.23 | 7.49  |
| 6.13 | 6.1  | 2.94 | 10.01 | 6.83  | 7.77  | 4.66 | 5.98  | 9.07  |
| 6.18 | 6.6  | 5.06 | 9.34  | 6.84  | 7.52  | 4.44 | 5.58  | 8.71  |
| 5.35 | 6.47 | 4.18 | 8.94  | 7.99  | 9.15  | 4.35 | 6.7   | 8.56  |
| 5.81 | 6.88 | 5.86 | 8.62  | 8.37  | 8.96  | 5.49 | 5.23  | 8.45  |
| 6.88 | 8.3  | 6.07 | 8.93  | 7.23  | 8.1   | 5.67 | 7.07  | 8.2   |
| 8.18 | 1    | 8.3  | 7.02  | 8.15  | 8.43  | 8.44 | 6.55  | 7.32  |
| 8.21 | 2.86 | 8.25 | 6.92  | 8.34  | 8.67  | 8.48 | 6.83  | 7.14  |
| 7.35 | 1.77 | 7.41 | 6.72  | 8.23  | 8.88  | 8.28 | 6.35  | 6.63  |
| 6.22 | 6.61 | 4.01 | 7.99  | 5.53  | 7.12  | 5.18 | 1.59  | 8.17  |
| 6.47 | 7.88 | 3.76 | 8.31  | 6.16  | 6.78  | 5.26 | 2.76  | 7.38  |
| 6.04 | 5.75 | 3.57 | 8.31  | 6.5   | 7.31  | 4.75 | 3.28  | 8.02  |
| 7.62 | 7.44 | 4.86 | 8.1   | 6.28  | 6.42  | 6.16 | 0.16  | 7.33  |
| 7.36 | 1.45 | 7.25 | 6.18  | 7.08  | 8.07  | 7.8  | 6.01  | 6.6   |
| 7.07 | 1.25 | 6.64 | 6.61  | 6.27  | 8.02  | 7.5  | 5.95  | 6.16  |
| 7.33 | 1.93 | 7.06 | 7.32  | 6.74  | 8.08  | 7.35 | 6.4   | 6.98  |
| 8.32 | 0    | 7.71 | 7.14  | 7.42  | 8.2   | 8.36 | 7.14  | 7.62  |
| 7.36 | 1.34 | 7.24 | 6.76  | 7.34  | 7.99  | 7.6  | 5.58  | 6.09  |
| 7.27 | 2.1  | 6.93 | 6.35  | 6.71  | 8.26  | 7.65 | 5.74  | 6.23  |
| 7.06 | 0.31 | 6.68 | 6.67  | 7.01  | 8.03  | 7.62 | 5.63  | 6.61  |
| 7.8  | 3.41 | 6.58 | 6.32  | 7.5   | 6.5   | 8.17 | 8.11  | 8.73  |
| 7.88 | 1.06 | 8.32 | 7.46  | 8.25  | 8.79  | 8.77 | 6.73  | 7.08  |
| 8.52 | 0    | 8.25 | 7.62  | 8.58  | 9.28  | 8.88 | 6.92  | 7.61  |
| 7.54 | 2.87 | 7.48 | 8.9   | 7.73  | 8.58  | 7.79 | 7.19  | 7.55  |
| 7.98 | 0.75 | 7.77 | 7.88  | 7.99  | 8.86  | 8.41 | 7.43  | 7.45  |
| 7.48 | 3.69 | 7.7  | 8.08  | 7.75  | 8.81  | 8.04 | 6.84  | 7.21  |
| 7.95 | 2.88 | 8.28 | 7.5   | 8.09  | 9.1   | 8.49 | 7.21  | 6.83  |
| 7.49 | 0.71 | 7.45 | 7.12  | 7.71  | 9.26  | 8.29 | 7.01  | 7.03  |
| 8.32 | 0.9  | 8.44 | 7.66  | 8.09  | 8.91  | 8.69 | 7.62  | 8.02  |
| 6.63 | 4.82 | 5.04 | 8.74  | 6.22  | 9.11  | 6.99 | 5.64  | 8.5   |
| 6.88 | 6.1  | 4.95 | 9.33  | 5.95  | 9.72  | 6.59 | 5.72  | 8.54  |
| 7.31 | 6.04 | 6.36 | 9.4   | 6.8   | 9.63  | 7.23 | 6.46  | 8.35  |

<https://mc.manuscriptcentral.com/gut>

|    |      |      |      |       |       |       |      |      |       |
|----|------|------|------|-------|-------|-------|------|------|-------|
| 1  |      |      |      |       |       |       |      |      |       |
| 2  | 7.44 | 5.02 | 6.7  | 9.13  | 6.74  | 9.56  | 7.44 | 6.02 | 8.27  |
| 3  | 7.39 | 6.93 | 6.4  | 9.33  | 8.05  | 9.2   | 7.24 | 7.23 | 9.91  |
| 4  | 7.26 | 7.81 | 6.77 | 9.45  | 8.3   | 9.63  | 7.48 | 7.26 | 10.2  |
| 5  | 7.4  | 6.3  | 6.44 | 9.61  | 7.76  | 9.2   | 7.54 | 7.46 | 10.18 |
| 6  | 7.22 | 6.2  | 6.35 | 9.53  | 7.7   | 9.29  | 7.34 | 7.51 | 10.19 |
| 7  | 8.06 | 5.55 | 6.55 | 9.18  | 7.32  | 8.66  | 7.25 | 6.78 | 9.68  |
| 8  | 7.72 | 6.65 | 6.01 | 9.98  | 7.94  | 9.18  | 6.46 | 7.35 | 10.01 |
| 9  | 7.9  | 6.19 | 5.44 | 10.3  | 7.32  | 9.31  | 5.71 | 7.09 | 9.98  |
| 10 | 7.39 | 6.74 | 6.93 | 9.1   | 8.3   | 8.76  | 6.5  | 7.55 | 9.75  |
| 11 | 7.93 | 7.63 | 5.72 | 10.36 | 7.83  | 9.03  | 6.74 | 4.85 | 10.52 |
| 12 | 7.33 | 7.31 | 6.27 | 9.92  | 7.73  | 9.23  | 6.78 | 5.63 | 10.79 |
| 13 | 7.37 | 7.82 | 6.22 | 9.85  | 7.74  | 9.56  | 6.49 | 4.29 | 10.92 |
| 14 | 7.32 | 7.25 | 5.68 | 10.2  | 7.68  | 9.25  | 6.17 | 4.71 | 11.01 |
| 15 | 6.65 | 5.48 | 5.97 | 9.32  | 6.53  | 8.47  | 6.53 | 4.61 | 8.27  |
| 16 | 5.21 | 6.77 | 4.21 | 10.12 | 6.03  | 9.27  | 4.76 | 2.51 | 9.04  |
| 17 | 6.79 | 7.15 | 6.43 | 8.52  | 7.73  | 7.8   | 6.77 | 5.15 | 8.37  |
| 18 | 6.28 | 7.29 | 6.12 | 8.78  | 6.5   | 7.52  | 6.04 | 2.32 | 8.26  |
| 19 | 5.8  | 7.83 | 4.13 | 9.73  | 6.31  | 9.48  | 5.19 | 0.67 | 9.72  |
| 20 | 6.35 | 8.21 | 5.1  | 9.31  | 6.82  | 8.67  | 6.22 | 3.69 | 9.19  |
| 21 | 6.72 | 5.68 | 5.54 | 9.55  | 6     | 7.96  | 5.14 | 2.93 | 9.79  |
| 22 | 7.03 | 8.34 | 3.35 | 10.32 | 6.65  | 9.89  | 4.97 | 3.13 | 10.21 |
| 23 | 6.09 | 6.57 | 3.06 | 9.82  | 6.69  | 9.84  | 3.94 | 1.48 | 10.57 |
| 24 | 7.39 | 5.91 | 6.86 | 7.75  | 7.85  | 8.17  | 7.15 | 5.5  | 8.79  |
| 25 | 6.91 | 5.84 | 6.66 | 7.97  | 8.17  | 8.38  | 6.86 | 5.18 | 9.39  |
| 26 | 8.44 | 5.47 | 6.47 | 7.32  | 10.14 | 7.54  | 7.79 | 7.54 | 8.74  |
| 27 | 4.89 | 4.82 | 4.61 | 8.58  | 5.68  | 8     | 4.36 | 4.06 | 6.99  |
| 28 | 6.22 | 5.55 | 5.11 | 8.43  | 5.65  | 8.66  | 5.04 | 5.38 | 7.85  |
| 29 | 6.51 | 5.91 | 4.93 | 9.46  | 5.44  | 9.76  | 4.52 | 5.44 | 8.01  |
| 30 | 4.71 | 5.9  | 2.9  | 9.33  | 4.9   | 9.63  | 4.71 | 4.71 | 7.6   |
| 31 | 7.34 | 1.76 | 7.01 | 5.85  | 6.89  | 7.57  | 7.54 | 5.85 | 6.08  |
| 32 | 7.16 | 4.04 | 7    | 6.5   | 7.35  | 7.55  | 7.41 | 5.04 | 6.55  |
| 33 | 7.28 | 0.88 | 7.03 | 6.28  | 7.28  | 8.08  | 7.59 | 5.28 | 6.69  |
| 34 | 6.93 | 3.54 | 7.45 | 6.91  | 7.11  | 7.38  | 7.6  | 5.48 | 6.28  |
| 35 | 6.87 | 2.68 | 5.8  | 7.96  | 6.06  | 8     | 6.05 | 4    | 8.67  |
| 36 | 7.66 | 4.66 | 6.81 | 7.94  | 6.85  | 8.11  | 6.88 | 5.05 | 8.27  |
| 37 | 7.22 | 5.29 | 5.92 | 7.92  | 6.32  | 7.91  | 6.82 | 4.41 | 8.15  |
| 38 | 6.89 | 6.51 | 5.92 | 7.38  | 6.61  | 7.6   | 6.8  | 4.07 | 7.8   |
| 39 | 5.35 | 5    | 5.88 | 9.03  | 5.48  | 6.71  | 5.21 | 1.94 | 4.52  |
| 40 | 7.22 | 6.16 | 5.46 | 9.88  | 7.55  | 9.42  | 5.99 | 5.37 | 9.53  |
| 41 | 6.35 | 6.61 | 5.91 | 9.97  | 7.05  | 9.35  | 4.81 | 7.65 | 9.66  |
| 42 | 6.32 | 6.69 | 7.79 | 8.74  | 8.76  | 8.34  | 5.69 | 9.36 | 9.85  |
| 43 | 7.59 | 5.57 | 6.19 | 9.02  | 6.95  | 9.05  | 6.87 | 4.84 | 9.52  |
| 44 | 7.32 | 6.83 | 8.21 | 8.32  | 8.83  | 8.1   | 6.83 | 9.1  | 8.32  |
| 45 | 6.06 | 8.09 | 4.91 | 9.9   | 6.21  | 9.6   | 5.08 | 5.54 | 9.24  |
| 46 | 6.26 | 8.1  | 4.69 | 9.87  | 6.26  | 8.81  | 4.26 | 5.02 | 8.95  |
| 47 | 5.97 | 4.68 | 5    | 9.87  | 6.68  | 10.52 | 2.68 | 6.04 | 8.58  |
| 48 | 7.19 | 5.89 | 6.48 | 9.35  | 7.39  | 9.74  | 6.58 | 6.27 | 8.83  |
| 49 | 6.18 | 5.89 | 6.08 | 9.56  | 6.58  | 10.15 | 4.98 | 6.7  | 8.86  |
| 50 | 6.89 | 5.65 | 6.81 | 9.02  | 7.21  | 9.86  | 6.89 | 6.34 | 8.17  |
| 51 | 6.2  | 5.06 | 4.1  | 8.46  | 6.68  | 8     | 4.27 | 5.33 | 8.88  |
| 52 | 5.53 | 5.39 | 5.62 | 7.76  | 6.99  | 7.88  | 6.11 | 5.57 | 8.39  |
| 53 | 5.64 | 4.88 | 5.56 | 7.42  | 7.06  | 7.56  | 6.54 | 5.69 | 8.04  |

<https://mc.manuscriptcentral.com/gut>

|      |      |      |      |      |       |      |      |      |
|------|------|------|------|------|-------|------|------|------|
| 5.74 | 5.18 | 4.25 | 7.16 | 7.64 | 7.54  | 5.18 | 6.98 | 9.18 |
| 7.77 | 6.23 | 6.01 | 8.26 | 6.01 | 9.03  | 6.71 | 5.49 | 7.83 |
| 6.17 | 5.76 | 4.39 | 9.06 | 6.63 | 9.09  | 5.8  | 5.54 | 8.61 |
| 5.98 | 5.95 | 4.49 | 9.06 | 6.64 | 9.44  | 5.49 | 5.49 | 8.7  |
| 7.64 | 3.14 | 7.34 | 5.95 | 8.3  | 8.25  | 7.74 | 6.08 | 6.08 |
| 7.26 | 6.12 | 3.89 | 9.61 | 6.29 | 9.8   | 4.37 | 2.15 | 9.43 |
| 5.53 | 3.71 | 3.97 | 9.69 | 6.59 | 10.05 | 3.65 | 3.71 | 9.36 |
| 5.83 | 4.11 | 3.44 | 9.73 | 6.55 | 10.03 | 3.52 | 3.44 | 9.46 |
| 7.68 | 1.27 | 7.42 | 6.65 | 7.69 | 8.6   | 8.04 | 5.66 | 6.58 |
| 6.82 | 5.69 | 6.66 | 7.44 | 7.28 | 8.48  | 7.28 | 5.3  | 7.39 |
| 5.68 | 6.13 | 5.68 | 8.39 | 6.06 | 7.12  | 4.41 | 3.97 | 8.49 |
| 6.38 | 6.28 | 6.21 | 8.55 | 7.06 | 7.75  | 6.67 | 5.59 | 8.48 |
| 5.35 | 6.97 | 5.51 | 8.04 | 7.03 | 7.49  | 4.95 | 4.89 | 8.96 |
| 6.78 | 8.03 | 6.28 | 8.18 | 6.98 | 7.08  | 6.54 | 4.37 | 7.93 |
| 9.72 | 5.54 | 7.4  | 7.54 | 8.75 | 6.45  | 5.71 | 4.13 | 9.17 |
| 5.61 | 5.68 | 5.61 | 8.98 | 6.14 | 8.12  | 5.56 | 4.89 | 8.17 |
| 6.36 | 5.48 | 5.85 | 8.86 | 6.38 | 8.01  | 6.73 | 4.82 | 8.66 |
| 5.53 | 5.84 | 5.82 | 8.94 | 6.37 | 8.1   | 5.18 | 4.71 | 8.06 |

1  
2  
3  
4  
5  
6  
7  
8  
9  
10  
11  
12  
13  
14  
15  
16  
17  
18  
19  
20  
21  
22  
23  
24  
25  
26  
27  
28  
29  
30  
31  
32  
33  
34  
35  
36  
37  
38  
39  
40  
41  
42  
43  
44  
45  
46  
47  
48  
49  
50  
51  
52  
53  
54  
55  
56  
57  
58  
59  
60

| SP1  | SPARC | SPARCL1 | SPDEF | SPHK2 | SPINK5 | SPINT1 | SPOCK3 | SPP1  |
|------|-------|---------|-------|-------|--------|--------|--------|-------|
| 8.23 | 11.92 | 8.78    | 7.28  | 7.57  | 5.69   | 8.18   | 6.12   | 8.67  |
| 8.47 | 11.97 | 9.99    | 7.54  | 7.19  | 9.17   | 9.07   | 5.23   | 11.17 |
| 8.37 | 11.7  | 9.51    | 7.5   | 7.36  | 10.59  | 9.12   | 5.51   | 8.89  |
| 8.99 | 13.3  | 11.6    | 7.17  | 7.82  | 10.79  | 9.33   | 2.99   | 9.98  |
| 8.28 | 8.36  | 7.94    | 8.76  | 7.31  | 7.58   | 7.58   | 7.8    | 7.65  |
| 8.05 | 11.85 | 9.04    | 8.73  | 6.92  | 6.13   | 8.64   | 6.05   | 10.76 |
| 7.87 | 12.02 | 9       | 8.98  | 6.74  | 6.41   | 8.92   | 5.9    | 10.84 |
| 8.29 | 13.32 | 10.16   | 9.41  | 8.15  | 6.3    | 9.74   | 2.39   | 11.81 |
| 8.16 | 13.4  | 8.34    | 5.58  | 8.68  | 5.07   | 9.73   | 1.95   | 11.57 |
| 8.11 | 11.72 | 7.9     | 7.11  | 7.37  | 5.37   | 9      | 5.4    | 10.34 |
| 8.33 | 11.91 | 8.99    | 6.11  | 7.77  | 4.77   | 9.65   | 2.38   | 9.62  |
| 8.18 | 12.94 | 10.25   | 6.24  | 7.54  | 3.49   | 9.13   | 1.68   | 10.48 |
| 8.54 | 11.58 | 9.27    | 6.64  | 8.12  | 5.54   | 8.73   | 5.02   | 7.94  |
| 8.49 | 13.2  | 9.63    | 6.79  | 8.2   | 5.17   | 8.78   | 5.46   | 8.63  |
| 8.88 | 14.04 | 11.17   | 4.09  | 9.95  | 3.77   | 9.78   | 2.77   | 8.58  |
| 8.81 | 12.85 | 9.5     | 7.85  | 7.25  | 6.23   | 9.41   | 5.64   | 10.76 |
| 8.52 | 12.9  | 10.17   | 7.57  | 7.61  | 9.91   | 9.63   | 6.2    | 10.03 |
| 8.46 | 13.54 | 10.5    | 7.7   | 7.17  | 7.27   | 9.66   | 6.22   | 11.89 |
| 9.09 | 13.45 | 10.14   | 6.34  | 9.44  | 6.56   | 9.25   | 2.22   | 7.28  |
| 9.08 | 12.39 | 10.16   | 8.85  | 8.24  | 6.42   | 9.91   | 0.89   | 7.41  |
| 9.11 | 12.73 | 11.06   | 8.15  | 8.29  | 6.43   | 9.28   | 2.08   | 6.91  |
| 8.77 | 13.3  | 12.21   | 8.1   | 9.57  | 4.47   | 9.71   | 4.24   | 9.88  |
| 8.82 | 12.68 | 11.91   | 8.04  | 9.52  | 5.75   | 9.66   | 2.78   | 7.58  |
| 8.73 | 13.14 | 12.71   | 9.1   | 8.73  | 5.1    | 9.56   | 3.06   | 9.6   |
| 8.53 | 10.98 | 9.47    | 4.13  | 7.75  | 4.13   | 9.07   | 2.01   | 9.22  |
| 8.97 | 10.94 | 8.57    | 8.85  | 8.51  | 5.22   | 10.08  | 2.71   | 7.65  |
| 8.96 | 10.99 | 8.56    | 8.78  | 8.76  | 4.98   | 9.98   | 2.11   | 7.43  |
| 8.7  | 10.72 | 9.09    | 8.74  | 8.42  | 5.47   | 9.72   | 5.12   | 7.04  |
| 8.9  | 11.74 | 8.03    | 7.81  | 8.5   | 5.28   | 8.95   | 5.72   | 7.95  |
| 8.41 | 11.02 | 9.8     | 8.68  | 8.19  | 5.79   | 9.17   | 5.79   | 9.36  |
| 8.8  | 11.02 | 9.54    | 8.58  | 8.38  | 5.28   | 9.28   | 4.84   | 8.73  |
| 8.78 | 12.08 | 9.49    | 8.63  | 8.56  | 6.32   | 9.2    | 6.26   | 8.88  |
| 7.97 | 9.86  | 9.14    | 7.19  | 7.44  | 5.28   | 6.92   | 6.23   | 6.93  |
| 8.54 | 13.83 | 11.37   | 8.73  | 7.5   | 5.55   | 9.02   | 2.38   | 12.35 |
| 8.66 | 13    | 10.18   | 8.78  | 7.78  | 6.38   | 9.6    | 2.42   | 10.88 |
| 8.59 | 13.7  | 11.33   | 9.03  | 7.78  | 6.09   | 9.34   | 1.47   | 11.52 |
| 8.45 | 11.82 | 8.6     | 4.77  | 7.54  | 2.03   | 8.05   | 2.03   | 8.98  |
| 8.35 | 11.5  | 8.89    | 5.13  | 7.32  | 2.4    | 8.54   | 2.57   | 9.45  |
| 8.3  | 12.3  | 9.58    | 5.01  | 7.28  | 3.69   | 8.22   | 2.69   | 8.11  |
| 8.33 | 11.68 | 9.99    | 3.99  | 7.15  | 3.99   | 7.8    | 3.2    | 7.78  |
| 7.87 | 12    | 8.21    | 8.08  | 7.34  | 6.23   | 7.99   | 5.62   | 11.24 |
| 8.23 | 11.55 | 8.46    | 8.37  | 7.04  | 7.39   | 8.1    | 5.42   | 11.2  |
| 7.77 | 11.33 | 8.12    | 8.28  | 6.89  | 6.24   | 7.7    | 5.17   | 9.53  |
| 8.07 | 11.81 | 7.66    | 8.53  | 7.15  | 6.4    | 8.12   | 4.72   | 9.98  |
| 7.86 | 11.77 | 7.99    | 2.86  | 10.29 | 4.45   | 9.83   | 4.86   | 10.71 |
| 8.35 | 11.06 | 9.9     | 8.04  | 7.9   | 5.48   | 8.21   | 0.31   | 6.99  |
| 8.34 | 12.2  | 10.17   | 6.96  | 7.79  | 4.91   | 8.2    | 2.32   | 7.87  |
| 8.42 | 13.22 | 11.38   | 6.68  | 7.68  | 4.45   | 7.52   | 2.13   | 8.02  |
| 9    | 12.93 | 10.14   | 4.63  | 8.61  | 4.44   | 10.04  | 2.22   | 10.84 |
| 9.09 | 13.28 | 10.19   | 4.4   | 8.19  | 4.96   | 9.81   | 2.59   | 11.17 |
| 9.33 | 12.22 | 9.67    | 6.11  | 8.16  | 6.45   | 9.79   | 1.5    | 10.48 |

<https://mc.manuscriptcentral.com/gut>

|    |      |       |       |       |      |      |       |      |       |
|----|------|-------|-------|-------|------|------|-------|------|-------|
| 1  |      |       |       |       |      |      |       |      |       |
| 2  | 9.19 | 13.54 | 10.89 | 5.21  | 7.89 | 5.21 | 9.56  | 3.08 | 10.48 |
| 3  | 8.57 | 12.11 | 7.84  | 7.13  | 8.8  | 5.49 | 9.52  | 4.94 | 10.47 |
| 4  | 8.46 | 11.78 | 9.14  | 7.21  | 8.77 | 5.83 | 9.47  | 5.14 | 9.54  |
| 5  | 8.63 | 11.53 | 8.77  | 6.95  | 8.84 | 5.79 | 9.98  | 4.65 | 9.35  |
| 6  | 8.5  | 11.74 | 9.81  | 7.05  | 8.59 | 5.72 | 9.51  | 5.01 | 10.28 |
| 7  | 9.59 | 12.27 | 9.84  | 5.48  | 8.14 | 3.81 | 9.7   | 3.81 | 8.53  |
| 8  | 9.5  | 12.27 | 10.48 | 7.28  | 7.86 | 4.05 | 10.5  | 2.25 | 9.03  |
| 9  | 9.61 | 11.67 | 9.03  | 6.88  | 7.97 | 3.53 | 10.68 | 1.32 | 7.65  |
| 10 | 9.3  | 12.43 | 11.41 | 7.83  | 8.55 | 2.44 | 10.44 | 2.02 | 9.42  |
| 11 | 8.66 | 11.51 | 8.54  | 3.97  | 7.86 | 7.88 | 10    | 0.58 | 9.94  |
| 12 | 8.85 | 11.31 | 9.2   | 6.21  | 8.01 | 6.65 | 10.25 | 3.13 | 9.02  |
| 13 | 9.01 | 11.24 | 8.84  | 5.31  | 8.09 | 6.96 | 10.14 | 1.4  | 9.6   |
| 14 | 8.96 | 11.45 | 10.03 | 4.5   | 7.8  | 6.49 | 10.07 | 2.3  | 9.35  |
| 15 | 7.47 | 10.28 | 8.47  | 11.64 | 9.06 | 6.15 | 6.15  | 6.15 | 10.28 |
| 16 | 8.67 | 12.41 | 8.73  | 9.17  | 8.67 | 4.49 | 9.21  | 6.49 | 11.41 |
| 17 | 8.72 | 11.7  | 8.72  | 8.43  | 7.94 | 5.58 | 8.87  | 6.67 | 11.06 |
| 18 | 8.09 | 9.57  | 8.86  | 10.02 | 8.64 | 6.93 | 8.12  | 8.87 | 9.3   |
| 19 | 7.91 | 9.7   | 8.76  | 9.98  | 8.46 | 6.8  | 7.93  | 8.43 | 8.85  |
| 20 | 8.65 | 10.83 | 7.85  | 6.25  | 7.11 | 5.09 | 9.98  | 5.46 | 7.24  |
| 21 | 8.82 | 10.23 | 7.31  | 6.43  | 7.22 | 4.93 | 10.22 | 5.45 | 7.94  |
| 22 | 8.83 | 11.07 | 8.25  | 6.93  | 7.41 | 5.13 | 9.81  | 5.84 | 7.49  |
| 23 | 9.56 | 12.38 | 11.61 | 4.42  | 7.54 | 8.66 | 10.35 | 2.27 | 8.95  |
| 24 | 9.57 | 11.77 | 11.62 | 6.79  | 7.49 | 8.09 | 9.87  | 5.19 | 9.33  |
| 25 | 9.29 | 11.91 | 11.62 | 6.78  | 7.57 | 7.16 | 9.34  | 6.41 | 8.06  |
| 26 | 8.83 | 12.2  | 10.03 | 8.28  | 7.99 | 4.72 | 10.74 | 3.64 | 11.01 |
| 27 | 8.83 | 13.06 | 10.04 | 8.1   | 7.89 | 3.63 | 11.04 | 4.29 | 12.14 |
| 28 | 8.86 | 13.09 | 9.96  | 7.68  | 7.76 | 3.01 | 11.01 | 5.33 | 13.05 |
| 29 | 8.44 | 11.56 | 8.81  | 7.45  | 8.26 | 6.31 | 8.71  | 5.53 | 9.56  |
| 30 | 8.51 | 11.94 | 9.35  | 6.87  | 8.15 | 6.13 | 8.57  | 5.62 | 10.48 |
| 31 | 8.46 | 11.68 | 9.28  | 6.88  | 8.16 | 6.42 | 8.58  | 5.91 | 9.85  |
| 32 | 8.43 | 12.41 | 9.84  | 7.05  | 8.18 | 6.07 | 9.95  | 6.27 | 8.63  |
| 33 | 8.53 | 11.48 | 9.26  | 7.28  | 8.54 | 5.37 | 10.26 | 6.31 | 8.99  |
| 34 | 8.63 | 11.6  | 8.51  | 7.49  | 8.61 | 6.26 | 10.34 | 6.47 | 8.72  |
| 35 | 8.73 | 12.6  | 10.34 | 7     | 7.01 | 5.4  | 8.81  | 5.51 | 11.48 |
| 36 | 8.62 | 12.35 | 9.79  | 7.46  | 7.32 | 5.94 | 9.18  | 5.66 | 10.85 |
| 37 | 8.71 | 13.54 | 10.64 | 7.4   | 7.46 | 5.85 | 8.96  | 6.19 | 12.13 |
| 38 | 8.16 | 12.02 | 9.98  | 7.08  | 7.52 | 6.05 | 8.65  | 5.93 | 9.89  |
| 39 | 8.16 | 12.02 | 9.98  | 7.08  | 7.52 | 6.05 | 8.65  | 5.93 | 9.89  |
| 40 | 8.77 | 11.13 | 11.01 | 7.84  | 7.46 | 6.08 | 9.26  | 6.22 | 9.74  |
| 41 | 8.78 | 12.05 | 11.38 | 7.45  | 7.24 | 6.39 | 9.06  | 6.13 | 10.25 |
| 42 | 8.78 | 13.19 | 11.21 | 7.25  | 7.34 | 6.29 | 9.25  | 6.27 | 10.93 |
| 43 | 8.25 | 10.25 | 8.35  | 7.23  | 7.77 | 6.82 | 8.61  | 7.36 | 7.67  |
| 44 | 8.34 | 12.02 | 10.15 | 6.94  | 8.69 | 6.36 | 10.09 | 5.66 | 9.01  |
| 45 | 8.53 | 11.95 | 9.51  | 7.1   | 8.27 | 6.08 | 10.31 | 5.56 | 8     |
| 46 | 8.33 | 11.95 | 10.79 | 7.1   | 8.33 | 6.2  | 9.44  | 6.82 | 7.84  |
| 47 | 8.67 | 12.75 | 10.25 | 3.98  | 8.49 | 4.98 | 9.38  | 1.73 | 7.92  |
| 48 | 8.8  | 12.01 | 9.05  | 4.83  | 8.38 | 4.78 | 9.77  | 1.08 | 5.8   |
| 49 | 8.96 | 13.65 | 9.84  | 4.22  | 8.95 | 3.98 | 9.36  | 2.84 | 8.31  |
| 50 | 8.25 | 11.28 | 8.97  | 7.23  | 7.3  | 6.53 | 8.02  | 6.8  | 7.46  |
| 51 | 8.39 | 12.8  | 11.13 | 7.51  | 7.62 | 6.35 | 8.08  | 6.49 | 8.73  |
| 52 | 8.48 | 12.35 | 11.68 | 6.56  | 7.11 | 5.92 | 8.28  | 6.41 | 9.35  |
| 53 | 8.12 | 11.7  | 9.14  | 7.08  | 7.11 | 6.63 | 7.86  | 6.3  | 9.3   |

<https://mc.manuscriptcentral.com/gut>



1  
2  
3  
4  
5  
6  
7  
8  
9  
10  
11  
12  
13  
14  
15  
16  
17  
18  
19  
20  
21  
22  
23  
24  
25  
26  
27  
28  
29  
30  
31  
32  
33  
34  
35  
36  
37  
38  
39  
40  
41  
42  
43  
44  
45  
46  
47  
48  
49  
50  
51  
52  
53  
54  
55  
56  
57  
58  
59  
60

|      |       |       |       |       |       |       |      |       |
|------|-------|-------|-------|-------|-------|-------|------|-------|
| 8.17 | 12.2  | 9.6   | 7.25  | 6.84  | 6.43  | 8.1   | 6.31 | 9.41  |
| 7.99 | 12.96 | 10.29 | 7.8   | 7.47  | 7.09  | 7.76  | 7.44 | 9.79  |
| 8.19 | 11.93 | 9.56  | 8.45  | 7.73  | 5.08  | 8.49  | 5.77 | 8.55  |
| 8.73 | 12.75 | 10.89 | 8.44  | 8.57  | 11.45 | 10.27 | 4.6  | 10.62 |
| 8.7  | 13.88 | 11.7  | 8.38  | 8.59  | 3.3   | 9.62  | 4.08 | 12.18 |
| 8.57 | 13.19 | 10.42 | 5.36  | 7.71  | 2.73  | 9.47  | 1.99 | 9.7   |
| 7.73 | 12.45 | 9     | 7.83  | 7     | 3.64  | 9.71  | 1.55 | 12.43 |
| 8.11 | 12.61 | 9.96  | 7.13  | 7.17  | 2.93  | 9.89  | 2.08 | 12.27 |
| 8.45 | 14.47 | 12.18 | 8.08  | 9.52  | 3.49  | 10.48 | 2.49 | 14.03 |
| 8.32 | 13.26 | 8.9   | 7.73  | 9.59  | 3.96  | 9.88  | 2.38 | 10.88 |
| 8.56 | 11.55 | 9.35  | 8.98  | 9.14  | 3.81  | 9.62  | 0.49 | 9.19  |
| 8    | 10.48 | 8.2   | 7.96  | 8.2   | 5.32  | 8.88  | 6.1  | 8.95  |
| 8.67 | 14.59 | 10.19 | 8.8   | 10.72 | 4.26  | 10.05 | 3.26 | 12.15 |
| 8.59 | 7.74  | 7.95  | 8.31  | 8.88  | 6.49  | 8.12  | 7.18 | 7.47  |
| 8.43 | 12.27 | 8.74  | 6.08  | 8.56  | 2.75  | 9.51  | 2.95 | 9.82  |
| 8.52 | 11.83 | 8.35  | 7.21  | 8.43  | 2.42  | 9.64  | 2.16 | 7.58  |
| 8.49 | 11.91 | 9.41  | 7.13  | 8.44  | 2.33  | 9.71  | 3.1  | 10.27 |
| 8.73 | 12.64 | 9.03  | 6.31  | 7.39  | 3.43  | 10.53 | 1.76 | 7.85  |
| 8.28 | 12.72 | 8.53  | 7.03  | 6.61  | 4.98  | 9.79  | 6.17 | 9.04  |
| 8.4  | 12.64 | 9.29  | 6.48  | 6.9   | 3.72  | 10.04 | 5.48 | 10.02 |
| 7.16 | 13.43 | 8.62  | 10.12 | 12.98 | 5.16  | 9.86  | 5.16 | 8.75  |
| 8.24 | 10.99 | 8.15  | 7.02  | 8.95  | 4.75  | 10.7  | 2.83 | 7.74  |
| 8.19 | 11.55 | 9.12  | 6.74  | 8.73  | 3.86  | 10.34 | 2.54 | 6.64  |
| 8.81 | 12.68 | 11.4  | 5.5   | 9.57  | 7.27  | 10.31 | 1.18 | 9.03  |
| 8.96 | 13.56 | 11.49 | 5.99  | 9.91  | 6.71  | 10.22 | 1.91 | 8.32  |
| 8.71 | 14.77 | 11.54 | 3.35  | 8.63  | 6.16  | 9.38  | 1.54 | 9.42  |
| 8.23 | 9.71  | 8.09  | 8.66  | 7.7   | 6.64  | 7.66  | 7.37 | 8.25  |
| 8.29 | 7.67  | 8.2   | 8.52  | 7.87  | 6.9   | 7.54  | 7.54 | 8.01  |
| 8.26 | 7.5   | 8.12  | 7.92  | 7.32  | 7.09  | 7.23  | 7.72 | 7.65  |
| 7.24 | 12.89 | 9.54  | 4.53  | 6.68  | 2.01  | 8.37  | 2.33 | 8.4   |
| 7.71 | 13.56 | 11.41 | 5.4   | 6.53  | 0.59  | 7.27  | 2.18 | 9.3   |
| 7.55 | 12.6  | 10.9  | 7.04  | 7.43  | 2.11  | 8.62  | 0.11 | 7.48  |
| 7.76 | 13.82 | 11.43 | 4.8   | 6.55  | 0.16  | 7.03  | 2.16 | 8.86  |
| 7.7  | 9.13  | 7.52  | 7.63  | 7.6   | 6.26  | 7.17  | 6.75 | 7.51  |
| 7.37 | 8.51  | 7.38  | 7.01  | 7.1   | 6.03  | 6.82  | 6.54 | 6.87  |
| 7.14 | 9.16  | 7.17  | 7.02  | 7.08  | 5.85  | 7.14  | 6.25 | 6.67  |
| 7.42 | 7.78  | 7.8   | 8.41  | 7.27  | 6.13  | 6.61  | 7.46 | 7.51  |
| 7.51 | 8.02  | 7.51  | 7.53  | 6.62  | 6.79  | 6.89  | 6.79 | 7.54  |
| 7.65 | 9     | 7.7   | 8.02  | 7.16  | 6.1   | 7.18  | 6.83 | 6.83  |
| 7.46 | 9.54  | 7.86  | 8.19  | 6.82  | 6.46  | 6.67  | 6.95 | 7.26  |
| 5.41 | 8.87  | 6.73  | 9.79  | 4     | 2.41  | 5.22  | 7.17 | 7.22  |
| 8.4  | 8.91  | 7.8   | 8.32  | 8.13  | 6.91  | 8.17  | 7.55 | 8.04  |
| 8.65 | 7.77  | 8.64  | 8.63  | 8.75  | 7.57  | 8.06  | 7.86 | 8.2   |
| 8.35 | 10.27 | 7.8   | 8.22  | 8.7   | 6.48  | 9.8   | 6.91 | 7.9   |
| 8.21 | 9.24  | 8.09  | 8.4   | 8.49  | 7.2   | 8.46  | 7.46 | 8.25  |
| 8.12 | 10.91 | 8.74  | 8.12  | 7.83  | 6.15  | 8.48  | 6.62 | 9.73  |
| 8.43 | 9.75  | 8.66  | 8.76  | 7.95  | 6.72  | 8.21  | 7.24 | 8.72  |
| 8.67 | 6.9   | 7.78  | 8.28  | 7.26  | 6.73  | 7.68  | 7.47 | 7.54  |
| 8.09 | 10.33 | 8.58  | 8.76  | 7.7   | 6.79  | 7.76  | 8.01 | 8.45  |
| 8.07 | 10.73 | 7.8   | 5.58  | 6.87  | 6.02  | 8.28  | 5.89 | 11.39 |
| 8.09 | 11.6  | 8.12  | 5.27  | 6.89  | 5.79  | 8.6   | 5.72 | 11.91 |
| 8    | 11.41 | 8.58  | 6.39  | 7.43  | 5.79  | 8.48  | 5.82 | 11.96 |

<https://mc.manuscriptcentral.com/gut>

1  
2  
3  
4  
5  
6  
7  
8  
9  
10  
11  
12  
13  
14  
15  
16  
17  
18  
19  
20  
21  
22  
23  
24  
25  
26  
27  
28  
29  
30  
31  
32  
33  
34  
35  
36  
37  
38  
39  
40  
41  
42  
43  
44  
45  
46  
47  
48  
49  
50  
51  
52  
53  
54  
55  
56  
57  
58  
59  
60

|      |       |       |       |       |      |       |      |       |
|------|-------|-------|-------|-------|------|-------|------|-------|
| 7.96 | 10.83 | 8.16  | 6.52  | 7.04  | 6.31 | 8.6   | 6    | 12.03 |
| 9.24 | 13.01 | 9.55  | 10.39 | 7.63  | 5.87 | 10.51 | 5.32 | 10    |
| 9.17 | 13.03 | 10.04 | 10.26 | 7.94  | 6.41 | 10.23 | 5.67 | 10.78 |
| 9.31 | 12.39 | 8.89  | 10.14 | 7.97  | 6.39 | 10.33 | 4.44 | 10.73 |
| 9.3  | 12.19 | 8.79  | 10.01 | 7.85  | 6.3  | 10.32 | 5.36 | 11.33 |
| 8.44 | 12.32 | 9.42  | 7.99  | 8.09  | 5.81 | 9.38  | 6.75 | 11.72 |
| 9.28 | 12.38 | 10.96 | 9.2   | 8.9   | 5.6  | 10.1  | 1.84 | 9.48  |
| 8.86 | 11.4  | 10.41 | 9.33  | 7.85  | 5.47 | 9.9   | 3.44 | 9.07  |
| 9.06 | 12.92 | 12.42 | 9.1   | 8.71  | 5.79 | 8.85  | 3.55 | 9.03  |
| 9.04 | 13.74 | 9.46  | 7.33  | 9.46  | 6.49 | 11.07 | 4.93 | 13.64 |
| 9.1  | 13.32 | 10.64 | 7.6   | 8.51  | 6.23 | 9.77  | 4.63 | 12.74 |
| 9    | 13.71 | 10.55 | 7.75  | 9.02  | 6.76 | 10.03 | 4.84 | 12.66 |
| 8.98 | 13.31 | 11.02 | 7.66  | 8.97  | 6.31 | 10.22 | 4.65 | 13.4  |
| 8.67 | 11.49 | 8.31  | 7.53  | 8.43  | 5.82 | 9.43  | 5.63 | 10.86 |
| 9.05 | 12.01 | 9.93  | 8.33  | 8.99  | 5.62 | 9.82  | 0.51 | 12.57 |
| 8.47 | 13.26 | 12.15 | 7.05  | 8.65  | 6.27 | 8.8   | 5.7  | 12.11 |
| 8.76 | 12.73 | 10.54 | 5.72  | 7.21  | 4.64 | 8.25  | 4.17 | 10.05 |
| 8.76 | 13.2  | 10.5  | 8.2   | 7.41  | 5.37 | 9.3   | 2.99 | 11.49 |
| 8.7  | 13.91 | 12.51 | 7.22  | 7.04  | 5.47 | 8.87  | 0.52 | 12.03 |
| 8.67 | 11.89 | 9.37  | 4.74  | 7.35  | 5.36 | 8.9   | 0.93 | 9.83  |
| 8.52 | 13.29 | 8.69  | 4.19  | 7.58  | 3.35 | 9.7   | 2.13 | 9.31  |
| 8.31 | 11.72 | 8.07  | 3.48  | 8.17  | 1.48 | 10.25 | 1.06 | 8.07  |
| 8.37 | 11.87 | 10.56 | 9.32  | 7.99  | 6.28 | 9.3   | 5.43 | 8.79  |
| 8.52 | 12.09 | 10.1  | 9     | 8.25  | 6.54 | 9.67  | 4.74 | 9.71  |
| 8.67 | 13.67 | 12.9  | 10.18 | 10.12 | 6.61 | 10.5  | 4.74 | 10.52 |
| 6.95 | 10.96 | 8.69  | 2.36  | 7.82  | 3.53 | 7.17  | 0.36 | 8.23  |
| 6.86 | 10.52 | 10    | 7.13  | 7.27  | 3.79 | 7.94  | 4.38 | 9.06  |
| 6.89 | 11.28 | 8.54  | 4.81  | 7.84  | 4.09 | 8.08  | 3.22 | 9.95  |
| 7.9  | 10.73 | 11.4  | 5.48  | 7.92  | 3.9  | 7.81  | 1.9  | 8.29  |
| 7.01 | 7.64  | 7.01  | 7.43  | 6.4   | 5.46 | 6.71  | 6.28 | 6.71  |
| 7.38 | 10.69 | 7.15  | 7.13  | 6.95  | 6.33 | 7     | 6.08 | 7.96  |
| 7.61 | 6.53  | 6.91  | 7.38  | 6.59  | 6.56 | 7.03  | 6.69 | 7.11  |
| 7.5  | 8.65  | 7.2   | 7.17  | 6.68  | 6.04 | 6.51  | 6.35 | 7.51  |
| 7.37 | 10.43 | 7.4   | 7.59  | 6.14  | 5.03 | 8.78  | 4.68 | 9.45  |
| 7.85 | 9.87  | 8.59  | 7.12  | 6.94  | 5.28 | 8.14  | 5.93 | 6.67  |
| 7.44 | 10.76 | 9.13  | 7.09  | 6.38  | 5.32 | 8.18  | 5.23 | 7.94  |
| 7.42 | 12.59 | 9.61  | 6.6   | 6.07  | 4.63 | 8.37  | 5.45 | 7.95  |
| 8.45 | 10.41 | 9.34  | 2.68  | 7.5   | 0.35 | 6.31  | 0.35 | 6.71  |
| 8.74 | 12.19 | 9.98  | 7.94  | 8.79  | 5.37 | 9.57  | 3.78 | 8.78  |
| 8.93 | 11.63 | 9.3   | 8.24  | 8.51  | 5.67 | 10.37 | 2.42 | 6.51  |
| 9.04 | 12.81 | 9.93  | 7.19  | 10.14 | 4.23 | 10.24 | 2.23 | 7.04  |
| 8.62 | 11.49 | 8.8   | 6.58  | 8.15  | 5.26 | 9.33  | 4.57 | 10.34 |
| 8.76 | 13.39 | 10.68 | 8.1   | 10.07 | 4.51 | 10    | 4.51 | 7.32  |
| 8.73 | 12.85 | 10.56 | 7.79  | 7.38  | 4.33 | 9.1   | 0    | 8.76  |
| 8.65 | 13.96 | 10.85 | 5.98  | 7.47  | 4.79 | 9.19  | 1.52 | 9.67  |
| 9.42 | 10.27 | 7.16  | 3.85  | 8.94  | 0.68 | 10.13 | 1.68 | 9.5   |
| 8.85 | 12.07 | 10.2  | 6.09  | 8.83  | 3.31 | 9.72  | 4.44 | 10.76 |
| 8.54 | 11.88 | 10.12 | 4.74  | 8.95  | 3.08 | 9.98  | 3.08 | 9.88  |
| 8.34 | 11.33 | 10.39 | 6.63  | 8.22  | 4.26 | 9.34  | 5.21 | 10.44 |
| 7.44 | 12.62 | 8.07  | 8.42  | 6.34  | 4.03 | 8.77  | 1.16 | 9.24  |
| 7.59 | 11.08 | 10.16 | 8.37  | 6.2   | 4.34 | 7.8   | 4.23 | 6.46  |
| 7.72 | 10.92 | 9.8   | 8.07  | 6.23  | 4.48 | 8.06  | 4.79 | 6.7   |

<https://mc.manuscriptcentral.com/gut>

1  
2  
3  
4  
5  
6  
7  
8  
9  
10  
11  
12  
13  
14  
15  
16  
17  
18  
19  
20  
21  
22  
23  
24  
25  
26  
27  
28  
29  
30  
31  
32  
33  
34  
35  
36  
37  
38  
39  
40  
41  
42  
43  
44  
45  
46  
47  
48  
49  
50  
51  
52  
53  
54  
55  
56  
57  
58  
59  
60

|      |       |       |      |      |      |       |      |       |
|------|-------|-------|------|------|------|-------|------|-------|
| 7.82 | 11.65 | 12.01 | 8.65 | 6.77 | 5.43 | 8.79  | 1.79 | 7.33  |
| 7.64 | 13.8  | 9.23  | 6.31 | 8.38 | 4.42 | 8.51  | 4.8  | 9.32  |
| 7.35 | 11.48 | 9     | 5.94 | 6.87 | 3.59 | 8.2   | 3.39 | 9.41  |
| 7.33 | 11.82 | 8.63  | 5.77 | 6.68 | 3.07 | 8.47  | 2.49 | 8.06  |
| 7.44 | 11.08 | 8.69  | 7.66 | 7.98 | 5.36 | 7.8   | 5.88 | 8.95  |
| 7.71 | 11.81 | 8.95  | 5.92 | 5.89 | 1.57 | 8.66  | 2.37 | 11.63 |
| 7.72 | 9.97  | 7.22  | 4.07 | 5.96 | 5    | 8.79  | 1.39 | 10.23 |
| 7.52 | 9.92  | 7.12  | 3.74 | 6.4  | 4.94 | 8.79  | 0.35 | 10.11 |
| 7.72 | 7.01  | 7.43  | 7.79 | 7.17 | 6.83 | 7.21  | 6.92 | 7.44  |
| 7.77 | 11.03 | 9.08  | 7.44 | 7.27 | 5.99 | 7.94  | 6.29 | 6.58  |
| 8.55 | 12.45 | 8.94  | 4.74 | 7.67 | 5.41 | 8.6   | 2.82 | 9.57  |
| 8.23 | 11.79 | 10.59 | 7.26 | 7.64 | 4.98 | 8.53  | 4.89 | 8.88  |
| 8.13 | 12.32 | 11.08 | 8.19 | 7.86 | 3.76 | 8.87  | 2.3  | 9.22  |
| 7.97 | 13.61 | 10.92 | 6.37 | 7.29 | 4.21 | 7.33  | 3.83 | 8.69  |
| 8.22 | 13.67 | 9.45  | 8.94 | 9.31 | 7.3  | 10.36 | 2.54 | 10.3  |
| 7.31 | 10.55 | 8.84  | 6.59 | 7.63 | 3.8  | 8.56  | 3.89 | 6.71  |
| 7.4  | 9.9   | 8.82  | 8.03 | 6.8  | 4.73 | 7.88  | 5.3  | 6.75  |
| 7.45 | 10.81 | 8.78  | 6.57 | 7.91 | 3.66 | 8.89  | 3.34 | 6.86  |

1  
2  
3  
4  
5  
6  
7  
8  
9  
10  
11  
12  
13  
14  
15  
16  
17  
18  
19  
20  
21  
22  
23  
24  
25  
26  
27  
28  
29  
30  
31  
32  
33  
34  
35  
36  
37  
38  
39  
40  
41  
42  
43  
44  
45  
46  
47  
48  
49  
50  
51  
52  
53  
54  
55  
56  
57  
58  
59  
60

| SRC   | SRF   | SRGN  | SRPK2 | SRPX2 | SSTR2 | ST14  | STAB1 | STAB2 |
|-------|-------|-------|-------|-------|-------|-------|-------|-------|
| 8.65  | 8.16  | 10.25 | 8.24  | 6.23  | 6.44  | 8.68  | 6.56  | 6.64  |
| 9.97  | 10.08 | 10.16 | 8.27  | 6.34  | 5.86  | 10.31 | 7.28  | 5.59  |
| 9.56  | 9.65  | 10.08 | 8.33  | 6.33  | 5.86  | 9.82  | 7.34  | 6.04  |
| 9.94  | 10.03 | 11.2  | 8.88  | 7.12  | 4.27  | 9.83  | 8.46  | 3.5   |
| 8.15  | 8.73  | 8.66  | 8.65  | 6.79  | 7.65  | 8.32  | 5.59  | 8     |
| 8.98  | 8.32  | 10.26 | 8.02  | 6.11  | 6.12  | 9.87  | 6.16  | 5.88  |
| 9.3   | 8.16  | 11.01 | 7.94  | 5.78  | 6.13  | 9.83  | 6.83  | 5.96  |
| 9.18  | 8.75  | 11.45 | 8.59  | 6.66  | 6.75  | 9.89  | 8.17  | 2.39  |
| 9.71  | 8.92  | 11.35 | 8.63  | 6.58  | 4.17  | 9.88  | 7.42  | 3.17  |
| 9.19  | 8.65  | 9.77  | 8.12  | 5.98  | 5.19  | 10.58 | 5.86  | 5.52  |
| 9.65  | 8.79  | 10.85 | 8.23  | 6.11  | 3.38  | 10.91 | 7.04  | 3.55  |
| 9.6   | 9.26  | 11.36 | 8.42  | 7.19  | 4.68  | 10.92 | 7.52  | 2.27  |
| 9.63  | 8.68  | 9.82  | 7.86  | 6.04  | 5.33  | 10.35 | 6.52  | 5.77  |
| 9.26  | 8.77  | 10.58 | 8.29  | 6.47  | 6.15  | 9.77  | 6.97  | 6.43  |
| 8.18  | 9.36  | 11.61 | 10.03 | 6.09  | 5.47  | 7.94  | 9.24  | 3.77  |
| 9.2   | 9.08  | 11.26 | 8.28  | 6.8   | 6.47  | 10.11 | 7.34  | 6.37  |
| 9.62  | 8.87  | 10.37 | 8.12  | 6.72  | 6.1   | 10.4  | 6.29  | 5.93  |
| 9.26  | 9.07  | 10.47 | 8.48  | 6.83  | 6.19  | 10.35 | 6.89  | 6.22  |
| 9.76  | 9     | 11.66 | 9.21  | 6.13  | 5.65  | 9.44  | 8.62  | 4.29  |
| 10.36 | 8.88  | 11.15 | 8.53  | 6.55  | 3.01  | 10.4  | 7.47  | 3.83  |
| 9.9   | 9.17  | 11.64 | 8.76  | 6.24  | 4.5   | 9.64  | 8.06  | 3.75  |
| 10.55 | 9.28  | 10.03 | 9.06  | 7.28  | 4.47  | 10.46 | 7.99  | 1.73  |
| 10.84 | 9.23  | 10.15 | 9.12  | 6.83  | 4.72  | 10.49 | 7.81  | 0.2   |
| 10.56 | 9.44  | 10.24 | 8.87  | 7.36  | 4.42  | 10.35 | 7.85  | 2.22  |
| 9.18  | 9.67  | 10.74 | 9     | 4.51  | 2.43  | 9.8   | 6.92  | 0.43  |
| 10.41 | 9.25  | 10.43 | 7.92  | 4.99  | 3.94  | 10.36 | 6.56  | 2.13  |
| 10.71 | 9.04  | 10.42 | 7.81  | 4.98  | 2.84  | 10.36 | 6.65  | 3.11  |
| 10.15 | 9.02  | 11.01 | 7.98  | 5.8   | 5.64  | 9.8   | 6.68  | 5.59  |
| 9.63  | 8.57  | 9.37  | 8.35  | 5.34  | 5.98  | 10.63 | 6.02  | 6.22  |
| 9.62  | 8.66  | 10.28 | 8.47  | 6.25  | 5.84  | 10.27 | 6.92  | 6     |
| 9.99  | 8.44  | 9.69  | 8.38  | 5.69  | 5.55  | 10.88 | 6.24  | 5.1   |
| 9.15  | 8.42  | 9.75  | 8.49  | 6.59  | 6.75  | 10.04 | 7.25  | 6.57  |
| 7.71  | 8.22  | 11.56 | 8.3   | 4.63  | 6.03  | 8.12  | 8.07  | 8.71  |
| 10.3  | 9.24  | 11.1  | 7.97  | 7.89  | 3.23  | 9.13  | 8.16  | 1.06  |
| 10.26 | 9.32  | 10.96 | 8     | 7.1   | 3.7   | 9.86  | 7.59  | 1.93  |
| 10.12 | 9.14  | 10.75 | 8.11  | 7.5   | 4.17  | 9.04  | 8.44  | 1.47  |
| 7.6   | 8.58  | 12.52 | 8.4   | 5.35  | 3.62  | 8.77  | 7.23  | 5.45  |
| 7.95  | 8.46  | 12.5  | 7.9   | 5.67  | 2.86  | 8.68  | 6.52  | 1.99  |
| 7.46  | 8.4   | 12.03 | 8.19  | 5.61  | 3.95  | 8.17  | 7.16  | 4.07  |
| 7.62  | 8.28  | 11.98 | 8.2   | 5.58  | 3.07  | 7.95  | 7.08  | 2.33  |
| 8.85  | 7.83  | 9.72  | 7.89  | 6.31  | 5.97  | 8.48  | 6.39  | 6.64  |
| 9.05  | 7.95  | 8.66  | 7.83  | 6.05  | 6.09  | 9.05  | 5.36  | 6.47  |
| 8.73  | 7.97  | 8.59  | 7.85  | 5.68  | 6.26  | 8.84  | 5.92  | 6.08  |
| 9.33  | 8.02  | 8.75  | 7.76  | 5.49  | 4.57  | 9.25  | 5.52  | 5.46  |
| 8.32  | 9.61  | 10.07 | 8.97  | 4.86  | 6.18  | 7.81  | 8.11  | 4.45  |
| 9.14  | 9.1   | 9.95  | 8.1   | 5.87  | 4.31  | 9.32  | 6.4   | 2.9   |
| 8.93  | 9.54  | 9.98  | 7.84  | 6.21  | 4.09  | 9.32  | 6.66  | 2     |
| 8.72  | 9.42  | 9.95  | 7.99  | 6.64  | 4.2   | 8.65  | 6.88  | 2.62  |
| 10.04 | 9.16  | 11.54 | 8.92  | 6.92  | 5.63  | 11.41 | 8.15  | 2.63  |
| 10.12 | 9.17  | 11.96 | 8.64  | 6.9   | 5.92  | 11.24 | 7.06  | 3.18  |
| 10.46 | 9.28  | 11.73 | 8.65  | 5.99  | 7.21  | 11.51 | 7.53  | 2.82  |

<https://mc.manuscriptcentral.com/gut>

|    |       |       |       |      |      |      |       |       |      |
|----|-------|-------|-------|------|------|------|-------|-------|------|
| 1  |       |       |       |      |      |      |       |       |      |
| 2  | 10.08 | 9.52  | 11.93 | 8.71 | 7.18 | 6.71 | 11.11 | 7.58  | 2.4  |
| 3  | 9.72  | 9.3   | 9.62  | 9.01 | 4.98 | 5.39 | 11.09 | 6.6   | 5.67 |
| 4  | 9.76  | 9.45  | 9.41  | 9.14 | 5.58 | 5.97 | 11.14 | 6.74  | 5.1  |
| 5  | 9.79  | 9.32  | 9.58  | 9.03 | 5.54 | 5.79 | 11.12 | 6.55  | 5.35 |
| 6  | 9.65  | 9.35  | 9.88  | 8.91 | 5.99 | 5.8  | 10.93 | 6.83  | 5.85 |
| 7  | 10.31 | 9.01  | 10.93 | 8.75 | 5.72 | 4.32 | 10.55 | 7.37  | 6.36 |
| 8  | 10.73 | 9.12  | 10.69 | 8.87 | 5.33 | 3.57 | 11.34 | 6.88  | 2.57 |
| 9  | 11.22 | 9.05  | 9.4   | 8.81 | 4.91 | 3.39 | 11.63 | 5.84  | 1.59 |
| 10 | 11.22 | 9.26  | 10.24 | 9.41 | 5.99 | 3.9  | 11.54 | 7.15  | 3.61 |
| 11 | 9.51  | 8.88  | 10.32 | 8.33 | 5.17 | 3.17 | 11.54 | 6.56  | 1.17 |
| 12 | 9.68  | 9.54  | 11.02 | 8.47 | 5.93 | 4    | 11.1  | 6.98  | 3.13 |
| 13 | 9.57  | 9.69  | 10.25 | 8.24 | 5.6  | 3.52 | 11.29 | 6.69  | 2.62 |
| 14 | 9.4   | 9.56  | 10.37 | 8    | 5.79 | 2.79 | 11.35 | 6.99  | 2.3  |
| 15 | 8.15  | 8.85  | 10.11 | 9.15 | 6.74 | 7.74 | 10.47 | 10.36 | 6.74 |
| 16 | 7.85  | 9.75  | 11.7  | 9.16 | 5.43 | 6.49 | 9.33  | 7.58  | 7.4  |
| 17 | 8.27  | 9.08  | 11.09 | 8.6  | 5.82 | 6.8  | 9.31  | 6.92  | 7.26 |
| 18 | 8.49  | 10.26 | 9.88  | 9.5  | 6    | 8.12 | 9.93  | 5.05  | 9.33 |
| 19 | 8.43  | 10.35 | 9.59  | 9.72 | 5.58 | 8.08 | 9.78  | 5.9   | 8.52 |
| 20 | 9.88  | 8.48  | 9.05  | 8.83 | 6.39 | 5.66 | 10.16 | 6.37  | 5.23 |
| 21 | 10.11 | 8.38  | 8.79  | 8.79 | 6.7  | 5.43 | 10.47 | 5.97  | 5.56 |
| 22 | 9.78  | 8.46  | 9.7   | 8.7  | 6.99 | 6.13 | 9.87  | 6.83  | 5.8  |
| 23 | 9.94  | 10.51 | 10.54 | 7.6  | 7.01 | 4.45 | 10.68 | 7.6   | 3.74 |
| 24 | 9.78  | 10.33 | 10.24 | 7.72 | 6.55 | 5.32 | 10.14 | 7.45  | 4.8  |
| 25 | 9.31  | 10.07 | 9.94  | 8.32 | 6.78 | 6.63 | 9.33  | 7.59  | 6.51 |
| 26 | 10.24 | 8.81  | 11.57 | 9.04 | 6.44 | 4.22 | 11.1  | 7.7   | 3.81 |
| 27 | 10.2  | 9.03  | 11.27 | 8.96 | 7.25 | 3.85 | 11.35 | 7.48  | 4.04 |
| 28 | 10.17 | 9.16  | 11.15 | 9.16 | 7.28 | 4.69 | 11.34 | 7.82  | 3.86 |
| 29 | 9.84  | 8.92  | 10.74 | 8.48 | 6.57 | 6.53 | 10.39 | 6.49  | 6.22 |
| 30 | 9.87  | 8.88  | 10.78 | 8.41 | 6.52 | 5.89 | 10.26 | 6.58  | 5.86 |
| 31 | 9.82  | 8.9   | 10.68 | 8.54 | 6.49 | 6.42 | 10.17 | 6.85  | 6.2  |
| 32 | 9.5   | 8.48  | 10.38 | 8.93 | 7.52 | 6.61 | 10.98 | 7.26  | 6.54 |
| 33 | 9.66  | 8.66  | 9.31  | 8.9  | 7.89 | 6.03 | 11.27 | 6.67  | 6.18 |
| 34 | 9.68  | 8.76  | 9.3   | 8.96 | 7.66 | 6.55 | 11.03 | 6.81  | 6.65 |
| 35 | 9.21  | 8.85  | 10.38 | 8.42 | 7.61 | 6.34 | 10.13 | 7.27  | 6.12 |
| 36 | 9.32  | 8.57  | 11.19 | 8.48 | 7.26 | 6.43 | 10.34 | 6.9   | 6.52 |
| 37 | 8.99  | 8.97  | 11.04 | 8.54 | 7.68 | 6.66 | 10.04 | 7.92  | 6.45 |
| 38 | 8.67  | 8.46  | 10.5  | 8.41 | 7.16 | 6.81 | 9.44  | 7.05  | 6.78 |
| 39 | 8.67  | 8.46  | 10.5  | 8.41 | 7.16 | 6.81 | 9.44  | 7.05  | 6.78 |
| 40 | 9.07  | 8.85  | 9.81  | 8.32 | 6.45 | 6.7  | 9.83  | 6.81  | 6.49 |
| 41 | 9.09  | 8.87  | 10.14 | 8.38 | 7.12 | 6.85 | 9.66  | 6.92  | 6.67 |
| 42 | 9.03  | 8.6   | 9.68  | 8.32 | 7.56 | 6.64 | 9.93  | 6.86  | 6.49 |
| 43 | 8.13  | 8.36  | 10.3  | 8.31 | 6.53 | 7.17 | 8.38  | 7.05  | 8.09 |
| 44 | 9.52  | 8.64  | 11.15 | 8.72 | 6.76 | 6.74 | 9.56  | 7.56  | 6.77 |
| 45 | 10.15 | 8.46  | 9.93  | 8.57 | 6.62 | 6.14 | 9.97  | 7.4   | 6.14 |
| 46 | 9.01  | 8.66  | 9.8   | 8.61 | 7.09 | 7.18 | 8.8   | 8.07  | 7.27 |
| 47 | 9.31  | 9.15  | 10.72 | 8.21 | 6.65 | 2.9  | 11.1  | 7.18  | 1.73 |
| 48 | 9.69  | 8.98  | 9.21  | 7.86 | 5.32 | 3.88 | 11.16 | 6.86  | 2.4  |
| 49 | 9.13  | 9.04  | 12.02 | 8.35 | 6.35 | 4.32 | 10.5  | 8.26  | 2.84 |
| 50 | 7.96  | 8.03  | 9.83  | 8.4  | 7.01 | 7.06 | 9.07  | 6.95  | 7.07 |
| 51 | 8.45  | 8.78  | 10.19 | 8.16 | 7.82 | 6.98 | 8.85  | 7.69  | 7.08 |
| 52 | 8.11  | 8.7   | 9.46  | 8.35 | 7.59 | 6.98 | 8.98  | 7.38  | 7.13 |
| 53 | 8.45  | 8.12  | 9.51  | 8.57 | 6.46 | 6.86 | 9.33  | 6.94  | 6.86 |

1  
2  
3  
4  
5  
6  
7  
8  
9  
10  
11  
12  
13  
14  
15  
16  
17  
18  
19  
20  
21  
22  
23  
24  
25  
26  
27  
28  
29  
30  
31  
32  
33  
34  
35  
36  
37  
38  
39  
40  
41  
42  
43  
44  
45  
46  
47  
48  
49  
50  
51  
52  
53  
54  
55  
56  
57  
58  
59  
60

|       |       |       |       |      |      |       |       |      |
|-------|-------|-------|-------|------|------|-------|-------|------|
| 8.99  | 8.42  | 9.82  | 8.53  | 6.89 | 6.33 | 9.89  | 6.55  | 6.31 |
| 7.84  | 8.85  | 9.29  | 8.72  | 6.95 | 7.38 | 8.84  | 6.36  | 7.79 |
| 8.77  | 8.51  | 11.5  | 8.17  | 4.46 | 4.95 | 8.99  | 7.82  | 7.2  |
| 9.72  | 9.06  | 11.25 | 8.42  | 7.35 | 4.47 | 10.69 | 8.49  | 4.78 |
| 9.85  | 8.64  | 11.05 | 8.44  | 7.56 | 4.81 | 10.34 | 9.03  | 3.95 |
| 8.06  | 8.84  | 11.94 | 8.27  | 6.91 | 4.8  | 8.57  | 8.36  | 6.16 |
| 9.56  | 8.53  | 10.34 | 8.18  | 6.12 | 3.64 | 10.51 | 6.48  | 2.13 |
| 9.19  | 8.54  | 10.67 | 8.33  | 6.8  | 3.22 | 10.27 | 7.08  | 2.08 |
| 8.35  | 10.15 | 12.08 | 9.97  | 6.89 | 6.58 | 8.83  | 9.73  | 3.49 |
| 9.68  | 8.64  | 10.71 | 9.2   | 6.38 | 4.79 | 10.19 | 7.51  | 5.49 |
| 10.07 | 8.72  | 9.62  | 8.65  | 5.13 | 4.58 | 11.16 | 6.56  | 2.49 |
| 9.58  | 7.95  | 8.67  | 8.27  | 5.38 | 5.94 | 10.92 | 5.48  | 5.62 |
| 8.85  | 9.02  | 10.82 | 9.78  | 6.65 | 5.43 | 9.85  | 8.82  | 2.26 |
| 8.61  | 8.54  | 9.25  | 9.44  | 6.53 | 8.13 | 8.5   | 3.37  | 8.24 |
| 9.5   | 8.43  | 8.95  | 8.26  | 6.27 | 3.41 | 10.76 | 5.56  | 3.12 |
| 9.67  | 8.42  | 9.08  | 8.29  | 5.56 | 2.42 | 10.87 | 5.86  | 0    |
| 9.49  | 8.52  | 9.13  | 8.16  | 5.54 | 2.98 | 10.8  | 5.89  | 2.52 |
| 9.68  | 8.19  | 11    | 8.01  | 6.83 | 3.83 | 10.67 | 7.11  | 2.43 |
| 8.84  | 7.82  | 9.94  | 7.82  | 6.76 | 5.24 | 9.63  | 6.02  | 6.04 |
| 8.99  | 7.74  | 10.95 | 7.83  | 7.03 | 4.72 | 9.93  | 7.08  | 4.75 |
| 6.75  | 7.49  | 9.75  | 11.97 | 6.75 | 8.86 | 7.75  | 10.66 | 6.16 |
| 9.91  | 8.81  | 10.36 | 10.26 | 4.22 | 3.59 | 10.85 | 5.67  | 1.46 |
| 9.54  | 8.65  | 11.13 | 9.63  | 5.82 | 3.12 | 10.4  | 6.99  | 3.54 |
| 9.03  | 8.7   | 9.39  | 8.67  | 5.5  | 4.35 | 9.39  | 7.99  | 1.18 |
| 8.72  | 8.93  | 10.2  | 9.02  | 6.12 | 5.66 | 9.37  | 8.78  | 2.91 |
| 8.76  | 8.5   | 10.85 | 8.48  | 7.34 | 5.07 | 9.21  | 8.85  | 2.54 |
| 8.09  | 8.72  | 9.08  | 8.28  | 7.15 | 7.61 | 8.05  | 6     | 7.88 |
| 8.21  | 8.72  | 8.67  | 8.54  | 7.47 | 7.7  | 7.99  | 5.9   | 7.8  |
| 7.79  | 8.31  | 8.77  | 8.65  | 7.02 | 7.6  | 7.79  | 6.81  | 7.32 |
| 8.49  | 7.17  | 9.95  | 7.21  | 6.7  | 3.33 | 8.94  | 6.79  | 2.01 |
| 7.97  | 8.33  | 10.26 | 7.5   | 6.89 | 2.4  | 7.13  | 7.37  | 2.18 |
| 8.59  | 8.25  | 9.73  | 7.54  | 6.09 | 3.69 | 8.1   | 7.48  | 0.11 |
| 7.83  | 8.74  | 10.51 | 7.17  | 7.1  | 4.24 | 7.2   | 7.89  | 1.16 |
| 7.54  | 8.23  | 9.11  | 7.95  | 4.97 | 6.83 | 7.51  | 4.97  | 7.27 |
| 7.78  | 7.76  | 8.48  | 7.6   | 5.68 | 6.85 | 7.16  | 4.5   | 6.73 |
| 8.31  | 7.7   | 8.16  | 7.56  | 5.1  | 6.27 | 7.67  | 4.34  | 6.3  |
| 7.48  | 9.32  | 8.52  | 8.34  | 4.94 | 6.58 | 8.32  | 2.32  | 7.77 |
| 7.22  | 7.4   | 8.4   | 7.36  | 5.73 | 6.83 | 6.89  | 4.34  | 7.09 |
| 7.16  | 7.67  | 7.92  | 7.56  | 6.1  | 7.16 | 6.8   | 5     | 6.85 |
| 6.79  | 7.28  | 7.66  | 7.52  | 5.67 | 6.95 | 6.48  | 5.35  | 6.97 |
| 5.87  | 10.13 | 8.34  | 8.71  | 4    | 5    | 9.4   | 6.32  | 8.32 |
| 8.17  | 8.27  | 9.01  | 8.54  | 6.14 | 7.84 | 8.01  | 6.18  | 7.9  |
| 8.56  | 8.65  | 8.96  | 8.8   | 6.68 | 8.16 | 8.35  | 4.18  | 8.05 |
| 9.57  | 7.97  | 9.8   | 8.18  | 5.73 | 7.41 | 8.57  | 6.8   | 7.02 |
| 8.47  | 8.58  | 8.85  | 8.42  | 6    | 7.37 | 8.13  | 5.42  | 7.83 |
| 8.15  | 8.44  | 9.65  | 8.13  | 5.94 | 6.92 | 7.75  | 6.01  | 7.6  |
| 8.1   | 8.83  | 8.8   | 8.31  | 6.18 | 7.64 | 7.77  | 5.75  | 7.78 |
| 7.73  | 8.82  | 8.81  | 8.31  | 7.01 | 8.02 | 7.26  | 5.75  | 8.26 |
| 7.9   | 9.26  | 8.76  | 8.59  | 6.07 | 7.56 | 8.51  | 5.32  | 8.53 |
| 9     | 7.97  | 9.16  | 7.93  | 5.91 | 5.77 | 9.96  | 5.91  | 6.25 |
| 9.03  | 8.06  | 9.62  | 8.08  | 5.95 | 5.85 | 9.95  | 6.65  | 5.97 |
| 8.88  | 8.19  | 9.95  | 8.05  | 6.38 | 5.87 | 10.06 | 6.36  | 5.74 |

<https://mc.manuscriptcentral.com/gut>

1  
2  
3  
4  
5  
6  
7  
8  
9  
10  
11  
12  
13  
14  
15  
16  
17  
18  
19  
20  
21  
22  
23  
24  
25  
26  
27  
28  
29  
30  
31  
32  
33  
34  
35  
36  
37  
38  
39  
40  
41  
42  
43  
44  
45  
46  
47  
48  
49  
50  
51  
52  
53  
54  
55  
56  
57  
58  
59  
60

|       |       |       |      |      |      |       |       |      |
|-------|-------|-------|------|------|------|-------|-------|------|
| 8.8   | 8.02  | 9.62  | 8.27 | 6.38 | 6    | 9.9   | 5.73  | 6.36 |
| 9.72  | 8.99  | 10.78 | 8.94 | 7.05 | 6.27 | 9.89  | 7.86  | 6.47 |
| 9.83  | 9.3   | 10.89 | 8.91 | 6.99 | 6.08 | 10.04 | 7.88  | 5.7  |
| 9.25  | 8.79  | 10.01 | 8.95 | 6.33 | 6.3  | 9.94  | 6.95  | 6.2  |
| 9.27  | 8.86  | 10.23 | 8.8  | 5.93 | 6.46 | 10    | 6.67  | 5.67 |
| 9.46  | 8.36  | 11.01 | 8.56 | 6.95 | 6.53 | 10.68 | 7.3   | 6.8  |
| 9.82  | 8.84  | 11.69 | 9.08 | 6.2  | 4.65 | 11.09 | 9.04  | 4.65 |
| 10.03 | 8.55  | 11.39 | 8.64 | 6.25 | 4.68 | 11.36 | 8.22  | 3.89 |
| 9.27  | 9.86  | 11.99 | 9.42 | 6.5  | 5.33 | 10.19 | 9.55  | 3.91 |
| 11.73 | 10.31 | 11.16 | 9.04 | 7.35 | 5.57 | 11.84 | 7.73  | 4.09 |
| 10.97 | 9.73  | 10.81 | 8.82 | 7.01 | 5.45 | 11.06 | 7.8   | 5.41 |
| 11.03 | 9.68  | 11.54 | 9.02 | 6.98 | 4.97 | 11.11 | 7.98  | 4.84 |
| 11.33 | 9.88  | 10.28 | 8.72 | 6.74 | 4.52 | 11.52 | 7.61  | 4.59 |
| 9.75  | 8.27  | 10.28 | 8.05 | 5.23 | 5.41 | 10.15 | 6.64  | 5.89 |
| 10.39 | 8.56  | 10.79 | 8.26 | 5.44 | 3.42 | 10.43 | 7.77  | 2.51 |
| 8.72  | 9.15  | 10.8  | 8.61 | 6.62 | 6.05 | 8.36  | 8.72  | 5.9  |
| 8.18  | 8.35  | 11.26 | 8.42 | 6.12 | 4.08 | 9.13  | 8.53  | 8.5  |
| 9.49  | 8.82  | 10.95 | 8.21 | 6.99 | 3.25 | 10.61 | 7.37  | 1.67 |
| 8.94  | 9.27  | 11.4  | 8.35 | 7.86 | 2.84 | 10.01 | 8.03  | 2.52 |
| 9.66  | 8.24  | 10.44 | 7.98 | 5.93 | 3.39 | 10.42 | 7.32  | 1.51 |
| 9.41  | 8.59  | 10.33 | 8.18 | 7.56 | 3    | 10.73 | 6.35  | 2.71 |
| 9.82  | 8.28  | 9.06  | 8.42 | 6.41 | 3.18 | 11.3  | 6.12  | 1.48 |
| 9.79  | 9.35  | 10.82 | 8.04 | 6.57 | 6.23 | 9.4   | 7.58  | 5.57 |
| 9.48  | 9.36  | 10.59 | 8.11 | 6.39 | 6.1  | 9.55  | 7.06  | 4.39 |
| 10.48 | 11.14 | 11.55 | 9.24 | 7.32 | 7.79 | 9.1   | 9.42  | 5.74 |
| 8.08  | 7.92  | 10.72 | 7.49 | 5.01 | 3.36 | 8.16  | 6.34  | 4.95 |
| 8.38  | 7.81  | 10.46 | 7.28 | 5.7  | 3.96 | 8.96  | 7.06  | 4.79 |
| 8.68  | 8.3   | 9.75  | 7.33 | 5.05 | 3.46 | 10.28 | 6.01  | 2.93 |
| 8.54  | 9.56  | 10.09 | 7.6  | 6.29 | 4.22 | 9.45  | 7.65  | 1.9  |
| 7.4   | 7.71  | 8.06  | 7.54 | 6.57 | 6.97 | 6.85  | 5.66  | 7.22 |
| 7.26  | 7.5   | 8.36  | 7.23 | 6.3  | 6.74 | 6.24  | 5.76  | 6.76 |
| 7.13  | 7.51  | 7.61  | 6.99 | 6.38 | 6.93 | 6.72  | 5.53  | 7.07 |
| 7.31  | 7.56  | 7.64  | 7.43 | 6.04 | 6.24 | 6.89  | 5.6   | 7.24 |
| 8.24  | 7.38  | 9.67  | 7.22 | 4.85 | 5.55 | 8.97  | 5.27  | 5.47 |
| 8.06  | 7.6   | 9.5   | 7.35 | 5.52 | 6.14 | 8.3   | 5.47  | 6.12 |
| 7.94  | 7.54  | 9.52  | 7.54 | 5.35 | 6.09 | 8.13  | 5.79  | 6.14 |
| 7.76  | 7.75  | 10.13 | 7.33 | 5.94 | 5.75 | 8.08  | 6.44  | 5.67 |
| 7.3   | 8.58  | 11.98 | 8.45 | 4.26 | 4.16 | 7.89  | 7.14  | 5.81 |
| 9.02  | 8.48  | 10.4  | 8.75 | 6.22 | 4.78 | 10.43 | 7.51  | 4.27 |
| 10.05 | 8.22  | 11.24 | 8.47 | 5.51 | 5.17 | 10.18 | 8.34  | 2.42 |
| 8.82  | 8.92  | 12.15 | 9.4  | 5.69 | 7.04 | 8.96  | 9.72  | 2.23 |
| 8.95  | 9.41  | 9.84  | 8.19 | 5.36 | 5.66 | 10.56 | 6.26  | 4.98 |
| 9.03  | 8.83  | 11.64 | 9.68 | 7.51 | 7.97 | 7.68  | 10.44 | 5.51 |
| 9.04  | 8.91  | 10.22 | 8.94 | 6.76 | 2.45 | 10.54 | 7.26  | 2.87 |
| 8.71  | 9.45  | 9.78  | 9.4  | 7.45 | 2.26 | 10.67 | 6.79  | 3.94 |
| 10.44 | 8.43  | 7.22  | 8.55 | 6.07 | 1.68 | 10.94 | 5.85  | 0.68 |
| 9.48  | 8.88  | 10.74 | 8.54 | 6.38 | 5.19 | 10.31 | 6.87  | 4.94 |
| 9.59  | 9.03  | 10.08 | 8.61 | 6.28 | 4.67 | 10.53 | 6.89  | 3.08 |
| 9.52  | 8.78  | 10.4  | 8.46 | 6.06 | 5.43 | 9.93  | 6.94  | 5.26 |
| 8.75  | 8.56  | 10.89 | 8.05 | 5.88 | 2.38 | 9.23  | 6.9   | 4.66 |
| 8.61  | 8     | 9.9   | 7.57 | 6.17 | 4.92 | 8.26  | 6.51  | 4.43 |
| 8.41  | 8.13  | 10.12 | 7.61 | 6    | 4.64 | 8.24  | 6.1   | 4.64 |

<https://mc.manuscriptcentral.com/gut>

1  
2  
3  
4  
5  
6  
7  
8  
9  
10  
11  
12  
13  
14  
15  
16  
17  
18  
19  
20  
21  
22  
23  
24  
25  
26  
27  
28  
29  
30  
31  
32  
33  
34  
35  
36  
37  
38  
39  
40  
41  
42  
43  
44  
45  
46  
47  
48  
49  
50  
51  
52  
53  
54  
55  
56  
57  
58  
59  
60

|      |      |       |       |      |      |       |      |      |
|------|------|-------|-------|------|------|-------|------|------|
| 8.85 | 8.94 | 10.13 | 8.11  | 5.7  | 3.96 | 8.41  | 7.28 | 3.11 |
| 9.03 | 8.42 | 9.06  | 7.89  | 4.91 | 4.42 | 9.71  | 6.39 | 4.8  |
| 8.16 | 8.08 | 9.09  | 7.47  | 5.54 | 3.91 | 10.17 | 5.34 | 4.29 |
| 8.54 | 7.96 | 8.2   | 7.15  | 5.24 | 3.95 | 10.37 | 6.01 | 3.66 |
| 7.34 | 8.47 | 9.08  | 8.08  | 5.95 | 6.76 | 7.88  | 6.72 | 6.14 |
| 8.76 | 8.38 | 11.12 | 7.01  | 5.77 | 2.15 | 9.47  | 6.76 | 2.37 |
| 8.47 | 7.76 | 9.89  | 6.67  | 3.59 | 2.07 | 10.17 | 6.13 | 1.87 |
| 8.44 | 7.74 | 9.73  | 6.99  | 4.16 | 1.35 | 10.07 | 6.09 | 0.94 |
| 7.65 | 7.97 | 8     | 8.05  | 5.4  | 7.08 | 7.63  | 4.97 | 7.24 |
| 8.02 | 8.12 | 9.58  | 7.92  | 5.8  | 6.23 | 8.04  | 6.61 | 6.67 |
| 8.63 | 8.2  | 10.74 | 7.94  | 5.86 | 3.56 | 9.42  | 6.69 | 4.3  |
| 8.46 | 8.47 | 9.76  | 7.67  | 5.98 | 4.59 | 9.37  | 6.47 | 4.59 |
| 8.57 | 8.57 | 10.5  | 8.03  | 5.95 | 4    | 9.25  | 7.19 | 3.89 |
| 7.82 | 8.49 | 10.63 | 8.11  | 6.87 | 4.52 | 8.77  | 7.37 | 4.3  |
| 9.57 | 8.32 | 11.71 | 10.06 | 4.54 | 7.07 | 7.63  | 9.05 | 2.54 |
| 8.59 | 7.9  | 10.57 | 8     | 5.09 | 4.32 | 9.3   | 6.05 | 4.56 |
| 8.68 | 7.92 | 10.15 | 7.96  | 5.5  | 4.88 | 8.69  | 5.88 | 5.42 |
| 8.49 | 8.07 | 10.64 | 8.22  | 4.71 | 4.56 | 9.24  | 6.32 | 3.34 |



1  
2  
3  
4  
5  
6  
7  
8  
9  
10  
11  
12  
13  
14  
15  
16  
17  
18  
19  
20  
21  
22  
23  
24  
25  
26  
27  
28  
29  
30  
31  
32  
33  
34  
35  
36  
37  
38  
39  
40  
41  
42  
43  
44  
45  
46  
47  
48  
49  
50  
51  
52  
53  
54  
55  
56  
57  
58  
59  
60

| STAT1 | STAT3 | SULF1 | SV2B | SYK  | SYNE1 | TACSTD2 | TAL1 | TBX1 |
|-------|-------|-------|------|------|-------|---------|------|------|
| 10.53 | 10.01 | 8.34  | 7.21 | 7.49 | 6.59  | 8.54    | 7.39 | 6.46 |
| 10.13 | 10.37 | 8.01  | 6.21 | 8.05 | 5.86  | 11.13   | 7.1  | 5.81 |
| 10.35 | 10.35 | 7.53  | 6.68 | 7.96 | 5.73  | 12.21   | 7.47 | 6.01 |
| 9.96  | 11.23 | 9.76  | 4.99 | 8.56 | 7.51  | 12.14   | 6.75 | 5.54 |
| 8.45  | 8.94  | 7.26  | 8.2  | 1.01 | 2.01  | 8.62    | 8.68 | 7.03 |
| 11.21 | 10.54 | 10.2  | 6.57 | 7.36 | 6.35  | 8.88    | 6.63 | 5.32 |
| 11.11 | 10.71 | 9.7   | 6.43 | 7.6  | 6.36  | 8.96    | 7    | 5.09 |
| 12.03 | 12    | 10.34 | 4.3  | 8.62 | 7.27  | 10.38   | 4.72 | 3.85 |
| 11.38 | 10.87 | 10.95 | 5.07 | 8.6  | 7.12  | 6.54    | 4.83 | 5.65 |
| 10.17 | 9.96  | 9.9   | 6.25 | 7.84 | 5.37  | 10.89   | 7.01 | 5.86 |
| 10.74 | 10.62 | 10.02 | 3.96 | 8.3  | 6.47  | 10.92   | 4.19 | 3.84 |
| 10.87 | 10.85 | 10.69 | 4.14 | 8.42 | 7.02  | 11.32   | 4.85 | 4.38 |
| 10.68 | 9.66  | 8.55  | 6.41 | 8.78 | 5.39  | 9.53    | 6.89 | 6.23 |
| 10.63 | 10.01 | 9.65  | 6.83 | 8.63 | 6.59  | 9.44    | 7.16 | 6.03 |
| 11.71 | 12    | 8.56  | 5.09 | 9.93 | 7.74  | 11.64   | 6.67 | 4.09 |
| 10.46 | 10.4  | 10.31 | 7.79 | 7.72 | 7.05  | 11.37   | 8.04 | 7.39 |
| 10.79 | 10.63 | 10.17 | 7.72 | 7.15 | 6.93  | 12.16   | 7.8  | 6.75 |
| 10.19 | 10.81 | 10.13 | 6.64 | 6.81 | 6.81  | 10.96   | 7.62 | 6.64 |
| 11.85 | 11.76 | 8.48  | 5.65 | 8.88 | 8.67  | 9.67    | 6.32 | 4.98 |
| 11.96 | 11.2  | 9.9   | 4.4  | 8.41 | 7.73  | 9.2     | 5.4  | 4.12 |
| 12.11 | 11.33 | 9.73  | 5.23 | 8.35 | 8.54  | 7.27    | 6.04 | 4.63 |
| 10.96 | 11.35 | 10.44 | 3.85 | 7.67 | 7.48  | 11.09   | 5.51 | 4.06 |
| 10.71 | 11.24 | 8.31  | 4.37 | 7.93 | 7.78  | 11.49   | 5.41 | 3.52 |
| 10.66 | 11.49 | 10.72 | 4.35 | 7.93 | 8.31  | 11.11   | 5.22 | 4.35 |
| 11.67 | 9.3   | 7.93  | 2.75 | 6.82 | 6.45  | 5.01    | 4.43 | 7.93 |
| 11.06 | 10.52 | 5.65  | 2.71 | 7.98 | 5.62  | 11.47   | 4.45 | 1.71 |
| 10.98 | 10.34 | 6.11  | 3.98 | 8.04 | 5.56  | 11.31   | 4.91 | 2.52 |
| 10.55 | 10.29 | 6.52  | 6.53 | 7.67 | 5.94  | 11.37   | 7.25 | 5.34 |
| 9.91  | 9.65  | 7.85  | 6.62 | 7.94 | 5.7   | 10.65   | 7.28 | 6.16 |
| 10.01 | 10.22 | 8.53  | 6.95 | 8.03 | 6.39  | 10.53   | 7.49 | 6.15 |
| 9.92  | 10.07 | 8.54  | 6.59 | 7.98 | 5.05  | 10.77   | 7    | 6.05 |
| 9.79  | 10.07 | 7.71  | 7.42 | 7.48 | 6.03  | 10.5    | 8.07 | 6.57 |
| 9.82  | 9.99  | 6.42  | 6.56 | 8.81 | 7.79  | 7.65    | 7.82 | 7.11 |
| 10.11 | 11.06 | 12.36 | 5.15 | 7.91 | 7.7   | 8.64    | 4.92 | 3.23 |
| 9.53  | 10.97 | 10.73 | 3.31 | 8.05 | 6.74  | 9.38    | 5.1  | 1.61 |
| 9.87  | 11.18 | 11.31 | 4.86 | 7.8  | 7.68  | 9.01    | 5.23 | 4.28 |
| 11.92 | 11.01 | 8.18  | 4.77 | 8.64 | 7.38  | 8.28    | 5.62 | 5.2  |
| 11.94 | 10.7  | 8.4   | 3.57 | 8.33 | 7.11  | 6.22    | 4.73 | 3.8  |
| 12.15 | 10.6  | 8.37  | 4.07 | 7.99 | 7.49  | 7.35    | 5.01 | 4.07 |
| 12.21 | 10.61 | 8.63  | 3.91 | 8.19 | 7.79  | 8.03    | 4.7  | 3.33 |
| 9.33  | 10.02 | 9.25  | 7.12 | 6.83 | 5.53  | 9.64    | 7.35 | 6.21 |
| 9.02  | 10.13 | 9.52  | 6.87 | 6.27 | 5.78  | 10.41   | 7.12 | 6.01 |
| 9.17  | 9.97  | 8.92  | 6.61 | 6.35 | 5.71  | 9.46    | 7    | 5.5  |
| 9.87  | 10.55 | 9.54  | 5.52 | 6.7  | 5.94  | 10.59   | 6    | 4.46 |
| 10.13 | 12.6  | 6.45  | 4.45 | 7.45 | 5.18  | 9.98    | 7.38 | 6.77 |
| 9.55  | 10.52 | 8.1   | 3.31 | 7.2  | 6.62  | 7.98    | 5.02 | 3.31 |
| 10.11 | 10.66 | 8.83  | 2.81 | 6.77 | 6.46  | 7.74    | 5.28 | 3.32 |
| 10.09 | 10.66 | 9.95  | 3.81 | 6.51 | 7.35  | 7.41    | 5.02 | 2.62 |
| 12    | 11.91 | 10.48 | 4.96 | 8.72 | 7.72  | 10.25   | 5.09 | 3.96 |
| 12    | 11.87 | 11.02 | 3.18 | 7.97 | 6.84  | 10.59   | 5.05 | 3.82 |
| 12.4  | 11.85 | 9.62  | 2.82 | 8.12 | 7.37  | 11.27   | 4.89 | 3.95 |

<https://mc.manuscriptcentral.com/gut>

1  
2  
3  
4  
5  
6  
7  
8  
9  
10  
11  
12  
13  
14  
15  
16  
17  
18  
19  
20  
21  
22  
23  
24  
25  
26  
27  
28  
29  
30  
31  
32  
33  
34  
35  
36  
37  
38  
39  
40  
41  
42  
43  
44  
45  
46  
47  
48  
49  
50  
51  
52  
53  
54  
55  
56  
57  
58  
59  
60

|       |       |       |      |       |      |       |       |      |
|-------|-------|-------|------|-------|------|-------|-------|------|
| 12.23 | 11.82 | 11.41 | 3.89 | 8.27  | 7.8  | 10.95 | 4.47  | 4.25 |
| 11.28 | 9.78  | 8.67  | 7.31 | 8.99  | 5.7  | 11.62 | 7.18  | 5.7  |
| 11.36 | 9.78  | 9     | 7.58 | 10.04 | 5.23 | 11.18 | 7.47  | 6.1  |
| 11.03 | 9.86  | 9.14  | 7.05 | 10.04 | 5.57 | 11.49 | 6.82  | 5.38 |
| 11.5  | 9.87  | 9.36  | 7.39 | 9.93  | 6.18 | 11.2  | 7.22  | 6.1  |
| 10.81 | 11.2  | 8.39  | 6.18 | 9.3   | 7.52 | 11.96 | 6.62  | 6.77 |
| 10.72 | 10.71 | 8.6   | 4.71 | 8.75  | 6.33 | 12.22 | 5.83  | 3.42 |
| 10.43 | 10.2  | 7.74  | 3    | 9.19  | 5.09 | 11.53 | 4.46  | 2.7  |
| 10.47 | 10.77 | 9.28  | 4.76 | 8.59  | 6.96 | 11.86 | 4.61  | 3.02 |
| 11.52 | 10.42 | 8.82  | 3.9  | 7.83  | 6.46 | 3.39  | 3.83  | 2.9  |
| 11.27 | 10.57 | 8.83  | 4.13 | 8.3   | 6.77 | 9.13  | 5.19  | 3.54 |
| 11.07 | 10.41 | 9.08  | 3.72 | 7.74  | 6.01 | 6.67  | 4.82  | 2.99 |
| 11.12 | 10.33 | 9.59  | 3.44 | 7.95  | 6.75 | 6.39  | 3.68  | 3.68 |
| 10.79 | 11.49 | 7.96  | 6.15 | 5.15  | 5.15 | 9.06  | 9.79  | 5.15 |
| 11.77 | 11.24 | 8.96  | 6.07 | 8.23  | 6.34 | 11.39 | 8.3   | 6    |
| 11.74 | 10.3  | 9.44  | 6.72 | 7.54  | 6.02 | 10.46 | 8.21  | 6.24 |
| 8.84  | 9.7   | 8.72  | 7.78 | 0.24  | 1.24 | 9.83  | 10.03 | 7.47 |
| 8.45  | 9.84  | 8.26  | 7.58 | 3.77  | 2.36 | 10.13 | 10.06 | 7.76 |
| 9.49  | 9.93  | 7.68  | 6.58 | 9.11  | 4.23 | 11.85 | 6.87  | 5.6  |
| 9.48  | 9.77  | 6.97  | 6.37 | 8.96  | 3.65 | 12.23 | 7.09  | 5.72 |
| 9.99  | 10    | 8.67  | 6.75 | 8.85  | 5.29 | 11.81 | 7.38  | 6.12 |
| 10.35 | 10.44 | 9.58  | 4.65 | 9.27  | 7.3  | 11.6  | 5.51  | 4.05 |
| 10.14 | 10.2  | 9.26  | 5.67 | 8.98  | 7.17 | 11.29 | 6.3   | 3.98 |
| 9.51  | 9.84  | 8.94  | 7.54 | 8.36  | 6.75 | 10.2  | 7.32  | 6.3  |
| 11.82 | 11.37 | 9.79  | 3.96 | 8.91  | 7.75 | 12    | 5.49  | 4.54 |
| 11.71 | 11.35 | 11.32 | 4.5  | 8.42  | 7.31 | 12.47 | 5.74  | 5.25 |
| 12.02 | 11.39 | 11.45 | 3.5  | 8.62  | 7.63 | 12.3  | 5.28  | 5.86 |
| 11.47 | 10.51 | 10.03 | 6.24 | 7.45  | 5.82 | 9.85  | 7.2   | 5.64 |
| 11.62 | 10.67 | 10.47 | 6.65 | 7.01  | 6.42 | 10.01 | 7.33  | 5.59 |
| 11.44 | 10.45 | 9.82  | 6.71 | 7.3   | 6.4  | 9.7   | 7.16  | 5.55 |
| 10.26 | 10.44 | 8.74  | 7.46 | 9.55  | 6.53 | 9.12  | 7.42  | 6.58 |
| 10.49 | 10.32 | 8.19  | 6.97 | 9.25  | 5.48 | 9.33  | 7.62  | 5.9  |
| 10.01 | 10.37 | 8.03  | 7.42 | 8.98  | 5.69 | 9.07  | 7.5   | 6.45 |
| 10.1  | 10.24 | 10.7  | 7.46 | 6.87  | 6.58 | 11.09 | 7.16  | 6.21 |
| 10.17 | 10.46 | 9.87  | 7.3  | 6.74  | 5.88 | 11.03 | 7.49  | 6.01 |
| 9.93  | 10.62 | 10.6  | 7.04 | 6.64  | 6.85 | 11.25 | 7.54  | 6.09 |
| 9.45  | 10.06 | 9.75  | 7.65 | 7.56  | 6.91 | 10.22 | 7.71  | 6.76 |
| 9.45  | 10.06 | 9.75  | 7.65 | 7.56  | 6.91 | 10.22 | 7.71  | 6.76 |
| 9.74  | 10.63 | 9.63  | 6.76 | 7.43  | 6.58 | 11.2  | 7.49  | 5.79 |
| 9.56  | 10.54 | 9.7   | 7.5  | 6.7   | 6.86 | 10.75 | 7.7   | 6.37 |
| 9.82  | 10.51 | 10.88 | 6.94 | 6.94  | 6.91 | 11.17 | 7.51  | 5.84 |
| 9.85  | 9.61  | 7.39  | 7.88 | 7.18  | 6.62 | 8.61  | 8.05  | 7.05 |
| 11.01 | 10.68 | 9.48  | 7.2  | 7.22  | 6.49 | 9.32  | 7.16  | 6.23 |
| 11.81 | 10.98 | 8.95  | 7.12 | 7.3   | 6.06 | 9.41  | 6.99  | 5.5  |
| 10.83 | 10.46 | 9.12  | 8    | 6.97  | 6.68 | 8.97  | 7.86  | 6.07 |
| 10.38 | 14.2  | 10.61 | 3.73 | 8.63  | 6.63 | 12.07 | 4.48  | 2.73 |
| 9.16  | 13.73 | 8.62  | 3.54 | 8.68  | 4.88 | 12.28 | 4.66  | 2.66 |
| 10.53 | 14.26 | 9.49  | 4.32 | 9.02  | 6.82 | 12.25 | 5.32  | 3.98 |
| 9.46  | 9.45  | 7.62  | 7.71 | 6.94  | 6.56 | 9.32  | 7.8   | 6.88 |
| 9.11  | 10.18 | 10.16 | 7.69 | 6.52  | 6.78 | 9.59  | 7.78  | 6.9  |
| 9.12  | 10.1  | 10.34 | 7.74 | 6.7   | 7.46 | 9.91  | 7.63  | 6.24 |
| 10.25 | 10.27 | 8.93  | 7.28 | 6.44  | 5.72 | 10.19 | 7.22  | 5.53 |

<https://mc.manuscriptcentral.com/gut>

|    |       |       |       |      |      |      |       |      |      |
|----|-------|-------|-------|------|------|------|-------|------|------|
| 1  |       |       |       |      |      |      |       |      |      |
| 2  | 10.34 | 10.59 | 9.48  | 7.12 | 6.19 | 6.06 | 10.63 | 7.01 | 5.14 |
| 3  | 9.06  | 10.64 | 8.92  | 7.39 | 5.45 | 5.36 | 10.43 | 8.1  | 6.42 |
| 4  | 10.19 | 10.81 | 8.13  | 5.62 | 8.73 | 8.31 | 10.29 | 7.15 | 6.34 |
| 5  | 10.07 | 11.06 | 11.01 | 5.57 | 8.4  | 7.63 | 13.2  | 6.55 | 5.36 |
| 6  | 10.23 | 11.18 | 11.96 | 5.35 | 8.18 | 8.24 | 11.01 | 6.22 | 3.3  |
| 7  | 11.78 | 11.2  | 9.61  | 4.58 | 8.8  | 7.68 | 8.56  | 6.13 | 6.11 |
| 8  | 9.95  | 10.23 | 10.5  | 3.01 | 7.95 | 5.99 | 10.28 | 3.8  | 2.55 |
| 9  | 10.45 | 10.28 | 10.85 | 3.84 | 8    | 6.39 | 10.65 | 4.61 | 3.76 |
| 10 | 11    | 12.4  | 9.62  | 6.2  | 8.85 | 7.25 | 11.63 | 7.25 | 5.08 |
| 11 | 10.32 | 11.55 | 9.37  | 4.96 | 8.88 | 7.11 | 8.18  | 5.96 | 5.18 |
| 12 | 11.07 | 11.45 | 9.25  | 3.81 | 8.08 | 6.32 | 8.63  | 3.81 | 2.08 |
| 13 | 10.47 | 10.57 | 8.61  | 6.65 | 7.14 | 5.35 | 8.2   | 6.95 | 6.12 |
| 14 | 10.91 | 12.78 | 9.77  | 5.26 | 8.26 | 6.96 | 10.12 | 6.96 | 4.58 |
| 15 | 9.38  | 8.74  | 8.25  | 8.86 | 0.2  | 1.2  | 9.26  | 9.66 | 8.1  |
| 16 | 9.96  | 10    | 10.63 | 4.19 | 9.36 | 5.3  | 11.6  | 5.47 | 5.23 |
| 17 | 10.08 | 10.09 | 9.6   | 2.83 | 8.6  | 5.36 | 11.53 | 4.29 | 4.88 |
| 18 | 10.11 | 10.03 | 10.08 | 4.56 | 8.97 | 5.91 | 11.55 | 4.88 | 5.1  |
| 19 | 12.63 | 10.78 | 10.45 | 3.14 | 7.67 | 7.53 | 11.97 | 3.34 | 3.52 |
| 20 | 11.81 | 10.2  | 10.5  | 5.69 | 6.31 | 6.88 | 11.54 | 7.08 | 5.29 |
| 21 | 12.28 | 10.6  | 10.83 | 4.15 | 7.32 | 7.18 | 11.97 | 6.76 | 4.57 |
| 22 | 7.49  | 13.86 | 7.16  | 5.16 | 6.16 | 5.16 | 9.07  | 8.97 | 6.16 |
| 23 | 10.04 | 10.54 | 7.46  | 1.94 | 7.54 | 5.54 | 7.59  | 4.42 | 3.13 |
| 24 | 11.17 | 10.69 | 9.13  | 3.99 | 8.24 | 7.04 | 9.02  | 5.06 | 4.62 |
| 25 | 10.68 | 11.59 | 8.6   | 4.18 | 6.96 | 6.77 | 11.39 | 4.5  | 4.64 |
| 26 | 10.4  | 11.8  | 8.48  | 4.91 | 7.66 | 7.45 | 11.69 | 6.49 | 4.71 |
| 27 | 10.98 | 11.3  | 10.14 | 4.35 | 7.68 | 7.75 | 10.72 | 5.54 | 5.45 |
| 28 | 8.37  | 9.17  | 7.04  | 8.14 | 5.17 | 4.46 | 8.85  | 8.53 | 7.55 |
| 29 | 8.37  | 8.08  | 7.46  | 8.26 | 0.86 | 0.86 | 8.59  | 8.95 | 7.5  |
| 30 | 8.24  | 8.19  | 7.19  | 8.51 | 1.77 | 2.77 | 8.52  | 8.78 | 7.05 |
| 31 | 9.47  | 9.96  | 10.08 | 4.87 | 7.13 | 6.93 | 10.26 | 4.01 | 4.71 |
| 32 | 8.79  | 10.37 | 10.48 | 4.55 | 6.07 | 7.32 | 8.89  | 4.45 | 1.18 |
| 33 | 8.94  | 10.67 | 9     | 4.69 | 7.04 | 6.34 | 9.74  | 4.69 | 1.11 |
| 34 | 8.86  | 10.68 | 9.85  | 4.96 | 6.61 | 7.22 | 8.8   | 4.55 | 2.74 |
| 35 | 7.87  | 8.71  | 6.33  | 7.33 | 4.91 | 2.04 | 8.31  | 7.69 | 6.36 |
| 36 | 7.99  | 8.16  | 6.87  | 7.59 | 4.84 | 2.84 | 8.74  | 7.4  | 6.25 |
| 37 | 9.06  | 8.55  | 6.43  | 7.11 | 5.04 | 3.15 | 9     | 7.2  | 5.91 |
| 38 | 7.17  | 8.17  | 7.38  | 6.92 | 0    | 0.32 | 8.39  | 8.18 | 6.23 |
| 39 | 7.68  | 7.73  | 6.58  | 7.66 | 4.51 | 3.34 | 7.79  | 8.02 | 6.69 |
| 40 | 7.4   | 7.98  | 6.14  | 7.77 | 3.1  | 1.1  | 7.52  | 7.7  | 6.52 |
| 41 | 7.28  | 8.22  | 6.86  | 7.49 | 3.63 | 1.31 | 7.75  | 7.52 | 6.58 |
| 42 | 6.11  | 9.13  | 7.62  | 4.73 | 3.41 | 3.41 | 7.17  | 8.54 | 2.41 |
| 43 | 8.86  | 8.78  | 7.16  | 8.38 | 4.76 | 4.64 | 9.13  | 8.94 | 7.38 |
| 44 | 8.76  | 8.35  | 7.48  | 8.84 | 0.33 | 0    | 8.88  | 9.16 | 7.68 |
| 45 | 10.48 | 9.99  | 6.29  | 7.73 | 6.67 | 4.04 | 10.12 | 8.29 | 6.51 |
| 46 | 8.72  | 9.2   | 7.03  | 8.2  | 3.56 | 2.33 | 9.19  | 8.74 | 7.18 |
| 47 | 8.93  | 10.87 | 7.89  | 7.57 | 7.22 | 5.71 | 8.06  | 7.96 | 6.86 |
| 48 | 8.94  | 10.97 | 7.42  | 8.36 | 5.25 | 3.88 | 8.52  | 8.73 | 7.63 |
| 49 | 8.65  | 9.43  | 7.49  | 8.7  | 0.71 | 0.71 | 8.55  | 8.68 | 7.25 |
| 50 | 7.99  | 10.15 | 7.77  | 7.88 | 4.07 | 2.48 | 8.78  | 8.83 | 7.02 |
| 51 | 11.14 | 9.14  | 9.22  | 7.32 | 7.28 | 5.16 | 9.07  | 6.58 | 5.12 |
| 52 | 10.65 | 9.49  | 9.71  | 6.89 | 8.39 | 5.3  | 9.76  | 6.34 | 4.5  |
| 53 | 10.84 | 9.33  | 9.4   | 7.33 | 8.04 | 5.59 | 9.65  | 6.38 | 5.32 |

<https://mc.manuscriptcentral.com/gut>

1  
2  
3  
4  
5  
6  
7  
8  
9  
10  
11  
12  
13  
14  
15  
16  
17  
18  
19  
20  
21  
22  
23  
24  
25  
26  
27  
28  
29  
30  
31  
32  
33  
34  
35  
36  
37  
38  
39  
40  
41  
42  
43  
44  
45  
46  
47  
48  
49  
50  
51  
52  
53  
54  
55  
56  
57  
58  
59  
60

|       |       |       |      |      |      |       |      |      |
|-------|-------|-------|------|------|------|-------|------|------|
| 10.9  | 9.18  | 9.49  | 7.34 | 7.95 | 5.63 | 9.43  | 6.87 | 5.4  |
| 12.11 | 11.78 | 9.34  | 6.49 | 8.01 | 6.91 | 11.4  | 7.49 | 6.07 |
| 11.14 | 11.37 | 9.21  | 6.67 | 7.77 | 6.64 | 11.13 | 7.71 | 5.99 |
| 12.17 | 11.69 | 7.98  | 7.15 | 7.39 | 6.06 | 11.42 | 7.65 | 5.95 |
| 12.03 | 11.77 | 8.44  | 6.82 | 7.48 | 5.57 | 11.47 | 7.41 | 5.86 |
| 11.45 | 11.1  | 9.92  | 7.01 | 7.9  | 7.36 | 9.85  | 8    | 6.36 |
| 11.86 | 12.36 | 8.93  | 5.37 | 8.56 | 7.56 | 11.91 | 6.23 | 4.75 |
| 11.76 | 11.97 | 8.82  | 4.68 | 7.93 | 7.32 | 10.4  | 6.3  | 3.79 |
| 11.91 | 12.49 | 8.22  | 6.2  | 8.51 | 8.57 | 10.62 | 6.87 | 4.99 |
| 10.69 | 11.63 | 10.69 | 5.22 | 8.82 | 6.35 | 8.19  | 6.85 | 4.85 |
| 10.75 | 11.08 | 10.5  | 5.38 | 8.88 | 7.25 | 7.95  | 7.49 | 5.17 |
| 10.83 | 11.17 | 11.15 | 5.67 | 8.9  | 7.11 | 7.54  | 6.88 | 4.63 |
| 10.28 | 11.26 | 10.22 | 4.87 | 8.93 | 7.03 | 7.7   | 6.66 | 3.87 |
| 9.68  | 10.26 | 9.08  | 6.21 | 7.86 | 6.44 | 9.91  | 6.77 | 5.76 |
| 10.23 | 10.89 | 8.56  | 2.83 | 7.98 | 6.71 | 10.77 | 5.12 | 3.09 |
| 9.63  | 11.14 | 9.21  | 6.73 | 7.74 | 7.58 | 10.3  | 7.09 | 5.87 |
| 10.73 | 10.64 | 8.86  | 5.28 | 8.67 | 8.21 | 9.97  | 6.19 | 7.17 |
| 10.09 | 10.65 | 10.48 | 3.84 | 8.33 | 7.27 | 10.22 | 5.06 | 4.37 |
| 10.8  | 10.92 | 11.31 | 5.1  | 8.13 | 8.26 | 10.36 | 5.33 | 3.33 |
| 11.26 | 10.22 | 9.73  | 4.25 | 8.63 | 7.14 | 10.63 | 4.25 | 3.25 |
| 10.09 | 10.42 | 11.05 | 3.45 | 8.08 | 5.88 | 7.2   | 4.3  | 4.07 |
| 9.95  | 10.49 | 8.84  | 1.48 | 9.36 | 4.94 | 6.78  | 3.48 | 1.06 |
| 9.55  | 10.25 | 8.98  | 6.91 | 7.79 | 6.46 | 9.91  | 7.46 | 5.69 |
| 9.66  | 10.44 | 9.59  | 6.79 | 8.05 | 6.29 | 10.37 | 7.66 | 5.39 |
| 9.1   | 12.52 | 8.32  | 6.47 | 8.54 | 8.1  | 12.16 | 7.54 | 5.74 |
| 10.68 | 9.63  | 7.64  | 3.36 | 7.98 | 7.21 | 5.53  | 2.68 | 4.61 |
| 10.39 | 9.52  | 8.22  | 3.96 | 7.04 | 6.6  | 7.43  | 5.92 | 3.11 |
| 10.95 | 9.2   | 9.26  | 2.09 | 7.11 | 5.49 | 6.12  | 4.16 | 2.76 |
| 10.42 | 9.59  | 9.65  | 3.9  | 7.15 | 7.57 | 5.71  | 5.07 | 4.22 |
| 7.04  | 7.62  | 6.28  | 7.69 | 1.76 | 1.76 | 7.4   | 7.8  | 6.22 |
| 7.18  | 8.79  | 6.55  | 7.76 | 4.63 | 3.3  | 7.83  | 7.58 | 6.65 |
| 7.33  | 7.44  | 6.5   | 7.95 | 0.88 | 1.88 | 7.64  | 7.9  | 6.5  |
| 7.35  | 7.72  | 6.42  | 7.96 | 2.96 | 2.96 | 7.46  | 7.85 | 6.63 |
| 8.96  | 9.74  | 7.15  | 6.09 | 6.25 | 4.53 | 8.12  | 6.62 | 5.06 |
| 9.12  | 9.17  | 6.95  | 6.67 | 5.18 | 4.57 | 7.97  | 7.07 | 5.57 |
| 8.47  | 9.32  | 8.12  | 6.74 | 5.16 | 5.01 | 8.47  | 6.97 | 5.32 |
| 8.89  | 9.59  | 8.24  | 6.38 | 5.88 | 5.88 | 8.99  | 6.78 | 5.07 |
| 10.49 | 10.62 | 6.44  | 5.4  | 9.78 | 8.51 | 5.21  | 4.81 | 5.48 |
| 9.82  | 10.52 | 10.18 | 6.11 | 8.12 | 7.11 | 8.71  | 6.67 | 4.63 |
| 12.17 | 10.91 | 7.84  | 4.33 | 8.21 | 7.09 | 11.13 | 5.17 | 3.88 |
| 11.6  | 12.28 | 7.32  | 5.23 | 9.52 | 7.55 | 10.23 | 7.91 | 7.04 |
| 10.38 | 9.69  | 9.53  | 5.98 | 7.38 | 6.24 | 11.02 | 6.97 | 5.47 |
| 11.24 | 12.29 | 7.1   | 6.1  | 9.21 | 8.51 | 10.34 | 8.42 | 6.51 |
| 10.51 | 10.59 | 10.1  | 4.39 | 8.39 | 7.12 | 11.35 | 4.96 | 5.39 |
| 10.46 | 10.64 | 11.43 | 3.94 | 8.61 | 7.27 | 11.95 | 4.64 | 5.1  |
| 9.67  | 10.34 | 4.49  | 2.27 | 7.04 | 5    | 9.29  | 6.73 | 0.68 |
| 10.76 | 10.66 | 9.46  | 5.38 | 7.8  | 6.79 | 9.47  | 7.16 | 4.63 |
| 10.71 | 10.58 | 9     | 4.52 | 7.7  | 6.63 | 9.8   | 6.45 | 2.28 |
| 10.76 | 10.24 | 8.85  | 6.68 | 7.5  | 6.68 | 9.47  | 7.32 | 5.3  |
| 9.68  | 10.58 | 9.83  | 4.66 | 7.67 | 6.37 | 10.67 | 5.27 | 5.68 |
| 9.29  | 10.12 | 9.23  | 5.7  | 6.66 | 6.02 | 9.2   | 6.11 | 5.05 |
| 8.97  | 10.24 | 8.71  | 5.94 | 6.4  | 6.23 | 9.11  | 6.65 | 5.29 |

<https://mc.manuscriptcentral.com/gut>

1  
2  
3  
4  
5  
6  
7  
8  
9  
10  
11  
12  
13  
14  
15  
16  
17  
18  
19  
20  
21  
22  
23  
24  
25  
26  
27  
28  
29  
30  
31  
32  
33  
34  
35  
36  
37  
38  
39  
40  
41  
42  
43  
44  
45  
46  
47  
48  
49  
50  
51  
52  
53  
54  
55  
56  
57  
58  
59  
60

|       |       |       |      |      |      |       |      |      |
|-------|-------|-------|------|------|------|-------|------|------|
| 9.62  | 11.03 | 7.97  | 4.49 | 7.2  | 6.81 | 9.53  | 4.6  | 3.37 |
| 8.66  | 10.02 | 10.18 | 5.27 | 7.29 | 6.01 | 8.03  | 6.56 | 4.68 |
| 9.25  | 9.26  | 8.6   | 5.72 | 7.03 | 4.76 | 6.65  | 6.39 | 4.91 |
| 9.48  | 9.22  | 8.36  | 3.81 | 6.91 | 4.39 | 6.16  | 6.1  | 4.29 |
| 7.95  | 9.51  | 6.36  | 7.58 | 5.72 | 3.14 | 8.3   | 8.59 | 6.95 |
| 11.26 | 10.13 | 9.5   | 2.73 | 7.88 | 6.06 | 4.73  | 3.73 | 2.57 |
| 11.6  | 9.95  | 7.97  | 2.53 | 7.53 | 4.97 | 5.26  | 2.53 | 1.39 |
| 11.56 | 9.98  | 7.55  | 2.16 | 7.43 | 4.74 | 5.69  | 3.35 | 0.94 |
| 8.09  | 7.59  | 6.27  | 7.82 | 0.27 | 1.27 | 8.12  | 8.36 | 6.92 |
| 8.69  | 9.28  | 8.05  | 7.3  | 6.78 | 5.83 | 8.41  | 7.44 | 6.41 |
| 9.73  | 11.03 | 9.28  | 5.65 | 8.3  | 6.97 | 9.96  | 5.11 | 5.11 |
| 9.48  | 10.39 | 9.58  | 6.32 | 7.5  | 6.44 | 9.13  | 7    | 5.28 |
| 9.77  | 10.93 | 8.74  | 4.89 | 8.2  | 7.34 | 8.48  | 6.35 | 5.21 |
| 9.77  | 10.58 | 9.63  | 5.77 | 7.47 | 6.96 | 8.61  | 6.48 | 5.13 |
| 8.24  | 12.94 | 6.63  | 5.87 | 7.13 | 5.87 | 8.9   | 6.54 | 4.87 |
| 11.01 | 10.3  | 8.54  | 3.5  | 7.69 | 6.28 | 10.83 | 5.61 | 6.44 |
| 10.58 | 9.44  | 7.81  | 5.52 | 7.22 | 6.09 | 10.19 | 6.6  | 5.09 |
| 10.96 | 10.6  | 8.51  | 4.15 | 7.69 | 6.49 | 11.14 | 5.18 | 6.64 |

1  
2  
3  
4  
5  
6  
7  
8  
9  
10  
11  
12  
13  
14  
15  
16  
17  
18  
19  
20  
21  
22  
23  
24  
25  
26  
27  
28  
29  
30  
31  
32  
33  
34  
35  
36  
37  
38  
39  
40  
41  
42  
43  
44  
45  
46  
47  
48  
49  
50  
51  
52  
53  
54  
55  
56  
57  
58  
59  
60

| TBX4 | TBXA2R | TCEB1 | TCEB2 | TCF20 | TCF3  | TCF4  | TDGF1 | TEK  |
|------|--------|-------|-------|-------|-------|-------|-------|------|
| 6.75 | 6.92   | 9.63  | 6.62  | 8.03  | 6.56  | 8.86  | 7.09  | 4.15 |
| 6.23 | 6.67   | 10.13 | 6.82  | 8.27  | 6.59  | 9.01  | 6.16  | 5.48 |
| 6.25 | 6.23   | 10.09 | 6.42  | 8.14  | 6.46  | 8.98  | 6.33  | 4.99 |
| 1.76 | 6.16   | 10.08 | 6.7   | 8.5   | 7.32  | 10.09 | 4.09  | 6.04 |
| 8.51 | 8.51   | 10.49 | 7.47  | 7.59  | 5.82  | 8.43  | 8.74  | 1.01 |
| 6.73 | 6.23   | 9.96  | 6.75  | 7.9   | 6.31  | 8.54  | 7.3   | 4.3  |
| 6.55 | 6.13   | 9.96  | 6.76  | 7.87  | 6.2   | 8.67  | 7.06  | 4.44 |
| 0.39 | 5.52   | 10.54 | 7.08  | 7.54  | 8.44  | 9.85  | 7.73  | 4.39 |
| 3.69 | 5.12   | 10.02 | 6.27  | 8.07  | 7.34  | 9.42  | 5.69  | 4.17 |
| 5.74 | 6.02   | 9.78  | 6.77  | 8.15  | 6.83  | 8.02  | 6.37  | 4    |
| 0.38 | 3.84   | 10.03 | 6.84  | 8.55  | 6.79  | 8.6   | 4.77  | 5.02 |
| 2.27 | 4.77   | 10.16 | 6.3   | 8.53  | 7.41  | 9.17  | 4.68  | 5.33 |
| 5.87 | 6.63   | 10.44 | 6.23  | 9.1   | 7.43  | 8.11  | 8     | 4.8  |
| 6.26 | 6.73   | 10.59 | 6.36  | 9.29  | 7.2   | 8.94  | 7.07  | 5.76 |
| 1.77 | 6.9    | 10.77 | 5.67  | 8.99  | 10.02 | 10.89 | 6.58  | 5.09 |
| 6.75 | 6.85   | 10.02 | 6.34  | 8.11  | 6.92  | 9.49  | 7.63  | 4.4  |
| 6.54 | 6.9    | 10.16 | 6.61  | 8.28  | 6.84  | 9.21  | 6.99  | 4.75 |
| 7.19 | 7.69   | 10.21 | 6.54  | 7.69  | 7.15  | 9.45  | 7.21  | 4.08 |
| 0    | 5.85   | 10.02 | 6.48  | 9.1   | 9.26  | 10.72 | 2.9   | 4.6  |
| 1.89 | 3.89   | 10.14 | 6.37  | 9.59  | 7.8   | 9.51  | 4.73  | 5.86 |
| 3.31 | 5.23   | 9.98  | 6.28  | 9.38  | 7.96  | 9.93  | 4.14  | 6.17 |
| 4.15 | 5.36   | 10.21 | 6.28  | 9.05  | 8.17  | 9.79  | 2.96  | 5.85 |
| 3.01 | 5.06   | 10.38 | 5.72  | 9.18  | 8.19  | 9.46  | 4.59  | 5.56 |
| 2.22 | 3.8    | 10.16 | 6.18  | 9.1   | 7.69  | 9.49  | 4.75  | 5.57 |
| 0.43 | 3.89   | 10.36 | 5.78  | 9.08  | 7.63  | 8.17  | 3.43  | 3.43 |
| 1.71 | 3.94   | 10.66 | 6.13  | 9.22  | 7.88  | 8.37  | 2.94  | 4.65 |
| 3.52 | 5.11   | 10.48 | 6.01  | 9.14  | 7.87  | 8.2   | 3.11  | 4.91 |
| 6.32 | 6.62   | 10.24 | 6.02  | 8.81  | 7.32  | 8.58  | 6.53  | 5.09 |
| 6.05 | 6.75   | 9.62  | 7.24  | 8.82  | 7.27  | 8.16  | 6.86  | 3.7  |
| 6.53 | 6.94   | 9.79  | 6.91  | 8.54  | 7.26  | 8.71  | 6.86  | 5.09 |
| 6.37 | 7.1    | 9.56  | 7.37  | 9.14  | 7.89  | 8.25  | 6.55  | 4.59 |
| 7.08 | 7.12   | 9.9   | 7.17  | 8.36  | 7.54  | 8.7   | 7.39  | 4.03 |
| 6.57 | 7.52   | 9.66  | 6.11  | 8.42  | 7.07  | 9.32  | 6.24  | 4.96 |
| 2.38 | 5.06   | 10.15 | 6.49  | 8.76  | 7.25  | 9.58  | 2.64  | 6.06 |
| 2.61 | 5.17   | 10.24 | 6.7   | 8.65  | 7.23  | 9.09  | 2.61  | 4.9  |
| 2.47 | 4.79   | 10.04 | 6.6   | 8.41  | 7.42  | 9.69  | 2.47  | 4.79 |
| 0.45 | 4.03   | 10.23 | 5.65  | 7.82  | 7.65  | 9.15  | 2.45  | 3.45 |
| 2.73 | 4.26   | 10.01 | 5.1   | 8.19  | 7.24  | 8.25  | 2.99  | 4.57 |
| 1.37 | 5.61   | 9.71  | 5.01  | 7.73  | 7.02  | 9.05  | 3.69  | 4.95 |
| 3.44 | 3.91   | 9.64  | 5.42  | 8.03  | 6.93  | 8.69  | 3.44  | 3.44 |
| 6.5  | 6.27   | 9.29  | 6.29  | 7.68  | 6.1   | 8.43  | 6.63  | 3.6  |
| 6.64 | 5.87   | 9.48  | 6.42  | 7.65  | 6.34  | 8.26  | 6.97  | 2.7  |
| 6.26 | 5.64   | 9.39  | 6.31  | 7.85  | 5.97  | 7.93  | 6.96  | 3.39 |
| 5.49 | 5.1    | 9.2   | 6.31  | 8.38  | 6.76  | 8.14  | 6.14  | 3.14 |
| 4.86 | 7.03   | 11.26 | 6.45  | 7.61  | 10.18 | 9.34  | 3.86  | 2.86 |
| 2.31 | 5.36   | 9.66  | 6.15  | 8.68  | 6.72  | 8.77  | 4.4   | 4.96 |
| 0    | 3.7    | 9.74  | 6.36  | 8.85  | 6.74  | 9.27  | 2.81  | 5.83 |
| 0.81 | 4.33   | 9.48  | 5.56  | 8.46  | 6.65  | 9.65  | 3.13  | 6.04 |
| 3.22 | 4.88   | 11.23 | 5.92  | 8.92  | 7.96  | 9.61  | 4.09  | 4.8  |
| 2.01 | 4.82   | 11.53 | 6.31  | 9.23  | 7.41  | 9.15  | 3.71  | 4.87 |
| 0.5  | 3.67   | 11.59 | 7.06  | 9.08  | 7.56  | 8.76  | 3.82  | 4.74 |

<https://mc.manuscriptcentral.com/gut>

|    |      |       |       |      |      |      |      |      |      |
|----|------|-------|-------|------|------|------|------|------|------|
| 1  |      |       |       |      |      |      |      |      |      |
| 2  | 2.66 | 4.08  | 11.41 | 6.36 | 9.04 | 7.26 | 9.3  | 3.66 | 5.36 |
| 3  | 6.66 | 7.09  | 10.77 | 6.1  | 8.92 | 7.23 | 8.14 | 9.01 | 3.84 |
| 4  | 6.94 | 6.65  | 10.86 | 5.65 | 9.03 | 7.07 | 8.65 | 8.76 | 5.28 |
| 5  | 6.52 | 6.33  | 10.87 | 6.29 | 9.25 | 7.52 | 8.6  | 8.8  | 4.35 |
| 6  | 7.01 | 6.54  | 10.79 | 5.61 | 8.99 | 7.25 | 8.39 | 8.61 | 4.92 |
| 7  | 4.62 | 6.01  | 10.03 | 6.6  | 8.59 | 8.22 | 9.31 | 4.48 | 5.14 |
| 8  | 2.83 | 5.42  | 10.17 | 7.39 | 8.96 | 8.6  | 9.02 | 3.05 | 5.57 |
| 9  | 2.59 | 4.65  | 10.06 | 7.94 | 8.97 | 8.7  | 8.02 | 2.46 | 4.76 |
| 10 | 2.76 | 4.53  | 9.86  | 7.78 | 9.05 | 8.72 | 8.99 | 2.44 | 4.96 |
| 11 | 1.17 | 4.44  | 11.18 | 7.63 | 8.67 | 6.84 | 8.21 | 7.03 | 4.28 |
| 12 | 0.54 | 4.54  | 10.98 | 8.55 | 8.85 | 6.97 | 8.77 | 5.9  | 5.45 |
| 13 | 2.62 | 4.9   | 11.38 | 8.8  | 8.87 | 6.61 | 8.29 | 6.17 | 5.21 |
| 14 | 2.56 | 3.44  | 10.91 | 8.24 | 8.52 | 6.71 | 8.64 | 5.47 | 4.93 |
| 15 | 9.06 | 11.13 | 8.96  | 5.15 | 7.15 | 8.61 | 9.15 | 5.15 | 5.15 |
| 16 | 8.51 | 9     | 11.11 | 6.65 | 7.25 | 9.96 | 9.75 | 6.96 | 2.37 |
| 17 | 7.76 | 7.71  | 10.77 | 6.9  | 7.71 | 8.73 | 9.01 | 7.37 | 3.36 |
| 18 | 9.68 | 10.26 | 11.03 | 7.41 | 7.78 | 5.92 | 9.53 | 9.11 | 0.24 |
| 19 | 9.49 | 10.51 | 10.53 | 7.77 | 7.3  | 6.66 | 9.07 | 8.89 | 1.77 |
| 20 | 5.87 | 6.39  | 10.61 | 7.69 | 9.32 | 7.57 | 7.9  | 6.65 | 3.6  |
| 21 | 6    | 6.23  | 10.67 | 7.71 | 9.45 | 7.44 | 7.29 | 6.61 | 3.43 |
| 22 | 6.57 | 6.83  | 10.42 | 7.64 | 9.25 | 7.56 | 8.2  | 6.65 | 3.92 |
| 23 | 2.8  | 4.18  | 10.57 | 7.65 | 8.65 | 6.94 | 9.41 | 3.62 | 6.12 |
| 24 | 4.74 | 5.49  | 10.61 | 7.86 | 8.69 | 7.1  | 8.99 | 5.23 | 5.83 |
| 25 | 7.44 | 6.22  | 10.64 | 7.35 | 8.66 | 5.91 | 9    | 7.3  | 5.44 |
| 26 | 2.64 | 6.44  | 10.6  | 6.44 | 9.52 | 7.82 | 9.14 | 4.72 | 5.96 |
| 27 | 3.74 | 6.15  | 10.74 | 6.75 | 9.71 | 7.68 | 9.47 | 3.95 | 5.77 |
| 28 | 3.28 | 5.45  | 10.83 | 6.69 | 9.87 | 7.57 | 9.56 | 4.01 | 5.08 |
| 29 | 6.4  | 5.72  | 11.08 | 5.64 | 8.64 | 7.22 | 8.39 | 7    | 5.06 |
| 30 | 6.42 | 5.86  | 11.05 | 5.76 | 8.67 | 7.17 | 8.72 | 6.59 | 4.37 |
| 31 | 6.83 | 6.11  | 10.94 | 5.85 | 8.47 | 7.18 | 8.68 | 7.13 | 4.68 |
| 32 | 6.94 | 6.87  | 10.5  | 6.46 | 9.44 | 7.03 | 8.76 | 9.31 | 5.07 |
| 33 | 6.9  | 6.8   | 10.43 | 6.93 | 9.28 | 7.55 | 8.37 | 8.45 | 4.29 |
| 34 | 7.47 | 6.98  | 10.32 | 6.75 | 9.21 | 7.47 | 8.36 | 8.8  | 4.08 |
| 35 | 6.95 | 6.58  | 10.36 | 6.93 | 8.5  | 6.98 | 8.63 | 7.09 | 4.19 |
| 36 | 7.09 | 6.42  | 10.49 | 7.01 | 8.4  | 7.27 | 8.51 | 7.35 | 4.27 |
| 37 | 7.13 | 6.62  | 10.38 | 6.79 | 8.43 | 7.05 | 8.82 | 6.94 | 4.73 |
| 38 | 7.21 | 7.04  | 9.97  | 6.72 | 8.35 | 6.83 | 9.31 | 7.14 | 4.76 |
| 39 | 7.21 | 7.04  | 9.97  | 6.72 | 8.35 | 6.83 | 9.31 | 7.14 | 4.76 |
| 40 | 7.33 | 7.04  | 9.92  | 7.01 | 8.12 | 7.35 | 8.94 | 6.73 | 4.54 |
| 41 | 7.45 | 6.53  | 10.07 | 6.82 | 8.26 | 7    | 8.94 | 7.39 | 4.18 |
| 42 | 7.44 | 6.87  | 9.8   | 6.74 | 8.28 | 6.93 | 9.28 | 7.1  | 3.59 |
| 43 | 7.64 | 5.84  | 10.32 | 6.91 | 7.94 | 6.73 | 8.95 | 7.93 | 4.14 |
| 44 | 6.71 | 5.85  | 10.38 | 6.84 | 8.28 | 7.01 | 8.89 | 7.01 | 5.05 |
| 45 | 6.66 | 5.76  | 10.57 | 6.78 | 8.24 | 6.74 | 8.55 | 6.46 | 5.41 |
| 46 | 7.44 | 6.59  | 10.36 | 6.52 | 8.06 | 6.72 | 8.83 | 7.55 | 5.13 |
| 47 | 1.31 | 4.73  | 10.69 | 7.08 | 8.74 | 7.72 | 9.32 | 7.5  | 4.31 |
| 48 | 2.4  | 4.72  | 10.77 | 7.5  | 8.6  | 7.74 | 8.46 | 6.4  | 4.4  |
| 49 | 3.1  | 5.22  | 10.9  | 6.91 | 8.34 | 8.38 | 9.81 | 6.89 | 4.22 |
| 50 | 7.18 | 6.56  | 10.01 | 6.42 | 8.06 | 6.84 | 8.81 | 7.9  | 4.96 |
| 51 | 7.11 | 7.11  | 10.06 | 6.77 | 8.1  | 6.81 | 9.42 | 7.61 | 4.72 |
| 52 | 7.01 | 6.41  | 10.07 | 6.8  | 8.24 | 6.76 | 9.48 | 7.49 | 4.92 |
| 53 | 6.82 | 4.72  | 10.3  | 6.01 | 8.08 | 6.64 | 8.15 | 7.63 | 3.86 |

1  
2  
3  
4  
5  
6  
7  
8  
9  
10  
11  
12  
13  
14  
15  
16  
17  
18  
19  
20  
21  
22  
23  
24  
25  
26  
27  
28  
29  
30  
31  
32  
33  
34  
35  
36  
37  
38  
39  
40  
41  
42  
43  
44  
45  
46  
47  
48  
49  
50  
51  
52  
53  
54  
55  
56  
57  
58  
59  
60

|      |       |       |      |       |       |       |      |      |
|------|-------|-------|------|-------|-------|-------|------|------|
| 6.25 | 4.59  | 10.43 | 6.14 | 8.29  | 6.28  | 8.29  | 7.31 | 4.47 |
| 7.75 | 7.05  | 10.64 | 6.49 | 7.56  | 7.3   | 8.96  | 8.39 | 2.36 |
| 5.27 | 6.78  | 9.72  | 5.97 | 8.81  | 7.98  | 9.54  | 4.49 | 4.92 |
| 4.08 | 5.93  | 10.18 | 6.32 | 9.31  | 7.35  | 9.81  | 3.25 | 5.47 |
| 3.95 | 6.01  | 9.85  | 6.47 | 9.18  | 7.58  | 10.12 | 3.95 | 5.88 |
| 2.41 | 5.76  | 10.84 | 5.87 | 8.38  | 8.35  | 10.26 | 3.21 | 5.16 |
| 2.55 | 4.5   | 10.07 | 5.78 | 8.31  | 7.16  | 8.56  | 2.55 | 5.01 |
| 2.34 | 5.25  | 10.42 | 5.97 | 8.2   | 7.12  | 8.71  | 3.66 | 5.64 |
| 4.82 | 8.35  | 11.42 | 6.66 | 7.02  | 9.84  | 11.04 | 5.49 | 5.66 |
| 1.79 | 5.25  | 10.18 | 6.15 | 8.08  | 7.87  | 9.79  | 2.38 | 4.7  |
| 2.08 | 3.81  | 10.55 | 6.32 | 7.98  | 6.7   | 8.39  | 4.4  | 4.3  |
| 6.43 | 5.18  | 10.09 | 6.37 | 7.8   | 6.08  | 7.59  | 6.76 | 4.14 |
| 2.26 | 7.51  | 11.1  | 6.96 | 6.72  | 10.12 | 11.07 | 4.58 | 2.26 |
| 8.63 | 8.38  | 11.26 | 7.8  | 9.2   | 4.37  | 8.02  | 8.8  | 0.2  |
| 3.75 | 5.12  | 10.81 | 6.49 | 10.36 | 7.07  | 8.1   | 7.82 | 3.27 |
| 1.42 | 3.83  | 10.89 | 6.8  | 10.53 | 6.94  | 7.88  | 8    | 4.79 |
| 3.22 | 4.73  | 10.69 | 6.3  | 10.32 | 6.94  | 8.04  | 8.13 | 5.13 |
| 2.24 | 3.76  | 10.02 | 5.74 | 8.99  | 6.64  | 8.58  | 3.52 | 4.02 |
| 6.24 | 6.25  | 9.57  | 6.16 | 8.48  | 6.44  | 8.71  | 5.83 | 2.47 |
| 5.46 | 6.19  | 9.78  | 5.57 | 8.76  | 6.6   | 8.72  | 4.79 | 4.1  |
| 6.16 | 11.12 | 10.21 | 6.75 | 6.16  | 10.86 | 11.37 | 5.16 | 5.16 |
| 2.3  | 4.34  | 10.43 | 7.28 | 8.32  | 5.67  | 8.11  | 2.46 | 4.3  |
| 3.86 | 5.06  | 10.28 | 6.76 | 8.3   | 6.42  | 8.88  | 2.12 | 5.44 |
| 2.18 | 5.09  | 10.09 | 5.5  | 8.51  | 7.81  | 9.99  | 4.5  | 3.99 |
| 2.49 | 6.71  | 10.18 | 5.81 | 8.29  | 8.97  | 10.67 | 6.04 | 5.43 |
| 2.54 | 4.71  | 9.82  | 5.59 | 8.89  | 7.77  | 10.17 | 2.54 | 5.4  |
| 8.28 | 8.24  | 10.29 | 7.21 | 7.35  | 5.75  | 8.36  | 8.6  | 1    |
| 8.14 | 8.54  | 10.32 | 7.2  | 7.53  | 5.32  | 8.08  | 8.71 | 0.86 |
| 7.96 | 7.65  | 10.22 | 6.63 | 7.41  | 4.09  | 7.92  | 8.31 | 1.77 |
| 0.01 | 2.82  | 8.46  | 4.18 | 8.03  | 6.52  | 8.78  | 2.01 | 4.92 |
| 0    | 3.4   | 8.66  | 5.29 | 7.54  | 6.29  | 9.32  | 1.91 | 5.05 |
| 0.11 | 4.11  | 8.9   | 4.63 | 7.87  | 7.36  | 9.11  | 1.11 | 4.36 |
| 0.16 | 4.68  | 8.67  | 5.01 | 7.76  | 6.44  | 9.29  | 2.96 | 5.2  |
| 7.58 | 7.64  | 9.43  | 6.31 | 6.56  | 5.26  | 7.84  | 7.44 | 0.45 |
| 7.15 | 6.27  | 9.44  | 5.84 | 6.66  | 5.46  | 7.38  | 7.36 | 0.25 |
| 6.96 | 6.64  | 9.27  | 5.84 | 6.56  | 5.96  | 7.12  | 6.7  | 0    |
| 8.52 | 8.2   | 9.73  | 5.41 | 6.75  | 3.57  | 7.63  | 7.52 | 0    |
| 7.19 | 6.76  | 9.56  | 6.14 | 7.14  | 5.51  | 7.78  | 7.46 | 1.34 |
| 7.45 | 6.83  | 9.6   | 6.27 | 6.93  | 5     | 7.56  | 7.33 | 2.1  |
| 7.31 | 6.5   | 9.56  | 6.31 | 6.89  | 5.12  | 7.61  | 7.48 | 0.31 |
| 9.58 | 9.35  | 9.29  | 3.41 | 5.41  | 5     | 8.05  | 6.73 | 2.41 |
| 8.72 | 8.19  | 10.35 | 7.66 | 7.56  | 6.7   | 8.29  | 8.49 | 2.06 |
| 8.59 | 8.3   | 10.63 | 7.75 | 8.06  | 4.65  | 8.59  | 8.8  | 0.91 |
| 7.33 | 7.54  | 10.18 | 6.93 | 7.51  | 6.51  | 8.38  | 7.53 | 1.87 |
| 8.09 | 7.92  | 10.23 | 7.36 | 7.7   | 6.05  | 8.3   | 8.29 | 2.07 |
| 7.48 | 7.73  | 9.96  | 7.01 | 7.4   | 6.64  | 8.83  | 7.69 | 2.76 |
| 8.34 | 8.11  | 10.44 | 7.52 | 7.94  | 6.4   | 8.64  | 8.22 | 0.3  |
| 8.38 | 7.38  | 10.59 | 7.56 | 8.01  | 4.29  | 8.31  | 8.45 | 2.71 |
| 8.89 | 8.82  | 10.54 | 7.2  | 7.86  | 6.16  | 8.47  | 8.38 | 0    |
| 6.35 | 5.2   | 11.1  | 6.45 | 8.45  | 6.39  | 7.07  | 7.18 | 3.08 |
| 6.3  | 4.7   | 11.03 | 6.08 | 8.84  | 6.88  | 7.4   | 7.22 | 3.65 |
| 6.43 | 6.12  | 10.9  | 6.17 | 8.58  | 7     | 7.39  | 7.06 | 3.84 |

<https://mc.manuscriptcentral.com/gut>



|    |      |      |       |      |      |       |       |      |      |
|----|------|------|-------|------|------|-------|-------|------|------|
| 1  |      |      |       |      |      |       |       |      |      |
| 2  | 6.5  | 6.98 | 10.89 | 6.27 | 8.61 | 6.94  | 7.24  | 7.42 | 4.27 |
| 3  | 6.1  | 6.96 | 10.41 | 7.93 | 8.62 | 7.64  | 9.33  | 6.49 | 5.04 |
| 4  | 6.5  | 7    | 10.51 | 7.9  | 8.26 | 7.77  | 9.13  | 6.76 | 5.27 |
| 5  | 6.74 | 6.83 | 10.48 | 8.89 | 8.5  | 8.03  | 8.18  | 6.95 | 3.55 |
| 6  | 6.54 | 6.82 | 10.41 | 8.57 | 8.37 | 8.2   | 8.23  | 6.61 | 4.51 |
| 7  | 6.95 | 7.04 | 10.51 | 6.47 | 8.87 | 7.35  | 9.66  | 7.17 | 4.57 |
| 8  | 3.65 | 6.27 | 10.87 | 6.54 | 8.48 | 8.58  | 10.01 | 4.01 | 5.37 |
| 9  | 3.68 | 5.79 | 10.48 | 6.42 | 8.67 | 8.1   | 9.21  | 3.89 | 5.3  |
| 10 | 3.74 | 6.91 | 10.4  | 6.6  | 8.13 | 9.13  | 10.64 | 3.74 | 4.99 |
| 11 | 4.85 | 6.49 | 10.87 | 6.26 | 9.24 | 7.75  | 9.56  | 4.46 | 5.35 |
| 12 | 5.07 | 7.18 | 10.12 | 6.41 | 8.96 | 8.09  | 9.52  | 6.14 | 5.21 |
| 13 | 5.14 | 6.74 | 10.25 | 6.11 | 9.03 | 7.89  | 9.73  | 5.63 | 5.59 |
| 14 | 4.52 | 6.75 | 10.27 | 6.65 | 8.94 | 8.11  | 9.26  | 5.35 | 5.23 |
| 15 | 5.61 | 5.43 | 10.14 | 6.42 | 8.37 | 6.87  | 8.53  | 6.69 | 3.06 |
| 16 | 1.51 | 3.9  | 10.41 | 6.99 | 8.82 | 7.58  | 8.64  | 7.77 | 5    |
| 17 | 6.15 | 6.35 | 10.3  | 6.85 | 7.72 | 7.82  | 10    | 7.77 | 4.67 |
| 18 | 1.58 | 3.9  | 9.33  | 6.08 | 8.73 | 7.72  | 9.9   | 3.58 | 5.72 |
| 19 | 0.67 | 4.37 | 9.87  | 6.52 | 8.56 | 8.24  | 9.32  | 2.67 | 5.19 |
| 20 | 0.52 | 4.69 | 9.77  | 6.54 | 8.67 | 7.9   | 9.9   | 4.33 | 5.52 |
| 21 | 1.51 | 3.39 | 10.38 | 5.57 | 8.46 | 7.85  | 8.85  | 4.18 | 4.93 |
| 22 | 3    | 5    | 10.76 | 6.04 | 9.56 | 7.96  | 8.8   | 8.33 | 4.3  |
| 23 | 1.48 | 3.87 | 10.23 | 5.78 | 9.53 | 7.85  | 7.83  | 8.9  | 4.65 |
| 24 | 6.11 | 6.78 | 9.57  | 7.17 | 8.28 | 6.69  | 9.54  | 6.28 | 4.57 |
| 25 | 5.88 | 7.04 | 9.68  | 7.25 | 8.51 | 7.14  | 9.36  | 5.88 | 4.1  |
| 26 | 5.15 | 8.28 | 10.68 | 6.85 | 6.74 | 8.79  | 11.39 | 6.15 | 3.15 |
| 27 | 0.36 | 3.17 | 8.81  | 4.68 | 7.59 | 6.9   | 8.39  | 4.68 | 4.27 |
| 28 | 4.25 | 5.92 | 8.97  | 4.88 | 7.87 | 5.31  | 8.62  | 4.88 | 5.11 |
| 29 | 3.22 | 5.09 | 8.9   | 5.16 | 8.05 | 5.93  | 7.94  | 6.62 | 4.01 |
| 30 | 1.9  | 3.48 | 8.84  | 4.22 | 7.11 | 2.9   | 9     | 5.99 | 4.22 |
| 31 | 7.4  | 7.31 | 9.66  | 6.51 | 7.04 | 4.57  | 7.01  | 7.8  | 1.76 |
| 32 | 7.2  | 6.74 | 9.72  | 6.27 | 6.93 | 6.04  | 7.73  | 7.32 | 0.72 |
| 33 | 7.69 | 6.93 | 9.75  | 6.05 | 6.72 | 4.05  | 6.88  | 7.84 | 0.88 |
| 34 | 7.33 | 7.31 | 9.54  | 6.57 | 6.91 | 4.86  | 7.35  | 8    | 2.96 |
| 35 | 5.84 | 5.31 | 9.06  | 5.45 | 6.78 | 5.22  | 7.29  | 6.05 | 3.17 |
| 36 | 6.64 | 6.37 | 8.84  | 5.68 | 6.64 | 4.42  | 7.48  | 6.64 | 2.83 |
| 37 | 6.18 | 5.65 | 8.81  | 5.7  | 6.84 | 4.94  | 7.83  | 6.61 | 3.77 |
| 38 | 6.18 | 5.91 | 8.94  | 5.56 | 6.74 | 4.95  | 7.96  | 6.34 | 3.56 |
| 39 | 1.35 | 4.26 | 9.39  | 5.16 | 8.79 | 8.12  | 10.31 | 2.94 | 4.35 |
| 40 | 5.92 | 7.13 | 9.88  | 5.71 | 9.17 | 7.16  | 9.29  | 5.71 | 4.78 |
| 41 | 0.42 | 4.74 | 10.61 | 6    | 8.78 | 8.07  | 9.15  | 3.88 | 5.06 |
| 42 | 3.23 | 7.55 | 11.64 | 7.36 | 7.66 | 10.55 | 11.08 | 2.23 | 2.23 |
| 43 | 5.65 | 6.76 | 10.15 | 4.93 | 8.22 | 7.14  | 8.44  | 5.91 | 3.84 |
| 44 | 4.51 | 7.68 | 11.03 | 7.1  | 7.97 | 9.8   | 11.38 | 6.51 | 5.51 |
| 45 | 2.19 | 4.19 | 10.34 | 5.19 | 8.62 | 7.9   | 9.21  | 3.04 | 5    |
| 46 | 0.94 | 3.52 | 10.25 | 4.89 | 8.8  | 7.54  | 9.23  | 1.52 | 4.69 |
| 47 | 4.85 | 3.49 | 10.16 | 6.41 | 8.91 | 7.12  | 6.68  | 2.27 | 3.27 |
| 48 | 5.31 | 6.29 | 10.3  | 6.68 | 8.41 | 7.11  | 8.92  | 5.19 | 2.98 |
| 49 | 5.08 | 4.36 | 10.15 | 7.18 | 8.49 | 7.25  | 8.63  | 3.08 | 3.6  |
| 50 | 5.75 | 6.6  | 10.09 | 6.73 | 8.37 | 6.68  | 8.58  | 5.93 | 4.26 |
| 51 | 0.57 | 3.48 | 10.09 | 4.66 | 7.82 | 6.22  | 8.68  | 1.57 | 3.82 |
| 52 | 5.28 | 6.34 | 9.35  | 5.11 | 7.73 | 5.11  | 8.28  | 5.39 | 4.34 |
| 53 | 5.59 | 6.02 | 9.04  | 4.69 | 7.37 | 5     | 8.4   | 5.39 | 4.16 |

|      |      |       |      |      |      |       |      |      |
|------|------|-------|------|------|------|-------|------|------|
| 0.79 | 4.49 | 9.58  | 5.25 | 7.42 | 6.28 | 9.14  | 3.6  | 3.96 |
| 5.27 | 7.1  | 8.86  | 5.8  | 6.98 | 7.27 | 8.83  | 5.49 | 2.68 |
| 4.17 | 5.59 | 9.16  | 6.17 | 7.69 | 7.12 | 8.06  | 5.11 | 2.59 |
| 4.29 | 5.53 | 9.35  | 5.49 | 7.8  | 7.13 | 8.04  | 4.88 | 2.49 |
| 6.88 | 7.68 | 9.35  | 6.6  | 6.08 | 7.74 | 8.84  | 8.08 | 2.55 |
| 1.89 | 4.02 | 9.76  | 5.4  | 8.6  | 7.36 | 8.05  | 1.15 | 4.21 |
| 3.39 | 4.07 | 9.26  | 4.24 | 8.39 | 7.28 | 6.82  | 3.59 | 2.39 |
| 2.16 | 4.26 | 9.4   | 4.67 | 8.4  | 7.62 | 6.83  | 3.26 | 2.94 |
| 7.65 | 7.44 | 9.62  | 6.25 | 7.15 | 5.27 | 7.93  | 7.75 | 1.27 |
| 6.82 | 6.73 | 9.6   | 6.3  | 7.46 | 5.8  | 8.45  | 7.16 | 3.77 |
| 2.82 | 4.97 | 9.48  | 6.05 | 8.08 | 7.01 | 9.5   | 3.11 | 4.56 |
| 5.64 | 6.1  | 9.39  | 6.21 | 7.99 | 6.38 | 8.97  | 5.64 | 4.21 |
| 4    | 6    | 9.38  | 6.3  | 7.73 | 7.14 | 9.5   | 5.39 | 4.47 |
| 5.55 | 6.68 | 9.21  | 5.85 | 7.64 | 6.1  | 9.4   | 5.3  | 5.03 |
| 2.54 | 8.32 | 11.35 | 4.13 | 4.87 | 9.93 | 10.13 | 6.13 | 4.13 |
| 5.23 | 5.73 | 11.11 | 4.5  | 7.45 | 6.87 | 8.37  | 4.75 | 3.12 |
| 6.19 | 5.93 | 10.09 | 4.96 | 7.71 | 6.03 | 7.98  | 6.09 | 4.04 |
| 4.07 | 5.61 | 11.21 | 4.28 | 7.45 | 7.46 | 8.49  | 3.75 | 3.45 |

1  
2  
3  
4  
5  
6  
7  
8  
9  
10  
11  
12  
13  
14  
15  
16  
17  
18  
19  
20  
21  
22  
23  
24  
25  
26  
27  
28  
29  
30  
31  
32  
33  
34  
35  
36  
37  
38  
39  
40  
41  
42  
43  
44  
45  
46  
47  
48  
49  
50  
51  
52  
53  
54  
55  
56  
57  
58  
59  
60

| TF   | TFDP1 | TFPI2 | TGFB1 | TGFB2 | TGFBI | TGFBR2 | THBS1 | THBS2 |
|------|-------|-------|-------|-------|-------|--------|-------|-------|
| 2.88 | 8.62  | 2.88  | 9.01  | 3.81  | 8.87  | 8.68   | 9.55  | 9.27  |
| 3.54 | 8.84  | 4.96  | 9.07  | 4.59  | 10.08 | 9.23   | 10.18 | 8.32  |
| 4.67 | 8.8   | 4.33  | 9.18  | 4.84  | 10.08 | 9.07   | 9.81  | 8.07  |
| 5.64 | 8.74  | 8.21  | 10.11 | 5.7   | 11.25 | 10.38  | 12.23 | 9.92  |
| 4.01 | 9.42  | 3.33  | 9.87  | 3.82  | 3.82  | 8.04   | 7.84  | 7.87  |
| 2.49 | 9.01  | 6.51  | 8.79  | 6.15  | 9.86  | 8.39   | 10.6  | 10.21 |
| 2.24 | 8.83  | 6.46  | 8.82  | 6.29  | 10.19 | 8.57   | 10.26 | 9.83  |
| 4.2  | 9.47  | 8.63  | 10.87 | 6.52  | 11.4  | 10.03  | 11.98 | 10.47 |
| 3.54 | 8.49  | 4.07  | 10.28 | 4.27  | 10.77 | 9.8    | 11.99 | 11.12 |
| 2.72 | 8.56  | 1.49  | 8.85  | 5.19  | 9.32  | 8.4    | 10.37 | 9.98  |
| 3.38 | 8.7   | 3.84  | 8.76  | 5.08  | 10.21 | 9.32   | 11.18 | 9.8   |
| 3.49 | 8.73  | 4     | 9.41  | 5.73  | 10.68 | 9.28   | 12.07 | 10.53 |
| 2.35 | 9.89  | 3.71  | 8.26  | 3.64  | 9.08  | 9.72   | 9.39  | 9.09  |
| 2    | 10.05 | 4     | 8.82  | 3.67  | 10.03 | 9.5    | 10.81 | 10.71 |
| 5.47 | 10.3  | 6.67  | 12.1  | 4.35  | 11.15 | 10.87  | 11.45 | 9.72  |
| 2.94 | 9.33  | 4.11  | 9.62  | 4.53  | 10.32 | 9.3    | 11.36 | 10.45 |
| 4.1  | 9.59  | 3.87  | 9.47  | 5.54  | 9.76  | 9.12   | 10.06 | 10.29 |
| 3.76 | 9.25  | 3.35  | 9.88  | 4.93  | 11.52 | 9.18   | 10.93 | 10.93 |
| 4.48 | 9.36  | 5.29  | 11.49 | 3.36  | 10.5  | 11.1   | 11.61 | 9.48  |
| 3.12 | 9.88  | 5.44  | 9.58  | 5.01  | 10.5  | 10.11  | 11.17 | 9.33  |
| 2.82 | 9.69  | 5.33  | 10.25 | 4.41  | 10.46 | 10.47  | 12.06 | 9.34  |
| 4.67 | 9.03  | 7.94  | 9.72  | 6.78  | 11.63 | 9.79   | 10.88 | 9.83  |
| 3.9  | 8.96  | 8.06  | 9.61  | 7.12  | 11.35 | 9.76   | 10.98 | 9.22  |
| 3.59 | 8.75  | 6.65  | 9.42  | 7.22  | 11.25 | 10.02  | 12.36 | 10.08 |
| 11.6 | 9.08  | 3.75  | 8.98  | 5.47  | 9.27  | 8.03   | 9.7   | 7.33  |
| 4.94 | 9.65  | 1.13  | 8.11  | 5.34  | 9.2   | 9.73   | 9.54  | 3.94  |
| 4.11 | 9.61  | 2.52  | 7.9   | 5.22  | 9.15  | 9.83   | 9.36  | 5.16  |
| 3.62 | 9.21  | 2.72  | 8.47  | 5     | 8.97  | 9.42   | 9.65  | 6.02  |
| 1.28 | 8.85  | 2.87  | 8.71  | 3.6   | 8.62  | 8.68   | 9.09  | 8.95  |
| 2.58 | 8.73  | 5.06  | 9.11  | 3.94  | 9.45  | 8.97   | 10.08 | 8.35  |
| 1.2  | 8.66  | 5.15  | 8.59  | 4.78  | 9.42  | 8.69   | 9.53  | 8.33  |
| 2.71 | 8.99  | 0.71  | 9.28  | 3.03  | 9.46  | 8.81   | 9.87  | 9     |
| 4.74 | 8.54  | 5.3   | 9.68  | 3.99  | 8.94  | 9.5    | 10.65 | 6.88  |
| 5.49 | 9.47  | 6.64  | 9.72  | 7.51  | 11.26 | 9.29   | 11.82 | 10.9  |
| 5.44 | 9.94  | 7     | 9.43  | 7.13  | 11.23 | 9.13   | 11.38 | 9.62  |
| 5.64 | 9.68  | 5.72  | 9.91  | 6.74  | 11.05 | 9.73   | 11.83 | 10.37 |
| 2.77 | 9.03  | 3.62  | 10.35 | 3.03  | 9.97  | 9.49   | 10.97 | 8.25  |
| 2.21 | 8.74  | 5.4   | 9.25  | 4.45  | 10.31 | 8.94   | 10.58 | 8.52  |
| 3.17 | 8.54  | 5.61  | 9.77  | 4.37  | 10.25 | 9.4    | 10.91 | 9.18  |
| 3.07 | 8.51  | 4.2   | 9.69  | 3.91  | 10    | 9.36   | 10.44 | 8.67  |
| 2.68 | 8.26  | 2.83  | 8.69  | 4.47  | 9.53  | 7.98   | 10.2  | 9.63  |
| 2.9  | 8.34  | 2.7   | 8.32  | 4.94  | 10.07 | 7.71   | 10.19 | 9.76  |
| 2.22 | 8.32  | 1.22  | 8.22  | 5.03  | 9.06  | 7.6    | 9.46  | 9.29  |
| 1.82 | 8.16  | 0.82  | 8.13  | 5.72  | 9.52  | 7.64   | 10.12 | 10.08 |
| 13.1 | 10.19 | 7.03  | 12.6  | 5.67  | 10.63 | 9.5    | 9.78  | 8.07  |
| 4.31 | 8.74  | 4.84  | 8.31  | 5.12  | 9.66  | 9.14   | 9.53  | 7.65  |
| 4.58 | 8.92  | 4.91  | 8.68  | 5.28  | 9.82  | 9.13   | 10.57 | 9.51  |
| 4.51 | 8.67  | 3.9   | 8.8   | 6.28  | 10.27 | 9.23   | 11.29 | 10.93 |
| 4.22 | 10.05 | 3.63  | 10.31 | 5.59  | 11.28 | 10.45  | 11.93 | 11.19 |
| 3.33 | 10.17 | 3.59  | 9.95  | 5.92  | 11.49 | 9.77   | 11.47 | 11.24 |
| 3.3  | 10.11 | 5.2   | 9.87  | 6.33  | 10.86 | 9.67   | 10.46 | 9.73  |

<https://mc.manuscriptcentral.com/gut>

1  
2  
3  
4  
5  
6  
7  
8  
9  
10  
11  
12  
13  
14  
15  
16  
17  
18  
19  
20  
21  
22  
23  
24  
25  
26  
27  
28  
29  
30  
31  
32  
33  
34  
35  
36  
37  
38  
39  
40  
41  
42  
43  
44  
45  
46  
47  
48  
49  
50  
51  
52  
53  
54  
55  
56  
57  
58  
59  
60

|      |       |      |       |      |       |       |       |       |
|------|-------|------|-------|------|-------|-------|-------|-------|
| 4.47 | 9.96  | 4.94 | 10.1  | 6.69 | 11.59 | 9.79  | 12.06 | 11.48 |
| 2.35 | 10.83 | 3.35 | 8.71  | 4.49 | 10.31 | 9.79  | 9.36  | 10.05 |
| 1.19 | 10.72 | 6.97 | 8.96  | 5.44 | 11.41 | 9.38  | 9.99  | 9.18  |
| 2.76 | 10.6  | 6.49 | 8.91  | 5.24 | 11.54 | 9.38  | 10.11 | 8.72  |
| 3.29 | 10.58 | 3.67 | 8.89  | 5.14 | 11.26 | 9.6   | 9.98  | 9.28  |
| 3.4  | 9.59  | 4.69 | 9.66  | 4.75 | 9.62  | 10.08 | 10.44 | 9.2   |
| 4.25 | 10.49 | 1.83 | 9.13  | 5.64 | 10.05 | 9.23  | 10.32 | 8.54  |
| 2.7  | 10.78 | 1.32 | 8.68  | 4.53 | 9.07  | 9.06  | 9.12  | 7.69  |
| 4.35 | 10.51 | 3.61 | 9.56  | 5.65 | 9.95  | 9.07  | 10.85 | 9.2   |
| 2.9  | 9.02  | 2.39 | 8.37  | 4.44 | 9.36  | 8.19  | 9.33  | 8.85  |
| 2.54 | 9.81  | 3.86 | 8.78  | 5.67 | 10.25 | 8.74  | 10.16 | 8.21  |
| 2.4  | 9.83  | 3.14 | 8.25  | 4.99 | 9.97  | 8.41  | 9.48  | 8.27  |
| 2.79 | 9.7   | 2.98 | 8.49  | 5.81 | 10.07 | 8.6   | 10.53 | 8.7   |
| 7.47 | 8.61  | 5.15 | 13.6  | 6.74 | 8.15  | 10.51 | 8.47  | 6.74  |
| 3.6  | 10.07 | 4.11 | 11.98 | 3.11 | 10.67 | 9.96  | 11.81 | 8.73  |
| 2.28 | 9.58  | 3.6  | 10.48 | 3.6  | 9.98  | 9.39  | 11.26 | 9.11  |
| 0.24 | 10.01 | 0.24 | 9.86  | 1.24 | 1.83  | 7.65  | 8.58  | 8.48  |
| 3.1  | 9.9   | 2.77 | 10.16 | 2.36 | 5.17  | 7.84  | 8.33  | 8.21  |
| 2.95 | 10.71 | 2.46 | 7.61  | 4.6  | 9.05  | 9.38  | 9.06  | 6.99  |
| 2.58 | 10.65 | 1.26 | 7.28  | 4.88 | 8.55  | 9.53  | 8.52  | 6.34  |
| 1.67 | 10.53 | 2.26 | 8.45  | 4.2  | 9.06  | 9.56  | 9.72  | 8.3   |
| 2.9  | 9.82  | 4.85 | 9.28  | 6.14 | 10.14 | 9.9   | 11.63 | 9.97  |
| 2.6  | 9.71  | 3.45 | 8.9   | 5.74 | 9.66  | 9.63  | 10.96 | 9.42  |
| 3.63 | 9.27  | 3.37 | 8.81  | 5.63 | 9.35  | 9.38  | 10.85 | 9.59  |
| 3.64 | 9.85  | 5.88 | 9.45  | 6.92 | 10.9  | 9.96  | 11.43 | 8.72  |
| 3.63 | 9.88  | 5.43 | 9.47  | 7.11 | 11.51 | 9.83  | 12.23 | 10.65 |
| 3.01 | 9.95  | 4.28 | 9.88  | 6.9  | 12.2  | 9.68  | 12.05 | 10.52 |
| 4.75 | 9.72  | 5.31 | 9.1   | 4.53 | 10.64 | 8.14  | 10.82 | 9.28  |
| 4.98 | 9.72  | 6.3  | 9.08  | 4.62 | 11.02 | 8.07  | 11.18 | 9.58  |
| 4.85 | 9.63  | 4.96 | 9.18  | 4.47 | 10.44 | 8.12  | 11.28 | 9.3   |
| 4.29 | 9.39  | 4.44 | 9.34  | 4.7  | 11.68 | 9.51  | 10.71 | 10.51 |
| 2.52 | 9.77  | 3.2  | 9.56  | 5.11 | 11.88 | 8.9   | 9.11  | 8.03  |
| 1.99 | 9.69  | 0.99 | 9.46  | 4.9  | 11.91 | 8.93  | 9.65  | 8.42  |
| 3.54 | 8.77  | 3.73 | 9.72  | 5.02 | 10.64 | 9.8   | 11.55 | 10.33 |
| 2.88 | 9.1   | 3.58 | 9.6   | 4.63 | 10.43 | 9.38  | 10.9  | 10.06 |
| 4.73 | 8.78  | 5.68 | 9.89  | 4.24 | 11.2  | 9.71  | 12.34 | 11.12 |
| 4.34 | 9.02  | 4.34 | 9.35  | 5.14 | 9.48  | 8.89  | 11.76 | 10.21 |
| 4.34 | 9.02  | 4.34 | 9.35  | 5.14 | 9.48  | 8.89  | 11.76 | 10.21 |
| 3.61 | 9.69  | 3.47 | 8.97  | 5.19 | 9.56  | 8.85  | 10.84 | 9.27  |
| 4.18 | 9.27  | 3.76 | 9.09  | 5.91 | 10.56 | 9.08  | 11.61 | 9.75  |
| 2.69 | 9.34  | 4.15 | 9.09  | 6.29 | 10.17 | 8.98  | 12.37 | 11.4  |
| 4.64 | 9.01  | 4.56 | 9.29  | 4.56 | 8.49  | 8.89  | 9.95  | 8.19  |
| 6.82 | 9.09  | 7.12 | 9.29  | 5.72 | 10.28 | 8.83  | 11.03 | 9.3   |
| 6.08 | 8.94  | 8.81 | 8.91  | 6.14 | 10.18 | 9.09  | 10.68 | 8.85  |
| 5.86 | 8.95  | 6.93 | 9.46  | 5.13 | 10.05 | 9.03  | 10.27 | 8.83  |
| 3.81 | 9.93  | 6.6  | 9.69  | 5.12 | 10.75 | 9.1   | 11.38 | 10    |
| 3.08 | 10.15 | 6.8  | 8.79  | 4.93 | 10.16 | 9.24  | 10.37 | 8.45  |
| 3.52 | 9.92  | 4.98 | 11.09 | 4.69 | 11.38 | 9.62  | 10.97 | 9.96  |
| 2.74 | 8.8   | 3.32 | 9.11  | 4.06 | 8.37  | 8.87  | 10.43 | 8.88  |
| 2.82 | 8.86  | 5.8  | 9.48  | 5.87 | 10.27 | 9.14  | 11.65 | 10.12 |
| 2.04 | 8.72  | 4.04 | 9.07  | 5.59 | 10.09 | 8.94  | 11.13 | 9.64  |
| 1.4  | 8.88  | 3.98 | 8.82  | 5.15 | 9.51  | 8.29  | 9.81  | 8.86  |

<https://mc.manuscriptcentral.com/gut>

1  
2  
3  
4  
5  
6  
7  
8  
9  
10  
11  
12  
13  
14  
15  
16  
17  
18  
19  
20  
21  
22  
23  
24  
25  
26  
27  
28  
29  
30  
31  
32  
33  
34  
35  
36  
37  
38  
39  
40  
41  
42  
43  
44  
45  
46  
47  
48  
49  
50  
51  
52  
53  
54  
55  
56  
57  
58  
59  
60

|      |       |      |       |      |       |       |       |       |
|------|-------|------|-------|------|-------|-------|-------|-------|
| 3.47 | 8.96  | 4.53 | 8.71  | 5.75 | 10.35 | 8.07  | 10.48 | 9.42  |
| 2.36 | 9.1   | 4.78 | 10.3  | 4.48 | 10.39 | 8.36  | 11.08 | 8.99  |
| 4.67 | 8.96  | 3.77 | 9.8   | 5.1  | 9.62  | 9.85  | 11.5  | 9.39  |
| 5.43 | 9.21  | 5.86 | 9.78  | 6.65 | 11.71 | 9.95  | 11.92 | 10.69 |
| 3.08 | 9.01  | 3.66 | 9.91  | 7.1  | 11.49 | 10.27 | 12.36 | 11.63 |
| 4.31 | 8.6   | 5.93 | 10.99 | 4.65 | 10.4  | 9.68  | 11.43 | 10.36 |
| 2.55 | 9.26  | 4.41 | 8.83  | 5.76 | 10.44 | 9.66  | 10.53 | 10.24 |
| 2.76 | 9.29  | 4.51 | 9.2   | 5.61 | 10.62 | 9.91  | 11.01 | 10.31 |
| 5.3  | 9.8   | 6.08 | 13.04 | 5.66 | 12.14 | 11.51 | 12.45 | 9.39  |
| 4.49 | 9.39  | 4.6  | 10.5  | 5.04 | 10.44 | 9.79  | 11.29 | 9.95  |
| 3.49 | 9.64  | 5.62 | 8.95  | 5.53 | 9.64  | 8.37  | 9.84  | 9.02  |
| 1.48 | 9.13  | 2.21 | 8.28  | 4.7  | 8.62  | 7.76  | 9.2   | 8.23  |
| 5.26 | 10.16 | 5.96 | 12.87 | 5.26 | 11.89 | 10.58 | 12.37 | 10.33 |
| 1.79 | 10.38 | 0    | 9.75  | 0.79 | 1.2   | 7.63  | 8.43  | 8.04  |
| 1.53 | 10.3  | 4.85 | 9.42  | 5.7  | 10.1  | 8.29  | 10.18 | 9.85  |
| 2.42 | 10.26 | 4.79 | 9.03  | 5.36 | 9.9   | 8.46  | 10.12 | 9.03  |
| 1.84 | 9.86  | 3.43 | 9.13  | 5.38 | 9.98  | 8.54  | 10.39 | 9.56  |
| 1.43 | 8.73  | 3.43 | 9.8   | 5.62 | 10.41 | 9.68  | 10.58 | 10.09 |
| 2.09 | 8.53  | 2.09 | 9.63  | 5.44 | 10.19 | 9.21  | 10.62 | 10.29 |
| 0.4  | 8.65  | 3.72 | 9.98  | 6.01 | 10.57 | 9.49  | 11.15 | 10.19 |
| 8.49 | 10.12 | 8.33 | 15.2  | 5.16 | 10.56 | 11.67 | 10.16 | 5.16  |
| 3.72 | 9.4   | 2.94 | 8.15  | 5.47 | 9.25  | 7.84  | 8.78  | 6.82  |
| 4.34 | 9.07  | 4.44 | 9.3   | 4.99 | 9.99  | 8.97  | 10.3  | 8.47  |
| 6.22 | 9.5   | 5.7  | 10.44 | 4.88 | 10.47 | 9.82  | 10.57 | 9.07  |
| 5.99 | 9.31  | 4.23 | 11.48 | 3.71 | 10.91 | 10.51 | 11.01 | 9.28  |
| 4.24 | 8.79  | 7.1  | 10.47 | 6.13 | 10.67 | 9.85  | 12.03 | 12.03 |
| 1    | 9.28  | 3.58 | 9.09  | 2.58 | 8.41  | 7.95  | 8.34  | 7.52  |
| 2.86 | 9.4   | 2.44 | 8.78  | 2.86 | 0.86  | 7.2   | 7.52  | 7.61  |
| 2.77 | 8.93  | 1.77 | 8.24  | 3.35 | 4.35  | 7.44  | 7.55  | 7.44  |
| 4.59 | 7.53  | 4.47 | 8.93  | 5.84 | 9.29  | 8.53  | 10.72 | 10.94 |
| 3.18 | 7.77  | 4.23 | 9.16  | 5.4  | 10.62 | 8.81  | 11.59 | 11.28 |
| 2.43 | 8.17  | 4.75 | 9.17  | 4.69 | 10.05 | 8.62  | 11.35 | 9.92  |
| 5.01 | 7.35  | 7.16 | 9.09  | 5.65 | 9.77  | 8.92  | 12.67 | 11.69 |
| 2.77 | 8.54  | 1.45 | 9.07  | 2.77 | 7.04  | 8.11  | 7.74  | 6.94  |
| 1.25 | 8.47  | 0.25 | 8.25  | 1.25 | 5.81  | 6.69  | 6.82  | 6.52  |
| 0.93 | 8.68  | 0.34 | 8.33  | 0.93 | 6.1   | 7.02  | 7.03  | 6.68  |
| 0    | 8.56  | 0    | 8.2   | 0    | 0     | 5.78  | 6.87  | 7.04  |
| 1.34 | 8.46  | 2.92 | 8.22  | 1.34 | 5.58  | 7.38  | 7.68  | 7.01  |
| 2.68 | 8.51  | 1.1  | 7.98  | 3.1  | 6.42  | 6.93  | 7.29  | 6.71  |
| 0.31 | 8.34  | 1.31 | 8.21  | 2.31 | 6.72  | 6.86  | 7.29  | 7.04  |
| 2.41 | 7.41  | 3.41 | 7.58  | 2.41 | 4     | 6.22  | 6.22  | 6.32  |
| 2.06 | 9.26  | 3.38 | 9.2   | 3.06 | 6.67  | 7.97  | 7.93  | 7.89  |
| 1.91 | 9.6   | 0.91 | 9.71  | 1.33 | 2.13  | 7.65  | 8.14  | 8.12  |
| 3.19 | 9.5   | 2.45 | 9.42  | 1.87 | 8.73  | 9.16  | 8.69  | 7.21  |
| 1.75 | 9.31  | 1.75 | 9.36  | 2.07 | 7.05  | 8.11  | 8.17  | 7.65  |
| 3.55 | 8.87  | 4.82 | 9.12  | 2.3  | 9.14  | 8.6   | 10.06 | 8.49  |
| 2.62 | 9.33  | 3.1  | 9.13  | 1.3  | 8.36  | 7.92  | 8.94  | 7.4   |
| 2.29 | 9.15  | 0.71 | 8.37  | 3.29 | 2.29  | 7.41  | 7.87  | 7.34  |
| 0.9  | 8.93  | 4.22 | 8.81  | 1.9  | 8.28  | 7.77  | 8.89  | 7.96  |
| 2.72 | 8.81  | 1.5  | 7.73  | 3.23 | 8.66  | 8.33  | 9.9   | 9.45  |
| 2.07 | 8.85  | 1.74 | 7.76  | 3.44 | 9.11  | 7.96  | 10.29 | 9.68  |
| 2.04 | 9.16  | 2.84 | 8.03  | 3.62 | 9.08  | 8.06  | 9.81  | 9.35  |

<https://mc.manuscriptcentral.com/gut>

1  
2  
3  
4  
5  
6  
7  
8  
9  
10  
11  
12  
13  
14  
15  
16  
17  
18  
19  
20  
21  
22  
23  
24  
25  
26  
27  
28  
29  
30  
31  
32  
33  
34  
35  
36  
37  
38  
39  
40  
41  
42  
43  
44  
45  
46  
47  
48  
49  
50  
51  
52  
53  
54  
55  
56  
57  
58  
59  
60

|       |       |      |       |      |       |       |       |       |
|-------|-------|------|-------|------|-------|-------|-------|-------|
| 2.27  | 8.48  | 1.85 | 7.94  | 2.27 | 8.4   | 8.09  | 9.36  | 9.6   |
| 4.1   | 9.96  | 4.98 | 9.3   | 4.69 | 10.03 | 9.22  | 11.9  | 11.16 |
| 4.04  | 9.95  | 6.18 | 9.35  | 4.35 | 11.5  | 9.45  | 11.43 | 10.49 |
| 2.74  | 9.91  | 1.74 | 8.46  | 3.55 | 10.27 | 8.41  | 9.98  | 9.83  |
| 1.76  | 9.87  | 1.76 | 8.52  | 3.04 | 10.52 | 8.55  | 9.98  | 9.71  |
| 8.24  | 9.2   | 4.89 | 9.74  | 6.41 | 10.42 | 9.53  | 11.38 | 10.53 |
| 4.65  | 10.13 | 5.3  | 10.29 | 5.89 | 11.47 | 10.42 | 11.44 | 9.43  |
| 3.79  | 10.06 | 4.98 | 9.5   | 5.76 | 11.12 | 10.04 | 11.41 | 8.61  |
| 3.33  | 9.94  | 5.44 | 11.15 | 5.27 | 11.69 | 10.81 | 12.12 | 9.42  |
| 4.46  | 10.27 | 3.09 | 10.37 | 5.76 | 10.96 | 8.98  | 11.66 | 11.37 |
| 2.49  | 10.34 | 3.75 | 10.2  | 6.38 | 10.68 | 9.32  | 12.01 | 11    |
| 3.19  | 10.25 | 5.91 | 10.28 | 6.59 | 11.2  | 9.3   | 11.7  | 11.48 |
| 3.23  | 10.45 | 3.65 | 10.21 | 5.65 | 11.08 | 9.21  | 11.38 | 10.66 |
| 2.94  | 8.53  | 1.8  | 9     | 4.87 | 9.46  | 8.84  | 9.2   | 9.74  |
| 4.15  | 8.72  | 6.33 | 8.98  | 5.64 | 10.48 | 9.18  | 10.17 | 8.75  |
| 3.85  | 8.75  | 5.32 | 10.72 | 5.57 | 10.78 | 9.65  | 11.92 | 9.78  |
| 3.7   | 8.29  | 4.75 | 10.02 | 5.08 | 10.15 | 10.09 | 10.39 | 10.27 |
| 2.25  | 9.27  | 5.25 | 9.56  | 5.13 | 10.97 | 9.12  | 10.67 | 10.84 |
| 3.52  | 8.72  | 4.43 | 10.13 | 7.27 | 11.8  | 9.46  | 11.49 | 10.8  |
| 3.74  | 9.77  | 3.84 | 9.02  | 4.88 | 9.47  | 9.61  | 11.12 | 11.09 |
| 2.54  | 9.72  | 4.75 | 9.53  | 5.63 | 12.16 | 8.98  | 10.97 | 11.14 |
| 2.8   | 8.96  | 2.65 | 9.55  | 4.65 | 12.64 | 8.76  | 10.06 | 9.04  |
| 3.11  | 9.42  | 4.81 | 9.39  | 6.15 | 9.93  | 8.9   | 11.31 | 9.22  |
| 2.93  | 9.41  | 1.93 | 9.3   | 5.93 | 10.03 | 9.06  | 10.49 | 9.76  |
| 5.96  | 10.5  | 8.51 | 12.18 | 6.47 | 11.35 | 10.7  | 14.12 | 9.1   |
| 4.61  | 8.1   | 4.27 | 8.83  | 4.17 | 8.47  | 8.54  | 10.43 | 8.32  |
| 2.38  | 7.73  | 4.96 | 8.2   | 5.65 | 9.82  | 8.59  | 11.04 | 7.41  |
| 4.41  | 8.33  | 2.09 | 7.83  | 5.22 | 9.53  | 7.41  | 9.87  | 8.46  |
| 4.9   | 7.15  | 4.9  | 8.89  | 6.76 | 10.2  | 8.19  | 10.72 | 9.39  |
| 1.76  | 8.28  | 1.76 | 7.76  | 4.08 | 5.08  | 6.34  | 7.59  | 7.04  |
| 1.72  | 8.16  | 4.63 | 8.27  | 4.04 | 9.13  | 7.6   | 8.27  | 7.38  |
| 0.88  | 8.39  | 0.88 | 7.22  | 2.88 | 2.47  | 6.41  | 7.05  | 7.03  |
| 3.76  | 8.37  | 2.54 | 7.42  | 3.28 | 6.24  | 6.86  | 7.53  | 7.09  |
| 2.36  | 8.14  | 1.94 | 7.79  | 4.11 | 7.54  | 7.93  | 8.96  | 8.01  |
| 1.98  | 8.33  | 3.57 | 7.8   | 4.36 | 7.79  | 7.81  | 8.98  | 7.24  |
| 1.35  | 8.08  | 4.67 | 8.01  | 5.09 | 8.06  | 8.03  | 9.72  | 8.59  |
| 2.34  | 7.86  | 5.12 | 8.41  | 5    | 9.23  | 7.82  | 10.59 | 9.94  |
| 4.44  | 8.35  | 3.81 | 10.53 | 4.26 | 8.61  | 10.2  | 10.14 | 6.91  |
| 7.32  | 8.6   | 6.55 | 9.13  | 5.63 | 11.37 | 9.3   | 10.32 | 9.13  |
| 2     | 9.52  | 5.42 | 9.83  | 5.33 | 10.82 | 10.13 | 10.11 | 6.79  |
| 5.55  | 10.3  | 6.93 | 12.89 | 4.23 | 11.54 | 11.33 | 11.15 | 7.23  |
| 6.78  | 9.22  | 3.68 | 9.08  | 4.32 | 9.17  | 9.1   | 10.04 | 9.75  |
| 6.51  | 9.76  | 7.32 | 12.95 | 6.83 | 11.48 | 11.25 | 10.87 | 7.97  |
| 2.45  | 9.35  | 4.04 | 9.83  | 5.94 | 10.62 | 9.46  | 10.82 | 10.63 |
| 3.26  | 9.08  | 3.1  | 10.24 | 6.24 | 10.78 | 9.24  | 11.54 | 11.69 |
| 10.05 | 8.93  | 1.68 | 8.02  | 3    | 7.28  | 8.17  | 7.61  | 6.41  |
| 9.71  | 9.34  | 4.07 | 9.43  | 5.82 | 10.32 | 9.16  | 10.96 | 9.05  |
| 9.44  | 9.33  | 4.28 | 9.11  | 5.56 | 9.54  | 9.03  | 10.51 | 8.88  |
| 8.97  | 8.85  | 3.58 | 8.93  | 6.06 | 9.48  | 8.73  | 10.83 | 8.44  |
| 2.74  | 8.39  | 3.89 | 8.96  | 3.66 | 10.65 | 9.03  | 11.98 | 10.6  |
| 3.11  | 7.78  | 5.66 | 8.19  | 4.23 | 10.22 | 8.71  | 10.7  | 9.74  |
| 2.83  | 7.97  | 4.59 | 8.24  | 4.42 | 10.03 | 8.51  | 10.86 | 9.48  |

<https://mc.manuscriptcentral.com/gut>

1  
2  
3  
4  
5  
6  
7  
8  
9  
10  
11  
12  
13  
14  
15  
16  
17  
18  
19  
20  
21  
22  
23  
24  
25  
26  
27  
28  
29  
30  
31  
32  
33  
34  
35  
36  
37  
38  
39  
40  
41  
42  
43  
44  
45  
46  
47  
48  
49  
50  
51  
52  
53  
54  
55  
56  
57  
58  
59  
60

|       |      |      |       |      |       |       |       |       |
|-------|------|------|-------|------|-------|-------|-------|-------|
| 4.49  | 8.19 | 6.08 | 9.23  | 3.37 | 10.5  | 9.49  | 11.3  | 8.78  |
| 3.42  | 8.42 | 2.68 | 9.9   | 5.1  | 9.96  | 9.45  | 10.28 | 11.35 |
| 1.59  | 8.09 | 6.2  | 8.6   | 5.67 | 10.39 | 9.66  | 9.93  | 8.43  |
| 0.49  | 8.47 | 2.81 | 8.38  | 5.44 | 10.22 | 9.8   | 9.23  | 8.06  |
| 2.55  | 8.55 | 3.14 | 10.14 | 3.55 | 9.63  | 9.14  | 9.87  | 7.31  |
| 2.37  | 8.39 | 5.18 | 9.13  | 4.02 | 10.16 | 8.34  | 11.2  | 10.36 |
| 0.65  | 8.48 | 2.24 | 8.66  | 2.77 | 10.13 | 7.35  | 9.17  | 7.73  |
| 0.94  | 8.67 | 2.81 | 8.69  | 2.52 | 10.5  | 7.39  | 8.94  | 7.19  |
| 0.27  | 8.64 | 0.27 | 8.2   | 3.27 | 2.27  | 6.73  | 7.18  | 6.97  |
| 1.96  | 8.24 | 5.64 | 8.65  | 3.55 | 9.66  | 8.51  | 9.75  | 8.48  |
| 4.61  | 8.62 | 3.82 | 9.76  | 5.3  | 9.99  | 9.68  | 10.44 | 10.63 |
| 3.89  | 8.47 | 4.47 | 8.73  | 5.47 | 9.67  | 8.98  | 9.85  | 9.26  |
| 3.47  | 8.59 | 3.76 | 9.3   | 5.59 | 10.34 | 9.79  | 10.42 | 9.06  |
| 4.03  | 8.44 | 4.03 | 8.96  | 5.37 | 9.64  | 9.7   | 11.46 | 10.95 |
| 6.24  | 9.63 | 7    | 12.57 | 5.35 | 10.95 | 11.71 | 12.23 | 10.5  |
| 10.43 | 8.97 | 3.26 | 9.5   | 4.66 | 9.1   | 8.67  | 9.64  | 8.29  |
| 8.08  | 8.38 | 3.93 | 8.26  | 4.91 | 8.89  | 8.36  | 9.4   | 7.62  |
| 10.62 | 9.1  | 3.34 | 9.64  | 4.15 | 9.25  | 8.82  | 9.86  | 8.16  |

|    | THBS4 | THY1 | TIE1 | TIMP1 | TIMP2 | TIMP4 | TJP2 | TJP3  | TLR4 |
|----|-------|------|------|-------|-------|-------|------|-------|------|
| 1  |       |      |      |       |       |       |      |       |      |
| 2  |       |      |      |       |       |       |      |       |      |
| 3  | 7.91  | 8.22 | 7.02 | 11.31 | 8.63  | 6.72  | 7.14 | 8.5   | 7.88 |
| 4  | 5.99  | 8.07 | 6.98 | 10.44 | 9.77  | 5.9   | 7.95 | 9.64  | 7.67 |
| 5  | 6.35  | 8.04 | 7.03 | 9.86  | 9.52  | 6.37  | 7.55 | 9.19  | 7.69 |
| 6  | 10.36 | 9.01 | 8.13 | 11.53 | 11.38 | 4.64  | 7.79 | 9.57  | 7.82 |
| 7  | 5.01  | 7.03 | 7.26 | 2.01  | 7.56  | 8.4   | 5.76 | 9.35  | 8.7  |
| 8  | 6.74  | 8.5  | 6.54 | 9.88  | 10.24 | 6     | 6.6  | 8.67  | 7.71 |
| 9  | 3.83  | 8.37 | 7.02 | 10.37 | 10.06 | 6.17  | 6.85 | 8.48  | 7.72 |
| 10 | 8.63  | 8.99 | 7.18 | 10.63 | 11.52 | 4.48  | 7.08 | 9.8   | 8.37 |
| 11 | 8.13  | 9.19 | 6.78 | 12.34 | 10.26 | 4.83  | 7.37 | 8.84  | 8.56 |
| 12 | 6.32  | 8.28 | 6.51 | 10.68 | 9.3   | 5.91  | 7.64 | 9.08  | 7.02 |
| 13 | 7.26  | 8.53 | 6.51 | 10.87 | 9.76  | 3.38  | 8.13 | 9.42  | 7.26 |
| 14 | 9.11  | 9.31 | 7.52 | 12.05 | 10.48 | 4.49  | 7.95 | 8.92  | 7.94 |
| 15 | 5.86  | 8.09 | 6.48 | 9.78  | 9.06  | 6.6   | 7.86 | 9.29  | 8.77 |
| 16 | 5     | 9.14 | 7.51 | 10.19 | 10.13 | 6.58  | 7.16 | 8.69  | 8.43 |
| 17 | 10.54 | 8.76 | 7.92 | 9.93  | 11.06 | 5.67  | 6.72 | 9.59  | 9.77 |
| 18 | 7.48  | 8.44 | 7.51 | 11.92 | 9.84  | 6.62  | 7.54 | 8.72  | 8.04 |
| 19 | 8.56  | 8.52 | 6.87 | 10.93 | 10.5  | 6.46  | 7.12 | 9.06  | 7.7  |
| 20 | 9.5   | 8.74 | 7.29 | 10.81 | 10.87 | 6.83  | 7.07 | 9.2   | 8.08 |
| 21 | 8.78  | 9.25 | 8.2  | 10.52 | 10.18 | 3.22  | 7.77 | 10.17 | 8.23 |
| 22 | 7.79  | 9.12 | 7.41 | 11.16 | 10.02 | 3.31  | 8.07 | 9.75  | 7.79 |
| 23 | 10.78 | 9.35 | 8.09 | 11.62 | 10.39 | 3.96  | 7.57 | 9.17  | 8.35 |
| 24 | 9.57  | 9.06 | 7.14 | 11.37 | 11.22 | 5.73  | 8.31 | 9.72  | 7.18 |
| 25 | 6.29  | 8.19 | 6.99 | 11.2  | 11.03 | 5.98  | 7.97 | 9.75  | 6.87 |
| 26 | 10.43 | 8.75 | 6.74 | 11.52 | 11.4  | 5.57  | 8.05 | 9.63  | 7.06 |
| 27 | 8.85  | 6.84 | 5.95 | 9.84  | 8.56  | 5.13  | 6.85 | 7.15  | 7.04 |
| 28 | 5.77  | 7.07 | 5.96 | 9.18  | 8.52  | 2.94  | 8.21 | 10.75 | 6.73 |
| 29 | 6.5   | 7.11 | 6.13 | 9.22  | 8.66  | 3.84  | 7.95 | 10.48 | 6.59 |
| 30 | 5.94  | 7.2  | 6.64 | 8.93  | 8.75  | 6.18  | 7.59 | 10.15 | 7.45 |
| 31 | 6.07  | 7.85 | 6.56 | 10.1  | 8.33  | 6.36  | 7.78 | 9.01  | 7.44 |
| 32 | 9.33  | 8.16 | 7.14 | 10.68 | 9.44  | 6.47  | 7.7  | 9.56  | 7.93 |
| 33 | 7.79  | 7.64 | 6.77 | 10.67 | 8.82  | 6.37  | 8.04 | 9.09  | 7.85 |
| 34 | 9.58  | 8.33 | 7.57 | 9.77  | 9.2   | 6.99  | 7.38 | 9.35  | 8.04 |
| 35 | 5.79  | 7.52 | 7.86 | 9.5   | 8.43  | 6.96  | 5.41 | 7.88  | 8.73 |
| 36 | 11.82 | 9.88 | 7.57 | 12.88 | 11.02 | 3.87  | 8.47 | 9.27  | 7.75 |
| 37 | 9.38  | 9    | 7.05 | 11.75 | 10.3  | 3.31  | 8.95 | 9.94  | 7.2  |
| 38 | 11.65 | 9.58 | 7.91 | 12.19 | 10.86 | 4.99  | 8.61 | 9.79  | 7.69 |
| 39 | 4.35  | 7.52 | 6.49 | 10.46 | 9     | 3.45  | 5.65 | 6.45  | 8.25 |
| 40 | 6.73  | 7.61 | 6.05 | 10.69 | 9.28  | 3.21  | 6.7  | 6.9   | 8.17 |
| 41 | 7.46  | 8.34 | 6.54 | 10.43 | 9.83  | 3.17  | 5.86 | 5.92  | 8.17 |
| 42 | 8.67  | 7.89 | 6.27 | 10.84 | 9.26  | 4.44  | 6.14 | 5.17  | 8.24 |
| 43 | 5.9   | 8.04 | 6.92 | 10.62 | 8.67  | 6.27  | 5.9  | 8.12  | 7.57 |
| 44 | 7.15  | 8    | 6.6  | 9.24  | 9.52  | 5.96  | 6.27 | 8     | 7.25 |
| 45 | 6.41  | 7.4  | 6.61 | 8.58  | 9.03  | 6.56  | 6.17 | 7.99  | 7.48 |
| 46 | 4.9   | 7.78 | 5.75 | 8.59  | 9.68  | 5.34  | 6.85 | 8.39  | 6.84 |
| 47 | 7.18  | 6.67 | 7.11 | 7.5   | 10.01 | 2.86  | 6.86 | 8.45  | 6.56 |
| 48 | 7.25  | 7.45 | 5.87 | 9.81  | 9.74  | 4.77  | 7.59 | 8.93  | 6.58 |
| 49 | 8.83  | 8.79 | 6.81 | 10.84 | 10.04 | 4.25  | 7.12 | 8.72  | 6.95 |
| 50 | 10.19 | 9.33 | 6.81 | 11.38 | 10.93 | 4.85  | 6.74 | 7.98  | 7.03 |
| 51 | 8.62  | 8.85 | 6.72 | 11.84 | 11.16 | 5.22  | 8.11 | 9.33  | 8.67 |
| 52 | 7.13  | 9.32 | 6.84 | 11.91 | 10.95 | 2.33  | 7.96 | 9.02  | 8.33 |
| 53 | 6.64  | 8.23 | 6.52 | 10.58 | 10.32 | 2.08  | 7.91 | 9.51  | 8.15 |

<https://mc.manuscriptcentral.com/gut>



|    |       |      |      |       |       |      |      |       |      |
|----|-------|------|------|-------|-------|------|------|-------|------|
| 1  |       |      |      |       |       |      |      |       |      |
| 2  | 8.95  | 9.27 | 6.87 | 11.98 | 10.98 | 2.4  | 7.77 | 8.75  | 8.65 |
| 3  | 4.94  | 8.26 | 6.6  | 11.13 | 8.92  | 6.66 | 8.22 | 8.83  | 7.77 |
| 4  | 4.44  | 8.44 | 6.76 | 10.54 | 9.07  | 6.55 | 8.04 | 8.22  | 7.99 |
| 5  | 4.65  | 8.19 | 6.77 | 10.61 | 9.33  | 6.77 | 8.06 | 8.67  | 8.06 |
| 6  | 8.63  | 8.28 | 6.57 | 11.24 | 9.23  | 6.93 | 8.15 | 8.22  | 8.19 |
| 7  | 7.36  | 8.3  | 7.33 | 11.37 | 9     | 5.75 | 8.89 | 9.33  | 7.69 |
| 8  | 8.05  | 8.17 | 6.85 | 10.43 | 10.02 | 4.57 | 9.02 | 9.71  | 7.31 |
| 9  | 5.05  | 7.72 | 5.96 | 9.66  | 8.41  | 3.96 | 9.49 | 9.74  | 6.15 |
| 10 | 9.57  | 8.7  | 6.72 | 11.32 | 10.34 | 4.96 | 9.45 | 9.81  | 7.27 |
| 11 | 9.1   | 7.66 | 5.71 | 10.78 | 8.86  | 2.39 | 8.03 | 8.55  | 7.07 |
| 12 | 6.56  | 7.73 | 6.24 | 10.34 | 9.35  | 3.13 | 7.86 | 9.35  | 6.97 |
| 13 | 6.4   | 7.76 | 5.65 | 10.18 | 9.05  | 2.62 | 8.1  | 9.33  | 6.54 |
| 14 | 8.71  | 7.89 | 5.81 | 10.89 | 9.49  | 3.15 | 7.9  | 8.91  | 6.81 |
| 15 | 6.74  | 8.47 | 7.47 | 8.47  | 9.47  | 9.96 | 5.15 | 10.51 | 8.96 |
| 16 | 6.11  | 7.81 | 6.98 | 8.67  | 10.49 | 8.08 | 6.46 | 9.68  | 9.05 |
| 17 | 6.21  | 7.65 | 6.93 | 9.26  | 9.9   | 7.54 | 6.2  | 8.57  | 8.56 |
| 18 | 5.45  | 8.52 | 7.96 | 1.83  | 8.9   | 9.58 | 6.81 | 10.77 | 9.85 |
| 19 | 4.86  | 8.1  | 8.22 | 0.77  | 8.47  | 9.32 | 6.68 | 10.51 | 9.92 |
| 20 | 2.46  | 7.58 | 6.35 | 11.13 | 8.16  | 6.16 | 8.5  | 9.17  | 7.51 |
| 21 | 2.72  | 6.76 | 6.28 | 11.76 | 7.99  | 5.99 | 8.84 | 9.6   | 7.39 |
| 22 | 4.76  | 7.41 | 6.72 | 11.2  | 8.79  | 6.29 | 8.26 | 9.29  | 7.69 |
| 23 | 9.86  | 8.91 | 7.33 | 11.69 | 10.4  | 4.9  | 9.07 | 9.25  | 7.06 |
| 24 | 9.45  | 8.23 | 6.94 | 11.38 | 10.02 | 5.53 | 8.97 | 9.37  | 7.57 |
| 25 | 10.71 | 8.26 | 7.12 | 10.92 | 9.57  | 6.51 | 8.84 | 8.36  | 8.31 |
| 26 | 6.13  | 8.51 | 6.79 | 10.58 | 10.21 | 3.96 | 8.34 | 10.16 | 7.71 |
| 27 | 6.06  | 9.32 | 7.04 | 11.24 | 11.1  | 4.43 | 8.12 | 10.25 | 7.69 |
| 28 | 7.03  | 9.64 | 7.12 | 12.16 | 11.47 | 4.01 | 7.98 | 10.05 | 7.57 |
| 29 | 4.36  | 8.23 | 6.68 | 11.05 | 9.34  | 5.61 | 6.51 | 8.02  | 7.52 |
| 30 | 7.6   | 8.73 | 6.81 | 11.59 | 9.61  | 6.17 | 6.5  | 7.73  | 7.07 |
| 31 | 7.56  | 8.44 | 7.15 | 11.31 | 9.38  | 6.49 | 6.56 | 7.99  | 7.68 |
| 32 | 10.25 | 9.05 | 7.1  | 11.81 | 9.59  | 7.39 | 7.71 | 9.25  | 8.84 |
| 33 | 6.22  | 8.37 | 6.89 | 11.5  | 9.33  | 6.84 | 8.09 | 9.76  | 8.9  |
| 34 | 4.99  | 8.16 | 7.02 | 10.93 | 9.1   | 7.46 | 7.88 | 10.07 | 8.79 |
| 35 | 9.5   | 9.02 | 7.26 | 11.45 | 10.41 | 6.59 | 7.67 | 8.45  | 7.87 |
| 36 | 7.12  | 8.58 | 7.15 | 10.85 | 10.06 | 6.79 | 7.93 | 9.02  | 7.9  |
| 37 | 9.06  | 9.52 | 7.21 | 11.82 | 10.55 | 6.84 | 7.13 | 8.62  | 8.05 |
| 38 | 7.8   | 8.42 | 7.49 | 11.21 | 9.74  | 7.02 | 7.28 | 8.89  | 8.22 |
| 39 | 7.8   | 8.42 | 7.49 | 11.21 | 9.74  | 7.02 | 7.28 | 8.89  | 8.22 |
| 40 | 8.92  | 7.32 | 6.66 | 9.64  | 10.29 | 7.11 | 8.06 | 10.32 | 7.9  |
| 41 | 9.6   | 8    | 7.3  | 10.27 | 10.45 | 7.32 | 7.53 | 9.81  | 8.21 |
| 42 | 10.14 | 8.78 | 7    | 11.32 | 11    | 6.92 | 7.84 | 9.72  | 8.1  |
| 43 | 5.26  | 7.26 | 7.45 | 9.42  | 7.67  | 7.5  | 5.91 | 8.02  | 8.07 |
| 44 | 8.83  | 8.31 | 7.17 | 11.04 | 9.66  | 6.84 | 7.3  | 8.55  | 8.17 |
| 45 | 8.6   | 7.95 | 7.28 | 11.06 | 9.53  | 6.12 | 7.75 | 9.38  | 7.55 |
| 46 | 9.94  | 8.05 | 7.31 | 10.35 | 9.51  | 6.92 | 6.86 | 8.79  | 8.45 |
| 47 | 8.5   | 8.87 | 6.86 | 10.89 | 10.33 | 4.12 | 7.86 | 9.26  | 7.63 |
| 48 | 5.12  | 7.91 | 6.43 | 9.83  | 9.62  | 5.08 | 7.93 | 9.6   | 6.4  |
| 49 | 8.39  | 8.82 | 7.68 | 10.59 | 10.75 | 4.22 | 7.41 | 9.68  | 8.69 |
| 50 | 6.86  | 8.14 | 7.4  | 10.73 | 8.52  | 6.75 | 6.32 | 8.35  | 7.94 |
| 51 | 10.86 | 9.27 | 7.85 | 11.48 | 10.7  | 7.03 | 6.22 | 8.77  | 7.83 |
| 52 | 10.91 | 9.08 | 7.34 | 11.37 | 10.69 | 6.7  | 6.36 | 8.69  | 7.85 |
| 53 | 5.1   | 7.62 | 6.59 | 9.17  | 9.5   | 6.68 | 7.29 | 9.24  | 7.73 |

<https://mc.manuscriptcentral.com/gut>

1  
2  
3  
4  
5  
6  
7  
8  
9  
10  
11  
12  
13  
14  
15  
16  
17  
18  
19  
20  
21  
22  
23  
24  
25  
26  
27  
28  
29  
30  
31  
32  
33  
34  
35  
36  
37  
38  
39  
40  
41  
42  
43  
44  
45  
46  
47  
48  
49  
50  
51  
52  
53  
54  
55  
56  
57  
58  
59  
60

|       |       |      |       |       |      |      |       |      |
|-------|-------|------|-------|-------|------|------|-------|------|
| 7.05  | 8.08  | 6.63 | 9.99  | 9.89  | 6.5  | 7.47 | 9.18  | 7.51 |
| 9.29  | 7.97  | 7.17 | 8.74  | 10.44 | 7.38 | 6.39 | 9.08  | 8.4  |
| 5.78  | 8.19  | 7.42 | 10.77 | 9.81  | 5.69 | 6.61 | 8.54  | 7.95 |
| 9.72  | 9.26  | 7.43 | 11.38 | 11.17 | 5.03 | 8.15 | 9.31  | 8.2  |
| 10.62 | 10.09 | 7.78 | 12.1  | 12.04 | 5.4  | 7.76 | 9.05  | 8.52 |
| 9.3   | 8.38  | 7.73 | 11.4  | 10.7  | 4.58 | 7.7  | 8.56  | 8.36 |
| 7.23  | 8.83  | 5.81 | 11.54 | 9.9   | 3.25 | 8.22 | 9.36  | 6.88 |
| 9.01  | 9.06  | 7.07 | 11.72 | 10.41 | 3.93 | 8.27 | 9.46  | 7.4  |
| 11.94 | 9.17  | 9.05 | 10.41 | 11.96 | 5.82 | 7.66 | 10.32 | 9.51 |
| 4.88  | 8.63  | 7.48 | 11.48 | 10.01 | 3.79 | 8.47 | 10.18 | 7.49 |
| 6.32  | 8.42  | 5.92 | 9.75  | 9.42  | 0.49 | 8.42 | 9.77  | 6.51 |
| 4.54  | 7.58  | 5.72 | 8.91  | 8.54  | 6.54 | 7.93 | 9.17  | 7.24 |
| 8.96  | 9.43  | 8.07 | 9.24  | 12.29 | 4.58 | 8.04 | 10.56 | 8.72 |
| 4.06  | 7.54  | 8.21 | 0.2   | 7.58  | 8.91 | 6.94 | 8.76  | 9.5  |
| 7.14  | 8.67  | 6.29 | 10.93 | 9.54  | 6.21 | 8.13 | 8.55  | 6.71 |
| 5.51  | 8.27  | 5.9  | 10.88 | 9.17  | 6.46 | 7.92 | 8.54  | 5.96 |
| 8.87  | 8.19  | 6.33 | 10.98 | 9.56  | 6.47 | 8.04 | 8.68  | 6.45 |
| 5.11  | 8.52  | 6.16 | 10.8  | 10.23 | 2.43 | 7.21 | 8.68  | 7.35 |
| 6.85  | 8.47  | 6.18 | 10.21 | 10.39 | 5.93 | 5.99 | 7.83  | 7.57 |
| 7.62  | 8.5   | 6.28 | 11.22 | 10.32 | 5.52 | 6.58 | 7.96  | 8.1  |
| 8.49  | 6.75  | 8.33 | 5.16  | 10.02 | 8.16 | 5.16 | 10.97 | 7.97 |
| 4.09  | 7.3   | 5.53 | 10.13 | 8.67  | 3.53 | 7.16 | 9.37  | 6.27 |
| 8.28  | 7.93  | 6.47 | 11.09 | 9.42  | 3.54 | 7.28 | 9.23  | 7.65 |
| 8.45  | 7.47  | 6.54 | 9.15  | 10.95 | 3.77 | 6.99 | 10.16 | 6.96 |
| 9.89  | 8.7   | 8.06 | 9.5   | 11.2  | 4.49 | 6.52 | 10.18 | 8    |
| 9.07  | 9.73  | 7.73 | 11.93 | 11.39 | 5.4  | 6.92 | 9.13  | 7.95 |
| 6.83  | 6.7   | 7.76 | 6.72  | 7.63  | 7.66 | 5.52 | 8.44  | 8.27 |
| 4.18  | 6.53  | 7.74 | 1.86  | 6.5   | 8.05 | 6.07 | 8.73  | 8.39 |
| 5.57  | 6.41  | 7.41 | 1.77  | 6.16  | 7.94 | 5.77 | 8.38  | 8.32 |
| 9.11  | 8.22  | 6.2  | 12.07 | 9.75  | 4.92 | 6.53 | 8.13  | 6.62 |
| 10.59 | 8.99  | 7.16 | 11.42 | 11.25 | 3.91 | 6.4  | 7.41  | 7.14 |
| 9.95  | 7.87  | 6.85 | 10.14 | 10.4  | 3.57 | 6.92 | 8.8   | 6.65 |
| 10.51 | 8.75  | 7.05 | 12.04 | 10.73 | 5.88 | 6.44 | 6.83  | 6.91 |
| 6.09  | 6.23  | 6.36 | 5.77  | 6.89  | 7.33 | 5.09 | 8.04  | 7.73 |
| 4.16  | 5.54  | 5.95 | 6.42  | 6.63  | 6.76 | 5.81 | 7.62  | 7.68 |
| 3.25  | 5.9   | 6.38 | 7.92  | 7.08  | 6.33 | 5.75 | 7.74  | 7.27 |
| 4.13  | 6.47  | 6.42 | 0     | 6.89  | 7.93 | 5.08 | 8.56  | 8.28 |
| 2.92  | 5.86  | 7.09 | 5.14  | 6.04  | 6.79 | 5.51 | 7.19  | 7.53 |
| 6.85  | 6.23  | 6.96 | 5.27  | 7.18  | 6.85 | 4.8  | 7.47  | 7.45 |
| 6.8   | 6.14  | 7.04 | 5.31  | 7.42  | 6.94 | 5.31 | 7.49  | 7.34 |
| 6.58  | 6.87  | 5.41 | 2.41  | 7.5   | 8.85 | 4.73 | 9.75  | 7.8  |
| 5.3   | 7.1   | 7.96 | 7.03  | 7.1   | 7.78 | 5.81 | 8.66  | 8.34 |
| 4.65  | 7.03  | 8.12 | 1.33  | 6.95  | 8.45 | 6.05 | 8.87  | 8.71 |
| 4.19  | 6.84  | 7.38 | 7.84  | 7.04  | 7.42 | 7.02 | 9.18  | 7.93 |
| 7     | 6.83  | 7.68 | 6.26  | 6.96  | 7.92 | 5.82 | 8.86  | 8.16 |
| 6.42  | 7.25  | 7.41 | 9.66  | 8.47  | 7.07 | 5.76 | 8.58  | 7.82 |
| 7.24  | 6.54  | 7.97 | 6.95  | 7.68  | 7.63 | 6.25 | 8.75  | 8.49 |
| 4.88  | 5.71  | 7.74 | 3.71  | 6.43  | 7.66 | 6.06 | 8.38  | 8.54 |
| 8.48  | 7.49  | 7.55 | 7.17  | 8.26  | 7.89 | 5.96 | 8.85  | 8.51 |
| 6.2   | 7.4   | 5.77 | 10.93 | 7.85  | 6.18 | 7.41 | 8.45  | 7.32 |
| 6.47  | 7.78  | 6.19 | 10.12 | 8.69  | 5.65 | 7.61 | 8.75  | 7.58 |
| 7.52  | 7.97  | 6.78 | 10.71 | 8.53  | 6.28 | 7.45 | 8.67  | 7.58 |

<https://mc.manuscriptcentral.com/gut>

1  
2  
3  
4  
5  
6  
7  
8  
9  
10  
11  
12  
13  
14  
15  
16  
17  
18  
19  
20  
21  
22  
23  
24  
25  
26  
27  
28  
29  
30  
31  
32  
33  
34  
35  
36  
37  
38  
39  
40  
41  
42  
43  
44  
45  
46  
47  
48  
49  
50  
51  
52  
53  
54  
55  
56  
57  
58  
59  
60

|       |      |      |       |       |      |      |       |      |
|-------|------|------|-------|-------|------|------|-------|------|
| 7.35  | 7.74 | 6.66 | 10.4  | 8.37  | 6.5  | 7.86 | 8.64  | 7.8  |
| 6.87  | 9.43 | 7.58 | 10.83 | 9.8   | 6.76 | 6.71 | 10.75 | 8.11 |
| 7.61  | 9.64 | 8.02 | 10.51 | 10.35 | 7.16 | 7.43 | 10.76 | 8.29 |
| 4.99  | 8.83 | 7.06 | 9.75  | 8.74  | 7.22 | 6.85 | 10.83 | 7.81 |
| 5.22  | 8.58 | 6.95 | 9.28  | 8.64  | 7.01 | 6.88 | 10.91 | 7.75 |
| 8.14  | 8.7  | 6.89 | 11.81 | 10.25 | 6.8  | 6.95 | 9.24  | 8.08 |
| 10.64 | 9.59 | 7.83 | 11.08 | 11.29 | 4.93 | 7.67 | 10.56 | 8.47 |
| 9.94  | 8.83 | 6.84 | 11.08 | 10.46 | 5.02 | 7.79 | 10.09 | 7.88 |
| 12.78 | 9.49 | 8.1  | 10.95 | 11.66 | 5.91 | 7.22 | 9.57  | 9.06 |
| 7.52  | 9.43 | 7.45 | 12.3  | 11.16 | 4.93 | 9.32 | 10.37 | 7.85 |
| 10.44 | 9.5  | 7.35 | 11.87 | 11.02 | 5.45 | 8.56 | 9.95  | 8.3  |
| 9.6   | 9.77 | 6.98 | 11.78 | 11.15 | 5.55 | 8.76 | 10.2  | 8.74 |
| 10.78 | 9.12 | 7.45 | 11.75 | 10.64 | 5.11 | 8.98 | 10.2  | 7.85 |
| 5.09  | 8.21 | 6.74 | 11.33 | 9.34  | 5.67 | 7.35 | 9.57  | 7.59 |
| 6.55  | 8.22 | 6.51 | 10.97 | 10.02 | 3.83 | 7.88 | 10.15 | 7.25 |
| 11.55 | 8.98 | 7.54 | 10.49 | 11.32 | 6.25 | 6.68 | 9.08  | 8.33 |
| 9.19  | 8.94 | 7.9  | 11.87 | 10.06 | 4.64 | 7.2  | 8.26  | 8.32 |
| 8.62  | 9.1  | 6.95 | 11.01 | 10.92 | 3.99 | 7.85 | 9.49  | 7.46 |
| 10.95 | 9.82 | 7.86 | 11.61 | 11.34 | 5.04 | 7.55 | 8.89  | 8.27 |
| 8.03  | 8.21 | 5.86 | 11.84 | 9.66  | 5.18 | 7.64 | 8.65  | 7.03 |
| 6.05  | 9.43 | 6.4  | 11.11 | 10.59 | 5.04 | 7.59 | 9.33  | 7.69 |
| 5.39  | 7.89 | 5.65 | 10.07 | 8.91  | 4.12 | 7.5  | 9.39  | 7.97 |
| 7.19  | 7.3  | 7.33 | 10.46 | 10.27 | 6.5  | 7.08 | 9.77  | 7.81 |
| 6.39  | 7.71 | 6.68 | 10.34 | 10.31 | 6.06 | 6.93 | 10.27 | 7.45 |
| 11.98 | 7.85 | 8.24 | 9.66  | 12.35 | 6.32 | 7.85 | 11.44 | 8.77 |
| 5.65  | 6.8  | 5.65 | 10.36 | 8.15  | 3.17 | 6.22 | 6.38  | 6.53 |
| 4.96  | 7.42 | 5.79 | 9.19  | 9.12  | 4.79 | 6.04 | 7.88  | 6.46 |
| 4.01  | 8.05 | 5.41 | 9.92  | 8.46  | 3.35 | 6.57 | 7.26  | 6.35 |
| 8.89  | 8.38 | 6.85 | 10.49 | 9.16  | 1.9  | 6.48 | 5.71  | 7.63 |
| 5.66  | 6.22 | 7.04 | 4.76  | 6.28  | 6.34 | 4.76 | 7.57  | 7.31 |
| 3.3   | 6.33 | 7.02 | 6.74  | 8.16  | 6.97 | 5.04 | 7.98  | 7.45 |
| 3.69  | 6.09 | 7.05 | 0.88  | 6.01  | 7.48 | 5.05 | 7.6   | 7.34 |
| 5.54  | 6.42 | 6.76 | 5.04  | 6.66  | 6.79 | 4.86 | 7.72  | 7.37 |
| 3.75  | 6.82 | 5.97 | 9.31  | 8.25  | 5.27 | 6.31 | 7.91  | 7.01 |
| 6.33  | 6.9  | 6.4  | 8.57  | 8.61  | 6.32 | 5.85 | 7.78  | 7.02 |
| 8.44  | 7.58 | 6.66 | 9.72  | 9.24  | 5.98 | 5.9  | 7.28  | 7.23 |
| 8.79  | 8.03 | 6.31 | 10.64 | 9.51  | 5.88 | 6.01 | 7.22  | 7.31 |
| 5.48  | 7.62 | 6.85 | 9.69  | 8.31  | 4.05 | 5.16 | 5.05  | 8.21 |
| 7.78  | 8.11 | 7.08 | 10.71 | 10.17 | 6.22 | 8.08 | 10.01 | 7.27 |
| 5.78  | 7.56 | 6.53 | 9.39  | 9.19  | 2.74 | 8.23 | 10.33 | 7.79 |
| 8.92  | 8.01 | 8.57 | 8.68  | 10.89 | 4.23 | 6.99 | 10.99 | 8.82 |
| 5.07  | 8.01 | 6.33 | 11.36 | 9.09  | 6.04 | 7.93 | 9.14  | 7.24 |
| 9.72  | 8.32 | 8.6  | 8.42  | 11.11 | 5.51 | 7.1  | 10.32 | 9.32 |
| 7.5   | 8.87 | 6.96 | 10.61 | 10.54 | 3.78 | 7.43 | 9.04  | 6.98 |
| 9.08  | 9.46 | 6.47 | 10.77 | 11.23 | 4.33 | 7.74 | 8.8   | 7.5  |
| 2.27  | 5.93 | 4.27 | 10.33 | 8.29  | 4.59 | 7.59 | 10.02 | 4    |
| 9.71  | 7.93 | 6.36 | 10.92 | 9.64  | 6.01 | 7.06 | 9.28  | 7.52 |
| 8.15  | 7.78 | 6.06 | 10.81 | 9.52  | 4.45 | 7.3  | 9.09  | 6.62 |
| 8.5   | 7.76 | 6.58 | 10.54 | 9.08  | 6.16 | 7.05 | 8.79  | 7.56 |
| 5.66  | 7.67 | 6.13 | 11.75 | 9.48  | 1.89 | 6.47 | 7.74  | 7.19 |
| 9.7   | 7.16 | 5.85 | 10.24 | 9.78  | 5.11 | 5.48 | 7.47  | 7.2  |
| 9.55  | 7.25 | 6.21 | 10.03 | 9.66  | 5.64 | 6.04 | 7.54  | 7.4  |

<https://mc.manuscriptcentral.com/gut>

|       |      |      |       |       |      |      |       |      |
|-------|------|------|-------|-------|------|------|-------|------|
| 11.09 | 7.28 | 6.25 | 9.98  | 10.48 | 3.79 | 6.31 | 7.97  | 7.11 |
| 6.93  | 9.86 | 5.85 | 11.74 | 10.19 | 6.71 | 7.01 | 8.33  | 7.03 |
| 5.76  | 7.72 | 5.83 | 10.48 | 8.94  | 6.01 | 6.78 | 7.14  | 7    |
| 5.19  | 7.74 | 5.62 | 10    | 8.94  | 6.46 | 7.03 | 7.62  | 6.37 |
| 9.21  | 6.68 | 7.31 | 3.88  | 9     | 7.95 | 5.36 | 8.35  | 8.31 |
| 8.57  | 7.78 | 5.75 | 11.27 | 9.04  | 4.42 | 7.48 | 7.5   | 7    |
| 7.49  | 6.49 | 4.02 | 10.24 | 7.33  | 3.87 | 7.27 | 7.67  | 5.94 |
| 7     | 6.32 | 4.4  | 9.92  | 6.99  | 4    | 7.25 | 7.49  | 5.76 |
| 3.44  | 6.15 | 7.03 | 0.27  | 5.89  | 7.67 | 5.32 | 7.96  | 7.89 |
| 8.44  | 7.57 | 6.91 | 9.34  | 8.88  | 6.43 | 6.11 | 8.04  | 7.77 |
| 7.92  | 8.15 | 6.18 | 11.74 | 10.08 | 3.82 | 7.43 | 8.83  | 7.44 |
| 11.81 | 8.26 | 6.64 | 10.61 | 10.12 | 5.41 | 7.14 | 8.71  | 7.5  |
| 11.98 | 8.19 | 6.92 | 10.27 | 10.39 | 5.3  | 6.93 | 8.92  | 7.63 |
| 12.34 | 9.65 | 6.48 | 11.76 | 10.52 | 5.85 | 6.85 | 8.02  | 8.16 |
| 8.45  | 7.4  | 7.79 | 7.59  | 10.31 | 6.45 | 6.35 | 10.68 | 8.87 |
| 6.12  | 7.09 | 5.39 | 10.09 | 9.37  | 4.84 | 7.18 | 7.91  | 7.34 |
| 5.52  | 7.03 | 6    | 10.05 | 8.55  | 5.56 | 6.6  | 7.68  | 7.21 |
| 6.85  | 7.03 | 5.71 | 9.94  | 9.5   | 4.45 | 7.15 | 8.1   | 7.59 |

1  
2  
3  
4  
5  
6  
7  
8  
9  
10  
11  
12  
13  
14  
15  
16  
17  
18  
19  
20  
21  
22  
23  
24  
25  
26  
27  
28  
29  
30  
31  
32  
33  
34  
35  
36  
37  
38  
39  
40  
41  
42  
43  
44  
45  
46  
47  
48  
49  
50  
51  
52  
53  
54  
55  
56  
57  
58  
59  
60

| TMC6  | TMEM100 | TMEM30B | TMPRSS2 | TMPRSS4 | TMPRSS6 | TNC  | TNF  | TNFRSF12A |
|-------|---------|---------|---------|---------|---------|------|------|-----------|
| 7.94  | 6.33    | 8.33    | 8.24    | 7.18    | 5.18    | 7.05 | 6.7  | 6.46      |
| 7.46  | 6.58    | 8.75    | 9.83    | 9.04    | 4.59    | 7.26 | 6.19 | 6.26      |
| 7.53  | 6.62    | 8.25    | 9.18    | 8.91    | 5.21    | 7.24 | 6.06 | 6.7       |
| 8.2   | 7.22    | 8.86    | 9.4     | 9.19    | 4.09    | 8.14 | 5.5  | 6.87      |
| 1.01  | 7.75    | 8.57    | 7.29    | 1.01    | 6.18    | 6.56 | 8.06 | 7.33      |
| 7.86  | 5.49    | 8.12    | 8.71    | 8.17    | 4.49    | 6.58 | 6.36 | 6.37      |
| 8.2   | 5.73    | 8.55    | 9.43    | 8.17    | 4.56    | 6.36 | 6.22 | 6.41      |
| 9.39  | 4.48    | 9.1     | 9.08    | 9.01    | 3.56    | 7.33 | 6.84 | 8.05      |
| 9.3   | 1.95    | 9.07    | 10.91   | 9.61    | 1.37    | 6.97 | 6.37 | 6.52      |
| 8.11  | 5.3     | 8.72    | 10.08   | 8.46    | 4.23    | 5.91 | 7.37 | 6.91      |
| 8.67  | 5.08    | 9.26    | 10.48   | 9.2     | 2.38    | 7.02 | 6.57 | 6.75      |
| 8.98  | 6.61    | 8.48    | 10.03   | 8.75    | 1.68    | 7.77 | 7.87 | 7.33      |
| 7.72  | 6.18    | 8.84    | 8.52    | 8.06    | 4.51    | 6.58 | 6.41 | 6.27      |
| 7.62  | 6.35    | 8.4     | 8.06    | 7.79    | 5.23    | 7.06 | 6.57 | 6.48      |
| 9.08  | 5.77    | 7.81    | 6.9     | 5.23    | 1.77    | 7.5  | 6.63 | 6.72      |
| 8.57  | 6.37    | 9.19    | 8.49    | 8.5     | 5.53    | 8.33 | 7.76 | 7.42      |
| 7.61  | 6.65    | 9.69    | 8.9     | 9       | 5.1     | 7.42 | 6.33 | 7.65      |
| 7.86  | 5.62    | 9.63    | 8.7     | 8.38    | 5.46    | 7.57 | 7.72 | 7.81      |
| 10.01 | 4.07    | 9.14    | 9.62    | 9.03    | 1.9     | 8.08 | 6.39 | 6.72      |
| 9.01  | 5.14    | 9.57    | 10.42   | 9.37    | 2.31    | 7.84 | 5.4  | 6.32      |
| 9.31  | 5.45    | 8.93    | 9.62    | 8.69    | 0.5     | 9.13 | 5.69 | 5.94      |
| 8.72  | 5.19    | 8.44    | 9.27    | 8.78    | 4.32    | 8.07 | 4.24 | 6.82      |
| 8.86  | 5.87    | 8.38    | 9.38    | 8.75    | 3.66    | 8.14 | 3.9  | 7.21      |
| 8.69  | 5.57    | 8.29    | 9.13    | 8.34    | 3.06    | 8.98 | 4.35 | 7.28      |
| 7.8   | 4.43    | 8.13    | 8.56    | 2.43    | 1.43    | 6.93 | 4.95 | 5.85      |
| 7.93  | 4.83    | 9.95    | 10.78   | 8.21    | 1.71    | 7.01 | 5.96 | 6.62      |
| 8.22  | 5.04    | 9.67    | 10.37   | 8.14    | 3.11    | 7    | 5.43 | 6.22      |
| 7.78  | 6.44    | 9.55    | 10.02   | 7.68    | 3.92    | 7.23 | 6.77 | 6.34      |
| 7.81  | 6.09    | 8.04    | 9.5     | 7.84    | 4.98    | 7.49 | 6.38 | 6.95      |
| 8.2   | 6.91    | 8.71    | 8.94    | 8       | 4.82    | 7.76 | 6.69 | 6.92      |
| 7.92  | 5.95    | 8.36    | 9.78    | 8.86    | 4.66    | 7.35 | 6.17 | 6.83      |
| 7.97  | 6.99    | 8.69    | 8.84    | 8       | 5.29    | 6.8  | 7.23 | 7.39      |
| 9.55  | 6.06    | 7.18    | 5.82    | 0.35    | 5.23    | 7.65 | 6.85 | 5.59      |
| 7.67  | 5.1     | 9.01    | 9.64    | 8.34    | 2.38    | 7.73 | 4.87 | 6.79      |
| 7.54  | 5.13    | 9.59    | 10.23   | 8.94    | 0.61    | 7.64 | 5.07 | 6.81      |
| 7.77  | 6.28    | 9.37    | 9.74    | 8.54    | 0.47    | 7.56 | 4.64 | 6.83      |
| 9.36  | 2.45    | 8.39    | 5.09    | 3.62    | 0.45    | 8.21 | 6.25 | 6.69      |
| 8.78  | 2.21    | 8.43    | 6.93    | 6.76    | 1.99    | 8.78 | 5.38 | 6.55      |
| 8.97  | 3.37    | 7.71    | 3.83    | 4.17    | 2.37    | 8.23 | 5.72 | 6.61      |
| 8.9   | 4.07    | 7.33    | 5.24    | 4.87    | 2.91    | 7.86 | 6.19 | 5.95      |
| 7.09  | 5.96    | 7.81    | 7.68    | 6.31    | 4.76    | 6.96 | 6.32 | 5.83      |
| 6.32  | 6.11    | 7.83    | 8.31    | 6.96    | 4.48    | 6.34 | 6.45 | 5.9       |
| 6.52  | 6.28    | 7.69    | 7.74    | 6.41    | 5.26    | 5.77 | 6.52 | 5.89      |
| 7.17  | 5.34    | 7.9     | 8.27    | 7.27    | 4.14    | 5.27 | 5.4  | 5.54      |
| 8.84  | 2.86    | 9.57    | 8.29    | 6.77    | 4.86    | 7.25 | 4.86 | 7.56      |
| 7.76  | 5.84    | 8.92    | 9.58    | 7.96    | 1.9     | 6.65 | 3.77 | 4.22      |
| 7.45  | 4.91    | 8.63    | 9.25    | 7.88    | 2.32    | 6.74 | 3.58 | 5.17      |
| 7.11  | 5.67    | 8.44    | 8.64    | 7.45    | 2.13    | 8.19 | 3.27 | 5.71      |
| 9.57  | 4.33    | 9.98    | 9.15    | 10.15   | 1.63    | 7.42 | 6.47 | 7.62      |
| 8.89  | 0.01    | 9.29    | 9.16    | 9.64    | 2.01    | 7.85 | 6.56 | 7.8       |
| 8.64  | 3.82    | 9.12    | 9.46    | 9.18    | 1.5     | 7.47 | 6.52 | 7.8       |

<https://mc.manuscriptcentral.com/gut>

1  
2  
3  
4  
5  
6  
7  
8  
9  
10  
11  
12  
13  
14  
15  
16  
17  
18  
19  
20  
21  
22  
23  
24  
25  
26  
27  
28  
29  
30  
31  
32  
33  
34  
35  
36  
37  
38  
39  
40  
41  
42  
43  
44  
45  
46  
47  
48  
49  
50  
51  
52  
53  
54  
55  
56  
57  
58  
59  
60

|       |      |       |       |       |      |      |      |      |
|-------|------|-------|-------|-------|------|------|------|------|
| 8.89  | 4.47 | 8.96  | 8.97  | 9.45  | 2.66 | 8.38 | 6.42 | 7.91 |
| 8.86  | 4.89 | 9.09  | 8.49  | 8.86  | 4.03 | 6.89 | 6.24 | 6.77 |
| 8.41  | 5.58 | 9.16  | 8.99  | 8.92  | 4.19 | 7.37 | 6.23 | 6.6  |
| 8.6   | 5.74 | 9.05  | 9.08  | 9.21  | 4.35 | 6.81 | 5.93 | 6.52 |
| 8.41  | 6.54 | 8.93  | 8.8   | 8.92  | 4.43 | 7.11 | 6.51 | 6.7  |
| 8.94  | 4.81 | 9.45  | 8.19  | 9.46  | 3.81 | 8.27 | 4.98 | 6.69 |
| 8.03  | 4.42 | 9.91  | 8.58  | 9.75  | 1.25 | 7.09 | 3.42 | 6.71 |
| 7.42  | 2.7  | 10.32 | 8.46  | 10.47 | 0.59 | 4.91 | 3.46 | 6.77 |
| 8.01  | 5.25 | 9.78  | 9.25  | 10.01 | 2.76 | 6.3  | 3.61 | 6.88 |
| 8.72  | 3.17 | 9.36  | 8.27  | 8     | 2.39 | 6.2  | 4.44 | 6.54 |
| 9.03  | 4.54 | 9.17  | 9.5   | 8.39  | 2.13 | 7.11 | 5.59 | 6.65 |
| 8.78  | 3.14 | 9.35  | 8.61  | 8.15  | 0.82 | 6.21 | 4.67 | 6.96 |
| 8.57  | 5.84 | 9.07  | 8.45  | 8.24  | 2.3  | 7.07 | 3.79 | 6.65 |
| 7.74  | 6.15 | 8.74  | 7.15  | 6.74  | 5.15 | 7.15 | 6.74 | 8.96 |
| 8.45  | 4.11 | 9.99  | 7.91  | 7.94  | 6.15 | 7.31 | 6.85 | 8.7  |
| 7.74  | 5.93 | 9.12  | 7.88  | 7.7   | 5.77 | 7.27 | 6.49 | 7.63 |
| 1.24  | 6.51 | 8.69  | 7.95  | 1.83  | 8.04 | 7.01 | 6.69 | 7.58 |
| 3.94  | 6.75 | 8.79  | 7.88  | 3.1   | 7.77 | 7.43 | 7.17 | 7.89 |
| 8.31  | 6.12 | 9.9   | 9.58  | 9.79  | 4.89 | 5.84 | 5.95 | 7.77 |
| 8.46  | 6.2  | 10.32 | 10.12 | 10.21 | 4.21 | 6.57 | 5.9  | 7.6  |
| 8.19  | 6.08 | 9.86  | 9.29  | 9.7   | 4.84 | 6.77 | 6.24 | 7.6  |
| 8.02  | 5.12 | 9.45  | 8.86  | 9.25  | 0.68 | 7.18 | 3.56 | 7.21 |
| 7.93  | 5.41 | 9.63  | 8.91  | 8.91  | 4.09 | 6.65 | 4.67 | 7.16 |
| 6.93  | 6.86 | 9.54  | 8.08  | 7.98  | 4.75 | 6.57 | 6.54 | 7.28 |
| 9.63  | 6.16 | 10.38 | 11.36 | 9.37  | 3.64 | 7.94 | 4.64 | 6.81 |
| 9.97  | 5.63 | 10.29 | 11.43 | 9.78  | 2.85 | 8.71 | 4.56 | 7.23 |
| 10.18 | 5.45 | 10.14 | 11.25 | 9.73  | 2.28 | 9.77 | 4.86 | 6.96 |
| 8.09  | 5.91 | 8.56  | 9.19  | 7.39  | 4.36 | 8.56 | 7.25 | 6.57 |
| 8.15  | 6.11 | 8.4   | 9.16  | 7.79  | 4.5  | 9.1  | 7.38 | 6.41 |
| 8.14  | 6.47 | 8.62  | 8.89  | 7.47  | 4.85 | 8.82 | 6.75 | 6.46 |
| 8.52  | 7.06 | 9.65  | 9.4   | 9.03  | 5.48 | 8.56 | 6.72 | 6.35 |
| 8.65  | 6.61 | 9.47  | 9.22  | 9.43  | 5.2  | 7.06 | 6.39 | 6.64 |
| 8.64  | 6.84 | 9.61  | 9.12  | 9.37  | 5.63 | 6.53 | 6.92 | 6.97 |
| 8.23  | 6.74 | 9.09  | 6.83  | 8.46  | 5.09 | 8.9  | 6.65 | 7.63 |
| 8.33  | 6.62 | 9.51  | 7.93  | 8.75  | 5.05 | 7.92 | 6.72 | 7.43 |
| 8.37  | 6.11 | 9.16  | 6.99  | 8.46  | 4.78 | 8.65 | 6.35 | 7.62 |
| 8.6   | 7.27 | 8.77  | 7.91  | 8.31  | 4.96 | 7.92 | 7.11 | 7.36 |
| 8.6   | 7.27 | 8.77  | 7.91  | 8.31  | 4.96 | 7.92 | 7.11 | 7.36 |
| 8.74  | 6.64 | 9.47  | 8.56  | 9.11  | 5.36 | 6.79 | 6.19 | 6.99 |
| 8.14  | 7.52 | 9.38  | 8.69  | 9.12  | 5.43 | 8.64 | 6.7  | 7.38 |
| 8.45  | 7.12 | 9.24  | 8.12  | 9.5   | 5.15 | 6.59 | 6.11 | 7.06 |
| 8.21  | 7.39 | 8.71  | 9.04  | 5.01  | 5.8  | 7.05 | 7.31 | 6.39 |
| 7.96  | 6.88 | 9.25  | 10.43 | 6.55  | 5.16 | 8.11 | 7.37 | 7    |
| 8.57  | 6.89 | 9.5   | 10.61 | 7.49  | 4.76 | 8.08 | 7.02 | 7.18 |
| 7.63  | 7.63 | 9.03  | 9.38  | 6.13  | 5.7  | 8.2  | 7.23 | 6.82 |
| 8.92  | 4.77 | 9.1   | 8.71  | 8.94  | 0.73 | 8.04 | 7.24 | 7.41 |
| 8.4   | 3.08 | 9.69  | 8.72  | 9.52  | 1.08 | 7.31 | 7.02 | 7.97 |
| 8.83  | 4.22 | 8.99  | 8.07  | 8.71  | 2.84 | 8.15 | 7.15 | 8.16 |
| 8.25  | 7.13 | 8.33  | 7.72  | 7.73  | 5.65 | 7.27 | 7.07 | 6.68 |
| 6.73  | 7.17 | 8.29  | 7.8   | 7.54  | 5.41 | 8.6  | 6.77 | 7.09 |
| 6.18  | 7.11 | 8.07  | 7.83  | 7.96  | 5.21 | 8.52 | 6.85 | 6.54 |
| 7.06  | 6.97 | 8.17  | 8.54  | 7.06  | 5.1  | 6.48 | 6.61 | 6.48 |

<https://mc.manuscriptcentral.com/gut>

|    |      |      |       |       |      |      |      |      |       |
|----|------|------|-------|-------|------|------|------|------|-------|
| 1  |      |      |       |       |      |      |      |      |       |
| 2  | 7.38 | 6.56 | 8.25  | 8.86  | 7.61 | 4.41 | 7.41 | 6.66 | 6.81  |
| 3  | 6.51 | 6.89 | 8.52  | 7.53  | 5.91 | 5.78 | 7.49 | 6.94 | 7.7   |
| 4  | 9.56 | 4.92 | 8.68  | 8.29  | 7.16 | 4.2  | 8.19 | 5.29 | 6.19  |
| 5  | 8.96 | 5.78 | 9.04  | 10    | 9.23 | 3.78 | 9.4  | 5.16 | 6.73  |
| 6  | 8.95 | 6.25 | 8.97  | 10.07 | 9.21 | 2.49 | 8.1  | 4.49 | 6.62  |
| 7  | 9.31 | 4.21 | 9.02  | 5.58  | 6.85 | 0.41 | 7.29 | 6.21 | 7.75  |
| 8  | 7.98 | 2.13 | 9.79  | 8.58  | 8.95 | 0    | 8.11 | 5.01 | 7.04  |
| 9  | 8.02 | 3.84 | 9.6   | 7.77  | 8.94 | 1.34 | 8.48 | 5.89 | 7.52  |
| 10 | 9.14 | 5.66 | 9.82  | 5.82  | 8.02 | 3.49 | 9.2  | 7.14 | 10.29 |
| 11 | 8.8  | 3.6  | 9.79  | 9.12  | 9.06 | 2.79 | 8.16 | 5.32 | 7.48  |
| 12 | 8.46 | 3.3  | 9.44  | 9.15  | 9.66 | 2.08 | 6.01 | 4.4  | 6.9   |
| 13 | 7.58 | 6.3  | 9.1   | 8.91  | 8.81 | 4.65 | 5.75 | 6.4  | 6.85  |
| 14 | 9.46 | 3.26 | 10.42 | 7.9   | 9.07 | 4.26 | 4.26 | 6.07 | 9.17  |
| 15 | 0    | 7.96 | 9.26  | 8.01  | 1.52 | 7.38 | 7.16 | 7.34 | 7.46  |
| 16 | 7.82 | 3.65 | 7.68  | 8.58  | 9.14 | 2.75 | 7.5  | 4.27 | 5.12  |
| 17 | 7.97 | 2.16 | 7.97  | 8.7   | 9.17 | 0    | 7.43 | 3.42 | 4.88  |
| 18 | 7.83 | 4.69 | 8.12  | 8.7   | 9.11 | 2.1  | 7.53 | 3.22 | 5.33  |
| 19 | 8.75 | 5.08 | 9.61  | 8.29  | 8.82 | 1.76 | 8.16 | 5.46 | 7.16  |
| 20 | 8.17 | 4.23 | 9.05  | 6.43  | 8.26 | 5.02 | 7.24 | 5.98 | 7.08  |
| 21 | 8.72 | 3.72 | 9.46  | 5.75  | 8.42 | 4.04 | 8.03 | 5.9  | 7.25  |
| 22 | 7.75 | 5.16 | 10.25 | 7.16  | 6.16 | 5.16 | 6.16 | 7.49 | 11.21 |
| 23 | 7.88 | 4.09 | 8.94  | 11.32 | 9.06 | 1.13 | 7.03 | 4.81 | 7.23  |
| 24 | 8.27 | 5.06 | 8.82  | 10.75 | 8.46 | 0.54 | 7.78 | 4.62 | 6.98  |
| 25 | 8.73 | 6.5  | 10.43 | 8.99  | 8.47 | 1.18 | 6.31 | 4.35 | 7.09  |
| 26 | 8.96 | 6.43 | 10.17 | 8.96  | 8.22 | 3.23 | 6.81 | 5.91 | 7.21  |
| 27 | 8.37 | 5.79 | 9.14  | 8.52  | 7.23 | 1.54 | 6.56 | 4.54 | 6.88  |
| 28 | 3.58 | 7.66 | 8.85  | 7.28  | 3    | 6.39 | 6.93 | 7.95 | 7.08  |
| 29 | 0.86 | 7.89 | 9     | 7.44  | 0.86 | 6.38 | 6.69 | 7.81 | 7.35  |
| 30 | 2.77 | 7.94 | 8.89  | 7.6   | 2.77 | 5.94 | 6.02 | 7.83 | 6.52  |
| 31 | 7.9  | 3.92 | 8.68  | 7.72  | 8.09 | 0.01 | 6.29 | 4.71 | 5.5   |
| 32 | 7.49 | 6.5  | 7.98  | 7.26  | 6.66 | 0    | 8.07 | 3.59 | 6.19  |
| 33 | 8.16 | 6.04 | 9.11  | 7.86  | 7.71 | 1.11 | 7.23 | 2.69 | 6.38  |
| 34 | 7.86 | 5.68 | 8.17  | 7.42  | 6.16 | 2.16 | 6.71 | 3.74 | 6.11  |
| 35 | 5.7  | 6.94 | 8.16  | 6.84  | 3.26 | 5.45 | 5.54 | 6.66 | 6.54  |
| 36 | 4.57 | 6.84 | 8.18  | 6.64  | 5.84 | 5.11 | 5.78 | 6.78 | 6.54  |
| 37 | 5.39 | 6.4  | 7.89  | 6.18  | 6.94 | 5.23 | 5.67 | 6.32 | 6.48  |
| 38 | 0.32 | 5.61 | 7.83  | 7.21  | 0    | 6.52 | 5.88 | 5.98 | 6.08  |
| 39 | 4.14 | 7.14 | 8.23  | 6.24  | 2.34 | 5.24 | 6.04 | 7.09 | 5.66  |
| 40 | 1.1  | 6.93 | 8.2   | 7.1   | 2.1  | 5.62 | 6.1  | 6.8  | 6.45  |
| 41 | 0.31 | 7    | 7.97  | 6.79  | 2.63 | 5.56 | 5.92 | 7.22 | 6.46  |
| 42 | 2.41 | 3.41 | 4.73  | 7.84  | 2.41 | 4.73 | 5.41 | 4    | 4.73  |
| 43 | 5.14 | 8.01 | 8.83  | 7.8   | 4.64 | 6.58 | 6.45 | 7.74 | 7.18  |
| 44 | 0    | 8.4  | 9.26  | 8.16  | 1.65 | 6.83 | 7.1  | 8.28 | 7.47  |
| 45 | 7.75 | 6.91 | 9.52  | 8.19  | 8.23 | 6.26 | 6.36 | 6.95 | 6.84  |
| 46 | 4.88 | 7.71 | 8.97  | 7.85  | 5.58 | 6.27 | 6.62 | 7.52 | 7.16  |
| 47 | 7.36 | 6.65 | 7.98  | 7.99  | 5.62 | 5.85 | 6.29 | 7.36 | 6.67  |
| 48 | 4.82 | 7.48 | 8.81  | 7.9   | 3.3  | 6.7  | 6.79 | 8.15 | 7.31  |
| 49 | 2.71 | 7.81 | 8.94  | 8.13  | 0.71 | 6.59 | 6.59 | 8.23 | 6.79  |
| 50 | 2.48 | 6.73 | 8.44  | 8.22  | 2.9  | 6.79 | 6.24 | 7.3  | 6.95  |
| 51 | 6.45 | 5.91 | 8.49  | 8.73  | 7.97 | 4.08 | 6.08 | 6.18 | 5.61  |
| 52 | 6.9  | 6.12 | 8.49  | 9.09  | 8.48 | 3.2  | 5.68 | 5.87 | 6.01  |
| 53 | 6.78 | 6.23 | 8.42  | 9.02  | 8.34 | 4.68 | 6.34 | 6.25 | 5.65  |

1  
2  
3  
4  
5  
6  
7  
8  
9  
10  
11  
12  
13  
14  
15  
16  
17  
18  
19  
20  
21  
22  
23  
24  
25  
26  
27  
28  
29  
30  
31  
32  
33  
34  
35  
36  
37  
38  
39  
40  
41  
42  
43  
44  
45  
46  
47  
48  
49  
50  
51  
52  
53  
54  
55  
56  
57  
58  
59  
60

|       |      |       |       |       |      |      |      |      |
|-------|------|-------|-------|-------|------|------|------|------|
| 6.36  | 6.22 | 8.67  | 8.98  | 8.43  | 5.13 | 5.76 | 6.22 | 5.02 |
| 9.6   | 5.32 | 9.48  | 8.07  | 7.91  | 3.84 | 6.86 | 6.04 | 6.69 |
| 9.04  | 6.58 | 9.8   | 9.17  | 8.21  | 5.21 | 9.01 | 6.03 | 6.73 |
| 9.47  | 6.41 | 9.66  | 8.52  | 7.82  | 4.99 | 7.25 | 6.83 | 7.12 |
| 9.52  | 6.19 | 9.74  | 8.62  | 7.79  | 4.24 | 6.75 | 6.6  | 7.08 |
| 9.7   | 5.85 | 8.92  | 7.43  | 9.25  | 5.26 | 6.99 | 6.6  | 7.02 |
| 9.73  | 6.54 | 10.02 | 9.02  | 9.4   | 2.84 | 8.26 | 6.27 | 7.95 |
| 9.53  | 5.86 | 9.89  | 9.36  | 9.34  | 3.44 | 8.07 | 5.34 | 7.44 |
| 9.7   | 8.35 | 9.32  | 8.23  | 8.63  | 3.33 | 9.16 | 6.13 | 7.4  |
| 9.81  | 4.93 | 9.66  | 10.44 | 10.43 | 4.09 | 7.96 | 5.93 | 8.36 |
| 9.02  | 5.78 | 9.9   | 9.16  | 8.46  | 4.07 | 7.04 | 5.97 | 7.65 |
| 9.32  | 4.38 | 9.9   | 9.29  | 8.2   | 4.19 | 7.65 | 6.47 | 8.23 |
| 9.24  | 4.82 | 10.22 | 9.32  | 9.12  | 3.65 | 7.54 | 5.15 | 7.71 |
| 8.11  | 5.36 | 8.6   | 9.62  | 8.03  | 4.23 | 7.13 | 6.09 | 6.77 |
| 8.27  | 5.15 | 9.08  | 10.59 | 8.43  | 0    | 7.1  | 4.76 | 7.34 |
| 7.96  | 8.05 | 8.33  | 8.39  | 6.77  | 3.85 | 8.24 | 6.32 | 7.88 |
| 9.73  | 4.52 | 8.36  | 7.4   | 6.76  | 2    | 7.9  | 6.6  | 5.24 |
| 8.45  | 5.47 | 9.61  | 8.65  | 8.93  | 0.67 | 8.2  | 4.75 | 6.64 |
| 8.87  | 5.84 | 8.5   | 7.79  | 8.01  | 0.52 | 9.82 | 5.84 | 7.09 |
| 8.51  | 4.51 | 8.97  | 6.06  | 9.42  | 1.93 | 6.51 | 3.74 | 6.88 |
| 8.48  | 2.87 | 8.15  | 8.37  | 8.39  | 2.13 | 8.85 | 5.24 | 6.48 |
| 9.09  | 3.39 | 8.43  | 9.37  | 9.04  | 2.29 | 6.81 | 4.34 | 6    |
| 8.57  | 6.72 | 9.36  | 8.91  | 7.68  | 5.35 | 6.96 | 5.96 | 6.83 |
| 9     | 6.32 | 9.59  | 9.89  | 7.27  | 4.74 | 7.14 | 5.74 | 7.1  |
| 9.28  | 8.47 | 10.53 | 8.06  | 7.74  | 7.79 | 9.77 | 5.15 | 9.7  |
| 8.28  | 0.36 | 6.67  | 6.79  | 5.22  | 1.36 | 6.89 | 4.06 | 3.17 |
| 7.13  | 5.18 | 7.62  | 8.1   | 6.67  | 3.11 | 7.08 | 2.79 | 4.88 |
| 7.65  | 2.57 | 7.46  | 8.58  | 6.61  | 2.09 | 6.16 | 2.35 | 4.22 |
| 7.07  | 4.71 | 7.51  | 8.39  | 5.48  | 1.9  | 9.45 | 1.9  | 5.22 |
| 1.76  | 6.8  | 8.01  | 6.4   | 1.76  | 5.22 | 6.08 | 6.85 | 6.01 |
| 4.42  | 7.04 | 8.1   | 7.18  | 5.24  | 5.24 | 7.21 | 6.55 | 6.27 |
| 0.88  | 7.5  | 7.92  | 7.09  | 0.88  | 5.69 | 6.28 | 6.91 | 5.79 |
| 3.28  | 7.33 | 7.89  | 6.79  | 3.54  | 5.54 | 5.76 | 6.84 | 6.31 |
| 7.27  | 5.31 | 8.54  | 7.93  | 7.43  | 3.06 | 6.49 | 5.68 | 6.1  |
| 6.77  | 6.42 | 7.89  | 7.82  | 6.14  | 4.42 | 6.64 | 6.3  | 5.89 |
| 6.86  | 6.43 | 7.81  | 7.59  | 6.21  | 4.35 | 6.8  | 6.14 | 5.88 |
| 6.49  | 6.31 | 7.78  | 7.24  | 6.37  | 4.25 | 6.94 | 6.14 | 6.4  |
| 10.37 | 2.94 | 4.88  | 1.94  | 0.35  | 0.35 | 8.08 | 8.01 | 2.94 |
| 8.67  | 5.46 | 8.91  | 9.11  | 8.66  | 4.92 | 6.63 | 5.05 | 5.46 |
| 8.3   | 4.81 | 10.09 | 10.48 | 9.6   | 2.42 | 5.91 | 5.33 | 6.83 |
| 9.57  | 5.04 | 10.05 | 8.38  | 8.86  | 3.82 | 7.28 | 6.93 | 8.85 |
| 7.96  | 5.29 | 9.23  | 7.07  | 9.05  | 4.29 | 6.8  | 5.33 | 5.65 |
| 8.9   | 4.51 | 9.94  | 8.76  | 8.6   | 4.51 | 7.51 | 6.83 | 8.42 |
| 8.12  | 5.57 | 9.26  | 8.75  | 9.11  | 0    | 8.38 | 3.96 | 5.78 |
| 7.98  | 6.55 | 9.04  | 8.5   | 8.87  | 0    | 8.55 | 3.74 | 6.58 |
| 6.77  | 0.68 | 8.28  | 9.05  | 8.3   | 4.49 | 3    | 2.68 | 3.85 |
| 7.69  | 4.38 | 8.01  | 8.3   | 7.95  | 4.38 | 8.28 | 5.57 | 5.94 |
| 7.62  | 5.03 | 7.91  | 8.35  | 8.26  | 3.08 | 7.88 | 4.08 | 5.63 |
| 7.31  | 6.23 | 7.92  | 8.05  | 6.81  | 5.01 | 7.89 | 6.61 | 6.01 |
| 7.96  | 3.82 | 7.57  | 8.09  | 7.38  | 0.57 | 8.52 | 4.22 | 5.24 |
| 6.7   | 5.57 | 7.77  | 7.56  | 6.78  | 3.7  | 7.26 | 5.11 | 4.85 |
| 6.77  | 5.69 | 7.61  | 7.6   | 6.54  | 4.08 | 6.86 | 5.39 | 4.92 |

<https://mc.manuscriptcentral.com/gut>



1  
2  
3  
4  
5  
6  
7  
8  
9  
10  
11  
12  
13  
14  
15  
16  
17  
18  
19  
20  
21  
22  
23  
24  
25  
26  
27  
28  
29  
30  
31  
32  
33  
34  
35  
36  
37  
38  
39  
40  
41  
42  
43  
44  
45  
46  
47  
48  
49  
50  
51  
52  
53  
54  
55  
56  
57  
58  
59  
60

|      |      |       |      |      |      |      |      |       |
|------|------|-------|------|------|------|------|------|-------|
| 7.37 | 6.79 | 7.89  | 7.76 | 7.22 | 0.79 | 8.44 | 3.11 | 5.31  |
| 7.49 | 4.56 | 8.52  | 8.42 | 8.11 | 4.1  | 7.59 | 3.68 | 6.19  |
| 7.43 | 4.98 | 7.9   | 7.94 | 8    | 3.59 | 7.03 | 4.49 | 5.76  |
| 7.67 | 4.19 | 8.21  | 8.22 | 7.82 | 3.29 | 5.57 | 3.66 | 5.49  |
| 5.64 | 7.05 | 8.34  | 6.64 | 4.72 | 5.64 | 6.51 | 6.8  | 6.91  |
| 8.39 | 3.47 | 7.74  | 9.26 | 7.75 | 0    | 7.07 | 3.81 | 5.87  |
| 8.42 | 1.65 | 8.73  | 9.7  | 7.78 | 1.39 | 5.13 | 2.65 | 5.35  |
| 8.37 | 1.35 | 8.8   | 9.53 | 7.98 | 0.94 | 5.33 | 3.88 | 5.46  |
| 0.27 | 7.41 | 8.66  | 7.07 | 2.27 | 5.83 | 6.42 | 7.35 | 6.44  |
| 6.9  | 6.52 | 8.16  | 7.96 | 5.7  | 5.15 | 7.04 | 6.79 | 6.07  |
| 8.52 | 5.05 | 8.65  | 7.93 | 8.45 | 1.65 | 7.69 | 4.78 | 5.86  |
| 7.62 | 5.14 | 8.97  | 8.33 | 7.94 | 2.47 | 7.04 | 5.35 | 6.5   |
| 8    | 5.83 | 9.17  | 7.99 | 7.8  | 2.62 | 7.62 | 4.47 | 5.43  |
| 7.75 | 5.21 | 8.66  | 6.77 | 7.34 | 4.03 | 6.54 | 4.71 | 6.15  |
| 7.79 | 3.54 | 12.25 | 6.87 | 7.87 | 4.13 | 6.35 | 7.35 | 10.16 |
| 8.23 | 4.05 | 8.14  | 7.6  | 7.48 | 3.39 | 6.62 | 5.01 | 5.5   |
| 7.37 | 5.23 | 7.75  | 8.17 | 5.09 | 4.23 | 7.12 | 5.89 | 5.12  |
| 8.6  | 4.15 | 8.16  | 7.59 | 7.44 | 3.21 | 6.31 | 5.45 | 5.48  |

1  
2  
3  
4  
5  
6  
7  
8  
9  
10  
11  
12  
13  
14  
15  
16  
17  
18  
19  
20  
21  
22  
23  
24  
25  
26  
27  
28  
29  
30  
31  
32  
33  
34  
35  
36  
37  
38  
39  
40  
41  
42  
43  
44  
45  
46  
47  
48  
49  
50  
51  
52  
53  
54  
55  
56  
57  
58  
59  
60

| TNFRSF1A | TNFSF10 | TNFSF12 | TNFSF13 | TNMD | TNN  | TNS1  | TNXB  | TOM1L1 |
|----------|---------|---------|---------|------|------|-------|-------|--------|
| 8.39     | 9.88    | 7.2     | 8.45    | 4.99 | 6.8  | 7.95  | 7.62  | 7.58   |
| 9.25     | 9.46    | 7.24    | 8.08    | 4.36 | 6.46 | 8.31  | 6.92  | 7.78   |
| 9.15     | 9.49    | 6.98    | 7.97    | 4.4  | 6.53 | 8.18  | 7.31  | 7.6    |
| 9.84     | 9.78    | 8.52    | 8.52    | 1.18 | 3.88 | 10.16 | 9.16  | 7.46   |
| 7.88     | 9.01    | 1.01    | 9.98    | 6.68 | 8.51 | 8.36  | 8.85  | 8.66   |
| 8.72     | 8.77    | 6.95    | 7.52    | 4.74 | 6.7  | 8.58  | 7.21  | 8.01   |
| 9.05     | 8.94    | 7.03    | 7.95    | 4.56 | 6.69 | 8.28  | 7.04  | 8.2    |
| 10.06    | 10.11   | 8.62    | 9.54    | 0.39 | 2.72 | 9.27  | 7.21  | 7.69   |
| 9.49     | 9.41    | 8.73    | 9.9     | 1.37 | 2.69 | 8.94  | 6.37  | 7.17   |
| 8.92     | 9.47    | 6.66    | 8.19    | 3.72 | 5.86 | 7.55  | 6.51  | 7.83   |
| 9.39     | 9.16    | 7.61    | 8.52    | 1.38 | 2.7  | 8.23  | 6.65  | 7.68   |
| 9.84     | 9.77    | 7.9     | 8.4     | 2.27 | 3.68 | 9.51  | 8.22  | 7.45   |
| 8.84     | 8.83    | 6.45    | 7.85    | 5.51 | 6.23 | 7.72  | 7.47  | 8.54   |
| 9.07     | 8.26    | 6.81    | 7.95    | 5.72 | 6.76 | 8.12  | 7.34  | 8.14   |
| 10.41    | 10.21   | 9.48    | 10.58   | 1.77 | 4.09 | 10.01 | 9.74  | 6.52   |
| 9.11     | 8.84    | 7.42    | 8.76    | 4.4  | 6.67 | 8.69  | 8.01  | 7.67   |
| 9.2      | 8.93    | 7.38    | 8.46    | 4.1  | 7.1  | 9.16  | 8.12  | 8.17   |
| 9.26     | 8.7     | 7.99    | 8.77    | 4.76 | 7.24 | 9.9   | 8.32  | 8.26   |
| 10.23    | 10.7    | 9.04    | 9.53    | 1.48 | 1.9  | 8.7   | 8.71  | 7.59   |
| 9.95     | 9.81    | 8.06    | 8.84    | 2.12 | 2.31 | 8.96  | 6.78  | 8.41   |
| 10.04    | 10.06   | 8.63    | 8.58    | 1.82 | 3.59 | 10.18 | 7.94  | 7.71   |
| 9.73     | 8.9     | 8.23    | 8.35    | 2.15 | 5.4  | 10.03 | 6.92  | 8.6    |
| 9.66     | 8.75    | 8.04    | 8.37    | 1.78 | 5.01 | 9.85  | 6.75  | 8.69   |
| 9.96     | 8.76    | 8.53    | 8.68    | 0    | 5.92 | 11    | 7.55  | 8.36   |
| 8.84     | 7.4     | 7.06    | 6.9     | 1.43 | 3.75 | 8.32  | 6.1   | 6.8    |
| 9.74     | 7.47    | 6.34    | 7.96    | 2.13 | 2.71 | 7.36  | 5.52  | 8.22   |
| 9.52     | 8.1     | 6.54    | 7.98    | 1.52 | 4.33 | 7.52  | 6.45  | 8.36   |
| 9.46     | 8.39    | 6.68    | 8.37    | 4.44 | 6.34 | 7.66  | 7.88  | 8.35   |
| 8.63     | 10.16   | 6.96    | 8.15    | 5.45 | 6.38 | 7.47  | 7.7   | 7.78   |
| 9.17     | 9.16    | 7.08    | 8.85    | 5.73 | 6.76 | 8.78  | 8.13  | 7.73   |
| 8.87     | 10.07   | 6.62    | 8.6     | 5.1  | 6.67 | 8.51  | 7.53  | 7.94   |
| 8.95     | 9.77    | 7.2     | 8.92    | 5.88 | 7.18 | 8.48  | 7.92  | 7.85   |
| 8.92     | 9.15    | 7.9     | 8.03    | 5.37 | 6.56 | 7.89  | 8.01  | 6.65   |
| 9.9      | 7.66    | 8.49    | 8.17    | 2.06 | 6.57 | 10.16 | 5.76  | 7.3    |
| 9.73     | 7.5     | 7.96    | 8.07    | 0.61 | 3.42 | 8.97  | 5.07  | 8.08   |
| 9.84     | 8.01    | 8.61    | 8.51    | 0.47 | 5.79 | 10.12 | 7.45  | 7.57   |
| 9.27     | 10.63   | 7.66    | 7.79    | 2.77 | 2.45 | 6.89  | 6.12  | 6.55   |
| 9.41     | 10.49   | 6.81    | 7.3     | 0.4  | 2.57 | 7.05  | 5.88  | 7.15   |
| 9.31     | 10.76   | 7.46    | 7.54    | 0.37 | 2.69 | 7.61  | 6.5   | 6.92   |
| 9.18     | 10.78   | 7.47    | 7.5     | 0.74 | 3.07 | 8.29  | 6.61  | 6.72   |
| 8.13     | 8.2     | 6.28    | 7.64    | 4.8  | 6.45 | 7.85  | 7.17  | 7.02   |
| 7.97     | 7.82    | 5.76    | 7.43    | 4.7  | 6.77 | 8.01  | 6.7   | 7.32   |
| 7.68     | 7.61    | 5.35    | 7.31    | 4.92 | 6.47 | 7.41  | 7.24  | 6.89   |
| 8.25     | 7.88    | 6.06    | 7.22    | 4.06 | 5.43 | 7.42  | 5.98  | 7.06   |
| 9.87     | 8.77    | 8.18    | 9.38    | 2.86 | 2.86 | 8.38  | 10.05 | 6.45   |
| 8.98     | 8.96    | 7.25    | 6.87    | 0.31 | 4.12 | 8.45  | 7.4   | 8.06   |
| 9.42     | 8.64    | 7.28    | 6.44    | 2.32 | 4    | 8.57  | 7.83  | 7.79   |
| 9.27     | 8.32    | 7.81    | 6.18    | 1.39 | 4.98 | 9.65  | 7.17  | 7.44   |
| 10.35    | 10.35   | 8.26    | 8.65    | 2.63 | 3.22 | 9.11  | 7.32  | 7.45   |
| 10.18    | 10.82   | 7.7     | 7.76    | 0.01 | 3.82 | 8.8   | 5.68  | 7.62   |
| 10.25    | 10.86   | 7.32    | 7.85    | 0.5  | 4.08 | 8.15  | 6.17  | 8.01   |

<https://mc.manuscriptcentral.com/gut>

|    |       |       |      |       |      |      |       |       |       |
|----|-------|-------|------|-------|------|------|-------|-------|-------|
| 1  |       |       |      |       |      |      |       |       |       |
| 2  | 10.23 | 10.74 | 8.09 | 8.06  | 1.08 | 4.94 | 9.49  | 6.87  | 7.65  |
| 3  | 9.58  | 9.06  | 6.44 | 7.85  | 4.62 | 6.46 | 8.31  | 8.14  | 7.83  |
| 4  | 9.3   | 8.81  | 6.55 | 7.86  | 4.51 | 6.26 | 8.14  | 7.64  | 7.77  |
| 5  | 9.39  | 8.8   | 6.26 | 7.6   | 4.28 | 6.31 | 8.23  | 7.27  | 7.8   |
| 6  | 9.34  | 8.7   | 6.81 | 7.85  | 4.72 | 6.57 | 9.37  | 7.9   | 7.68  |
| 7  | 9.81  | 8.86  | 7.98 | 8.29  | 3.04 | 4.55 | 8.04  | 6.96  | 8.09  |
| 8  | 9.85  | 9.01  | 8.04 | 8.59  | 2.25 | 3.57 | 8.87  | 6.89  | 8.31  |
| 9  | 9.63  | 8.88  | 7.53 | 8.21  | 0.59 | 2.32 | 7.09  | 4.91  | 8.81  |
| 10 | 9.96  | 8.67  | 8.52 | 7.88  | 2.76 | 4.25 | 10.22 | 7.18  | 8.75  |
| 11 | 9.14  | 8.85  | 7.38 | 8.6   | 0    | 3.17 | 7.9   | 6.79  | 8.34  |
| 12 | 9.29  | 8.55  | 7.05 | 8.42  | 1.54 | 3.35 | 7.73  | 6.95  | 8.26  |
| 13 | 9.26  | 8.2   | 6.75 | 8.38  | 1.82 | 3.82 | 7.24  | 6.14  | 8.22  |
| 14 | 9.2   | 8.05  | 7.35 | 8.17  | 1.98 | 3.79 | 9.24  | 7.15  | 8.15  |
| 15 | 10.4  | 9.67  | 6.74 | 14.48 | 5.15 | 7.74 | 6.15  | 10.64 | 10.54 |
| 16 | 10.08 | 11.23 | 8.16 | 10.74 | 3.79 | 8.76 | 8.62  | 8.3   | 8.95  |
| 17 | 9.51  | 10.44 | 7.35 | 9.32  | 4.56 | 7.95 | 8.45  | 7.79  | 8.6   |
| 18 | 9.48  | 9.56  | 1.83 | 10.58 | 6.39 | 9.81 | 9.2   | 9.8   | 10.06 |
| 19 | 9.34  | 9.18  | 3.58 | 10.99 | 6.75 | 9.53 | 8.8   | 10    | 9.82  |
| 20 | 9.53  | 8.05  | 5.09 | 8.46  | 4.46 | 5.84 | 7.07  | 6.89  | 8.15  |
| 21 | 9.75  | 7.96  | 4.35 | 8.3   | 3.78 | 5.83 | 6.93  | 6.59  | 8.14  |
| 22 | 9.47  | 8.56  | 5.99 | 8.55  | 5.1  | 6.36 | 7.47  | 7.35  | 7.91  |
| 23 | 9.6   | 9.3   | 7.65 | 6.61  | 1.42 | 3.42 | 9.25  | 7.99  | 7.63  |
| 24 | 9.32  | 9.05  | 7.29 | 7.28  | 3.09 | 5.53 | 9.41  | 8.43  | 7.7   |
| 25 | 8.93  | 9.18  | 7.22 | 7.54  | 4.63 | 7.09 | 9.79  | 8.45  | 7.84  |
| 26 | 10.41 | 9.21  | 8.27 | 8.95  | 3.22 | 4.1  | 8.72  | 7.38  | 9.04  |
| 27 | 10.57 | 9.38  | 8.45 | 8.67  | 2.85 | 4.21 | 8.93  | 6.61  | 9.14  |
| 28 | 10.64 | 9.23  | 8.93 | 8.81  | 2.28 | 1.69 | 9.56  | 6.55  | 8.9   |
| 29 | 8.7   | 8.35  | 6.17 | 7.94  | 5.75 | 6.29 | 7.95  | 7.46  | 8.28  |
| 30 | 8.58  | 8.55  | 6.32 | 7.5   | 5.23 | 6.21 | 8.38  | 7.26  | 8.3   |
| 31 | 8.52  | 8.59  | 6.72 | 7.65  | 5.44 | 6.53 | 8.59  | 7.61  | 8.22  |
| 32 | 9.47  | 8.94  | 7.45 | 8.38  | 5.25 | 7.12 | 9     | 8.6   | 8.31  |
| 33 | 9.29  | 8.92  | 7.07 | 8.4   | 5.52 | 7.04 | 8.5   | 7.18  | 8.56  |
| 34 | 9.35  | 9.21  | 7.24 | 8.91  | 5.66 | 7.31 | 8.21  | 7.76  | 8.82  |
| 35 | 9.55  | 8.95  | 7.42 | 7.76  | 5.16 | 6.72 | 9.11  | 7.87  | 7.98  |
| 36 | 9.68  | 9.04  | 7.03 | 7.59  | 4.83 | 6.49 | 8.54  | 7.84  | 8.34  |
| 37 | 9.75  | 8.67  | 7.5  | 7.96  | 5.8  | 7.16 | 9.02  | 8.59  | 7.93  |
| 38 | 8.65  | 8.93  | 7.19 | 8.22  | 5.65 | 7.4  | 8.78  | 7.81  | 7.84  |
| 39 | 8.65  | 8.93  | 7.19 | 8.22  | 5.65 | 7.4  | 8.78  | 7.81  | 7.84  |
| 40 | 8.95  | 8.96  | 7.57 | 8.15  | 5.01 | 7.45 | 9.78  | 7.91  | 8.53  |
| 41 | 9.2   | 8.76  | 7.56 | 8.31  | 5.79 | 7.47 | 10.32 | 8.46  | 8.34  |
| 42 | 8.91  | 9.05  | 7.62 | 7.94  | 5.44 | 7.55 | 9.72  | 7.65  | 8.29  |
| 43 | 8.24  | 8.7   | 6.7  | 7.87  | 5.95 | 7.57 | 8.16  | 7.73  | 7.52  |
| 44 | 8.92  | 8.68  | 7.17 | 8.17  | 4.88 | 7.25 | 8.95  | 7.66  | 8.09  |
| 45 | 8.9   | 9.1   | 6.96 | 8.31  | 4.34 | 6.83 | 8.47  | 7.53  | 8.15  |
| 46 | 8.84  | 8.66  | 7.66 | 8.49  | 5.86 | 7.71 | 9.85  | 8.52  | 8.03  |
| 47 | 9.31  | 9.56  | 7.8  | 8.33  | 2.05 | 4.73 | 8.68  | 6.48  | 8.66  |
| 48 | 9.48  | 9.09  | 6.97 | 7.78  | 0.08 | 3.78 | 7.62  | 6.08  | 8.49  |
| 49 | 9.82  | 9.93  | 8.53 | 9.59  | 2.52 | 3.52 | 8.85  | 7.46  | 8.23  |
| 50 | 8.67  | 8.74  | 6.46 | 7.77  | 6.68 | 7.23 | 8.12  | 7.91  | 7.7   |
| 51 | 9.18  | 8.29  | 7.87 | 8.39  | 6.16 | 7.51 | 10.09 | 8.6   | 7.42  |
| 52 | 9.13  | 8.17  | 7.98 | 8.02  | 6.54 | 7.99 | 10.29 | 7.8   | 7.66  |
| 53 | 8.6   | 9.58  | 6.84 | 7.2   | 5.79 | 7.15 | 8.31  | 6.89  | 7.45  |

## Gut

1  
2  
3  
4  
5  
6  
7  
8  
9  
10  
11  
12  
13  
14  
15  
16  
17  
18  
19  
20  
21  
22  
23  
24  
25  
26  
27  
28  
29  
30  
31  
32  
33  
34  
35  
36  
37  
38  
39  
40  
41  
42  
43  
44  
45  
46  
47  
48  
49  
50  
51  
52  
53  
54  
55  
56  
57  
58  
59  
60

|       |       |      |       |      |      |       |       |      |
|-------|-------|------|-------|------|------|-------|-------|------|
| 9.02  | 9.69  | 6.83 | 7.23  | 5.67 | 6.89 | 8.73  | 6.68  | 7.62 |
| 8.76  | 9.61  | 7.29 | 8.29  | 6.84 | 8.29 | 9.17  | 7.98  | 8.02 |
| 9.55  | 8.69  | 8.29 | 8.19  | 5.2  | 5.59 | 9.09  | 8.24  | 7.77 |
| 9.95  | 9.59  | 8.12 | 8.58  | 2.88 | 4.08 | 9.74  | 8.67  | 7.93 |
| 10.01 | 9.22  | 8.78 | 8.97  | 3.08 | 4.19 | 10.61 | 9.52  | 7.65 |
| 9.93  | 10.87 | 8.4  | 9.58  | 0.41 | 1.99 | 9.08  | 8.08  | 6.88 |
| 9.21  | 8.42  | 7.55 | 8.6   | 0.55 | 2.36 | 8.55  | 5.16  | 8.65 |
| 9.74  | 8.54  | 7.35 | 8.09  | 0.76 | 2.93 | 9     | 6.06  | 8.58 |
| 10.78 | 10.53 | 10.2 | 12.23 | 2.49 | 2.49 | 10.69 | 10.69 | 7.25 |
| 10.52 | 9.72  | 8.21 | 9.3   | 0.79 | 3.79 | 8.78  | 7.59  | 7.85 |
| 9.9   | 9.92  | 7.28 | 7.43  | 1.49 | 1.49 | 8.26  | 5.3   | 8.06 |
| 9.28  | 9.39  | 6.18 | 7.37  | 5.48 | 6.52 | 7.68  | 6.48  | 8.15 |
| 10.62 | 10.82 | 9.76 | 11.38 | 2.26 | 3.26 | 9.49  | 8.67  | 7.12 |
| 9.03  | 9.69  | 1.2  | 8.77  | 5.74 | 8.94 | 9.21  | 8.48  | 8.69 |
| 9.12  | 8.13  | 5.62 | 6.89  | 1.53 | 3.65 | 8.05  | 5.7   | 7.95 |
| 9.2   | 7.93  | 4.64 | 6.17  | 1.42 | 2.42 | 7.47  | 4.29  | 8.08 |
| 9.14  | 7.94  | 6.43 | 6.34  | 0.52 | 3.84 | 8.77  | 5.77  | 7.85 |
| 10.03 | 10.76 | 7.59 | 7.63  | 1.43 | 1.76 | 7.99  | 5.34  | 7.92 |
| 9.37  | 10.14 | 7.15 | 8.14  | 4.77 | 6.3  | 8.29  | 6.76  | 7.34 |
| 9.5   | 10.53 | 7.67 | 8.59  | 4.25 | 5.68 | 8.6   | 6.58  | 7.32 |
| 9.49  | 10.59 | 9.75 | 15.26 | 5.16 | 7.16 | 7.16  | 12.03 | 7.49 |
| 9.74  | 8.13  | 7.02 | 7.89  | 0    | 2.94 | 7.1   | 3.94  | 8.42 |
| 9.63  | 9.07  | 7.51 | 8.52  | 0.54 | 3.54 | 8.19  | 6.91  | 7.89 |
| 9.55  | 11.2  | 8.63 | 8.93  | 1.18 | 3.77 | 9.79  | 7.16  | 7.11 |
| 9.98  | 11.08 | 9.32 | 10.02 | 0.91 | 3.91 | 10.08 | 8.5   | 6.99 |
| 9.59  | 9.98  | 8.72 | 8.48  | 3.35 | 3.54 | 9.85  | 7.1   | 6.65 |
| 8.23  | 8.81  | 4.9  | 8.92  | 7.28 | 8.06 | 7.88  | 8.95  | 7.96 |
| 7.96  | 8.67  | 0.86 | 8.89  | 7.35 | 8.3  | 8.01  | 8.9   | 8.2  |
| 7.35  | 8.5   | 1.77 | 8.34  | 7.52 | 7.92 | 8.16  | 7.83  | 8.19 |
| 8.67  | 9.24  | 7.04 | 6.9   | 2.82 | 2.59 | 8.71  | 7.16  | 7.19 |
| 9.09  | 8.49  | 8.07 | 6.98  | 0    | 4.72 | 10.24 | 7.34  | 6.53 |
| 8.93  | 8.95  | 7.76 | 8.15  | 0.11 | 4.75 | 9.77  | 7.37  | 7.66 |
| 9.17  | 8.16  | 7.62 | 6.33  | 1.16 | 2.16 | 9.74  | 8.01  | 6.5  |
| 7.7   | 7.73  | 4.7  | 8.93  | 5.81 | 7.38 | 7.04  | 8.28  | 7.5  |
| 7.52  | 8.33  | 3.06 | 7.64  | 5.46 | 7.01 | 7.07  | 7.16  | 7.3  |
| 7.7   | 8.51  | 4.43 | 7.93  | 5.45 | 6.61 | 6.9   | 7.26  | 6.93 |
| 7.92  | 8.46  | 0    | 8.52  | 5.94 | 8.44 | 7.65  | 7.96  | 8.52 |
| 6.89  | 7.86  | 3.66 | 7.95  | 5.42 | 7.44 | 7.06  | 7.69  | 7.22 |
| 6.93  | 7.81  | 3.42 | 8.09  | 5.85 | 7.38 | 7.25  | 7.76  | 7.12 |
| 6.89  | 7.81  | 3.77 | 7.89  | 5.8  | 7.25 | 7.31  | 7.74  | 7.15 |
| 8.41  | 6.93  | 2.41 | 9.38  | 3.41 | 9.64 | 7.58  | 7.58  | 9.19 |
| 8.19  | 8.71  | 3.64 | 9     | 6.18 | 8.46 | 8.17  | 8.5   | 7.9  |
| 8.34  | 9     | 0.33 | 9.09  | 6.39 | 8.35 | 8.42  | 8.81  | 8.47 |
| 8.62  | 8.98  | 5.33 | 9.54  | 4.77 | 7.15 | 7.36  | 7.74  | 7.76 |
| 8.12  | 8.63  | 3.21 | 8.98  | 5.7  | 8    | 7.84  | 8.32  | 8.05 |
| 8.54  | 9.01  | 6.49 | 8.34  | 5.45 | 7.56 | 8.17  | 8.3   | 7.46 |
| 8.27  | 9.23  | 4.46 | 8.48  | 6.13 | 8.53 | 8.37  | 8.94  | 7.87 |
| 7.77  | 8.69  | 0.71 | 7.6   | 6.46 | 8.62 | 8.12  | 8.25  | 7.78 |
| 8.31  | 8.75  | 3.6  | 8.78  | 6.32 | 8.97 | 8.49  | 8.93  | 8.75 |
| 8.57  | 8.56  | 6    | 6.37  | 5.3  | 6.58 | 8.06  | 6.67  | 7.65 |
| 8.61  | 8.53  | 6.01 | 6.68  | 4.65 | 6.82 | 7.65  | 5.17  | 7.78 |
| 8.64  | 8.86  | 6.04 | 7.31  | 5.32 | 6.96 | 7.88  | 6.83  | 7.54 |

<https://mc.manuscriptcentral.com/gut>

|    |       |       |       |       |      |      |       |       |      |
|----|-------|-------|-------|-------|------|------|-------|-------|------|
| 1  |       |       |       |       |      |      |       |       |      |
| 2  | 8.45  | 8.79  | 6.42  | 7.06  | 5.66 | 6.87 | 7.85  | 6.98  | 7.68 |
| 3  | 9.73  | 9.74  | 7.47  | 8.67  | 4.69 | 6.37 | 8.52  | 7.5   | 8.51 |
| 4  | 9.85  | 9.49  | 7.42  | 8.69  | 4.7  | 6.67 | 8.62  | 8.09  | 8.69 |
| 5  | 9.39  | 9.87  | 6.52  | 8.46  | 4.74 | 7.13 | 8.3   | 7.4   | 8.72 |
| 6  | 9.59  | 9.74  | 6.65  | 8.34  | 4.73 | 6.8  | 8.1   | 7.13  | 8.76 |
| 7  | 9.3   | 8.76  | 7.74  | 8.94  | 5.6  | 7.08 | 9.21  | 8.08  | 7.66 |
| 8  | 10.05 | 10.17 | 8.6   | 9.72  | 0.84 | 4.54 | 9.39  | 9.15  | 7.33 |
| 9  | 9.76  | 9.85  | 7.74  | 8.6   | 0.98 | 3.98 | 8.9   | 8.14  | 7.52 |
| 10 | 10.31 | 10.53 | 9.69  | 9.74  | 2.33 | 4.99 | 11.41 | 10.51 | 6.57 |
| 11 | 10.17 | 9.22  | 8.42  | 9.55  | 3.93 | 5.29 | 9.56  | 7.71  | 8.8  |
| 12 | 9.73  | 9.29  | 8.43  | 9.13  | 4.56 | 5.78 | 10.15 | 8.09  | 8.4  |
| 13 | 9.77  | 9.49  | 8.56  | 9.32  | 3.97 | 5.78 | 10.03 | 7.67  | 8.41 |
| 14 | 9.81  | 9.14  | 8.33  | 9.02  | 3.65 | 6.25 | 10.34 | 8.09  | 8.52 |
| 15 | 9.12  | 9.56  | 7.53  | 9.31  | 4.65 | 5.9  | 8.76  | 7.78  | 7.32 |
| 16 | 9.7   | 10.1  | 8.04  | 9.87  | 1.51 | 3.32 | 9.14  | 6.64  | 7.53 |
| 17 | 9.63  | 9.34  | 9.05  | 9.89  | 5.1  | 6.3  | 11.03 | 9.04  | 7.06 |
| 18 | 9.45  | 9.66  | 8.33  | 7.79  | 2    | 2.58 | 8.85  | 7.82  | 7.21 |
| 19 | 9.64  | 9.08  | 7.55  | 7.79  | 2.25 | 4.13 | 8.98  | 7.76  | 8.69 |
| 20 | 9.98  | 9.7   | 8.58  | 8     | 0.52 | 5.38 | 10.77 | 7.91  | 7.84 |
| 21 | 9.09  | 8.64  | 7.51  | 7.66  | 3.39 | 1.93 | 8.2   | 8.02  | 7.42 |
| 22 | 9.48  | 8.09  | 6.8   | 7.33  | 3    | 2.13 | 8.52  | 4.19  | 8.57 |
| 23 | 9.18  | 8.56  | 5.89  | 7.16  | 2.65 | 0.48 | 7.49  | 4.39  | 8.77 |
| 24 | 9.68  | 8.88  | 7.82  | 8.32  | 4.57 | 6.19 | 9.3   | 8.23  | 7.46 |
| 25 | 9.77  | 9.05  | 7.44  | 8.37  | 4.39 | 5.32 | 9.11  | 7.54  | 7.56 |
| 26 | 11.08 | 9.7   | 10.39 | 11.31 | 3.15 | 6.61 | 11.99 | 11.3  | 6.85 |
| 27 | 8.12  | 7.91  | 6.93  | 6.57  | 0.36 | 0.36 | 6.93  | 5.95  | 6.24 |
| 28 | 8.09  | 7.71  | 6.79  | 6.88  | 0.79 | 5.25 | 8.36  | 6.98  | 7.17 |
| 29 | 7.92  | 7.65  | 6.53  | 6.36  | 2.93 | 4.01 | 6.94  | 5.32  | 7.16 |
| 30 | 7.97  | 7.33  | 7.6   | 6.76  | 1.9  | 1.9  | 10.45 | 8.26  | 7.26 |
| 31 | 6.66  | 7.73  | 1.76  | 7.95  | 6.01 | 7.57 | 6.93  | 7.8   | 7.43 |
| 32 | 7.15  | 7.91  | 3.04  | 7.59  | 6.18 | 7.08 | 7.06  | 7.74  | 6.95 |
| 33 | 6.53  | 7.87  | 0.88  | 7.57  | 6.47 | 7.42 | 6.95  | 7.72  | 7.05 |
| 34 | 6.76  | 7.48  | 1.96  | 7.91  | 6.54 | 7.31 | 6.84  | 7.54  | 7.04 |
| 35 | 7.99  | 8.22  | 5.93  | 7.15  | 3.61 | 5.65 | 7.18  | 6.36  | 7.36 |
| 36 | 8.05  | 8.21  | 5.93  | 7.56  | 4.87 | 6.14 | 7.7   | 7.17  | 7.27 |
| 37 | 7.89  | 7.86  | 6.32  | 7.31  | 4.72 | 6.26 | 8.2   | 7.27  | 7.06 |
| 38 | 8.36  | 7.72  | 6.68  | 7.4   | 4.69 | 6.12 | 8.53  | 6.96  | 6.63 |
| 39 | 8.52  | 8.52  | 8.39  | 7.72  | 1.35 | 1.94 | 7.22  | 6.62  | 5.88 |
| 40 | 10.24 | 8.97  | 7.75  | 8.59  | 1.46 | 5.37 | 8.56  | 7.75  | 7.53 |
| 41 | 9.7   | 10.27 | 7.65  | 9.07  | 2    | 3    | 7.78  | 6.57  | 7.97 |
| 42 | 10.35 | 11.05 | 9.64  | 10.97 | 2.23 | 3.23 | 8.99  | 10.53 | 7.04 |
| 43 | 9.24  | 8.76  | 6.94  | 7.83  | 2.5  | 6.04 | 8.17  | 7.68  | 8.04 |
| 44 | 9.6   | 10.51 | 9.55  | 11.77 | 4.51 | 6.83 | 9.97  | 10.37 | 6.1  |
| 45 | 9.32  | 8.28  | 7.85  | 7.95  | 2.19 | 2.45 | 8.84  | 6.98  | 7.6  |
| 46 | 9.58  | 8.22  | 8.36  | 8.33  | 1.94 | 3.39 | 9.73  | 6.72  | 7.34 |
| 47 | 8.95  | 6.56  | 7.64  | 7.24  | 0.68 | 1.68 | 8.61  | 5.54  | 6.77 |
| 48 | 9.43  | 8.18  | 7.86  | 8.27  | 3.57 | 5.77 | 9.54  | 7.68  | 6.43 |
| 49 | 9.22  | 7.1   | 7.86  | 7.32  | 2.6  | 3.08 | 9.43  | 7.53  | 6.67 |
| 50 | 9.06  | 8.06  | 7.48  | 8.02  | 4.34 | 5.87 | 9.43  | 7.84  | 6.83 |
| 51 | 8.62  | 8.2   | 7.05  | 6.46  | 1.16 | 1.57 | 7.8   | 6.05  | 6.37 |
| 52 | 8.13  | 8.69  | 6.83  | 6.68  | 3.34 | 5.28 | 8.68  | 7.2   | 7    |
| 53 | 8.25  | 8.67  | 6.65  | 7.06  | 3.54 | 5.92 | 8.22  | 7.27  | 6.96 |

<https://mc.manuscriptcentral.com/gut>

|       |      |      |       |      |      |       |      |      |
|-------|------|------|-------|------|------|-------|------|------|
| 9.05  | 9.53 | 8.43 | 7     | 1.79 | 4.37 | 10.53 | 8.17 | 6.11 |
| 8.83  | 7.23 | 7.01 | 7.12  | 3.1  | 5.35 | 8.4   | 9.3  | 5.91 |
| 8.29  | 6.42 | 5.59 | 6.83  | 2.91 | 4.67 | 7.48  | 6.52 | 6.17 |
| 8.51  | 6.57 | 5.85 | 6.49  | 3.07 | 4.39 | 7.15  | 5.85 | 6.42 |
| 8.14  | 8.21 | 6.91 | 9.23  | 5.64 | 7.14 | 8.05  | 8.78 | 7.25 |
| 9.05  | 8.27 | 6.54 | 7.21  | 1.57 | 2.37 | 7.54  | 6.01 | 6.96 |
| 8.73  | 9.15 | 5.8  | 7.58  | 0.07 | 3.15 | 6.19  | 4.42 | 7.39 |
| 8.66  | 9.21 | 5.76 | 7.87  | 1.67 | 3.05 | 6.36  | 4.44 | 7.31 |
| 7.23  | 8.02 | 0.27 | 8.4   | 6    | 7.6  | 7.79  | 8    | 7.54 |
| 8.01  | 8.25 | 6.62 | 8.1   | 5.21 | 7    | 8.11  | 7.56 | 7.19 |
| 9.2   | 9.05 | 7.92 | 8.24  | 1.97 | 3.11 | 8.31  | 7.61 | 7.86 |
| 8.94  | 8.64 | 7.49 | 8.08  | 3.47 | 7.06 | 9.57  | 7.53 | 8.04 |
| 9.37  | 8.87 | 8.3  | 8.66  | 2.3  | 6.61 | 9.75  | 8.32 | 7.69 |
| 9.3   | 8.24 | 8.06 | 8.11  | 3.3  | 5.83 | 9.6   | 8.16 | 7.33 |
| 11.95 | 9.89 | 9.31 | 12.08 | 2.54 | 4.13 | 8.1   | 9.98 | 6    |
| 8.8   | 8    | 7.54 | 8.27  | 2.61 | 5.61 | 8.14  | 6.35 | 6.97 |
| 8.57  | 7.65 | 6.55 | 7.6   | 4.56 | 6.23 | 8     | 7.18 | 7.45 |
| 9.17  | 7.83 | 7.52 | 8.43  | 1.75 | 5.51 | 8.23  | 6.6  | 6.45 |

1  
2  
3  
4  
5  
6  
7  
8  
9  
10  
11  
12  
13  
14  
15  
16  
17  
18  
19  
20  
21  
22  
23  
24  
25  
26  
27  
28  
29  
30  
31  
32  
33  
34  
35  
36  
37  
38  
39  
40  
41  
42  
43  
44  
45  
46  
47  
48  
49  
50  
51  
52  
53  
54  
55  
56  
57  
58  
59  
60

| TP53  | TPM2  | TPSB2 | TPSD1 | TSHR | TSPAN1 | TWIST1 | TWIST2 | TXNIP |
|-------|-------|-------|-------|------|--------|--------|--------|-------|
| 7.39  | 9.08  | 9.08  | 7.23  | 0    | 6.59   | 5.56   | 6.15   | 12.11 |
| 7.84  | 10.57 | 9.75  | 6.51  | 2.16 | 10     | 6.05   | 5.84   | 11.89 |
| 7.83  | 10.27 | 9.89  | 6.65  | 0.08 | 9.87   | 5.92   | 6.23   | 11.99 |
| 8.21  | 13.01 | 10.55 | 4.09  | 1.76 | 9.24   | 7.21   | 6.16   | 13.3  |
| 8.22  | 10.29 | 9.07  | 8.77  | 1.01 | 2.01   | 7.16   | 7.29   | 9.39  |
| 7.95  | 10.75 | 9.47  | 6.65  | 2.08 | 7.46   | 6.46   | 6.03   | 10.95 |
| 7.8   | 10.33 | 9.68  | 6.56  | 1.5  | 8.47   | 6.33   | 5.62   | 10.87 |
| 8.44  | 12.99 | 10.01 | 3.2   | 1.39 | 8.03   | 7.93   | 5.56   | 12.73 |
| 8.34  | 11.75 | 8.63  | 3.54  | 2.37 | 6.52   | 4.89   | 3.83   | 12.43 |
| 7.77  | 11.04 | 7.94  | 6.1   | 0    | 9.51   | 5.49   | 5.82   | 11.26 |
| 8.29  | 11.56 | 9.78  | 4.19  | 0.38 | 9.82   | 5.13   | 4.9    | 11.46 |
| 8.17  | 12.58 | 9.61  | 4.27  | 0.68 | 9.91   | 6.61   | 6.21   | 12    |
| 9.8   | 9.77  | 9.58  | 6.75  | 0.77 | 7.86   | 5.23   | 5.68   | 10.59 |
| 9.21  | 10.49 | 8     | 6.69  | 2.26 | 7.17   | 6.44   | 6.3    | 10.6  |
| 9     | 13.67 | 7.6   | 3.77  | 3.35 | 3.35   | 7.32   | 6.23   | 14.05 |
| 7.28  | 11.25 | 8.95  | 7.39  | 0.94 | 6.8    | 7.03   | 6.59   | 12.27 |
| 7.27  | 11.97 | 10.35 | 7.87  | 1.29 | 7.81   | 6.84   | 6.72   | 12.17 |
| 7.14  | 13.09 | 9.33  | 7.76  | 1.76 | 7.19   | 8.03   | 6.54   | 12.47 |
| 9.08  | 11.48 | 8.78  | 4.07  | 2.7  | 3.8    | 7.45   | 5.15   | 13.25 |
| 9.36  | 11.28 | 11.02 | 4.01  | 2.89 | 8.36   | 5.42   | 4.59   | 11.74 |
| 9.28  | 12.89 | 9.73  | 4.31  | 2.82 | 3.67   | 5.93   | 5.02   | 12.35 |
| 8.96  | 13.37 | 8.79  | 4.06  | 0.15 | 9.26   | 6.34   | 5.54   | 12.61 |
| 9.09  | 12.55 | 9.17  | 4.2   | 1.78 | 9.09   | 5.24   | 5.41   | 12.65 |
| 8.75  | 14.04 | 9.95  | 3.22  | 1.48 | 9.18   | 5.18   | 5.73   | 12.78 |
| 7.25  | 11.46 | 6.56  | 2.75  | 2.01 | 2.75   | 3.01   | 4.75   | 11.77 |
| 6.38  | 10.8  | 9.17  | 1.13  | 1.13 | 10.08  | 0.13   | 2.94   | 11.74 |
| 6.35  | 10.78 | 8.46  | 3.11  | 1.52 | 9.86   | 3.11   | 3.52   | 11.81 |
| 6.87  | 10.36 | 8.97  | 6.52  | 1.5  | 9.73   | 5.47   | 5.41   | 11.99 |
| 8.75  | 10.15 | 8.3   | 7.08  | 0.7  | 8.95   | 5.65   | 5.65   | 12.11 |
| 8.23  | 11.21 | 9.65  | 7.36  | 0    | 9.67   | 6.02   | 6.04   | 11.52 |
| 8.41  | 11.53 | 8.43  | 7.03  | 0.2  | 9.98   | 5.87   | 5.44   | 11.95 |
| 8.18  | 11.19 | 9.12  | 7.77  | 0.71 | 9.02   | 6.26   | 6.1    | 12.06 |
| 8.4   | 8.34  | 10.1  | 7.38  | 1.35 | 1.67   | 6.24   | 6.4    | 12.67 |
| 9.9   | 13.02 | 9.95  | 3.87  | 0.06 | 4.97   | 5.31   | 6.19   | 11.86 |
| 10.05 | 12.62 | 10.21 | 4     | 1.93 | 8.32   | 5.44   | 5.42   | 11.42 |
| 9.83  | 13.35 | 9.53  | 3.64  | 3.06 | 7.28   | 5.79   | 6.25   | 12.21 |
| 8.15  | 10.13 | 8.21  | 2.03  | 1.45 | 6.2    | 4.84   | 3.9    | 13.13 |
| 8.06  | 9.9   | 7.79  | 3.1   | 2.73 | 9.13   | 5.49   | 5.31   | 11.85 |
| 8.16  | 10.16 | 7.87  | 4.37  | 2.95 | 6.54   | 6.71   | 5.58   | 12.37 |
| 8.1   | 10.9  | 7.82  | 3.55  | 2.33 | 7.67   | 5.95   | 4.14   | 12.58 |
| 7.23  | 10.73 | 8.29  | 6.86  | 0    | 5.96   | 5.51   | 5.89   | 10.95 |
| 7.36  | 11.03 | 8.7   | 6.86  | 2.22 | 5.48   | 5.76   | 6.13   | 9.8   |
| 7.22  | 10.23 | 7.93  | 6.59  | 1.22 | 4.39   | 6.15   | 6.1    | 9.69  |
| 7.58  | 10.88 | 7.26  | 6.1   | 2.14 | 4.9    | 6.19   | 5.79   | 10.36 |
| 7.9   | 11.81 | 5.18  | 2.86  | 2.86 | 4.45   | 7.99   | 3.86   | 13.79 |
| 8.02  | 10.93 | 10.01 | 5.22  | 1.9  | 7.78   | 5.07   | 4.48   | 12.12 |
| 8.09  | 10.7  | 8.88  | 4.32  | 2    | 6.63   | 5.64   | 4.86   | 11.81 |
| 8     | 12.41 | 9.15  | 4.39  | 0.81 | 5.74   | 6.3    | 5.59   | 12.25 |
| 8.9   | 12.07 | 10.14 | 3.8   | 1.63 | 7.67   | 5.99   | 5.22   | 12.63 |
| 9.06  | 11.94 | 10.08 | 2.82  | 1.01 | 7.29   | 5.22   | 4.87   | 11.39 |
| 9.17  | 11.41 | 9.89  | 3.5   | 0.5  | 7.25   | 4.58   | 3.82   | 11.51 |

<https://mc.manuscriptcentral.com/gut>

1  
2  
3  
4  
5  
6  
7  
8  
9  
10  
11  
12  
13  
14  
15  
16  
17  
18  
19  
20  
21  
22  
23  
24  
25  
26  
27  
28  
29  
30  
31  
32  
33  
34  
35  
36  
37  
38  
39  
40  
41  
42  
43  
44  
45  
46  
47  
48  
49  
50  
51  
52  
53  
54  
55  
56  
57  
58  
59  
60

|       |       |       |       |      |       |      |      |       |
|-------|-------|-------|-------|------|-------|------|------|-------|
| 9.07  | 12.49 | 10.16 | 3.54  | 0.08 | 7.04  | 5.44 | 4.83 | 12.01 |
| 9.53  | 10.34 | 9.73  | 6.44  | 0.03 | 6.74  | 5.81 | 6.1  | 11.69 |
| 9.24  | 10.24 | 9.51  | 6.49  | 0.19 | 4.89  | 6.3  | 6.26 | 10.38 |
| 9.24  | 9.94  | 9.32  | 6.54  | 0    | 6.04  | 6.45 | 5.93 | 10.58 |
| 9.15  | 11.31 | 9.13  | 6.58  | 1.97 | 5.58  | 5.9  | 5.9  | 10.99 |
| 8.79  | 10.62 | 8.3   | 5.18  | 2.55 | 7.44  | 5.23 | 5.48 | 13.25 |
| 8.46  | 12.02 | 8.75  | 3.57  | 1.25 | 8.81  | 5.2  | 3.95 | 12.27 |
| 8.48  | 11.77 | 6.74  | 3.7   | 1.59 | 7.99  | 4.59 | 3.25 | 10.4  |
| 8.4   | 13.24 | 8.58  | 3.9   | 0.44 | 6.88  | 5.35 | 3.25 | 12.81 |
| 9.59  | 9.99  | 5.92  | 3.28  | 3.49 | 5.46  | 4.11 | 3.58 | 12.56 |
| 9.35  | 10.25 | 8.96  | 4.71  | 0.54 | 9.28  | 5    | 4.35 | 12.67 |
| 9.59  | 9.86  | 8.3   | 3.99  | 2.62 | 7.35  | 5.06 | 3.52 | 11.91 |
| 9.53  | 11.86 | 8.2   | 2.79  | 3.15 | 7.12  | 4.62 | 4.23 | 12.47 |
| 10.85 | 14.69 | 7.96  | 10.11 | 5.15 | 5.15  | 9.06 | 6.15 | 12.86 |
| 8.79  | 12.27 | 8.98  | 8.4   | 2.79 | 5.04  | 8.26 | 7.13 | 13.22 |
| 7.53  | 10.85 | 9.12  | 7.89  | 1.6  | 4.86  | 6.77 | 6.69 | 12.22 |
| 9.93  | 8.55  | 10.39 | 10.09 | 0.24 | 1.83  | 8.53 | 8.56 | 9.52  |
| 9.18  | 9.95  | 9.83  | 9.83  | 1.77 | 1.77  | 8.92 | 7.84 | 10.09 |
| 9.18  | 8.74  | 7.81  | 7     | 1.14 | 7.39  | 5.46 | 5.18 | 9.32  |
| 9.04  | 7.73  | 7.35  | 7.01  | 1.26 | 8.3   | 5.58 | 5.21 | 9.15  |
| 8.93  | 9.38  | 8.62  | 7.27  | 1.99 | 7.64  | 5.74 | 5.99 | 10.39 |
| 9.13  | 11.04 | 10.98 | 2.27  | 1.42 | 9.6   | 5.97 | 5.85 | 12.16 |
| 8.75  | 11.74 | 10.65 | 5.45  | 1.28 | 9.53  | 5.77 | 5.56 | 12.12 |
| 7.62  | 12.1  | 9.42  | 7.12  | 2.05 | 8.29  | 5.63 | 6.54 | 11.88 |
| 9.42  | 11.29 | 10.48 | 5.44  | 3.64 | 10.66 | 6.66 | 5.72 | 12.92 |
| 9.64  | 11.88 | 10.1  | 5.36  | 2.85 | 10.46 | 7.51 | 6.06 | 12.36 |
| 9.72  | 12.41 | 9.59  | 4.28  | 0.69 | 9.66  | 7.48 | 6.12 | 12.7  |
| 8.39  | 10.71 | 8.99  | 6.55  | 1.94 | 8.74  | 5.68 | 6.34 | 10.9  |
| 8.49  | 11.16 | 9.27  | 6.35  | 0.98 | 8.81  | 5.62 | 5.91 | 10.64 |
| 8.38  | 11.17 | 8.66  | 6.61  | 1.74 | 8.17  | 5.74 | 6.3  | 11.14 |
| 8.8   | 10.2  | 9.57  | 6.99  | 0.12 | 8.95  | 5.76 | 6.66 | 11.05 |
| 8.83  | 10.76 | 8.91  | 6.97  | 1.2  | 9.75  | 5.62 | 6.59 | 10.8  |
| 8.66  | 10.37 | 9.01  | 7.51  | 0.99 | 9.68  | 5.72 | 6.45 | 11.07 |
| 7.53  | 11.26 | 8.91  | 7.37  | 1.73 | 9.05  | 6.05 | 6.42 | 12.37 |
| 7.48  | 10.8  | 8.98  | 7.47  | 0    | 10.03 | 6.35 | 6.39 | 11.93 |
| 7.93  | 11.65 | 8.57  | 7.48  | 2.73 | 9.62  | 7.02 | 7.03 | 12.37 |
| 7.62  | 10.22 | 9.13  | 7.59  | 0.44 | 7.73  | 6.34 | 6.59 | 12.8  |
| 7.62  | 10.22 | 9.13  | 7.59  | 0.44 | 7.73  | 6.34 | 6.59 | 12.8  |
| 7.41  | 12.14 | 10.14 | 7.44  | 0.15 | 9.03  | 6.1  | 6.34 | 13.12 |
| 7.23  | 13.01 | 10.46 | 7.62  | 1.18 | 9.02  | 5.39 | 6.79 | 12.67 |
| 7.61  | 12.07 | 9.62  | 7.78  | 2.01 | 8.81  | 6.82 | 6.45 | 13    |
| 7.52  | 8.19  | 8.23  | 7.27  | 2.14 | 3.36  | 4.73 | 6.74 | 10.72 |
| 7.3   | 10.92 | 9.91  | 6.81  | 2.3  | 5.94  | 5.66 | 6.6  | 10.09 |
| 7.55  | 10.36 | 9.34  | 6.16  | 1.53 | 8.98  | 4.76 | 6.08 | 9.83  |
| 7.61  | 12.53 | 9.79  | 7.02  | 0.61 | 7.47  | 5.26 | 6.52 | 10.92 |
| 9.15  | 11.82 | 8.76  | 2.9   | 0.73 | 8.96  | 5.43 | 4.94 | 12    |
| 9.04  | 11.29 | 7.88  | 2.08  | 2.08 | 9.62  | 5.08 | 3.54 | 11.48 |
| 8.77  | 12.74 | 8.12  | 3.1   | 1.52 | 9.16  | 7.15 | 4.91 | 12.79 |
| 7.74  | 8.76  | 8.27  | 7.04  | 1.74 | 6.48  | 5.15 | 6.55 | 11.22 |
| 7.65  | 12.23 | 9.78  | 7.36  | 1.02 | 7.44  | 6.44 | 6.98 | 11.33 |
| 7.71  | 12.67 | 9.33  | 6.96  | 0.46 | 7.53  | 5.88 | 6.5  | 11.66 |
| 6.86  | 10.67 | 8.99  | 6.7   | 2.4  | 7.94  | 4.98 | 5.82 | 11.37 |

<https://mc.manuscriptcentral.com/gut>



|    |       |       |       |      |      |       |       |      |       |
|----|-------|-------|-------|------|------|-------|-------|------|-------|
| 1  |       |       |       |      |      |       |       |      |       |
| 2  | 6.81  | 11.06 | 8.89  | 6.28 | 1.47 | 8.68  | 5.82  | 5.72 | 11.14 |
| 3  | 7.6   | 12.83 | 8.43  | 7.4  | 2.1  | 6.36  | 7.55  | 6.53 | 11.66 |
| 4  | 8.8   | 10.41 | 8.8   | 6.66 | 1.83 | 7.25  | 5.46  | 6.18 | 13.28 |
| 5  | 8.64  | 12.31 | 11.35 | 6.27 | 2.4  | 10.44 | 7.93  | 7.61 | 12.4  |
| 6  | 8.67  | 13.31 | 10.94 | 6.01 | 2.08 | 10.38 | 8.08  | 6.81 | 13.02 |
| 7  | 8.13  | 11.7  | 9.01  | 4.41 | 3.87 | 7.98  | 6.54  | 4.73 | 12.94 |
| 8  | 9.07  | 10.93 | 8.48  | 2.36 | 2.87 | 10.34 | 5.13  | 4.68 | 10.75 |
| 9  | 8.87  | 11.41 | 9.47  | 4.8  | 2.08 | 10.09 | 4.84  | 5.25 | 10.77 |
| 10 | 9.17  | 15.67 | 9.38  | 5.08 | 3.49 | 8.87  | 7.74  | 5.82 | 13.76 |
| 11 | 8.48  | 11.7  | 7.97  | 3.11 | 0.79 | 7.13  | 5.96  | 3.79 | 13.09 |
| 12 | 9.09  | 11.46 | 8.23  | 2.81 | 0.49 | 7.98  | 5.7   | 4.19 | 12.06 |
| 13 | 8.36  | 9.57  | 8.03  | 6.85 | 1.48 | 7.99  | 4.75  | 5.67 | 10.76 |
| 14 | 8.89  | 15.11 | 7.75  | 4.26 | 3.26 | 6.65  | 9.56  | 5.07 | 13.86 |
| 15 | 7.13  | 7.88  | 9.06  | 9.07 | 0    | 0.79  | 7.05  | 8.39 | 8.74  |
| 16 | 8.81  | 11.49 | 6.59  | 4.7  | 0.95 | 8.77  | 5.65  | 4.95 | 9.92  |
| 17 | 8.84  | 11.28 | 6.94  | 2.16 | 0    | 9.23  | 5.16  | 3.54 | 9.62  |
| 18 | 8.55  | 11.77 | 7.36  | 3.43 | 1.1  | 9.07  | 4.47  | 4.65 | 10.42 |
| 19 | 8.31  | 10.67 | 9.68  | 3.96 | 2.6  | 9.4   | 6.54  | 4.43 | 12.48 |
| 20 | 7.94  | 10.75 | 7.49  | 6.52 | 0    | 8.31  | 6.48  | 5.84 | 11.72 |
| 21 | 8.26  | 11.06 | 7.32  | 6.07 | 0.4  | 8.78  | 6.14  | 5.37 | 12.24 |
| 22 | 7.75  | 15.9  | 6.16  | 7.49 | 5.16 | 5.16  | 11.33 | 7.49 | 14.41 |
| 23 | 6.34  | 9.29  | 7.88  | 3.59 | 1.46 | 8.22  | 5.64  | 3.94 | 9.89  |
| 24 | 7.22  | 10.3  | 8.99  | 4.93 | 2.86 | 8.74  | 5.82  | 5.34 | 11.57 |
| 25 | 6.22  | 13.15 | 9.28  | 2.77 | 1.18 | 7.61  | 6.77  | 4.77 | 12.08 |
| 26 | 6.91  | 14.06 | 9.53  | 3.23 | 3.23 | 7.1   | 7.73  | 5.15 | 12.7  |
| 27 | 7.45  | 12.62 | 9.2   | 2.13 | 0.54 | 5.75  | 7.36  | 6.07 | 12.17 |
| 28 | 6.95  | 10.04 | 8.57  | 8.3  | 1    | 3     | 7.5   | 7.74 | 10    |
| 29 | 6.76  | 5.9   | 8.59  | 8.59 | 0.86 | 0.86  | 7.18  | 7.67 | 7.89  |
| 30 | 6.98  | 7.57  | 8.09  | 7.79 | 2.77 | 2.77  | 5.23  | 7.38 | 8.29  |
| 31 | 7.59  | 9.74  | 8.1   | 0.01 | 0.01 | 7.11  | 4.76  | 4.4  | 11.44 |
| 32 | 7.41  | 13.03 | 9.33  | 2.4  | 0    | 5.61  | 6.21  | 6.28 | 11.49 |
| 33 | 7.65  | 12.99 | 8.76  | 2.11 | 0.11 | 7.63  | 6.15  | 4.43 | 11.29 |
| 34 | 7.72  | 11.97 | 8.9   | 2.48 | 0.16 | 5.55  | 6.42  | 5.77 | 11.5  |
| 35 | 6.89  | 9.34  | 8.36  | 7.62 | 0.45 | 3.45  | 5.94  | 6.36 | 9.68  |
| 36 | 6.57  | 8.67  | 7.02  | 7.07 | 0.25 | 4.42  | 4.42  | 6.06 | 8.19  |
| 37 | 6.55  | 9.08  | 7.52  | 7.2  | 0    | 5.67  | 5.7   | 6.26 | 8.77  |
| 38 | 8.04  | 6.21  | 8.76  | 8.28 | 0    | 0     | 6.52  | 7.02 | 7.44  |
| 39 | 5.98  | 7.92  | 8.08  | 6.92 | 1.34 | 1.34  | 5.34  | 6.24 | 9.22  |
| 40 | 6.59  | 9.78  | 7.68  | 7.49 | 1.1  | 2.1   | 3.9   | 6.62 | 8.07  |
| 41 | 6.14  | 10.1  | 7.72  | 7.46 | 1.31 | 3.48  | 5.26  | 6.22 | 8.65  |
| 42 | 10.66 | 13.41 | 8.87  | 9.04 | 2.41 | 3.41  | 6.22  | 7.66 | 9.26  |
| 43 | 6.84  | 7.82  | 8.68  | 8.46 | 1.06 | 2.06  | 6.41  | 7.51 | 11.04 |
| 44 | 7.49  | 5.65  | 8.9   | 8.76 | 0    | 0.33  | 5.82  | 7.74 | 7.89  |
| 45 | 7.58  | 8.97  | 7.64  | 7.81 | 0.87 | 7.94  | 7.12  | 6.62 | 10.54 |
| 46 | 7.36  | 10.03 | 8.58  | 8.25 | 1.33 | 4.7   | 6.02  | 6.93 | 9.69  |
| 47 | 7.37  | 9.91  | 8.67  | 7.52 | 0.88 | 7.13  | 6.98  | 7.03 | 11.09 |
| 48 | 6.44  | 12.02 | 8.63  | 8.45 | 0.3  | 4.54  | 7.19  | 7.63 | 9.53  |
| 49 | 6.9   | 9.28  | 8.53  | 8.15 | 1.71 | 0.71  | 4.88  | 7.32 | 8.27  |
| 50 | 8.04  | 12.31 | 9.49  | 8.69 | 0    | 0.9   | 7.96  | 7.63 | 9.47  |
| 51 | 8.6   | 10.37 | 7.41  | 5.4  | 0    | 4.96  | 3.5   | 4.67 | 11.01 |
| 52 | 8.74  | 10.78 | 7.15  | 5.3  | 0    | 5.58  | 4.39  | 4.74 | 10.07 |
| 53 | 8.84  | 10.7  | 7.91  | 6.15 | 0.04 | 5.08  | 5.71  | 5.39 | 9.89  |

<https://mc.manuscriptcentral.com/gut>

1  
2  
3  
4  
5  
6  
7  
8  
9  
10  
11  
12  
13  
14  
15  
16  
17  
18  
19  
20  
21  
22  
23  
24  
25  
26  
27  
28  
29  
30  
31  
32  
33  
34  
35  
36  
37  
38  
39  
40  
41  
42  
43  
44  
45  
46  
47  
48  
49  
50  
51  
52  
53  
54  
55  
56  
57  
58  
59  
60

|      |       |       |      |      |       |       |      |       |
|------|-------|-------|------|------|-------|-------|------|-------|
| 8.46 | 10.53 | 7.94  | 6.66 | 0.27 | 6.2   | 5.4   | 5.66 | 10.39 |
| 7.94 | 11.43 | 8.05  | 6.01 | 1.52 | 9.03  | 6.56  | 6.1  | 12.44 |
| 8    | 11.4  | 9.29  | 6.78 | 2.65 | 10.2  | 6.64  | 6.38 | 11.78 |
| 7.46 | 11.32 | 7.48  | 7.22 | 0.74 | 8.88  | 6.52  | 6.62 | 10.99 |
| 7.48 | 11.52 | 7.4   | 7.01 | 2.27 | 8.97  | 6.46  | 5.73 | 11.2  |
| 8.22 | 10.44 | 8.5   | 6.94 | 0.76 | 6.16  | 6.16  | 6.8  | 11.8  |
| 7.94 | 12.25 | 11.53 | 6.01 | 0.84 | 9.36  | 7.11  | 6.23 | 12.5  |
| 7.72 | 11.53 | 11.45 | 5.3  | 1.98 | 9.82  | 5.3   | 5.62 | 11.76 |
| 8.19 | 14.91 | 11    | 5.95 | 3.33 | 7.05  | 7.61  | 7.76 | 13.84 |
| 9.65 | 11.84 | 7.36  | 5.93 | 0.76 | 7.95  | 6.57  | 5.35 | 11.76 |
| 9.7  | 12.19 | 9.07  | 6.43 | 1.75 | 6.32  | 6.66  | 5.89 | 12.13 |
| 9.72 | 12.51 | 8.57  | 6.24 | 2.71 | 6.38  | 7.36  | 6.41 | 12.23 |
| 9.85 | 13.09 | 8.21  | 6.09 | 1.06 | 7.33  | 6.19  | 5.39 | 12.2  |
| 8.41 | 10.32 | 11.5  | 6.47 | 1.48 | 9.91  | 4.65  | 5.82 | 11.73 |
| 9.04 | 11.35 | 11.83 | 4.94 | 1.83 | 10.67 | 5.06  | 3.83 | 11.44 |
| 8.25 | 14.24 | 10.53 | 6.03 | 2.47 | 7.97  | 7.49  | 5.98 | 13.02 |
| 8.52 | 10.38 | 10.75 | 3.45 | 2.8  | 7.38  | 5.64  | 5.24 | 13.16 |
| 8.32 | 11.51 | 11    | 4.37 | 2.67 | 8.56  | 4.37  | 5.13 | 11.91 |
| 8.06 | 13.98 | 10.87 | 3.98 | 0.52 | 7.87  | 5.52  | 5.47 | 12.8  |
| 8.76 | 10.53 | 8.87  | 2.93 | 0.93 | 8.8   | 4.45  | 5.18 | 12.59 |
| 9.15 | 11.29 | 8.43  | 3.63 | 1.13 | 5.4   | 7.87  | 5.97 | 10.62 |
| 9.08 | 10.15 | 6.86  | 0.48 | 0    | 5.54  | 5.67  | 4.65 | 10.82 |
| 7.58 | 11.19 | 11.56 | 7.01 | 2.69 | 9.01  | 6.86  | 6.28 | 12.01 |
| 7.63 | 11.48 | 11.13 | 6.54 | 2.51 | 8.7   | 6.84  | 5.74 | 11    |
| 7.61 | 16.6  | 9.22  | 7.4  | 4.15 | 7.91  | 10.14 | 6.96 | 14.69 |
| 7.87 | 9.15  | 6.29  | 2.95 | 0.36 | 3.36  | 3.36  | 3.68 | 11.96 |
| 7.82 | 10.87 | 9.54  | 5.43 | 1.79 | 7.3   | 4.79  | 4.6  | 10.99 |
| 8.25 | 9.72  | 5.93  | 3.85 | 0    | 3.35  | 4.22  | 4.41 | 9.84  |
| 7.51 | 13.16 | 8.11  | 4.9  | 2.9  | 1.9   | 5.07  | 4.71 | 11.72 |
| 6.34 | 10    | 7.82  | 7.08 | 2.76 | 1.76  | 5.93  | 5.93 | 7.37  |
| 6.53 | 9.91  | 7.96  | 7    | 0.72 | 5.97  | 6.24  | 6.11 | 9.41  |
| 5.84 | 7.39  | 7.74  | 7.26 | 0.88 | 0.88  | 4.79  | 6.44 | 6.99  |
| 6.31 | 9.96  | 7.85  | 7.15 | 0.96 | 2.96  | 5.71  | 6.24 | 8.36  |
| 6.14 | 9.52  | 8.15  | 6.28 | 0.36 | 5.4   | 3.82  | 4.68 | 10.69 |
| 6.29 | 9.85  | 8.66  | 6.74 | 0    | 5.25  | 5.85  | 5.73 | 10.71 |
| 5.98 | 10.24 | 8.61  | 6.8  | 0    | 4.23  | 4.52  | 5.44 | 10.46 |
| 6.41 | 10.89 | 8.28  | 6.13 | 0    | 5.71  | 5.74  | 5.4  | 10.78 |
| 8.78 | 9.56  | 7.37  | 3.35 | 1.35 | 1.94  | 4.75  | 3.35 | 14.19 |
| 8.27 | 11.75 | 9.67  | 6.63 | 1.46 | 9.18  | 6.37  | 4.92 | 11.87 |
| 8.64 | 10.54 | 10.45 | 5    | 1.42 | 9.65  | 4.81  | 3    | 12.37 |
| 8.85 | 13.55 | 9.8   | 4.82 | 4.23 | 7.09  | 7.79  | 4.23 | 14.23 |
| 8.84 | 10.19 | 7.75  | 5.71 | 1.18 | 7.65  | 5.59  | 5.45 | 11.55 |
| 7.51 | 15.11 | 8.76  | 7.1  | 4.51 | 5.51  | 8.76  | 7.1  | 14.07 |
| 9.28 | 12.2  | 10.72 | 5.23 | 0    | 9.4   | 4.87  | 4.12 | 11.9  |
| 9.37 | 13.14 | 9.49  | 4.1  | 1.52 | 8.5   | 6.36  | 4.79 | 11.98 |
| 7.92 | 8.63  | 4     | 2.27 | 0.68 | 8.86  | 3.27  | 0.68 | 10.43 |
| 7.75 | 12.5  | 7.54  | 5.84 | 0.98 | 7.32  | 5.44  | 5.15 | 11.42 |
| 8.06 | 12    | 7.96  | 3.45 | 0.28 | 7.99  | 4.52  | 3.86 | 11.16 |
| 7.67 | 12.16 | 8.28  | 6.34 | 0.26 | 7.39  | 5.01  | 5.26 | 10.86 |
| 7.73 | 10.69 | 5.57  | 1.57 | 0    | 8.64  | 4.1   | 4.53 | 12.31 |
| 7.19 | 10.96 | 8.28  | 5.66 | 2.11 | 7.95  | 6.17  | 4.92 | 11.01 |
| 6.95 | 10.71 | 8.53  | 5.77 | 0.83 | 7.39  | 5.72  | 5.59 | 10.75 |

<https://mc.manuscriptcentral.com/gut>

1  
2  
3  
4  
5  
6  
7  
8  
9  
10  
11  
12  
13  
14  
15  
16  
17  
18  
19  
20  
21  
22  
23  
24  
25  
26  
27  
28  
29  
30  
31  
32  
33  
34  
35  
36  
37  
38  
39  
40  
41  
42  
43  
44  
45  
46  
47  
48  
49  
50  
51  
52  
53  
54  
55  
56  
57  
58  
59  
60

|      |       |      |      |      |      |      |      |       |
|------|-------|------|------|------|------|------|------|-------|
| 7.34 | 14.5  | 7.06 | 0.79 | 0.79 | 7.66 | 7.2  | 5.65 | 12.91 |
| 7.51 | 11.49 | 5.85 | 5.49 | 1.1  | 6.62 | 6.27 | 5.42 | 11.75 |
| 7.19 | 9.82  | 7.43 | 5.11 | 0.59 | 6.61 | 5.67 | 5.44 | 10.06 |
| 7.7  | 10.04 | 7.07 | 5.07 | 0.49 | 7.01 | 4.19 | 3.95 | 9.99  |
| 6.08 | 13.33 | 7.66 | 8    | 2.55 | 1.55 | 7.23 | 6.6  | 11.29 |
| 7.74 | 9.72  | 7.71 | 3.02 | 2.37 | 6.9  | 5.12 | 4.32 | 11    |
| 7.76 | 9.2   | 5.89 | 2.39 | 0    | 5.3  | 3.71 | 2.24 | 10.57 |
| 7.73 | 9     | 5.81 | 2.52 | 0.94 | 5.46 | 4    | 2.16 | 10.57 |
| 6.63 | 3.97  | 7.95 | 7.72 | 0.27 | 0.27 | 5.13 | 7.23 | 6.99  |
| 7.19 | 10.34 | 8.62 | 6.92 | 0    | 7.54 | 5.28 | 6.23 | 10.76 |
| 7.93 | 9.74  | 7.83 | 3.56 | 0    | 7.7  | 5.21 | 5.21 | 13.03 |
| 6.82 | 12.09 | 9.89 | 6.28 | 0.89 | 8.26 | 5.21 | 5.41 | 11.82 |
| 7.67 | 12.81 | 9.94 | 5.3  | 0.3  | 7.57 | 4.62 | 5.26 | 12.98 |
| 7.48 | 11.32 | 9.16 | 6.08 | 1.71 | 6.28 | 5.62 | 6.03 | 12.75 |
| 6.71 | 15.75 | 7.75 | 4.87 | 2.54 | 7.13 | 7.79 | 5.71 | 14.98 |
| 7.65 | 10.21 | 7.98 | 5.84 | 1.8  | 5.01 | 6.14 | 4.44 | 12.39 |
| 7.04 | 9.94  | 9.55 | 5.8  | 2.56 | 6.42 | 5.59 | 5.46 | 11.57 |
| 7.54 | 10.65 | 7.41 | 4.66 | 1.34 | 5    | 6.18 | 4.51 | 12.55 |

1  
2  
3  
4  
5  
6  
7  
8  
9  
10  
11  
12  
13  
14  
15  
16  
17  
18  
19  
20  
21  
22  
23  
24  
25  
26  
27  
28  
29  
30  
31  
32  
33  
34  
35  
36  
37  
38  
39  
40  
41  
42  
43  
44  
45  
46  
47  
48  
49  
50  
51  
52  
53  
54  
55  
56  
57  
58  
59  
60

| TYMP  | UBA52 | UTS2 | VAMP8 | VASH1 | VAV2 | VAV3 | VCAM1 | VCAN |
|-------|-------|------|-------|-------|------|------|-------|------|
| 9.7   | 10.66 | 6.87 | 7.2   | 7.86  | 7.28 | 4.88 | 7.53  | 7.85 |
| 9.52  | 10.74 | 6.52 | 7.37  | 7.26  | 7.86 | 5.01 | 7.08  | 6.84 |
| 9.9   | 10.85 | 6.7  | 7.47  | 7.11  | 7.93 | 5.81 | 7.27  | 6.15 |
| 9.69  | 11.36 | 5.64 | 7.83  | 7.02  | 7.66 | 6.46 | 7.56  | 8.16 |
| 7.74  | 9.37  | 7.84 | 5.33  | 8.92  | 8.38 | 1.01 | 7.24  | 1.01 |
| 8.84  | 10.55 | 6.32 | 7.24  | 6.92  | 7.86 | 3.49 | 7.86  | 8.17 |
| 9.25  | 10.6  | 6.33 | 7.63  | 6.92  | 7.72 | 4.24 | 7.92  | 8.03 |
| 10.52 | 11.53 | 1.98 | 8.86  | 7.3   | 7.7  | 4.48 | 8.53  | 8.71 |
| 10.53 | 11.38 | 2.37 | 8.81  | 7.76  | 6.67 | 6.15 | 8.12  | 9.21 |
| 8.68  | 10.6  | 5.95 | 7.57  | 7.24  | 7.49 | 4.37 | 6.66  | 7.96 |
| 9.32  | 11.16 | 2.96 | 8.38  | 5.87  | 7.29 | 5.7  | 7.26  | 8.1  |
| 9.93  | 11.08 | 2.68 | 8.21  | 6.61  | 7.27 | 4.38 | 7.58  | 8.6  |
| 8.53  | 11.47 | 6.23 | 7.18  | 7.35  | 8.28 | 7.16 | 7.04  | 7.87 |
| 9.14  | 11.26 | 6.37 | 7.2   | 7.61  | 8.22 | 7.11 | 7.91  | 9.06 |
| 11.89 | 12.34 | 3.35 | 9.59  | 8.23  | 8.03 | 4.09 | 8.82  | 8.4  |
| 9.89  | 10.96 | 6.59 | 7.68  | 8.32  | 7.7  | 5.9  | 8.13  | 8.33 |
| 9.28  | 10.82 | 6.24 | 7.83  | 7.99  | 7.72 | 6.04 | 7.65  | 8.11 |
| 9.43  | 10.82 | 6.38 | 7.48  | 8.34  | 7.92 | 5.22 | 7.08  | 8.83 |
| 11.69 | 11.69 | 4.48 | 8.72  | 7.34  | 7.44 | 5.87 | 9.21  | 7.37 |
| 10.31 | 11.78 | 3.12 | 8.23  | 6.99  | 7.58 | 6.58 | 8.29  | 8.03 |
| 10.81 | 11.71 | 3.82 | 8.17  | 7.44  | 7.17 | 7.17 | 8.97  | 7.81 |
| 9.85  | 11.1  | 1.73 | 8.16  | 6.52  | 7.7  | 7.93 | 7.64  | 9.07 |
| 9.84  | 11.17 | 2.78 | 8.18  | 6.2   | 7.77 | 8.42 | 7.57  | 8.46 |
| 9.75  | 11.19 | 1.48 | 8.04  | 6.27  | 7.4  | 7.82 | 7.39  | 8.57 |
| 9.44  | 11.45 | 3.01 | 7.41  | 6.07  | 7.44 | 3.75 | 6.84  | 6.26 |
| 9.92  | 12.15 | 1.13 | 8.27  | 6.08  | 7.22 | 6.52 | 6.65  | 6.04 |
| 9.72  | 11.84 | 2.11 | 8.06  | 6.47  | 7.56 | 7.34 | 6.01  | 5.73 |
| 9.62  | 11.21 | 6.02 | 7.79  | 7.59  | 7.69 | 6.24 | 6.7   | 5.87 |
| 8.3   | 10.99 | 6.72 | 7.31  | 7.27  | 7.88 | 2.87 | 6.72  | 6.17 |
| 9.03  | 10.67 | 6.63 | 7.78  | 7.72  | 8.01 | 4.63 | 6.99  | 6.15 |
| 8.48  | 10.89 | 6.41 | 7.5   | 7.66  | 8.2  | 3.9  | 6.17  | 6.33 |
| 9.09  | 10.69 | 6.99 | 7.46  | 8.25  | 8.12 | 1.71 | 6.96  | 6.2  |
| 9.53  | 11.43 | 5.82 | 7.2   | 8.02  | 7.78 | 6.05 | 9.2   | 3.67 |
| 9.59  | 11.67 | 2.06 | 7.57  | 7.19  | 7.52 | 4.7  | 7.18  | 9.6  |
| 9.24  | 11.83 | 0    | 8     | 7.15  | 7.81 | 4.2  | 6.85  | 8.36 |
| 9.62  | 11.77 | 2.06 | 7.91  | 7.07  | 7.7  | 5.23 | 7.64  | 9.13 |
| 12.07 | 11.68 | 2.45 | 8.46  | 6.47  | 6.17 | 5.09 | 8.71  | 6.09 |
| 11.66 | 11.24 | 2.99 | 8.15  | 5.85  | 6.47 | 4.73 | 7.66  | 7    |
| 11.94 | 10.98 | 3.83 | 7.83  | 6.71  | 5.98 | 4.27 | 8.23  | 7.46 |
| 11.55 | 11.1  | 4.27 | 7.73  | 6.49  | 6.05 | 4.87 | 8.34  | 7.54 |
| 8.7   | 9.87  | 6.33 | 6.39  | 7.26  | 7.44 | 3.76 | 7.04  | 7.1  |
| 8.09  | 9.85  | 6.77 | 6.27  | 6.76  | 7.78 | 2.9  | 7.37  | 7.5  |
| 8.36  | 9.62  | 6.68 | 6.05  | 6.9   | 7.67 | 3.03 | 7.51  | 6.69 |
| 8.66  | 10.1  | 5.34 | 6.89  | 6.17  | 7.89 | 2.14 | 7.85  | 7.48 |
| 10.23 | 11.83 | 3.86 | 8.22  | 7.11  | 7.38 | 3.86 | 6.18  | 5.67 |
| 8.45  | 10.83 | 2.9  | 7.51  | 6.07  | 6.88 | 4.48 | 7.13  | 7.16 |
| 9     | 10.73 | 1.58 | 7.36  | 5.81  | 6.67 | 4    | 7.73  | 8.32 |
| 8.85  | 10.63 | 3.27 | 7.05  | 6.07  | 6.39 | 3.98 | 7.48  | 9.26 |
| 10.88 | 11.78 | 3.63 | 8.76  | 7.4   | 7.89 | 7.33 | 8.4   | 9.03 |
| 11.01 | 11.58 | 2.33 | 8.35  | 6.93  | 7.73 | 8.03 | 8.97  | 9.13 |
| 10.67 | 11.58 | 3.3  | 8.24  | 6.45  | 8.03 | 6.22 | 9.69  | 7.95 |

<https://mc.manuscriptcentral.com/gut>

1  
2  
3  
4  
5  
6  
7  
8  
9  
10  
11  
12  
13  
14  
15  
16  
17  
18  
19  
20  
21  
22  
23  
24  
25  
26  
27  
28  
29  
30  
31  
32  
33  
34  
35  
36  
37  
38  
39  
40  
41  
42  
43  
44  
45  
46  
47  
48  
49  
50  
51  
52  
53  
54  
55  
56  
57  
58  
59  
60

|       |       |      |      |       |       |      |      |      |
|-------|-------|------|------|-------|-------|------|------|------|
| 11.06 | 11.57 | 4.17 | 8.39 | 7.31  | 7.87  | 7.2  | 9.49 | 9.29 |
| 8.39  | 11.25 | 5.62 | 7.95 | 8.16  | 8.05  | 8.65 | 6.74 | 7.62 |
| 8.27  | 11.28 | 5.89 | 8.11 | 7.92  | 8.26  | 8.89 | 7.53 | 7.82 |
| 8.71  | 11.38 | 5.68 | 8.23 | 7.59  | 7.87  | 8.46 | 7.39 | 7.53 |
| 8.89  | 11.15 | 5.85 | 8.48 | 7.72  | 8.05  | 8.71 | 7.19 | 7.83 |
| 9.56  | 11.63 | 4.4  | 8.17 | 6.89  | 7.66  | 5.66 | 7.97 | 7.08 |
| 10.53 | 11.91 | 3.25 | 8.74 | 6.92  | 7.83  | 4.15 | 7.28 | 7.45 |
| 7.94  | 11.75 | 2.32 | 8.52 | 6.08  | 8.23  | 2.91 | 5.87 | 6.5  |
| 9.52  | 12    | 3.44 | 8.35 | 6.42  | 7.78  | 3.76 | 6.91 | 7.49 |
| 9.31  | 11.02 | 1.9  | 7.43 | 6.36  | 8.4   | 3.58 | 6.49 | 7.36 |
| 9.52  | 11.18 | 2.54 | 7.86 | 6.52  | 8.07  | 4.63 | 7.46 | 7.16 |
| 9.26  | 11.11 | 1.4  | 7.52 | 6.46  | 8.19  | 4.06 | 6.62 | 7.16 |
| 9.16  | 11.13 | 1.98 | 7.43 | 6.28  | 8.02  | 4.62 | 6.62 | 7.51 |
| 10.47 | 10.96 | 6.15 | 7.15 | 13.25 | 10.01 | 5.15 | 6.74 | 5.15 |
| 11.17 | 11.81 | 6.04 | 8.6  | 9.34  | 8.64  | 3.11 | 8.11 | 6.18 |
| 10.47 | 11.36 | 7.4  | 7.86 | 8.14  | 7.93  | 3.52 | 8.2  | 6.7  |
| 9.41  | 10.56 | 7.95 | 5.8  | 10.56 | 9.87  | 1.24 | 7.7  | 0.24 |
| 9.27  | 10.41 | 7.75 | 5.86 | 10.63 | 10.18 | 0.77 | 7.13 | 0.77 |
| 7.59  | 11.38 | 6.5  | 7.27 | 7.41  | 8.85  | 2.14 | 6.41 | 6.18 |
| 7.7   | 11.62 | 6.44 | 7.22 | 7.24  | 8.97  | 2.26 | 5.97 | 5.7  |
| 8.5   | 11.28 | 6.63 | 7.33 | 7.78  | 8.84  | 2.84 | 7.29 | 6.77 |
| 9.43  | 12.02 | 4.71 | 8.64 | 6.2   | 9.1   | 6.52 | 7.41 | 8.28 |
| 9.05  | 11.79 | 5.23 | 8.1  | 6.8   | 8.99  | 5.37 | 6.88 | 7.91 |
| 8.15  | 10.9  | 7.07 | 8.03 | 7.72  | 8.8   | 4.86 | 7.57 | 8.04 |
| 10.16 | 12.07 | 2.64 | 8.83 | 6.49  | 8.11  | 5.72 | 8.13 | 8.32 |
| 10.18 | 12.06 | 2.85 | 8.58 | 6.86  | 8.31  | 4.5  | 8.91 | 9.28 |
| 10.08 | 12.04 | 2.69 | 8.6  | 6.33  | 8.46  | 5.64 | 9.52 | 9.67 |
| 9.54  | 11.17 | 6.53 | 7.37 | 7.31  | 7.59  | 7.57 | 7.69 | 8.37 |
| 9.52  | 11.15 | 6.19 | 7.4  | 7.26  | 7.4   | 8.12 | 7.8  | 9    |
| 9.52  | 11.1  | 6.68 | 7.6  | 7.47  | 7.84  | 7.58 | 7.85 | 8.6  |
| 8.37  | 11.05 | 6.64 | 8.43 | 7.79  | 8.51  | 8.64 | 8.38 | 8.52 |
| 8.28  | 11.12 | 6.47 | 8.6  | 7.48  | 8.71  | 8.33 | 7.07 | 7.32 |
| 8.27  | 11.08 | 7.09 | 8.29 | 7.82  | 8.55  | 8.08 | 7.35 | 6.98 |
| 9.77  | 11.37 | 6.8  | 7.66 | 7.61  | 7.73  | 3.82 | 6.62 | 8.91 |
| 9.65  | 11.43 | 6.8  | 7.88 | 7.75  | 7.77  | 2.88 | 6.92 | 8.11 |
| 9.95  | 11.38 | 6.74 | 7.57 | 7.72  | 7.82  | 3.73 | 7.64 | 9    |
| 8.91  | 10.69 | 7.24 | 7.08 | 8.22  | 8.18  | 4.14 | 8.28 | 8.02 |
| 8.91  | 10.69 | 7.24 | 7.08 | 8.22  | 8.18  | 4.14 | 8.28 | 8.02 |
| 8.48  | 11.17 | 7.08 | 7.94 | 7.81  | 8.31  | 3.73 | 7.52 | 6.7  |
| 8.42  | 10.89 | 7.11 | 7.7  | 7.78  | 8.18  | 3.98 | 7.46 | 7.32 |
| 8.58  | 10.99 | 7.02 | 7.47 | 7.7   | 8.27  | 3.01 | 8.26 | 9.14 |
| 8.3   | 10.67 | 7.62 | 6.44 | 7.8   | 7.89  | 5.2  | 8.69 | 5.14 |
| 8.86  | 11.49 | 6.82 | 7.63 | 7.64  | 8.09  | 5.47 | 7.7  | 8.03 |
| 8.31  | 11.95 | 6.5  | 8.18 | 7.11  | 7.96  | 4.53 | 7.43 | 7.35 |
| 8.41  | 11    | 7.48 | 7.49 | 7.79  | 7.72  | 4.42 | 7.73 | 7.05 |
| 9.73  | 11.34 | 2.53 | 7.89 | 6.63  | 7.93  | 8.44 | 7.36 | 8.19 |
| 8.79  | 11.37 | 1.08 | 7.82 | 6.23  | 8.04  | 8.43 | 7.01 | 7.34 |
| 10.48 | 11.49 | 3.1  | 8.32 | 7.45  | 7.86  | 7.81 | 7.55 | 8.23 |
| 8.77  | 10.46 | 7.38 | 6.6  | 7.64  | 7.8   | 4.8  | 8.46 | 6.32 |
| 8.78  | 10.69 | 7    | 6.63 | 7.9   | 7.74  | 3.18 | 8.1  | 8.19 |
| 8.4   | 10.57 | 7.28 | 6.88 | 7.51  | 8.06  | 3.26 | 7.64 | 7.52 |
| 8.56  | 10.16 | 7.24 | 7.27 | 7.11  | 6.63  | 6.23 | 7.57 | 6.87 |

<https://mc.manuscriptcentral.com/gut>

1  
2  
3  
4  
5  
6  
7  
8  
9  
10  
11  
12  
13  
14  
15  
16  
17  
18  
19  
20  
21  
22  
23  
24  
25  
26  
27  
28  
29  
30  
31  
32  
33  
34  
35  
36  
37  
38  
39  
40  
41  
42  
43  
44  
45  
46  
47  
48  
49  
50  
51  
52  
53  
54  
55  
56  
57  
58  
59  
60

|       |       |      |      |       |      |      |      |      |
|-------|-------|------|------|-------|------|------|------|------|
| 8.94  | 10.26 | 6.73 | 7.52 | 6.82  | 6.82 | 6.14 | 7.26 | 7.66 |
| 8.88  | 9.71  | 7.75 | 7.12 | 7.94  | 7.43 | 5.2  | 7.68 | 6.84 |
| 9.65  | 11.4  | 3.95 | 8.07 | 7.42  | 7.65 | 6.04 | 9.04 | 7.1  |
| 10.12 | 11.54 | 1.66 | 8.7  | 7.38  | 7.95 | 7.58 | 7.28 | 8.73 |
| 9.77  | 11.16 | 3.3  | 8.01 | 7.65  | 7.91 | 5.25 | 7.84 | 9.67 |
| 11.63 | 11.6  | 2.99 | 8.87 | 7.57  | 6.99 | 5.99 | 8.81 | 8.21 |
| 9.21  | 11.61 | 0.55 | 7.96 | 6.25  | 7.37 | 3.8  | 7.18 | 8.16 |
| 9.57  | 11.79 | 2.34 | 8.06 | 6.5   | 7.63 | 3.08 | 8.06 | 8.32 |
| 11.3  | 12.38 | 4.08 | 9.69 | 9.12  | 7.25 | 4.49 | 8.52 | 7.92 |
| 9.89  | 11.18 | 0.79 | 8.61 | 7.08  | 8.45 | 5.04 | 8.18 | 8.27 |
| 9.53  | 11.3  | 2.81 | 8.13 | 6.08  | 8.18 | 4.08 | 7.25 | 7.06 |
| 8.56  | 10.2  | 5.96 | 7.52 | 7.07  | 7.93 | 3.06 | 7.01 | 6.3  |
| 11.46 | 11.61 | 4.58 | 9.5  | 8.51  | 8.04 | 3.85 | 8.09 | 8.58 |
| 7.51  | 9.84  | 8.2  | 6.31 | 9.76  | 9.42 | 0    | 7.72 | 0.79 |
| 7.46  | 11.09 | 4.34 | 7.84 | 6.34  | 7.93 | 3.41 | 5.95 | 8.14 |
| 7.58  | 11.11 | 4.83 | 7.81 | 5.45  | 7.82 | 3.74 | 6.39 | 7.43 |
| 7.63  | 11.07 | 4.52 | 7.98 | 5.95  | 7.72 | 3.52 | 6.19 | 7.85 |
| 11.61 | 10.66 | 2.89 | 8.96 | 6.51  | 7.63 | 4.56 | 8.99 | 8.07 |
| 11.14 | 9.96  | 5.28 | 8.14 | 7.4   | 7.72 | 3.52 | 8.37 | 8.21 |
| 11.54 | 10.34 | 3.92 | 8.53 | 7.48  | 7.85 | 3.98 | 8.52 | 8.28 |
| 11.84 | 9.86  | 6.75 | 9.33 | 10.66 | 7.75 | 5.16 | 7.16 | 5.16 |
| 8.94  | 10.6  | 0    | 8.11 | 5.61  | 6.78 | 5.86 | 6.91 | 6.45 |
| 10.09 | 10.84 | 1.54 | 8.29 | 6.34  | 6.96 | 5.54 | 7.62 | 7.19 |
| 9.72  | 11.49 | 5.27 | 8.87 | 6.7   | 6.77 | 6.73 | 7.2  | 8.16 |
| 10.1  | 11.72 | 5.43 | 9.32 | 7.63  | 7.25 | 6.58 | 6.79 | 8.32 |
| 9.93  | 11.33 | 4.71 | 8.26 | 7.32  | 7.16 | 6.52 | 8.52 | 9.66 |
| 8.51  | 9.58  | 8.13 | 6.21 | 8.6   | 8.03 | 3.8  | 7.7  | 2.58 |
| 7.44  | 9.61  | 8.02 | 5.67 | 8.92  | 8.33 | 0.86 | 7.76 | 3.18 |
| 6.98  | 8.55  | 8.07 | 5.23 | 8.52  | 8.03 | 1.77 | 7.09 | 3.35 |
| 8.37  | 10.04 | 1.59 | 6.89 | 5.87  | 6.89 | 5.44 | 8.04 | 8.93 |
| 8.21  | 10.45 | 0    | 6.5  | 5.72  | 6.95 | 4.95 | 7.81 | 8.92 |
| 8.51  | 10.53 | 1.11 | 7.62 | 5.78  | 6.86 | 4.2  | 7.03 | 8    |
| 8.56  | 10.65 | 0.16 | 6.46 | 6.2   | 6.13 | 3.74 | 8.46 | 9.59 |
| 7.72  | 8.66  | 7.05 | 5.88 | 8.22  | 7.55 | 2.04 | 6.5  | 2.77 |
| 7.5   | 8.42  | 7.03 | 6.34 | 7.21  | 7.37 | 0.25 | 6.87 | 1.25 |
| 8.1   | 8.5   | 6.52 | 6.47 | 7.21  | 7.28 | 0    | 6.29 | 3.51 |
| 7.53  | 8.76  | 7.38 | 4.45 | 8.71  | 8.27 | 0    | 6.61 | 0    |
| 7.27  | 8.54  | 7.14 | 4.92 | 7.74  | 7.54 | 1.34 | 7.14 | 1.34 |
| 6.42  | 8.6   | 7.52 | 4.56 | 7.59  | 6.65 | 1.1  | 7.07 | 2.68 |
| 6.92  | 8.59  | 7.38 | 5.63 | 7.43  | 7.32 | 0.31 | 7.02 | 3.31 |
| 8.48  | 8.17  | 5    | 2.41 | 10.24 | 8.34 | 2.41 | 4.41 | 2.41 |
| 8.1   | 9.75  | 8.12 | 5.91 | 8.68  | 8.48 | 1.06 | 7.76 | 4.38 |
| 7.77  | 9.72  | 8.38 | 5.74 | 9.21  | 8.62 | 0    | 7.93 | 0    |
| 9.4   | 10.19 | 7.51 | 7.98 | 8.26  | 7.92 | 0.87 | 7.1  | 5.26 |
| 8.33  | 9.36  | 8.11 | 6.56 | 8.72  | 8.33 | 1.33 | 7.52 | 3.21 |
| 8.59  | 10.24 | 7.45 | 6.65 | 7.8   | 7.79 | 3    | 7.59 | 6.11 |
| 8.15  | 9.77  | 8.08 | 6.56 | 8.08  | 8.22 | 1.88 | 7.35 | 4.2  |
| 7.49  | 9.34  | 8.21 | 5.71 | 7.93  | 8.08 | 0.71 | 7.42 | 0.71 |
| 8.09  | 9.59  | 8.39 | 5.07 | 8.22  | 8.57 | 0    | 7.33 | 3.99 |
| 8     | 10.47 | 6.69 | 6.94 | 6.3   | 7.8  | 3.08 | 7.1  | 7.05 |
| 8.61  | 10.92 | 6.63 | 7.11 | 6.3   | 7.91 | 5.44 | 6.64 | 7.46 |
| 8.59  | 10.95 | 6.53 | 7.03 | 6.78  | 7.98 | 5.12 | 6.79 | 7.46 |

<https://mc.manuscriptcentral.com/gut>

|    |       |       |      |       |      |      |      |      |      |
|----|-------|-------|------|-------|------|------|------|------|------|
| 1  |       |       |      |       |      |      |      |      |      |
| 2  | 8.31  | 10.54 | 6.85 | 6.93  | 6.73 | 7.93 | 5.55 | 7.11 | 6.85 |
| 3  | 10.09 | 11.17 | 6.35 | 8.94  | 7.72 | 8.65 | 5.56 | 8.02 | 8.98 |
| 4  | 9.69  | 11.2  | 6.55 | 8.93  | 8.07 | 8.4  | 5.14 | 7.81 | 8.68 |
| 5  | 9.92  | 10.79 | 6.47 | 8.33  | 7.36 | 8.6  | 5.83 | 6.93 | 7.56 |
| 6  | 10.06 | 11    | 6.61 | 8.44  | 7.32 | 8.49 | 5.99 | 7.09 | 7.73 |
| 7  | 10.46 | 11.35 | 6.27 | 8.02  | 7.85 | 8.41 | 6.12 | 8.48 | 8.34 |
| 8  | 11.07 | 11.92 | 3.43 | 8.96  | 7.8  | 8.02 | 7.09 | 8.1  | 7.71 |
| 9  | 10.41 | 11.51 | 3.3  | 8.5   | 7.12 | 7.88 | 6.86 | 8.13 | 7.42 |
| 10 | 11.23 | 11.89 | 4.55 | 8.67  | 8.21 | 7.4  | 7.52 | 8.6  | 7.8  |
| 11 | 10.33 | 11.79 | 3.76 | 8.49  | 8.08 | 9.24 | 5.35 | 7.14 | 9.09 |
| 12 | 10.03 | 11.73 | 4.07 | 7.99  | 8.23 | 8.41 | 5.25 | 7.39 | 9.07 |
| 13 | 10.32 | 11.47 | 3.55 | 8.04  | 8.27 | 8.48 | 4.91 | 7.29 | 9.24 |
| 14 | 9.56  | 11.58 | 2.06 | 7.93  | 8.04 | 8.48 | 4.52 | 6.79 | 8.57 |
| 15 | 9.03  | 11.08 | 6.58 | 8.18  | 7.04 | 7.45 | 5.21 | 7.9  | 7.08 |
| 16 | 9.51  | 11.34 | 1.09 | 8.66  | 6.51 | 7.22 | 4.64 | 7.19 | 7.93 |
| 17 | 9.41  | 11.2  | 6.41 | 8.09  | 7.62 | 7.11 | 4.23 | 7.81 | 8.17 |
| 18 | 9.81  | 11.76 | 3    | 7.57  | 7.27 | 7.24 | 5.97 | 9.27 | 8.57 |
| 19 | 9.34  | 11.92 | 3.67 | 7.75  | 6.62 | 7.62 | 6.37 | 7.56 | 8.58 |
| 20 | 10.15 | 11.46 | 1.52 | 7.8   | 7.54 | 7.47 | 5.27 | 7.56 | 8.66 |
| 21 | 9.46  | 11.41 | 2.25 | 7.54  | 6.12 | 7.79 | 5.76 | 7.64 | 8.62 |
| 22 | 8.86  | 11.95 | 2.87 | 7.98  | 5.87 | 7.23 | 6.98 | 7.52 | 9.3  |
| 23 | 7.75  | 11.75 | 0    | 8.44  | 5.12 | 7.02 | 9.13 | 6.44 | 8.05 |
| 24 | 9.18  | 10.59 | 6.39 | 7.75  | 7.74 | 7.57 | 3.91 | 8.01 | 7.35 |
| 25 | 9.24  | 10.35 | 5.93 | 7.96  | 7.27 | 7.47 | 3.74 | 7.86 | 7.51 |
| 26 | 10.55 | 11.45 | 5.47 | 9.01  | 9.3  | 7.4  | 4.74 | 7.47 | 7.74 |
| 27 | 8.91  | 10.75 | 2.95 | 7.05  | 4.89 | 6.12 | 5.36 | 8.72 | 6.47 |
| 28 | 8.76  | 10.13 | 3.38 | 6.7   | 6.22 | 6.65 | 4.96 | 7.35 | 7.25 |
| 29 | 8.96  | 10.73 | 1.35 | 7.04  | 5.81 | 7.39 | 6.72 | 7.17 | 7.48 |
| 30 | 8.07  | 11.06 | 2.9  | 5.48  | 4.9  | 6.48 | 4.9  | 8.26 | 8.39 |
| 31 | 7.15  | 8.64  | 7.64 | 4.93  | 8.02 | 6.97 | 1.76 | 6.8  | 1.76 |
| 32 | 7.2   | 8.81  | 7.02 | 5.93  | 7.39 | 7.2  | 1.72 | 7.08 | 4.04 |
| 33 | 6.5   | 8.7   | 7.65 | 4.97  | 7.33 | 7.38 | 0.88 | 6.99 | 2.47 |
| 34 | 6.84  | 8.73  | 7.11 | 4.76  | 7.59 | 7.43 | 1.96 | 6.74 | 3.28 |
| 35 | 8.1   | 9.53  | 5.7  | 6.38  | 6.9  | 6.94 | 3.27 | 6.88 | 5.24 |
| 36 | 7.96  | 9.18  | 6.14 | 6.07  | 7.14 | 7.13 | 3.47 | 6.65 | 4.95 |
| 37 | 7.94  | 9.01  | 6.23 | 5.98  | 7.11 | 6.8  | 2.77 | 6.71 | 6.07 |
| 38 | 8.39  | 9.26  | 5.84 | 6.48  | 7.04 | 6.77 | 2.49 | 7.85 | 7.07 |
| 39 | 9.03  | 12.24 | 1.94 | 7.57  | 6.33 | 7.52 | 7.21 | 9.97 | 4.05 |
| 40 | 8.92  | 11.09 | 4.27 | 7.8   | 7.34 | 7.34 | 7.22 | 7.67 | 7.02 |
| 41 | 11.08 | 11.7  | 2.42 | 8.87  | 7.21 | 6.83 | 4.67 | 8.29 | 6.97 |
| 42 | 12.12 | 12.57 | 3.23 | 10.12 | 8.48 | 7.19 | 5.82 | 8.69 | 5.04 |
| 43 | 8.8   | 11.13 | 5.41 | 7.45  | 7.57 | 7.93 | 6.52 | 7.42 | 8.14 |
| 44 | 11.76 | 11.95 | 4.51 | 9.83  | 8.21 | 6.83 | 4.51 | 8.76 | 7.1  |
| 45 | 9.3   | 11.61 | 2.45 | 7.38  | 6.69 | 7.24 | 7.05 | 8.26 | 8.2  |
| 46 | 9.56  | 11.5  | 2.52 | 7.58  | 6.72 | 7.08 | 6.89 | 8.03 | 9.3  |
| 47 | 5.77  | 10.45 | 2.27 | 7.79  | 4.59 | 8.07 | 8.91 | 3    | 5.14 |
| 48 | 9.43  | 10.88 | 4.31 | 7.8   | 7    | 7.64 | 7.15 | 6.88 | 7.48 |
| 49 | 8.6   | 10.77 | 2.28 | 7.8   | 6.06 | 7.42 | 7.68 | 6.95 | 7.74 |
| 50 | 8.88  | 10.56 | 5.72 | 7.13  | 7.09 | 7.63 | 6.98 | 7.3  | 7.76 |
| 51 | 9.38  | 10.56 | 1.16 | 7.56  | 6.39 | 6.63 | 4.62 | 7.07 | 8.79 |
| 52 | 8.13  | 9.66  | 5.17 | 6.81  | 6.41 | 7.07 | 3.11 | 6.23 | 6.64 |
| 53 | 8.57  | 9.45  | 5.67 | 6.89  | 6.74 | 6.93 | 3.16 | 6.21 | 6.4  |

<https://mc.manuscriptcentral.com/gut>

|       |       |      |      |      |      |      |      |      |
|-------|-------|------|------|------|------|------|------|------|
| 9.05  | 10.21 | 0.79 | 7.25 | 6.11 | 6.4  | 2.79 | 6.31 | 7.22 |
| 8.13  | 10.57 | 3.68 | 6.05 | 8.66 | 7.46 | 5.49 | 6.35 | 9.39 |
| 7.77  | 10.55 | 4.29 | 6.42 | 8.35 | 7.85 | 5.11 | 5.54 | 7.01 |
| 7.85  | 10.69 | 3.29 | 6.57 | 8.13 | 7.85 | 5.7  | 5.39 | 7.26 |
| 8.25  | 9.25  | 6.95 | 6.36 | 9.42 | 8.08 | 2.55 | 6.64 | 4.14 |
| 9.19  | 10.52 | 1.89 | 6.89 | 5.79 | 6.9  | 5.81 | 7.45 | 7.5  |
| 8.91  | 10.99 | 0.07 | 7.49 | 5.82 | 6    | 6.8  | 5.53 | 5.44 |
| 8.84  | 11.1  | 0.94 | 7.66 | 5.44 | 6.04 | 6.61 | 5.28 | 4.94 |
| 6.97  | 8.77  | 7.72 | 5.52 | 8.38 | 7.86 | 0.27 | 7.04 | 1.27 |
| 7.78  | 9.91  | 6.89 | 6.23 | 7.41 | 7.2  | 4.39 | 7.17 | 5.99 |
| 8.98  | 11.08 | 2.46 | 7.8  | 7.65 | 7.07 | 6.05 | 8.02 | 8.45 |
| 8.36  | 10.71 | 5.35 | 7.32 | 7.59 | 7.28 | 5.14 | 6.59 | 7.84 |
| 8.89  | 10.85 | 2.3  | 7.48 | 7.64 | 7.1  | 4.55 | 7.28 | 7.69 |
| 8.83  | 10.7  | 4.59 | 6.77 | 7.85 | 7.28 | 5.21 | 7.19 | 9.2  |
| 10.81 | 11.92 | 4.13 | 9.38 | 9.22 | 7.4  | 2.54 | 6.54 | 5.54 |
| 9.44  | 10.51 | 2.61 | 8.13 | 6.71 | 7.09 | 3.97 | 7.05 | 6.31 |
| 8.74  | 10.14 | 5.42 | 7.33 | 6.66 | 6.86 | 2.93 | 7.02 | 5.93 |
| 9.54  | 10.52 | 2.75 | 8.22 | 6.66 | 7.22 | 3.92 | 7.24 | 6.15 |



1  
2  
3  
4  
5  
6  
7  
8  
9  
10  
11  
12  
13  
14  
15  
16  
17  
18  
19  
20  
21  
22  
23  
24  
25  
26  
27  
28  
29  
30  
31  
32  
33  
34  
35  
36  
37  
38  
39  
40  
41  
42  
43  
44  
45  
46  
47  
48  
49  
50  
51  
52  
53  
54  
55  
56  
57  
58  
59  
60

| VEGFA | VEGFB | VEGFC | VEZF1 | VHL   | VIM   | VIT  | VPS13A | VSIG4 |
|-------|-------|-------|-------|-------|-------|------|--------|-------|
| 9.02  | 8.18  | 6.72  | 7.28  | 8.87  | 11.65 | 6.63 | 7.23   | 8.25  |
| 12.91 | 7.99  | 5.84  | 7.4   | 8.76  | 12.08 | 6.26 | 8.33   | 8.16  |
| 11.99 | 8.03  | 6.47  | 7.07  | 8.76  | 11.88 | 6.06 | 7.83   | 8.12  |
| 13    | 9.01  | 7.25  | 7.64  | 9.41  | 13.39 | 5.5  | 8.55   | 9.32  |
| 7.08  | 7.67  | 7.14  | 8.46  | 8.7   | 6.94  | 7.85 | 2.01   | 7.35  |
| 10.3  | 7.94  | 6.47  | 7.71  | 8.74  | 11.77 | 6.26 | 7.71   | 7.49  |
| 10.16 | 7.78  | 6.86  | 7.57  | 8.69  | 12.17 | 6.09 | 7.9    | 7.69  |
| 11.29 | 8.74  | 6.6   | 7.71  | 9.77  | 13.16 | 3.85 | 7.96   | 8.91  |
| 10.73 | 9.5   | 6.91  | 7.22  | 9.72  | 13.31 | 4.76 | 7.97   | 9.26  |
| 10.65 | 7.68  | 6.83  | 7.1   | 8.81  | 11.39 | 6.02 | 7.65   | 7.3   |
| 10.55 | 8.24  | 5.81  | 7.2   | 9.33  | 12.26 | 4.96 | 8.69   | 7.75  |
| 11.11 | 8.46  | 6.81  | 7.19  | 9.32  | 13.1  | 5.38 | 8.44   | 9.2   |
| 9.18  | 8.27  | 6.09  | 7.81  | 9.22  | 11.26 | 6.45 | 10     | 6.28  |
| 8.86  | 8.68  | 6.71  | 7.49  | 9.13  | 12.4  | 6.24 | 9.06   | 6.84  |
| 9.73  | 9.86  | 7.38  | 7.96  | 10.49 | 13.94 | 4.35 | 7.29   | 9.2   |
| 10.83 | 9.04  | 7.32  | 7.81  | 9.07  | 12.88 | 6.62 | 7.57   | 8.1   |
| 10.41 | 9.36  | 7.07  | 7.9   | 9.13  | 12.38 | 6.65 | 7.57   | 7.93  |
| 11.13 | 9.36  | 7.01  | 7.9   | 9.24  | 12.98 | 6.54 | 7.1    | 8.2   |
| 11.73 | 9.07  | 7.79  | 7.76  | 10.37 | 13.6  | 5.18 | 8.55   | 8.4   |
| 11.86 | 8.95  | 6.83  | 7.89  | 9.84  | 12.82 | 4.73 | 8.79   | 7.67  |
| 11.59 | 9.07  | 7.48  | 7.95  | 9.95  | 13.25 | 4.71 | 8.72   | 8.01  |
| 9.96  | 9.15  | 6.67  | 8.03  | 9.51  | 13.13 | 4.54 | 9.25   | 8.74  |
| 9.97  | 9.23  | 6.48  | 8.05  | 9.4   | 12.98 | 4.29 | 8.86   | 8.52  |
| 10.11 | 9.47  | 6.37  | 8.1   | 9.22  | 13.03 | 4.06 | 8.94   | 8.82  |
| 11.53 | 8.77  | 5.47  | 6.89  | 9.73  | 12.16 | 4.13 | 8.28   | 8.34  |
| 11.53 | 9.11  | 4.59  | 7.22  | 9.86  | 11.52 | 4.94 | 8.35   | 6.43  |
| 11.49 | 9.11  | 5.33  | 7.38  | 9.65  | 11.55 | 5.04 | 8.26   | 6.63  |
| 11.09 | 9.01  | 6.26  | 7.59  | 9.57  | 11.67 | 6.39 | 8.08   | 7.27  |
| 10.05 | 8.32  | 6.48  | 7.39  | 9.22  | 11.09 | 6.25 | 8.19   | 6.96  |
| 9.93  | 8.36  | 6.08  | 7.47  | 9.17  | 11.64 | 6.34 | 8.38   | 7.57  |
| 10.21 | 8.54  | 6.64  | 7.57  | 9.19  | 11.05 | 6.33 | 8.28   | 7.2   |
| 9.61  | 8.28  | 7.12  | 7.57  | 9.18  | 11.45 | 7.05 | 7.65   | 7.95  |
| 9.1   | 8.75  | 6.38  | 7.64  | 9.42  | 12.68 | 6.7  | 7.79   | 7.46  |
| 11.77 | 9.51  | 6.93  | 8.02  | 9.33  | 13.27 | 3.97 | 8.97   | 9.2   |
| 12.08 | 8.92  | 6.07  | 7.83  | 9.5   | 12.61 | 4.97 | 9.36   | 8.11  |
| 11.85 | 9.32  | 6.68  | 7.42  | 9.51  | 13.09 | 4.64 | 8.88   | 9.26  |
| 8.1   | 7.71  | 6.33  | 6.84  | 9.57  | 12.83 | 3.25 | 7.03   | 6.94  |
| 8.56  | 7.41  | 5.47  | 6.92  | 9.2   | 12.29 | 3.73 | 7.97   | 7.71  |
| 7.61  | 7.92  | 5.95  | 6.74  | 9.16  | 12.65 | 3.69 | 7.94   | 8.18  |
| 7.53  | 7.74  | 5.36  | 6.95  | 9.22  | 12.52 | 3.83 | 7.86   | 8.13  |
| 10.41 | 7.54  | 6.85  | 7     | 8.28  | 11.44 | 6.35 | 7.35   | 7.14  |
| 10.52 | 7.57  | 6.58  | 7.12  | 8.13  | 10.97 | 6.42 | 7.45   | 6.58  |
| 10.19 | 7.65  | 6.33  | 7.16  | 7.8   | 10.7  | 6.79 | 7.36   | 6.31  |
| 10.78 | 7.73  | 5.72  | 6.88  | 8.31  | 11.05 | 5.96 | 8.23   | 5.75  |
| 10.88 | 9.13  | 4.86  | 6.95  | 10.62 | 12.49 | 5.67 | 6.03   | 7.45  |
| 10.58 | 8.25  | 5.36  | 7.6   | 8.74  | 12.15 | 4.31 | 8.04   | 6.72  |
| 11.01 | 8.59  | 6.15  | 7.72  | 8.71  | 12.71 | 3.46 | 7.92   | 6.7   |
| 10.48 | 8.95  | 6.39  | 7.5   | 8.75  | 13.38 | 4.2  | 8.09   | 7.11  |
| 10.58 | 9.65  | 6.97  | 7.31  | 9.86  | 13.31 | 4.88 | 8.46   | 9.5   |
| 10.98 | 9.22  | 6.95  | 7.68  | 9.55  | 13.1  | 4.53 | 8.3    | 8.38  |
| 10.52 | 9.15  | 5.7   | 7.48  | 9.58  | 12.32 | 4.2  | 8.77   | 8.56  |

<https://mc.manuscriptcentral.com/gut>

1  
2  
3  
4  
5  
6  
7  
8  
9  
10  
11  
12  
13  
14  
15  
16  
17  
18  
19  
20  
21  
22  
23  
24  
25  
26  
27  
28  
29  
30  
31  
32  
33  
34  
35  
36  
37  
38  
39  
40  
41  
42  
43  
44  
45  
46  
47  
48  
49  
50  
51  
52  
53  
54  
55  
56  
57  
58  
59  
60

|       |      |      |      |       |       |      |       |      |
|-------|------|------|------|-------|-------|------|-------|------|
| 10.77 | 9.33 | 7.13 | 7.71 | 9.59  | 13.22 | 4.4  | 8.45  | 9    |
| 10.68 | 8.78 | 6.12 | 7.78 | 10.15 | 11.49 | 6.54 | 9.11  | 6.69 |
| 10.33 | 8.77 | 6.89 | 7.8  | 9.93  | 11.95 | 6.46 | 9.2   | 6.05 |
| 10.13 | 8.74 | 6.51 | 7.91 | 9.93  | 11.7  | 6.43 | 8.98  | 5.84 |
| 10    | 8.78 | 6.76 | 7.81 | 9.85  | 11.8  | 6.52 | 9.2   | 6.7  |
| 10.39 | 9.24 | 6.74 | 7.79 | 9.94  | 12.86 | 5.69 | 9.52  | 7.14 |
| 11.02 | 9.38 | 6.36 | 8.15 | 9.88  | 12.47 | 5.15 | 9.56  | 8.3  |
| 11.03 | 9.49 | 5.31 | 7.99 | 10.01 | 11.37 | 5.43 | 10.08 | 5.91 |
| 12.2  | 9.74 | 6.35 | 8.16 | 9.77  | 12.52 | 5.61 | 9.91  | 7.62 |
| 11.06 | 9.13 | 5.34 | 7.72 | 9.23  | 12.15 | 5.2  | 8.21  | 7.87 |
| 10.1  | 8.79 | 5.45 | 7.68 | 9.41  | 12.38 | 4.45 | 8.55  | 6.79 |
| 10.09 | 8.88 | 4.94 | 7.6  | 9.29  | 11.97 | 4.62 | 7.92  | 6.58 |
| 10.01 | 8.97 | 5.34 | 7.73 | 9.18  | 12.19 | 4.07 | 8.18  | 7.61 |
| 9.06  | 7.96 | 5.15 | 8.61 | 9.79  | 10.61 | 5.15 | 7.47  | 9.47 |
| 9.7   | 8.52 | 6.62 | 8    | 10.14 | 12.64 | 6.83 | 6.96  | 10.1 |
| 9.43  | 8.57 | 6.84 | 8.09 | 9.52  | 11.97 | 7.25 | 6.86  | 9.35 |
| 7.54  | 9.5  | 6.95 | 9.25 | 8.68  | 2.57  | 8.96 | 0.24  | 8.41 |
| 7.65  | 9.07 | 7.13 | 8.78 | 8.68  | 7.53  | 8.61 | 1.77  | 7.71 |
| 10.47 | 7.48 | 6.16 | 7.88 | 9.61  | 10.75 | 6.05 | 9.05  | 5.78 |
| 10.53 | 7.42 | 5.85 | 8.02 | 9.6   | 10.28 | 6.35 | 9.13  | 5.43 |
| 10.13 | 7.73 | 6.27 | 7.92 | 9.68  | 10.7  | 6.4  | 8.94  | 6.54 |
| 11.58 | 9.31 | 6.75 | 8.21 | 9.73  | 12.85 | 5.16 | 9.41  | 7.96 |
| 11.46 | 8.87 | 6.69 | 8.34 | 9.68  | 12.61 | 6.3  | 9.41  | 7.53 |
| 10.83 | 8.41 | 7.26 | 8.3  | 8.86  | 12.68 | 7.48 | 9.03  | 7.92 |
| 10.71 | 8.98 | 6.34 | 8.07 | 10.09 | 13.07 | 5.59 | 9.24  | 7.65 |
| 11.01 | 9.06 | 7.15 | 8.37 | 10.25 | 13.3  | 5.21 | 8.91  | 7.97 |
| 11.46 | 9.45 | 7.85 | 8.57 | 10.21 | 13.78 | 5.28 | 9.1   | 8.59 |
| 10.22 | 8.28 | 6.78 | 8.19 | 9.11  | 11.93 | 6.51 | 7.75  | 7.8  |
| 10.19 | 8.26 | 6.92 | 8.01 | 9.12  | 12.07 | 6.17 | 7.71  | 7.82 |
| 10.22 | 8.36 | 7.06 | 8.07 | 9.08  | 11.92 | 6.8  | 7.76  | 8.29 |
| 10.24 | 8.85 | 7.21 | 8.27 | 9.55  | 12.6  | 7.3  | 9.26  | 7.77 |
| 9.62  | 8.94 | 6.72 | 8.21 | 9.58  | 11.45 | 6.98 | 9.2   | 7.63 |
| 9.96  | 8.57 | 6.73 | 8.36 | 9.61  | 11.19 | 7.32 | 9.04  | 7.47 |
| 9.73  | 9.15 | 6.81 | 8.2  | 9.21  | 12.42 | 6.61 | 7.53  | 8.18 |
| 9.88  | 8.69 | 6.52 | 8.01 | 9.17  | 12.26 | 6.55 | 7.83  | 7.97 |
| 9.86  | 9.06 | 7.21 | 8.04 | 9.22  | 13.09 | 6.51 | 7.22  | 8.86 |
| 9.19  | 8.66 | 7.19 | 8.03 | 9.23  | 12.54 | 7.26 | 7.4   | 7.28 |
| 9.19  | 8.66 | 7.19 | 8.03 | 9.23  | 12.54 | 7.26 | 7.4   | 7.28 |
| 9.44  | 8.67 | 6.28 | 8.03 | 9.47  | 11.91 | 6.85 | 7.29  | 7.48 |
| 9.7   | 8.85 | 7.31 | 8.1  | 9.11  | 12.45 | 7.43 | 7.98  | 7.97 |
| 9.9   | 9.28 | 7.19 | 8.39 | 9.18  | 12.79 | 6.98 | 7.81  | 7.99 |
| 8.38  | 8.29 | 7.56 | 7.9  | 9     | 11.42 | 7.49 | 6.58  | 6.66 |
| 10.05 | 9.14 | 7.13 | 7.75 | 8.97  | 12.11 | 7.07 | 6.91  | 7.53 |
| 10.26 | 9.2  | 6.62 | 7.66 | 9.01  | 11.84 | 6.61 | 7.47  | 7.21 |
| 9.07  | 8.61 | 7.35 | 8.08 | 8.81  | 11.89 | 7.49 | 6.74  | 8.13 |
| 10.11 | 8.84 | 6.44 | 7.98 | 9.52  | 12.63 | 5.28 | 9.3   | 8.3  |
| 10.21 | 8.1  | 5.12 | 8.01 | 9.46  | 11.85 | 5.6  | 8.85  | 6.82 |
| 9.69  | 8.79 | 6.6  | 7.53 | 9.58  | 13.16 | 5.56 | 8.56  | 9.71 |
| 8.45  | 7.91 | 7.47 | 7.78 | 8.89  | 11.66 | 7.06 | 6.6   | 7.56 |
| 9     | 8.95 | 7.64 | 7.81 | 8.76  | 12.67 | 6.99 | 7.36  | 8.05 |
| 8.81  | 8.98 | 7.2  | 7.61 | 8.59  | 12.27 | 7.03 | 7.31  | 7.81 |
| 9.44  | 7.62 | 6.87 | 7.54 | 9.54  | 11.08 | 6.72 | 8.06  | 7.37 |

<https://mc.manuscriptcentral.com/gut>

|    |       |      |      |      |       |       |      |      |       |
|----|-------|------|------|------|-------|-------|------|------|-------|
| 1  |       |      |      |      |       |       |      |      |       |
| 2  | 9.8   | 7.95 | 7.05 | 7.5  | 9.67  | 11.45 | 6.57 | 8.21 | 7.08  |
| 3  | 8.82  | 8.19 | 7.07 | 7.77 | 9.37  | 11.59 | 7.59 | 5.97 | 7.94  |
| 4  | 10.27 | 8.85 | 6.27 | 7.64 | 9.56  | 12.95 | 6.07 | 8.02 | 7.37  |
| 5  | 9.81  | 9.2  | 7.14 | 7.91 | 9.42  | 13.22 | 6.16 | 8.49 | 8.61  |
| 6  | 9.56  | 9.83 | 7.31 | 7.71 | 9.55  | 13.75 | 5.53 | 8.78 | 9.56  |
| 7  | 9.25  | 8.77 | 6.19 | 7.35 | 9.91  | 13.34 | 4.11 | 7.78 | 8.38  |
| 8  | 11.14 | 8.31 | 6.21 | 7.75 | 9.72  | 12.4  | 4.07 | 7.97 | 7.7   |
| 9  | 10.82 | 8.38 | 6.64 | 7.69 | 9.82  | 12.53 | 4.34 | 7.92 | 8.02  |
| 10 | 10.87 | 9.34 | 6.49 | 7.25 | 11.17 | 14.44 | 4.49 | 7.14 | 11.08 |
| 11 | 11.35 | 8.61 | 7.17 | 7.51 | 10.16 | 13.05 | 4.7  | 8.71 | 8.96  |
| 12 | 11.57 | 8.47 | 5.19 | 7.87 | 9.69  | 11.7  | 4.58 | 8.68 | 6.64  |
| 13 | 10.99 | 7.79 | 6.48 | 7.64 | 9.03  | 10.38 | 6.4  | 8.01 | 6.23  |
| 14 | 11.54 | 9.57 | 7.9  | 7.21 | 10.95 | 13.92 | 5.07 | 7.69 | 9.41  |
| 15 | 6.74  | 8.62 | 7.07 | 8.88 | 9.05  | 1.2   | 9.07 | 0.79 | 7.11  |
| 16 | 9.83  | 7.58 | 6.03 | 7.36 | 9.2   | 11.75 | 5.3  | 8.6  | 5.08  |
| 17 | 10.37 | 7.02 | 5.36 | 7.51 | 9.22  | 11.55 | 3.74 | 8.45 | 4.79  |
| 18 | 10.09 | 7.64 | 5.61 | 7.5  | 9.13  | 11.67 | 4.65 | 8.37 | 5.82  |
| 19 | 9.75  | 8.07 | 6.02 | 7.32 | 9.23  | 12.28 | 3.43 | 8.38 | 8.06  |
| 20 | 9.17  | 8.28 | 6.17 | 7.35 | 8.76  | 11.94 | 6.31 | 7.33 | 7.92  |
| 21 | 9.52  | 8.29 | 6.59 | 7.15 | 9.05  | 12.53 | 5.92 | 7.55 | 8.99  |
| 22 | 7.97  | 8.75 | 5.16 | 7.16 | 11.12 | 13.02 | 5.16 | 6.16 | 9.41  |
| 23 | 10.57 | 9.19 | 4.13 | 7.16 | 8.62  | 11.51 | 4.26 | 7.66 | 3.78  |
| 24 | 10.03 | 9    | 5.86 | 7.07 | 8.84  | 12.41 | 4.71 | 8.09 | 5.49  |
| 25 | 10.51 | 9.23 | 5.7  | 7.29 | 9.97  | 12.61 | 4.77 | 7.52 | 7.72  |
| 26 | 10.88 | 9.47 | 6.95 | 7.23 | 10.45 | 13.29 | 3.91 | 7.79 | 8.93  |
| 27 | 10.43 | 9.47 | 7.08 | 6.81 | 9.79  | 13.53 | 3.54 | 8.07 | 8.76  |
| 28 | 8.11  | 8.33 | 7.54 | 7.95 | 8.63  | 9.4   | 7.71 | 2    | 7.52  |
| 29 | 7.23  | 8.21 | 8.04 | 8.17 | 8.63  | 0.86  | 7.75 | 2.86 | 7.41  |
| 30 | 6.72  | 7.57 | 7.57 | 8.02 | 8.34  | 2.77  | 7.96 | 3.77 | 7.6   |
| 31 | 9.47  | 8.39 | 5.96 | 6.55 | 8.25  | 12.59 | 3.59 | 7.6  | 7.55  |
| 32 | 9.33  | 9.29 | 6.15 | 7.01 | 8.27  | 12.84 | 4.29 | 6.46 | 7.41  |
| 33 | 9.41  | 8.44 | 5.11 | 6.58 | 8.4   | 12.32 | 3.43 | 7.46 | 7.31  |
| 34 | 10.3  | 9.37 | 5.74 | 6.71 | 8.14  | 13.51 | 4.06 | 7.47 | 8.23  |
| 35 | 6.62  | 7.79 | 6.33 | 7.02 | 7.97  | 9.39  | 7.12 | 1.45 | 7.62  |
| 36 | 6.97  | 6.99 | 6.66 | 7.23 | 7.31  | 7.43  | 6.95 | 2.84 | 6.03  |
| 37 | 7.64  | 7.23 | 6.31 | 7.2  | 7.44  | 8.35  | 6.9  | 4.55 | 6.23  |
| 38 | 6.48  | 7.82 | 5.88 | 8.21 | 7.35  | 0     | 7.69 | 0    | 6.76  |
| 39 | 6.69  | 7.22 | 6.79 | 7.34 | 7.79  | 7.98  | 7.14 | 1.34 | 6.14  |
| 40 | 6.38  | 7.36 | 7    | 7.05 | 7.59  | 7.88  | 7.23 | 2.1  | 6.56  |
| 41 | 7.15  | 7.22 | 6.67 | 7.22 | 7.42  | 8.34  | 7.05 | 0.31 | 6.17  |
| 42 | 5.41  | 7    | 4    | 7.9  | 6.58  | 5     | 7    | 2.41 | 6.66  |
| 43 | 7.26  | 8.12 | 8.01 | 8.04 | 8.59  | 8.63  | 8.01 | 3.64 | 7.18  |
| 44 | 7.25  | 8.2  | 8.15 | 8.37 | 9.06  | 0.33  | 8.28 | 0.33 | 6.99  |
| 45 | 8.99  | 8.04 | 7.19 | 7.47 | 8.84  | 10.04 | 7.31 | 6.12 | 9.13  |
| 46 | 7.81  | 8.05 | 7.34 | 7.98 | 8.64  | 7.93  | 7.84 | 2.92 | 8.02  |
| 47 | 8.66  | 8.36 | 7.12 | 7.4  | 8.29  | 11.41 | 7.19 | 6.17 | 7.14  |
| 48 | 8.04  | 8.21 | 7.24 | 8.13 | 7.92  | 9.51  | 8.02 | 3.62 | 7.24  |
| 49 | 7.68  | 7.8  | 7.64 | 8.16 | 8.08  | 2.71  | 8.15 | 0.71 | 6.79  |
| 50 | 7.65  | 8.4  | 6.78 | 8.59 | 7.89  | 9.51  | 8.17 | 2.9  | 7.82  |
| 51 | 10.26 | 7.99 | 6.48 | 6.98 | 8.58  | 10.73 | 6.23 | 8.91 | 7.24  |
| 52 | 9.5   | 8.43 | 6.56 | 7.3  | 8.58  | 11.18 | 6.22 | 9.69 | 7.42  |
| 53 | 9.3   | 8.48 | 6.51 | 7.31 | 8.66  | 11.4  | 6.46 | 9.75 | 7.78  |

<https://mc.manuscriptcentral.com/gut>

1  
2  
3  
4  
5  
6  
7  
8  
9  
10  
11  
12  
13  
14  
15  
16  
17  
18  
19  
20  
21  
22  
23  
24  
25  
26  
27  
28  
29  
30  
31  
32  
33  
34  
35  
36  
37  
38  
39  
40  
41  
42  
43  
44  
45  
46  
47  
48  
49  
50  
51  
52  
53  
54  
55  
56  
57  
58  
59  
60

|       |       |      |      |       |       |      |      |       |
|-------|-------|------|------|-------|-------|------|------|-------|
| 9.72  | 8.48  | 6.55 | 7.49 | 8.32  | 11.1  | 6.79 | 9.58 | 7.78  |
| 10.49 | 9.03  | 7.19 | 7.43 | 9.84  | 12.69 | 6.35 | 8.67 | 9.06  |
| 10.26 | 8.67  | 6.95 | 7.71 | 9.82  | 13.03 | 6.73 | 8.76 | 8.77  |
| 10.56 | 8.41  | 6.1  | 7.5  | 9.91  | 11.68 | 6.57 | 8.29 | 8.07  |
| 10.32 | 8.48  | 6.14 | 7.48 | 9.95  | 11.64 | 6.54 | 8.38 | 8.7   |
| 9.44  | 9.4   | 6.87 | 8.05 | 9.66  | 12.58 | 7.12 | 7.53 | 8.01  |
| 9.46  | 9.43  | 6.33 | 7.53 | 10.59 | 13.24 | 5.43 | 8.15 | 8.82  |
| 9.61  | 8.94  | 5.89 | 7.67 | 9.93  | 12.5  | 5.07 | 8.09 | 8.36  |
| 9.54  | 10    | 6.93 | 7.6  | 10.29 | 13.82 | 5.74 | 8.13 | 9.76  |
| 14.9  | 9.89  | 6.83 | 8.32 | 9.39  | 13.57 | 6.52 | 9.38 | 9.33  |
| 12.39 | 9.87  | 6.78 | 8.22 | 9.77  | 13.19 | 6.05 | 9.2  | 9.06  |
| 12.09 | 9.94  | 6.38 | 8.25 | 9.92  | 13.22 | 5.71 | 9.52 | 9.39  |
| 13.25 | 9.91  | 6.65 | 8.22 | 9.71  | 13.14 | 6.06 | 9.22 | 9.11  |
| 9.6   | 8.47  | 6.02 | 7.21 | 8.96  | 12.2  | 6.15 | 7.88 | 8.12  |
| 10.3  | 9.02  | 5.64 | 7.23 | 9.09  | 12.57 | 4.83 | 8.4  | 8.38  |
| 9.14  | 9.21  | 6.77 | 7.34 | 9.11  | 13.25 | 6.25 | 7.16 | 9.53  |
| 9.03  | 9.05  | 7.14 | 7.49 | 9.75  | 13.35 | 4.08 | 8.44 | 8.31  |
| 9.8   | 8.81  | 6.22 | 7.9  | 9.55  | 12.89 | 4.57 | 9.18 | 8.04  |
| 9.55  | 9.35  | 7.19 | 8.03 | 9.44  | 13.26 | 4.1  | 8.43 | 8.77  |
| 10.02 | 8.94  | 6.3  | 7.58 | 9.7   | 12.55 | 5.21 | 8.18 | 8.19  |
| 10.94 | 8.68  | 6.04 | 8.03 | 9.42  | 12.52 | 4    | 8.68 | 6.1   |
| 10.85 | 8.82  | 5.41 | 7.93 | 9.07  | 11.37 | 3.06 | 8.77 | 5.39  |
| 10.5  | 8.81  | 7.04 | 7.5  | 9.3   | 12.54 | 6.06 | 8.13 | 8.09  |
| 11.16 | 9     | 6.63 | 7.51 | 9.7   | 12.3  | 6.29 | 8.07 | 7.72  |
| 10.7  | 10.09 | 7.15 | 7.61 | 10.25 | 14.1  | 5.15 | 7.79 | 10.38 |
| 8.9   | 7.53  | 5.89 | 6.01 | 8.7   | 12.03 | 2.95 | 8.1  | 8.03  |
| 9.91  | 7.43  | 5.31 | 6.38 | 8.09  | 11.91 | 5.25 | 8.23 | 7.38  |
| 10.03 | 7.2   | 5.16 | 6.01 | 8.01  | 11.39 | 5.26 | 8.15 | 7.46  |
| 9.09  | 7.11  | 5.22 | 6.22 | 8.63  | 12.1  | 4.48 | 8.34 | 7.68  |
| 6.4   | 6.93  | 6.51 | 7.34 | 7.82  | 6.51  | 7.15 | 1.76 | 6.8   |
| 7.16  | 7.04  | 6.74 | 7.08 | 8.13  | 9.61  | 6.95 | 4.3  | 6.79  |
| 6.13  | 7.09  | 6.82 | 6.95 | 7.92  | 0.88  | 7.44 | 0.88 | 6.99  |
| 6.57  | 6.86  | 6.71 | 7.45 | 8.12  | 7.13  | 7.28 | 2.54 | 6.68  |
| 8.19  | 7.54  | 5.9  | 6.71 | 8.06  | 10.87 | 5.68 | 6.6  | 6.24  |
| 7.76  | 7.51  | 6.28 | 7.02 | 7.57  | 10.37 | 6.05 | 6.35 | 6.51  |
| 7.72  | 7.73  | 6.41 | 7.07 | 7.54  | 10.98 | 5.94 | 6.03 | 6.65  |
| 8.03  | 7.82  | 6.32 | 6.8  | 7.69  | 11.9  | 5.72 | 5.84 | 7.26  |
| 8.57  | 9.01  | 6.35 | 7.38 | 10.1  | 13.57 | 3.35 | 8.24 | 5.11  |
| 10.01 | 8.94  | 5.27 | 6.51 | 9.25  | 12.13 | 5.63 | 7.94 | 7.59  |
| 11.02 | 8.09  | 5.28 | 7.38 | 9.74  | 12.24 | 4.33 | 8.45 | 8.87  |
| 10.36 | 8.89  | 6.14 | 7.19 | 11.08 | 13.73 | 5.93 | 7.23 | 9.95  |
| 10.47 | 8.42  | 6.23 | 7.93 | 9.39  | 11.85 | 5.44 | 8.45 | 7.54  |
| 9.97  | 8.68  | 6.51 | 6.83 | 10.85 | 13.73 | 4.51 | 6.83 | 9.97  |
| 9.14  | 8.84  | 6.31 | 7.49 | 9.32  | 12.85 | 4.62 | 8.24 | 6.75  |
| 9.42  | 9.35  | 6.84 | 7.71 | 9.34  | 13.02 | 4.52 | 8.36 | 7.54  |
| 10.66 | 9.26  | 2.68 | 5.89 | 9.52  | 9.79  | 4.38 | 8.27 | 4.59  |
| 9.72  | 9.4   | 6.05 | 6.8  | 9.4   | 12.38 | 5.71 | 7.84 | 8.87  |
| 10.4  | 9.04  | 5.36 | 6.58 | 9.24  | 11.89 | 4.28 | 8.22 | 8.17  |
| 9.54  | 9.01  | 6.16 | 6.84 | 9.02  | 11.97 | 6.19 | 7.6  | 8.49  |
| 9.15  | 7.69  | 6.11 | 6.57 | 8.74  | 12.13 | 3.89 | 7.3  | 7.39  |
| 8.79  | 7.79  | 5.81 | 6.97 | 7.91  | 11.58 | 5.28 | 7.11 | 6.64  |
| 8.86  | 7.5   | 5.94 | 6.75 | 8.06  | 11.52 | 5.69 | 7.17 | 6.68  |

<https://mc.manuscriptcentral.com/gut>

1  
2  
3  
4  
5  
6  
7  
8  
9  
10  
11  
12  
13  
14  
15  
16  
17  
18  
19  
20  
21  
22  
23  
24  
25  
26  
27  
28  
29  
30  
31  
32  
33  
34  
35  
36  
37  
38  
39  
40  
41  
42  
43  
44  
45  
46  
47  
48  
49  
50  
51  
52  
53  
54  
55  
56  
57  
58  
59  
60

|       |      |      |      |       |       |      |      |       |
|-------|------|------|------|-------|-------|------|------|-------|
| 9.3   | 8.31 | 6.15 | 7.27 | 8.51  | 12.09 | 4.25 | 7.57 | 8.26  |
| 9.69  | 8.8  | 6.05 | 6.23 | 10.04 | 12.32 | 5.1  | 7.31 | 6.27  |
| 9.61  | 7.75 | 5.44 | 6.63 | 10.06 | 10.82 | 4.59 | 7.52 | 5.49  |
| 9.14  | 7.46 | 4.74 | 6.51 | 10.1  | 10.92 | 4.74 | 7.53 | 5.35  |
| 7.2   | 7.55 | 6.68 | 6.91 | 9.48  | 10.44 | 6.2  | 2.55 | 7.17  |
| 10.74 | 7.62 | 6.36 | 6.62 | 8.9   | 12.39 | 3.57 | 8.16 | 8.29  |
| 9.76  | 7.18 | 4.35 | 6.68 | 8.85  | 10.58 | 3.65 | 7.96 | 7.26  |
| 9.82  | 7.22 | 4.11 | 6.73 | 8.97  | 10.55 | 2.52 | 7.74 | 6.86  |
| 6.48  | 7.45 | 7.04 | 7.5  | 8.01  | 1.86  | 7.77 | 0.27 | 6.11  |
| 8.32  | 7.89 | 6.95 | 7.22 | 8.43  | 11.1  | 6.67 | 6.66 | 6.65  |
| 9.23  | 8.58 | 6.11 | 7.08 | 9.35  | 12.85 | 4.11 | 8    | 5.38  |
| 8.94  | 8.62 | 6.28 | 7.25 | 8.39  | 12.17 | 5.35 | 8.04 | 6.72  |
| 9.24  | 8.86 | 6.16 | 7.12 | 9.05  | 12.59 | 4.3  | 8.31 | 7.41  |
| 8.91  | 9.1  | 6.63 | 7.16 | 8.53  | 12.86 | 5.34 | 7.83 | 8.03  |
| 10.44 | 8.43 | 6.63 | 6.71 | 11.23 | 13.6  | 4.87 | 7.07 | 10.69 |
| 8.91  | 8.24 | 4.84 | 6.86 | 9.86  | 11.83 | 4.89 | 7.99 | 9.01  |
| 8.72  | 7.56 | 5.59 | 7.2  | 9.13  | 11.41 | 5.82 | 7.39 | 8.01  |
| 8.91  | 8.33 | 5.11 | 6.93 | 10.04 | 11.9  | 4.45 | 7.81 | 9.26  |

1  
2  
3  
4  
5  
6  
7  
8  
9  
10  
11  
12  
13  
14  
15  
16  
17  
18  
19  
20  
21  
22  
23  
24  
25  
26  
27  
28  
29  
30  
31  
32  
33  
34  
35  
36  
37  
38  
39  
40  
41  
42  
43  
44  
45  
46  
47  
48  
49  
50  
51  
52  
53  
54  
55  
56  
57  
58  
59  
60

| VWA1 | VWA2 | WARS  | WIPF1 | WNT5A | WNT5B | WWTR1 | ZC3H12A | ZCCHC24 |
|------|------|-------|-------|-------|-------|-------|---------|---------|
| 6.13 | 6.05 | 8.77  | 8.7   | 7.41  | 6.9   | 8.9   | 8.14    | 6.49    |
| 6.01 | 6.68 | 8.62  | 7.85  | 8.36  | 6.69  | 8.57  | 8.91    | 6.69    |
| 5.97 | 6.21 | 8.59  | 7.94  | 8.8   | 7.03  | 8.66  | 8.84    | 6.61    |
| 5.7  | 6.29 | 8.79  | 7.87  | 8.82  | 5.7   | 9.83  | 8.49    | 8.49    |
| 5.92 | 7.56 | 7.89  | 8.1   | 8.67  | 8.95  | 8.92  | 8.1     | 2.59    |
| 5.37 | 6.67 | 9.17  | 8.31  | 8.43  | 7     | 8.84  | 7.65    | 6.27    |
| 5.7  | 6.5  | 9.14  | 8.42  | 8.61  | 6.81  | 8.75  | 8.12    | 5.92    |
| 5.2  | 6.42 | 10.42 | 8.68  | 8.43  | 5.04  | 9.39  | 7.89    | 7.78    |
| 5.12 | 2.37 | 9.18  | 8.6   | 7.15  | 6.15  | 8.87  | 7.79    | 7.97    |
| 5.34 | 5.74 | 8.24  | 7.53  | 7.71  | 7.04  | 8.42  | 9.43    | 6.34    |
| 4.08 | 3.96 | 8.7   | 7.66  | 7.41  | 6.59  | 8.84  | 9.24    | 7.29    |
| 5.21 | 1.68 | 8.64  | 8.15  | 7.06  | 5.73  | 9.39  | 9.62    | 8.24    |
| 5.12 | 7.21 | 8.29  | 7.54  | 7.42  | 7.04  | 7.81  | 7.79    | 6.39    |
| 6.01 | 7.44 | 8.83  | 8.04  | 8.31  | 7.35  | 8.16  | 8.2     | 7       |
| 6.35 | 7.52 | 9.96  | 8.78  | 5.58  | 6.41  | 9.45  | 7.23    | 9.59    |
| 5.8  | 6.26 | 8.74  | 8.66  | 7.34  | 7.05  | 8.54  | 9.87    | 7.71    |
| 5.38 | 7.2  | 8.94  | 8.31  | 8.9   | 6.99  | 9.66  | 9.38    | 7.92    |
| 6.25 | 6.49 | 8.41  | 8.3   | 8.43  | 7.66  | 9.48  | 9.13    | 8.04    |
| 5.98 | 1.48 | 10.21 | 10.2  | 5.65  | 5.25  | 9.39  | 7.45    | 8.25    |
| 6.02 | 3.95 | 10.55 | 9.4   | 7.69  | 5.4   | 9.17  | 8.69    | 7.46    |
| 6.41 | 1.82 | 10.7  | 9.99  | 5.52  | 5.38  | 9.72  | 7.64    | 8.4     |
| 5.06 | 7.52 | 8.94  | 8.28  | 10.05 | 7.29  | 9.84  | 7.03    | 8.47    |
| 4.78 | 7.73 | 8.89  | 7.96  | 9.93  | 7.42  | 9.39  | 7.57    | 8.14    |
| 5.06 | 7.97 | 8.83  | 8.43  | 9.06  | 6.96  | 10.3  | 7.35    | 8.76    |
| 4.23 | 2.43 | 9.78  | 7.93  | 6.13  | 5.33  | 7.47  | 6.31    | 7.07    |
| 4.77 | 5.52 | 9.94  | 6.9   | 7.84  | 4.71  | 7.29  | 9.69    | 5.91    |
| 4.43 | 6.56 | 9.37  | 7.03  | 7.85  | 4.43  | 7.33  | 9.04    | 5.81    |
| 5.44 | 6.75 | 9.35  | 7.79  | 7.49  | 6.6   | 7.81  | 9.39    | 6       |
| 6.22 | 7.35 | 7.95  | 7.52  | 6.48  | 7.16  | 7.92  | 8.07    | 6.17    |
| 6.89 | 7.44 | 8.06  | 7.91  | 7.13  | 7.14  | 8.81  | 8.44    | 7.06    |
| 6.62 | 7.9  | 8.09  | 7.21  | 7.23  | 7.2   | 8.58  | 8.05    | 6.72    |
| 7.05 | 7.72 | 8.11  | 8.17  | 7.26  | 7.5   | 8.58  | 8.38    | 7.2     |
| 4.96 | 6.03 | 8.79  | 9.79  | 7.32  | 7.46  | 8.01  | 7.73    | 6.18    |
| 5.67 | 4.23 | 8.91  | 8.75  | 8.87  | 5.84  | 10.15 | 8.57    | 8.7     |
| 5.54 | 5.17 | 9.01  | 8.33  | 9.66  | 5.95  | 9.13  | 8.61    | 7.69    |
| 5.11 | 4.28 | 8.81  | 8.76  | 8.32  | 5.72  | 10    | 8.12    | 8.88    |
| 3.77 | 0.45 | 12.08 | 9.53  | 5.35  | 5.49  | 8.1   | 6.69    | 6.6     |
| 3.86 | 3.65 | 12.56 | 8.96  | 7.65  | 6.19  | 7.77  | 7.79    | 6.33    |
| 4.37 | 2.95 | 12.54 | 9.48  | 6.89  | 5.54  | 7.96  | 6.79    | 7.17    |
| 3.65 | 2.07 | 12.11 | 9.67  | 5.27  | 5.53  | 8.11  | 6.64    | 6.99    |
| 5.68 | 6.36 | 7.75  | 7.97  | 7.17  | 7     | 8.88  | 7.78    | 5.82    |
| 5.36 | 6.57 | 7.47  | 7.33  | 8.31  | 7.01  | 8.8   | 7.94    | 5.96    |
| 5.61 | 6.48 | 7.63  | 7.43  | 7.63  | 6.74  | 8.85  | 7.7     | 5.68    |
| 4.46 | 6.4  | 7.98  | 7.49  | 8     | 6.85  | 9.45  | 7.91    | 5.7     |
| 3.86 | 6.03 | 8.38  | 6.45  | 4.86  | 5.45  | 8.74  | 4.45    | 7.56    |
| 4.02 | 6.31 | 8.11  | 7.73  | 7.51  | 5.74  | 8.61  | 7.03    | 6.9     |
| 5.39 | 5.78 | 8.41  | 7.64  | 8.18  | 5.55  | 8.99  | 6.91    | 7       |
| 3.71 | 4.39 | 8.11  | 8.15  | 8.06  | 5.45  | 9.78  | 6.6     | 7.79    |
| 4.33 | 6.13 | 10.57 | 9.06  | 6.09  | 4.96  | 9.85  | 7.63    | 7.96    |
| 4.59 | 5.94 | 11.03 | 8.63  | 8.43  | 5.18  | 10.54 | 8.16    | 7.43    |
| 4.74 | 6.33 | 10.82 | 8.68  | 8.37  | 5.02  | 10.02 | 8.42    | 6.92    |

<https://mc.manuscriptcentral.com/gut>

|    |      |      |       |      |      |       |       |      |      |
|----|------|------|-------|------|------|-------|-------|------|------|
| 1  |      |      |       |      |      |       |       |      |      |
| 2  | 4.89 | 4.99 | 11.6  | 9.06 | 7.55 | 4.78  | 10.39 | 7.92 | 8.11 |
| 3  | 6.22 | 7.32 | 8.05  | 7.51 | 6.59 | 7.14  | 7.83  | 8.14 | 6.37 |
| 4  | 6.7  | 6.38 | 8.75  | 7.64 | 8.21 | 7.84  | 8.52  | 9.05 | 5.92 |
| 5  | 6.41 | 6.9  | 8.95  | 7.55 | 8.11 | 7.5   | 8.52  | 8.36 | 6.2  |
| 6  | 6.12 | 6.38 | 8.88  | 7.86 | 6.9  | 7.81  | 9     | 8.31 | 7.08 |
| 7  | 4.87 | 4.23 | 8.62  | 9.04 | 6.18 | 7.6   | 8.38  | 7.45 | 6.78 |
| 8  | 5.33 | 2.57 | 9.02  | 7.78 | 8.37 | 7.43  | 9.14  | 7.9  | 7.05 |
| 9  | 3.65 | 2.46 | 8.68  | 6.39 | 7.47 | 7.28  | 7.76  | 7.64 | 6.14 |
| 10 | 4.76 | 2.02 | 8.55  | 7.84 | 7.73 | 7.71  | 9.5   | 7.48 | 8.23 |
| 11 | 6.99 | 3.58 | 9.56  | 7.92 | 5.96 | 5.28  | 7.4   | 7.72 | 6.45 |
| 12 | 5.93 | 7.19 | 9.65  | 8.03 | 8.75 | 5.07  | 8.11  | 8.52 | 7.37 |
| 13 | 6.71 | 6.96 | 9.7   | 7.36 | 8.53 | 5.06  | 7.58  | 8.43 | 6.82 |
| 14 | 5.79 | 5.3  | 9.74  | 7.83 | 8.03 | 4.93  | 8.77  | 7.69 | 7.84 |
| 15 | 6.74 | 6.74 | 9.4   | 7.74 | 8.15 | 9.24  | 10.82 | 6.15 | 7.47 |
| 16 | 5.96 | 6.43 | 11.29 | 8.45 | 8.84 | 8.54  | 8.58  | 7.26 | 7.04 |
| 17 | 5.92 | 7.13 | 10.6  | 8.63 | 8.24 | 8.56  | 8.22  | 8.07 | 6.2  |
| 18 | 7.2  | 8.81 | 9.24  | 8.81 | 9.78 | 10.07 | 9.89  | 8.39 | 0.24 |
| 19 | 7.31 | 8.2  | 9.21  | 8.41 | 9.24 | 9.61  | 9.35  | 8.19 | 1.77 |
| 20 | 5.72 | 5.63 | 9.16  | 6.72 | 7.72 | 6.37  | 6.93  | 8.62 | 4.05 |
| 21 | 5.67 | 5.9  | 9.17  | 6.88 | 7.35 | 6.64  | 6.7   | 9.09 | 3.78 |
| 22 | 6.2  | 5.82 | 9.36  | 7.62 | 7.51 | 6.89  | 7.47  | 8.61 | 5.34 |
| 23 | 5    | 4.56 | 8.5   | 8.16 | 8.24 | 5.97  | 9.57  | 7.94 | 7.94 |
| 24 | 4.86 | 5.19 | 8.34  | 7.72 | 7.89 | 6.49  | 9.47  | 8.09 | 7.7  |
| 25 | 5.3  | 7.12 | 8.12  | 7.49 | 7.74 | 7.44  | 9.3   | 7.39 | 7.71 |
| 26 | 5.59 | 7.53 | 10.31 | 9.1  | 7.86 | 7.14  | 8.92  | 8.71 | 7.65 |
| 27 | 6.38 | 7.89 | 10.25 | 8.87 | 8.68 | 7.13  | 9.33  | 8.36 | 7.76 |
| 28 | 6.6  | 7.42 | 10.67 | 8.99 | 7.9  | 7.05  | 9.64  | 8.11 | 8.49 |
| 29 | 5.94 | 7    | 10.16 | 8.18 | 8.34 | 6.59  | 8.48  | 8.49 | 6.49 |
| 30 | 5.89 | 7.2  | 10.08 | 7.94 | 7.8  | 6.11  | 8.79  | 8.09 | 7.06 |
| 31 | 5.85 | 7.12 | 10    | 8.22 | 7.37 | 6.77  | 8.91  | 7.99 | 7.13 |
| 32 | 6.29 | 8.34 | 8.47  | 8.24 | 7.52 | 7.4   | 8.88  | 8.83 | 7.42 |
| 33 | 6.31 | 8.34 | 8.89  | 8.01 | 7.4  | 7.12  | 8.12  | 8.45 | 6.87 |
| 34 | 6.2  | 8.52 | 8.54  | 8.05 | 8.2  | 7.31  | 7.92  | 8.52 | 6.2  |
| 35 | 5.92 | 7.25 | 8.58  | 8.15 | 7.98 | 7.42  | 9.58  | 8.32 | 7.09 |
| 36 | 6.01 | 7.19 | 8.8   | 8.14 | 8.75 | 7.21  | 9.21  | 8.55 | 6.58 |
| 37 | 5.9  | 7.04 | 8.57  | 8.12 | 8.27 | 7.59  | 9.68  | 8.54 | 7.46 |
| 38 | 6.02 | 6.7  | 8.39  | 8.83 | 7.64 | 7.39  | 8.94  | 8.75 | 7.26 |
| 39 | 6.02 | 6.7  | 8.39  | 8.83 | 7.64 | 7.39  | 8.94  | 8.75 | 7.26 |
| 40 | 5.15 | 7.26 | 8.64  | 8.24 | 8.41 | 6.82  | 9.34  | 9.2  | 7.43 |
| 41 | 5.79 | 7.11 | 8.53  | 8.55 | 8    | 7.21  | 9.82  | 9.04 | 8.15 |
| 42 | 5.64 | 7.23 | 8.43  | 8.49 | 8.23 | 7.27  | 9.8   | 8.53 | 8.41 |
| 43 | 5.98 | 7.05 | 8.38  | 8.9  | 7.96 | 7.64  | 9.12  | 8.53 | 6.14 |
| 44 | 6.3  | 7.12 | 8.91  | 8.22 | 8.71 | 7.48  | 9.35  | 9.2  | 7.44 |
| 45 | 5.59 | 6.55 | 8.56  | 7.74 | 8.31 | 6.5   | 9.09  | 8.86 | 6.7  |
| 46 | 6.17 | 7.2  | 8.59  | 8.29 | 7.96 | 7.44  | 9.71  | 8.33 | 7.98 |
| 47 | 4.43 | 6.84 | 8.79  | 8.02 | 7.86 | 4.81  | 9.36  | 9.16 | 7.64 |
| 48 | 5.25 | 7.7  | 8.4   | 6.83 | 7.49 | 5.03  | 8.73  | 8.71 | 6.52 |
| 49 | 5.32 | 7.04 | 8.87  | 8.79 | 7.31 | 3.98  | 9.1   | 8.97 | 8.14 |
| 50 | 5.83 | 6.84 | 8.06  | 8.67 | 7.55 | 7.29  | 8.11  | 8.24 | 6.34 |
| 51 | 6.14 | 7.17 | 8.12  | 8.35 | 8.13 | 7.29  | 9.88  | 8.31 | 8.55 |
| 52 | 5.63 | 7.01 | 7.91  | 8.42 | 8.02 | 7.39  | 9.95  | 8.05 | 8.79 |
| 53 | 5.53 | 7.15 | 9     | 7.77 | 8.48 | 7.85  | 9.46  | 8.33 | 7.03 |

1  
2  
3  
4  
5  
6  
7  
8  
9  
10  
11  
12  
13  
14  
15  
16  
17  
18  
19  
20  
21  
22  
23  
24  
25  
26  
27  
28  
29  
30  
31  
32  
33  
34  
35  
36  
37  
38  
39  
40  
41  
42  
43  
44  
45  
46  
47  
48  
49  
50  
51  
52  
53  
54  
55  
56  
57  
58  
59  
60

|      |      |       |      |       |      |       |      |      |
|------|------|-------|------|-------|------|-------|------|------|
| 5.56 | 6.82 | 8.98  | 7.78 | 8.78  | 8.08 | 9.76  | 8.47 | 6.96 |
| 6.57 | 7.42 | 8.78  | 7.87 | 8.73  | 7.89 | 9.61  | 8.02 | 7.83 |
| 4.42 | 6.67 | 8.59  | 9.48 | 7.23  | 6.83 | 9.12  | 7.6  | 7.77 |
| 4.6  | 7    | 8.65  | 8.6  | 10.29 | 7.16 | 9.97  | 8.08 | 8.43 |
| 4.19 | 7.3  | 8.69  | 8.82 | 9.9   | 6.87 | 10.52 | 7.36 | 9.34 |
| 5.21 | 2.41 | 10.97 | 9.55 | 6.58  | 6.83 | 9.85  | 8.22 | 8.27 |
| 4.5  | 6.83 | 9.22  | 7.5  | 8.74  | 6.42 | 9.03  | 8.89 | 6.81 |
| 4.51 | 6.52 | 9.72  | 7.81 | 8.82  | 6.64 | 9.52  | 8.23 | 6.99 |
| 6.74 | 6.82 | 10.87 | 8.72 | 7.92  | 6.95 | 11.17 | 8.05 | 9.32 |
| 4.6  | 5.84 | 8.79  | 8.47 | 6.08  | 4.38 | 9.14  | 7.41 | 7.53 |
| 4.81 | 6.3  | 9.38  | 7.87 | 7.64  | 7.15 | 9.44  | 8.08 | 6.35 |
| 4.89 | 6.14 | 8.88  | 7.58 | 7.44  | 7.51 | 8.71  | 8.16 | 5.41 |
| 6.07 | 6.17 | 9.61  | 8.39 | 7.88  | 7.26 | 10.01 | 7.99 | 8.78 |
| 7.38 | 8.2  | 9.08  | 9.16 | 8.6   | 9.67 | 9.23  | 9.32 | 2.01 |
| 5.08 | 6.16 | 8.55  | 6.56 | 8.41  | 7.24 | 8.34  | 7.29 | 6.37 |
| 5.23 | 5.59 | 8.68  | 6.21 | 8.16  | 7.22 | 8.1   | 7.58 | 6.34 |
| 4.98 | 6.26 | 8.37  | 6.67 | 6.84  | 7.23 | 8.78  | 7.01 | 6.97 |
| 5.41 | 2.89 | 12.33 | 9.27 | 8.1   | 5.48 | 7.94  | 8.49 | 6.58 |
| 5.18 | 5.37 | 11.77 | 8.74 | 8.02  | 6.77 | 8     | 7.72 | 6.88 |
| 5.07 | 4.68 | 12.2  | 8.97 | 7.33  | 6.02 | 8.1   | 8.19 | 7.03 |
| 6.16 | 5.16 | 7.97  | 7.49 | 5.16  | 8.33 | 9.49  | 7.16 | 7.16 |
| 5.16 | 3.78 | 8.24  | 7.9  | 8.34  | 6.04 | 9.13  | 9.61 | 5.4  |
| 5.24 | 4.86 | 9.05  | 8.8  | 7.7   | 6.62 | 9.48  | 9    | 6.74 |
| 5.64 | 6.39 | 8.24  | 7.72 | 8.44  | 6.09 | 10.39 | 6.64 | 8.49 |
| 6.08 | 6.88 | 8.68  | 7.74 | 8.18  | 5.08 | 10.33 | 6.46 | 8.87 |
| 5.24 | 4.71 | 8.36  | 8.24 | 7.03  | 5.19 | 10.24 | 7.03 | 9.25 |
| 6.97 | 7.64 | 7.96  | 8.04 | 8.05  | 8.22 | 8.52  | 8.72 | 4.46 |
| 6.69 | 7.52 | 8.28  | 8.04 | 8.09  | 8.44 | 8.49  | 8.87 | 0.86 |
| 6.23 | 7.44 | 8.45  | 8.05 | 8.03  | 8.21 | 7.6   | 8.4  | 4.35 |
| 3.82 | 4.33 | 7.48  | 7.63 | 5.65  | 3.82 | 8.54  | 7.04 | 7.62 |
| 4.64 | 4.05 | 6.93  | 7.96 | 8.3   | 3.98 | 9.87  | 6.33 | 8.86 |
| 4.57 | 4.92 | 7.94  | 7.26 | 7.93  | 5.39 | 9.12  | 7    | 8.16 |
| 4.33 | 3.86 | 7.41  | 8.13 | 6.66  | 3.33 | 9.73  | 7.38 | 8.8  |
| 5.94 | 6.93 | 7.92  | 7.45 | 7.21  | 7.36 | 7.39  | 7.59 | 4.62 |
| 5.42 | 6.46 | 7.84  | 7.11 | 6.87  | 6.81 | 7.5   | 7.85 | 3.57 |
| 5.51 | 6.49 | 8.49  | 7    | 6.74  | 6.63 | 7.56  | 7.67 | 4.55 |
| 5.78 | 7.38 | 8.06  | 7.49 | 8.15  | 8    | 8.66  | 7.79 | 0.32 |
| 6.34 | 6.86 | 7.48  | 7.34 | 7.31  | 7.34 | 7.01  | 8.28 | 4.51 |
| 5.85 | 6.49 | 7.4   | 7.21 | 7.57  | 7.29 | 7.23  | 7.89 | 3.68 |
| 5.67 | 6.7  | 7.44  | 7.28 | 7.42  | 7.3  | 7.1   | 7.95 | 3.89 |
| 3.41 | 6    | 6.8   | 6.73 | 9.57  | 7.46 | 9.01  | 5    | 2.41 |
| 7.01 | 7.61 | 8.25  | 8.43 | 8.34  | 8.24 | 8.25  | 9.13 | 3.64 |
| 7.3  | 7.88 | 8.64  | 8.44 | 8.5   | 8.67 | 8.42  | 9.29 | 0.33 |
| 6.33 | 6.54 | 10.25 | 7.76 | 7.62  | 7.64 | 7.76  | 8.24 | 5.04 |
| 6.6  | 7.74 | 8.81  | 7.92 | 8.21  | 8.19 | 8.22  | 8.59 | 4.14 |
| 6.3  | 7.35 | 7.73  | 7.91 | 7.55  | 7.57 | 8.52  | 8.17 | 6.39 |
| 7.19 | 7.83 | 7.82  | 8.09 | 7.72  | 8.2  | 8.51  | 8.98 | 4.94 |
| 6.97 | 7.85 | 7.99  | 8.17 | 7.95  | 8.38 | 8.52  | 8.85 | 2.29 |
| 6.61 | 8.02 | 8.27  | 7.79 | 8.42  | 8.79 | 8.81  | 8.64 | 5.39 |
| 5.4  | 6.67 | 8.18  | 7.36 | 6.76  | 7.22 | 8.31  | 6.81 | 5.69 |
| 5.39 | 6.64 | 8.23  | 7.85 | 7.28  | 6.96 | 8.37  | 7.63 | 5.42 |
| 6.12 | 6.56 | 8.38  | 7.81 | 7.17  | 7.03 | 8.4   | 7.58 | 5.25 |

<https://mc.manuscriptcentral.com/gut>



|    |      |      |       |       |      |      |       |       |       |
|----|------|------|-------|-------|------|------|-------|-------|-------|
| 1  |      |      |       |       |      |      |       |       |       |
| 2  | 6.46 | 6.34 | 8.02  | 7.96  | 6.85 | 7.01 | 8.43  | 7.67  | 5.22  |
| 3  | 7.23 | 7.61 | 9.29  | 8.48  | 6.74 | 6.8  | 8.84  | 9.08  | 6.73  |
| 4  | 7.13 | 7.53 | 9.27  | 8.32  | 8.28 | 7.11 | 8.94  | 9.02  | 7.37  |
| 5  | 6.85 | 7.81 | 8.8   | 7.75  | 7.01 | 7.3  | 8.14  | 8.95  | 5.2   |
| 6  | 6.82 | 7.76 | 9.05  | 7.92  | 7.37 | 7.39 | 8.05  | 9.06  | 5.58  |
| 7  | 5.38 | 6.61 | 9.36  | 9.24  | 7.65 | 7.62 | 9.19  | 8.46  | 7.6   |
| 8  | 5.37 | 5.16 | 9.9   | 9.03  | 8.37 | 6.93 | 9.45  | 9.12  | 8.58  |
| 9  | 5.11 | 4.79 | 9.95  | 8.7   | 8.12 | 6.59 | 8.84  | 9.5   | 7.91  |
| 10 | 5.74 | 4.33 | 10.27 | 9.57  | 6.67 | 6.87 | 10.48 | 7.83  | 10.08 |
| 11 | 5.89 | 8.3  | 10.11 | 8.06  | 8.12 | 6.93 | 9.72  | 9.61  | 8.17  |
| 12 | 5.41 | 7.47 | 10.07 | 8.63  | 8.55 | 6.81 | 10.18 | 8.22  | 8.42  |
| 13 | 4.63 | 7.82 | 10.31 | 8.74  | 9.68 | 6.91 | 10.01 | 8.98  | 8.29  |
| 14 | 5.74 | 7.78 | 9.82  | 8.22  | 7.89 | 6.95 | 10.16 | 8.02  | 8.42  |
| 15 | 4.97 | 5.78 | 8.33  | 8.29  | 6.44 | 6.73 | 8.38  | 9.88  | 7.06  |
| 16 | 4.87 | 4.9  | 9.06  | 7.94  | 8.09 | 6.33 | 9.5   | 10.59 | 7.29  |
| 17 | 6.3  | 5.79 | 8.51  | 8.59  | 7.08 | 6.59 | 10.17 | 8.37  | 9.33  |
| 18 | 4.52 | 1.58 | 9.6   | 9.61  | 6.39 | 5.85 | 9.09  | 7.23  | 8.22  |
| 19 | 4.47 | 5.84 | 9.15  | 8.11  | 8.76 | 6.6  | 9.4   | 7.74  | 7.86  |
| 20 | 5.73 | 4.52 | 9.59  | 9.05  | 8.07 | 6.04 | 10.32 | 7.3   | 9.05  |
| 21 | 3.39 | 1.93 | 9.4   | 8.39  | 5.39 | 5.39 | 8.4   | 7.26  | 7.49  |
| 22 | 4.13 | 6.82 | 8.79  | 8.04  | 9.7  | 6.14 | 8.28  | 8.51  | 7.5   |
| 23 | 3.73 | 7.6  | 8.15  | 7.41  | 8.2  | 8.01 | 7.56  | 7.93  | 6.08  |
| 24 | 6.06 | 7.21 | 8.85  | 8.45  | 9.43 | 7.33 | 9.17  | 8.78  | 7.68  |
| 25 | 5.93 | 7.37 | 8.97  | 8.21  | 9.46 | 6.97 | 9.12  | 9.17  | 7.47  |
| 26 | 6.74 | 7.47 | 8.4   | 8.24  | 8.19 | 6.61 | 10.79 | 7.32  | 10.36 |
| 27 | 3.53 | 4.89 | 8.71  | 8.77  | 4.06 | 5.41 | 7.54  | 5.06  | 5.98  |
| 28 | 3.6  | 5.84 | 8.95  | 7.91  | 7.39 | 6.41 | 8.23  | 6.22  | 6.57  |
| 29 | 3.76 | 5.01 | 9.03  | 7.33  | 7.54 | 6.58 | 7.84  | 6.53  | 5.65  |
| 30 | 1.9  | 4.9  | 8.54  | 8.03  | 7.6  | 6.54 | 9.42  | 5.71  | 8.13  |
| 31 | 6.01 | 6.8  | 7.57  | 6.97  | 7.37 | 7.12 | 7.18  | 7.87  | 1.76  |
| 32 | 5.97 | 6.45 | 7.21  | 6.76  | 7.53 | 6.83 | 7.08  | 7.81  | 3.89  |
| 33 | 6.17 | 6.99 | 7.38  | 7.09  | 7.38 | 7.53 | 7.34  | 7.91  | 0.88  |
| 34 | 6.24 | 6.63 | 7.66  | 7.04  | 7.46 | 7.31 | 7.38  | 7.98  | 3.28  |
| 35 | 5.29 | 5.17 | 7.38  | 7.41  | 6.33 | 5.99 | 7.27  | 8.26  | 5     |
| 36 | 5.57 | 5.87 | 8.07  | 7.07  | 6.72 | 6.3  | 7.77  | 7.75  | 5.39  |
| 37 | 5.96 | 5.92 | 7.17  | 7.07  | 7.09 | 6.29 | 8.12  | 7.62  | 5.88  |
| 38 | 5.38 | 5.84 | 7.24  | 7.4   | 6.59 | 6.13 | 8.33  | 7.8   | 6.86  |
| 39 | 4.16 | 2.68 | 8.34  | 10.17 | 6.38 | 5.48 | 7.33  | 7.92  | 6.8   |
| 40 | 5.85 | 7.44 | 8.61  | 8.06  | 8.24 | 6.05 | 8.9   | 7.84  | 7.61  |
| 41 | 4.33 | 4.33 | 11.75 | 8.84  | 7.96 | 5.63 | 7.97  | 8.47  | 6.99  |
| 42 | 6.04 | 5.04 | 11.67 | 9.39  | 7.36 | 6.14 | 8.34  | 7.36  | 8.69  |
| 43 | 5.47 | 5.43 | 8.04  | 8.12  | 6.42 | 6.6  | 8.21  | 7.77  | 7.16  |
| 44 | 6.83 | 5.51 | 11.83 | 9.51  | 7.51 | 6.51 | 8.9   | 7.32  | 9.27  |
| 45 | 4.68 | 5.62 | 9.01  | 8.13  | 7.97 | 5.89 | 9.03  | 8.01  | 8.02  |
| 46 | 5.22 | 5.36 | 8.31  | 8.41  | 7.41 | 5.18 | 9.55  | 7.77  | 8.36  |
| 47 | 4.27 | 6.95 | 7.68  | 5.49  | 4.68 | 2.27 | 8.5   | 8.54  | 5.68  |
| 48 | 5.31 | 6.05 | 9.1   | 8     | 7.06 | 5.96 | 9.11  | 8.02  | 7.55  |
| 49 | 5.13 | 6.28 | 8.77  | 7.83  | 6.77 | 4.92 | 8.81  | 7.98  | 7.21  |
| 50 | 5.68 | 6.01 | 8.84  | 8.17  | 6.67 | 6.19 | 8.93  | 7.8   | 6.8   |
| 51 | 6.9  | 6.06 | 7.67  | 8.26  | 5.46 | 5.33 | 7.95  | 6.89  | 6.98  |
| 52 | 6.46 | 6.72 | 7.31  | 7.47  | 7.14 | 6.02 | 8.44  | 7.14  | 6.76  |
| 53 | 6.54 | 6.78 | 7.46  | 7.54  | 6.95 | 6.31 | 8.48  | 7.2   | 6.45  |

|      |      |      |      |      |      |      |      |      |
|------|------|------|------|------|------|------|------|------|
| 6.9  | 7.31 | 7.02 | 7.46 | 5.37 | 5.83 | 9.11 | 5.74 | 8.45 |
| 5.8  | 5.96 | 7.68 | 6.53 | 5.27 | 5.85 | 9.12 | 6.19 | 7.58 |
| 7.03 | 6.93 | 7.8  | 6.39 | 8    | 5.76 | 8.1  | 6.65 | 6.69 |
| 6.9  | 7.33 | 7.94 | 6.16 | 8.29 | 5.7  | 8.22 | 6.53 | 6.29 |
| 6.98 | 6.76 | 8.09 | 7.88 | 7.41 | 7.53 | 8.15 | 7.82 | 6.55 |
| 2.73 | 4.73 | 8.61 | 7.55 | 6.06 | 5.06 | 7.51 | 7.08 | 5.89 |
| 2.39 | 5.97 | 9.07 | 6.98 | 5.24 | 5.59 | 6.86 | 6.01 | 4.82 |
| 2.81 | 6.33 | 9.11 | 6.88 | 5.26 | 5.13 | 6.84 | 6.43 | 4.6  |
| 6.34 | 7.14 | 8.03 | 8.21 | 7.53 | 7.86 | 7.58 | 8.71 | 1.27 |
| 5.41 | 6.7  | 7.84 | 7.82 | 7.54 | 6.97 | 8.35 | 8.02 | 6.65 |
| 3.82 | 4.51 | 8.22 | 8.73 | 7    | 5.01 | 8.39 | 6.87 | 7.67 |
| 5.21 | 6.28 | 8.15 | 7.92 | 7.59 | 6.38 | 9.22 | 7.12 | 7.66 |
| 4.76 | 6.93 | 8.49 | 8.15 | 7.47 | 5.69 | 9.15 | 6.59 | 8.29 |
| 4.59 | 4.77 | 8.1  | 8.4  | 7.3  | 5.83 | 9.36 | 6.74 | 8.22 |
| 4.87 | 6.13 | 8.47 | 6.63 | 6.45 | 5.87 | 9.1  | 7.13 | 8.07 |
| 3.61 | 5.29 | 9.28 | 8.28 | 6.53 | 6.18 | 7.58 | 6.39 | 6.63 |
| 4.4  | 6.36 | 8.65 | 7.89 | 7.46 | 6.7  | 7.62 | 7.53 | 6.14 |
| 3.75 | 4.88 | 9.37 | 8.34 | 6.4  | 6    | 7.57 | 6.62 | 6.56 |

1  
2  
3  
4  
5  
6  
7  
8  
9  
10  
11  
12  
13  
14  
15  
16  
17  
18  
19  
20  
21  
22  
23  
24  
25  
26  
27  
28  
29  
30  
31  
32  
33  
34  
35  
36  
37  
38  
39  
40  
41  
42  
43  
44  
45  
46  
47  
48  
49  
50  
51  
52  
53  
54  
55  
56  
57  
58  
59  
60

| ZEB1 | ZEB2 | ZFPM2 | ZFYVE16 | ZFYVE9 | AGK  | AMMECR1L | CC2D1B | CNOT10 |
|------|------|-------|---------|--------|------|----------|--------|--------|
| 7.72 | 6.16 | 5.65  | 7.26    | 7.37   | 7.15 | 7.97     | 7      | 7.12   |
| 7.8  | 6.36 | 5.33  | 7.38    | 7.19   | 6.95 | 8.02     | 6.55   | 7.05   |
| 7.64 | 5.99 | 4.78  | 7.38    | 7.48   | 6.81 | 7.86     | 6.84   | 7.18   |
| 8.5  | 7.4  | 4.35  | 7.68    | 7.58   | 6.25 | 7.77     | 5.31   | 6.52   |
| 8.64 | 1.01 | 7.05  | 7.74    | 7.87   | 8.56 | 9.03     | 7.97   | 8.32   |
| 7.88 | 5.9  | 5.4   | 7.43    | 6.62   | 7.13 | 7.97     | 6.09   | 7.54   |
| 7.81 | 6.58 | 5.31  | 7.59    | 6.85   | 6.96 | 7.81     | 6.46   | 7.57   |
| 8    | 6.95 | 3.2   | 7.07    | 6.58   | 5.98 | 7.44     | 4.64   | 7.19   |
| 7.39 | 7.54 | 3.69  | 7.44    | 6.39   | 6.5  | 7.35     | 4.07   | 7.33   |
| 7.34 | 5.86 | 4.37  | 7.2     | 6.93   | 6.93 | 7.77     | 6.14   | 7.13   |
| 7.48 | 7.02 | 2.96  | 7.62    | 7.08   | 6.75 | 7.65     | 4.38   | 6.95   |
| 8.21 | 7.46 | 4.14  | 8.09    | 7.11   | 6.46 | 7.79     | 4.14   | 7.35   |
| 7.57 | 5.86 | 5.45  | 7.76    | 7.44   | 7.48 | 7.99     | 6.53   | 8.15   |
| 7.93 | 6.63 | 6.03  | 7.95    | 7.42   | 7.59 | 8.16     | 6.64   | 7.73   |
| 8.81 | 7.29 | 1.77  | 7.16    | 7.38   | 6.77 | 7.81     | 6.16   | 6.72   |
| 8.19 | 6.9  | 5.85  | 7.57    | 7.45   | 7.28 | 8.06     | 6.94   | 7.71   |
| 8.49 | 6.65 | 6.24  | 7.54    | 7.36   | 7.42 | 8.43     | 7.12   | 7.24   |
| 8.63 | 6.72 | 6.64  | 7.6     | 7.69   | 7.32 | 8.31     | 7.12   | 7.24   |
| 8.24 | 8.08 | 3.36  | 7.5     | 6.79   | 6.58 | 7.64     | 5.87   | 7.73   |
| 8.23 | 7.54 | 3.01  | 8.15    | 7.58   | 5.99 | 7.77     | 4.83   | 7.75   |
| 8.98 | 8.05 | 4.02  | 8.13    | 7.35   | 6.6  | 7.71     | 5.25   | 7.87   |
| 8.79 | 7.29 | 4.32  | 8.17    | 8.04   | 7.06 | 8.03     | 5.1    | 7.5    |
| 8.6  | 7.47 | 3.78  | 8.07    | 8.33   | 7.01 | 8.17     | 4.84   | 7.39   |
| 9.28 | 7.38 | 4.7   | 7.99    | 8.24   | 7.04 | 8.03     | 5.54   | 7.43   |
| 6.98 | 6.47 | 3.43  | 7.81    | 7.99   | 6.82 | 7.78     | 3.89   | 7.75   |
| 6.73 | 5.96 | 2.94  | 7.39    | 8.01   | 6.06 | 7.94     | 5.04   | 7.6    |
| 6.71 | 5.65 | 3.69  | 7.28    | 8.02   | 6.04 | 7.79     | 5.11   | 7.68   |
| 7.42 | 5.94 | 4.72  | 7.45    | 7.88   | 6.88 | 7.9      | 6.75   | 7.59   |
| 7.13 | 5.87 | 5.19  | 6.87    | 7.63   | 6.83 | 7.9      | 6.67   | 7.6    |
| 7.87 | 6.37 | 4.98  | 7.49    | 7.48   | 6.58 | 8.06     | 6.85   | 7.43   |
| 7.44 | 5.52 | 4.9   | 6.75    | 7.83   | 6.94 | 7.86     | 6.62   | 7.59   |
| 7.99 | 6.49 | 5.92  | 7.34    | 7.76   | 7.1  | 8.06     | 7.55   | 7.7    |
| 8.2  | 7.42 | 5.52  | 7.99    | 6.78   | 7.61 | 8.09     | 6.69   | 7.2    |
| 8.86 | 7.58 | 4.23  | 8.02    | 7.44   | 6.77 | 8.09     | 4.31   | 7.32   |
| 7.97 | 6.75 | 2.93  | 7.91    | 7.06   | 6.66 | 7.94     | 4.37   | 7.36   |
| 8.86 | 7.1  | 4.17  | 7.79    | 7.41   | 6.11 | 8.03     | 3.93   | 7.28   |
| 7.21 | 7.09 | 3.25  | 6.94    | 5.84   | 6.03 | 6.67     | 5.3    | 6.82   |
| 7.38 | 6.68 | 1.99  | 7.21    | 6.13   | 5.71 | 6.85     | 4.4    | 7.1    |
| 7.78 | 6.94 | 3.17  | 7.19    | 6.43   | 6.12 | 7.21     | 5.61   | 6.76   |
| 7.9  | 7.13 | 2.74  | 7.34    | 6.08   | 6.07 | 6.7      | 4.91   | 7.07   |
| 7.38 | 6.04 | 5.51  | 7.09    | 6.94   | 6.87 | 7.85     | 6.81   | 7.09   |
| 7.72 | 5.32 | 5.57  | 6.77    | 7.29   | 6.92 | 8.05     | 6.57   | 7.14   |
| 7.15 | 4.97 | 5.95  | 6.64    | 6.83   | 6.96 | 8.01     | 6.52   | 7.05   |
| 7.22 | 5.14 | 5.24  | 6.47    | 6.69   | 6.85 | 7.67     | 5.67   | 6.77   |
| 6.45 | 6.45 | 2.86  | 6.18    | 6.86   | 5.18 | 6.18     | 4.45   | 5.86   |
| 7.51 | 6.77 | 2.31  | 6.96    | 7.2    | 6.31 | 7.31     | 4.48   | 6.82   |
| 7.89 | 6.93 | 3.32  | 7.32    | 7.43   | 6.54 | 7.21     | 3.58   | 6.69   |
| 8.72 | 7.23 | 3.39  | 7.66    | 7.21   | 6.09 | 7.23     | 4.56   | 6.7    |
| 7.59 | 7.58 | 4.54  | 8.04    | 7.69   | 7.43 | 8.17     | 6.03   | 7.47   |
| 7.99 | 7.37 | 3.71  | 8.1     | 7.67   | 7.79 | 7.99     | 5.26   | 7.65   |
| 7.84 | 7.12 | 3.3   | 8.33    | 7.69   | 7.57 | 8.16     | 5.78   | 7.67   |

<https://mc.manuscriptcentral.com/gut>

1  
2  
3  
4  
5  
6  
7  
8  
9  
10  
11  
12  
13  
14  
15  
16  
17  
18  
19  
20  
21  
22  
23  
24  
25  
26  
27  
28  
29  
30  
31  
32  
33  
34  
35  
36  
37  
38  
39  
40  
41  
42  
43  
44  
45  
46  
47  
48  
49  
50  
51  
52  
53  
54  
55  
56  
57  
58  
59  
60

|      |      |      |      |      |      |       |      |      |
|------|------|------|------|------|------|-------|------|------|
| 8.29 | 7.45 | 3.99 | 8.43 | 7.42 | 7.89 | 8.07  | 5.12 | 7.63 |
| 7.33 | 5.91 | 5.62 | 7.76 | 7.77 | 7.92 | 8.75  | 6.41 | 8.46 |
| 7.76 | 5.89 | 5.74 | 7.86 | 7.87 | 7.89 | 8.89  | 6.68 | 7.91 |
| 7.35 | 6    | 5.84 | 7.76 | 7.67 | 7.89 | 8.87  | 6.45 | 7.94 |
| 8.22 | 6.1  | 6.25 | 7.6  | 7.78 | 7.89 | 8.86  | 6.76 | 8.03 |
| 7.53 | 7.5  | 4.81 | 7.58 | 7.31 | 7.41 | 8.25  | 5.59 | 7.53 |
| 7.57 | 6.98 | 2.83 | 7.78 | 7.61 | 7.69 | 8.33  | 5    | 7.29 |
| 6.31 | 5.65 | 2.17 | 7.33 | 7.61 | 7.36 | 8.02  | 4.25 | 7.87 |
| 8.19 | 6.69 | 3.76 | 7.49 | 7.95 | 7.52 | 8.23  | 4.44 | 7.56 |
| 6.91 | 6.03 | 3.75 | 8.31 | 7.13 | 6.64 | 7.61  | 5.11 | 7.7  |
| 7.41 | 6.54 | 1.54 | 8.17 | 7.2  | 6.81 | 7.55  | 5    | 7.57 |
| 7.02 | 5.75 | 2.82 | 8.06 | 7.2  | 6.99 | 7.63  | 4.77 | 7.64 |
| 7.97 | 6.19 | 3.15 | 7.94 | 7.46 | 6.86 | 7.4   | 4.84 | 7.48 |
| 8.15 | 6.74 | 6.74 | 7.74 | 7.15 | 7.96 | 10.36 | 5.15 | 6.74 |
| 8.44 | 6.18 | 7.42 | 8.16 | 6.85 | 7.91 | 8.61  | 7.2  | 7.68 |
| 8.15 | 6.08 | 6.68 | 7.69 | 7.58 | 7.97 | 8.28  | 7.04 | 8.02 |
| 9.85 | 0.24 | 8.14 | 9.07 | 7.71 | 9.3  | 10.09 | 8.94 | 8.54 |
| 9.34 | 1.77 | 7.93 | 8.77 | 7.81 | 9.15 | 9.88  | 8.58 | 8.17 |
| 7.08 | 5.05 | 4.84 | 7.78 | 7.96 | 6.16 | 8.05  | 6.37 | 7.91 |
| 6.95 | 4.26 | 5.21 | 7.76 | 7.91 | 6.56 | 8.16  | 6.54 | 7.94 |
| 7.29 | 5.65 | 5.67 | 7.72 | 7.9  | 6.78 | 8.14  | 6.75 | 7.9  |
| 7.96 | 7.24 | 4.18 | 8.26 | 7.85 | 7.49 | 7.94  | 5.16 | 7.71 |
| 8.18 | 7.06 | 4.37 | 8.03 | 7.89 | 7.44 | 7.92  | 5.8  | 7.65 |
| 8.58 | 6.6  | 6    | 8.35 | 7.72 | 7.75 | 8.42  | 6.96 | 7.46 |
| 7.65 | 6.92 | 3.22 | 8.35 | 7.72 | 7.21 | 8.38  | 5.34 | 8.18 |
| 8.27 | 6.68 | 4.5  | 8.55 | 7.45 | 7.65 | 8.73  | 4.63 | 8.07 |
| 8.36 | 7.1  | 5.39 | 8.41 | 7.62 | 7.43 | 8.64  | 4.15 | 8.07 |
| 7.62 | 6.19 | 5.57 | 8.4  | 8.24 | 7.95 | 8.42  | 6.97 | 7.81 |
| 7.81 | 6.13 | 5.44 | 8.6  | 8.23 | 7.82 | 8.41  | 6.81 | 7.53 |
| 8.08 | 6.11 | 5.58 | 8.3  | 8.28 | 7.8  | 8.59  | 7.21 | 7.6  |
| 7.96 | 7.16 | 5.9  | 8.55 | 7.92 | 7.98 | 9.11  | 7.36 | 8.08 |
| 7.83 | 6.33 | 5.81 | 8.38 | 7.96 | 8.06 | 8.92  | 7.08 | 7.91 |
| 7.64 | 5.63 | 5.69 | 8.31 | 7.73 | 8.14 | 9.13  | 7.41 | 8.05 |
| 8.34 | 6.37 | 6.19 | 7.91 | 7.67 | 7.21 | 8.37  | 7.26 | 7.8  |
| 8    | 6.03 | 5.97 | 7.89 | 7.71 | 7.44 | 8.27  | 7.17 | 7.77 |
| 8.37 | 6.68 | 6.19 | 8.18 | 7.72 | 7.47 | 8.37  | 6.99 | 7.96 |
| 8.11 | 6.7  | 6.08 | 7.93 | 7.37 | 7.66 | 8.39  | 7.55 | 7.65 |
| 8.11 | 6.7  | 6.08 | 7.93 | 7.37 | 7.66 | 8.39  | 7.55 | 7.65 |
| 8.43 | 5.79 | 6.75 | 7.49 | 7.2  | 7.44 | 8.35  | 7.22 | 7.62 |
| 8.91 | 6.24 | 6.01 | 7.72 | 7.59 | 7.75 | 8.67  | 7.29 | 7.44 |
| 8.9  | 6.77 | 6.37 | 7.96 | 7.59 | 7.66 | 8.46  | 7.04 | 7.61 |
| 7.72 | 5.8  | 6.17 | 7.76 | 7.83 | 7.99 | 8.54  | 7.69 | 7.89 |
| 7.96 | 6.82 | 5.85 | 7.82 | 7.72 | 7.68 | 8.42  | 7.44 | 7.72 |
| 7.57 | 6.39 | 5.34 | 7.66 | 7.79 | 7.37 | 8.29  | 6.97 | 7.36 |
| 8.47 | 6.13 | 6.17 | 7.74 | 7.87 | 7.8  | 8.43  | 7.7  | 7.76 |
| 7.88 | 6.63 | 3.53 | 7.86 | 7.27 | 5.84 | 7.36  | 4.53 | 7.92 |
| 7.05 | 5.72 | 2.4  | 7.35 | 7.8  | 5.98 | 7.36  | 4.83 | 7.73 |
| 8.03 | 7.31 | 4.22 | 7.82 | 7.06 | 6.01 | 7.32  | 4.91 | 7.54 |
| 7.74 | 6.44 | 6.24 | 7.61 | 7.65 | 7.66 | 8.29  | 7.65 | 7.75 |
| 8.92 | 7.06 | 6.06 | 7.78 | 7.61 | 7.54 | 8.48  | 7.22 | 7.77 |
| 8.94 | 6.65 | 6.01 | 7.75 | 7.81 | 7.86 | 8.27  | 7.47 | 7.76 |
| 7.77 | 5.72 | 5.72 | 7.01 | 7.95 | 7.61 | 8.15  | 7.45 | 8.18 |

<https://mc.manuscriptcentral.com/gut>

|    |       |      |      |      |      |      |      |      |      |
|----|-------|------|------|------|------|------|------|------|------|
| 1  |       |      |      |      |      |      |      |      |      |
| 2  | 7.92  | 5.8  | 5.53 | 7    | 7.48 | 7.73 | 8.06 | 7.05 | 7.65 |
| 3  | 8.7   | 5.36 | 6.96 | 7.4  | 8.01 | 8.28 | 8.6  | 7.57 | 8.34 |
| 4  | 8.04  | 7.74 | 4.57 | 7.78 | 7.21 | 7.05 | 7.81 | 5.87 | 7.3  |
| 5  | 8.58  | 7.64 | 4.4  | 8    | 7.9  | 7.09 | 7.96 | 5.66 | 7.2  |
| 6  | 9.19  | 8.16 | 5.74 | 8.16 | 7.95 | 6.93 | 8.35 | 5.81 | 7.26 |
| 7  | 7.97  | 7.44 | 3.41 | 6.75 | 6.16 | 6.29 | 7.13 | 5.16 | 6.91 |
| 8  | 7.37  | 6.43 | 3.87 | 7.55 | 7.59 | 7.04 | 7.38 | 4.45 | 7.59 |
| 9  | 7.61  | 6.63 | 2.93 | 7.58 | 6.61 | 7.23 | 7.6  | 3.46 | 7.62 |
| 10 | 8.85  | 7.54 | 3.49 | 7.14 | 5.66 | 6.58 | 7.2  | 5.08 | 7.3  |
| 11 | 7.15  | 7.3  | 4.79 | 7.45 | 7.27 | 6.72 | 7.63 | 4.38 | 7.15 |
| 12 | 7.01  | 5.81 | 3.95 | 6.98 | 7.4  | 6.62 | 7.86 | 3.49 | 7.16 |
| 13 | 7.31  | 4.59 | 5.28 | 6.98 | 7.37 | 7.44 | 8.05 | 6.75 | 7.02 |
| 14 | 8.75  | 6.07 | 3.26 | 6.26 | 7.3  | 6.96 | 7.72 | 4.58 | 6.85 |
| 15 | 10.27 | 0.79 | 7.83 | 7.42 | 8.6  | 8.35 | 9.97 | 8.83 | 8.36 |
| 16 | 7.54  | 5.85 | 2.95 | 7.03 | 6.52 | 6.96 | 8.17 | 4.41 | 7.71 |
| 17 | 6.83  | 5.36 | 3    | 7.18 | 6.87 | 6.91 | 8.07 | 3    | 7.74 |
| 18 | 7.59  | 5.52 | 3.69 | 6.97 | 6.55 | 6.8  | 8.16 | 4.33 | 7.54 |
| 19 | 7.54  | 7.07 | 3.14 | 8.38 | 6.8  | 7.03 | 7.51 | 4.08 | 7.35 |
| 20 | 7.98  | 6.38 | 5.03 | 7.73 | 6.95 | 7.46 | 7.77 | 6.17 | 6.99 |
| 21 | 8.08  | 7.1  | 4.3  | 8.09 | 6.56 | 7.27 | 7.64 | 5.52 | 7.18 |
| 22 | 5.16  | 5.16 | 6.16 | 7.16 | 6.75 | 6.75 | 7.75 | 7.97 | 5.16 |
| 23 | 6.45  | 5.49 | 2.94 | 7.01 | 7.37 | 8.33 | 7.31 | 4.56 | 6.5  |
| 24 | 7.16  | 6.6  | 3.34 | 7.26 | 7.15 | 7.97 | 7.24 | 4.44 | 6.96 |
| 25 | 8.42  | 6.47 | 3.77 | 6.5  | 7.47 | 6.22 | 7.67 | 5.27 | 7.09 |
| 26 | 8.58  | 6.84 | 3.71 | 6.33 | 7.15 | 6.37 | 7.38 | 5.61 | 6.91 |
| 27 | 8.55  | 7.47 | 4.93 | 7.35 | 7.4  | 5.93 | 7.77 | 5.07 | 6.83 |
| 28 | 7.99  | 3    | 6.58 | 7.67 | 8.04 | 7.72 | 8.79 | 8.23 | 8.08 |
| 29 | 8.05  | 0.86 | 6.95 | 7.7  | 8.28 | 8.06 | 8.74 | 8.5  | 8.04 |
| 30 | 8.16  | 1.77 | 6.63 | 7.7  | 8.18 | 7.74 | 8.44 | 8.44 | 8.19 |
| 31 | 7.29  | 6.99 | 4.65 | 6.97 | 6.08 | 6.28 | 6.84 | 4.4  | 6.24 |
| 32 | 8.65  | 7.02 | 4.5  | 7.35 | 6.79 | 5.93 | 6.51 | 4.64 | 6.16 |
| 33 | 8.19  | 6.41 | 3.28 | 6.57 | 6.55 | 6.2  | 6.84 | 4.5  | 5.97 |
| 34 | 8.29  | 7.39 | 5.24 | 7.44 | 6.6  | 6.11 | 6.73 | 4.24 | 6.48 |
| 35 | 7.11  | 1.45 | 6.21 | 6.64 | 7.04 | 7.27 | 7.97 | 7.31 | 7.57 |
| 36 | 7.11  | 1.25 | 5.78 | 6.68 | 6.98 | 7.3  | 7.96 | 7.39 | 6.92 |
| 37 | 6.8   | 2.51 | 5.77 | 6.73 | 6.99 | 7.01 | 7.88 | 6.85 | 6.46 |
| 38 | 7.96  | 0    | 7.32 | 7.92 | 6.87 | 8.15 | 8.83 | 7.48 | 7.26 |
| 39 | 7.17  | 1.34 | 6.14 | 7.04 | 7.31 | 7.51 | 8.3  | 7.68 | 7.01 |
| 40 | 7.25  | 1.1  | 5.56 | 6.38 | 7.23 | 7.52 | 8.3  | 7.47 | 7.18 |
| 41 | 7.22  | 3.48 | 6.04 | 6.91 | 7.48 | 7.41 | 8.1  | 7.58 | 7.19 |
| 42 | 8.14  | 2.41 | 8.37 | 9.04 | 4    | 8.34 | 9.71 | 6.41 | 7.46 |
| 43 | 7.99  | 3.86 | 6.3  | 7.64 | 8.24 | 8.24 | 9.07 | 8.46 | 8.09 |
| 44 | 8.6   | 0.91 | 7.17 | 8.07 | 8.54 | 8.48 | 9.29 | 8.85 | 8.56 |
| 45 | 7.45  | 3.87 | 5.73 | 7.13 | 7.74 | 7.24 | 7.83 | 7.57 | 7.76 |
| 46 | 7.89  | 1.75 | 6.9  | 7.64 | 8    | 7.99 | 8.96 | 8.01 | 7.96 |
| 47 | 7.98  | 5.16 | 6.17 | 7.21 | 7.58 | 7.58 | 8.36 | 7.58 | 7.54 |
| 48 | 8.28  | 2.3  | 6.91 | 7.43 | 8.21 | 7.76 | 9.06 | 8.24 | 7.51 |
| 49 | 8.08  | 0.71 | 6.94 | 7.71 | 8.41 | 8.23 | 9.25 | 8.75 | 7.84 |
| 50 | 8.39  | 2.9  | 7.79 | 8.32 | 7.93 | 8.66 | 9.11 | 7.87 | 8.1  |
| 51 | 6.87  | 5.67 | 6.27 | 7.51 | 7.41 | 7.26 | 8.21 | 6.6  | 7.35 |
| 52 | 6.9   | 5.83 | 5.91 | 7.49 | 7.24 | 7.11 | 8.68 | 6.34 | 7.49 |
| 53 | 7.13  | 5.5  | 5.92 | 7.55 | 7.35 | 7.25 | 8.74 | 6.53 | 7.54 |

<https://mc.manuscriptcentral.com/gut>

1  
2  
3  
4  
5  
6  
7  
8  
9  
10  
11  
12  
13  
14  
15  
16  
17  
18  
19  
20  
21  
22  
23  
24  
25  
26  
27  
28  
29  
30  
31  
32  
33  
34  
35  
36  
37  
38  
39  
40  
41  
42  
43  
44  
45  
46  
47  
48  
49  
50  
51  
52  
53  
54  
55  
56  
57  
58  
59  
60

|       |      |      |      |      |      |      |      |      |
|-------|------|------|------|------|------|------|------|------|
| 6.91  | 5.94 | 5.94 | 7.52 | 7.38 | 7.27 | 8.87 | 6.52 | 7.56 |
| 8.2   | 6.84 | 5.94 | 8.45 | 7.72 | 7.52 | 8.43 | 6.74 | 8.12 |
| 8.28  | 6.88 | 5.46 | 8.49 | 7.91 | 7.63 | 8.17 | 6.88 | 8.1  |
| 7.64  | 5.44 | 4.74 | 8.28 | 7.95 | 7.61 | 8.46 | 7.2  | 8.01 |
| 7.55  | 6.19 | 5.06 | 8.1  | 8.01 | 7.62 | 8.34 | 6.94 | 8.2  |
| 8.54  | 6.85 | 5.87 | 8.54 | 7.68 | 7.81 | 8.71 | 7.1  | 7.79 |
| 8.28  | 7.92 | 4.01 | 7.94 | 8.65 | 7.15 | 8.39 | 6.05 | 7.62 |
| 7.88  | 7.23 | 3.68 | 8.47 | 8.6  | 6.95 | 8.35 | 5.68 | 7.68 |
| 9.79  | 8.34 | 5.27 | 7.88 | 8.87 | 6.91 | 8.3  | 6.72 | 7.37 |
| 8.43  | 7.71 | 5.09 | 8.2  | 7.58 | 7.35 | 8.39 | 6.19 | 7.17 |
| 8.93  | 7.7  | 4.25 | 8.18 | 7.58 | 7.9  | 8.54 | 6.59 | 7.43 |
| 8.77  | 7.4  | 4.55 | 8.38 | 7.82 | 7.93 | 8.6  | 6.34 | 7.29 |
| 8.83  | 7.16 | 4.52 | 8.2  | 7.51 | 7.78 | 8.38 | 6.15 | 7.49 |
| 7.09  | 6.77 | 4.87 | 7.39 | 7.51 | 7.18 | 7.55 | 6.35 | 7.3  |
| 7.24  | 6.86 | 3.21 | 7.77 | 7.54 | 7.09 | 7.09 | 4.79 | 7.31 |
| 9.13  | 6.77 | 5.6  | 7.25 | 7.48 | 7.27 | 7.65 | 6.7  | 7.42 |
| 8.38  | 8.02 | 4.24 | 8.03 | 6.97 | 6.76 | 7.43 | 5.2  | 7.47 |
| 8.12  | 6.88 | 3.25 | 7.95 | 7.57 | 7.21 | 7.75 | 4.84 | 7.42 |
| 9.46  | 7.4  | 4.43 | 8.29 | 7.13 | 6.54 | 7.74 | 4.52 | 7.45 |
| 6.94  | 6.93 | 4.02 | 7.65 | 7.03 | 6.59 | 7.66 | 5.21 | 7.27 |
| 7.38  | 6.36 | 4.13 | 8.29 | 6.88 | 7.15 | 8.34 | 3.79 | 7.74 |
| 6.6   | 5.48 | 2.8  | 8.16 | 6.85 | 6.43 | 8.34 | 3.48 | 7.38 |
| 8.3   | 6.83 | 4.81 | 6.99 | 7.64 | 7.17 | 7.5  | 7.06 | 7.5  |
| 8.28  | 6.54 | 5.1  | 7.23 | 7.56 | 7.14 | 7.39 | 6.84 | 7.53 |
| 10.62 | 7.4  | 6.74 | 6.61 | 7.06 | 6.47 | 7.47 | 5.47 | 6.96 |
| 6.22  | 6.59 | 2.68 | 7.1  | 6.06 | 6.14 | 6.45 | 2.95 | 6.36 |
| 6.79  | 6.41 | 3.6  | 7.36 | 6.46 | 6.15 | 6.86 | 4.11 | 6.08 |
| 6.39  | 5.49 | 2.09 | 7.29 | 6.33 | 6.6  | 6.85 | 4.09 | 6.3  |
| 8.84  | 4.48 | 2.9  | 8.44 | 5.81 | 5.9  | 6.65 | 1.9  | 7.26 |
| 7.01  | 1.76 | 5.76 | 6.66 | 7.64 | 6.89 | 7.85 | 7.43 | 7.34 |
| 6.79  | 3.3  | 6.33 | 6.42 | 7.09 | 6.99 | 7.43 | 7.43 | 7.06 |
| 7.15  | 0.88 | 5.93 | 6.91 | 7.51 | 7.42 | 7.96 | 7.42 | 7.34 |
| 6.6   | 0.96 | 6    | 6.63 | 7.09 | 7.07 | 7.88 | 7.68 | 7.43 |
| 6.23  | 5.47 | 3.82 | 6.35 | 6.28 | 6.19 | 6.59 | 6.13 | 6.54 |
| 6.82  | 5.42 | 4.66 | 6.8  | 6.6  | 6.32 | 7.21 | 6.4  | 6.73 |
| 7.3   | 5.44 | 4.52 | 6.82 | 6.77 | 6.35 | 7.19 | 6.76 | 6.67 |
| 7.34  | 6.12 | 4.92 | 6.8  | 6.54 | 6.29 | 7.07 | 6.22 | 6.67 |
| 8.3   | 7.57 | 3.94 | 7.45 | 5.81 | 6.8  | 6.92 | 5.81 | 7.28 |
| 8.06  | 6.37 | 3.46 | 7.61 | 6.85 | 6.63 | 7.8  | 4.92 | 7.59 |
| 7.19  | 6.85 | 3.74 | 7.49 | 7    | 5.91 | 7.26 | 4.59 | 7.62 |
| 7.91  | 6.55 | 3.82 | 6.48 | 6.63 | 5.82 | 7.69 | 5.69 | 7.48 |
| 7.21  | 6.15 | 5.02 | 7.42 | 7.42 | 6.43 | 8.15 | 6.35 | 7.64 |
| 8.21  | 5.51 | 5.51 | 7.1  | 7.32 | 4.51 | 8.21 | 6.51 | 6.51 |
| 7.71  | 7.1  | 3.33 | 7.54 | 7.6  | 7.04 | 7.92 | 4.45 | 7.45 |
| 8.87  | 7.05 | 4.26 | 7.48 | 7.08 | 7.23 | 7.9  | 4.58 | 7.64 |
| 4.27  | 4.59 | 2.68 | 6.99 | 8.47 | 7.25 | 8.27 | 4.27 | 7.44 |
| 7.84  | 6.34 | 5.03 | 7.09 | 7.84 | 6.95 | 8.11 | 6.01 | 6.96 |
| 7.08  | 6.47 | 1.28 | 7.07 | 8.15 | 7.06 | 8.28 | 4.8  | 7.37 |
| 7.64  | 6.54 | 4.34 | 7.29 | 8.06 | 7.46 | 8.31 | 6.34 | 7.31 |
| 6.92  | 6.79 | 3.48 | 7.24 | 6.14 | 6.06 | 6.53 | 3.74 | 6.13 |
| 7.96  | 6.23 | 4.53 | 7.16 | 6.72 | 6.02 | 6.94 | 5.62 | 6.34 |
| 7.71  | 6.39 | 4.69 | 7.19 | 6.56 | 6.29 | 7.11 | 5.79 | 6.33 |

<https://mc.manuscriptcentral.com/gut>

1  
2  
3  
4  
5  
6  
7  
8  
9  
10  
11  
12  
13  
14  
15  
16  
17  
18  
19  
20  
21  
22  
23  
24  
25  
26  
27  
28  
29  
30  
31  
32  
33  
34  
35  
36  
37  
38  
39  
40  
41  
42  
43  
44  
45  
46  
47  
48  
49  
50  
51  
52  
53  
54  
55  
56  
57  
58  
59  
60

|      |      |      |      |      |      |      |      |      |
|------|------|------|------|------|------|------|------|------|
| 9.08 | 6.18 | 3.96 | 7    | 6.43 | 5.92 | 6.31 | 4.11 | 6.18 |
| 6.91 | 7.01 | 4.8  | 6.39 | 5.74 | 6.53 | 7.23 | 5.56 | 7.05 |
| 7.29 | 5.05 | 3.76 | 6.34 | 6.61 | 6.08 | 7.16 | 5.29 | 7.47 |
| 7.23 | 5.53 | 3.66 | 6.53 | 6.86 | 5.29 | 6.57 | 5.39 | 7.53 |
| 8.01 | 3.14 | 5.36 | 6.31 | 7.55 | 6.64 | 7.64 | 8.01 | 7.7  |
| 6.73 | 6.65 | 2.15 | 7.19 | 6.18 | 6.64 | 7.27 | 2.89 | 6.68 |
| 5.07 | 5.41 | 2.65 | 6.77 | 5.85 | 6.53 | 7    | 3.39 | 6.88 |
| 5.26 | 5.31 | 2.35 | 6.69 | 6.07 | 6.65 | 7.11 | 2.94 | 6.91 |
| 7.93 | 0.27 | 6.27 | 7.14 | 7.49 | 7.74 | 8.59 | 7.92 | 7.61 |
| 7.66 | 6.06 | 5.86 | 7.24 | 7.28 | 7.3  | 7.94 | 6.99 | 7.32 |
| 7.5  | 7.43 | 4.24 | 6.93 | 6.46 | 5.99 | 7.14 | 4.9  | 6.54 |
| 8.23 | 6.21 | 4.8  | 7.32 | 7.16 | 6.17 | 7.12 | 5.64 | 6.32 |
| 8.53 | 7.08 | 3.89 | 6.81 | 7.26 | 6.03 | 7.12 | 4.83 | 6.69 |
| 8.45 | 7.21 | 5.37 | 7.16 | 7.01 | 6.48 | 7.41 | 5.52 | 6.76 |
| 6.94 | 5.13 | 5.71 | 4.54 | 6.94 | 6.24 | 7.3  | 5.35 | 6.24 |
| 6.86 | 5.87 | 4.97 | 6.67 | 6.12 | 6.67 | 7.2  | 4.93 | 6.66 |
| 6.99 | 5.98 | 5.36 | 6.97 | 6.89 | 7.04 | 7.54 | 5.69 | 6.89 |
| 6.66 | 6.21 | 3.84 | 6.71 | 6.11 | 6.65 | 7.06 | 4.34 | 6.72 |

|    | CNOT4 | COG7 | DDX50 | DHX16 | DNAJC14 | EDC3 | EIF2B4 | ERCC3 | FCF1  |
|----|-------|------|-------|-------|---------|------|--------|-------|-------|
| 1  |       |      |       |       |         |      |        |       |       |
| 2  |       |      |       |       |         |      |        |       |       |
| 3  | 7.18  | 7.95 | 8.52  | 6.59  | 6.25    | 7.09 | 7.52   | 6.29  | 10.23 |
| 4  | 7.37  | 8.03 | 8.18  | 6.71  | 6.36    | 7.31 | 7.74   | 6.58  | 10.08 |
| 5  | 7.18  | 8.02 | 8.16  | 6.98  | 6.06    | 7.09 | 7.7    | 6.53  | 10.12 |
| 6  | 7.35  | 8.31 | 7.91  | 7.7   | 6.39    | 7.95 | 7.86   | 7.35  | 10.04 |
| 7  | 7.68  | 8.56 | 9.54  | 5.47  | 6.82    | 1.01 | 8.03   | 6.99  | 11.86 |
| 8  | 7.18  | 8.13 | 8.18  | 7.29  | 6.11    | 7.4  | 7.35   | 6.18  | 10.38 |
| 9  | 7.2   | 8.18 | 8.22  | 7.07  | 6.01    | 7.44 | 7.36   | 6.19  | 10.27 |
| 10 | 7.1   | 8.52 | 7.92  | 8.31  | 7.01    | 8.02 | 7.43   | 7.58  | 9.92  |
| 11 | 7.66  | 8.41 | 7.93  | 8.05  | 5.95    | 8.05 | 7.94   | 7.17  | 9.97  |
| 12 | 7.56  | 8.08 | 8.17  | 7.42  | 5.49    | 7.25 | 7.68   | 6.69  | 9.93  |
| 13 | 7.65  | 8.08 | 7.99  | 7.89  | 6.19    | 8.02 | 7.99   | 6.75  | 9.79  |
| 14 | 7.9   | 8.21 | 7.98  | 7.76  | 5.89    | 8.02 | 8      | 6.93  | 9.89  |
| 15 | 7.49  | 8.24 | 8.59  | 7.72  | 6.14    | 7.68 | 8.27   | 6.64  | 10.82 |
| 16 | 7.62  | 8.18 | 8.83  | 7.18  | 6.54    | 7.81 | 8.37   | 6.74  | 10.65 |
| 17 | 7.79  | 8.54 | 8.89  | 8.41  | 7.72    | 8.05 | 8.72   | 8.79  | 10.63 |
| 18 | 7.59  | 7.93 | 8.96  | 7.7   | 6.99    | 7.56 | 8.26   | 7.25  | 10.24 |
| 19 | 7.57  | 8.24 | 8.98  | 7.66  | 6.29    | 7.83 | 8.41   | 6.61  | 10.47 |
| 20 | 7.98  | 8.15 | 8.75  | 7.89  | 6.99    | 7.8  | 8.08   | 7.42  | 10.66 |
| 21 | 8.19  | 8.59 | 8.42  | 8.34  | 6.54    | 8.56 | 8.18   | 8.06  | 10.39 |
| 22 | 8.4   | 8.32 | 8.38  | 8.05  | 6.34    | 8.62 | 8.32   | 7.09  | 10.09 |
| 23 | 8.39  | 8.3  | 8.61  | 7.98  | 6.28    | 8.6  | 8.15   | 7.36  | 10.13 |
| 24 | 8.22  | 8.57 | 8.6   | 7.9   | 6.58    | 8.18 | 9.13   | 7.4   | 10.15 |
| 25 | 8.12  | 8.3  | 8.76  | 7.99  | 6.61    | 8.2  | 9.03   | 7.4   | 10.21 |
| 26 | 8.21  | 8.6  | 8.64  | 7.82  | 6.39    | 8.17 | 9.02   | 7.27  | 10.02 |
| 27 | 7.65  | 7.56 | 8.4   | 7.62  | 7.08    | 8.84 | 8.9    | 7.21  | 10.28 |
| 28 | 7.38  | 8.28 | 8.04  | 8.19  | 6.79    | 8.45 | 8.69   | 7.01  | 9.8   |
| 29 | 7.25  | 8.47 | 8.29  | 8.13  | 6.65    | 8.45 | 8.53   | 6.82  | 9.9   |
| 30 | 7.47  | 8.11 | 8.54  | 7.42  | 6.68    | 8    | 8.18   | 6.47  | 10.17 |
| 31 | 7.37  | 8.62 | 8.79  | 7.45  | 6.5     | 7.47 | 7.89   | 6.75  | 10.6  |
| 32 | 7.43  | 8.24 | 8.71  | 7.58  | 6.26    | 7.25 | 7.99   | 6.78  | 10.43 |
| 33 | 7.48  | 8.55 | 8.66  | 7.73  | 6.62    | 7.47 | 7.97   | 6.37  | 10.61 |
| 34 | 7.41  | 8.44 | 8.81  | 7.48  | 6.32    | 7.08 | 7.89   | 6.8   | 10.87 |
| 35 | 8.03  | 7.83 | 8.34  | 6.92  | 6.29    | 7.4  | 7.81   | 7.02  | 10.63 |
| 36 | 7.67  | 8.49 | 8.43  | 8.12  | 6.1     | 8.23 | 8.16   | 7.35  | 10.43 |
| 37 | 7.46  | 8.45 | 8.42  | 8.34  | 6.09    | 8.2  | 8.09   | 7.39  | 10.46 |
| 38 | 7.85  | 8.69 | 8.45  | 8.44  | 6.38    | 8.26 | 8.12   | 7.5   | 10.37 |
| 39 | 6.55  | 7.46 | 7.12  | 7.63  | 6.33    | 7.3  | 7.81   | 7.1   | 9.37  |
| 40 | 7.14  | 7.39 | 7.52  | 7.44  | 6.29    | 6.83 | 7.69   | 6.74  | 9.42  |
| 41 | 7.17  | 7.31 | 7.72  | 7.31  | 6.17    | 6.78 | 7.89   | 6.58  | 9.41  |
| 42 | 7.26  | 7.36 | 7.66  | 7.19  | 5.95    | 7.11 | 7.34   | 6.46  | 9.42  |
| 43 | 7.1   | 7.53 | 8.2   | 6.47  | 5.62    | 6.47 | 7.23   | 6.35  | 10.19 |
| 44 | 7.15  | 7.32 | 8.44  | 6.13  | 6.03    | 6.53 | 7.32   | 5.8   | 10.5  |
| 45 | 6.82  | 7.26 | 8.39  | 6.41  | 5.89    | 6.33 | 7.26   | 5.95  | 10.42 |
| 46 | 7.09  | 7.36 | 7.96  | 6.82  | 5.57    | 6.87 | 7.19   | 6.22  | 10.17 |
| 47 | 6.03  | 7.99 | 8.03  | 8.86  | 8.45    | 7.95 | 7.25   | 8.29  | 10.55 |
| 48 | 7.53  | 8.16 | 7.85  | 7.8   | 5.81    | 8.01 | 7.83   | 6.02  | 9.64  |
| 49 | 7.27  | 7.89 | 7.86  | 7.73  | 5.73    | 7.97 | 7.75   | 6.55  | 9.62  |
| 50 | 7.68  | 7.91 | 7.97  | 7.71  | 5.51    | 7.87 | 7.76   | 6.47  | 9.53  |
| 51 | 8.14  | 8.25 | 8.24  | 8.46  | 6.99    | 8.58 | 8.75   | 7.61  | 10.25 |
| 52 | 8.19  | 8.2  | 8.56  | 8.13  | 7.08    | 8.49 | 8.64   | 7.12  | 10.28 |
| 53 | 8.14  | 8.28 | 8.38  | 7.99  | 7.57    | 8.38 | 8.72   | 7.06  | 10.31 |

<https://mc.manuscriptcentral.com/gut>



|    |      |      |      |      |      |      |      |      |       |
|----|------|------|------|------|------|------|------|------|-------|
| 1  |      |      |      |      |      |      |      |      |       |
| 2  | 8.23 | 8.25 | 8.55 | 8.02 | 6.96 | 8.4  | 8.82 | 7.41 | 10.17 |
| 3  | 8.23 | 7.6  | 8.56 | 7.55 | 6.89 | 8.25 | 8.41 | 7.48 | 10.51 |
| 4  | 8.47 | 7.61 | 8.67 | 7.74 | 6.62 | 8.39 | 8.59 | 7.39 | 10.45 |
| 5  | 8.35 | 7.44 | 8.69 | 7.68 | 6.95 | 8.51 | 8.7  | 7.29 | 10.43 |
| 6  | 8.37 | 7.56 | 8.75 | 7.73 | 6.46 | 8.19 | 8.56 | 7.27 | 10.42 |
| 7  | 8.26 | 8.24 | 8.63 | 7.94 | 6.84 | 8.11 | 8.21 | 7.63 | 10.3  |
| 8  | 8.14 | 8.21 | 8.5  | 8.11 | 6.8  | 8.57 | 8.52 | 7.54 | 10.54 |
| 9  | 8.39 | 8.63 | 8.51 | 8.09 | 6.64 | 8.8  | 8.48 | 7.67 | 10.67 |
| 10 | 8.65 | 8.81 | 8.14 | 7.99 | 6.44 | 8.89 | 8.56 | 8.14 | 10.57 |
| 11 | 7.62 | 8.75 | 7.63 | 8.51 | 7.4  | 8.45 | 8.72 | 7.06 | 9.98  |
| 12 | 7.88 | 8.39 | 8.52 | 8.15 | 6.81 | 8.35 | 8.68 | 6.71 | 9.85  |
| 13 | 7.57 | 8.39 | 8.47 | 8.24 | 6.96 | 8.16 | 8.68 | 6.87 | 9.93  |
| 14 | 7.76 | 8.18 | 8.41 | 8.22 | 7.19 | 8.34 | 8.79 | 6.91 | 9.88  |
| 15 | 7.96 | 8.47 | 7.96 | 6.15 | 9.15 | 6.74 | 6.74 | 8.32 | 10.61 |
| 16 | 8.03 | 8.1  | 8.02 | 7.6  | 8.27 | 6.65 | 8.36 | 8.21 | 11.17 |
| 17 | 7.83 | 8.11 | 8.69 | 7.02 | 7.3  | 6.71 | 8.34 | 7.3  | 10.95 |
| 18 | 9.53 | 9.23 | 9.6  | 0.24 | 8.69 | 1.24 | 9    | 8.23 | 12.42 |
| 19 | 9.31 | 8.52 | 9.37 | 3.1  | 8.52 | 1.77 | 8.93 | 8.31 | 11.85 |
| 20 | 8.04 | 8.58 | 8.46 | 7.5  | 6.37 | 7.78 | 8.14 | 6.77 | 10.27 |
| 21 | 8.16 | 8.77 | 8.56 | 7.28 | 6.27 | 7.46 | 8.01 | 6.48 | 10.39 |
| 22 | 8.13 | 8.63 | 8.69 | 7.33 | 6.51 | 7.33 | 7.98 | 6.95 | 10.41 |
| 23 | 7.83 | 8.79 | 9.24 | 7.99 | 6.33 | 8.74 | 8.69 | 6.9  | 10.44 |
| 24 | 7.86 | 8.79 | 9.18 | 7.68 | 6.19 | 8.38 | 8.35 | 7.14 | 10.59 |
| 25 | 7.82 | 8.57 | 9.58 | 6.75 | 6.44 | 7.62 | 8.73 | 6.63 | 10.78 |
| 26 | 8.31 | 9.19 | 8.73 | 8.05 | 6.31 | 8.46 | 8.75 | 7.22 | 10.35 |
| 27 | 8.42 | 9.45 | 8.71 | 7.94 | 6.17 | 8.63 | 8.69 | 7.56 | 10.42 |
| 28 | 8.46 | 9.46 | 8.75 | 8.03 | 6.52 | 8.75 | 8.8  | 7.48 | 10.44 |
| 29 | 7.63 | 7.5  | 9.33 | 8.09 | 6.75 | 7.78 | 8.76 | 7.2  | 10.63 |
| 30 | 7.69 | 7.27 | 9.49 | 8.08 | 7.05 | 7.71 | 8.99 | 7.24 | 10.61 |
| 31 | 7.7  | 7.84 | 9.44 | 7.91 | 6.75 | 7.65 | 8.83 | 7.11 | 10.75 |
| 32 | 8.2  | 8.32 | 8.83 | 7.28 | 6.33 | 7.51 | 8.95 | 7.03 | 11.11 |
| 33 | 8.2  | 8.09 | 8.9  | 7.24 | 6.66 | 7.82 | 8.79 | 7.29 | 10.81 |
| 34 | 8    | 8.35 | 8.91 | 7.42 | 6.63 | 7.68 | 8.76 | 7.19 | 11.1  |
| 35 | 7.65 | 8.27 | 8.84 | 7.14 | 6.34 | 7.1  | 8.23 | 6.98 | 10.47 |
| 36 | 7.54 | 8.59 | 8.77 | 7.18 | 6.29 | 7.24 | 8.18 | 6.75 | 10.41 |
| 37 | 7.66 | 8.29 | 8.73 | 7.11 | 6.75 | 7.16 | 8.19 | 7.09 | 10.63 |
| 38 | 7.76 | 8.33 | 8.95 | 6.74 | 6.19 | 6.98 | 7.98 | 6.74 | 10.73 |
| 39 | 7.76 | 8.33 | 8.95 | 6.74 | 6.19 | 6.98 | 7.98 | 6.74 | 10.73 |
| 40 | 7.65 | 8.51 | 8.7  | 7.17 | 6.49 | 6.86 | 8.14 | 6.86 | 10.91 |
| 41 | 7.61 | 8.49 | 8.94 | 6.76 | 6.2  | 6.86 | 8.28 | 6.37 | 10.93 |
| 42 | 7.87 | 8.74 | 8.76 | 6.86 | 6.06 | 7.16 | 8.13 | 6.81 | 11.03 |
| 43 | 7.46 | 8.13 | 9.16 | 6.91 | 6.28 | 6.84 | 7.82 | 6.76 | 11.17 |
| 44 | 7.32 | 7.81 | 8.81 | 7.31 | 6.2  | 7.52 | 8.31 | 6.96 | 10.83 |
| 45 | 7.37 | 8.01 | 8.53 | 7.81 | 6.34 | 7.66 | 7.95 | 6.61 | 10.66 |
| 46 | 7.47 | 8.02 | 8.95 | 7.04 | 6.28 | 7.04 | 8.01 | 6.76 | 11.12 |
| 47 | 7.23 | 9.01 | 8.15 | 8.12 | 6.59 | 7.83 | 8.39 | 6.65 | 10.55 |
| 48 | 7.1  | 8.95 | 8.28 | 8.19 | 6.62 | 7.68 | 8.32 | 6.63 | 10.5  |
| 49 | 7.18 | 8.83 | 7.84 | 8.04 | 7.16 | 7.54 | 8.25 | 7.09 | 10.51 |
| 50 | 7.36 | 8.02 | 8.97 | 6.74 | 5.88 | 6.72 | 7.96 | 6.55 | 11.03 |
| 51 | 7.51 | 7.99 | 8.79 | 6.58 | 6.28 | 6.85 | 8.13 | 6.67 | 11.02 |
| 52 | 7.33 | 8.04 | 8.9  | 6.59 | 5.95 | 6.96 | 8.17 | 6.41 | 11.11 |
| 53 | 7.46 | 7.85 | 8.82 | 7.1  | 6.01 | 6.66 | 7.94 | 6.1  | 11.09 |

<https://mc.manuscriptcentral.com/gut>

1  
2  
3  
4  
5  
6  
7  
8  
9  
10  
11  
12  
13  
14  
15  
16  
17  
18  
19  
20  
21  
22  
23  
24  
25  
26  
27  
28  
29  
30  
31  
32  
33  
34  
35  
36  
37  
38  
39  
40  
41  
42  
43  
44  
45  
46  
47  
48  
49  
50  
51  
52  
53  
54  
55  
56  
57  
58  
59  
60

|      |      |       |      |      |      |      |       |       |
|------|------|-------|------|------|------|------|-------|-------|
| 7.55 | 7.89 | 8.89  | 7.38 | 5.95 | 7.15 | 7.81 | 6.31  | 11.01 |
| 8.05 | 8.29 | 9.09  | 6.1  | 6.75 | 5.84 | 7.92 | 7.1   | 11.68 |
| 7.93 | 8.18 | 8.26  | 8.04 | 6.21 | 7.78 | 7.77 | 7.05  | 10.59 |
| 7.72 | 8.31 | 8.24  | 7.41 | 6.42 | 8.13 | 8.2  | 7.17  | 10.24 |
| 8.18 | 8.41 | 8.13  | 7.57 | 5.58 | 8.22 | 8.17 | 7.22  | 10.2  |
| 7.2  | 7.75 | 7.64  | 7.7  | 7.26 | 8.06 | 8.09 | 7.33  | 9.75  |
| 7.56 | 8.13 | 8.17  | 7.26 | 6.01 | 8.36 | 8    | 6.84  | 9.94  |
| 7.76 | 8    | 8.14  | 7.41 | 6.18 | 8.26 | 7.85 | 6.76  | 9.95  |
| 6.58 | 8.35 | 7.58  | 8.3  | 8.2  | 8.11 | 8.54 | 9.18  | 10.39 |
| 7.72 | 8.61 | 7.83  | 7.75 | 6.68 | 8.33 | 7.48 | 7.65  | 10.11 |
| 7.59 | 8.72 | 7.81  | 7.35 | 6.92 | 8.17 | 7.92 | 7.31  | 10.03 |
| 7.42 | 8.34 | 8.21  | 6.87 | 6    | 7.38 | 7.63 | 6.49  | 10.42 |
| 7.07 | 8.67 | 7.35  | 8.04 | 7.62 | 7.75 | 7.78 | 9.07  | 10.64 |
| 8.04 | 8.66 | 10.17 | 3.59 | 7.53 | 0.2  | 8.96 | 7.83  | 11.3  |
| 7.45 | 7.99 | 8.69  | 7.33 | 5.97 | 7.95 | 8.29 | 6.98  | 9.8   |
| 7.4  | 7.95 | 8.57  | 7.46 | 6    | 8.08 | 8.35 | 6.96  | 9.58  |
| 7.38 | 8.01 | 8.42  | 7.27 | 5.86 | 7.71 | 8.25 | 7.09  | 9.69  |
| 7.96 | 8.1  | 7.96  | 7.14 | 6.12 | 8.31 | 7.56 | 6.95  | 9.6   |
| 7.52 | 7.63 | 8.11  | 6.67 | 5.95 | 7.71 | 7.38 | 6.93  | 10.35 |
| 7.76 | 7.78 | 7.93  | 7.01 | 6.02 | 7.79 | 7.26 | 6.91  | 10.14 |
| 7.75 | 6.75 | 7.75  | 8.33 | 8.86 | 6.16 | 6.75 | 10.29 | 9.62  |
| 6.53 | 7.92 | 7.77  | 7.36 | 6.04 | 7.96 | 7.74 | 6.34  | 8.94  |
| 6.91 | 7.94 | 7.7   | 7.39 | 5.96 | 7.9  | 7.95 | 6.6   | 9.31  |
| 6.77 | 7.81 | 7.77  | 8.45 | 7.04 | 8    | 7.99 | 7.48  | 10.1  |
| 6.61 | 7.63 | 7.61  | 8.61 | 6.99 | 7.83 | 7.73 | 7.87  | 10.34 |
| 7.51 | 7.96 | 7.77  | 7.8  | 6.54 | 7.92 | 7.88 | 7.46  | 9.94  |
| 7.17 | 8.09 | 9.38  | 6.28 | 6.7  | 3.58 | 7.76 | 6.55  | 11.15 |
| 7.32 | 8.03 | 9.41  | 5.11 | 6.67 | 2.44 | 8.11 | 6.07  | 11.34 |
| 7.26 | 8.16 | 9.37  | 5.23 | 6.52 | 1.77 | 8.03 | 6.09  | 11.16 |
| 6.96 | 7.13 | 6.87  | 5.87 | 4.4  | 7.1  | 7.05 | 6.03  | 9.06  |
| 6.88 | 7.47 | 6.87  | 6.08 | 5.02 | 7.03 | 7.1  | 6.16  | 9.07  |
| 6.28 | 7.23 | 6.66  | 6.22 | 4.63 | 7.05 | 6.88 | 6.17  | 9.02  |
| 6.96 | 7.17 | 7.13  | 6.22 | 4.4  | 6.94 | 6.96 | 5.86  | 8.99  |
| 6.7  | 7.37 | 8.1   | 4.62 | 6.04 | 3.04 | 7.36 | 6.31  | 10.43 |
| 6.48 | 6.84 | 8.56  | 5.11 | 5.38 | 3.42 | 7.38 | 5.74  | 10.23 |
| 6.33 | 7.3  | 8.36  | 5.51 | 5.63 | 4.15 | 7.19 | 6.2   | 10.13 |
| 7.56 | 7.62 | 8.58  | 0.32 | 6.92 | 0    | 7.84 | 6.72  | 10.84 |
| 6.38 | 7.29 | 8.48  | 5.58 | 5.86 | 1.34 | 7.19 | 4.66  | 10.73 |
| 6.31 | 7.47 | 8.42  | 6.23 | 5.42 | 1.1  | 7.07 | 5.18  | 10.85 |
| 6.4  | 7.23 | 8.53  | 5.89 | 4.83 | 2.31 | 7.2  | 5.52  | 10.89 |
| 8.11 | 7.66 | 7     | 3.41 | 7.93 | 2.41 | 7.05 | 7.93  | 11.68 |
| 7.45 | 8.2  | 9.57  | 6.41 | 6.61 | 4.06 | 7.73 | 6.78  | 11.48 |
| 7.74 | 8.53 | 9.79  | 5.9  | 6.86 | 0.33 | 8.36 | 6.54  | 11.47 |
| 7.04 | 7.97 | 8.99  | 7.26 | 6.57 | 5.91 | 7.86 | 7.12  | 10.61 |
| 7.3  | 8.15 | 9.28  | 6.02 | 6.57 | 4    | 7.96 | 6.89  | 11.35 |
| 7.01 | 8.01 | 9.04  | 7    | 6.39 | 6.03 | 7.87 | 6.96  | 11.05 |
| 6.62 | 8.23 | 9.54  | 7.23 | 6.38 | 4.2  | 8.32 | 6.98  | 11.51 |
| 7.13 | 8.48 | 9.75  | 5.61 | 6.38 | 0.71 | 8.22 | 6.41  | 11.83 |
| 7.65 | 8.37 | 9.08  | 4.8  | 7.06 | 2.48 | 8.11 | 7.05  | 11.95 |
| 7.64 | 7.48 | 8.2   | 6.57 | 5.72 | 7.11 | 7.61 | 6.37  | 10.73 |
| 7.37 | 7.44 | 7.98  | 6.51 | 6.15 | 7.25 | 7.81 | 6.92  | 10.75 |
| 7.27 | 7.5  | 8.13  | 6.04 | 6.04 | 7.16 | 7.86 | 6.99  | 10.71 |

<https://mc.manuscriptcentral.com/gut>

1  
2  
3  
4  
5  
6  
7  
8  
9  
10  
11  
12  
13  
14  
15  
16  
17  
18  
19  
20  
21  
22  
23  
24  
25  
26  
27  
28  
29  
30  
31  
32  
33  
34  
35  
36  
37  
38  
39  
40  
41  
42  
43  
44  
45  
46  
47  
48  
49  
50  
51  
52  
53  
54  
55  
56  
57  
58  
59  
60

|      |      |      |      |      |      |       |      |       |
|------|------|------|------|------|------|-------|------|-------|
| 7.6  | 7.54 | 8.08 | 6.22 | 5.48 | 6.97 | 7.7   | 6.73 | 11.03 |
| 8.16 | 8.11 | 9.13 | 8.06 | 7.07 | 8.3  | 8.72  | 7.47 | 10.59 |
| 7.78 | 8.4  | 9.16 | 8.08 | 7.24 | 8.03 | 8.72  | 7.47 | 10.47 |
| 7.91 | 7.71 | 9.11 | 7.89 | 6.87 | 8.41 | 8.68  | 7.18 | 10.66 |
| 7.86 | 7.76 | 9.1  | 7.93 | 7.11 | 8.48 | 8.69  | 7.5  | 10.45 |
| 7.96 | 8.29 | 8.81 | 7.92 | 6.76 | 7.92 | 9.05  | 7.59 | 11.26 |
| 7.96 | 7.84 | 8.56 | 8.9  | 7.03 | 8.47 | 10.21 | 8.16 | 10.59 |
| 8.07 | 8.22 | 8.93 | 8.86 | 6.72 | 8.32 | 9.33  | 7.67 | 10.57 |
| 8.07 | 8.28 | 8.66 | 9.43 | 6.91 | 8.37 | 9.42  | 8.5  | 10.83 |
| 8.44 | 9.08 | 8.48 | 9    | 6.46 | 8.89 | 8.08  | 7.78 | 10.54 |
| 8.56 | 8.76 | 8.39 | 8.48 | 6.58 | 8.59 | 8.16  | 7.54 | 10.7  |
| 8.8  | 8.61 | 8.55 | 8.56 | 6.92 | 8.61 | 8.01  | 7.8  | 10.65 |
| 8.81 | 8.84 | 8.51 | 8.65 | 6.75 | 8.59 | 8.22  | 7.68 | 10.76 |
| 7.36 | 7.63 | 8.38 | 7.6  | 6.23 | 7.32 | 7.79  | 6.51 | 10.25 |
| 7.42 | 7.73 | 7.97 | 7.92 | 6.33 | 7.82 | 7.95  | 7.02 | 10.14 |
| 7.25 | 7.58 | 8.44 | 7.32 | 6.21 | 6.97 | 7.97  | 7.06 | 10.4  |
| 7.84 | 8.01 | 8.15 | 7.57 | 5.58 | 8.15 | 7.75  | 7.24 | 9.93  |
| 7.54 | 7.91 | 8.21 | 7.62 | 6.16 | 8.05 | 8.26  | 6.84 | 10.05 |
| 7.8  | 8.11 | 8.27 | 7.53 | 5.8  | 8.1  | 8     | 6.96 | 10    |
| 7.25 | 8.44 | 8.16 | 7.97 | 5.97 | 7.9  | 8.14  | 6.93 | 11.47 |
| 7.64 | 7.43 | 8.22 | 7.56 | 6.11 | 7.95 | 8.55  | 7.07 | 9.7   |
| 7.48 | 7.47 | 8.29 | 8.15 | 6.16 | 7.94 | 8.83  | 6.75 | 9.94  |
| 7.52 | 8.35 | 8.32 | 7.08 | 6.28 | 8.07 | 7.68  | 7.01 | 9.87  |
| 7.3  | 8.31 | 8.38 | 7.16 | 5.84 | 8.73 | 7.34  | 7.02 | 9.89  |
| 6.61 | 8.96 | 8.15 | 8.36 | 7.67 | 8.7  | 7.74  | 9.28 | 9.7   |
| 6.77 | 7.24 | 7.02 | 6.98 | 5.01 | 7.42 | 7.38  | 6.63 | 8.95  |
| 6.98 | 7.08 | 7.13 | 6.08 | 5.11 | 7.2  | 7.52  | 6.43 | 9.53  |
| 6.72 | 6.84 | 7.02 | 6.52 | 4.89 | 7.68 | 7.49  | 6.73 | 9.35  |
| 7.26 | 7.68 | 7.29 | 6.48 | 5.9  | 6.65 | 7.42  | 5.48 | 8.76  |
| 5.85 | 7.82 | 8.39 | 5.22 | 5.34 | 2.76 | 6.93  | 5.22 | 10.79 |
| 6.42 | 6.99 | 8.6  | 5.58 | 5.24 | 4.53 | 7.15  | 5.76 | 10.79 |
| 6.31 | 7.03 | 8.77 | 5.69 | 5.74 | 2.88 | 7.39  | 5.13 | 11.17 |
| 6.57 | 7.11 | 8.66 | 5.81 | 5.71 | 0.96 | 6.93  | 4.96 | 10.92 |
| 6    | 7.38 | 7.53 | 5.96 | 5.17 | 6.52 | 6.79  | 5.36 | 9.2   |
| 5.61 | 7.28 | 7.71 | 5.42 | 5.61 | 5.85 | 6.84  | 5.22 | 9.72  |
| 6.16 | 7.37 | 7.96 | 5.12 | 5.23 | 6.12 | 7.03  | 5.29 | 9.69  |
| 6.12 | 6.98 | 7.68 | 5.84 | 5.3  | 6.2  | 6.92  | 5.4  | 9.39  |
| 7.96 | 7.54 | 8.39 | 7.52 | 6.21 | 8.08 | 7.8   | 7.19 | 9.75  |
| 7.71 | 8.36 | 8.9  | 7.46 | 6.32 | 8.57 | 8.19  | 7.27 | 10.02 |
| 7.6  | 8.17 | 7.94 | 7.98 | 6.46 | 8.3  | 8.01  | 6.85 | 9.81  |
| 7.04 | 7.85 | 7.4  | 8.26 | 8.36 | 8.09 | 8.23  | 8.91 | 10.24 |
| 7.76 | 8.4  | 8.39 | 7.3  | 6.19 | 7.77 | 7.79  | 7.11 | 10.03 |
| 6.1  | 7.51 | 7.32 | 7.83 | 8.1  | 7.1  | 8.21  | 8.1  | 10.44 |
| 7.99 | 7.98 | 8.15 | 7.64 | 6.14 | 7.94 | 8.16  | 7    | 10.19 |
| 8.43 | 8.12 | 7.82 | 7.54 | 5.84 | 8.07 | 8.02  | 7.24 | 10.35 |
| 7.85 | 7.73 | 7.99 | 7.84 | 6.21 | 9.35 | 8.71  | 7.07 | 10.06 |
| 7.56 | 7.44 | 8.28 | 7.23 | 6.66 | 8.7  | 8.43  | 7.35 | 9.94  |
| 7.84 | 7.25 | 8.13 | 7.39 | 6.25 | 8.98 | 8.34  | 7.48 | 9.87  |
| 7.4  | 7.26 | 8.33 | 7.08 | 6.01 | 8.22 | 8.27  | 7.09 | 9.98  |
| 7.04 | 6.88 | 7.72 | 7.1  | 5.19 | 7.35 | 7.68  | 6.42 | 9.66  |
| 7.1  | 7.07 | 7.66 | 6.14 | 5.17 | 6.55 | 7.56  | 5.92 | 9.41  |
| 6.83 | 6.93 | 7.81 | 5.72 | 6.12 | 6.86 | 7.58  | 5.69 | 9.31  |

<https://mc.manuscriptcentral.com/gut>

1  
2  
3  
4  
5  
6  
7  
8  
9  
10  
11  
12  
13  
14  
15  
16  
17  
18  
19  
20  
21  
22  
23  
24  
25  
26  
27  
28  
29  
30  
31  
32  
33  
34  
35  
36  
37  
38  
39  
40  
41  
42  
43  
44  
45  
46  
47  
48  
49  
50  
51  
52  
53  
54  
55  
56  
57  
58  
59  
60

|      |      |      |      |      |      |      |      |       |
|------|------|------|------|------|------|------|------|-------|
| 6.94 | 7.46 | 7.73 | 6.77 | 5.79 | 7.25 | 7.81 | 6.88 | 9.4   |
| 6.56 | 6.68 | 7.81 | 6.83 | 6.49 | 7.7  | 6.93 | 6.56 | 8.99  |
| 6.26 | 6.31 | 7.56 | 6.61 | 5.67 | 7.27 | 7.29 | 6.37 | 8.71  |
| 6.32 | 6.93 | 8    | 7.06 | 5.66 | 7.49 | 6.85 | 6.07 | 8.96  |
| 6.01 | 6.84 | 8.8  | 5.46 | 7.17 | 4.88 | 6.95 | 6.84 | 9.81  |
| 6.97 | 7.44 | 7.13 | 6.63 | 5.29 | 7.47 | 7.81 | 6.51 | 8.94  |
| 7.11 | 7.34 | 6.61 | 6.49 | 5.13 | 7.22 | 7.71 | 6.77 | 9.19  |
| 7.12 | 7.27 | 6.42 | 6.85 | 5.35 | 7.15 | 7.76 | 6.84 | 9.35  |
| 7.11 | 7.77 | 9.07 | 4.18 | 5.97 | 0.27 | 8.01 | 6.27 | 10.53 |
| 6.9  | 7.54 | 8.35 | 6.11 | 6.01 | 6.02 | 7.51 | 6.07 | 10.16 |
| 7.54 | 7.72 | 7.75 | 7.36 | 6.01 | 7.59 | 7.47 | 6.88 | 9.64  |
| 7.35 | 7.66 | 7.9  | 6.75 | 6.47 | 7.16 | 7.47 | 6.41 | 9.5   |
| 7.53 | 7.92 | 7.67 | 7.4  | 6.14 | 7.89 | 7.68 | 7.08 | 9.72  |
| 7.52 | 7.58 | 8    | 6.85 | 6.26 | 7.38 | 7.42 | 6.39 | 9.5   |
| 5.54 | 8.81 | 8.13 | 8.07 | 7.83 | 7.13 | 6.35 | 9.04 | 10.99 |
| 6.82 | 8.17 | 7.32 | 7.51 | 6.44 | 7.04 | 8.07 | 7.07 | 10.25 |
| 6.91 | 8.17 | 7.76 | 6.86 | 5.56 | 6.79 | 7.85 | 6.18 | 9.94  |
| 6.71 | 8.29 | 7.18 | 7.55 | 6.49 | 7.15 | 8.22 | 7.36 | 10.12 |

1  
2  
3  
4  
5  
6  
7  
8  
9  
10  
11  
12  
13  
14  
15  
16  
17  
18  
19  
20  
21  
22  
23  
24  
25  
26  
27  
28  
29  
30  
31  
32  
33  
34  
35  
36  
37  
38  
39  
40  
41  
42  
43  
44  
45  
46  
47  
48  
49  
50  
51  
52  
53  
54  
55  
56  
57  
58  
59  
60

| GPATCH3 | HDAC3 | MRPS5 | MTMR14 | NOL7 | NUBP1 | PRPF38A | SAP130 | SF3A3 |
|---------|-------|-------|--------|------|-------|---------|--------|-------|
| 7.78    | 7.78  | 8.25  | 7.39   | 7.08 | 4.56  | 8.59    | 6.7    | 8.21  |
| 6.67    | 7.25  | 8.32  | 7.56   | 7.63 | 5.81  | 8.37    | 7.22   | 8.26  |
| 7.39    | 7.68  | 8.25  | 7.32   | 7.28 | 5.4   | 8.44    | 7.22   | 8.37  |
| 6.27    | 7.23  | 8.41  | 7.75   | 7.82 | 5.76  | 8.45    | 7.8    | 8.91  |
| 8.36    | 8.6   | 8.56  | 7.68   | 5.18 | 2.01  | 9.81    | 1.01   | 8.68  |
| 7.04    | 7.58  | 8.06  | 7.45   | 7.3  | 5.47  | 8.51    | 6.34   | 8.48  |
| 6.94    | 7.61  | 8.04  | 7.52   | 7.67 | 5.17  | 8.29    | 6.74   | 8.41  |
| 6.75    | 7.66  | 7.95  | 8.08   | 7.57 | 5.82  | 8.2     | 7.42   | 9.08  |
| 6.56    | 7.49  | 8.5   | 8.26   | 8.62 | 6.07  | 8.12    | 6.95   | 9.06  |
| 7.03    | 7.19  | 9.21  | 7.06   | 8.47 | 5.74  | 8.55    | 7.26   | 8.94  |
| 5.67    | 7.11  | 8.85  | 7.92   | 8.94 | 6.24  | 8.63    | 7.74   | 9.2   |
| 5.89    | 7.22  | 9.24  | 7.91   | 8.83 | 6.27  | 8.56    | 7.49   | 9.37  |
| 7.34    | 7.8   | 8.92  | 7.8    | 8.57 | 5.81  | 9.17    | 7.47   | 8.79  |
| 7.4     | 7.99  | 8.78  | 7.66   | 8.31 | 5.63  | 9.24    | 7.29   | 8.84  |
| 8.16    | 8.35  | 8.24  | 8.65   | 7.55 | 4.77  | 8.84    | 7.32   | 9.76  |
| 8.07    | 7.71  | 8.73  | 7.54   | 8.01 | 5.7   | 9.07    | 6.83   | 8.51  |
| 8.12    | 7.78  | 9.08  | 7.31   | 8.13 | 5.1   | 9.08    | 6.65   | 8.79  |
| 7.86    | 7.85  | 9.01  | 7.19   | 7.74 | 5.15  | 8.84    | 7.19   | 8.82  |
| 7.18    | 7.67  | 8.72  | 8.86   | 8.07 | 5.6   | 9.27    | 7.65   | 9.48  |
| 6.57    | 7.94  | 9.09  | 8.41   | 9.04 | 6.18  | 8.95    | 8.09   | 9.21  |
| 6.67    | 7.96  | 8.88  | 8.72   | 8.55 | 5.79  | 8.78    | 7.94   | 9.31  |
| 5.93    | 8.01  | 8.6   | 7.81   | 9.21 | 5.98  | 8.72    | 8.19   | 9.26  |
| 6.03    | 8.33  | 8.61  | 8.01   | 8.99 | 6.06  | 8.75    | 8.16   | 9.25  |
| 6.08    | 8     | 8.56  | 7.81   | 8.98 | 6.16  | 8.72    | 7.99   | 9.2   |
| 6.77    | 7.81  | 9.18  | 7.68   | 9.09 | 5.98  | 8.8     | 7.84   | 9.34  |
| 6.22    | 7.56  | 9.05  | 8.05   | 9.45 | 7     | 8.77    | 7.96   | 9.14  |
| 6.47    | 7.44  | 9.05  | 8.18   | 9.27 | 6.56  | 8.57    | 7.85   | 9     |
| 7.6     | 7.6   | 8.85  | 7.96   | 8.61 | 5.64  | 8.64    | 7.13   | 8.49  |
| 7.73    | 7.86  | 8.41  | 7.29   | 7.84 | 5.98  | 8.53    | 7.03   | 8.72  |
| 7.82    | 7.84  | 8.62  | 7.44   | 8.26 | 5.33  | 8.59    | 7.25   | 8.34  |
| 7.63    | 7.8   | 8.27  | 7.32   | 8.08 | 6.22  | 8.43    | 7.08   | 8.53  |
| 8.26    | 7.67  | 8.62  | 7.29   | 7.15 | 5.46  | 8.66    | 6.32   | 8.62  |
| 7.1     | 7.88  | 8.45  | 8.25   | 7.47 | 5.52  | 8.74    | 6.64   | 8.54  |
| 6.19    | 7.83  | 8.88  | 7.75   | 8.67 | 5.89  | 8.51    | 7.72   | 8.91  |
| 5.93    | 7.67  | 9.09  | 7.83   | 8.98 | 5.47  | 8.49    | 7.94   | 8.89  |
| 6.33    | 7.6   | 9.03  | 7.99   | 8.44 | 5.47  | 8.66    | 7.49   | 9.01  |
| 6.49    | 7.67  | 8.22  | 8.28   | 7.77 | 5.45  | 8.28    | 7.35   | 8.9   |
| 5.9     | 7.29  | 8.56  | 7.71   | 8.33 | 4.86  | 8.36    | 7.33   | 8.69  |
| 6.07    | 7.39  | 7.79  | 7.85   | 7.6  | 5.45  | 8.37    | 7      | 8.51  |
| 6.17    | 7.26  | 8.25  | 7.73   | 7.82 | 5.33  | 8.17    | 7.17   | 8.39  |
| 7.19    | 7.42  | 8.5   | 6.73   | 6.35 | 4.16  | 8.35    | 5.82   | 8.04  |
| 6.73    | 7.15  | 8.64  | 6.48   | 6.61 | 4.29  | 8.59    | 6.13   | 7.94  |
| 6.73    | 7.03  | 8.59  | 6.77   | 6.71 | 4.39  | 8.4     | 6      | 7.79  |
| 5.92    | 7.09  | 8.64  | 6.65   | 7.43 | 4.57  | 8.41    | 6.86   | 8.24  |
| 8.07    | 7.56  | 8.81  | 7.32   | 5.86 | 4.45  | 9.2     | 6.03   | 9.72  |
| 5.71    | 7     | 8.37  | 7.03   | 7    | 5.22  | 8.1     | 6.97   | 8.34  |
| 5.17    | 7.19  | 8.3   | 7.12   | 7.12 | 5.7   | 8.34    | 7.23   | 8.46  |
| 5.67    | 7.27  | 8.16  | 7.2    | 7.37 | 5.17  | 8.15    | 6.94   | 8.61  |
| 7.09    | 8.22  | 9.18  | 8.38   | 8.92 | 6.36  | 9.38    | 7.91   | 8.86  |
| 6.53    | 8.4   | 9.29  | 8.18   | 9.37 | 6.28  | 9.22    | 8.19   | 8.97  |
| 6.28    | 8.71  | 9.37  | 8.2    | 9.27 | 6.2   | 9.16    | 8.24   | 9.13  |

<https://mc.manuscriptcentral.com/gut>

1  
2  
3  
4  
5  
6  
7  
8  
9  
10  
11  
12  
13  
14  
15  
16  
17  
18  
19  
20  
21  
22  
23  
24  
25  
26  
27  
28  
29  
30  
31  
32  
33  
34  
35  
36  
37  
38  
39  
40  
41  
42  
43  
44  
45  
46  
47  
48  
49  
50  
51  
52  
53  
54  
55  
56  
57  
58  
59  
60

|      |      |      |      |       |      |       |      |      |
|------|------|------|------|-------|------|-------|------|------|
| 6.54 | 8.67 | 9.13 | 8.09 | 9.27  | 6.44 | 9.18  | 8.13 | 9.08 |
| 7.82 | 7.97 | 8.89 | 8.16 | 8.72  | 5.03 | 9.12  | 8.17 | 8.85 |
| 7.98 | 7.84 | 8.85 | 7.9  | 8.66  | 5.19 | 9.23  | 7.91 | 8.82 |
| 7.49 | 7.81 | 8.92 | 8.13 | 8.88  | 5.24 | 9.05  | 8.15 | 8.62 |
| 7.82 | 7.92 | 8.87 | 8    | 8.64  | 5.46 | 9.3   | 8.07 | 8.65 |
| 7.26 | 7.73 | 9.3  | 8.26 | 8.88  | 5.98 | 8.96  | 8.26 | 9.26 |
| 6.62 | 8.06 | 9.15 | 8.02 | 9     | 6    | 9.11  | 8.35 | 9.54 |
| 6.96 | 7.97 | 9.2  | 8.18 | 9.01  | 6.16 | 9.38  | 8.41 | 9.74 |
| 6.83 | 7.88 | 9.5  | 8.1  | 8.7   | 6.19 | 9.3   | 8.24 | 9.65 |
| 6.46 | 8.57 | 8.51 | 7.93 | 8.85  | 6.62 | 9.33  | 7.99 | 9.19 |
| 6.4  | 8.03 | 8.93 | 8.06 | 8.75  | 6.54 | 9.01  | 8.15 | 9.21 |
| 6.53 | 8.22 | 9.13 | 7.75 | 8.74  | 6.46 | 9.11  | 8.07 | 9.36 |
| 6.52 | 8.07 | 8.96 | 7.89 | 8.85  | 6.56 | 9.1   | 7.99 | 9.39 |
| 9.74 | 8.32 | 7.47 | 7.47 | 7.15  | 6.74 | 9.54  | 7.15 | 8.85 |
| 7.7  | 8.57 | 8.57 | 8    | 7.13  | 5.11 | 8.95  | 6.65 | 8.94 |
| 7.49 | 8.14 | 8.89 | 8.04 | 7.72  | 4.95 | 8.98  | 6.65 | 8.74 |
| 8.79 | 9.22 | 9.35 | 8.52 | 5.7   | 1.83 | 10.38 | 2.57 | 9.25 |
| 9.34 | 9.34 | 9.37 | 7.72 | 6.42  | 2.36 | 9.53  | 3.36 | 8.37 |
| 7.52 | 8.08 | 8.95 | 7.73 | 8.49  | 6.39 | 9.18  | 7.75 | 9.21 |
| 7.56 | 8.13 | 9.08 | 7.72 | 8.52  | 6.46 | 9.17  | 7.66 | 8.86 |
| 7.91 | 8.04 | 8.84 | 7.75 | 7.96  | 6.15 | 8.95  | 7.52 | 9.03 |
| 6.13 | 8.19 | 8.95 | 8.03 | 9.04  | 7.12 | 9.2   | 8.15 | 9.29 |
| 6.83 | 7.91 | 8.67 | 8.02 | 9.14  | 6.96 | 9.18  | 7.92 | 9.18 |
| 7.18 | 8.37 | 8.51 | 7.65 | 8.78  | 5.44 | 9.26  | 7.75 | 8.88 |
| 6.06 | 7.91 | 9.24 | 8.45 | 9.21  | 6.25 | 9.06  | 8.41 | 9    |
| 6.21 | 7.92 | 9.24 | 8.39 | 9.34  | 6.78 | 8.73  | 8.31 | 8.81 |
| 6.12 | 7.98 | 9.04 | 8.4  | 9.33  | 6.9  | 8.7   | 8.28 | 8.91 |
| 6.91 | 8.52 | 9.32 | 7.44 | 9.9   | 5.31 | 9.51  | 8.06 | 9.11 |
| 6.96 | 8.48 | 9.17 | 7.39 | 10.04 | 4.93 | 9.44  | 8.14 | 9.27 |
| 7.31 | 8.61 | 9.36 | 7.38 | 9.64  | 4.85 | 9.42  | 7.84 | 9.05 |
| 7.67 | 8.12 | 9.25 | 8.07 | 8.37  | 4.98 | 9.18  | 7.88 | 8.79 |
| 7.81 | 8    | 9.61 | 8.01 | 8.53  | 5.2  | 9.11  | 7.91 | 8.99 |
| 8.01 | 8.36 | 9.41 | 8.03 | 8.2   | 4.8  | 9.18  | 7.55 | 8.69 |
| 7.35 | 7.9  | 8.92 | 7.85 | 7.95  | 5.31 | 9.09  | 7.09 | 8.55 |
| 7.48 | 7.9  | 8.84 | 7.78 | 8.03  | 5.63 | 9.21  | 7.12 | 8.49 |
| 7.24 | 8.03 | 8.72 | 7.82 | 7.94  | 5.59 | 9.03  | 7.14 | 8.69 |
| 8.34 | 8.08 | 8.65 | 8.14 | 7.37  | 4.96 | 8.96  | 6.74 | 8.82 |
| 8.34 | 8.08 | 8.65 | 8.14 | 7.37  | 4.96 | 8.96  | 6.74 | 8.82 |
| 7.7  | 8    | 8.78 | 8.22 | 7.49  | 4.73 | 8.88  | 6.66 | 9    |
| 7.89 | 8.05 | 8.72 | 8    | 7.47  | 4.7  | 9.04  | 6.95 | 8.86 |
| 7.43 | 8.06 | 8.62 | 7.98 | 7.65  | 4.73 | 8.69  | 7.16 | 8.91 |
| 8.01 | 8.07 | 8.55 | 8.13 | 7.01  | 4.36 | 9.24  | 6.08 | 8.75 |
| 7.68 | 7.72 | 8.58 | 7.44 | 8.26  | 4.69 | 8.84  | 7.09 | 8.48 |
| 7.28 | 7.77 | 8.68 | 7.62 | 8.63  | 5.78 | 8.57  | 7.5  | 8.34 |
| 7.64 | 7.92 | 8.66 | 7.63 | 7.54  | 4.52 | 9.03  | 6.52 | 8.56 |
| 6.81 | 7.96 | 8.88 | 7.95 | 8.56  | 6.56 | 9.08  | 7.74 | 9.38 |
| 6.78 | 7.72 | 8.76 | 7.95 | 8.43  | 6.68 | 9.07  | 7.62 | 9.29 |
| 7.42 | 8.09 | 8.44 | 8.19 | 7.89  | 6.78 | 9.06  | 7.29 | 9.36 |
| 7.86 | 7.99 | 8.67 | 7.81 | 7.01  | 4.32 | 9.11  | 5.86 | 8.63 |
| 7.65 | 7.84 | 8.43 | 7.33 | 7.11  | 5.02 | 8.93  | 6.49 | 8.74 |
| 7.67 | 7.77 | 8.51 | 7.28 | 7.07  | 4.78 | 9.11  | 6.18 | 8.9  |
| 6.95 | 7.51 | 8.69 | 8.03 | 7.33  | 4.79 | 9.27  | 6.26 | 8.58 |

<https://mc.manuscriptcentral.com/gut>

|    |       |      |      |      |      |      |       |      |      |
|----|-------|------|------|------|------|------|-------|------|------|
| 1  |       |      |      |      |      |      |       |      |      |
| 2  | 6.5   | 7.5  | 8.77 | 8.18 | 7.86 | 4.8  | 9.08  | 6.23 | 8.52 |
| 3  | 7.44  | 7.92 | 8.73 | 8.04 | 6.62 | 2.78 | 9.54  | 4.53 | 8.77 |
| 4  | 6.65  | 7.58 | 8.39 | 8.46 | 7.97 | 5.92 | 8.6   | 7.27 | 8.83 |
| 5  | 6.16  | 7.66 | 8.56 | 8.09 | 8.25 | 5.6  | 8.63  | 7.62 | 8.84 |
| 6  | 6.44  | 7.58 | 8.37 | 8.24 | 8.07 | 5.78 | 8.38  | 7.71 | 8.93 |
| 7  | 6.64  | 7.76 | 8.23 | 8.38 | 8.35 | 5.83 | 8.75  | 7.11 | 9.04 |
| 8  | 5.55  | 7.69 | 9.2  | 7.69 | 8.67 | 6.25 | 8.83  | 7.57 | 8.23 |
| 9  | 6.08  | 7.54 | 9.28 | 7.95 | 8.78 | 6.15 | 8.81  | 7.44 | 8.44 |
| 10 | 8.17  | 8.28 | 8.52 | 8.58 | 6.95 | 4.82 | 8.6   | 6.82 | 9.48 |
| 11 | 6.72  | 7.22 | 8.46 | 8.38 | 7.77 | 5.49 | 8.54  | 7.73 | 8.66 |
| 12 | 6.08  | 7.04 | 8.64 | 7.87 | 8.31 | 6.08 | 8.5   | 8.04 | 8.65 |
| 13 | 7.08  | 7.19 | 8.48 | 7.52 | 7.79 | 5.25 | 8.67  | 7.38 | 8.04 |
| 14 | 7.9   | 7.75 | 7.99 | 8.07 | 7.35 | 4.85 | 8.82  | 7.07 | 9.6  |
| 15 | 8.8   | 7.99 | 9.55 | 7.52 | 5.31 | 0.2  | 10.58 | 1.52 | 8.61 |
| 16 | 6.03  | 6.77 | 8.99 | 7.69 | 8.93 | 5.56 | 8.72  | 8.5  | 9.35 |
| 17 | 5.79  | 6.92 | 9.19 | 7.55 | 9.1  | 6.06 | 8.85  | 8.55 | 9.43 |
| 18 | 5.91  | 7.02 | 8.98 | 7.6  | 8.84 | 5.71 | 8.8   | 8.33 | 9.38 |
| 19 | 6.06  | 7.38 | 8.57 | 8    | 7.66 | 5.84 | 8.25  | 7.43 | 8.72 |
| 20 | 6.61  | 7.33 | 8.27 | 7.61 | 6.92 | 5.34 | 8.3   | 6.4  | 8.47 |
| 21 | 6.4   | 7.41 | 8.37 | 7.82 | 7.16 | 5.44 | 8.34  | 6.77 | 8.58 |
| 22 | 10.37 | 7.49 | 7.49 | 6.16 | 5.16 | 5.16 | 8.16  | 6.16 | 7.75 |
| 23 | 5.98  | 7.7  | 8.58 | 7.1  | 8.23 | 5.54 | 8.63  | 7.36 | 8.45 |
| 24 | 6.12  | 7.8  | 8.37 | 7.67 | 8    | 4.99 | 8.61  | 7.12 | 8.48 |
| 25 | 7.64  | 7.48 | 8.43 | 7.69 | 7.57 | 5.09 | 8.45  | 6.79 | 8.85 |
| 26 | 7.96  | 7.71 | 8.32 | 7.99 | 7.19 | 5.43 | 8.33  | 6.76 | 8.99 |
| 27 | 6.59  | 7.34 | 8.21 | 7.79 | 7.88 | 5.83 | 8.31  | 6.88 | 9.07 |
| 28 | 8.71  | 8.17 | 8.66 | 7.13 | 4.7  | 1    | 9.38  | 4.17 | 8.35 |
| 29 | 9.05  | 8.42 | 8.89 | 7.01 | 5.81 | 0.86 | 9.4   | 3.44 | 8.33 |
| 30 | 8.77  | 8.48 | 8.66 | 7.32 | 5.77 | 1.77 | 9.33  | 3.77 | 8.09 |
| 31 | 5.1   | 6.38 | 7.23 | 6.93 | 7.36 | 4.47 | 7.32  | 6.62 | 7.48 |
| 32 | 4.91  | 6.28 | 7.11 | 6.47 | 7.19 | 4.5  | 7.11  | 6.92 | 8.3  |
| 33 | 5.72  | 6.68 | 7.45 | 6.77 | 7.3  | 4.5  | 7.52  | 6.72 | 7.99 |
| 34 | 4.68  | 6.42 | 6.95 | 6.73 | 7.5  | 4.55 | 7.71  | 6.87 | 8.14 |
| 35 | 7.83  | 7.27 | 7.75 | 6.26 | 3.62 | 0.45 | 8.38  | 0.45 | 7.65 |
| 36 | 7.61  | 7.37 | 7.95 | 5.95 | 4.95 | 1.25 | 8.16  | 1.25 | 7.53 |
| 37 | 7.29  | 7.24 | 7.71 | 6.32 | 4.99 | 1.93 | 8.2   | 3.8  | 7.4  |
| 38 | 7.77  | 8.14 | 8.38 | 6.37 | 5.53 | 0    | 8.59  | 0.32 | 7.71 |
| 39 | 7.91  | 7.62 | 7.83 | 6.51 | 1.34 | 1.34 | 8.65  | 3.66 | 7.68 |
| 40 | 7.65  | 7.16 | 7.93 | 6.27 | 3.42 | 2.1  | 8.64  | 1.1  | 7.57 |
| 41 | 7.65  | 7.31 | 7.8  | 6.61 | 1.89 | 1.31 | 8.61  | 3.12 | 8.04 |
| 42 | 8.9   | 7.93 | 6.32 | 4.73 | 2.41 | 2.41 | 7.5   | 2.41 | 7.11 |
| 43 | 8.89  | 8.39 | 8.71 | 7.4  | 5.23 | 2.06 | 9.52  | 3.06 | 8.62 |
| 44 | 9.25  | 8.71 | 9.28 | 7.5  | 5.65 | 0.91 | 9.82  | 0.33 | 8.77 |
| 45 | 8.5   | 8.04 | 8.24 | 7.42 | 6.04 | 3.19 | 9     | 5.62 | 8.3  |
| 46 | 8.68  | 8.18 | 8.63 | 7.2  | 5.24 | 2.33 | 9.38  | 3.92 | 8.52 |
| 47 | 7.8   | 7.63 | 8.22 | 7.17 | 6.16 | 3    | 8.96  | 5.16 | 8.64 |
| 48 | 8.08  | 7.98 | 8.6  | 7.08 | 5.54 | 0.3  | 9.42  | 3.62 | 8.59 |
| 49 | 8.31  | 8.01 | 8.98 | 6.9  | 5.84 | 2.29 | 9.63  | 2.71 | 8.55 |
| 50 | 7.9   | 7.94 | 8.65 | 7.25 | 6.13 | 1.48 | 9.01  | 2.9  | 8.58 |
| 51 | 6.82  | 7.31 | 8.78 | 6.69 | 8    | 4.56 | 8.65  | 6.96 | 8.36 |
| 52 | 6.54  | 6.94 | 9.51 | 6.96 | 7.93 | 4.6  | 8.64  | 7.7  | 8.29 |
| 53 | 6.83  | 7    | 9.39 | 6.99 | 7.69 | 4.12 | 8.67  | 7.59 | 8.4  |

<https://mc.manuscriptcentral.com/gut>

1  
2  
3  
4  
5  
6  
7  
8  
9  
10  
11  
12  
13  
14  
15  
16  
17  
18  
19  
20  
21  
22  
23  
24  
25  
26  
27  
28  
29  
30  
31  
32  
33  
34  
35  
36  
37  
38  
39  
40  
41  
42  
43  
44  
45  
46  
47  
48  
49  
50  
51  
52  
53  
54  
55  
56  
57  
58  
59  
60

|      |      |      |      |      |      |      |      |      |
|------|------|------|------|------|------|------|------|------|
| 7.2  | 7.26 | 9.31 | 6.76 | 7.77 | 3.97 | 8.72 | 7.61 | 8.28 |
| 7.86 | 8.4  | 8.89 | 8.14 | 8.57 | 5.16 | 9.29 | 7.98 | 9.23 |
| 8.03 | 8.33 | 8.95 | 8.05 | 8.76 | 5.32 | 9.2  | 7.99 | 9.12 |
| 8.01 | 8.36 | 9.03 | 7.96 | 8.97 | 5.26 | 9.41 | 7.64 | 9.28 |
| 8.01 | 8.23 | 8.99 | 8.04 | 8.75 | 5.24 | 9.43 | 7.58 | 9.14 |
| 7.63 | 8.36 | 9.24 | 8.28 | 8.58 | 5.47 | 9.09 | 7.7  | 9.09 |
| 7.98 | 8.77 | 9.32 | 8.57 | 8.81 | 5.75 | 9.4  | 8.15 | 9.84 |
| 7.76 | 8.58 | 9.48 | 8.3  | 9.26 | 5.84 | 9.43 | 8.26 | 9.37 |
| 8.16 | 8.75 | 8.82 | 8.56 | 8.22 | 5.87 | 9.51 | 8.11 | 9.85 |
| 7.05 | 8.15 | 9.51 | 7.95 | 9.36 | 6.41 | 8.89 | 8.04 | 9.36 |
| 6.38 | 8.14 | 9.54 | 8.1  | 8.98 | 6.23 | 8.82 | 8.2  | 9.09 |
| 6.91 | 8.09 | 9.51 | 8.25 | 8.7  | 6.09 | 8.61 | 8.3  | 8.91 |
| 6.42 | 7.99 | 9.64 | 8.3  | 9.16 | 6.04 | 8.7  | 7.99 | 9.19 |
| 6.44 | 7.75 | 8.8  | 7.9  | 8.25 | 5.89 | 8.42 | 7.06 | 8.83 |
| 5.64 | 7.66 | 9.02 | 7.84 | 8.89 | 6.14 | 8.51 | 7.63 | 9.08 |
| 7.18 | 7.92 | 8.43 | 8.05 | 7.53 | 5.5  | 8.7  | 6.5  | 8.9  |
| 6.58 | 7.64 | 8.49 | 8.45 | 7.57 | 5.85 | 8.52 | 7.19 | 9    |
| 5.71 | 7.59 | 8.78 | 7.91 | 8.36 | 5.71 | 8.66 | 7.31 | 9.11 |
| 5.69 | 7.38 | 8.56 | 8.19 | 8.36 | 5.73 | 8.38 | 7.45 | 9.16 |
| 6.5  | 7.4  | 8.43 | 7.95 | 8.42 | 5.6  | 8.87 | 7.64 | 8.87 |
| 5.71 | 7.88 | 9.15 | 7.67 | 9.42 | 5.3  | 8.37 | 8.13 | 8.69 |
| 5.67 | 7.78 | 9.15 | 7.57 | 9.4  | 5.06 | 8.46 | 8.59 | 8.62 |
| 7.43 | 7.76 | 8.12 | 7.5  | 7.63 | 5.57 | 8.62 | 6.69 | 8.42 |
| 7.44 | 7.9  | 8.01 | 7.75 | 7.54 | 5.79 | 8.67 | 6.51 | 8.45 |
| 8.06 | 7.74 | 7.67 | 7.91 | 6.61 | 5.15 | 8.96 | 6.85 | 9.4  |
| 5.32 | 6.79 | 7.75 | 7.05 | 7.61 | 5.17 | 7.99 | 6.47 | 7.97 |
| 5.49 | 6.52 | 7.97 | 6.92 | 7.55 | 5.18 | 7.76 | 6.52 | 7.57 |
| 4.52 | 6.61 | 8.43 | 6.29 | 8.04 | 5.05 | 7.88 | 6.45 | 7.21 |
| 5.6  | 6.99 | 7.48 | 6.42 | 7.83 | 5.81 | 8.01 | 6.48 | 8.07 |
| 7.73 | 7.73 | 7.59 | 6.66 | 3.34 | 1.76 | 8.88 | 1.76 | 7.62 |
| 7.6  | 7.06 | 7.64 | 6.91 | 4.42 | 1.72 | 8.42 | 3.3  | 8.1  |
| 7.77 | 7.48 | 7.76 | 6.86 | 4.97 | 0.88 | 8.67 | 0.88 | 7.68 |
| 7.76 | 7.13 | 7.97 | 7.13 | 4.76 | 2.54 | 8.46 | 2.54 | 7.75 |
| 6.85 | 6.88 | 7.14 | 6.72 | 6.86 | 4.61 | 7.71 | 5.55 | 7.12 |
| 7.12 | 6.87 | 7.42 | 6.51 | 5.98 | 3.75 | 7.94 | 4.47 | 7.33 |
| 7.03 | 6.88 | 7.46 | 6.44 | 6.21 | 3.47 | 8.03 | 5.01 | 7.18 |
| 6.93 | 6.9  | 7.13 | 6.35 | 5.91 | 4.07 | 7.86 | 5.19 | 7.37 |
| 6.26 | 7.71 | 8.24 | 8.7  | 8.29 | 5.68 | 8.69 | 7.75 | 9.06 |
| 6.63 | 7.48 | 8.64 | 7.65 | 7.71 | 4.46 | 8.16 | 7.9  | 9.02 |
| 6.72 | 8    | 8.77 | 8.41 | 8.13 | 6.06 | 8.92 | 7.79 | 8.96 |
| 8.36 | 8.74 | 7.69 | 8.52 | 7.4  | 4.55 | 9.05 | 7.23 | 9.73 |
| 7    | 7.43 | 8.78 | 7.67 | 8.28 | 5.12 | 9.01 | 7.26 | 8.32 |
| 8.76 | 7.97 | 8.21 | 8.51 | 8.42 | 6.1  | 8.21 | 7.1  | 9.42 |
| 5.73 | 7.5  | 8.84 | 7.7  | 8.62 | 6.15 | 8.65 | 8.1  | 8.75 |
| 5.46 | 7.47 | 8.61 | 7.68 | 8.31 | 6.22 | 8.43 | 8.2  | 8.8  |
| 7.09 | 6.68 | 8.64 | 7.45 | 8.82 | 3.68 | 8.86 | 8.29 | 9.07 |
| 7.58 | 7.15 | 8.37 | 7.66 | 7.85 | 4.74 | 8.46 | 7.41 | 9.15 |
| 7.23 | 6.58 | 8.57 | 7.71 | 8.26 | 4.92 | 8.68 | 7.99 | 9.17 |
| 8.09 | 7.2  | 8.51 | 7.6  | 8.27 | 4.5  | 8.6  | 7.59 | 8.8  |
| 5.35 | 7.47 | 7.92 | 6.95 | 7.67 | 4.89 | 7.84 | 7.33 | 8.39 |
| 6.57 | 7.13 | 7.42 | 6.68 | 7.32 | 4.11 | 7.67 | 6.34 | 7.87 |
| 6.78 | 7.14 | 7.68 | 6.33 | 6.97 | 3.64 | 7.79 | 6.19 | 7.91 |

<https://mc.manuscriptcentral.com/gut>



1  
2  
3  
4  
5  
6  
7  
8  
9  
10  
11  
12  
13  
14  
15  
16  
17  
18  
19  
20  
21  
22  
23  
24  
25  
26  
27  
28  
29  
30  
31  
32  
33  
34  
35  
36  
37  
38  
39  
40  
41  
42  
43  
44  
45  
46  
47  
48  
49  
50  
51  
52  
53  
54  
55  
56  
57  
58  
59  
60

|      |      |      |      |      |      |      |      |      |
|------|------|------|------|------|------|------|------|------|
| 5.79 | 7.08 | 7.76 | 6.88 | 6.83 | 4.49 | 7.8  | 6.7  | 8.55 |
| 6.74 | 6.74 | 8.34 | 7.25 | 7.29 | 4.68 | 7.42 | 5.68 | 8.14 |
| 6.81 | 6.52 | 8.72 | 7.46 | 7.31 | 4.29 | 8.09 | 5.98 | 7.91 |
| 6.22 | 6.55 | 8.8  | 7.35 | 7.52 | 4.66 | 8.21 | 5.74 | 8.16 |
| 8.69 | 7.44 | 8.47 | 6.55 | 4.72 | 1.55 | 8.64 | 2.55 | 7.74 |
| 5.02 | 7.1  | 8.92 | 7.06 | 8.28 | 4.81 | 8.43 | 6.9  | 8.34 |
| 5.64 | 6.64 | 9.44 | 6.93 | 8.26 | 4.24 | 8.46 | 7.12 | 8.11 |
| 5.98 | 6.77 | 9.32 | 6.77 | 8.04 | 3.88 | 8.47 | 6.77 | 8.36 |
| 8.47 | 7.93 | 8.49 | 6.5  | 4.44 | 0.27 | 8.93 | 1.27 | 7.94 |
| 7.51 | 7.6  | 8.09 | 7.06 | 6.47 | 3.87 | 8.47 | 5.36 | 8.09 |
| 6.01 | 7.35 | 7.83 | 7.6  | 7.07 | 5.21 | 8.04 | 7.05 | 8.64 |
| 7.33 | 7.46 | 7.93 | 6.87 | 7.52 | 4.98 | 8.21 | 6.7  | 8.08 |
| 6.49 | 7.42 | 8.02 | 7.42 | 7.11 | 5.06 | 8.15 | 6.79 | 8.56 |
| 6.93 | 7.41 | 7.92 | 7.18 | 7.14 | 5.52 | 8.1  | 6.77 | 8.35 |
| 9.24 | 8.07 | 7.5  | 7.63 | 6.45 | 5.71 | 8.77 | 5.71 | 8.94 |
| 6.39 | 7.15 | 7.99 | 7.92 | 8.12 | 5.16 | 8.16 | 6.92 | 7.85 |
| 6.33 | 7.19 | 8.13 | 7.57 | 7.78 | 5.36 | 7.89 | 6.73 | 7.64 |
| 6.26 | 7.06 | 7.81 | 8.12 | 7.99 | 5.43 | 8.17 | 6.87 | 7.82 |

|    | TLK2 | TMUB2 | TRIM39 | USP39 | ZC3H14 | ZKSCAN5 | ZNF143 | ZNF346 |
|----|------|-------|--------|-------|--------|---------|--------|--------|
| 1  |      |       |        |       |        |         |        |        |
| 2  |      |       |        |       |        |         |        |        |
| 3  | 9.02 | 7.15  | 7.27   | 6.66  | 7.28   | 4.99    | 5.81   | 7.15   |
| 4  | 8.69 | 7.34  | 6.98   | 6.56  | 7.6    | 4.79    | 6.23   | 6.3    |
| 5  | 8.75 | 7.18  | 6.92   | 6.49  | 7.49   | 5.13    | 6.13   | 6.53   |
| 6  | 8.69 | 7.4   | 6.45   | 6.37  | 7.83   | 4.09    | 6.41   | 6.16   |
| 7  | 9.95 | 8.36  | 8.96   | 7.1   | 7.01   | 5.71    | 3.59   | 8.1    |
| 8  | 8.81 | 7.56  | 7.59   | 6.56  | 7.4    | 4.58    | 5.87   | 6.99   |
| 9  | 8.78 | 7.74  | 7.3    | 6.71  | 7.34   | 4.96    | 5.56   | 6.97   |
| 10 | 9.08 | 8.14  | 6.68   | 6.46  | 6.98   | 3.56    | 6.04   | 5.95   |
| 11 | 8.41 | 7.2   | 6.87   | 6.81  | 6.95   | 4.54    | 6.71   | 5.01   |
| 12 | 8.52 | 6.64  | 6.84   | 6.9   | 7.44   | 4.82    | 6.32   | 5.34   |
| 13 | 8.25 | 6.81  | 6.47   | 7.11  | 7.64   | 4.55    | 6.61   | 4.7    |
| 14 | 8.01 | 6.97  | 6.44   | 6.59  | 7.87   | 3.27    | 6.75   | 5.49   |
| 15 | 8.76 | 7.52  | 7.13   | 7.46  | 8.3    | 5.18    | 6.43   | 6.99   |
| 16 | 8.89 | 7.51  | 7.3    | 7.31  | 8.19   | 5.43    | 6.48   | 6.91   |
| 17 | 9.96 | 8.47  | 6.29   | 7.19  | 7.16   | 4.09    | 5.23   | 6.16   |
| 18 | 9.2  | 7.5   | 7.94   | 6.78  | 7.95   | 5.75    | 6.47   | 6.99   |
| 19 | 9.16 | 7.72  | 7.73   | 7.29  | 8.27   | 4.87    | 6.9    | 6.93   |
| 20 | 9.39 | 7.68  | 7.52   | 6.69  | 7.92   | 5.01    | 6.05   | 7.61   |
| 21 | 9.4  | 8.17  | 6.97   | 6.61  | 7.53   | 3.98    | 6.82   | 6.15   |
| 22 | 9    | 7.52  | 6.66   | 7.22  | 8.29   | 5.14    | 7.24   | 6.71   |
| 23 | 9.13 | 7.63  | 6.77   | 7.01  | 8.24   | 4.67    | 7.2    | 6.74   |
| 24 | 8.97 | 7.58  | 6.78   | 7.33  | 8.46   | 4.79    | 7.02   | 6.15   |
| 25 | 8.89 | 7.76  | 6.69   | 7.49  | 8.65   | 4.2     | 6.97   | 6.35   |
| 26 | 8.72 | 7.65  | 6.8    | 7.42  | 8.56   | 4.65    | 7.15   | 6.55   |
| 27 | 8.51 | 6.62  | 6.47   | 7.23  | 8.82   | 4.33    | 6.53   | 5.56   |
| 28 | 8.75 | 6.76  | 6.3    | 7.54  | 8.6    | 3.59    | 6.94   | 5.38   |
| 29 | 8.76 | 6.96  | 6.38   | 7.35  | 8.5    | 4.11    | 6.88   | 5.88   |
| 30 | 9.05 | 7.18  | 6.96   | 6.86  | 8.2    | 4.56    | 6.47   | 6.37   |
| 31 | 8.73 | 7.51  | 7.27   | 6.53  | 8.4    | 4.91    | 6.17   | 6.98   |
| 32 | 8.88 | 7.4   | 7.45   | 7.24  | 7.79   | 5.36    | 6.28   | 6.86   |
| 33 | 8.7  | 7.45  | 7.47   | 6.78  | 8.18   | 5.05    | 6.33   | 6.54   |
| 34 | 9.27 | 7.61  | 7.73   | 6.41  | 7.64   | 5.61    | 5.41   | 7.08   |
| 35 | 9.19 | 7.82  | 7.63   | 6.91  | 7.63   | 4.77    | 6.56   | 7.37   |
| 36 | 8.94 | 7.71  | 7.19   | 7.08  | 8.82   | 3.97    | 6.87   | 5.94   |
| 37 | 9.12 | 8.02  | 7.57   | 7.28  | 8.81   | 3.61    | 6.67   | 5.76   |
| 38 | 9.25 | 8.1   | 7.38   | 6.96  | 8.62   | 4.17    | 6.47   | 5.93   |
| 39 | 8.66 | 7.35  | 5.77   | 6.4   | 6.73   | 3.25    | 5.9    | 5.35   |
| 40 | 8.55 | 7.07  | 5.99   | 6.7   | 7.53   | 4.16    | 6.36   | 5.43   |
| 41 | 8.58 | 6.94  | 6.15   | 6.52  | 7.24   | 3.69    | 6.2    | 5.95   |
| 42 | 8.37 | 7.13  | 6.22   | 6.67  | 7.29   | 4.7     | 6.53   | 5.65   |
| 43 | 8.64 | 7.21  | 7.13   | 6.28  | 7.04   | 5       | 5.49   | 6.24   |
| 44 | 8.59 | 7.44  | 7.17   | 6.37  | 6.95   | 5.22    | 4.94   | 6.18   |
| 45 | 8.42 | 7.5   | 7.11   | 6.93  | 6.88   | 5.86    | 5.08   | 5.89   |
| 46 | 8.25 | 7.73  | 6.91   | 6.5   | 7.21   | 4.9     | 5.94   | 5.84   |
| 47 | 10.1 | 7.5   | 6.03   | 6.18  | 5.86   | 2.86    | 4.86   | 3.86   |
| 48 | 8.62 | 6.96  | 6.34   | 6.58  | 7.62   | 3.77    | 6.1    | 6.02   |
| 49 | 8.59 | 7.13  | 6.73   | 6.7   | 7.41   | 3.7     | 6.34   | 5.73   |
| 50 | 8.3  | 6.83  | 6.36   | 6.79  | 7.7    | 3.27    | 6.41   | 6.15   |
| 51 | 8.94 | 8.65  | 6.74   | 7.43  | 8.61   | 3.96    | 7.06   | 6.16   |
| 52 | 8.65 | 8.41  | 6.74   | 7.78  | 8.54   | 5.01    | 7.18   | 6.12   |
| 53 | 8.82 | 8.44  | 6.4    | 7.46  | 8.81   | 4.2     | 6.99   | 6.52   |

<https://mc.manuscriptcentral.com/gut>

|    |       |      |      |      |      |      |      |      |
|----|-------|------|------|------|------|------|------|------|
| 1  |       |      |      |      |      |      |      |      |
| 2  | 8.79  | 8.31 | 6.65 | 7.64 | 8.69 | 4.4  | 7.32 | 6.4  |
| 3  | 9.73  | 6.96 | 7.6  | 7.57 | 8.33 | 4.94 | 6.8  | 6.54 |
| 4  | 9.67  | 6.88 | 7.43 | 8    | 8.45 | 5.05 | 6.58 | 6.51 |
| 5  | 9.52  | 7.18 | 7.49 | 7.98 | 8.35 | 5.28 | 6.75 | 6.18 |
| 6  | 9.57  | 7.12 | 7.42 | 7.65 | 8.36 | 5.14 | 6.74 | 6.67 |
| 7  | 8.84  | 7.43 | 7.15 | 7.14 | 8.29 | 6.57 | 7.3  | 6.66 |
| 8  | 9.08  | 7.55 | 6.55 | 7.79 | 8.71 | 6.33 | 7.33 | 5.74 |
| 9  | 9.17  | 7.4  | 6.53 | 7.74 | 8.81 | 4.91 | 7.47 | 5.82 |
| 10 | 9.14  | 7.77 | 6.37 | 7.5  | 8.59 | 5.14 | 7.67 | 5.72 |
| 11 | 8.72  | 7.42 | 7.63 | 7.71 | 8.23 | 4.17 | 6.6  | 6.25 |
| 12 | 8.8   | 7.77 | 7.65 | 7.8  | 8.37 | 4    | 6.98 | 6.59 |
| 13 | 8.68  | 7.62 | 7.6  | 7.97 | 8.47 | 4.4  | 6.82 | 6.14 |
| 14 | 8.6   | 7.5  | 7.42 | 7.84 | 8.26 | 4.5  | 7.03 | 6.58 |
| 15 | 9.4   | 7.15 | 5.15 | 8.15 | 7.47 | 5.15 | 5.15 | 8.96 |
| 16 | 10.02 | 8.19 | 7.16 | 6.98 | 6.11 | 4.11 | 4.88 | 8.45 |
| 17 | 9.76  | 7.98 | 7.61 | 7.09 | 7.16 | 5.36 | 5.54 | 7.65 |
| 18 | 10.79 | 9.36 | 9.11 | 7.23 | 7.55 | 5.83 | 1.24 | 9.53 |
| 19 | 10.75 | 9.33 | 8.49 | 6.42 | 7.65 | 5.86 | 2.36 | 9.19 |
| 20 | 9.01  | 7.3  | 7.12 | 7.08 | 8.48 | 5.57 | 6.66 | 6.41 |
| 21 | 9.14  | 7.23 | 6.8  | 7.33 | 8.52 | 5.62 | 6.58 | 6.34 |
| 22 | 9.24  | 7.43 | 7.35 | 7.16 | 8.23 | 5.32 | 6.2  | 6.72 |
| 23 | 8.84  | 7.62 | 7.08 | 8.09 | 8.87 | 6.23 | 7.01 | 7.4  |
| 24 | 8.82  | 7.84 | 7.05 | 7.91 | 8.94 | 6.85 | 6.86 | 7.41 |
| 25 | 9.43  | 7.83 | 7.86 | 7.71 | 8.66 | 7.57 | 6.41 | 7.68 |
| 26 | 9.2   | 8    | 7.31 | 7.7  | 8.99 | 4.81 | 7.72 | 6.66 |
| 27 | 9.11  | 7.85 | 7.29 | 7.98 | 9.21 | 4.36 | 7.44 | 6.43 |
| 28 | 9.1   | 8.02 | 6.69 | 7.79 | 9.31 | 4.78 | 7.36 | 6.78 |
| 29 | 9.42  | 7.51 | 7.8  | 7.83 | 8.28 | 5.17 | 6.57 | 6.99 |
| 30 | 9.31  | 7.66 | 8.01 | 8.14 | 8.38 | 4.68 | 6.82 | 6.97 |
| 31 | 9.55  | 7.55 | 8.02 | 7.79 | 8.23 | 5.36 | 6.06 | 7.24 |
| 32 | 9.16  | 7.91 | 7.48 | 7.85 | 8.55 | 5.73 | 6.37 | 7.03 |
| 33 | 9.23  | 7.77 | 7.33 | 7.81 | 8.39 | 5.33 | 6.56 | 7.12 |
| 34 | 9.31  | 8.05 | 7.63 | 7.78 | 8.14 | 5.38 | 6.06 | 7.14 |
| 35 | 9.37  | 8    | 7.48 | 7.25 | 7.86 | 5.22 | 6.09 | 6.84 |
| 36 | 9.46  | 7.99 | 7.39 | 7.17 | 7.94 | 4.92 | 5.9  | 6.95 |
| 37 | 9.28  | 7.93 | 7.53 | 7.03 | 7.86 | 4.68 | 5.7  | 7.17 |
| 38 | 9.43  | 7.72 | 7.49 | 6.85 | 7.85 | 5.19 | 6.05 | 7.54 |
| 39 | 9.43  | 7.72 | 7.49 | 6.85 | 7.85 | 5.19 | 6.05 | 7.54 |
| 40 | 9.56  | 8.13 | 7.39 | 7.06 | 8.03 | 5.19 | 5.64 | 7.43 |
| 41 | 9.47  | 8.09 | 7.53 | 6.95 | 8    | 5.64 | 5.67 | 7.18 |
| 42 | 9.34  | 8.07 | 7.32 | 7.04 | 8.03 | 5.15 | 5.95 | 7.49 |
| 43 | 9.21  | 7.82 | 7.86 | 7.43 | 7.74 | 6.08 | 5.51 | 7.28 |
| 44 | 9.27  | 7.81 | 7.73 | 7.13 | 8.24 | 5.66 | 5.91 | 6.93 |
| 45 | 9.2   | 7.77 | 7.87 | 7.44 | 8.02 | 5.44 | 6.34 | 6.63 |
| 46 | 9.52  | 7.98 | 8.08 | 7.42 | 7.93 | 5.66 | 5.31 | 7.49 |
| 47 | 8.89  | 7.87 | 6.52 | 7.49 | 8.33 | 3.43 | 6.37 | 5.53 |
| 48 | 8.75  | 7.83 | 6.4  | 7.54 | 8.49 | 3.88 | 6.52 | 5.63 |
| 49 | 9.14  | 8.25 | 6.78 | 6.73 | 7.81 | 4.1  | 6.16 | 5.8  |
| 50 | 8.99  | 7.46 | 7.75 | 6.94 | 7.71 | 5.4  | 5.86 | 7.57 |
| 51 | 9.01  | 7.69 | 7.77 | 7.05 | 7.62 | 5.1  | 5.9  | 7    |
| 52 | 8.88  | 7.54 | 7.58 | 7.41 | 7.65 | 5.59 | 5.41 | 7.39 |
| 53 | 8.74  | 8.37 | 7.81 | 7.41 | 7.51 | 5.82 | 5.26 | 6.79 |

<https://mc.manuscriptcentral.com/gut>

1  
2  
3  
4  
5  
6  
7  
8  
9  
10  
11  
12  
13  
14  
15  
16  
17  
18  
19  
20  
21  
22  
23  
24  
25  
26  
27  
28  
29  
30  
31  
32  
33  
34  
35  
36  
37  
38  
39  
40  
41  
42  
43  
44  
45  
46  
47  
48  
49  
50  
51  
52  
53  
54  
55  
56  
57  
58  
59  
60

|       |      |      |      |      |      |      |      |
|-------|------|------|------|------|------|------|------|
| 8.72  | 8.39 | 7.6  | 7.52 | 7.44 | 5.44 | 5.77 | 6.77 |
| 9.21  | 8.82 | 8.33 | 7.08 | 7.5  | 5.71 | 3.1  | 7.74 |
| 9.08  | 7.75 | 7.58 | 6.75 | 7.7  | 3.71 | 6.46 | 6.99 |
| 9.01  | 7.8  | 6.9  | 7.06 | 8    | 4.4  | 6.45 | 6.75 |
| 8.96  | 7.79 | 6.58 | 6.7  | 8.1  | 4.49 | 6.6  | 6.76 |
| 9.05  | 7.67 | 6.76 | 6.88 | 7.21 | 4.11 | 6.47 | 6.05 |
| 8.18  | 7.31 | 6.1  | 7.1  | 8.23 | 4.41 | 6.81 | 6.01 |
| 8.25  | 7.11 | 6.15 | 7.2  | 8.11 | 4.4  | 6.55 | 6.11 |
| 9.82  | 8.64 | 6.3  | 6.4  | 6.49 | 2.49 | 3.49 | 5.3  |
| 9.16  | 7.88 | 6.46 | 6.46 | 7.88 | 3.79 | 6.32 | 5.6  |
| 9.27  | 7.68 | 6.16 | 7.49 | 8.28 | 4.19 | 6.62 | 4.74 |
| 9.2   | 7.37 | 7.08 | 7.33 | 7.87 | 4.8  | 5.65 | 5.87 |
| 10.14 | 8.04 | 6.07 | 6.17 | 7.39 | 3.85 | 4.58 | 4.85 |
| 10.35 | 8.74 | 8.07 | 7.72 | 8.08 | 6.5  | 1.52 | 7.71 |
| 8.25  | 6.84 | 6.1  | 7.9  | 7.9  | 3.85 | 6.3  | 5.19 |
| 8.09  | 7.01 | 6.06 | 7.96 | 8.21 | 4.08 | 6.33 | 5.26 |
| 8.37  | 6.92 | 6.07 | 7.72 | 8.1  | 4.38 | 6.47 | 5.45 |
| 8.43  | 6.99 | 6.45 | 6.74 | 7.47 | 4.02 | 6.88 | 5.41 |
| 8.91  | 7.42 | 6.98 | 6.53 | 7.03 | 4.86 | 5.73 | 6.65 |
| 8.97  | 7.25 | 6.63 | 6.48 | 7.07 | 4.35 | 6.37 | 6.36 |
| 9.86  | 6.16 | 6.16 | 5.16 | 6.75 | 5.16 | 6.16 | 6.75 |
| 8.29  | 6.92 | 5.44 | 7.84 | 7.25 | 6.43 | 7.09 | 5.88 |
| 8.63  | 7.34 | 5.71 | 7.42 | 7.19 | 5.71 | 6.84 | 5.71 |
| 9.07  | 7.54 | 6.18 | 6.77 | 6.96 | 3.5  | 5.27 | 5.09 |
| 9.09  | 7.96 | 6.23 | 6.3  | 6.74 | 3.71 | 5.08 | 4.71 |
| 8.81  | 7.48 | 6.13 | 6.83 | 7.57 | 2.86 | 6.16 | 5.9  |
| 9.97  | 7.89 | 8.51 | 6.85 | 7    | 7.3  | 1    | 7.74 |
| 10.24 | 8.16 | 8.4  | 7.09 | 7.32 | 7.07 | 0.86 | 7.83 |
| 9.54  | 7.88 | 8.45 | 6.63 | 7.65 | 5.85 | 4.09 | 7.55 |
| 7.79  | 6.45 | 5.68 | 5.96 | 7.06 | 3.59 | 6.2  | 5.33 |
| 7.82  | 6.72 | 5.68 | 6.36 | 7.21 | 2.91 | 5.68 | 5.11 |
| 8.2   | 7.25 | 5.32 | 6.39 | 6.81 | 3.11 | 5.54 | 4.28 |
| 7.81  | 6.8  | 5.55 | 6.13 | 6.88 | 3.16 | 5.61 | 5.51 |
| 9.18  | 7.41 | 7.76 | 5.97 | 7.04 | 5.21 | 1.45 | 7.43 |
| 8.87  | 7.23 | 7.43 | 6.5  | 6.64 | 5.3  | 1.84 | 6.63 |
| 8.58  | 6.87 | 7.08 | 6.15 | 6.11 | 4.63 | 1.34 | 6.51 |
| 9.5   | 8.06 | 7.75 | 6.02 | 7.36 | 5.18 | 0    | 8.43 |
| 8.99  | 7.29 | 7.74 | 6.24 | 6.92 | 5.14 | 1.34 | 7.01 |
| 8.91  | 6.74 | 7.68 | 6.56 | 6.71 | 5.18 | 2.1  | 6.93 |
| 8.78  | 7.06 | 7.61 | 6.44 | 6.94 | 5.63 | 0.31 | 7    |
| 8.84  | 7.9  | 6.32 | 3.41 | 4.41 | 2.41 | 3.41 | 9.65 |
| 9.78  | 8.06 | 8.24 | 7.01 | 7.71 | 6.06 | 1.06 | 7.74 |
| 10.11 | 8.37 | 8.61 | 7.55 | 8.07 | 6.5  | 1.33 | 8.21 |
| 9.45  | 7.38 | 7.57 | 6.51 | 7.31 | 5.45 | 4.57 | 7.34 |
| 9.62  | 7.93 | 8.25 | 7.07 | 7.69 | 6.09 | 2.56 | 7.93 |
| 9.32  | 7.7  | 7.8  | 6.68 | 7.18 | 6.65 | 3.88 | 7.28 |
| 10.15 | 8.08 | 8.67 | 7.32 | 7.37 | 7.63 | 1.88 | 7.75 |
| 10.07 | 8.3  | 8.83 | 7.74 | 7.72 | 7.99 | 1.71 | 7.53 |
| 9.96  | 8.6  | 8.43 | 7.33 | 7.79 | 6.93 | 1.9  | 8.58 |
| 8.42  | 6.97 | 7.2  | 7.6  | 8.39 | 5.47 | 5.91 | 6.73 |
| 8.31  | 7.22 | 6.94 | 7.31 | 7.79 | 4.91 | 6.25 | 5.97 |
| 8.42  | 7.27 | 6.88 | 7.22 | 7.75 | 5.21 | 6.1  | 6.36 |

<https://mc.manuscriptcentral.com/gut>

|    |       |      |      |      |      |      |      |      |
|----|-------|------|------|------|------|------|------|------|
| 1  |       |      |      |      |      |      |      |      |
| 2  | 8.36  | 7.06 | 7.2  | 7.06 | 7.79 | 5.31 | 5.91 | 6.52 |
| 3  | 9.49  | 8.13 | 7.42 | 7.76 | 9.28 | 5.04 | 6.98 | 7.36 |
| 4  | 9.44  | 8.18 | 7.65 | 7.76 | 9.17 | 5.24 | 6.98 | 7.11 |
| 5  | 9.53  | 8.5  | 7.47 | 7.39 | 9.25 | 5.44 | 6.87 | 7.34 |
| 6  | 9.62  | 8.36 | 7.5  | 7.61 | 9.27 | 5.22 | 7.15 | 7.3  |
| 7  | 9.88  | 8.44 | 8.05 | 7.44 | 8.05 | 4.72 | 6.81 | 7.6  |
| 8  | 10.23 | 8.37 | 6.97 | 7.47 | 8.24 | 3.43 | 6.72 | 6.46 |
| 9  | 9.91  | 8.11 | 7.05 | 7.84 | 8.43 | 4.73 | 7.42 | 6.26 |
| 10 | 9.99  | 8.62 | 7.41 | 7.15 | 8.01 | 4.06 | 6.23 | 6.3  |
| 11 | 9.77  | 8.65 | 7.69 | 7.29 | 8.39 | 4.93 | 7.29 | 6.81 |
| 12 | 9.53  | 8.31 | 7.85 | 7.49 | 8.77 | 5.75 | 7.24 | 6.77 |
| 13 | 9.68  | 8.37 | 7.7  | 7.32 | 8.76 | 5.63 | 7.09 | 6.81 |
| 14 | 9.62  | 8.38 | 7.79 | 7.15 | 8.95 | 5.31 | 7.63 | 6.56 |
| 15 | 8.54  | 7.21 | 6.99 | 7.23 | 7.39 | 4.38 | 6.18 | 6.97 |
| 16 | 8.28  | 7.2  | 6.95 | 7.46 | 7.77 | 3.97 | 6.62 | 6.44 |
| 17 | 8.96  | 7.52 | 7.26 | 6.91 | 7.31 | 4.39 | 5.47 | 6.9  |
| 18 | 8.61  | 7.49 | 6.5  | 6.58 | 8.02 | 4.45 | 6.79 | 6.84 |
| 19 | 8.79  | 7.27 | 6.31 | 7.21 | 8.49 | 3.67 | 6.73 | 6.25 |
| 20 | 8.95  | 7.64 | 6.54 | 6.95 | 8.25 | 4.43 | 6.93 | 6.3  |
| 21 | 8.35  | 7.17 | 6.39 | 7.06 | 8.19 | 3.39 | 6.54 | 5.95 |
| 22 | 8.73  | 7.47 | 6.23 | 8    | 7.63 | 4.4  | 6.57 | 5.07 |
| 23 | 8.88  | 7.86 | 6.68 | 7.93 | 7.52 | 4.43 | 6.49 | 4.94 |
| 24 | 9.05  | 7.48 | 7.26 | 6.66 | 7.66 | 4.69 | 5.43 | 6.32 |
| 25 | 8.74  | 7.42 | 6.74 | 6.6  | 8.13 | 4.63 | 6.18 | 6.32 |
| 26 | 9.88  | 8.15 | 6.61 | 4.74 | 7.06 | 3.15 | 5.74 | 6.47 |
| 27 | 7.47  | 5.98 | 5.41 | 6.41 | 6.9  | 2.68 | 6.41 | 5.17 |
| 28 | 7.77  | 6.57 | 5.88 | 6.41 | 7.33 | 0.79 | 6.11 | 5.25 |
| 29 | 7.46  | 6.12 | 5.35 | 6.74 | 6.91 | 2.09 | 6.29 | 5.32 |
| 30 | 7.36  | 5.36 | 6.22 | 5.81 | 8.01 | 1.9  | 6.76 | 5.07 |
| 31 | 8.89  | 7.4  | 7.85 | 6.93 | 7.18 | 5.57 | 1.76 | 7.37 |
| 32 | 8.6   | 7.09 | 7.43 | 6.45 | 7.2  | 4.42 | 0.72 | 6.79 |
| 33 | 8.79  | 7.01 | 7.88 | 6.82 | 6.82 | 5.28 | 0.88 | 7.11 |
| 34 | 8.64  | 7.38 | 7.6  | 6.66 | 7.15 | 4.96 | 0.96 | 6.76 |
| 35 | 8.28  | 6.7  | 6.18 | 5.74 | 6.84 | 4    | 5.24 | 6.05 |
| 36 | 8.64  | 6.87 | 6.79 | 5.83 | 6.81 | 4.42 | 4.71 | 6.47 |
| 37 | 8.38  | 6.67 | 6.52 | 5.94 | 6.7  | 3.85 | 4.85 | 6.26 |
| 38 | 8.19  | 6.64 | 6.77 | 5.67 | 6.99 | 4.52 | 5.03 | 6.24 |
| 39 | 8.76  | 7.11 | 6.5  | 7    | 7.65 | 4.16 | 7.17 | 6.97 |
| 40 | 8.95  | 7.59 | 7.13 | 6.78 | 7.8  | 4.92 | 6.59 | 5.78 |
| 41 | 9.04  | 7.7  | 6.2  | 7.25 | 7.66 | 4.23 | 6.96 | 5.67 |
| 42 | 10.41 | 8.07 | 6.23 | 6.55 | 6.48 | 3.23 | 4.23 | 5.4  |
| 43 | 9.09  | 7.26 | 6.97 | 6.42 | 7.75 | 4.43 | 6.36 | 6.51 |
| 44 | 9.72  | 7.83 | 6.83 | 6.51 | 7.83 | 4.51 | 4.51 | 6.1  |
| 45 | 8.53  | 6.87 | 5.87 | 7.28 | 8.49 | 4.91 | 6.74 | 6.17 |
| 46 | 8.4   | 6.78 | 6.2  | 7.02 | 8.56 | 5.29 | 6.66 | 6.06 |
| 47 | 7.5   | 7.42 | 6.68 | 7.19 | 8.23 | 5.27 | 6.3  | 5.77 |
| 48 | 8.32  | 7.32 | 6.7  | 6.75 | 8.02 | 5.51 | 6.13 | 6.23 |
| 49 | 7.7   | 7.07 | 6.7  | 7.19 | 8.18 | 5.56 | 6.49 | 5.92 |
| 50 | 8.38  | 7.28 | 7.16 | 6.68 | 7.95 | 5.21 | 6.04 | 6.06 |
| 51 | 7.85  | 6.06 | 5.57 | 6.71 | 6.7  | 3.03 | 5.93 | 5.27 |
| 52 | 8.02  | 6.39 | 5.92 | 6.23 | 7.32 | 4.43 | 5.39 | 6.17 |
| 53 | 8.13  | 6.43 | 6.4  | 6.08 | 6.65 | 4.08 | 5.51 | 6.36 |

1  
2  
3  
4  
5  
6  
7  
8  
9  
10  
11  
12  
13  
14  
15  
16  
17  
18  
19  
20  
21  
22  
23  
24  
25  
26  
27  
28  
29  
30  
31  
32  
33  
34  
35  
36  
37  
38  
39  
40  
41  
42  
43  
44  
45  
46  
47  
48  
49  
50  
51  
52  
53  
54  
55  
56  
57  
58  
59  
60

|      |      |      |      |      |      |      |      |
|------|------|------|------|------|------|------|------|
| 8.03 | 6.4  | 6    | 5.49 | 7.15 | 3.79 | 5.92 | 5.25 |
| 7.96 | 5.91 | 6.1  | 5.56 | 6.62 | 2.68 | 4.91 | 5.49 |
| 7.95 | 6.2  | 5.94 | 6.05 | 7.24 | 3.39 | 5.39 | 5.17 |
| 7.83 | 5.88 | 5.57 | 5.95 | 7.09 | 3.49 | 5.85 | 5.49 |
| 9.27 | 7.01 | 6.88 | 5.25 | 6.98 | 4.88 | 2.55 | 6.51 |
| 7.69 | 6.27 | 5.4  | 6.65 | 7.35 | 2.37 | 5.97 | 4.21 |
| 7.71 | 6.02 | 5.13 | 6.67 | 6.69 | 3.71 | 5.8  | 4.53 |
| 7.75 | 5.92 | 5.02 | 6.82 | 6.89 | 3.35 | 5.83 | 4.78 |
| 9.21 | 7.49 | 7.92 | 6.9  | 7.55 | 5.56 | 1.27 | 7.29 |
| 8.77 | 7.1  | 7.32 | 6.49 | 7.1  | 5.15 | 4.77 | 6.98 |
| 8.57 | 7.05 | 6.39 | 6.33 | 7.87 | 4.11 | 6.31 | 6.46 |
| 8.8  | 7.25 | 6.17 | 6.47 | 7.66 | 4.47 | 6.1  | 6.47 |
| 8.54 | 7.28 | 6.14 | 6    | 7.79 | 3.76 | 5.83 | 6.35 |
| 8.51 | 7.06 | 6.26 | 6.35 | 7.67 | 3.59 | 5.83 | 6.76 |
| 9.76 | 7.94 | 5.13 | 5.87 | 4.87 | 3.54 | 4.13 | 4.13 |
| 8.59 | 7.27 | 5.97 | 6.31 | 7.74 | 2.8  | 5.84 | 6.09 |
| 8.51 | 6.88 | 6.78 | 6.55 | 7.52 | 4.32 | 5.54 | 6.5  |
| 8.77 | 7.55 | 5.82 | 6.35 | 7.43 | 3.84 | 5.43 | 5.86 |
