# Supplementary material for: Spatial profiling of gastric cancer patient-matched primary and locoregional metastases reveals principles of tumour dissemination
Source: PubMed Central journal article supplement — Gut. 2020 Nov 23;70(10):1823–32. doi: 10.1136/gutjnl-2020-320805 (PMC8458060; doi:10.1136/gutjnl-2020-320805), 2020-11-23
Supplement: gutjnl-2020-320805supp008.pdf [file gutjnl-2020-320805supp008.pdf]

| Gene     | pval     | qval     | Log2 Fold Change |
|----------|----------|----------|------------------|
| AAMP     | 0.181935 | 0.266838 | 0.12             |
| ABI3BP   | 2.34E-07 | 8.84E-06 | -0.87            |
| ACHE     | 0.17426  | 0.25975  | -0.15            |
| ACTG2    | 0.000291 | 0.001535 | -0.99            |
| ACVR1    | 0.191165 | 0.277788 | 0.1              |
| ACVR1C   | 0.494418 | 0.592071 | -0.05            |
| ACVRL1   | 0.455391 | 0.558403 | 0.06             |
| ADAM15   | 0.933512 | 0.948291 | 0.12             |
| ADAM17   | 6.56E-06 | 8.11E-05 | -0.19            |
| ADAM28   | 0.137332 | 0.218935 | 0.06             |
| ADAM8    | 0.236456 | 0.332246 | -0.18            |
| ADAM9    | 0.002501 | 0.009028 | 0.22             |
| ADAMTS1  | 1.16E-05 | 0.000117 | -0.46            |
| ADAMTS12 | 0.2677   | 0.364186 | -0.06            |
| ADAMTS8  | 0.013325 | 0.033751 | -0.51            |
| ADAP1    | 0.460361 | 0.563558 | 0.04             |
| ADD1     | 0.152674 | 0.234182 | 0.08             |
| ADM2     | 0.238503 | 0.333904 | 0.16             |
| ADRA2B   | 0.243419 | 0.338327 | -0.18            |
| AEBP1    | 0.003982 | 0.012885 | -0.24            |
| AGGF1    | 0.038265 | 0.080503 | -0.14            |
| AGR2     | 5.48E-09 | 8.27E-07 | 1.15             |
| AGRN     | 0.627908 | 0.706856 | 0.02             |
| AGT      | 0.005904 | 0.017419 | 0.35             |
| AHNAK    | 0.04217  | 0.08682  | -0.15            |
| AKAP12   | 4.92E-06 | 6.89E-05 | -0.65            |
| AKAP2    | 0.004912 | 0.015194 | -0.22            |
| AKT1     | 0.711782 | 0.775214 | 0.01             |
| AKT2     | 0.267681 | 0.364186 | -0.05            |
| AKT3     | 0.077086 | 0.138359 | -0.18            |
| ALB      | 0.915548 | 0.934976 | 1.00E-18         |
| ALDOA    | 0.069511 | 0.127133 | 0.09             |
| ALOX5    | 0.051097 | 0.101143 | -0.15            |
| AMH      | 0.711787 | 0.775214 | -0.05            |
| ANG      | 0.151518 | 0.234021 | 0.05             |
| ANGPT1   | 0.015045 | 0.037734 | -0.14            |
| ANGPT2   | 0.802368 | 0.856898 | 0.09             |
| ANGPTL2  | 0.000586 | 0.002684 | -0.37            |
| ANGPTL4  | 0.827043 | 0.873558 | -0.08            |
| ANPEP    | 0.120351 | 0.195921 | 0.28             |
| ANXA2P2  | 0.697028 | 0.765637 | 0.06             |
| AP1M2    | 2.54E-05 | 0.000225 | 0.47             |
| APC      | 0.499441 | 0.593476 | 0.03             |
| APOD     | 1.14E-07 | 5.18E-06 | -0.95            |
| APOE     | 8.82E-05 | 0.000575 | -0.53            |
| APOH     | 0.301652 | 0.400469 | -0.14            |

|          |          |          |          |
|----------|----------|----------|----------|
| AQP1     | 2.59E-07 | 8.97E-06 | -0.34    |
| ARAP2    | 0.037142 | 0.07857  | 0.17     |
| AREG     | 0.002793 | 0.009689 | 0.29     |
| ARHGAP32 | 0.004108 | 0.013236 | 0.22     |
| ARHGDIB  | 0.001087 | 0.004524 | -0.28    |
| ASPN     | 0.04566  | 0.093012 | -0.47    |
| ATPIF1   | 3.41E-05 | 0.000279 | 0.32     |
| B3GNT3   | 0.001011 | 0.004325 | 0.24     |
| BAD      | 0.048625 | 0.097575 | -0.07    |
| BAG2     | 0.011003 | 0.029015 | -0.28    |
| BAI1     | 0.030021 | 0.066046 | -0.38    |
| BAI3     | 0.002719 | 0.009561 | -0.38    |
| BCAS1    | 0.178068 | 0.263677 | 0.08     |
| BGN      | 2.47E-06 | 4.04E-05 | -0.74    |
| BICC1    | 0.13945  | 0.220485 | -0.2     |
| BMP4     | 0.041825 | 0.086341 | 0.16     |
| BMP5     | 0.725769 | 0.784735 | -0.03    |
| BMP7     | 0.00012  | 0.000735 | 0.48     |
| BMPER    | 0.018882 | 0.044737 | -0.38    |
| BMPR1A   | 1.65E-06 | 3.17E-05 | -0.28    |
| BMPR1B   | 0.000207 | 0.00113  | -0.45    |
| BMPR2    | 0.174404 | 0.25975  | -0.09    |
| BNC2     | 7.56E-06 | 8.82E-05 | -0.5     |
| BRMS1    | 0.024794 | 0.056151 | 0.14     |
| BTG1     | 0.18004  | 0.264562 | -0.01    |
| C1S      | 0.041148 | 0.085401 | -0.22    |
| C3       | 0.061882 | 0.116788 | -0.2     |
| C3AR1    | 0.000359 | 0.001816 | -0.22    |
| CADM1    | 0.024793 | 0.056151 | -0.18    |
| CALCRL   | 0.198394 | 0.28769  | -0.06    |
| CALD1    | 0.053197 | 0.104228 | -0.2     |
| CAMK2A   | 0.328433 | 0.427907 | -0.14    |
| CAMK2B   | 0.577407 | 0.662598 | 1.00E-18 |
| CAMK2D   | 0.059143 | 0.113035 | -0.19    |
| CAMP     | 0.331697 | 0.430703 | -0.23    |
| CASP8    | 0.009814 | 0.026609 | -0.14    |
| CAV1     | 0.065865 | 0.122206 | -0.19    |
| CBLC     | 0.027188 | 0.060839 | 0.28     |
| CCBE1    | 0.090576 | 0.159595 | -0.27    |
| CCDC80   | 5.75E-09 | 8.27E-07 | -1.08    |
| CCL11    | 0.001893 | 0.007251 | 0.41     |
| CCL21    | 0.001818 | 0.006998 | -0.54    |
| CCL5     | 0.01016  | 0.027259 | -0.36    |
| CCL7     | 0.058628 | 0.112577 | -0.29    |
| CCL8     | 0.115682 | 0.19156  | -0.2     |
| CCR2     | 0.006517 | 0.018937 | -0.2     |
| CCR3     | 0.543311 | 0.631948 | -0.07    |

|         |          |          |       |
|---------|----------|----------|-------|
| CD163   | 3.47E-05 | 0.000279 | -0.39 |
| CD24    | 1.43E-08 | 1.10E-06 | 0.56  |
| CD2AP   | 0.101668 | 0.173199 | 0.12  |
| CD34    | 0.000371 | 0.001868 | -0.3  |
| CD36    | 0.000112 | 0.000691 | -0.44 |
| CD44    | 0.206084 | 0.29772  | -0.07 |
| CD46    | 0.001462 | 0.005862 | 0.2   |
| CD82    | 0.662104 | 0.73357  | 0.04  |
| CDC42   | 0.000418 | 0.002052 | 0.12  |
| CDH1    | 4.13E-05 | 0.000318 | 0.3   |
| CDH11   | 9.42E-05 | 0.000609 | -0.37 |
| CDH13   | 0.344391 | 0.443447 | 0.04  |
| CDH2    | 1.07E-06 | 2.38E-05 | -0.86 |
| CDK14   | 0.000191 | 0.001052 | -0.3  |
| CDKN1A  | 0.092863 | 0.162142 | -0.07 |
| CDKN2A  | 0.406369 | 0.508787 | -0.11 |
| CDS1    | 0.004389 | 0.01385  | 0.21  |
| CEACAM1 | 0.138056 | 0.219182 | 0.07  |
| CEACAM5 | 7.15E-06 | 8.47E-05 | 0.63  |
| CEACAM6 | 0.003201 | 0.010813 | 0.33  |
| CEP170  | 0.10167  | 0.173199 | -0.2  |
| CEP295  | 0.007828 | 0.021759 | 0.14  |
| CFP     | 0.10024  | 0.171521 | -0.2  |
| CGN     | 0.501965 | 0.593724 | 0.13  |
| CHAD    | 0.602774 | 0.687503 | -0.18 |
| CHD4    | 0.005615 | 0.016917 | 0.12  |
| CHI3L1  | 0.630735 | 0.709001 | -0.13 |
| CHP1    | 0.110259 | 0.184966 | -0.1  |
| CHP2    | 0.269423 | 0.365883 | 0.12  |
| CHRD1   | 4.27E-09 | 8.27E-07 | -1.07 |
| CHRNA7  | 0.636396 | 0.713282 | -0.12 |
| CIB1    | 0.005139 | 0.015827 | 0.08  |
| CKMT1A  | 0.930354 | 0.946331 | -0.06 |
| CLDN1   | 0.902614 | 0.924221 | 0.05  |
| CLDN3   | 0.984152 | 0.989291 | -0.06 |
| CLDN4   | 0.419981 | 0.523277 | 0.16  |
| CLDN7   | 0.073826 | 0.134387 | 0.18  |
| CLEC2B  | 0.000949 | 0.004081 | -0.3  |
| CLEC3B  | 0.011259 | 0.029289 | -0.27 |
| CLIC4   | 0.053701 | 0.104683 | -0.15 |
| CLU     | 1.02E-05 | 0.000109 | -0.52 |
| CMA1    | 1.19E-06 | 2.47E-05 | -1.07 |
| CNN1    | 3.36E-05 | 0.000278 | -1.55 |
| COL18A1 | 0.892553 | 0.921657 | 0.04  |
| COL1A1  | 0.005832 | 0.017273 | -0.49 |
| COL1A2  | 0.005766 | 0.017143 | -0.58 |
| COL3A1  | 0.068898 | 0.126312 | -0.23 |

|          |          |          |       |
|----------|----------|----------|-------|
| COL4A1   | 0.25588  | 0.351208 | -0.16 |
| COL4A2   | 0.047884 | 0.096774 | -0.25 |
| COL4A6   | 0.027465 | 0.061121 | -0.42 |
| COL5A1   | 0.310666 | 0.411018 | -0.07 |
| COL5A2   | 0.036649 | 0.07774  | -0.15 |
| COL6A1   | 0.294535 | 0.393736 | -0.13 |
| COL6A2   | 0.006502 | 0.018937 | -0.32 |
| COL6A3   | 0.003284 | 0.010996 | -0.41 |
| COL7A1   | 0.000144 | 0.000832 | 0.78  |
| COMP     | 0.000556 | 0.002579 | -0.65 |
| CREBBP   | 0.230485 | 0.327441 | -0.09 |
| CRIP2    | 0.105046 | 0.17777  | -0.17 |
| CRISPLD2 | 0.000177 | 0.000979 | -0.27 |
| CSF2RB   | 0.218124 | 0.312185 | -0.15 |
| CSPG4    | 0.00025  | 0.001326 | -0.37 |
| CST7     | 0.000376 | 0.001878 | -0.22 |
| CTNNB1   | 0.060226 | 0.114786 | 0.08  |
| CTNND1   | 0.469657 | 0.570415 | 0.06  |
| CTSG     | 0.000481 | 0.002299 | -0.58 |
| CTSH     | 0.012884 | 0.033069 | 0.17  |
| CTSK     | 0.005624 | 0.016917 | -0.21 |
| CTSL     | 0.438526 | 0.54027  | 0.07  |
| CUL1     | 0.532598 | 0.623265 | 0.05  |
| CX3CL1   | 0.501966 | 0.593724 | 0.07  |
| CXADR    | 0.051583 | 0.101583 | 0.21  |
| CXCL10   | 0.371398 | 0.470018 | -0.03 |
| CXCL11   | 0.030016 | 0.066046 | -0.34 |
| CXCL12   | 7.12E-09 | 8.27E-07 | -0.69 |
| CXCL13   | 0.296116 | 0.395163 | -0.29 |
| CXCL17   | 0.048336 | 0.097432 | 0.17  |
| CXCL8    | 0.00025  | 0.001326 | 0.87  |
| CXCR2    | 0.961978 | 0.972078 | 0.02  |
| CXCR3    | 0.000166 | 0.000932 | -0.28 |
| CXCR4    | 0.040762 | 0.084828 | -0.18 |
| CYB561   | 0.964214 | 0.972724 | 0.06  |
| CYBB     | 0.117519 | 0.192963 | -0.12 |
| CYP1B1   | 1.12E-09 | 8.27E-07 | -1.06 |
| DAG1     | 0.889707 | 0.920799 | 0.06  |
| DCC      | 0.390442 | 0.492853 | -0.06 |
| DCN      | 0.008947 | 0.024603 | -0.18 |
| DDR2     | 0.000133 | 0.000797 | -0.46 |
| DENND5A  | 3.30E-05 | 0.000276 | -0.29 |
| DENR     | 1.79E-05 | 0.000168 | 0.3   |
| DESI1    | 7.98E-05 | 0.000544 | 0.22  |
| DICER1   | 0.065844 | 0.122206 | -0.07 |
| DLC1     | 3.10E-06 | 4.82E-05 | -0.38 |
| DLG1     | 0.99349  | 0.996077 | 0.01  |

|          |          |          |          |
|----------|----------|----------|----------|
| DLL4     | 0.01606  | 0.039891 | -0.21    |
| DPT      | 6.64E-06 | 8.11E-05 | -0.65    |
| DPYSL3   | 8.59E-09 | 8.27E-07 | -0.82    |
| DSC2     | 0.717717 | 0.779467 | -0.03    |
| DST      | 0.007701 | 0.021483 | -0.18    |
| ECM1     | 0.051406 | 0.101495 | -0.2     |
| ECM2     | 1.94E-06 | 3.56E-05 | -0.44    |
| ECSCR    | 0.233327 | 0.329077 | -0.16    |
| EDN1     | 0.009927 | 0.02682  | -0.19    |
| EGF      | 0.902616 | 0.924221 | -0.01    |
| EGFL7    | 1.15E-05 | 0.000117 | -0.32    |
| EGFR     | 0.083252 | 0.148388 | -0.1     |
| EGLN2    | 0.435922 | 0.53881  | 1.00E-18 |
| EGLN3    | 0.42688  | 0.530157 | -0.04    |
| EIF2AK3  | 0.267254 | 0.364186 | -0.07    |
| EIF4E2   | 0.48191  | 0.580749 | 0.04     |
| EIF4EBP1 | 0.016417 | 0.040516 | 0.18     |
| ELF3     | 0.005421 | 0.016499 | 0.25     |
| ELK3     | 0.000101 | 0.000629 | -0.26    |
| EMCN     | 0.024352 | 0.055642 | -0.2     |
| EMILIN1  | 6.64E-05 | 0.000482 | -0.51    |
| EMILIN3  | 0.62229  | 0.703618 | 0.14     |
| EMP3     | 0.000788 | 0.003488 | -0.28    |
| ENO1     | 0.013295 | 0.033751 | 0.2      |
| ENO2     | 0.002793 | 0.009689 | -0.29    |
| ENO3     | 4.28E-05 | 0.000323 | -0.26    |
| ENPEP    | 0.121301 | 0.197051 | -0.18    |
| ENPP2    | 0.17174  | 0.258786 | -0.14    |
| EP300    | 0.094604 | 0.164066 | 0.08     |
| EPAS1    | 0.017896 | 0.042935 | 0.13     |
| EPCAM    | 0.03225  | 0.069172 | 0.31     |
| EPHA1    | 0.281591 | 0.377743 | 0.06     |
| EPHA2    | 0.007414 | 0.020912 | 0.26     |
| EPHB1    | 0.118261 | 0.193341 | -0.22    |
| EPHB3    | 0.647809 | 0.723048 | 0.01     |
| EPHB4    | 0.238501 | 0.333904 | -0.05    |
| EPN3     | 0.662119 | 0.73357  | -0.05    |
| EPS8L1   | 0.168031 | 0.253709 | 0.24     |
| ERBB2    | 0.495789 | 0.592791 | -0.04    |
| ERBB2IP  | 0.725745 | 0.784735 | 0.01     |
| ERBB3    | 0.157271 | 0.2398   | 0.06     |
| EREG     | 0.009159 | 0.02501  | 0.33     |
| ERMP1    | 0.000532 | 0.002496 | 0.23     |
| ESRP1    | 0.045653 | 0.093012 | 0.17     |
| ETV4     | 0.472103 | 0.572471 | 0.01     |
| EVI2A    | 0.030376 | 0.066262 | -0.28    |
| EVPL     | 0.342387 | 0.441604 | 0.09     |

|         |          |          |          |
|---------|----------|----------|----------|
| F11R    | 0.009372 | 0.025499 | 0.2      |
| F3      | 0.000472 | 0.002273 | 0.49     |
| FAM174B | 0.75347  | 0.808039 | 1.00E-18 |
| FAP     | 0.017894 | 0.042935 | -0.16    |
| FASLG   | 0.095215 | 0.164754 | -0.22    |
| FBLN1   | 1.86E-06 | 3.50E-05 | -0.65    |
| FBLN5   | 0.024539 | 0.055903 | -0.2     |
| FBN1    | 0.000744 | 0.003311 | -0.45    |
| FBN2    | 0.928503 | 0.945697 | -0.06    |
| FBP1    | 0.012996 | 0.033245 | 0.12     |
| FERMT2  | 7.02E-06 | 8.45E-05 | -0.41    |
| FGF18   | 0.001124 | 0.004652 | -0.63    |
| FGF2    | 0.022118 | 0.051299 | -0.3     |
| FGF9    | 0.02429  | 0.055642 | -0.36    |
| FGFR1   | 2.27E-06 | 3.97E-05 | -0.45    |
| FGFR2   | 0.244163 | 0.338749 | -0.01    |
| FGFR3   | 0.633213 | 0.710749 | 0.08     |
| FGFR4   | 0.543303 | 0.631948 | 0.04     |
| FGL2    | 2.59E-05 | 0.000226 | -0.41    |
| FHL1    | 2.41E-07 | 8.84E-06 | -0.8     |
| FIGF    | 0.438531 | 0.54027  | -0.17    |
| FLI1    | 0.031304 | 0.067708 | -0.22    |
| FLT1    | 0.627421 | 0.706856 | 0.05     |
| FLT4    | 0.500962 | 0.593724 | -0.01    |
| FMOD    | 0.074459 | 0.134602 | -0.07    |
| FN1     | 0.067637 | 0.124297 | -0.4     |
| FOXC2   | 0.047    | 0.095236 | -0.24    |
| FOXO4   | 0.000508 | 0.002401 | -0.29    |
| FRAS1   | 0.179349 | 0.264062 | -0.13    |
| FREM1   | 0.000535 | 0.002496 | -0.41    |
| FREM2   | 0.845657 | 0.889557 | -0.1     |
| FST     | 0.126137 | 0.203192 | -0.16    |
| FSTL1   | 0.007327 | 0.020743 | -0.24    |
| FUT3    | 0.013624 | 0.034394 | 0.24     |
| FXYD6   | 8.35E-08 | 4.20E-06 | -0.62    |
| GALNT7  | 4.90E-05 | 0.000359 | 0.41     |
| GATA4   | 0.367143 | 0.466502 | 0.07     |
| GDF15   | 0.647926 | 0.723048 | 0.04     |
| GDF5    | 0.64777  | 0.723048 | -0.03    |
| GDF6    | 0.054509 | 0.105989 | -0.57    |
| GIMAP4  | 3.93E-05 | 0.000309 | -0.39    |
| GIMAP6  | 0.010513 | 0.028109 | -0.2     |
| GJA5    | 0.105046 | 0.17777  | -0.14    |
| GLYR1   | 0.002023 | 0.007635 | 0.15     |
| GPI     | 0.026098 | 0.058759 | 0.15     |
| GPR124  | 0.168041 | 0.253709 | -0.19    |
| GPR56   | 0.005225 | 0.016028 | 0.12     |

|          |          |          |          |
|----------|----------|----------|----------|
| GPX1     | 0.316757 | 0.416235 | -0.02    |
| GREM1    | 0.720664 | 0.781566 | -0.06    |
| GRHL2    | 0.883423 | 0.915526 | 1.00E-18 |
| GSN      | 0.000295 | 0.001548 | -0.26    |
| GTF2I    | 0.147641 | 0.230476 | 0.07     |
| GZMK     | 6.51E-06 | 8.11E-05 | -0.59    |
| HAPLN1   | 1.40E-05 | 0.000138 | 0.55     |
| HAS1     | 0.003973 | 0.012885 | -0.26    |
| HDAC5    | 2.37E-06 | 3.97E-05 | -0.27    |
| HDHD3    | 0.067031 | 0.123969 | 0.12     |
| HEG1     | 0.000135 | 0.000798 | -0.26    |
| HGF      | 0.616668 | 0.698296 | -0.17    |
| HIF1A    | 0.061182 | 0.116035 | 0.12     |
| HIPK1    | 0.075108 | 0.135441 | 0.05     |
| HIPK2    | 0.105397 | 0.177972 | 0.12     |
| HK2      | 0.027183 | 0.060839 | 0.2      |
| HK3      | 0.006121 | 0.017921 | -0.22    |
| HKDC1    | 0.435946 | 0.53881  | 0.05     |
| HLADPB1  | 0.917732 | 0.935965 | 0.02     |
| HMOX1    | 0.000884 | 0.003823 | -0.23    |
| HOXA5    | 0.010636 | 0.028338 | -0.27    |
| HOXA7    | 0.905134 | 0.925569 | -0.09    |
| HOXB13   | 0.243419 | 0.338327 | 0.15     |
| HOXB3    | 0.000582 | 0.002683 | -0.23    |
| HPSE     | 0.336358 | 0.435287 | -0.06    |
| HRAS     | 0.034216 | 0.072982 | 0.18     |
| HSD17B12 | 0.005685 | 0.017033 | 0.13     |
| HSP90B1  | 0.033587 | 0.071838 | 0.15     |
| HSPB1    | 0.02259  | 0.052235 | -0.28    |
| HSPG2    | 0.12034  | 0.195921 | -0.05    |
| HUNK     | 0.625094 | 0.705751 | -0.05    |
| IBSP     | 0.020994 | 0.049134 | -0.28    |
| ICAM1    | 0.87061  | 0.905905 | -0.03    |
| ID1      | 6.87E-05 | 0.000495 | 0.5      |
| ID2      | 0.352411 | 0.451508 | -0.06    |
| ID4      | 1.95E-05 | 0.000179 | -0.44    |
| IFNG     | 0.40309  | 0.505504 | -0.13    |
| IGF1     | 2.37E-07 | 8.84E-06 | -0.88    |
| IGFBP4   | 8.53E-05 | 0.000566 | -0.55    |
| IGFBP7   | 0.000811 | 0.003568 | -0.29    |
| IL10RA   | 6.39E-06 | 8.11E-05 | -0.38    |
| IL11     | 6.52E-06 | 8.11E-05 | 1.21     |
| IL13RA2  | 0.117527 | 0.192963 | 0.18     |
| IL15     | 0.002925 | 0.0101   | -0.18    |
| IL18     | 0.191205 | 0.277788 | -0.07    |
| IL1A     | 0.048788 | 0.097575 | 0.33     |
| IL1B     | 7.35E-05 | 0.000514 | 0.75     |

|          |          |          |          |
|----------|----------|----------|----------|
| IL1RL1   | 0.086853 | 0.154093 | 0.15     |
| IL1RN    | 0.003284 | 0.010996 | 0.29     |
| IL6      | 0.812996 | 0.863458 | -0.09    |
| ILK      | 0.530205 | 0.622344 | -0.14    |
| INHBA    | 0.001996 | 0.00761  | -0.44    |
| INHBE    | 0.299802 | 0.39939  | -0.2     |
| IRF6     | 0.001365 | 0.00556  | 0.13     |
| ISL1     | 0.018137 | 0.043372 | -0.26    |
| ISLR     | 6.22E-08 | 3.69E-06 | -0.65    |
| ITGA1    | 0.341952 | 0.441604 | -0.04    |
| ITGA11   | 0.27813  | 0.373753 | -0.18    |
| ITGA2    | 0.000161 | 0.000909 | 0.31     |
| ITGA3    | 0.054715 | 0.106123 | 0.14     |
| ITGA5    | 0.507045 | 0.598811 | -0.07    |
| ITGA6    | 0.002023 | 0.007635 | 0.17     |
| ITGA7    | 1.22E-07 | 5.23E-06 | -0.53    |
| ITGA8    | 0.391707 | 0.49364  | -0.16    |
| ITGA9    | 0.003983 | 0.012885 | -0.2     |
| ITGAM    | 0.012674 | 0.032639 | -0.15    |
| ITGB1    | 0.123148 | 0.19921  | -0.09    |
| ITGB1BP1 | 0.474556 | 0.573639 | -0.1     |
| ITGB2    | 0.000837 | 0.00366  | -0.28    |
| ITGB3    | 0.744592 | 0.800749 | 0.02     |
| ITGB4    | 0.174248 | 0.25975  | 0.11     |
| ITGB6    | 0.179356 | 0.264062 | 0.14     |
| ITGB7    | 0.467225 | 0.569979 | 0.14     |
| ITGB8    | 0.481946 | 0.580749 | -0.04    |
| ITM2A    | 0.179353 | 0.264062 | -0.21    |
| JAG1     | 0.031616 | 0.06819  | 0.22     |
| JAM2     | 1.55E-06 | 3.06E-05 | -0.47    |
| JAM3     | 3.13E-06 | 4.82E-05 | -0.36    |
| JUN      | 0.996746 | 0.998042 | 0.01     |
| KCNJ8    | 3.66E-05 | 0.000291 | -0.4     |
| KDM1A    | 0.038463 | 0.080698 | 0.11     |
| KDR      | 0.031922 | 0.068659 | 0.18     |
| KIAA1462 | 6.51E-06 | 8.11E-05 | -0.55    |
| KISS1    | 0.254227 | 0.349562 | -0.23    |
| KLK3     | 0.828859 | 0.874276 | 1.00E-18 |
| KRAS     | 0.097592 | 0.167736 | 0.1      |
| KRIT1    | 0.209347 | 0.301303 | 0.05     |
| KRT1     | 0.003202 | 0.010813 | -0.54    |
| KRT14    | 0.095441 | 0.164775 | 0.25     |
| KRT19    | 0.002705 | 0.009554 | 0.29     |
| KRT7     | 0.050261 | 0.100003 | -0.21    |
| LAD1     | 0.599997 | 0.685457 | 0.14     |
| LAMA1    | 0.152266 | 0.234021 | -0.16    |
| LAMA3    | 0.063558 | 0.118786 | 0.16     |



|          |          |          |       |
|----------|----------|----------|-------|
| LAMA4    | 8.11E-05 | 0.000544 | -0.33 |
| LAMA5    | 0.030373 | 0.066262 | -0.19 |
| LAMB3    | 2.06E-05 | 0.000186 | 0.37  |
| LAMC1    | 0.091301 | 0.160207 | -0.04 |
| LAMC2    | 0.235281 | 0.331199 | 0.13  |
| LDHA     | 0.017706 | 0.042935 | 0.11  |
| LEFTY1   | 0.532608 | 0.623265 | 0.06  |
| LGALS1   | 0.316771 | 0.416235 | -0.03 |
| LHFP     | 1.22E-08 | 1.04E-06 | -0.61 |
| LIFR     | 2.37E-05 | 0.000212 | -0.34 |
| LLGL2    | 0.354607 | 0.453567 | 0.1   |
| LOX      | 0.314848 | 0.415126 | -0.12 |
| LOXL2    | 0.001708 | 0.006678 | -0.25 |
| LRG1     | 0.148163 | 0.230476 | 0.17  |
| LTBP4    | 0.057562 | 0.111085 | -0.13 |
| LUM      | 0.271142 | 0.366923 | -0.05 |
| LY96     | 0.003025 | 0.010354 | -0.27 |
| MAF      | 2.32E-06 | 3.97E-05 | -0.57 |
| MAP2K1   | 0.070975 | 0.129503 | 0.09  |
| MAP2K2   | 0.041823 | 0.086341 | -0.07 |
| MAP2K4   | 0.543284 | 0.631948 | -0.03 |
| MAP3K7   | 0.676566 | 0.746167 | -0.03 |
| MAPK1    | 0.018676 | 0.044522 | 0.12  |
| MAPK3    | 0.019489 | 0.045752 | 0.21  |
| MAPKAPK3 | 0.803515 | 0.856934 | -0.02 |
| MCAM     | 8.12E-05 | 0.000544 | -0.17 |
| MED1     | 0.050261 | 0.100003 | 0.11  |
| MED23    | 0.000631 | 0.002825 | 0.19  |
| MEG3     | 1.33E-05 | 0.000133 | -0.52 |
| MEOX2    | 9.86E-07 | 2.30E-05 | -0.75 |
| MET      | 0.040761 | 0.084828 | 0.16  |
| MFAP4    | 0.000231 | 0.001252 | -0.44 |
| MGAT5    | 0.001606 | 0.006343 | 0.14  |
| MGP      | 1.11E-05 | 0.000117 | -0.88 |
| MISP     | 0.228689 | 0.325491 | 0.04  |
| MMP1     | 0.001048 | 0.004432 | 0.71  |
| MMP10    | 2.66E-06 | 4.26E-05 | 1.18  |
| MMP12    | 9.10E-07 | 2.19E-05 | 1.48  |
| MMP13    | 0.861239 | 0.901025 | 0.02  |
| MMP14    | 0.898842 | 0.924221 | -0.02 |
| MMP17    | 0.009159 | 0.02501  | -0.2  |
| MMP2     | 0.942993 | 0.95666  | 0.04  |
| MMP24    | 0.611107 | 0.694031 | -0.27 |
| MMP3     | 6.84E-07 | 1.82E-05 | 1.43  |
| MMP9     | 0.206473 | 0.297723 | -0.12 |
| MMRN2    | 0.002102 | 0.007859 | -0.21 |
| MPDZ     | 4.25E-07 | 1.26E-05 | -0.42 |

|        |          |          |       |
|--------|----------|----------|-------|
| MRC1   | 0.011131 | 0.029253 | -0.32 |
| MS4A4A | 0.000459 | 0.00222  | -0.27 |
| MS4A6A | 0.246725 | 0.341688 | -0.08 |
| MT3    | 0.067136 | 0.123969 | -0.22 |
| MTA1   | 0.147033 | 0.230112 | -0.07 |
| MTBP   | 0.133168 | 0.213623 | -0.08 |
| MTDH   | 0.134427 | 0.214762 | 0.08  |
| MTOR   | 0.239601 | 0.334833 | -0.01 |
| MUC1   | 7.93E-05 | 0.000544 | 0.46  |
| MYC    | 0.1085   | 0.182551 | -0.07 |
| MYCL   | 0.371742 | 0.470018 | -0.05 |
| MYH11  | 2.73E-05 | 0.000233 | -1.07 |
| MYLK   | 2.36E-06 | 3.97E-05 | -0.89 |
| MYO1D  | 0.148142 | 0.230476 | 0.13  |
| MYO5C  | 0.176771 | 0.262767 | 0.07  |
| NAA15  | 0.812988 | 0.863458 | 0.04  |
| NAP1L3 | 9.81E-05 | 0.000624 | -0.29 |
| NCAM1  | 0.00418  | 0.013342 | -0.41 |
| NCL    | 1.49E-05 | 0.000143 | 0.29  |
| NDNF   | 1        | 1        | 0.01  |
| NDP    | 0.901987 | 0.924221 | -0.04 |
| NDRG1  | 0.462374 | 0.565124 | 0.02  |
| NF1    | 0.870044 | 0.905905 | 0.03  |
| NF2    | 0.151911 | 0.234021 | -0.03 |
| NFAT5  | 0.111133 | 0.185624 | -0.03 |
| NFATC2 | 0.000309 | 0.001589 | -0.3  |
| NFKB1  | 0.031268 | 0.067708 | 0.14  |
| NID2   | 0.04276  | 0.087568 | -0.29 |
| NME1   | 5.32E-06 | 7.32E-05 | 0.37  |
| NME4   | 0.097959 | 0.167993 | -0.04 |
| NODAL  | 0.876873 | 0.91119  | 0.06  |
| NOS2   | 0.010045 | 0.027045 | 0.34  |
| NOS3   | 0.010797 | 0.028668 | -0.17 |
| NOTCH1 | 0.001422 | 0.005734 | -0.24 |
| NOX5   | 0.790112 | 0.846156 | -0.07 |
| NPR1   | 1.09E-06 | 2.38E-05 | -0.62 |
| NR3C1  | 0.000124 | 0.000752 | -0.28 |
| NR4A1  | 0.002509 | 0.009028 | -0.37 |
| NR4A3  | 0.000109 | 0.000678 | -0.36 |
| NRCAM  | 0.152257 | 0.234021 | -0.14 |
| NRP1   | 7.10E-05 | 0.000502 | -0.35 |
| NRP2   | 0.007242 | 0.020653 | -0.4  |
| NRXN1  | 0.029482 | 0.06542  | -0.29 |
| NRXN3  | 0.000607 | 0.00275  | -0.46 |
| NTRK1  | 0.05916  | 0.113035 | -0.25 |
| OAS1   | 0.951215 | 0.962464 | -0.01 |
| OCLN   | 0.003318 | 0.011038 | 0.22  |

|         |          |          |       |
|---------|----------|----------|-------|
| OGN     | 4.01E-08 | 2.57E-06 | -1    |
| OLFML2B | 7.87E-09 | 8.27E-07 | -0.59 |
| OVOL2   | 0.322559 | 0.422398 | -0.04 |
| P3H1    | 0.274334 | 0.369679 | 0.05  |
| P3H2    | 0.030377 | 0.066262 | 0.25  |
| PCOLCE  | 3.48E-06 | 5.26E-05 | -0.53 |
| PDCD10  | 0.320612 | 0.420564 | 0.08  |
| PDCL3   | 0.016654 | 0.04097  | -0.11 |
| PDGFA   | 0.371404 | 0.470018 | 0.23  |
| PDGFC   | 0.145943 | 0.228871 | -0.29 |
| PDGFRB  | 0.604465 | 0.687503 | 0.06  |
| PDK1    | 0.015889 | 0.039595 | 0.21  |
| PDPN    | 0.000401 | 0.001977 | 0.52  |
| PEBP4   | 0.001595 | 0.00633  | -0.43 |
| PECAM1  | 0.183628 | 0.26831  | 0.11  |
| PFKFB1  | 0.134436 | 0.214762 | -0.14 |
| PFKFB4  | 0.003685 | 0.012125 | 0.24  |
| PGK1    | 0.212232 | 0.304885 | 0.17  |
| PIK3CA  | 0.000631 | 0.002825 | -0.2  |
| PIK3CD  | 0.001734 | 0.006743 | -0.24 |
| PIK3CG  | 0.061876 | 0.116788 | -0.12 |
| PIK3R1  | 1.88E-05 | 0.000175 | -0.24 |
| PIK3R2  | 0.429193 | 0.532172 | 0.01  |
| PIK3R5  | 0.000432 | 0.002105 | -0.31 |
| PIK3R6  | 0.091339 | 0.160207 | -0.14 |
| PITX2   | 0.580808 | 0.665509 | -0.17 |
| PKM     | 0.122151 | 0.198014 | 0.12  |
| PKN1    | 0.140516 | 0.221716 | -0.17 |
| PKNOX1  | 0.03773  | 0.079594 | -0.21 |
| PLA2G10 | 0.074468 | 0.134602 | 0.11  |
| PLA2G2A | 0.005763 | 0.017143 | -0.39 |
| PLA2G2D | 0.000246 | 0.001323 | -0.63 |
| PLA2G3  | 0.750627 | 0.806113 | 0.01  |
| PLAU    | 0.087464 | 0.154821 | 0.14  |
| PLAUR   | 0.499445 | 0.593476 | -0.05 |
| PLCG1   | 0.254197 | 0.349562 | -0.12 |
| PLCG2   | 0.25922  | 0.355159 | -0.14 |
| PLEKHO1 | 8.74E-08 | 4.20E-06 | -0.57 |
| PLS1    | 0.001686 | 0.006623 | 0.22  |
| PLXDC1  | 9.89E-05 | 0.000624 | -0.24 |
| PLXNC1  | 5.82E-06 | 7.86E-05 | -0.38 |
| PLXND1  | 0.000135 | 0.000798 | -0.21 |
| PMP22   | 0.062423 | 0.117521 | -0.16 |
| PNPLA6  | 0.252571 | 0.348529 | -0.14 |
| POPDC3  | 0.809836 | 0.862481 | 0.01  |
| POSTN   | 0.023062 | 0.053168 | -0.36 |
| PPFIBP2 | 0.002342 | 0.008627 | 0.23  |

|          |          |          |          |
|----------|----------|----------|----------|
| PPL      | 0.004793 | 0.014942 | 0.26     |
| PPP1R16B | 0.016415 | 0.040516 | -0.22    |
| PPP2CB   | 0.870204 | 0.905905 | 0.02     |
| PPP2R1A  | 0.163182 | 0.247342 | 0.11     |
| PPP3R1   | 0.325508 | 0.425536 | 0.07     |
| PRELP    | 0.00267  | 0.009519 | -0.59    |
| PRF1     | 0.001222 | 0.005003 | -0.32    |
| PRKCB    | 0.017518 | 0.042822 | -0.38    |
| PRKCG    | 0.980984 | 0.987395 | 0.02     |
| PRKCZ    | 0.093624 | 0.162732 | 0.11     |
| PROK2    | 0.346437 | 0.444595 | 0.2      |
| PROM1    | 0.019288 | 0.045557 | 0.2      |
| PRR15L   | 0.006986 | 0.020073 | 0.21     |
| PRSS22   | 0.656356 | 0.729586 | 0.07     |
| PRSS8    | 0.11113  | 0.185624 | 0.12     |
| PTEN     | 0.203171 | 0.294063 | 0.05     |
| PTGDS    | 0.046598 | 0.09467  | -0.31    |
| PTGIS    | 2.54E-09 | 8.27E-07 | -1.05    |
| PTGS2    | 0.708825 | 0.775214 | 0.02     |
| PTK2     | 0.139426 | 0.220485 | 0.07     |
| PTK2B    | 0.567262 | 0.654874 | -0.01    |
| PTK6     | 0.731892 | 0.788962 | 0.05     |
| PTPRB    | 0.656628 | 0.729586 | -0.08    |
| PTPRC    | 0.007593 | 0.021338 | -0.18    |
| PTPRM    | 0.309139 | 0.409702 | -0.12    |
| PTRF     | 0.000146 | 0.000839 | -0.34    |
| PTTG1    | 0.006985 | 0.020073 | 0.11     |
| PTX3     | 0.000137 | 0.000805 | -0.66    |
| PXDN     | 0.07536  | 0.135578 | 0.26     |
| PYCARD   | 0.021212 | 0.049353 | -0.15    |
| QKI      | 0.001171 | 0.004822 | -0.2     |
| RAB25    | 0.017801 | 0.042935 | 0.15     |
| RAC1     | 7.10E-05 | 0.000502 | 0.18     |
| RAC2     | 0.050634 | 0.100485 | -0.07    |
| RAF1     | 0.901984 | 0.924221 | 0.02     |
| RAMP1    | 7.68E-07 | 1.97E-05 | -0.62    |
| RAMP2    | 0.224194 | 0.319684 | -0.06    |
| RB1      | 0.335265 | 0.434603 | 0.07     |
| RBL1     | 0.005288 | 0.016159 | 0.12     |
| RBL2     | 0.563166 | 0.652087 | 1.00E-18 |
| RBM47    | 5.80E-07 | 1.63E-05 | 0.33     |
| RBPJ     | 0.01741  | 0.042694 | -0.13    |
| RBX1     | 0.711776 | 0.775214 | 0.01     |
| RELN     | 0.023306 | 0.05357  | -0.34    |
| RGCC     | 0.241763 | 0.337243 | -0.02    |
| RHOA     | 0.860326 | 0.901025 | 1.00E-18 |
| RNH1     | 0.004193 | 0.013342 | -0.13    |

|          |          |          |          |
|----------|----------|----------|----------|
| ROBO4    | 0.055243 | 0.106877 | 0.21     |
| ROCK1    | 8.45E-06 | 9.44E-05 | -0.17    |
| ROCK2    | 0.820851 | 0.869402 | 0.02     |
| RORA     | 4.06E-05 | 0.000316 | -0.39    |
| RORB     | 0.081853 | 0.146234 | -0.22    |
| RPS27A   | 0.14993  | 0.232754 | 0.08     |
| RPS6KB1  | 0.986982 | 0.990843 | 1.00E-18 |
| RPS6KB2  | 0.732608 | 0.788962 | 0.06     |
| RRAS     | 0.04878  | 0.097575 | -0.16    |
| RTN4     | 0.899383 | 0.924221 | 0.01     |
| RUNX1    | 0.065286 | 0.121719 | -0.23    |
| RUNX1T1  | 1.23E-06 | 2.49E-05 | -0.43    |
| S100A14  | 0.011392 | 0.029535 | 0.27     |
| S100A7   | 0.078429 | 0.140442 | 0.5      |
| S1PR1    | 1.44E-05 | 0.00014  | -0.41    |
| SACS     | 0.008244 | 0.022751 | -0.19    |
| SAMSN1   | 0.360913 | 0.460104 | -0.09    |
| SCG2     | 0.011259 | 0.029289 | -0.49    |
| SCNN1A   | 0.042348 | 0.086955 | 0.15     |
| SDC4     | 0.71052  | 0.775214 | 0.1      |
| SELE     | 0.096799 | 0.166745 | -0.18    |
| SEMA3E   | 0.117532 | 0.192963 | -0.13    |
| SERINC5  | 0.312934 | 0.413309 | 0.05     |
| SERPINA1 | 0.018879 | 0.044737 | 0.32     |
| SERPINE1 | 0.570753 | 0.655954 | -0.15    |
| SERPINF1 | 0.003501 | 0.01157  | -0.38    |
| SERPING1 | 0.00728  | 0.020686 | -0.28    |
| SERPINH1 | 0.518827 | 0.611399 | 1.00E-18 |
| SET      | 0.108582 | 0.182551 | 0.11     |
| SETD2    | 0.704447 | 0.772684 | -0.03    |
| SFRP1    | 7.49E-08 | 4.12E-06 | -1.02    |
| SFRP2    | 5.93E-07 | 1.63E-05 | -0.98    |
| SH2B3    | 0.562468 | 0.652087 | -0.03    |
| SH2D3A   | 0.004449 | 0.013981 | 0.22     |
| SH3YL1   | 0.472846 | 0.572471 | -0.05    |
| SHB      | 0.142653 | 0.224627 | -0.08    |
| SIRT1    | 0.089746 | 0.158497 | -0.08    |
| SKP1     | 0.854991 | 0.896925 | 0.03     |
| SLC12A6  | 0.616677 | 0.698296 | -0.07    |
| SLC2A1   | 0.496921 | 0.593224 | 0.1      |
| SLC35A3  | 4.30E-06 | 6.25E-05 | 0.38     |
| SLC37A1  | 0.003326 | 0.011038 | 0.22     |
| SLC44A4  | 0.051911 | 0.101967 | 0.27     |
| SLIT2    | 1.13E-05 | 0.000117 | -0.97    |
| SLPI     | 0.426424 | 0.530157 | 0.11     |
| SMAD1    | 0.455425 | 0.558403 | 0.03     |
| SMAD2    | 0.330403 | 0.429747 | 0.05     |

|         |          |          |          |
|---------|----------|----------|----------|
| SMAD3   | 0.247548 | 0.342212 | -0.02    |
| SMAD4   | 0.001047 | 0.004432 | -0.15    |
| SMAD5   | 0.074458 | 0.134602 | 0.08     |
| SMAD9   | 3.48E-05 | 0.000279 | -0.52    |
| SMC3    | 0.499055 | 0.593476 | 1.00E-18 |
| SMOC1   | 0.519292 | 0.611399 | -0.05    |
| SMURF1  | 0.594479 | 0.680162 | -0.01    |
| SMURF2  | 0.864357 | 0.90306  | 0.03     |
| SNAI1   | 0.003923 | 0.012855 | -0.38    |
| SNAI2   | 0.814683 | 0.864058 | 0.06     |
| SNAI3   | 0.017899 | 0.042935 | -0.28    |
| SNRPF   | 4.38E-06 | 6.25E-05 | 0.3      |
| SOD1    | 0.004586 | 0.014355 | -0.12    |
| SORD    | 2.68E-07 | 8.97E-06 | 0.3      |
| SOX17   | 0.014882 | 0.037448 | -0.25    |
| SOX2    | 0.233345 | 0.329077 | -0.2     |
| SOX9    | 0.002703 | 0.009554 | 0.26     |
| SP1     | 0.467827 | 0.569979 | 1.00E-18 |
| SPARC   | 0.002475 | 0.009028 | -0.26    |
| SPARCL1 | 1.54E-05 | 0.000147 | -0.42    |
| SPDEF   | 0.548804 | 0.637374 | 0.06     |
| SPHK2   | 0.691162 | 0.760278 | 0.03     |
| SPINK5  | 0.569965 | 0.655954 | -0.07    |
| SPINT1  | 0.030015 | 0.066046 | 0.15     |
| SPOCK3  | 0.156122 | 0.238519 | -0.28    |
| SPP1    | 0.346432 | 0.444595 | -0.25    |
| SRC     | 4.43E-05 | 0.000328 | 0.26     |
| SRF     | 0.001586 | 0.006328 | -0.15    |
| SRGN    | 0.486789 | 0.584754 | 1.00E-18 |
| SRPK2   | 0.000874 | 0.003802 | -0.14    |
| SRPX2   | 0.007867 | 0.021791 | -0.3     |
| SSTR2   | 0.021215 | 0.049353 | -0.24    |
| ST14    | 0.007678 | 0.021483 | 0.22     |
| STAB1   | 0.001422 | 0.005734 | -0.46    |
| STAB2   | 0.118264 | 0.193341 | -0.33    |
| STAT1   | 0.527258 | 0.61983  | 1.00E-18 |
| STAT3   | 0.067622 | 0.124297 | -0.12    |
| SULF1   | 0.144854 | 0.227628 | -0.14    |
| SV2B    | 0.174257 | 0.25975  | -0.18    |
| SYK     | 0.494415 | 0.592071 | 0.14     |
| SYNE1   | 0.004339 | 0.01375  | -0.52    |
| TACSTD2 | 0.847183 | 0.889947 | 1.00E-18 |
| TAL1    | 0.183636 | 0.26831  | -0.1     |
| TBX1    | 0.092089 | 0.161156 | -0.14    |
| TBX4    | 0.112044 | 0.18674  | -0.18    |
| TBXA2R  | 0.030994 | 0.067416 | -0.32    |
| TCEB1   | 0.326426 | 0.426014 | 0.1      |

|           |          |          |       |
|-----------|----------|----------|-------|
| TCEB2     | 0.290608 | 0.389163 | 0.09  |
| TCF20     | 0.000607 | 0.00275  | 0.17  |
| TCF3      | 0.40079  | 0.503439 | -0.02 |
| TCF4      | 9.89E-05 | 0.000624 | -0.3  |
| TDGF1     | 0.44829  | 0.551411 | -0.13 |
| TEK       | 0.567274 | 0.654874 | 0.04  |
| TF        | 0.274619 | 0.369679 | -0.15 |
| TFDP1     | 0.062991 | 0.118019 | 0.11  |
| TFPI2     | 0.360873 | 0.460104 | 0.25  |
| TGFB1     | 0.002311 | 0.008564 | -0.19 |
| TGFB2     | 0.469666 | 0.570415 | 0.1   |
| TGFBI     | 0.726644 | 0.784735 | -0.01 |
| TGFBR2    | 0.224118 | 0.319684 | -0.09 |
| THBS1     | 0.00312  | 0.01063  | -0.46 |
| THBS2     | 0.004913 | 0.015194 | -0.25 |
| THBS4     | 8.39E-07 | 2.08E-05 | -1.52 |
| THY1      | 0.002543 | 0.009107 | -0.22 |
| TIE1      | 0.00035  | 0.001783 | -0.34 |
| TIMP1     | 0.670779 | 0.742098 | -0.07 |
| TIMP2     | 0.00205  | 0.0077   | -0.32 |
| TIMP4     | 0.002501 | 0.009028 | -0.37 |
| TJP2      | 0.011258 | 0.029289 | 0.22  |
| TJP3      | 0.407681 | 0.509601 | 0.09  |
| TLR4      | 4.22E-06 | 6.25E-05 | -0.32 |
| TMC6      | 0.840631 | 0.88548  | 0.01  |
| TMEM100   | 0.011779 | 0.030435 | -0.38 |
| TMEM30B   | 0.007069 | 0.020235 | 0.12  |
| TMPRSS2   | 9.44E-06 | 0.000102 | 0.39  |
| TMPRSS4   | 0.000381 | 0.001895 | 0.4   |
| TMPRSS6   | 0.102801 | 0.174739 | -0.24 |
| TNC       | 0.215173 | 0.308534 | -0.11 |
| TNF       | 0.537963 | 0.628576 | -0.11 |
| TNFRSF12A | 0.085947 | 0.15284  | -0.09 |
| TNFRSF1A  | 0.17803  | 0.263677 | -0.05 |
| TNFSF10   | 0.717712 | 0.779467 | -0.02 |
| TNFSF12   | 0.001077 | 0.004507 | -0.49 |
| TNFSF13   | 0.002468 | 0.009028 | -0.26 |
| TNMD      | 0.231791 | 0.328476 | -0.36 |
| TNN       | 0.03885  | 0.08129  | -0.42 |
| TNS1      | 3.20E-08 | 2.24E-06 | -0.69 |
| TNXB      | 8.46E-06 | 9.44E-05 | -0.63 |
| TOM1L1    | 0.015539 | 0.038847 | 0.14  |
| TP53      | 0.36295  | 0.461936 | -0.03 |
| TPM2      | 2.73E-05 | 0.000233 | -1    |
| TPSB2     | 0.053516 | 0.104588 | 0.38  |
| TPSD1     | 0.484437 | 0.582838 | -0.15 |
| TSHR      | 0.270801 | 0.366923 | -0.16 |

|         |          |          |          |
|---------|----------|----------|----------|
| TSPAN1  | 4.28E-05 | 0.000323 | 0.76     |
| TWIST1  | 9.27E-06 | 0.000102 | -0.5     |
| TWIST2  | 0.002313 | 0.008564 | -0.32    |
| TXNIP   | 8.82E-05 | 0.000575 | -0.54    |
| TYMP    | 0.062995 | 0.118019 | -0.16    |
| UBA52   | 0.174399 | 0.25975  | 0.07     |
| UTS2    | 0.16061  | 0.243924 | -0.16    |
| VAMP8   | 0.115674 | 0.19156  | 0.15     |
| VASH1   | 0.0003   | 0.001551 | -0.36    |
| VAV2    | 0.89293  | 0.921657 | 0.04     |
| VAV3    | 0.034902 | 0.074239 | 0.21     |
| VCAM1   | 0.002756 | 0.009646 | -0.35    |
| VCAN    | 0.060778 | 0.115553 | -0.21    |
| VEGFA   | 0.124135 | 0.200385 | 0.1      |
| VEGFB   | 0.000156 | 0.000891 | -0.22    |
| VEGFC   | 0.004179 | 0.013342 | -0.17    |
| VEZF1   | 0.157899 | 0.240281 | -0.05    |
| VHL     | 0.946154 | 0.958603 | -0.01    |
| VIM     | 0.025678 | 0.057983 | -0.19    |
| VIT     | 0.413143 | 0.515591 | -0.06    |
| VPS13A  | 0.027259 | 0.060839 | 0.11     |
| VSIG4   | 8.00E-06 | 9.19E-05 | -0.73    |
| VWA1    | 0.114452 | 0.190341 | -0.12    |
| VWA2    | 0.570766 | 0.655954 | 0.03     |
| WARS    | 0.604467 | 0.687503 | 0.05     |
| WIPF1   | 7.85E-05 | 0.000544 | -0.25    |
| WNT5A   | 3.18E-05 | 0.000269 | 0.56     |
| WNT5B   | 0.965144 | 0.972724 | 0.02     |
| WWTR1   | 1.11E-06 | 2.38E-05 | -0.46    |
| ZC3H12A | 4.43E-05 | 0.000328 | 0.34     |
| ZCCHC24 | 0.00017  | 0.000946 | -0.6     |
| ZEB1    | 3.58E-07 | 1.10E-05 | -0.52    |
| ZEB2    | 0.173003 | 0.25975  | -0.12    |
| ZFPM2   | 0.0003   | 0.001551 | -0.69    |
| ZFYVE16 | 0.794047 | 0.849189 | 0.03     |
| ZFYVE9  | 0.186323 | 0.271721 | 0.06     |
| AGK     | 0.272556 | 0.368189 | -0.08    |
| AMMECR1 | 0.300764 | 0.39998  | 1.00E-18 |
| CC2D1B  | 0.674412 | 0.745046 | -0.08    |
| CNOT10  | 0.880042 | 0.913252 | 0.01     |
| CNOT4   | 0.00605  | 0.017781 | -0.1     |
| COG7    | 0.00562  | 0.016917 | -0.12    |
| DDX50   | 0.677365 | 0.746167 | -0.05    |
| DHX16   | 0.397437 | 0.500043 | 0.08     |
| DNAJC14 | 0.15225  | 0.234021 | 1.00E-18 |
| EDC3    | 0.154605 | 0.236672 | 0.09     |
| EIF2B4  | 0.128111 | 0.205941 | 0.04     |



|         |          |          |       |
|---------|----------|----------|-------|
| ERCC3   | 0.001793 | 0.006936 | -0.18 |
| FCF1    | 0.006712 | 0.019429 | -0.06 |
| GPATCH3 | 0.013322 | 0.033751 | -0.14 |
| HDAC3   | 0.010872 | 0.028768 | -0.05 |
| MRPS5   | 0.000491 | 0.002333 | 0.16  |
| MTMR14  | 0.057874 | 0.111408 | -0.1  |
| NOL7    | 0.001056 | 0.004443 | 0.23  |
| NUBP1   | 0.232066 | 0.328476 | -0.02 |
| PRPF38A | 0.822484 | 0.869936 | -0.04 |
| SAP130  | 0.017705 | 0.042935 | 0.15  |
| SF3A3   | 0.093619 | 0.162732 | -0.05 |
| TLK2    | 0.019434 | 0.045752 | -0.12 |
| TMUB2   | 0.000144 | 0.000832 | -0.18 |
| TRIM39  | 0.264274 | 0.361441 | -0.08 |
| USP39   | 3.52E-07 | 1.10E-05 | 0.25  |
| ZC3H14  | 0.138048 | 0.219182 | 0.06  |
| ZKSCAN5 | 0.656625 | 0.729586 | 0.02  |
| ZNF143  | 0.116583 | 0.192638 | 0.07  |
| ZNF346  | 0.002963 | 0.010184 | -0.16 |
