# Supplementary material for: Spatial profiling of gastric cancer patient-matched primary and locoregional metastases reveals principles of tumour dissemination
Source: PubMed Central journal article supplement — Gut. 2020 Nov 23;70(10):1823–32. doi: 10.1136/gutjnl-2020-320805 (PMC8458060; doi:10.1136/gutjnl-2020-320805), 2020-11-23
Supplement: gutjnl-2020-320805supp009.pdf [file gutjnl-2020-320805supp009.pdf]

| Gene     | pval        | qval        | Log2 Fold Change |
|----------|-------------|-------------|------------------|
| AAMP     | 0.310767943 | 0.434293387 | 0.055            |
| ABI3BP   | 0.092736816 | 0.17763022  | -0.205           |
| ACHE     | 0.009953504 | 0.029676844 | -0.26            |
| ACTG2    | 1.38E-08    | 5.30E-06    | 2.095            |
| ACVR1    | 0.00135071  | 0.006459917 | 0.325            |
| ACVR1C   | 0.779515887 | 0.858694181 | 0.105            |
| ACVRL1   | 0.014985661 | 0.041210567 | 0.24             |
| ADAM15   | 0.158720797 | 0.262827986 | 0.335            |
| ADAM17   | 0.003391161 | 0.013069679 | -0.13            |
| ADAM28   | 0.12481105  | 0.220430942 | -0.57            |
| ADAM8    | 0.7691805   | 0.853413523 | 0.04             |
| ADAM9    | 0.000568275 | 0.003340244 | 0.52             |
| ADAMTS1  | 0.036618186 | 0.085973694 | -0.295           |
| ADAMTS12 | 0.011515814 | 0.032480501 | 0.365            |
| ADAMTS8  | 0.000166682 | 0.001323146 | 0.975            |
| ADAP1    | 0.189229726 | 0.29857969  | 0.155            |
| ADD1     | 0.129616045 | 0.226333228 | 0.075            |
| ADM2     | 0.087077545 | 0.1697461   | -0.05            |
| ADRA2B   | 0.182546911 | 0.294060923 | -0.12            |
| AEBP1    | 0.218389556 | 0.332331933 | 0.1              |
| AGGF1    | 0.00024856  | 0.001772139 | -0.25            |
| AGR2     | 2.21E-05    | 0.00029847  | 1.065            |
| AGRN     | 0.779514636 | 0.858694181 | -0.015           |
| AGT      | 7.50E-06    | 0.000151874 | 1.535            |
| AHNAK    | 0.038841531 | 0.090084274 | 0.355            |
| AKAP12   | 0.341673133 | 0.464004369 | -0.21            |
| AKAP2    | 0.195808963 | 0.304813407 | -0.115           |
| AKT1     | 0.086624835 | 0.169292191 | 0.295            |
| AKT2     | 0.984595656 | 0.987160427 | 0.03             |
| AKT3     | 0.349075311 | 0.47073203  | -0.105           |
| ALB      | 0.045690612 | 0.101388389 | -0.52            |
| ALDOA    | 0.003088752 | 0.012322999 | 0.355            |
| ALOX5    | 0.000621332 | 0.003597188 | -0.545           |
| AMH      | 0.327169739 | 0.453094782 | -0.18            |
| ANG      | 0.011431222 | 0.032480501 | 0.26             |
| ANGPT1   | 0.486226233 | 0.609762539 | -0.015           |
| ANGPT2   | 0.517763955 | 0.635865444 | -0.045           |
| ANGPTL2  | 0.013103791 | 0.036425701 | 0.59             |
| ANGPTL4  | 0.946122769 | 0.969857619 | -0.08            |
| ANPEP    | 0.884867432 | 0.934633639 | 0.01             |
| ANXA2P2  | 0.147612268 | 0.249805376 | 0.185            |
| AP1M2    | 0.002007739 | 0.008636642 | 0.48             |
| APC      | 0.727715462 | 0.814988607 | 0.01             |
| APOD     | 0.277478914 | 0.400860721 | 0.2              |
| APOE     | 6.97E-05    | 0.000688451 | -0.9             |
| APOH     | 0.133329099 | 0.231223888 | -0.155           |

|          |             |             |        |
|----------|-------------|-------------|--------|
| AQP1     | 0.206011537 | 0.317257767 | -0.105 |
| ARAP2    | 0.347195712 | 0.469022797 | -0.115 |
| AREG     | 0.00092932  | 0.005004032 | 0.69   |
| ARHGAP32 | 0.000823122 | 0.004527173 | 0.43   |
| ARHGDIB  | 7.16E-07    | 3.68E-05    | -0.84  |
| ASPN     | 4.56E-07    | 3.07E-05    | 1.375  |
| ATPIF1   | 8.52E-05    | 0.00079034  | 0.345  |
| B3GNT3   | 0.004402027 | 0.01591343  | 0.26   |
| BAD      | 0.329555528 | 0.453961116 | 0.02   |
| BAG2     | 0.003186187 | 0.012581352 | 0.3    |
| BAI1     | 0.023003675 | 0.059042766 | -0.535 |
| BAI3     | 0.409010797 | 0.533793752 | -0.065 |
| BCAS1    | 0.051180614 | 0.111678877 | 0.2    |
| BGN      | 0.00259654  | 0.010691635 | -0.515 |
| BICC1    | 0.039959516 | 0.092122238 | 0.3    |
| BMP4     | 8.31E-07    | 4.00E-05    | 0.82   |
| BMP5     | 0.297152045 | 0.42060124  | 0.28   |
| BMP7     | 0.000449816 | 0.002793215 | 1.765  |
| BMPER    | 0.877249447 | 0.933513856 | -0.09  |
| BMPR1A   | 0.501909658 | 0.622335647 | 0.08   |
| BMPR1B   | 0.334372173 | 0.456501016 | 0.175  |
| BMPR2    | 0.156332183 | 0.259990888 | 0.06   |
| BNC2     | 0.813037368 | 0.881744751 | 0.125  |
| BRMS1    | 0.11671918  | 0.209016393 | 0.245  |
| BTG1     | 1.37E-05    | 0.000234168 | -0.635 |
| C1S      | 0.001493481 | 0.006927594 | 0.44   |
| C3       | 0.768425305 | 0.853413523 | -0.17  |
| C3AR1    | 0.292679116 | 0.415033001 | -0.075 |
| CADM1    | 0.839352019 | 0.903918552 | 0.065  |
| CALCRL   | 0.189221995 | 0.29857969  | 0.23   |
| CALD1    | 1.10E-05    | 0.000206359 | 0.435  |
| CAMK2A   | 0.334369357 | 0.456501016 | -0.17  |
| CAMK2B   | 0.390259527 | 0.511924763 | -0.195 |
| CAMK2D   | 0.018261743 | 0.048655855 | -0.2   |
| CAMP     | 0.354057837 | 0.476616319 | -0.14  |
| CASP8    | 0.000374722 | 0.002440263 | -0.26  |
| CAV1     | 0.000173179 | 0.001347419 | 0.64   |
| CBLC     | 0.161588236 | 0.265860986 | 0.15   |
| CCBE1    | 0.250654861 | 0.371162006 | -0.235 |
| CCDC80   | 0.011589888 | 0.032570123 | -0.49  |
| CCL11    | 1.01E-06    | 4.56E-05    | 1.535  |
| CCL21    | 8.90E-08    | 1.14E-05    | -2.77  |
| CCL5     | 0.000283755 | 0.001950816 | -0.71  |
| CCL7     | 0.517776147 | 0.635865444 | 0.285  |
| CCL8     | 0.195814171 | 0.304813407 | -0.195 |
| CCR2     | 0.000160359 | 0.001299748 | -0.5   |
| CCR3     | 0.94228324  | 0.969857619 | 0.035  |

|         |             |             |        |
|---------|-------------|-------------|--------|
| CD163   | 0.582150315 | 0.694978014 | -0.02  |
| CD24    | 7.37E-05    | 0.000713228 | 0.605  |
| CD2AP   | 0.004017587 | 0.014872797 | 0.17   |
| CD34    | 0.354902822 | 0.476920023 | 0.145  |
| CD36    | 1.34E-05    | 0.000234168 | -0.515 |
| CD44    | 0.09272874  | 0.17763022  | -0.13  |
| CD46    | 4.41E-06    | 0.00010908  | 0.33   |
| CD82    | 0.499194903 | 0.619967864 | -0.01  |
| CDC42   | 6.97E-05    | 0.000688451 | 0.225  |
| CDH1    | 0.004538104 | 0.016252744 | 0.52   |
| CDH11   | 0.002766088 | 0.011269248 | 0.305  |
| CDH13   | 0.926929816 | 0.965813204 | -0.02  |
| CDH2    | 2.80E-05    | 0.000347173 | -1.335 |
| CDK14   | 0.13566236  | 0.233999712 | -0.09  |
| CDKN1A  | 0.889237574 | 0.936679797 | -0.045 |
| CDKN2A  | 0.10706827  | 0.196760304 | -0.2   |
| CDS1    | 0.008763093 | 0.026565281 | 0.235  |
| CEACAM1 | 0.035757553 | 0.084979371 | 0.18   |
| CEACAM5 | 3.31E-05    | 0.000392251 | 1.03   |
| CEACAM6 | 0.002992362 | 0.012066162 | 0.725  |
| CEP170  | 0.96825983  | 0.979710998 | -0.02  |
| CEP295  | 0.611922695 | 0.717169673 | 0.01   |
| CFP     | 0.011433141 | 0.032480501 | -0.32  |
| CGN     | 0.428579844 | 0.550045313 | 0.07   |
| CHAD    | 0.865848284 | 0.927264505 | 0.06   |
| CHD4    | 0.003549135 | 0.013473963 | 0.105  |
| CHI3L1  | 0.004271221 | 0.015513398 | 0.635  |
| CHP1    | 0.69437815  | 0.792105445 | -0.01  |
| CHP2    | 0.646567349 | 0.747532821 | 0.055  |
| CHRDL1  | 5.58E-07    | 3.07E-05    | -1.15  |
| CHRNA7  | 0.592120057 | 0.702515321 | -0.09  |
| CIB1    | 0.022709115 | 0.058481667 | 0.17   |
| CKMT1A  | 0.334372173 | 0.456501016 | 0.26   |
| CLDN1   | 0.710144482 | 0.801776028 | 0.09   |
| CLDN3   | 0.125990233 | 0.22199652  | 0.135  |
| CLDN4   | 0.092079951 | 0.17763022  | 0.19   |
| CLDN7   | 0.17809108  | 0.288699111 | 0.135  |
| CLEC2B  | 0.003896796 | 0.014495327 | -0.185 |
| CLEC3B  | 0.139621857 | 0.238908511 | -0.01  |
| CLIC4   | 3.72E-07    | 2.87E-05    | 0.565  |
| CLU     | 0.000228217 | 0.001673594 | -0.48  |
| CMA1    | 0.001180701 | 0.005903507 | -0.94  |
| CNN1    | 0.000137265 | 0.001148849 | 1.585  |
| COL18A1 | 0.001065024 | 0.00539519  | 0.29   |
| COL1A1  | 0.575547686 | 0.690298626 | 0.08   |
| COL1A2  | 0.117852949 | 0.210549352 | 0.26   |
| COL3A1  | 0.000867272 | 0.004736165 | 0.46   |

|          |             |             |        |
|----------|-------------|-------------|--------|
| COL4A1   | 0.727723547 | 0.814988607 | -0.01  |
| COL4A2   | 0.231298565 | 0.349901562 | -0.085 |
| COL4A6   | 8.03E-05    | 0.000763641 | 1.265  |
| COL5A1   | 0.000501325 | 0.003039529 | 0.575  |
| COL5A2   | 6.30E-05    | 0.000655408 | 0.69   |
| COL6A1   | 2.84E-06    | 7.55E-05    | 0.735  |
| COL6A2   | 4.17E-05    | 0.000472168 | 0.59   |
| COL6A3   | 0.010234559 | 0.030310039 | 0.375  |
| COL7A1   | 6.39E-06    | 0.000140661 | 1.47   |
| COMP     | 0.290490445 | 0.412693369 | -0.155 |
| CREBBP   | 0.865845962 | 0.927264505 | 0.02   |
| CRIP2    | 0.1858332   | 0.296520814 | 0.29   |
| CRISPLD2 | 0.021855744 | 0.056672748 | 0.34   |
| CSF2RB   | 0.017558959 | 0.047109401 | -0.245 |
| CSPG4    | 0.00034172  | 0.002248927 | 0.665  |
| CST7     | 1.43E-05    | 0.000234281 | -0.52  |
| CTNNB1   | 0.002176922 | 0.009210053 | 0.195  |
| CTNND1   | 0.271111797 | 0.392398653 | 0.065  |
| CTSG     | 0.20775588  | 0.319305444 | -0.19  |
| CTSH     | 0.881057086 | 0.933513856 | -0.015 |
| CTSK     | 2.98E-05    | 0.00035837  | 0.55   |
| CTSL     | 0.027737923 | 0.069344807 | 0.405  |
| CUL1     | 0.179633646 | 0.290015564 | 0.015  |
| CX3CL1   | 0.028078715 | 0.069519648 | 0.145  |
| CXADR    | 0.305550535 | 0.43011684  | 0.075  |
| CXCL10   | 0.903953377 | 0.948288965 | 0.055  |
| CXCL11   | 0.592120057 | 0.702515321 | -0.21  |
| CXCL12   | 4.35E-05    | 0.000485114 | -0.76  |
| CXCL13   | 0.00017324  | 0.001347419 | -1.055 |
| CXCL17   | 0.003721791 | 0.014047938 | 0.715  |
| CXCL8    | 5.70E-06    | 0.000129199 | 1.77   |
| CXCR2    | 0.831816726 | 0.898315399 | 0.03   |
| CXCR3    | 2.78E-06    | 7.55E-05    | -0.535 |
| CXCR4    | 6.04E-05    | 0.000637605 | -0.96  |
| CYB561   | 0.250624503 | 0.371162006 | 0.195  |
| CYBB     | 0.001595678 | 0.007270248 | -0.455 |
| CYP1B1   | 1.57E-06    | 5.48E-05    | -1.295 |
| DAG1     | 0.004875386 | 0.016887289 | 0.255  |
| DCC      | 0.946125275 | 0.969857619 | 0.03   |
| DCN      | 0.000108375 | 0.000927297 | 0.655  |
| DDR2     | 0.004966948 | 0.016998001 | 0.315  |
| DENND5A  | 0.794364253 | 0.868069782 | 0.07   |
| DENR     | 0.000219445 | 0.001624734 | 0.29   |
| DESI1    | 0.003775254 | 0.014118216 | 0.13   |
| DICER1   | 0.07576214  | 0.152714261 | -0.065 |
| DLC1     | 0.172944086 | 0.28213336  | -0.135 |
| DLG1     | 0.29937444  | 0.422969393 | 0.1    |

|          |             |             |          |
|----------|-------------|-------------|----------|
| DLL4     | 0.026868453 | 0.068279567 | -0.11    |
| DPT      | 0.00075443  | 0.004209501 | -0.565   |
| DPYSL3   | 0.267362179 | 0.387700335 | 0.17     |
| DSC2     | 0.591161305 | 0.702515321 | 0.075    |
| DST      | 0.006675069 | 0.021238855 | 0.185    |
| ECM1     | 0.005104934 | 0.017172195 | 0.375    |
| ECM2     | 0.070284298 | 0.143933271 | -0.14    |
| ECSCR    | 0.656998363 | 0.757318473 | 0.075    |
| EDN1     | 0.805557238 | 0.874864701 | 0.155    |
| EGF      | 0.460222744 | 0.580936906 | -0.055   |
| EGFL7    | 0.003777081 | 0.014118216 | -0.365   |
| EGFR     | 0.12718479  | 0.223080384 | 0.085    |
| EGLN2    | 0.264848005 | 0.384779177 | 0.01     |
| EGLN3    | 0.384942615 | 0.507544201 | 0.09     |
| EIF2AK3  | 0.102789625 | 0.191666755 | -0.115   |
| EIF4E2   | 0.032847246 | 0.079038686 | 0.105    |
| EIF4EBP1 | 0.005041671 | 0.017101705 | 0.285    |
| ELF3     | 0.00214895  | 0.009192732 | 0.405    |
| ELK3     | 0.140963977 | 0.240670205 | -0.05    |
| EMCN     | 0.083992323 | 0.16541043  | 0.305    |
| EMILIN1  | 0.175005786 | 0.28489314  | 0.295    |
| EMILIN3  | 0.850683337 | 0.914841019 | -0.045   |
| EMP3     | 0.604946118 | 0.711848619 | -0.02    |
| ENO1     | 0.151694916 | 0.253373287 | 0.19     |
| ENO2     | 0.520888322 | 0.636665022 | -0.1     |
| ENO3     | 0.027436963 | 0.068815836 | -0.185   |
| ENPEP    | 0.805557238 | 0.874864701 | 1.00E-18 |
| ENPP2    | 0.000190628 | 0.001439554 | -0.325   |
| EP300    | 0.688673849 | 0.786763893 | -0.01    |
| EPAS1    | 0.010817955 | 0.03167234  | 0.325    |
| EPCAM    | 0.009982211 | 0.029676844 | 0.25     |
| EPHA1    | 0.663986925 | 0.764230093 | 0.095    |
| EPHA2    | 0.015190143 | 0.041476631 | 0.4      |
| EPHB1    | 0.283938409 | 0.406380251 | -0.285   |
| EPHB3    | 0.157296789 | 0.26103131  | 0.225    |
| EPHB4    | 0.595458489 | 0.70430574  | -0.005   |
| EPN3     | 0.831815761 | 0.898315399 | -0.02    |
| EPS8L1   | 0.14955335  | 0.251982669 | 0.085    |
| ERBB2    | 0.911603708 | 0.952423392 | 0.035    |
| ERBB2IP  | 0.972224089 | 0.981973511 | -0.03    |
| ERBB3    | 0.773970555 | 0.856260528 | 0.035    |
| EREG     | 0.078935415 | 0.15705496  | 0.455    |
| ERMP1    | 0.006483784 | 0.020715823 | 0.31     |
| ESRP1    | 0.036183521 | 0.08565917  | 0.12     |
| ETV4     | 0.254711779 | 0.374584708 | 0.22     |
| EVI2A    | 0.000924491 | 0.005004032 | -0.36    |
| EVPL     | 0.701737871 | 0.795785214 | 0.01     |

|         |             |             |          |
|---------|-------------|-------------|----------|
| F11R    | 0.001140628 | 0.005740414 | 0.24     |
| F3      | 4.53E-06    | 0.00010908  | 1.175    |
| FAM174B | 0.996148802 | 0.996148802 | 0.02     |
| FAP     | 0.246692507 | 0.368849453 | 0.12     |
| FASLG   | 0.07333745  | 0.148901357 | -0.165   |
| FBLN1   | 0.03626609  | 0.08565917  | 0.32     |
| FBLN5   | 0.665221581 | 0.764508384 | 0.08     |
| FBN1    | 0.699392881 | 0.794297642 | 0.1      |
| FBN2    | 0.79064757  | 0.866000895 | -0.095   |
| FBP1    | 0.005765048 | 0.018890662 | 0.355    |
| FERMT2  | 0.011119658 | 0.032188484 | 0.235    |
| FGF18   | 0.699394547 | 0.794297642 | 1.00E-18 |
| FGF2    | 2.68E-05    | 0.00033808  | 0.64     |
| FGF9    | 0.184184629 | 0.295768815 | -0.08    |
| FGFR1   | 0.888677821 | 0.936679797 | 0.065    |
| FGFR2   | 0.803605301 | 0.874864701 | -0.06    |
| FGFR3   | 0.344129286 | 0.466513293 | -0.07    |
| FGFR4   | 0.256668778 | 0.375748084 | -0.11    |
| FGL2    | 0.934601252 | 0.968566244 | -0.08    |
| FHL1    | 0.097796017 | 0.185045371 | 0.315    |
| FIGF    | 0.877464642 | 0.933513856 | -0.03    |
| FLI1    | 0.002993035 | 0.012066162 | -0.37    |
| FLT1    | 0.064512067 | 0.135352293 | 0.15     |
| FLT4    | 0.001012681 | 0.005164356 | -0.605   |
| FMOD    | 0.0046053   | 0.016272308 | 0.36     |
| FN1     | 0.11229022  | 0.203443457 | 0.39     |
| FOXC2   | 0.004441925 | 0.015982628 | -0.5     |
| FOXO4   | 0.042632274 | 0.097409054 | -0.035   |
| FRAS1   | 0.536679349 | 0.651802994 | -0.105   |
| FREM1   | 0.667502347 | 0.7659863   | -0.115   |
| FREM2   | 0.505362378 | 0.624605186 | 0.055    |
| FST     | 0.881059149 | 0.933513856 | 0.24     |
| FSTL1   | 0.051755928 | 0.112576453 | 0.26     |
| FUT3    | 0.001241981 | 0.006115194 | 0.385    |
| FXVD6   | 0.24866128  | 0.370354797 | -0.045   |
| GALNT7  | 5.35E-05    | 0.000579704 | 0.69     |
| GATA4   | 0.7427084   | 0.828819518 | -0.05    |
| GDF15   | 0.18599173  | 0.296520814 | 0.3      |
| GDF5    | 0.179658992 | 0.290015564 | -0.2     |
| GDF6    | 0.046642431 | 0.103203079 | -0.185   |
| GIMAP4  | 1.89E-06    | 5.99E-05    | -0.665   |
| GIMAP6  | 9.06E-05    | 0.000811127 | -0.47    |
| GJA5    | 0.70912405  | 0.801776028 | 0.09     |
| GLYR1   | 0.002765772 | 0.011269248 | 0.24     |
| GPI     | 0.001268718 | 0.006182993 | 0.415    |
| GPR124  | 0.560617919 | 0.673441182 | 0.235    |
| GPR56   | 0.002176532 | 0.009210053 | 0.285    |

|          |             |             |        |
|----------|-------------|-------------|--------|
| GPX1     | 0.584295258 | 0.696451004 | 0.1    |
| GREM1    | 1.30E-08    | 5.30E-06    | 1.99   |
| GRHL2    | 0.361633925 | 0.48343424  | 0.1    |
| GSN      | 0.11672344  | 0.209016393 | 0.19   |
| GTF2I    | 0.004965434 | 0.016998001 | 0.265  |
| GZMK     | 3.94E-06    | 0.000101238 | -0.8   |
| HAPLN1   | 2.36E-05    | 0.000307524 | 1.23   |
| HAS1     | 2.16E-05    | 0.000297309 | -0.925 |
| HDAC5    | 0.037138177 | 0.086655747 | -0.02  |
| HDHD3    | 0.361611553 | 0.48343424  | 0.045  |
| HEG1     | 0.938441429 | 0.969857619 | -0.025 |
| HGF      | 0.011514789 | 0.032480501 | 0.215  |
| HIF1A    | 0.000702917 | 0.003979749 | 0.41   |
| HIPK1    | 0.004270773 | 0.015513398 | 0.195  |
| HIPK2    | 0.043134116 | 0.098264111 | 0.195  |
| HK2      | 0.021287767 | 0.055627469 | 0.18   |
| HK3      | 0.000526686 | 0.003168348 | -0.345 |
| HKDC1    | 0.520907745 | 0.636665022 | 0.15   |
| HLADPB1  | 0.067126008 | 0.13931813  | -0.33  |
| HMOX1    | 0.000190694 | 0.001439554 | -0.43  |
| HOXA5    | 0.795918528 | 0.868069782 | -0.02  |
| HOXA7    | 0.476938026 | 0.600069085 | -0.095 |
| HOXB13   | 0.457285482 | 0.578193612 | 0.07   |
| HOXB3    | 0.290493254 | 0.412693369 | 0.17   |
| HPSE     | 0.205982477 | 0.317257767 | -0.04  |
| HRAS     | 0.437084941 | 0.55813841  | 0.115  |
| HSD17B12 | 2.52E-05    | 0.000323674 | 0.325  |
| HSP90B1  | 0.006970538 | 0.022087712 | 0.175  |
| HSPB1    | 0.942282569 | 0.969857619 | 0.125  |
| HSPG2    | 0.114492055 | 0.205978697 | 0.21   |
| HUNK     | 0.984596104 | 0.987160427 | -0.085 |
| IBSP     | 0.32008282  | 0.444880454 | -0.235 |
| ICAM1    | 0.605533565 | 0.711848619 | -0.04  |
| ID1      | 0.032107854 | 0.077990688 | 0.47   |
| ID2      | 0.783216626 | 0.860309275 | -0.015 |
| ID4      | 0.05657237  | 0.121696575 | -0.26  |
| IFNG     | 0.088412206 | 0.171912622 | -0.205 |
| IGF1     | 0.012078162 | 0.033818852 | -0.355 |
| IGFBP4   | 0.045168846 | 0.100811628 | 0.21   |
| IGFBP7   | 0.138296335 | 0.237451108 | -0.41  |
| IL10RA   | 2.60E-07    | 2.51E-05    | -0.685 |
| IL11     | 1.94E-06    | 5.99E-05    | 1.265  |
| IL13RA2  | 0.03662256  | 0.085973694 | 0.55   |
| IL15     | 0.00027335  | 0.00191345  | -0.315 |
| IL18     | 0.001879597 | 0.008176777 | -0.285 |
| IL1A     | 0.110119814 | 0.200929519 | 0.315  |
| IL1B     | 7.41E-05    | 0.000713228 | 0.675  |

|          |             |             |        |
|----------|-------------|-------------|--------|
| IL1RL1   | 0.007177704 | 0.022558499 | 0.205  |
| IL1RN    | 0.00038347  | 0.002440263 | 0.475  |
| IL6      | 0.477994083 | 0.600416711 | -0.045 |
| ILK      | 0.000151241 | 0.001238892 | 0.35   |
| INHBA    | 0.110117742 | 0.200929519 | 0.41   |
| INHBE    | 0.632762053 | 0.737105568 | -0.08  |
| IRF6     | 0.001816933 | 0.008096823 | 0.225  |
| ISL1     | 0.019993637 | 0.052722947 | 0.245  |
| ISLR     | 0.238910757 | 0.358598992 | -0.07  |
| ITGA1    | 0.004726305 | 0.016542069 | 0.215  |
| ITGA11   | 0.015427019 | 0.041974574 | 0.34   |
| ITGA2    | 3.43E-05    | 0.000399661 | 0.635  |
| ITGA3    | 0.001200546 | 0.005964001 | 0.24   |
| ITGA5    | 0.00182066  | 0.008096823 | 0.775  |
| ITGA6    | 0.000578683 | 0.003375649 | 0.41   |
| ITGA7    | 0.069540757 | 0.143178837 | -0.095 |
| ITGA8    | 0.054718704 | 0.118352252 | 0.305  |
| ITGA9    | 0.384937078 | 0.507544201 | -0.05  |
| ITGAM    | 0.021311823 | 0.055627469 | -0.195 |
| ITGB1    | 9.06E-05    | 0.000811127 | 0.32   |
| ITGB1BP1 | 0.194220608 | 0.304813407 | 0.08   |
| ITGB2    | 1.98E-05    | 0.000297309 | -0.625 |
| ITGB3    | 0.000317011 | 0.002125164 | 0.64   |
| ITGB4    | 0.028425891 | 0.069929507 | 0.29   |
| ITGB6    | 0.018743133 | 0.049595233 | 0.53   |
| ITGB7    | 0.001850702 | 0.008096823 | -0.67  |
| ITGB8    | 0.000381635 | 0.002440263 | 0.325  |
| ITM2A    | 0.032499405 | 0.078446839 | -0.61  |
| JAG1     | 0.109047092 | 0.19991967  | 0.155  |
| JAM2     | 0.816780248 | 0.884558075 | 0.14   |
| JAM3     | 0.957656551 | 0.972817341 | 0.1    |
| JUN      | 0.283910363 | 0.406380251 | 0.165  |
| KCNJ8    | 0.027397115 | 0.068815836 | -0.23  |
| KDM1A    | 0.00144241  | 0.006813837 | 0.18   |
| KDR      | 0.00585024  | 0.019035499 | 0.265  |
| KIAA1462 | 0.000106259 | 0.000927297 | -0.495 |
| KISS1    | 0.582156908 | 0.694978014 | -0.07  |
| KLK3     | 0.3796949   | 0.502345486 | -0.17  |
| KRAS     | 0.065703224 | 0.137180442 | 0.115  |
| KRIT1    | 0.132060627 | 0.230060368 | 0.075  |
| KRT1     | 0.094915959 | 0.180457501 | -0.165 |
| KRT14    | 0.124815442 | 0.220430942 | 0.475  |
| KRT19    | 0.065917875 | 0.137180442 | 0.25   |
| KRT7     | 0.18599942  | 0.296520814 | 0.105  |
| LAD1     | 0.30618237  | 0.430219753 | 0.115  |
| LAMA1    | 0.365357423 | 0.486721827 | -0.045 |
| LAMA3    | 0.018741065 | 0.049595233 | 0.28   |



|          |             |             |          |
|----------|-------------|-------------|----------|
| LAMA4    | 0.211255192 | 0.32339264  | 0.245    |
| LAMA5    | 0.178093607 | 0.288699111 | 0.18     |
| LAMB3    | 8.18E-05    | 0.000767916 | 0.505    |
| LAMC1    | 3.45E-07    | 2.87E-05    | 0.395    |
| LAMC2    | 0.010967651 | 0.03186962  | 0.23     |
| LDHA     | 0.000129356 | 0.001094553 | 0.4      |
| LEFTY1   | 0.746474813 | 0.831817086 | -0.02    |
| LGALS1   | 0.000283732 | 0.001950816 | 0.565    |
| LHFP     | 2.41E-06    | 7.13E-05    | -0.435   |
| LIFR     | 1.20E-06    | 4.86E-05    | -0.6     |
| LLGL2    | 0.043968661 | 0.098993769 | 0.18     |
| LOX      | 0.017670119 | 0.047243026 | 0.265    |
| LOXL2    | 0.457285482 | 0.578193612 | -0.09    |
| LRG1     | 0.023330232 | 0.059681989 | 0.225    |
| LTBP4    | 0.952406912 | 0.971328904 | 0.115    |
| LUM      | 2.12E-05    | 0.000297309 | 0.575    |
| LY96     | 0.004606965 | 0.016272308 | -0.44    |
| MAF      | 0.001359623 | 0.006462405 | -0.245   |
| MAP2K1   | 0.10621134  | 0.195652468 | 0.09     |
| MAP2K2   | 0.197482322 | 0.306221255 | -0.01    |
| MAP2K4   | 0.594585196 | 0.70430574  | -0.045   |
| MAP3K7   | 0.417385682 | 0.541055514 | -0.065   |
| MAPK1    | 0.000994512 | 0.005143979 | 0.14     |
| MAPK3    | 0.001468822 | 0.0068963   | 0.3      |
| MAPKAPK3 | 0.728197613 | 0.814988607 | 1.00E-18 |
| MCAM     | 0.023886735 | 0.060903264 | 0.225    |
| MED1     | 0.278242784 | 0.401211505 | 0.045    |
| MED23    | 0.16371872  | 0.268791928 | 0.065    |
| MEG3     | 0.094690902 | 0.180457501 | 0.35     |
| MEOX2    | 0.000690945 | 0.003940945 | -0.58    |
| MET      | 0.010968116 | 0.03186962  | 0.205    |
| MFAP4    | 0.00593802  | 0.019211242 | 0.785    |
| MGAT5    | 0.195951476 | 0.304813407 | 0.08     |
| MGP      | 0.426152121 | 0.548727987 | -0.08    |
| MISP     | 0.06381773  | 0.134261344 | 0.265    |
| MMP1     | 1.06E-06    | 4.56E-05    | 1.07     |
| MMP10    | 1.48E-06    | 5.41E-05    | 1.345    |
| MMP12    | 0.000492443 | 0.003009375 | 1.055    |
| MMP13    | 0.505357419 | 0.624605186 | 0.115    |
| MMP14    | 2.36E-05    | 0.000307524 | 0.675    |
| MMP17    | 0.061097306 | 0.129600347 | -0.25    |
| MMP2     | 5.92E-08    | 1.14E-05    | 1.665    |
| MMP24    | 0.457298584 | 0.578193612 | 0.085    |
| MMP3     | 1.29E-07    | 1.42E-05    | 2.34     |
| MMP9     | 0.001761807 | 0.007934265 | -0.595   |
| MMRN2    | 0.709122333 | 0.801776028 | -0.02    |
| MPDZ     | 0.965349577 | 0.978051545 | 0.015    |

|        |             |             |        |
|--------|-------------|-------------|--------|
| MRC1   | 0.911605247 | 0.952423392 | 0.055  |
| MS4A4A | 0.839352941 | 0.903918552 | -0.035 |
| MS4A6A | 0.081218651 | 0.161181343 | -0.05  |
| MT3    | 0.072569178 | 0.147829495 | -0.235 |
| MTA1   | 0.783211701 | 0.860309275 | -0.045 |
| MTBP   | 0.915430801 | 0.955124277 | 0.015  |
| MTDH   | 0.16448731  | 0.269479209 | 0.135  |
| MTOR   | 0.160701538 | 0.265536876 | -0.035 |
| MUC1   | 0.000449816 | 0.002793215 | 0.855  |
| MYC    | 0.003443868 | 0.013192929 | -0.38  |
| MYCL   | 0.51154465  | 0.631232982 | -0.065 |
| MYH11  | 2.16E-05    | 0.000297309 | 1.145  |
| MYLK   | 0.000754323 | 0.004209501 | 0.58   |
| MYO1D  | 0.016881253 | 0.045449526 | 0.155  |
| MYO5C  | 0.047178563 | 0.104090238 | 0.14   |
| NAA15  | 0.881376736 | 0.933513856 | 0.005  |
| NAP1L3 | 0.189175604 | 0.29857969  | -0.06  |
| NCAM1  | 0.639647152 | 0.740644071 | 0.145  |
| NCL    | 2.85E-05    | 0.000348815 | 0.36   |
| NDNF   | 0.003391384 | 0.013069679 | 0.435  |
| NDP    | 0.26074729  | 0.379537644 | -0.19  |
| NDRG1  | 0.984596373 | 0.987160427 | -0.005 |
| NF1    | 0.111184189 | 0.201948709 | 0.08   |
| NF2    | 0.426129231 | 0.548727987 | -0.065 |
| NFAT5  | 0.948440401 | 0.969857619 | 0.025  |
| NFATC2 | 2.63E-06    | 7.51E-05    | -0.595 |
| NFKB1  | 0.608897659 | 0.714712191 | 0.03   |
| NID2   | 0.041664709 | 0.095481624 | 0.52   |
| NME1   | 9.05E-05    | 0.000811127 | 0.32   |
| NME4   | 0.099696213 | 0.18785683  | 0.27   |
| NODAL  | 0.884866766 | 0.934633639 | 0.035  |
| NOS2   | 0.085744899 | 0.167998911 | 0.47   |
| NOS3   | 0.13846175  | 0.237451108 | -0.03  |
| NOTCH1 | 0.550605901 | 0.66348442  | -0.035 |
| NOX5   | 0.517776147 | 0.635865444 | -0.06  |
| NPR1   | 0.00150755  | 0.006950979 | -0.25  |
| NR3C1  | 0.000176578 | 0.001359649 | -0.295 |
| NR4A1  | 0.129627212 | 0.226333228 | -0.09  |
| NR4A3  | 0.00101275  | 0.005164356 | -0.42  |
| NRCAM  | 0.772122231 | 0.855444774 | 0.065  |
| NRP1   | 0.045166342 | 0.100811628 | -0.26  |
| NRP2   | 0.111202925 | 0.201948709 | 0.13   |
| NRXN1  | 0.881382562 | 0.933513856 | 0.145  |
| NRXN3  | 0.133324577 | 0.231223888 | 0.265  |
| NTRK1  | 0.36418539  | 0.4860013   | -0.06  |
| OAS1   | 0.192517368 | 0.303145957 | 0.03   |
| OCLN   | 0.004890734 | 0.016887289 | 0.215  |

|         |             |             |        |
|---------|-------------|-------------|--------|
| OGN     | 0.331966667 | 0.455640524 | 0.29   |
| OLFML2B | 1.86E-05    | 0.000286134 | -0.71  |
| OVOL2   | 0.227536096 | 0.345567641 | 0.1    |
| P3H1    | 0.005858978 | 0.019035499 | 0.26   |
| P3H2    | 0.005040139 | 0.017101705 | 0.63   |
| PCOLCE  | 0.101769375 | 0.19066282  | -0.21  |
| PDCD10  | 0.051198239 | 0.111678877 | 0.165  |
| PDCL3   | 0.62248498  | 0.727339235 | 0.035  |
| PDGFA   | 0.02807597  | 0.069519648 | 0.17   |
| PDGFC   | 0.007825458 | 0.024199208 | 0.37   |
| PDGFRB  | 0.010573522 | 0.031193916 | 0.17   |
| PDK1    | 0.426154982 | 0.548727987 | -0.13  |
| PDPN    | 7.58E-08    | 1.14E-05    | 1.715  |
| PEBP4   | 0.020171739 | 0.053011055 | -0.495 |
| PECAM1  | 0.146269471 | 0.248625811 | 0.32   |
| PFKFB1  | 0.039475862 | 0.091280522 | -0.26  |
| PFKFB4  | 0.007678448 | 0.023840343 | 0.5    |
| PGK1    | 0.290484825 | 0.412693369 | 0.065  |
| PIK3CA  | 0.028420353 | 0.069929507 | -0.145 |
| PIK3CD  | 7.49E-06    | 0.000151874 | -0.65  |
| PIK3CG  | 1.07E-05    | 0.000206359 | -0.525 |
| PIK3R1  | 0.03210585  | 0.077990688 | -0.145 |
| PIK3R2  | 0.948445178 | 0.969857619 | 0.05   |
| PIK3R5  | 4.72E-05    | 0.000519476 | -0.43  |
| PIK3R6  | 0.001977126 | 0.008552738 | -0.4   |
| PITX2   | 0.308463886 | 0.432636051 | -0.02  |
| PKM     | 0.003340592 | 0.013057135 | 0.24   |
| PKN1    | 0.492478671 | 0.613296715 | -0.04  |
| PKNOX1  | 0.070225658 | 0.143933271 | -0.225 |
| PLA2G10 | 0.016230335 | 0.044004783 | 0.335  |
| PLA2G2A | 0.89631264  | 0.941556252 | 0.075  |
| PLA2G2D | 1.42E-06    | 5.41E-05    | -1.07  |
| PLA2G3  | 0.865848284 | 0.927264505 | -0.125 |
| PLAU    | 5.30E-07    | 3.07E-05    | 0.78   |
| PLAUR   | 0.168942956 | 0.276191244 | 0.335  |
| PLCG1   | 0.195806359 | 0.304813407 | -0.07  |
| PLCG2   | 6.83E-05    | 0.000688451 | -1.105 |
| PLEKHO1 | 0.000217912 | 0.001624734 | -0.47  |
| PLS1    | 0.000767422 | 0.004251187 | 0.315  |
| PLXDC1  | 0.724573635 | 0.814484232 | 0.035  |
| PLXNC1  | 0.000108385 | 0.000927297 | -0.23  |
| PLXND1  | 0.713737114 | 0.803475991 | 0.025  |
| PMP22   | 0.000323183 | 0.002145264 | 0.31   |
| PNPLA6  | 0.934602772 | 0.968566244 | 0.12   |
| POPDC3  | 0.750058743 | 0.834602937 | 0.055  |
| POSTN   | 0.150335651 | 0.252093511 | 0.335  |
| PPFIBP2 | 0.078914482 | 0.15705496  | 0.105  |

|          |             |             |        |
|----------|-------------|-------------|--------|
| PPL      | 0.000978579 | 0.005143979 | 0.645  |
| PPP1R16B | 2.12E-05    | 0.000297309 | -0.625 |
| PPP2CB   | 0.003132392 | 0.012432691 | 0.23   |
| PPP2R1A  | 0.059423451 | 0.12710016  | 0.105  |
| PPP3R1   | 0.873873598 | 0.933513856 | 0.01   |
| PRELP    | 0.011275435 | 0.032480501 | -0.3   |
| PRF1     | 0.002514284 | 0.010410412 | -0.285 |
| PRKCB    | 4.86E-06    | 0.000113325 | -1.655 |
| PRKCG    | 0.530353313 | 0.646158309 | -0.08  |
| PRK CZ   | 0.034499994 | 0.082244569 | 0.24   |
| PROK2    | 0.134586385 | 0.232879812 | 0.22   |
| PROM1    | 8.02E-06    | 0.000158292 | 0.525  |
| PRR15L   | 0.033684678 | 0.080551507 | 0.155  |
| PRSS22   | 0.361327477 | 0.48343424  | 0.035  |
| PRSS8    | 0.082275917 | 0.162859784 | 0.245  |
| PTEN     | 0.008386947 | 0.02572888  | 0.115  |
| PTGDS    | 7.00E-06    | 0.000149765 | -1.345 |
| PTGIS    | 0.008646919 | 0.02631671  | -0.49  |
| PTGS2    | 0.520893178 | 0.636665022 | 0.09   |
| PTK2     | 0.007093685 | 0.022385809 | 0.285  |
| PTK2B    | 2.11E-05    | 0.000297309 | -0.47  |
| PTK6     | 0.490052386 | 0.612571802 | 0.095  |
| PTPRB    | 0.123623063 | 0.21933124  | 0.125  |
| PTPRC    | 0.000381635 | 0.002440263 | -0.67  |
| PTPRM    | 0.147595757 | 0.249805376 | 0.23   |
| PTRF     | 0.097809696 | 0.185045371 | -0.22  |
| PTTG1    | 0.077288102 | 0.15538339  | 0.205  |
| PTX3     | 0.001850589 | 0.008096823 | -0.81  |
| PXDN     | 0.001762025 | 0.007934265 | 0.5    |
| PYCARD   | 0.073483786 | 0.148901357 | -0.05  |
| QKI      | 0.699384553 | 0.794297642 | -0.04  |
| RAB25    | 0.003394722 | 0.013069679 | 0.31   |
| RAC1     | 1.52E-05    | 0.000239944 | 0.375  |
| RAC2     | 5.17E-07    | 3.07E-05    | -0.74  |
| RAF1     | 0.49302684  | 0.613296715 | 0.02   |
| RAMP1    | 0.52403453  | 0.639471614 | 0.055  |
| RAMP2    | 0.892495274 | 0.938826996 | 0.275  |
| RB1      | 0.036859514 | 0.086266948 | 0.08   |
| RBL1     | 0.336791757 | 0.458990536 | -0.135 |
| RBL2     | 0.252629105 | 0.373367391 | -0.055 |
| RBM47    | 0.000425577 | 0.002686019 | 0.34   |
| RBPJ     | 0.315367599 | 0.439170465 | 0.135  |
| RBX1     | 0.085724829 | 0.167998911 | 0.1    |
| RELN     | 0.01241235  | 0.034628657 | -0.29  |
| RGCC     | 0.437087612 | 0.55813841  | 0.035  |
| RHOA     | 0.411835954 | 0.535749828 | 0.035  |
| RNH1     | 0.118986718 | 0.212082807 | -0.06  |

|          |             |             |        |
|----------|-------------|-------------|--------|
| ROBO4    | 0.310773579 | 0.434293387 | 0.25   |
| ROCK1    | 0.329549894 | 0.453961116 | 0.02   |
| ROCK2    | 0.001849793 | 0.008096823 | 0.165  |
| RORA     | 0.000241791 | 0.001756407 | -0.29  |
| RORB     | 0.341675944 | 0.464004369 | 0.09   |
| RPS27A   | 0.371859373 | 0.493675374 | -0.065 |
| RPS6KB1  | 0.238179549 | 0.358199712 | 0.06   |
| RPS6KB2  | 0.434256163 | 0.556368129 | -0.06  |
| RRAS     | 0.379686573 | 0.502345486 | 0.07   |
| RTN4     | 1.26E-05    | 0.000230596 | 0.24   |
| RUNX1    | 0.044654593 | 0.100245005 | 0.24   |
| RUNX1T1  | 0.214788995 | 0.327500052 | -0.155 |
| S100A14  | 0.056581005 | 0.121696575 | 0.425  |
| S100A7   | 0.126778764 | 0.22287591  | 0.22   |
| S1PR1    | 9.81E-05    | 0.000868033 | -0.485 |
| SACS     | 0.946124335 | 0.969857619 | -0.04  |
| SAMSN1   | 0.001493291 | 0.006927594 | -0.325 |
| SCG2     | 0.213026106 | 0.32545655  | -0.26  |
| SCNN1A   | 5.46E-05    | 0.000583591 | 0.71   |
| SDC4     | 0.303889587 | 0.428562239 | 0.25   |
| SELE     | 0.942282904 | 0.969857619 | 0.055  |
| SEMA3E   | 0.04892091  | 0.107626002 | 0.355  |
| SERINC5  | 0.250562748 | 0.371162006 | 0.095  |
| SERPINA1 | 0.061773181 | 0.130674036 | 0.205  |
| SERPINE1 | 0.533516286 | 0.648985055 | -0.095 |
| SERPINF1 | 0.877250157 | 0.933513856 | -0.095 |
| SERPING1 | 0.002514723 | 0.010410412 | 0.38   |
| SERPINH1 | 0.068811769 | 0.142432963 | 0.24   |
| SET      | 0.260705635 | 0.379537644 | 0.02   |
| SETD2    | 0.457092163 | 0.578193612 | -0.07  |
| SFRP1    | 0.105890583 | 0.195529373 | -0.17  |
| SFRP2    | 0.075697714 | 0.152714261 | 0.46   |
| SH2B3    | 0.246698011 | 0.368849453 | -0.095 |
| SH2D3A   | 0.254912191 | 0.374584708 | 0.065  |
| SH3YL1   | 0.549497197 | 0.663186272 | -0.045 |
| SHB      | 0.959099158 | 0.972999146 | -0.065 |
| SIRT1    | 0.454350755 | 0.578193612 | -0.03  |
| SKP1     | 0.000288848 | 0.001968254 | 0.205  |
| SLC12A6  | 0.142299792 | 0.242413363 | -0.08  |
| SLC2A1   | 0.980745915 | 0.987156132 | -0.08  |
| SLC35A3  | 0.000458014 | 0.002821366 | 0.505  |
| SLC37A1  | 0.008645365 | 0.02631671  | 0.37   |
| SLC44A4  | 0.414659696 | 0.538428273 | 0.05   |
| SLIT2    | 0.072570843 | 0.147829495 | -0.37  |
| SLPI     | 0.02949253  | 0.072322446 | 0.505  |
| SMAD1    | 0.103816803 | 0.193089224 | 0.115  |
| SMAD2    | 0.23699134  | 0.357110239 | 0.1    |

|         |             |             |        |
|---------|-------------|-------------|--------|
| SMAD3   | 0.001542871 | 0.007071492 | -0.22  |
| SMAD4   | 0.078273795 | 0.15654759  | -0.145 |
| SMAD5   | 0.000995122 | 0.005143979 | 0.16   |
| SMAD9   | 0.53988509  | 0.652608351 | 0.025  |
| SMC3    | 0.387572053 | 0.510137575 | 0.05   |
| SMOC1   | 0.795918528 | 0.868069782 | 0.01   |
| SMURF1  | 0.197651901 | 0.306221255 | 0.09   |
| SMURF2  | 0.014204349 | 0.039201968 | 0.11   |
| SNAI1   | 0.015187182 | 0.041476631 | -0.31  |
| SNAI2   | 6.97E-05    | 0.000688451 | 0.745  |
| SNAI3   | 0.000139947 | 0.001158697 | -0.48  |
| SNRPF   | 1.31E-05    | 0.000234168 | 0.35   |
| SOD1    | 0.639639353 | 0.740644071 | -0.035 |
| SORD    | 1.77E-06    | 5.91E-05    | 0.56   |
| SOX17   | 0.065917875 | 0.137180442 | -0.145 |
| SOX2    | 0.36930786  | 0.491134805 | 0.2    |
| SOX9    | 1.53E-05    | 0.000239944 | 0.4    |
| SP1     | 0.058071356 | 0.124554162 | 0.09   |
| SPARC   | 0.992063289 | 0.993353358 | -0.12  |
| SPARCL1 | 0.000263303 | 0.001860034 | 0.565  |
| SPDEF   | 0.027059923 | 0.068539936 | 0.285  |
| SPHK2   | 0.279611538 | 0.402431559 | -0.085 |
| SPINK5  | 0.315404243 | 0.439170465 | 0.245  |
| SPINT1  | 0.037939916 | 0.08825902  | 0.245  |
| SPOCK3  | 0.428606737 | 0.550045313 | -0.16  |
| SPP1    | 0.555952698 | 0.66888059  | 0.245  |
| SRC     | 0.004606489 | 0.016272308 | 0.22   |
| SRF     | 0.150323772 | 0.252093511 | 0.115  |
| SRGN    | 0.078102174 | 0.15654759  | -0.245 |
| SRPK2   | 0.005351111 | 0.017760152 | -0.125 |
| SRPX2   | 0.083994128 | 0.16541043  | 0.235  |
| SSTR2   | 0.031717363 | 0.077531333 | -0.22  |
| ST14    | 0.002284553 | 0.009612598 | 0.36   |
| STAB1   | 0.135841391 | 0.233999712 | -0.23  |
| STAB2   | 0.005273307 | 0.017577691 | -0.45  |
| STAT1   | 0.932615894 | 0.968566244 | 0.015  |
| STAT3   | 0.952403678 | 0.971328904 | 0.005  |
| SULF1   | 0.010669626 | 0.031357298 | 0.3    |
| SV2B    | 0.008895255 | 0.026860182 | -0.285 |
| SYK     | 0.204283068 | 0.315859362 | -0.305 |
| SYNE1   | 0.148962115 | 0.251536905 | -0.27  |
| TACSTD2 | 0.008167644 | 0.025156343 | 0.43   |
| TAL1    | 0.045681784 | 0.101388389 | -0.225 |
| TBX1    | 0.000317395 | 0.002125164 | -0.645 |
| TBX4    | 0.78693456  | 0.863161839 | -0.025 |
| TBXA2R  | 0.150601318 | 0.252093511 | -0.03  |
| TCEB1   | 0.283901949 | 0.406380251 | 0.095  |

|           |             |             |        |
|-----------|-------------|-------------|--------|
| TCEB2     | 0.027390816 | 0.068815836 | 0.2    |
| TCF20     | 0.003552227 | 0.013473963 | 0.155  |
| TCF3      | 0.290479206 | 0.412693369 | -0.02  |
| TCF4      | 0.062447567 | 0.131738703 | -0.18  |
| TDGF1     | 0.776792506 | 0.85814954  | -0.115 |
| TEK       | 0.099783693 | 0.18785683  | 0.18   |
| TF        | 0.005765332 | 0.018890662 | -0.685 |
| TFDP1     | 0.032481221 | 0.078446839 | 0.085  |
| TFPI2     | 0.258714963 | 0.37800858  | 0.575  |
| TGFB1     | 0.001246864 | 0.006115194 | -0.345 |
| TGFB2     | 0.002475209 | 0.010358212 | 0.53   |
| TGFBI     | 0.003083003 | 0.012322999 | 0.495  |
| TGFBR2    | 0.040222838 | 0.092452493 | -0.24  |
| THBS1     | 0.911605247 | 0.952423392 | 0.005  |
| THBS2     | 0.329563979 | 0.453961116 | -0.335 |
| THBS4     | 0.236988609 | 0.357110239 | 0.48   |
| THY1      | 0.061097306 | 0.129600347 | 0.135  |
| TIE1      | 0.049473529 | 0.108531674 | -0.17  |
| TIMP1     | 0.653516286 | 0.754434093 | -0.34  |
| TIMP2     | 0.004748023 | 0.016542887 | 0.52   |
| TIMP4     | 0.043637237 | 0.098541229 | -0.42  |
| TJP2      | 0.001284313 | 0.006219629 | 0.29   |
| TJP3      | 0.187579878 | 0.298422533 | 0.225  |
| TLR4      | 0.043633563 | 0.098541229 | -0.08  |
| TMC6      | 0.004206709 | 0.015424599 | -0.49  |
| TMEM100   | 0.184375365 | 0.295768815 | 0.245  |
| TMEM30B   | 0.104919201 | 0.194209362 | 0.145  |
| TMPRSS2   | 1.43E-05    | 0.000234281 | 0.64   |
| TMPRSS4   | 0.006227484 | 0.019979845 | 0.4    |
| TMPRSS6   | 0.25667986  | 0.375748084 | -0.2   |
| TNC       | 0.463149555 | 0.583674562 | 0.175  |
| TNF       | 0.007387265 | 0.023029125 | -0.305 |
| TNFRSF12A | 0.672457004 | 0.77052365  | 0.03   |
| TNFRSF1A  | 0.324792402 | 0.450612882 | 0.09   |
| TNFSF10   | 0.161585794 | 0.265860986 | -0.04  |
| TNFSF12   | 0.091772963 | 0.177550706 | -0.195 |
| TNFSF13   | 0.104923499 | 0.194209362 | -0.035 |
| TNMD      | 0.102803078 | 0.191666755 | -0.15  |
| TNN       | 0.398296899 | 0.521579273 | 0.22   |
| TNS1      | 0.052926984 | 0.114799373 | 0.185  |
| TNXB      | 0.009678925 | 0.028999115 | -0.16  |
| TOM1L1    | 0.004677013 | 0.016444292 | 0.215  |
| TP53      | 0.679736344 | 0.777707258 | -0.03  |
| TPM2      | 0.043639687 | 0.098541229 | 0.37   |
| TPSB2     | 0.00054843  | 0.003248394 | 0.59   |
| TPSD1     | 0.956368867 | 0.972792639 | -0.01  |
| TSHR      | 0.347198694 | 0.469022797 | -0.07  |

|          |             |             |          |
|----------|-------------|-------------|----------|
| TSPAN1   | 0.00024422  | 0.001757473 | 0.99     |
| TWIST1   | 0.735201706 | 0.821633257 | 0.04     |
| TWIST2   | 0.451465972 | 0.575544368 | 0.17     |
| TXNIP    | 3.99E-05    | 0.000458155 | -0.91    |
| TYMP     | 0.033685176 | 0.080551507 | -0.2     |
| UBA52    | 0.231282261 | 0.349901562 | 0.075    |
| UTS2     | 0.254658617 | 0.374584708 | -0.1     |
| VAMP8    | 0.390229161 | 0.511924763 | 0.155    |
| VASH1    | 0.001313218 | 0.006319859 | -0.28    |
| VAV2     | 0.406422243 | 0.531316005 | 0.075    |
| VAV3     | 0.953812076 | 0.971475263 | -0.065   |
| VCAM1    | 0.005195485 | 0.01739358  | -0.415   |
| VCAN     | 0.155882469 | 0.259804115 | 0.15     |
| VEGFA    | 0.189154815 | 0.29857969  | 0.065    |
| VEGFB    | 0.636185922 | 0.739290409 | 1.00E-18 |
| VEGFC    | 0.011429303 | 0.032480501 | -0.255   |
| VEZF1    | 0.022476571 | 0.058077046 | 0.125    |
| VHL      | 0.00723378  | 0.022642321 | -0.115   |
| VIM      | 0.248666792 | 0.370354797 | -0.36    |
| VIT      | 0.622489034 | 0.727339235 | -0.055   |
| VPS13A   | 0.005514289 | 0.018223187 | 0.19     |
| VSIG4    | 0.121290807 | 0.21569035  | -0.18    |
| VWA1     | 0.980746028 | 0.987156132 | 0.005    |
| VWA2     | 0.113729678 | 0.205086305 | 0.22     |
| WARS     | 0.069544006 | 0.143178837 | 0.115    |
| WIPF1    | 0.000995393 | 0.005143979 | -0.35    |
| WNT5A    | 4.18E-08    | 1.07E-05    | 1.075    |
| WNT5B    | 0.636557846 | 0.739290409 | -0.01    |
| WWTR1    | 0.113371172 | 0.204919723 | 0.15     |
| ZC3H12A  | 0.000548185 | 0.003248394 | 0.455    |
| ZCCHC24  | 0.934603532 | 0.968566244 | 0.075    |
| ZEB1     | 0.011513253 | 0.032480501 | 0.205    |
| ZEB2     | 0.331963851 | 0.455640524 | -0.14    |
| ZFPM2    | 0.027922087 | 0.069519648 | -0.335   |
| ZFYVE16  | 0.209484313 | 0.32132056  | 0.06     |
| ZFYVE9   | 0.013624832 | 0.037737844 | 0.115    |
| AGK      | 0.973046479 | 0.981973511 | 0.01     |
| AMMECR1L | 0.491529088 | 0.613296715 | 0.065    |
| CC2D1B   | 0.092726721 | 0.17763022  | -0.245   |
| CNOT10   | 0.713698852 | 0.803475991 | -0.005   |
| CNOT4    | 0.538260674 | 0.652608351 | -0.01    |
| COG7     | 0.411901166 | 0.535749828 | -0.045   |
| DDX50    | 0.940522618 | 0.969857619 | 0.01     |
| DHX16    | 0.490057442 | 0.612571802 | -0.06    |
| DNAJC14  | 0.195806359 | 0.304813407 | -0.03    |
| EDC3     | 0.602158984 | 0.711138677 | 0.055    |
| EIF2B4   | 0.005107055 | 0.017172195 | 0.14     |



|         |             |             |        |
|---------|-------------|-------------|--------|
| ERCC3   | 0.016732591 | 0.045207352 | -0.165 |
| FCF1    | 0.060085377 | 0.128159946 | -0.095 |
| GPATCH3 | 0.000961568 | 0.005141716 | -0.305 |
| HDAC3   | 0.009146698 | 0.027511553 | -0.11  |
| MRPS5   | 0.000995258 | 0.005143979 | 0.19   |
| MTMR14  | 0.003337792 | 0.013057135 | -0.205 |
| NOL7    | 0.000163434 | 0.001310877 | 0.27   |
| NUBP1   | 0.539870926 | 0.652608351 | 0.035  |
| PRPF38A | 0.094875547 | 0.180457501 | -0.065 |
| SAP130  | 0.004206045 | 0.015424599 | 0.29   |
| SF3A3   | 0.605510459 | 0.711848619 | -0.035 |
| TLK2    | 0.425750985 | 0.548727987 | -0.025 |
| TMUB2   | 0.62932639  | 0.734214122 | -0.04  |
| TRIM39  | 0.089593197 | 0.173770181 | -0.14  |
| USP39   | 0.000648218 | 0.003724836 | 0.215  |
| ZC3H14  | 0.00613306  | 0.019759229 | 0.19   |
| ZKSCAN5 | 0.577473109 | 0.691530784 | 0.155  |
| ZNF143  | 0.100721771 | 0.189160398 | 0.115  |
| ZNF346  | 0.021859489 | 0.056672748 | -0.115 |
