# Supplementary material for: Spatial profiling of gastric cancer patient-matched primary and locoregional metastases reveals principles of tumour dissemination
Source: PubMed Central journal article supplement — Gut. 2020 Nov 23;70(10):1823–32. doi: 10.1136/gutjnl-2020-320805 (PMC8458060; doi:10.1136/gutjnl-2020-320805), 2020-11-23
Supplement: gutjnl-2020-320805supp010.pdf [file gutjnl-2020-320805supp010.pdf]

| Gene     | pval        | qval        | Log2 Fold Change |
|----------|-------------|-------------|------------------|
| AAMP     | 0.895690332 | 0.952598834 | -0.21            |
| ABI3BP   | 0.002302151 | 0.020612283 | 0.465            |
| ACHE     | 0.103542461 | 0.296385483 | -0.16            |
| ACTG2    | 2.99E-07    | 7.68E-05    | 3.195            |
| ACVR1    | 0.071431098 | 0.224504378 | 0.19             |
| ACVR1C   | 0.978209579 | 0.995008423 | 0.14             |
| ACVRL1   | 0.006747504 | 0.042938663 | 0.235            |
| ADAM15   | 0.158715519 | 0.380719469 | 0.285            |
| ADAM17   | 0.978208929 | 0.995008423 | -0.05            |
| ADAM28   | 0.038932876 | 0.152174187 | -0.62            |
| ADAM8    | 0.622964796 | 0.790251882 | 0.085            |
| ADAM9    | 0.122003358 | 0.329623107 | 0.25             |
| ADAMTS1  | 0.180766659 | 0.414256926 | 0.23             |
| ADAMTS12 | 0.009902195 | 0.05703885  | 0.425            |
| ADAMTS8  | 4.60E-05    | 0.001169089 | 1.61             |
| ADAP1    | 0.269811968 | 0.519388039 | 0.075            |
| ADD1     | 0.233702809 | 0.487695826 | 0.11             |
| ADM2     | 0.012213453 | 0.066227879 | -0.36            |
| ADRA2B   | 0.822777921 | 0.915518785 | 0.16             |
| AEBP1    | 0.010738542 | 0.06035531  | 0.465            |
| AGGF1    | 0.117946691 | 0.320915024 | -0.095           |
| AGR2     | 0.529860903 | 0.736120272 | 0.08             |
| AGRN     | 0.85693743  | 0.928047568 | -0.16            |
| AGT      | 0.006849995 | 0.043233572 | 1.02             |
| AHNAK    | 0.006519543 | 0.042542779 | 0.605            |
| AKAP12   | 0.001747074 | 0.016405449 | 0.51             |
| AKAP2    | 0.409929603 | 0.665919397 | 0.05             |
| AKT1     | 0.95208288  | 0.985354963 | -0.085           |
| AKT2     | 0.367391504 | 0.620376005 | 0.055            |
| AKT3     | 0.253556844 | 0.501934205 | 0.07             |
| ALB      | 0.064833867 | 0.21195036  | -0.315           |
| ALDOA    | 0.83128831  | 0.918352939 | 0.08             |
| ALOX5    | 0.029954404 | 0.125352668 | -0.3             |
| AMH      | 0.784746815 | 0.895196237 | -0.03            |
| ANG      | 0.050500474 | 0.181732067 | 0.255            |
| ANGPT1   | 0.281853305 | 0.538528647 | 0.285            |
| ANGPT2   | 0.43147281  | 0.675272487 | -0.15            |
| ANGPTL2  | 0.001368876 | 0.013688762 | 0.71             |
| ANGPTL4  | 0.686032669 | 0.831882134 | -0.175           |
| ANPEP    | 0.019103243 | 0.089148466 | -0.57            |
| ANXA2P2  | 0.412553021 | 0.665966092 | 0.11             |
| AP1M2    | 0.87843088  | 0.944681253 | -0.045           |
| APC      | 0.267444505 | 0.516134751 | 0.09             |
| APOD     | 1.04E-05    | 0.000587404 | 0.985            |
| APOE     | 0.023722987 | 0.104981036 | -0.395           |
| APOH     | 0.336334555 | 0.602273505 | -0.065           |

|          |             |             |        |
|----------|-------------|-------------|--------|
| AQP1     | 0.01546776  | 0.078875334 | 0.355  |
| ARAP2    | 0.146187966 | 0.3690647   | -0.145 |
| AREG     | 0.415668692 | 0.666555101 | 0.215  |
| ARHGAP32 | 0.216977892 | 0.466706424 | 0.28   |
| ARHGDIB  | 0.007218151 | 0.04482239  | -0.36  |
| ASPN     | 9.61E-05    | 0.001946284 | 1.88   |
| ATPIF1   | 0.168627321 | 0.394659687 | 0.22   |
| B3GNT3   | 0.977487042 | 0.995008423 | 0.025  |
| BAD      | 0.844091583 | 0.921918138 | 0.035  |
| BAG2     | 0.000780618 | 0.00871124  | 0.55   |
| BAI1     | 0.296771882 | 0.55735207  | -0.14  |
| BAI3     | 0.240196734 | 0.493041262 | 0.295  |
| BCAS1    | 0.084300547 | 0.254554593 | 0.4    |
| BGN      | 0.914603103 | 0.959711422 | -0.01  |
| BICC1    | 0.016975877 | 0.083261522 | 0.56   |
| BMP4     | 0.000125561 | 0.002417049 | 0.665  |
| BMP5     | 0.355902485 | 0.618220765 | 0.1    |
| BMP7     | 0.262770223 | 0.5109421   | 0.27   |
| BMPER    | 0.238020434 | 0.491355856 | 0.64   |
| BMPR1A   | 0.007932599 | 0.048095284 | 0.36   |
| BMPR1B   | 0.002179684 | 0.019745376 | 0.885  |
| BMPR2    | 0.152356862 | 0.374807616 | 0.205  |
| BNC2     | 0.003722945 | 0.028104585 | 0.645  |
| BRMS1    | 0.814285735 | 0.91210996  | 0.015  |
| BTG1     | 0.001394596 | 0.013767165 | -0.43  |
| C1S      | 0.000216888 | 0.003630519 | 0.81   |
| C3       | 0.0169767   | 0.083261522 | 0.64   |
| C3AR1    | 0.307002663 | 0.566887412 | 0.1    |
| CADM1    | 0.670037944 | 0.820237228 | 0.115  |
| CALCRL   | 0.051147829 | 0.182995465 | 0.205  |
| CALD1    | 6.98E-05    | 0.001581632 | 0.955  |
| CAMK2A   | 0.887055584 | 0.947340915 | 0.22   |
| CAMK2B   | 0.982567013 | 0.998122164 | 0.005  |
| CAMK2D   | 0.385062621 | 0.639034201 | -0.085 |
| CAMP     | 0.382098421 | 0.636830702 | -0.3   |
| CASP8    | 0.212933665 | 0.460595685 | -0.235 |
| CAV1     | 0.000706959 | 0.008374751 | 1.01   |
| CBLC     | 0.437921816 | 0.679843609 | -0.21  |
| CCBE1    | 0.917334554 | 0.959711422 | 0.07   |
| CCDC80   | 0.034043665 | 0.13652928  | 0.195  |
| CCL11    | 3.46E-05    | 0.000987109 | 1.125  |
| CCL21    | 5.79E-06    | 0.000445518 | -2.27  |
| CCL5     | 0.092850229 | 0.274979525 | -0.405 |
| CCL7     | 0.444404846 | 0.682573242 | 0.285  |
| CCL8     | 0.682022676 | 0.828324071 | 0.08   |
| CCR2     | 0.029687831 | 0.12491601  | -0.435 |
| CCR3     | 0.5086187   | 0.727948697 | 0.27   |

|         |             |             |        |
|---------|-------------|-------------|--------|
| CD163   | 0.112758901 | 0.313476029 | 0.145  |
| CD24    | 0.995641396 | 1           | -0.02  |
| CD2AP   | 0.100115637 | 0.290909399 | 0.195  |
| CD34    | 0.002565808 | 0.022198562 | 0.485  |
| CD36    | 0.477608277 | 0.70049214  | -0.11  |
| CD44    | 0.607596094 | 0.781063846 | -0.065 |
| CD46    | 0.098190075 | 0.288573885 | 0.185  |
| CD82    | 0.773464378 | 0.89156822  | -0.01  |
| CDC42   | 0.127466442 | 0.338445381 | 0.17   |
| CDH1    | 0.844093879 | 0.921918138 | -0.095 |
| CDH11   | 7.43E-05    | 0.001635183 | 0.68   |
| CDH13   | 0.415640858 | 0.666555101 | 0.21   |
| CDH2    | 0.120799576 | 0.327519978 | -0.435 |
| CDK14   | 0.262763101 | 0.5109421   | 0.065  |
| CDKN1A  | 0.428301546 | 0.671674522 | 0.005  |
| CDKN2A  | 0.447654896 | 0.682573242 | -0.1   |
| CDS1    | 0.317458583 | 0.580624961 | 0.065  |
| CEACAM1 | 0.694070646 | 0.838986495 | 0.07   |
| CEACAM5 | 0.450938824 | 0.683509635 | -0.005 |
| CEACAM6 | 0.584875656 | 0.769836333 | -0.155 |
| CEP170  | 0.060218238 | 0.203368611 | 0.275  |
| CEP295  | 0.108219948 | 0.305369399 | -0.125 |
| CFP     | 0.191691376 | 0.434124588 | -0.095 |
| CGN     | 0.642405047 | 0.799120691 | 0.18   |
| CHAD    | 0.70622487  | 0.841787553 | 0.18   |
| CHD4    | 0.400153046 | 0.656967687 | 0.055  |
| CHI3L1  | 0.078562196 | 0.241971564 | 0.29   |
| CHP1    | 0.662098142 | 0.813102982 | 0.165  |
| CHP2    | 0.555210641 | 0.751339532 | 0.075  |
| CHRDL1  | 0.835551654 | 0.919106819 | 0.205  |
| CHRNA7  | 0.454215998 | 0.685777095 | -0.03  |
| CIB1    | 0.75965544  | 0.879621158 | 0.05   |
| CKMT1A  | 0.969497052 | 0.995008423 | 0.165  |
| CLDN1   | 0.887053073 | 0.947340915 | -0.155 |
| CLDN3   | 0.172032428 | 0.399005712 | 0.285  |
| CLDN4   | 0.759667605 | 0.879621158 | 0.07   |
| CLDN7   | 0.622962202 | 0.790251882 | -0.13  |
| CLEC2B  | 0.522732426 | 0.733089411 | -0.2   |
| CLEC3B  | 0.4981596   | 0.723741305 | 0.435  |
| CLIC4   | 9.39E-05    | 0.001946284 | 0.685  |
| CLU     | 0.626837595 | 0.79225274  | -0.02  |
| CMA1    | 0.364509386 | 0.618220765 | 0.315  |
| CNN1    | 1.07E-05    | 0.000587404 | 3.565  |
| COL18A1 | 0.006736977 | 0.042938663 | 0.325  |
| COL1A1  | 0.03094389  | 0.127416018 | 0.685  |
| COL1A2  | 0.006737798 | 0.042938663 | 0.99   |
| COL3A1  | 0.000614389 | 0.007755405 | 0.92   |

|          |             |             |        |
|----------|-------------|-------------|--------|
| COL4A1   | 0.730720513 | 0.860328433 | -0.225 |
| COL4A2   | 0.861226966 | 0.930076807 | -0.02  |
| COL4A6   | 2.60E-05    | 0.000799523 | 1.825  |
| COL5A1   | 0.00100683  | 0.010622769 | 0.52   |
| COL5A2   | 4.71E-05    | 0.001169089 | 0.9    |
| COL6A1   | 2.47E-05    | 0.000793173 | 0.94   |
| COL6A2   | 1.80E-05    | 0.000676771 | 0.895  |
| COL6A3   | 0.000501771 | 0.006661437 | 0.68   |
| COL7A1   | 0.004060037 | 0.02950073  | 0.505  |
| COMP     | 0.128850717 | 0.34001207  | 0.445  |
| CREBBP   | 0.299042996 | 0.560250869 | 0.015  |
| CRIP2    | 0.153931121 | 0.377474405 | 0.345  |
| CRISPLD2 | 4.09E-05    | 0.001123762 | 0.81   |
| CSF2RB   | 0.223145535 | 0.474661269 | -0.34  |
| CSPG4    | 1.21E-05    | 0.00062142  | 1      |
| CST7     | 0.080442384 | 0.245803073 | -0.25  |
| CTNNB1   | 0.197197137 | 0.441624516 | 0.05   |
| CTNND1   | 0.491258332 | 0.715064113 | 0.19   |
| CTSG     | 0.10772814  | 0.305369399 | 0.54   |
| CTSH     | 0.105885324 | 0.301969256 | -0.48  |
| CTSK     | 3.52E-06    | 0.000387247 | 0.86   |
| CTSL     | 0.353063401 | 0.618220765 | 0.18   |
| CUL1     | 0.662091049 | 0.813102982 | 0.03   |
| CX3CL1   | 0.160342376 | 0.382580159 | 0.205  |
| CXADR    | 0.505409391 | 0.726054536 | -0.02  |
| CXCL10   | 0.568653975 | 0.760589342 | 0.11   |
| CXCL11   | 0.144686483 | 0.367685121 | 0.33   |
| CXCL12   | 0.917332711 | 0.959711422 | -0.155 |
| CXCL13   | 0.021151398 | 0.096370273 | -0.925 |
| CXCL17   | 0.049865118 | 0.181113872 | 0.36   |
| CXCL8    | 0.005612467 | 0.03790877  | 0.49   |
| CXCR2    | 0.576340365 | 0.76514152  | 0.02   |
| CXCR3    | 0.126127579 | 0.336049258 | -0.14  |
| CXCR4    | 0.005612111 | 0.03790877  | -0.585 |
| CYB561   | 0.364495074 | 0.618220765 | 0.175  |
| CYBB     | 0.077647749 | 0.240129226 | -0.23  |
| CYP1B1   | 0.827029925 | 0.917600862 | 0.155  |
| DAG1     | 0.003349911 | 0.026054866 | 0.24   |
| DCC      | 0.361616538 | 0.618220765 | -0.225 |
| DCN      | 1.52E-05    | 0.000648225 | 0.97   |
| DDR2     | 2.41E-05    | 0.000793173 | 0.8    |
| DENND5A  | 0.018817305 | 0.088374498 | 0.39   |
| DENR     | 0.258124446 | 0.507051092 | 0.095  |
| DESI1    | 0.869818397 | 0.938039448 | -0.025 |
| DICER1   | 0.81003171  | 0.91210996  | -0.015 |
| DLC1     | 0.090361077 | 0.270731632 | 0.215  |
| DLG1     | 0.423986697 | 0.668995403 | 0.055  |

|          |             |             |           |
|----------|-------------|-------------|-----------|
| DLL4     | 0.972070593 | 0.995008423 | 1.00E-18  |
| DPT      | 0.322780053 | 0.583428734 | 0.22      |
| DPYSL3   | 2.19E-05    | 0.000766217 | 0.915     |
| DSC2     | 0.734884984 | 0.862593655 | 0.14      |
| DST      | 0.000491684 | 0.006642052 | 0.475     |
| ECM1     | 0.001006743 | 0.010622769 | 0.63      |
| ECM2     | 0.020544713 | 0.094727118 | 0.335     |
| ECSCR    | 0.116927155 | 0.319269183 | 0.245     |
| EDN1     | 0.242390565 | 0.493041262 | 0.105     |
| EGF      | 0.47422438  | 0.70049214  | -0.16     |
| EGFL7    | 0.882742395 | 0.946673599 | -0.135    |
| EGFR     | 0.017228964 | 0.083447939 | 0.23      |
| EGLN2    | 0.355620514 | 0.618220765 | 0.025     |
| EGLN3    | 0.630710395 | 0.79225274  | 0.115     |
| EIF2AK3  | 0.505112212 | 0.726054536 | -0.085    |
| EIF4E2   | 0.333567387 | 0.598710694 | 0.065     |
| EIF4EBP1 | 0.603781147 | 0.781063846 | 0.08      |
| ELF3     | 0.344628792 | 0.61143818  | 0.055     |
| ELK3     | 0.108963219 | 0.306210506 | 0.11      |
| EMCN     | 0.004202407 | 0.029696735 | 0.53      |
| EMILIN1  | 0.002430709 | 0.021268701 | 0.63      |
| EMILIN3  | 0.739143283 | 0.864954905 | -0.115    |
| EMP3     | 0.0237209   | 0.104981036 | 0.205     |
| ENO1     | 0.353056218 | 0.618220765 | -0.26     |
| ENO2     | 0.099858671 | 0.290909399 | 0.19      |
| ENO3     | 0.624008445 | 0.790273854 | -0.005    |
| ENPEP    | 0.066433094 | 0.21313951  | 0.385     |
| ENPP2    | 0.061726836 | 0.204910239 | -0.2      |
| EP300    | 0.93903776  | 0.974473147 | 0.015     |
| EPAS1    | 0.242387051 | 0.493041262 | 0.045     |
| EPCAM    | 0.780550902 | 0.895196237 | 0.015     |
| EPHA1    | 0.516309575 | 0.730805833 | -0.005    |
| EPHA2    | 0.562556025 | 0.754648326 | 0.19      |
| EPHB1    | 0.702162952 | 0.840848325 | -0.19     |
| EPHB3    | 0.418794838 | 0.667655012 | 0.13      |
| EPHB4    | 0.325467862 | 0.586611379 | 0.195     |
| EPN3     | 0.978209417 | 0.995008423 | 0.13      |
| EPS8L1   | 0.818520535 | 0.91210996  | -0.01     |
| ERBB2    | 0.759667605 | 0.879621158 | -0.025    |
| ERBB2IP  | 0.87842548  | 0.944681253 | -0.05     |
| ERBB3    | 0.630715493 | 0.79225274  | -8.87E-16 |
| EREG     | 0.447661672 | 0.682573242 | -0.285    |
| ERMP1    | 0.459700249 | 0.688656014 | 0.11      |
| ESRP1    | 0.960787286 | 0.991697937 | 0.125     |
| ETV4     | 0.249049422 | 0.498098843 | 0.255     |
| EVI2A    | 0.170313933 | 0.397399178 | -0.1      |
| EVPL     | 0.379130696 | 0.634631817 | -0.055    |

|         |             |             |        |
|---------|-------------|-------------|--------|
| F11R    | 0.240432929 | 0.493041262 | 0.08   |
| F3      | 0.000156662 | 0.002805347 | 0.565  |
| FAM174B | 0.914601748 | 0.959711422 | -0.06  |
| FAP     | 0.004818948 | 0.033428741 | 0.34   |
| FASLG   | 0.545914362 | 0.746632431 | -0.06  |
| FBLN1   | 0.000140335 | 0.002629909 | 0.86   |
| FBLN5   | 0.03336027  | 0.135196882 | 0.43   |
| FBN1    | 0.006412621 | 0.042202722 | 0.5    |
| FBN2    | 0.557232343 | 0.751434158 | -0.075 |
| FBP1    | 0.428301546 | 0.671674522 | 0.035  |
| FERMT2  | 1.41E-05    | 0.000636803 | 0.805  |
| FGF18   | 0.108267332 | 0.305369399 | 0.89   |
| FGF2    | 1.34E-05    | 0.000636803 | 0.83   |
| FGF9    | 0.921670974 | 0.961635027 | 0.2    |
| FGFR1   | 0.00288285  | 0.023614834 | 0.485  |
| FGFR2   | 0.786462013 | 0.895822116 | 0.025  |
| FGFR3   | 0.260452658 | 0.509013413 | -0.05  |
| FGFR4   | 0.172038827 | 0.399005712 | -0.14  |
| FGL2    | 0.000720902 | 0.008410519 | 0.375  |
| FHL1    | 1.76E-05    | 0.000676771 | 1      |
| FIGF    | 0.776362993 | 0.893571756 | 0.175  |
| FLI1    | 0.588632964 | 0.770836165 | 0.04   |
| FLT1    | 0.047364157 | 0.174517789 | 0.325  |
| FLT4    | 0.018010784 | 0.086286459 | -0.56  |
| FMOD    | 0.00036065  | 0.005149849 | 0.42   |
| FN1     | 0.095684666 | 0.282288096 | 0.445  |
| FOXC2   | 0.373230806 | 0.627484106 | -0.26  |
| FOXO4   | 0.607585377 | 0.781063846 | 0.13   |
| FRAS1   | 0.157110425 | 0.380424615 | -0.165 |
| FREM1   | 0.030522715 | 0.126357475 | 0.325  |
| FREM2   | 0.788950532 | 0.897329261 | 0.215  |
| FST     | 0.361623702 | 0.618220765 | 0.34   |
| FSTL1   | 0.009926241 | 0.05703885  | 0.535  |
| FUT3    | 0.028484099 | 0.121175451 | 0.34   |
| FXVD6   | 0.003990915 | 0.02950073  | 0.49   |
| GALNT7  | 0.322780053 | 0.583428734 | 0.26   |
| GATA4   | 0.537035524 | 0.739744818 | -0.105 |
| GDF15   | 0.421959158 | 0.668630471 | 0.435  |
| GDF5    | 0.580192714 | 0.767525924 | -0.01  |
| GDF6    | 0.533432929 | 0.736120272 | -0.02  |
| GIMAP4  | 0.051805612 | 0.182995465 | -0.125 |
| GIMAP6  | 0.123429959 | 0.332311429 | -0.215 |
| GJA5    | 0.151699775 | 0.374807616 | 0.235  |
| GLYR1   | 0.454195796 | 0.685777095 | 0.04   |
| GPI     | 0.201134523 | 0.446321564 | 0.17   |
| GPR124  | 0.355898896 | 0.618220765 | 0.165  |
| GPR56   | 0.219008549 | 0.469739784 | 0.075  |

|          |             |             |        |
|----------|-------------|-------------|--------|
| GPX1     | 1           | 1           | 0.015  |
| GREM1    | 6.84E-08    | 5.05E-05    | 1.975  |
| GRHL2    | 0.805813772 | 0.91210996  | -0.065 |
| GSN      | 0.000512    | 0.006682036 | 0.495  |
| GTF2I    | 0.253574553 | 0.501934205 | 0.175  |
| GZMK     | 0.040489183 | 0.155901272 | -0.46  |
| HAPLN1   | 0.126127579 | 0.336049258 | 0.385  |
| HAS1     | 0.048602828 | 0.17821037  | -0.295 |
| HDAC5    | 0.587945664 | 0.770836165 | 0.015  |
| HDHD3    | 0.599466682 | 0.780382567 | 0.07   |
| HEG1     | 0.012810858 | 0.068033865 | 0.315  |
| HGF      | 0.009168109 | 0.053888884 | 0.375  |
| HIF1A    | 0.00707474  | 0.044289022 | 0.26   |
| HIPK1    | 0.161609555 | 0.382580159 | 0.155  |
| HIPK2    | 0.197297186 | 0.441624516 | 0.11   |
| HK2      | 0.577383488 | 0.765207033 | 0.13   |
| HK3      | 0.068066754 | 0.216576036 | -0.24  |
| HKDC1    | 0.654193855 | 0.807258442 | -0.03  |
| HLADPB1  | 0.320106682 | 0.582706679 | -0.145 |
| HMOX1    | 0.131619402 | 0.343548948 | -0.315 |
| HOXA5    | 0.143184974 | 0.365074272 | 0.245  |
| HOXA7    | 0.698122191 | 0.840848325 | 0.08   |
| HOXB13   | 0.882741526 | 0.946673599 | 0.005  |
| HOXB3    | 0.071433211 | 0.224504378 | 0.19   |
| HPSE     | 0.738950267 | 0.864954905 | -0.045 |
| HRAS     | 0.673993174 | 0.823769435 | -0.04  |
| HSD17B12 | 0.041584126 | 0.158513749 | 0.135  |
| HSP90B1  | 0.253563928 | 0.501934205 | 0.11   |
| HSPB1    | 0.216988181 | 0.466706424 | 0.345  |
| HSPG2    | 0.082349725 | 0.249684465 | 0.19   |
| HUNK     | 0.343039358 | 0.6100238   | 0.15   |
| IBSP     | 0.519182113 | 0.731923484 | 0.265  |
| ICAM1    | 0.680337812 | 0.828324071 | 0.115  |
| ID1      | 0.747677774 | 0.872290737 | -0.01  |
| ID2      | 0.406332125 | 0.663509546 | 0.135  |
| ID4      | 0.024756512 | 0.107697821 | 0.2    |
| IFNG     | 0.515641106 | 0.730805833 | 0.015  |
| IGF1     | 0.082363447 | 0.249684465 | 0.59   |
| IGFBP4   | 0.000578404 | 0.007422854 | 0.75   |
| IGFBP7   | 0.304326335 | 0.566178833 | 0.28   |
| IL10RA   | 0.043254991 | 0.163278168 | -0.205 |
| IL11     | 0.057296329 | 0.196087128 | 0.41   |
| IL13RA2  | 0.531007301 | 0.736120272 | 0.065  |
| IL15     | 0.223152441 | 0.474661269 | -0.145 |
| IL18     | 0.018041714 | 0.086286459 | -0.32  |
| IL1A     | 0.990993956 | 1           | 0.03   |
| IL1B     | 0.533448197 | 0.736120272 | 0.31   |

|          |             |             |        |
|----------|-------------|-------------|--------|
| IL1RL1   | 0.050507354 | 0.181732067 | 0.285  |
| IL1RN    | 0.607598773 | 0.781063846 | -0.17  |
| IL6      | 0.364505808 | 0.618220765 | -0.765 |
| ILK      | 0.011610051 | 0.063402406 | 0.55   |
| INHBA    | 0.001988618 | 0.018448626 | 0.61   |
| INHBE    | 0.759672818 | 0.879621158 | -0.005 |
| IRF6     | 0.32273673  | 0.583428734 | 0.15   |
| ISL1     | 0.00406114  | 0.02950073  | 0.675  |
| ISLR     | 0.00288285  | 0.023614834 | 0.525  |
| ITGA1    | 0.0240608   | 0.105266002 | 0.405  |
| ITGA11   | 0.077652178 | 0.240129226 | 0.58   |
| ITGA2    | 0.242383538 | 0.493041262 | 0.29   |
| ITGA3    | 0.284281615 | 0.540499697 | 0.1    |
| ITGA5    | 0.021151398 | 0.096370273 | 0.805  |
| ITGA6    | 0.114390287 | 0.313476029 | 0.135  |
| ITGA7    | 0.01882262  | 0.088374498 | 0.5    |
| ITGA8    | 0.025825476 | 0.110475648 | 0.655  |
| ITGA9    | 0.304413035 | 0.566178833 | 0.13   |
| ITGAM    | 0.718429254 | 0.848470728 | -0.08  |
| ITGB1    | 0.000345954 | 0.005122785 | 0.335  |
| ITGB1BP1 | 0.140217794 | 0.35870425  | 0.22   |
| ITGB2    | 0.033354647 | 0.135196882 | -0.36  |
| ITGB3    | 0.000361158 | 0.005149849 | 0.5    |
| ITGB4    | 0.289246034 | 0.547235839 | 0.275  |
| ITGB6    | 0.491108928 | 0.715064113 | 0.09   |
| ITGB7    | 0.011608807 | 0.063402406 | -0.675 |
| ITGB8    | 0.000462413 | 0.006358185 | 0.52   |
| ITM2A    | 0.523628681 | 0.733089411 | -0.13  |
| JAG1     | 0.422887064 | 0.668630471 | 0.095  |
| JAM2     | 0.00153265  | 0.014754158 | 0.625  |
| JAM3     | 0.00131655  | 0.013338734 | 0.32   |
| JUN      | 0.101686042 | 0.29325188  | 0.175  |
| KCNJ8    | 0.337328484 | 0.602651817 | 0.15   |
| KDM1A    | 0.205005511 | 0.452356614 | 0.065  |
| KDR      | 0.178990074 | 0.411410021 | 0.125  |
| KIAA1462 | 0.235844147 | 0.488193727 | -0.12  |
| KISS1    | 1           | 1           | 0.07   |
| KLK3     | 0.376177195 | 0.631059782 | -0.2   |
| KRAS     | 0.412539074 | 0.665966092 | 0.05   |
| KRIT1    | 0.642382711 | 0.799120691 | 0.07   |
| KRT1     | 0.526288942 | 0.735467305 | 0.055  |
| KRT14    | 0.576334291 | 0.76514152  | 0.08   |
| KRT19    | 0.844093879 | 0.921918138 | 0.03   |
| KRT7     | 0.001197419 | 0.012293504 | 0.43   |
| LAD1     | 0.763825367 | 0.883101401 | 0.15   |
| LAMA1    | 0.904340555 | 0.956514799 | 0.04   |
| LAMA3    | 0.194242506 | 0.437329619 | 0.34   |



|          |             |             |          |
|----------|-------------|-------------|----------|
| LAMA4    | 0.008599664 | 0.051732357 | 0.59     |
| LAMA5    | 0.051809106 | 0.182995465 | 0.405    |
| LAMB3    | 0.212947319 | 0.460595685 | 0.225    |
| LAMC1    | 1.85E-05    | 0.000676771 | 0.465    |
| LAMC2    | 0.186168215 | 0.424133467 | 0.155    |
| LDHA     | 0.076722245 | 0.239174609 | 0.325    |
| LEFTY1   | 0.444401448 | 0.682573242 | -0.11    |
| LGALS1   | 0.00265998  | 0.022757606 | 0.76     |
| LHFP     | 1           | 1           | 0.09     |
| LIFR     | 0.041046486 | 0.157242758 | -0.3     |
| LLGL2    | 0.476526748 | 0.70049214  | 1.00E-18 |
| LOX      | 0.007680284 | 0.046937845 | 0.65     |
| LOXL2    | 0.150794864 | 0.374807616 | 0.2      |
| LRG1     | 0.555198837 | 0.751339532 | 0.055    |
| LTBP4    | 0.561016678 | 0.753905142 | 0.13     |
| LUM      | 5.05E-05    | 0.001214618 | 0.77     |
| LY96     | 0.952083237 | 0.985354963 | 0.04     |
| MAF      | 0.7102888   | 0.844018465 | 0.21     |
| MAP2K1   | 0.818529847 | 0.91210996  | 0.06     |
| MAP2K2   | 0.839817477 | 0.921918138 | 0.025    |
| MAP2K4   | 0.682009221 | 0.828324071 | 0.025    |
| MAP3K7   | 0.98649011  | 0.998596418 | 0.01     |
| MAPK1    | 0.156593596 | 0.380424615 | 0.1      |
| MAPK3    | 0.155511523 | 0.380139278 | 0.18     |
| MAPKAPK3 | 0.64241001  | 0.799120691 | -0.1     |
| MCAM     | 0.000221819 | 0.003634058 | 0.545    |
| MED1     | 0.784743683 | 0.895196237 | -0.015   |
| MED23    | 0.59240972  | 0.774457529 | -0.13    |
| MEG3     | 0.000627036 | 0.007787383 | 0.635    |
| MEOX2    | 0.175485503 | 0.404752709 | 0.15     |
| MET      | 0.033354647 | 0.135196882 | 0.16     |
| MFAP4    | 1.02E-05    | 0.000587404 | 1.12     |
| MGAT5    | 0.533420713 | 0.736120272 | -0.115   |
| MGP      | 0.004203823 | 0.029696735 | 0.775    |
| MISP     | 0.206981566 | 0.454062126 | 0.245    |
| MMP1     | 0.016235316 | 0.080652859 | 0.385    |
| MMP10    | 0.235854632 | 0.488193727 | 0.11     |
| MMP12    | 0.447661672 | 0.682573242 | -0.625   |
| MMP13    | 0.701141651 | 0.840848325 | 0.15     |
| MMP14    | 0.004131364 | 0.029696735 | 0.685    |
| MMP17    | 0.818527187 | 0.91210996  | 0.06     |
| MMP2     | 1.31E-07    | 5.05E-05    | 1.585    |
| MMP24    | 0.212950732 | 0.460595685 | 0.355    |
| MMP3     | 0.005246847 | 0.036072073 | 0.61     |
| MMP9     | 0.114395692 | 0.313476029 | -0.33    |
| MMRN2    | 0.015754157 | 0.079807245 | 0.225    |
| MPDZ     | 0.000851386 | 0.009365247 | 0.46     |

|        |             |             |        |
|--------|-------------|-------------|--------|
| MRC1   | 0.296757466 | 0.55735207  | 0.27   |
| MS4A4A | 0.053808919 | 0.189191177 | 0.295  |
| MS4A6A | 0.457506703 | 0.688047191 | -0.055 |
| MT3    | 0.364509386 | 0.618220765 | -0.195 |
| MTA1   | 0.965140268 | 0.993526747 | -0.025 |
| MTBP   | 0.272186579 | 0.522652532 | 0.065  |
| MTDH   | 0.544270885 | 0.74570922  | -0.07  |
| MTOR   | 0.861027537 | 0.930076807 | 0.005  |
| MUC1   | 0.246823942 | 0.497140949 | 0.215  |
| MYC    | 0.242678751 | 0.493041262 | -0.21  |
| MYCL   | 0.444391253 | 0.682573242 | -0.07  |
| MYH11  | 7.88E-07    | 0.000151669 | 3.08   |
| MYLK   | 1.45E-06    | 0.000223126 | 1.515  |
| MYO1D  | 0.152356862 | 0.374807616 | 0.135  |
| MYO5C  | 0.44764812  | 0.682573242 | 0.175  |
| NAA15  | 0.619078742 | 0.790251882 | 0.045  |
| NAP1L3 | 0.133009385 | 0.344413162 | 0.245  |
| NCAM1  | 0.007680738 | 0.046937845 | 0.6    |
| NCL    | 0.638491773 | 0.799120691 | 0.065  |
| NDNF   | 0.003068207 | 0.024868629 | 0.755  |
| NDP    | 0.253574553 | 0.501934205 | -0.3   |
| NDRG1  | 0.569948117 | 0.760589342 | -0.11  |
| NF1    | 0.467499453 | 0.694931619 | 0.085  |
| NF2    | 0.599957953 | 0.780382567 | 0.055  |
| NFAT5  | 0.317454972 | 0.580624961 | 0.055  |
| NFATC2 | 0.010398306 | 0.058872764 | -0.265 |
| NFKB1  | 0.967416709 | 0.994540542 | -0.01  |
| NID2   | 0.017231458 | 0.083447939 | 0.565  |
| NME1   | 0.713721243 | 0.845485165 | -0.015 |
| NME4   | 0.013540546 | 0.070926668 | 0.35   |
| NODAL  | 0.60760681  | 0.781063846 | -0.05  |
| NOS2   | 0.260456214 | 0.509013413 | -0.425 |
| NOS3   | 0.432741016 | 0.675883534 | 0.025  |
| NOTCH1 | 0.016202358 | 0.080652859 | 0.14   |
| NOX5   | 1           | 1           | 0.07   |
| NPR1   | 0.199215836 | 0.443371441 | 0.365  |
| NR3C1  | 0.655689352 | 0.807809282 | -0.03  |
| NR4A1  | 0.917334554 | 0.959711422 | -0.095 |
| NR4A3  | 0.755515197 | 0.879621158 | 0.045  |
| NRCAM  | 0.464165211 | 0.691309888 | 0.275  |
| NRP1   | 0.561022917 | 0.753905142 | 0.045  |
| NRP2   | 0.004568566 | 0.031979965 | 0.83   |
| NRXN1  | 0.065628455 | 0.21195036  | 0.315  |
| NRXN3  | 0.003659067 | 0.027895856 | 0.685  |
| NTRK1  | 0.607604131 | 0.781063846 | 0.125  |
| OAS1   | 0.206971402 | 0.454062126 | 0.085  |
| OCLN   | 0.279407035 | 0.53518263  | 0.08   |

|         |             |             |          |
|---------|-------------|-------------|----------|
| OGN     | 0.000182584 | 0.003124223 | 1.305    |
| OLFML2B | 0.38209487  | 0.636830702 | -0.04    |
| OVOL2   | 0.258135102 | 0.507051092 | 0.36     |
| P3H1    | 0.114398395 | 0.313476029 | 0.245    |
| P3H2    | 0.051809106 | 0.182995465 | 0.305    |
| PCOLCE  | 0.140220752 | 0.35870425  | 0.305    |
| PDCD10  | 0.670026362 | 0.820237228 | 0.015    |
| PDCL3   | 0.38508035  | 0.639034201 | 0.22     |
| PDGFA   | 0.41880178  | 0.667655012 | 0.15     |
| PDGFC   | 0.00156183  | 0.014847023 | 0.66     |
| PDGFRB  | 0.003178367 | 0.025493155 | 0.285    |
| PDK1    | 0.043258112 | 0.163278168 | -0.335   |
| PDPN    | 0.000178655 | 0.003124223 | 1.31     |
| PEBP4   | 0.481002017 | 0.704128427 | 0.21     |
| PECAM1  | 0.361609374 | 0.618220765 | 0.195    |
| PFKFB1  | 0.421952232 | 0.668630471 | -0.145   |
| PFKFB4  | 0.622964796 | 0.790251882 | 0.2      |
| PGK1    | 0.459696674 | 0.688656014 | -0.195   |
| PIK3CA  | 0.416354542 | 0.666555101 | 0.125    |
| PIK3CD  | 0.009769311 | 0.056987645 | -0.27    |
| PIK3CG  | 0.010914512 | 0.060899816 | -0.33    |
| PIK3R1  | 0.221080472 | 0.472866565 | 0.14     |
| PIK3R2  | 1           | 1           | 0.025    |
| PIK3R5  | 0.406722735 | 0.663509546 | -0.08    |
| PIK3R6  | 0.06578719  | 0.21195036  | -0.27    |
| PITX2   | 0.474227677 | 0.70049214  | -0.1     |
| PKM     | 0.301847955 | 0.564133314 | 0.11     |
| PKN1    | 0.818529847 | 0.91210996  | 1.00E-18 |
| PKNOX1  | 0.718445344 | 0.848470728 | -0.03    |
| PLA2G10 | 0.19232818  | 0.43428944  | 0.215    |
| PLA2G2A | 0.034508812 | 0.137677643 | 0.49     |
| PLA2G2D | 0.010244577 | 0.058432034 | -0.67    |
| PLA2G3  | 0.973853121 | 0.995008423 | 0.105    |
| PLAU    | 5.67E-05    | 0.001323109 | 0.57     |
| PLAUR   | 0.416380524 | 0.666555101 | 0.115    |
| PLCG1   | 0.986923829 | 0.998596418 | 0.015    |
| PLCG2   | 0.000400318 | 0.005604456 | -0.89    |
| PLEKHO1 | 0.358748752 | 0.618220765 | 0.19     |
| PLS1    | 0.055179479 | 0.192254293 | 0.18     |
| PLXDC1  | 0.10011817  | 0.290909399 | 0.375    |
| PLXNC1  | 0.897847577 | 0.953576047 | 0.005    |
| PLXND1  | 0.054263543 | 0.189922402 | 0.1      |
| PMP22   | 0.000124081 | 0.002417049 | 0.425    |
| PNPLA6  | 1           | 1           | 0.11     |
| POPDC3  | 0.710290864 | 0.844018465 | 0.19     |
| POSTN   | 0.018549104 | 0.088165496 | 0.27     |
| PPFIBP2 | 0.713160929 | 0.845485165 | -0.06    |

|          |             |             |        |
|----------|-------------|-------------|--------|
| PPL      | 0.161975496 | 0.382580159 | 0.325  |
| PPP1R16B | 0.046758921 | 0.17393415  | -0.36  |
| PPP2CB   | 0.002343469 | 0.020741052 | 0.205  |
| PPP2R1A  | 0.844092731 | 0.921918138 | -0.095 |
| PPP3R1   | 0.284288801 | 0.540499697 | -0.085 |
| PRELP    | 0.611411125 | 0.783338713 | 0.195  |
| PRF1     | 0.533435982 | 0.736120272 | -0.1   |
| PRKCB    | 0.003653908 | 0.027895856 | -1.17  |
| PRKCG    | 0.312205709 | 0.57511578  | 0.22   |
| PRKCZ    | 0.747219265 | 0.872290737 | 0.065  |
| PROK2    | 0.630715493 | 0.79225274  | 0.19   |
| PROM1    | 0.012932771 | 0.068207078 | 0.31   |
| PRR15L   | 0.394093498 | 0.649790135 | 0.13   |
| PRSS22   | 0.394078633 | 0.649790135 | 0.1    |
| PRSS8    | 0.584872855 | 0.769836333 | 0.01   |
| PTEN     | 0.45090167  | 0.683509635 | 0.025  |
| PTGDS    | 0.001007094 | 0.010622769 | -0.915 |
| PTGIS    | 0.060967711 | 0.204910239 | 0.515  |
| PTGS2    | 0.422875984 | 0.668630471 | 0.27   |
| PTK2     | 0.14535377  | 0.368165799 | 0.15   |
| PTK2B    | 0.002857445 | 0.023614834 | -0.37  |
| PTK6     | 0.734838232 | 0.862593655 | -0.015 |
| PTPRB    | 0.135876283 | 0.349915512 | 0.26   |
| PTPRC    | 0.111912877 | 0.313356057 | -0.315 |
| PTPRM    | 0.036269704 | 0.143957071 | 0.38   |
| PTRF     | 0.502193911 | 0.726054536 | 0.005  |
| PTTG1    | 0.773462623 | 0.89156822  | -0.035 |
| PTX3     | 0.588638526 | 0.770836165 | -0.085 |
| PXDN     | 0.161972365 | 0.382580159 | 0.23   |
| PYCARD   | 0.696958204 | 0.840848325 | 0.02   |
| QKI      | 0.057292614 | 0.196087128 | 0.14   |
| RAB25    | 0.505112212 | 0.726054536 | 0.14   |
| RAC1     | 0.189822787 | 0.431160902 | 0.11   |
| RAC2     | 0.000324178 | 0.004908072 | -0.43  |
| RAF1     | 0.114024924 | 0.313476029 | 0.095  |
| RAMP1    | 0.000639505 | 0.007816177 | 0.72   |
| RAMP2    | 0.547909554 | 0.746708596 | 0.275  |
| RB1      | 0.037398005 | 0.147674172 | 0.115  |
| RBL1     | 0.023718814 | 0.104981036 | -0.265 |
| RBL2     | 0.339054859 | 0.604333892 | -0.07  |
| RBM47    | 0.501808599 | 0.726054536 | 0.115  |
| RBPJ     | 0.040493837 | 0.155901272 | 0.23   |
| RBX1     | 0.149487975 | 0.373719938 | 0.055  |
| RELN     | 0.515647371 | 0.730805833 | -0.13  |
| RGCC     | 0.161937922 | 0.382580159 | 0.06   |
| RHOA     | 0.995641363 | 1           | -0.005 |
| RNH1     | 0.611405808 | 0.783338713 | 0.095  |

|          |             |             |          |
|----------|-------------|-------------|----------|
| ROBO4    | 0.622964796 | 0.790251882 | -0.11    |
| ROCK1    | 0.044391646 | 0.166739354 | 0.2      |
| ROCK2    | 0.064142517 | 0.211067258 | 0.305    |
| RORA     | 0.856934262 | 0.928047568 | 0.05     |
| RORB     | 0.038862635 | 0.152174187 | 0.47     |
| RPS27A   | 0.064039306 | 0.211067258 | -0.265   |
| RPS6KB1  | 0.358741581 | 0.618220765 | 0.07     |
| RPS6KB2  | 0.551530411 | 0.750315223 | -0.08    |
| RRAS     | 0.163614854 | 0.38527045  | 0.305    |
| RTN4     | 0.00068343  | 0.008222514 | 0.305    |
| RUNX1    | 0.015992755 | 0.080486412 | 0.57     |
| RUNX1T1  | 0.012716654 | 0.068033865 | 0.51     |
| S100A14  | 0.818525856 | 0.91210996  | -0.21    |
| S100A7   | 0.793160339 | 0.900786815 | -0.06    |
| S1PR1    | 0.581126771 | 0.767525924 | 0.12     |
| SACS     | 0.04952615  | 0.180735239 | 0.26     |
| SAMSN1   | 0.009165508 | 0.053888884 | -0.325   |
| SCG2     | 0.904340555 | 0.956514799 | 0.04     |
| SCNN1A   | 4.60E-05    | 0.001169089 | 0.675    |
| SDC4     | 0.818528517 | 0.91210996  | 0.035    |
| SELE     | 0.065628455 | 0.21195036  | 0.215    |
| SEMA3E   | 0.012811572 | 0.068033865 | 0.485    |
| SERINC5  | 0.528541944 | 0.736120272 | -0.085   |
| SERPINA1 | 0.477604992 | 0.70049214  | -0.305   |
| SERPINE1 | 0.512128307 | 0.73025703  | -0.025   |
| SERPINF1 | 0.088309421 | 0.265618181 | 0.3      |
| SERPING1 | 0.003293056 | 0.025874012 | 0.725    |
| SERPINH1 | 0.320110292 | 0.582706679 | 0.17     |
| SET      | 0.887046377 | 0.947340915 | -0.05    |
| SETD2    | 0.829063952 | 0.918352939 | 1.00E-18 |
| SFRP1    | 0.014083729 | 0.072781689 | 0.62     |
| SFRP2    | 4.23E-06    | 0.000407464 | 1.725    |
| SH2B3    | 0.908666503 | 0.958456449 | 0.015    |
| SH2D3A   | 0.450891535 | 0.683509635 | -0.055   |
| SH3YL1   | 0.54064416  | 0.74338572  | 0.015    |
| SHB      | 0.835550444 | 0.919106819 | 0.02     |
| SIRT1    | 0.477595136 | 0.70049214  | -0.02    |
| SKP1     | 0.000236356 | 0.003791546 | 0.275    |
| SLC12A6  | 0.646318321 | 0.801399184 | 0.17     |
| SLC2A1   | 0.317458583 | 0.580624961 | -0.405   |
| SLC35A3  | 0.599982441 | 0.780382567 | 0.055    |
| SLC37A1  | 0.326064507 | 0.586611379 | 0.105    |
| SLC44A4  | 0.784745249 | 0.895196237 | 0.125    |
| SLIT2    | 0.047369114 | 0.174517789 | 0.59     |
| SLPI     | 0.165279352 | 0.388003357 | 0.245    |
| SMAD1    | 0.065602289 | 0.21195036  | 0.15     |
| SMAD2    | 0.229296849 | 0.483722119 | 0.115    |

|         |             |             |          |
|---------|-------------|-------------|----------|
| SMAD3   | 0.13327073  | 0.344413162 | -0.165   |
| SMAD4   | 0.434675068 | 0.677529964 | 0.025    |
| SMAD5   | 0.101233281 | 0.293043707 | 0.195    |
| SMAD9   | 0.0015329   | 0.014754158 | 0.755    |
| SMC3    | 0.81427077  | 0.91210996  | 1.00E-18 |
| SMOC1   | 0.2271254   | 0.480457578 | 0.175    |
| SMURF1  | 0.130355733 | 0.342573088 | 0.14     |
| SMURF2  | 0.060182776 | 0.203368611 | 0.135    |
| SNAI1   | 0.364491495 | 0.618220765 | -0.15    |
| SNAI2   | 0.002778823 | 0.023513121 | 0.785    |
| SNAI3   | 0.068066754 | 0.216576036 | -0.31    |
| SNRPF   | 0.306988938 | 0.566887412 | 0.23     |
| SOD1    | 0.267451643 | 0.516134751 | 0.19     |
| SORD    | 0.034038325 | 0.13652928  | 0.24     |
| SOX17   | 0.701125793 | 0.840848325 | 0.14     |
| SOX2    | 0.347424747 | 0.613571227 | 0.29     |
| SOX9    | 0.011610051 | 0.063402406 | 0.335    |
| SP1     | 0.367377206 | 0.620376005 | 0.015    |
| SPARC   | 0.057298187 | 0.196087128 | 0.455    |
| SPARCL1 | 5.49E-06    | 0.000445518 | 1.425    |
| SPDEF   | 0.019382074 | 0.089904802 | 0.49     |
| SPHK2   | 0.406342629 | 0.663509546 | -0.105   |
| SPINK5  | 0.557229204 | 0.751434158 | 0.285    |
| SPINT1  | 0.891371316 | 0.949316616 | 0.025    |
| SPOCK3  | 0.960787871 | 0.991697937 | 0.09     |
| SPP1    | 0.963987296 | 0.993526747 | -0.095   |
| SRC     | 0.818521865 | 0.91210996  | -0.02    |
| SRF     | 0.001026101 | 0.010676993 | 0.295    |
| SRGN    | 0.246802789 | 0.497140949 | -0.085   |
| SRPK2   | 0.835551654 | 0.919106819 | -0.05    |
| SRPX2   | 0.024059747 | 0.105266002 | 0.245    |
| SSTR2   | 0.428291209 | 0.671674522 | -0.155   |
| ST14    | 0.212293238 | 0.460595685 | 0.115    |
| STAB1   | 0.555204739 | 0.751339532 | 0.02     |
| STAB2   | 0.025051044 | 0.107988363 | -0.415   |
| STAT1   | 0.470847029 | 0.698559176 | -0.065   |
| STAT3   | 0.519150937 | 0.731923484 | 0.065    |
| SULF1   | 0.003235708 | 0.025685521 | 0.57     |
| SV2B    | 0.113152948 | 0.313476029 | -0.225   |
| SYK     | 0.157101139 | 0.380424615 | -0.455   |
| SYNE1   | 0.266198669 | 0.516134751 | 0.185    |
| TACSTD2 | 0.006100879 | 0.040497211 | 0.375    |
| TAL1    | 0.289253229 | 0.547235839 | -0.17    |
| TBX1    | 0.006100499 | 0.040497211 | -0.835   |
| TBX4    | 0.827032465 | 0.917600862 | 0.245    |
| TBXA2R  | 0.91908309  | 0.960236064 | -0.06    |
| TCEB1   | 0.808239494 | 0.91210996  | -0.055   |

|           |             |             |        |
|-----------|-------------|-------------|--------|
| TCEB2     | 0.225210553 | 0.477719355 | 0.095  |
| TCF20     | 0.939037306 | 0.974473147 | -0.045 |
| TCF3      | 0.547909554 | 0.746708596 | 0.005  |
| TCF4      | 0.175568058 | 0.404752709 | 0.095  |
| TDGF1     | 0.784749948 | 0.895196237 | 0.065  |
| TEK       | 0.039977087 | 0.15546645  | 0.36   |
| TF        | 0.186178067 | 0.424133467 | -0.08  |
| TFDP1     | 0.573634332 | 0.764184145 | 0.05   |
| TFPI2     | 0.784748382 | 0.895196237 | 0.265  |
| TGFB1     | 0.205029166 | 0.452356614 | -0.13  |
| TGFB2     | 0.046163467 | 0.172552766 | 0.59   |
| TGFBI     | 0.030521474 | 0.126357475 | 0.43   |
| TGFBR2    | 0.508612375 | 0.727948697 | -0.115 |
| THBS1     | 0.015288615 | 0.078481556 | 0.365  |
| THBS2     | 0.233713974 | 0.487695826 | 0.125  |
| THBS4     | 3.22E-05    | 0.000954393 | 2.245  |
| THY1      | 0.000750174 | 0.008621404 | 0.385  |
| TIE1      | 0.456274012 | 0.687536182 | 0.08   |
| TIMP1     | 0.622964796 | 0.790251882 | -0.04  |
| TIMP2     | 0.000266329 | 0.004185166 | 0.71   |
| TIMP4     | 0.678014901 | 0.827371591 | 0.295  |
| TJP2      | 0.091412107 | 0.272819079 | 0.135  |
| TJP3      | 0.70622696  | 0.841787553 | 0.215  |
| TLR4      | 0.133292367 | 0.344413162 | 0.195  |
| TMC6      | 0.0089717   | 0.053552008 | -0.385 |
| TMEM100   | 0.000780547 | 0.00871124  | 0.74   |
| TMEM30B   | 0.852651093 | 0.927318279 | 0.115  |
| TMPRSS2   | 0.061739189 | 0.204910239 | 0.28   |
| TMPRSS4   | 0.409440844 | 0.665919397 | 0.115  |
| TMPRSS6   | 0.904341265 | 0.956514799 | 0.06   |
| TNC       | 0.306999764 | 0.566887412 | 0.065  |
| TNF       | 0.029687831 | 0.12491601  | -0.345 |
| TNFRSF12A | 0.361577133 | 0.618220765 | 0.29   |
| TNFRSF1A  | 0.092453438 | 0.274861573 | 0.115  |
| TNFSF10   | 0.151693255 | 0.374807616 | -0.165 |
| TNFSF12   | 0.437925234 | 0.679843609 | 0.17   |
| TNFSF13   | 0.847829641 | 0.923965132 | -0.01  |
| TNMD      | 0.512128307 | 0.73025703  | 0.07   |
| TNN       | 0.102391677 | 0.294185043 | 0.535  |
| TNS1      | 3.43E-06    | 0.000387247 | 0.975  |
| TNXB      | 0.505118566 | 0.726054536 | 0.22   |
| TOM1L1    | 0.158715519 | 0.380719469 | 0.135  |
| TP53      | 0.810047003 | 0.91210996  | -0.03  |
| TPM2      | 0.002179518 | 0.019745376 | 1.71   |
| TPSB2     | 0.00032508  | 0.004908072 | 0.63   |
| TPSD1     | 0.464165211 | 0.691309888 | 0.175  |
| TSHR      | 0.986924512 | 0.998596418 | 0.185  |

|          |             |             |        |
|----------|-------------|-------------|--------|
| TSPAN1   | 0.291742646 | 0.550592739 | 0.35   |
| TWIST1   | 0.021771638 | 0.098612712 | 0.555  |
| TWIST2   | 0.058745971 | 0.200152201 | 0.275  |
| TXNIP    | 0.131616522 | 0.343548948 | -0.25  |
| TYMP     | 0.246781634 | 0.497140949 | -0.04  |
| UBA52    | 0.607585377 | 0.781063846 | -0.12  |
| UTS2     | 0.397149658 | 0.653429993 | -0.155 |
| VAMP8    | 0.247279199 | 0.497140949 | -0.13  |
| VASH1    | 0.642407529 | 0.799120691 | 0.015  |
| VAV2     | 0.928045063 | 0.966975235 | -0.01  |
| VAV3     | 0.212950732 | 0.460595685 | -0.69  |
| VCAM1    | 0.388065841 | 0.64260365  | -0.09  |
| VCAN     | 0.061726836 | 0.204910239 | 0.395  |
| VEGFA    | 0.8913689   | 0.949316616 | -0.14  |
| VEGFB    | 0.070448139 | 0.223230727 | 0.115  |
| VEGFC    | 0.653205241 | 0.807258442 | 0.055  |
| VEZF1    | 0.003853758 | 0.028809646 | 0.145  |
| VHL      | 0.025103788 | 0.107988363 | -0.165 |
| VIM      | 0.690053774 | 0.835442462 | 0.055  |
| VIT      | 0.705325098 | 0.841787553 | 0.015  |
| VPS13A   | 0.353049035 | 0.618220765 | 0.125  |
| VSIG4    | 0.199229245 | 0.443371441 | 0.455  |
| VWA1     | 0.635434109 | 0.796879909 | 0.09   |
| VWA2     | 0.934691268 | 0.972584157 | 0.085  |
| WARS     | 0.441148    | 0.682573242 | 0.025  |
| WIPF1    | 0.523635294 | 0.733089411 | -0.105 |
| WNT5A    | 7.79E-05    | 0.001666205 | 0.805  |
| WNT5B    | 0.519950838 | 0.731923484 | 0.075  |
| WWTR1    | 0.00014345  | 0.002629909 | 0.62   |
| ZC3H12A  | 0.347424747 | 0.613571227 | 0.12   |
| ZCCHC24  | 0.013961759 | 0.072638882 | 0.63   |
| ZEB1     | 7.68E-06    | 0.000537454 | 0.805  |
| ZEB2     | 0.972986458 | 0.995008423 | 0.02   |
| ZFPM2    | 0.722167452 | 0.851560395 | 0.23   |
| ZFYVE16  | 0.074166468 | 0.232147073 | 0.03   |
| ZFYVE9   | 0.149211697 | 0.373719938 | 0.145  |
| AGK      | 0.124742529 | 0.334675077 | 0.095  |
| AMMECR1L | 0.41249374  | 0.665966092 | 0.035  |
| CC2D1B   | 0.233695833 | 0.487695826 | -0.07  |
| CNOT10   | 0.235819681 | 0.488193727 | 0.08   |
| CNOT4    | 0.128939642 | 0.34001207  | 0.11   |
| COG7     | 0.231490532 | 0.4870156   | 0.05   |
| DDX50    | 0.702154488 | 0.840848325 | 0.035  |
| DHX16    | 0.080444642 | 0.245803073 | -0.29  |
| DNAJC14  | 0.629090837 | 0.79225274  | -0.025 |
| EDC3     | 0.569942361 | 0.760589342 | -0.07  |
| EIF2B4   | 0.057124793 | 0.196087128 | 0.11   |



|         |             |             |        |
|---------|-------------|-------------|--------|
| ERCC3   | 0.542139276 | 0.744112732 | -0.045 |
| FCF1    | 0.912990894 | 0.959711422 | -0.075 |
| GPATCH3 | 0.25426094  | 0.502002368 | -0.21  |
| HDAC3   | 0.651614781 | 0.806661385 | -0.035 |
| MRPS5   | 0.487796246 | 0.712719373 | 0.08   |
| MTMR14  | 0.158221379 | 0.380719469 | -0.11  |
| NOL7    | 0.357598829 | 0.618220765 | 0.06   |
| NUBP1   | 0.848367985 | 0.923965132 | -0.055 |
| PRPF38A | 0.444381058 | 0.682573242 | -0.095 |
| SAP130  | 0.369515222 | 0.622596764 | 0.115  |
| SF3A3   | 0.249024703 | 0.498098843 | 0.1    |
| TLK2    | 0.856923702 | 0.928047568 | -0.075 |
| TMUB2   | 0.147716522 | 0.371704974 | 0.155  |
| TRIM39  | 0.516279507 | 0.730805833 | -0.11  |
| USP39   | 0.463094427 | 0.691309888 | -0.03  |
| ZC3H14  | 0.022070282 | 0.099380803 | 0.16   |
| ZKSCAN5 | 0.83128583  | 0.918352939 | -0.005 |
| ZNF143  | 0.905654714 | 0.956590027 | -0.005 |
| ZNF346  | 0.646323238 | 0.801399184 | 0.115  |
