# Supplementary material for: Spatial profiling of gastric cancer patient-matched primary and locoregional metastases reveals principles of tumour dissemination
Source: HighWire-hosted journal article supplement (doi:10.1136/gutjnl-2020-320805), 2020-11-23
Supplement: gutjnl-2020-320805supp011_data_supplement.pdf [file gutjnl-2020-320805supp011_data_supplement.pdf]

| Patient Code | ITH group |
|--------------|-----------|
| TH313        | ithhigh   |
| TH308        | ithhigh   |
| TH301        | ithhigh   |
| TH311        | ithhigh   |
| TH293        | ithlow    |
| TH286        | ithlow    |
| TH195        | ithlow    |
| TH263        | ithhigh   |
| TH82         | ithlow    |
| TH211        | ithhigh   |
| TH271        | ithlow    |
| TH112        | ithlow    |
| TH245        | ithhigh   |
| TH257        | ithlow    |
| TH126        | ithlow    |
| TH375        | ithlow    |
| TH316        | ithlow    |
| TH357        | ithhigh   |
| TH351        | ithhigh   |
| TH377        | ithlow    |
| TH325        | ithlow    |
| TH366        | ithlow    |
| TH339        | ithlow    |
| TH347        | ithlow    |
| TH689        | ithlow    |
| TH358        | ithlow    |
| TH691        | ithlow    |
| TH705        | ithlow    |
| TH765        | ithhigh   |
| TH657        | ithhigh   |
| TH630        | ithhigh   |
| TH201        | ithhigh   |
| TH391        | ithlow    |
| TH752        | ithhigh   |
| TH370        | ithlow    |
| TH439        | ithlow    |
| TH660        | ithlow    |
| TH449        | ithhigh   |
| TH684        | ithhigh   |
| TH418        | ithhigh   |
| TH420        | ithhigh   |
| TH737        | ithlow    |
| TH276        | ithlow    |
| TH309        | ithhigh   |
| TH128        | ithlow    |
| TH387        | ithhigh   |
| TH266        | ithlow    |
| TH314        | ithhigh   |
| TH803        | ithhigh   |
| TH730        | ithhigh   |

|        |         |
|--------|---------|
| TH659  | ithlow  |
| TH329  | ithlow  |
| TH196  | ithhigh |
| TH679  | ithhigh |
| TH194  | ithhigh |
| TH300  | ithhigh |
| TH306  | ithhigh |
| TH282  | ithhigh |
| TH295  | ithhigh |
| TH183  | ithlow  |
| TH712  | ithhigh |
| TH1000 | ithlow  |

\* two GC only had one subregion included and therefore SD was not calculable and was not assigned an ITH group
