# Supplementary material for: Spatial profiling of gastric cancer patient-matched primary and locoregional metastases reveals principles of tumour dissemination
Source: PubMed Central journal article supplement — Gut. 2020 Nov 23;70(10):1823–32. doi: 10.1136/gutjnl-2020-320805 (PMC8458060; doi:10.1136/gutjnl-2020-320805), 2020-11-23
Supplement: gutjnl-2020-320805supp012.pdf [file gutjnl-2020-320805supp012.pdf]

**Supplementary Table S11.** Comparison of clinical characteristics between ITH<sub>high</sub> and ITH<sub>low</sub> groups

| Characteristics                | ITH Groups                   |                             | P-value |
|--------------------------------|------------------------------|-----------------------------|---------|
|                                | ITH <sub>high</sub><br>n (%) | ITH <sub>low</sub><br>n (%) |         |
| <b>Age, years (median)</b>     |                              |                             |         |
|                                | 73                           | 71                          | 0.86    |
| <b>Gender</b>                  |                              |                             |         |
| Male                           | 26 (84)                      | 20 (65)                     | 0.15    |
| Female                         | 5 (16)                       | 11 (35)                     |         |
| <b>Lauren's classification</b> |                              |                             |         |
| Diffuse                        | 2 (6)                        | 1 (3)                       | 0.61    |
| Intestinal                     | 28 (90)                      | 30 (97)                     |         |
| Mixed                          | 1 (3)                        | 0 (0)                       |         |
| <b>T Stage</b>                 |                              |                             |         |
| 2                              | 4 (13)                       | 3 (10)                      | 0.88    |
| 3                              | 11 (35)                      | 10 (32)                     |         |
| 4                              | 16 (52)                      | 18 (58)                     |         |
| <b>N Stage</b>                 |                              |                             |         |
| I                              | 4 (13)                       | 6 (19)                      | 0.84    |
| II                             | 16 (52)                      | 14 (45)                     |         |
| III                            | 11 (35)                      | 11 (35)                     |         |
| <b>Grade</b>                   |                              |                             |         |
| 1                              | 1 (3)                        | 1 (3)                       | 0.97    |
| 2                              | 15 (48)                      | 14 (45)                     |         |
| 3                              | 15 (48)                      | 16 (52)                     |         |
| <b>Location</b>                |                              |                             |         |
| Proximal                       | 10 (32)                      | 11 (35)                     | 0.72    |
| Mid                            | 8 (26)                       | 5 (16)                      |         |
| Distal                         | 10 (32)                      | 13 (42)                     |         |
| Others                         | 3 (10)                       | 2 (6)                       |         |

Fisher test

\* two GC only had one subregion included in NanoString analysis, and therefore could not be categorized
