# Supplementary material for: Spatial profiling of gastric cancer patient-matched primary and locoregional metastases reveals principles of tumour dissemination
Source: PubMed Central journal article supplement — Gut. 2020 Nov 23;70(10):1823–32. doi: 10.1136/gutjnl-2020-320805 (PMC8458060; doi:10.1136/gutjnl-2020-320805), 2020-11-23
Supplement: gutjnl-2020-320805supp013.pdf [file gutjnl-2020-320805supp013.pdf]

| Gene     | Standard Deviation |
|----------|--------------------|
| MTOR     | 0.12553731         |
| PRPF38A  | 0.141472605        |
| EIF2B4   | 0.154700091        |
| DDX50    | 0.156333027        |
| SMC3     | 0.161420017        |
| NFAT5    | 0.166316903        |
| MAP2K1   | 0.166585267        |
| KDM1A    | 0.16904912         |
| RPS6KB1  | 0.170330192        |
| FCF1     | 0.170391706        |
| MAP3K7   | 0.170660513        |
| EIF4E2   | 0.171572093        |
| TCEB1    | 0.175363093        |
| CNOT10   | 0.178975095        |
| SMAD1    | 0.179164705        |
| NAA15    | 0.179904998        |
| SETD2    | 0.180182498        |
| HDAC3    | 0.183971158        |
| AMMECR1L | 0.184195031        |
| CHD4     | 0.186678211        |
| SF3A3    | 0.186697697        |
| CNOT4    | 0.189434633        |
| MTMR14   | 0.189734199        |
| SMAD4    | 0.192451524        |
| TLK2     | 0.192702667        |
| DLG1     | 0.19336621         |
| COG7     | 0.193422331        |
| SP1      | 0.194364189        |
| PPP3R1   | 0.196430217        |
| ERBB2IP  | 0.201473001        |
| RAF1     | 0.206887192        |
| CUL1     | 0.207514271        |
| VEZF1    | 0.207579584        |
| SMAD3    | 0.208159809        |
| TFDP1    | 0.208834504        |
| VAV2     | 0.210269344        |
| ADAM17   | 0.210687138        |
| SMURF2   | 0.211437666        |
| MRPS5    | 0.212428684        |
| TMUB2    | 0.212560675        |
| SRPK2    | 0.216217428        |
| MAP2K4   | 0.216345366        |
| VHL      | 0.219735582        |
| SMURF1   | 0.221242495        |
| PLCG1    | 0.221688351        |
| EP300    | 0.221792349        |

|          |             |
|----------|-------------|
| MGAT5    | 0.222050228 |
| CDC42    | 0.2230598   |
| DICER1   | 0.225358787 |
| RBX1     | 0.228272533 |
| ZFYVE16  | 0.22831803  |
| PTEN     | 0.228595789 |
| PDCD10   | 0.228799406 |
| NF2      | 0.23091035  |
| TP53     | 0.232683696 |
| RB1      | 0.232729172 |
| TCF20    | 0.2346075   |
| PPP2CB   | 0.235117302 |
| AGK      | 0.235416298 |
| RBL2     | 0.236877159 |
| SERINC5  | 0.236970019 |
| DAG1     | 0.239130305 |
| ZC3H14   | 0.239226151 |
| AKT2     | 0.241582669 |
| SKP1     | 0.241681289 |
| TNFRSF1A | 0.24209213  |
| USP39    | 0.242428861 |
| ZFYVE9   | 0.243946612 |
| MAPK1    | 0.246026025 |
| KRAS     | 0.247322298 |
| AGGF1    | 0.24828681  |
| SIRT1    | 0.249138236 |
| PIK3CA   | 0.249489236 |
| EGLN2    | 0.250625842 |
| WARS     | 0.251263395 |
| SRF      | 0.25299939  |
| UBA52    | 0.257474114 |
| SET      | 0.257879419 |
| VEGFB    | 0.261008687 |
| RBPJ     | 0.262083595 |
| ROCK1    | 0.262289207 |
| CEP295   | 0.265129366 |
| NFKB1    | 0.265321754 |
| HIPK1    | 0.265688986 |
| DNAJC14  | 0.265894127 |
| SMAD5    | 0.269064729 |
| C3AR1    | 0.269665125 |
| HIPK2    | 0.272375314 |
| PLXND1   | 0.272494171 |
| RTN4     | 0.273175768 |
| ERCC3    | 0.273270227 |
| GLYR1    | 0.273972894 |
| CREBBP   | 0.275821426 |

|          |             |
|----------|-------------|
| TRIM39   | 0.277026072 |
| HSD17B12 | 0.277398589 |
| EPHB4    | 0.278313081 |
| EIF2AK3  | 0.278328028 |
| DESI1    | 0.28029     |
| PTTG1    | 0.286119874 |
| CASP8    | 0.286573268 |
| EGFR     | 0.288611421 |
| SH2B3    | 0.288937271 |
| GPX1     | 0.288986458 |
| MYO1D    | 0.289820057 |
| AKAP2    | 0.290083052 |
| APC      | 0.290889405 |
| MTA1     | 0.292039633 |
| EPAS1    | 0.292475634 |
| EDC3     | 0.293406708 |
| MTDH     | 0.293949264 |
| HRAS     | 0.294145379 |
| RNH1     | 0.294611161 |
| CTNNB1   | 0.294772168 |
| TCEB2    | 0.295971038 |
| BMPR1A   | 0.296644061 |
| RGCC     | 0.297284811 |
| CIB1     | 0.297759301 |
| STAT3    | 0.30046101  |
| RAC1     | 0.300621115 |
| PRKCZ    | 0.301874923 |
| NME4     | 0.304052446 |
| MED1     | 0.306273607 |
| SMAD2    | 0.307513635 |
| SPHK2    | 0.309417324 |
| ITGB1    | 0.309638972 |
| PTK2B    | 0.311395572 |
| NOS3     | 0.312017342 |
| ID2      | 0.312186436 |
| TOM1L1   | 0.312470231 |
| ERBB3    | 0.313188658 |
| IRF6     | 0.313841903 |
| ROCK2    | 0.317141256 |
| ACVRL1   | 0.317265405 |
| LAMC1    | 0.317333606 |
| MAP2K2   | 0.319224844 |
| HDHD3    | 0.319575295 |
| CD46     | 0.319764519 |
| KRIT1    | 0.320762731 |
| CD82     | 0.322114497 |
| RBL1     | 0.323386344 |

|           |             |
|-----------|-------------|
| NR3C1     | 0.323796267 |
| QKI       | 0.323844527 |
| OCLN      | 0.325574153 |
| HDAC5     | 0.325716579 |
| RPS27A    | 0.325800015 |
| JUN       | 0.326690504 |
| CD2AP     | 0.327155922 |
| KDR       | 0.32722948  |
| F11R      | 0.327509355 |
| NOTCH1    | 0.328187736 |
| NUBP1     | 0.329041515 |
| GTF2I     | 0.329301489 |
| EPHA1     | 0.329367373 |
| NF1       | 0.32983061  |
| ELK3      | 0.330381954 |
| STAT1     | 0.330622755 |
| ADM2      | 0.331586917 |
| TNFSF10   | 0.332592541 |
| DHX16     | 0.333210908 |
| NME1      | 0.333431771 |
| PLXNC1    | 0.333540664 |
| PTK2      | 0.333560337 |
| EMP3      | 0.334013448 |
| SH2D3A    | 0.334365037 |
| ANG       | 0.335344072 |
| MET       | 0.335901441 |
| GRHL2     | 0.335977544 |
| SHB       | 0.33723943  |
| TNFRSF12A | 0.338396915 |
| ACVR1     | 0.338427737 |
| BAD       | 0.338753714 |
| SAP130    | 0.338868618 |
| TJP2      | 0.33943166  |
| RORA      | 0.340169894 |
| RHOA      | 0.342282576 |
| TYMP      | 0.342381307 |
| MMRN2     | 0.343141834 |
| FLT1      | 0.34324495  |
| ERBB2     | 0.343895503 |
| ZNF143    | 0.3445615   |
| ITGA3     | 0.344576913 |
| ITGA9     | 0.344612428 |
| MED23     | 0.344662912 |
| MTBP      | 0.345160519 |
| DENR      | 0.345515892 |
| DENND5A   | 0.34563249  |
| EVPL      | 0.345901906 |

|         |             |
|---------|-------------|
| SRC     | 0.346063288 |
| DST     | 0.346362016 |
| GPR56   | 0.347132232 |
| PTPRM   | 0.347749173 |
| MAPK3   | 0.348924662 |
| SLC12A6 | 0.349532505 |
| ADD1    | 0.350933362 |
| FOXO4   | 0.351515391 |
| HEG1    | 0.351725615 |
| TCF4    | 0.352727239 |
| JAM3    | 0.354157439 |
| ENO2    | 0.354178673 |
| PKM     | 0.354257127 |
| TMEM30B | 0.354498275 |
| CDKN1A  | 0.355370417 |
| RAB25   | 0.355468027 |
| RPS6KB2 | 0.355941227 |
| OAS1    | 0.35599124  |
| SOD1    | 0.356498129 |
| ERMP1   | 0.356523026 |
| BTG1    | 0.356760404 |
| WIPF1   | 0.357539386 |
| PMP22   | 0.358594883 |
| ZNF346  | 0.358878032 |
| GPI     | 0.359105425 |
| RBM47   | 0.359800562 |
| MYO5C   | 0.360016356 |
| TCF3    | 0.361360993 |
| CDS1    | 0.361508855 |
| PPP2R1A | 0.361985336 |
| FGFR4   | 0.363180946 |
| SACS    | 0.363523963 |
| PIK3R2  | 0.366166899 |
| IL15    | 0.367309138 |
| PDCL3   | 0.367586139 |
| ENO1    | 0.367881956 |
| SLC37A1 | 0.367899386 |
| FRAS1   | 0.368056852 |
| CD163   | 0.368597162 |
| VAMP8   | 0.368625542 |
| ZC3H12A | 0.369767088 |
| PIK3R1  | 0.36985175  |
| BMP2R2  | 0.369900686 |
| PPFIBP2 | 0.370582828 |
| NCL     | 0.372648074 |
| PTPRB   | 0.37376027  |
| SAMSN1  | 0.374108417 |

|         |             |
|---------|-------------|
| ICAM1   | 0.374156058 |
| ITGA6   | 0.374718299 |
| LRG1    | 0.375516311 |
| CYB561  | 0.376193001 |
| ETV4    | 0.376937743 |
| ENPP2   | 0.377283784 |
| HSP90B1 | 0.377524603 |
| PRR15L  | 0.378069799 |
| ITGAM   | 0.37819295  |
| CEP170  | 0.378279757 |
| MYC     | 0.37863935  |
| CEACAM1 | 0.380643469 |
| ESRP1   | 0.381055777 |
| SOX9    | 0.38123269  |
| SORD    | 0.381294452 |
| HK2     | 0.381310675 |
| EDN1    | 0.381400503 |
| MS4A4A  | 0.381968545 |
| HKDC1   | 0.381991261 |
| CLEC2B  | 0.382117521 |
| ATPIF1  | 0.383006266 |
| CALCRL  | 0.383056782 |
| TLR4    | 0.383394409 |
| ADAP1   | 0.384353189 |
| HMOX1   | 0.384472281 |
| PDGFA   | 0.384889782 |
| DLL4    | 0.386038726 |
| CADM1   | 0.386123417 |
| AKT3    | 0.386806383 |
| VPS13A  | 0.387808904 |
| NOL7    | 0.389793921 |
| HIF1A   | 0.390275211 |
| FLI1    | 0.390648672 |
| PYCARD  | 0.391550009 |
| GIMAP4  | 0.391822551 |
| LAMA3   | 0.393077586 |
| PTK6    | 0.393393087 |
| AKT1    | 0.394946922 |
| WNT5B   | 0.396482693 |
| DSC2    | 0.396491042 |
| DLC1    | 0.396800211 |
| ENO3    | 0.397004396 |
| CXADR   | 0.397624158 |
| CAMK2D  | 0.398965538 |
| LTBP4   | 0.400418007 |
| HSPG2   | 0.403349965 |
| P3H1    | 0.405210098 |

|          |             |
|----------|-------------|
| COL18A1  | 0.405312902 |
| HUNK     | 0.405984728 |
| TNFSF13  | 0.407268229 |
| BRMS1    | 0.407576205 |
| EVI2A    | 0.408878935 |
| ANGPT2   | 0.408998687 |
| CD34     | 0.410160057 |
| SDC4     | 0.410166612 |
| OVOL2    | 0.410879984 |
| IL18     | 0.410949245 |
| TIE1     | 0.411239846 |
| PIK3R5   | 0.411836466 |
| NFATC2   | 0.411885529 |
| GATA4    | 0.413069912 |
| ITGB8    | 0.414929682 |
| PLXDC1   | 0.415216567 |
| TJP3     | 0.416545811 |
| CGN      | 0.41663441  |
| LDHA     | 0.417272888 |
| VEGFA    | 0.418069944 |
| CLIC4    | 0.419241648 |
| LLGL2    | 0.419732063 |
| CTNND1   | 0.420283539 |
| FMOD     | 0.420424457 |
| TGFBR2   | 0.420436199 |
| GIMAP6   | 0.421618437 |
| PNPLA6   | 0.422383862 |
| MPDZ     | 0.422600261 |
| AQP1     | 0.422840199 |
| HPSE     | 0.423203453 |
| ARHGAP32 | 0.424671157 |
| CDK14    | 0.424926456 |
| CYBB     | 0.425652513 |
| ALDOA    | 0.425944454 |
| PGK1     | 0.426481548 |
| NRP1     | 0.426610671 |
| PDGFRB   | 0.427492208 |
| SRGN     | 0.427692701 |
| TGFB1    | 0.428143362 |
| LAD1     | 0.428505666 |
| PIK3CG   | 0.429448711 |
| TMC6     | 0.429641615 |
| EIF4EBP1 | 0.430633811 |
| SPINT1   | 0.431522927 |
| IL10RA   | 0.43232107  |
| CLDN3    | 0.432492585 |
| PRF1     | 0.43286112  |

|          |             |
|----------|-------------|
| MCAM     | 0.434330351 |
| VIT      | 0.434821353 |
| VWA1     | 0.435047888 |
| PIK3CD   | 0.436417801 |
| CX3CL1   | 0.436839009 |
| CKMT1A   | 0.437443593 |
| BAG2     | 0.43757551  |
| EMCN     | 0.437718589 |
| ZKSCAN5  | 0.437730595 |
| FGFR1    | 0.438135144 |
| SRPX2    | 0.438827871 |
| ALOX5    | 0.43982768  |
| FAM174B  | 0.440746457 |
| PLS1     | 0.442355426 |
| PRSS22   | 0.442867916 |
| SYK      | 0.443033508 |
| ZEB1     | 0.443673765 |
| ITGB1BP1 | 0.444164048 |
| HOXB3    | 0.4456669   |
| GPATCH3  | 0.445785746 |
| LIFR     | 0.446054294 |
| JAG1     | 0.446915315 |
| SNAI1    | 0.448724211 |
| ID4      | 0.44882343  |
| LAMC2    | 0.450394908 |
| SNRPF    | 0.450910911 |
| PLAUR    | 0.450993937 |
| FGL2     | 0.451017168 |
| CD36     | 0.451219479 |
| VASH1    | 0.452819307 |
| PKN1     | 0.454098193 |
| MAPKAPK3 | 0.454161085 |
| FGFR2    | 0.454300508 |
| THY1     | 0.454632791 |
| RAC2     | 0.454637917 |
| WWTR1    | 0.454660913 |
| AAMP     | 0.455688964 |
| ADAMTS12 | 0.455716628 |
| PROM1    | 0.45666966  |
| HLADPB1  | 0.46017643  |
| EGLN3    | 0.460464644 |
| B3GNT3   | 0.463804115 |
| PRSS8    | 0.465900364 |
| VEGFC    | 0.467788574 |
| ANXA2P2  | 0.467790342 |
| SLC2A1   | 0.470059913 |
| ECM2     | 0.471361955 |



|          |             |
|----------|-------------|
| CDH11    | 0.471676559 |
| ISL1     | 0.471862781 |
| PDK1     | 0.471958193 |
| LAMA5    | 0.47262118  |
| MISP     | 0.47300905  |
| EGFL7    | 0.474007324 |
| TNFSF12  | 0.474171356 |
| CLDN7    | 0.475503901 |
| VWA2     | 0.476120459 |
| LY96     | 0.477216752 |
| PLEKHO1  | 0.477285414 |
| CHP1     | 0.477507877 |
| ITGA1    | 0.47942012  |
| ITGB3    | 0.479535076 |
| ADAM9    | 0.481264944 |
| BMP4     | 0.482418964 |
| MS4A6A   | 0.482752102 |
| KCNJ8    | 0.483057529 |
| RUNX1    | 0.484369501 |
| ILK      | 0.485882799 |
| ST14     | 0.486889498 |
| ZEB2     | 0.488080065 |
| AGRN     | 0.488325067 |
| AHNAK    | 0.488497329 |
| EPN3     | 0.489339446 |
| FGFR3    | 0.494885656 |
| TAL1     | 0.495106504 |
| PKNOX1   | 0.495169435 |
| CDH13    | 0.496070271 |
| RRAS     | 0.496168447 |
| ARAP2    | 0.496495072 |
| TMPRSS2  | 0.498970409 |
| CTSH     | 0.499557594 |
| MAF      | 0.500443471 |
| ANGPT1   | 0.504216875 |
| ELF3     | 0.504230185 |
| FBLN5    | 0.504797602 |
| HOXA5    | 0.506256669 |
| GSN      | 0.5062698   |
| ITGB2    | 0.506544047 |
| PPP1R16B | 0.507091071 |
| NR4A3    | 0.507918403 |
| TEK      | 0.508117255 |
| ID1      | 0.5081331   |
| CST7     | 0.508572093 |
| FERMT2   | 0.51027295  |
| NDRG1    | 0.510726239 |

|          |             |
|----------|-------------|
| LHFP     | 0.510746677 |
| SH3YL1   | 0.511291265 |
| CHRNA7   | 0.511759657 |
| CXCR3    | 0.514157412 |
| CDH1     | 0.515361669 |
| HGF      | 0.515760447 |
| MMP14    | 0.516171224 |
| SERPINH1 | 0.516868956 |
| KIAA1462 | 0.518992996 |
| LOXL2    | 0.519965529 |
| HOXB13   | 0.520463364 |
| HK3      | 0.521393039 |
| ITGB4    | 0.521435783 |
| CC2D1B   | 0.522701083 |
| C1S      | 0.523661936 |
| CSF2RB   | 0.523895196 |
| TWIST2   | 0.524266371 |
| ACVR1C   | 0.525661467 |
| VIM      | 0.525752787 |
| VCAM1    | 0.526430001 |
| CDKN2A   | 0.526698677 |
| ECSCR    | 0.527709199 |
| RAMP2    | 0.528629702 |
| IL1RL1   | 0.529269233 |
| CD44     | 0.529932097 |
| PCOLCE   | 0.533988166 |
| SOX17    | 0.536419229 |
| ADAM8    | 0.537330227 |
| ACHE     | 0.537416562 |
| AEBP1    | 0.538610075 |
| EPS8L1   | 0.538721425 |
| ARHGDIB  | 0.539195969 |
| CSPG4    | 0.53948294  |
| TNF      | 0.539741264 |
| CRISPLD2 | 0.541001286 |
| CCR2     | 0.543370533 |
| PLAU     | 0.543435317 |
| ECM1     | 0.546803831 |
| ITGA7    | 0.546935707 |
| GALNT7   | 0.548231178 |
| NAP1L3   | 0.548426649 |
| PTPRC    | 0.549589612 |
| EPHB3    | 0.549597045 |
| TNC      | 0.550142484 |
| NR4A1    | 0.550157675 |
| KRT19    | 0.550301638 |
| STAB1    | 0.550717378 |

|         |             |
|---------|-------------|
| FXVD6   | 0.550891012 |
| DDR2    | 0.550960034 |
| PLA2G10 | 0.552987952 |
| COL6A1  | 0.553612652 |
| FSTL1   | 0.554745517 |
| AKAP12  | 0.556313786 |
| FASLG   | 0.557729015 |
| COL5A1  | 0.55854243  |
| PECAM1  | 0.559374155 |
| ISLR    | 0.561490217 |
| FAP     | 0.561921674 |
| PPL     | 0.562655209 |
| CLU     | 0.565258355 |
| SMAD9   | 0.565802663 |
| RUNX1T1 | 0.567013164 |
| CTSK    | 0.56718561  |
| ITGA2   | 0.568210849 |
| SPINK5  | 0.568805163 |
| MMP17   | 0.568877817 |
| ADAM15  | 0.569769698 |
| CXCL10  | 0.5699227   |
| COL6A3  | 0.57105356  |
| S1PR1   | 0.57131884  |
| ROBO4   | 0.571472604 |
| AMH     | 0.573519958 |
| NRCAM   | 0.574001629 |
| TGFB2   | 0.574601828 |
| FBP1    | 0.575033049 |
| POSTN   | 0.575072431 |
| NPR1    | 0.575562389 |
| COL5A2  | 0.578700339 |
| CCL5    | 0.578828812 |
| SLC35A3 | 0.579132796 |
| EPCAM   | 0.579302748 |
| PTGS2   | 0.579390773 |
| FGF2    | 0.580773102 |
| CLDN4   | 0.581432075 |
| SCNN1A  | 0.582418438 |
| PDGFC   | 0.583792342 |
| TACSTD2 | 0.584093319 |
| COL4A1  | 0.584727739 |
| CTSL    | 0.585063822 |
| CHI3L1  | 0.586965951 |
| ITGA8   | 0.587598206 |
| ADAMTS1 | 0.587945944 |
| CBLC    | 0.58847073  |
| SYNE1   | 0.591760116 |

|          |             |
|----------|-------------|
| EPHA2    | 0.592390977 |
| TIMP2    | 0.593390166 |
| PIK3R6   | 0.596298212 |
| SERPING1 | 0.597559078 |
| CCL8     | 0.598389375 |
| PTRF     | 0.598655484 |
| LAMA4    | 0.600906834 |
| CALD1    | 0.602331696 |
| CLEC3B   | 0.607125498 |
| FBN2     | 0.608217081 |
| AP1M2    | 0.608618999 |
| LOX      | 0.609451772 |
| IL1RN    | 0.609540699 |
| OLFML2B  | 0.611061576 |
| TNS1     | 0.611363074 |
| S100A14  | 0.611901255 |
| IGFBP7   | 0.612958575 |
| GPR124   | 0.614120925 |
| BICC1    | 0.616221133 |
| JAM2     | 0.616911764 |
| THBS1    | 0.616923368 |
| MRC1     | 0.61737605  |
| TXNIP    | 0.620261726 |
| MYCL     | 0.620460923 |
| FUT3     | 0.623065125 |
| DPYSL3   | 0.623083708 |
| SPDEF    | 0.624457913 |
| SPARCL1  | 0.625154554 |
| SSTR2    | 0.625723925 |
| ADRA2B   | 0.626005365 |
| FHL1     | 0.626443695 |
| PXDN     | 0.627724424 |
| TMPRSS4  | 0.629253041 |
| FST      | 0.632812289 |
| KISS1    | 0.63355726  |
| CXCL11   | 0.634653376 |
| FLT4     | 0.635983279 |
| CXCR4    | 0.63731713  |
| VSIG4    | 0.637455318 |
| SULF1    | 0.640133686 |
| SMOC1    | 0.640284414 |
| LUM      | 0.640399718 |
| SV2B     | 0.640402134 |
| MEG3     | 0.644014655 |
| ITGA5    | 0.644118134 |
| GZMK     | 0.644336448 |
| RORB     | 0.645082549 |

|          |             |
|----------|-------------|
| CRIP2    | 0.645655965 |
| COL6A2   | 0.645742206 |
| COL4A2   | 0.646780496 |
| CFP      | 0.646970253 |
| RAMP1    | 0.648484316 |
| NTRK1    | 0.650732569 |
| CLDN1    | 0.6511882   |
| ENPEP    | 0.655524374 |
| SEMA3E   | 0.656949558 |
| PFKFB1   | 0.658456522 |
| ITM2A    | 0.660329182 |
| LGALS1   | 0.660988532 |
| TPSD1    | 0.661350806 |
| ABI3BP   | 0.66269611  |
| SNAI3    | 0.663054087 |
| BMPR1B   | 0.664529034 |
| EMILIN1  | 0.668128409 |
| ADAM28   | 0.671127123 |
| APOH     | 0.67214453  |
| GJA5     | 0.673093443 |
| ZFPM2    | 0.67340268  |
| SERPINA1 | 0.675122783 |
| SLPI     | 0.676003643 |
| HSPB1    | 0.677805215 |
| TGFBI    | 0.677852859 |
| C3       | 0.678515456 |
| TMEM100  | 0.679210048 |
| SCG2     | 0.679713096 |
| NRXN3    | 0.681517984 |
| CHP2     | 0.682221259 |
| SELE     | 0.68232474  |
| BNC2     | 0.685115514 |
| DPT      | 0.68682768  |
| IGFBP4   | 0.687521793 |
| FBN1     | 0.689200549 |
| AREG     | 0.689272567 |
| ITGB7    | 0.690788605 |
| VCAN     | 0.690906484 |
| KRT7     | 0.694118143 |
| P3H2     | 0.694467101 |
| CXCR2    | 0.694927084 |
| NRP2     | 0.695801404 |
| CAV1     | 0.697852694 |
| MFAP4    | 0.698143254 |
| DCN      | 0.698488924 |
| FBLN1    | 0.700856224 |
| SERPINE1 | 0.701166557 |

|          |             |
|----------|-------------|
| NDP      | 0.702150921 |
| LAMB3    | 0.703410691 |
| F3       | 0.70521861  |
| FIGF     | 0.70573425  |
| IFNG     | 0.715410382 |
| APOE     | 0.718147251 |
| BGN      | 0.719040459 |
| TDGF1    | 0.719174713 |
| ITGB6    | 0.720032024 |
| ANGPTL2  | 0.720800195 |
| GDF15    | 0.721774055 |
| TIMP4    | 0.722427463 |
| PFKFB4   | 0.723762636 |
| MMP9     | 0.724284341 |
| NCAM1    | 0.724560449 |
| NRXN1    | 0.725677456 |
| MEOX2    | 0.726997681 |
| VAV3     | 0.727610089 |
| FREM1    | 0.728318656 |
| SNAI2    | 0.730741536 |
| CD24     | 0.73096703  |
| SLC44A4  | 0.732745913 |
| BCAS1    | 0.737033206 |
| FGF9     | 0.737121445 |
| SERPINF1 | 0.737183274 |
| MMP24    | 0.738105361 |
| ITGA11   | 0.739372818 |
| MYLK     | 0.743386529 |
| DCC      | 0.743409261 |
| TPSB2    | 0.744681295 |
| INHBA    | 0.745104176 |
| SPARC    | 0.747314702 |
| SOX2     | 0.747668387 |
| PTX3     | 0.748497781 |
| WNT5A    | 0.750352695 |
| TNXB     | 0.750594466 |
| PRKCG    | 0.752497443 |
| THBS2    | 0.754281456 |
| RELN     | 0.755218782 |
| NOX5     | 0.755629015 |
| MT3      | 0.757685314 |
| FOXC2    | 0.759303888 |
| TWIST1   | 0.759966329 |
| BAI3     | 0.760256917 |
| TBX1     | 0.763634593 |
| COL3A1   | 0.765052185 |
| EPHB1    | 0.768590101 |

|         |             |
|---------|-------------|
| TIMP1   | 0.770709364 |
| HOXA7   | 0.772033202 |
| CXCL12  | 0.772175632 |
| TSHR    | 0.773989048 |
| CAMK2B  | 0.776345695 |
| CCBE1   | 0.776619601 |
| NDNF    | 0.777480596 |
| ANPEP   | 0.778285969 |
| CAMP    | 0.786290212 |
| PRELP   | 0.789600824 |
| MUC1    | 0.790676883 |
| COMP    | 0.794788309 |
| GDF6    | 0.799662033 |
| IL1B    | 0.804213956 |
| ZCCHC24 | 0.811508855 |
| CCL7    | 0.815076951 |
| PITX2   | 0.816454891 |
| INHBE   | 0.818043849 |
| TBXA2R  | 0.819683853 |
| COL7A1  | 0.820021076 |
| FGF18   | 0.82043426  |
| CHAD    | 0.822396052 |
| ANGPTL4 | 0.822402392 |
| PLCG2   | 0.823457824 |
| KRT1    | 0.824419164 |
| CCR3    | 0.831067745 |
| IGF1    | 0.841939642 |
| IBSP    | 0.842445797 |
| MGP     | 0.842570388 |
| SFRP1   | 0.842978916 |
| NID2    | 0.852159972 |
| HAS1    | 0.856793472 |
| PLA2G2D | 0.857395215 |
| TMPRSS6 | 0.862761935 |
| SPP1    | 0.86563801  |
| MMP2    | 0.866627578 |
| FREM2   | 0.868974349 |
| UTS2    | 0.871274254 |
| PEBP4   | 0.873906433 |
| BAI1    | 0.875385456 |
| CCDC80  | 0.875707098 |
| LAMA1   | 0.879204133 |
| IL1A    | 0.880362177 |
| EMILIN3 | 0.882097744 |
| TNN     | 0.88371107  |
| CHRD1   | 0.884142854 |
| IL13RA2 | 0.884611557 |

|         |             |
|---------|-------------|
| PTGIS   | 0.885988781 |
| SPOCK3  | 0.88668253  |
| TF      | 0.888424416 |
| ALB     | 0.888446066 |
| MMP13   | 0.89219281  |
| CXCL17  | 0.895236294 |
| BMP5    | 0.901730197 |
| CYP1B1  | 0.901864692 |
| POPDC3  | 0.906069973 |
| COL1A1  | 0.908753037 |
| BMPER   | 0.917830737 |
| PLA2G3  | 0.920644893 |
| FN1     | 0.922036312 |
| KRT14   | 0.925220847 |
| PLA2G2A | 0.927180505 |
| STAB2   | 0.929598656 |
| SLIT2   | 0.929668046 |
| COL1A2  | 0.929846699 |
| EREG    | 0.93865315  |
| CDH2    | 0.939032926 |
| ASPN    | 0.945210413 |
| CCL11   | 0.949167572 |
| CAMK2A  | 0.951530937 |
| APOD    | 0.955499908 |
| TBX4    | 0.961145141 |
| KLK3    | 0.97262361  |
| AGT     | 0.984888423 |
| PTGDS   | 0.993055766 |
| IL6     | 1.001698051 |
| EGF     | 1.002123077 |
| GREM1   | 1.011192804 |
| PROK2   | 1.011635607 |
| MMP1    | 1.013682106 |
| CEACAM5 | 1.023211669 |
| CMA1    | 1.025538868 |
| NODAL   | 1.033996586 |
| GDF5    | 1.036538192 |
| OGN     | 1.053304296 |
| PDPN    | 1.053603876 |
| CTSG    | 1.056865124 |
| HAPLN1  | 1.057033163 |
| AGR2    | 1.072116164 |
| IL11    | 1.075062602 |
| CEACAM6 | 1.093631318 |
| TNMD    | 1.096712882 |
| BMP7    | 1.097805131 |
| NOS2    | 1.099154856 |



|         |             |
|---------|-------------|
| LEFTY1  | 1.104297592 |
| COL4A6  | 1.114130612 |
| SFRP2   | 1.118161738 |
| TSPAN1  | 1.142642969 |
| CXCL8   | 1.16146033  |
| ADAMTS8 | 1.189326981 |
| PRKCB   | 1.189484822 |
| MYH11   | 1.221722144 |
| MMP10   | 1.239733659 |
| TFPI2   | 1.240382781 |
| S100A7  | 1.290029729 |
| TPM2    | 1.299818717 |
| ACTG2   | 1.325987065 |
| MMP12   | 1.379210949 |
| CXCL13  | 1.396893173 |
| CCL21   | 1.443957551 |
| MMP3    | 1.528277758 |
| CNN1    | 1.732114554 |
| THBS4   | 1.799676435 |
