# Supplementary material for: Spatial profiling of gastric cancer patient-matched primary and locoregional metastases reveals principles of tumour dissemination
Source: PubMed Central journal article supplement — Gut. 2020 Nov 23;70(10):1823–32. doi: 10.1136/gutjnl-2020-320805 (PMC8458060; doi:10.1136/gutjnl-2020-320805), 2020-11-23
Supplement: gutjnl-2020-320805supp014.pdf [file gutjnl-2020-320805supp014.pdf]

| Patient Code | Subregion | Tumor/Stroma ratio |
|--------------|-----------|--------------------|
| TH313        | In        | 0.33               |
|              | sup1      | 0.51               |
|              | sup2      | 0.3                |
|              | deep      | 0.28               |
| TH308        | In        | 0.39               |
|              | sup1      | 0.35               |
|              | sup2      | 0.57               |
|              | deep      | 0.32               |
| TH301        | In        | 0.33               |
|              | sup1      | 0.46               |
|              | sup2      | 0.61               |
|              | deep      | 0.45               |
| TH311        | sup1      | 0.28               |
|              | sup2      | 0.33               |
|              | deep      | 0.33               |
| TH293        | In        | 0.32               |
|              | sup1      | 0.43               |
|              | deep      | 0.44               |
| TH286        | In        | 0.28               |
|              | sup1      | 0.38               |
|              | deep      | 0.28               |
| TH195        | sup1      | 0.43               |
|              | sup2      | 0.54               |
|              | deep      | 0.4                |
| TH263        | In        | 0.75               |
|              | sup1      | 0.69               |
|              | sup2      | 0.84               |
|              | deep      | 0.61               |
| TH82         | In        | 0.6                |
|              | sup1      | 0.41               |
|              | sup2      | 0.53               |
|              | deep      | 0.33               |
| TH211        | In        | 0.5                |
|              | sup1      | 0.3                |
|              | sup2      | 0.58               |
|              | deep      | 0.3                |
| TH271        | In        | 0.3                |
|              | sup1      | 0.2                |
|              | sup2      | 0.19               |
|              | deep      | 0.25               |
| TH112        | In        | 0.25               |
|              | sup1      | 0.47               |
|              | sup2      | 0.35               |
|              | deep      | 0.53               |
| TH245        | In        | 0.83               |
|              | sup1      | 0.41               |

|        |      |      |
|--------|------|------|
| TH253  | sup2 | 0.39 |
|        | deep | 0.08 |
| TH257  | ln   | 0.58 |
|        | sup1 | 0.62 |
|        | sup2 | 0.57 |
|        | deep | 0.49 |
| TH126  | ln   | 0.61 |
|        | sup1 | 0.65 |
|        | sup2 | 0.74 |
|        | deep | 0.59 |
| TH375  | ln   | 0.47 |
|        | sup1 | 0.66 |
|        | sup2 | 0.79 |
|        | deep | 0.55 |
| TH316  | ln   | 0.69 |
|        | sup1 | 0.58 |
|        | sup2 | 0.79 |
|        | deep | 0.6  |
| TH357  | ln   | 0.54 |
|        | sup1 | 0.42 |
|        | sup2 | 0.56 |
|        | deep | 0.33 |
| TH351  | ln   | 0.53 |
|        | sup1 | 0.69 |
|        | sup2 | 0.71 |
|        | deep | 0.63 |
| TH377  | sup1 | 0.37 |
|        | sup2 | 0.4  |
|        | deep | 0.35 |
| TH325  | sup1 | 0.62 |
|        | sup2 | 0.61 |
|        | deep | 0.58 |
| TH366  | sup1 | 0.62 |
|        | sup2 | 0.59 |
|        | deep | 0.52 |
| TH339  | ln   | 0.6  |
|        | sup1 | 0.69 |
|        | sup2 | 0.61 |
| TH347  | ln   | 0.49 |
|        | sup2 | 0.57 |
|        | sup1 | 0.62 |
|        | deep | 0.33 |
| TH1000 | ln   | 0.35 |
|        | sup1 | 0.18 |
|        | sup2 | 0.18 |
|        | deep | 0.12 |
|        | ln   | 0.56 |

|       |      |      |
|-------|------|------|
| TH689 | sup1 | 0.53 |
|       | sup2 | 0.58 |
|       | deep | 0.4  |
| TH358 | sup1 | 0.6  |
|       | sup2 | 0.75 |
|       | deep | 0.19 |
| TH691 | ln   | 0.29 |
|       | sup1 | 0.09 |
|       | sup2 | 0.11 |
| TH705 | sup1 | 0.48 |
|       | sup2 | 0.54 |
|       | deep | 0.28 |
| TH765 | ln   | 0.29 |
|       | sup1 | 0.3  |
|       | deep | 0.13 |
| TH657 | ln   | 0.28 |
|       | sup1 | 0.59 |
|       | sup2 | 0.4  |
|       | deep | 0.41 |
| TH630 | ln   | 0.62 |
|       | sup1 | 0.56 |
|       | sup2 | 0.62 |
|       | deep | 0.18 |
| TH201 | ln   | 0.75 |
|       | sup1 | 0.71 |
|       | sup2 | 0.78 |
|       | deep | 0.65 |
| TH391 | sup1 | 0.54 |
|       | sup2 | 0.37 |
|       | deep | 0.41 |
| TH752 | ln   | 0.52 |
|       | sup1 | 0.72 |
|       | deep | 0.36 |
| TH370 | sup1 | 0.52 |
|       | sup2 | 0.34 |
|       | deep | 0.18 |
| TH439 | sup1 | 0.38 |
|       | sup2 | 0.34 |
| TH589 | ln   | 0.2  |
| TH660 | ln   | 0.22 |
|       | sup1 | 0.08 |
|       | sup2 | 0.25 |
|       | deep | 0.08 |
| TH449 | ln   | 0.35 |
|       | sup1 | 0.6  |
|       | sup2 | 0.62 |
|       | deep | 0.51 |

|       |      |      |
|-------|------|------|
| TH684 | ln   | 0.27 |
|       | sup1 | 0.15 |
|       | sup2 | 0.19 |
|       | deep | 0.11 |
| TH418 | ln   | 0.36 |
|       | sup1 | 0.67 |
|       | sup2 | 0.61 |
|       | deep | 0.58 |
| TH420 | ln   | 0.45 |
|       | sup1 | 0.58 |
|       | sup2 | 0.62 |
|       | deep | 0.4  |
| TH737 | ln   | 0.64 |
|       | sup1 | 0.62 |
|       | sup2 | 0.56 |
|       | deep | 0.58 |
| TH276 | ln   | 0.4  |
|       | sup1 | 0.46 |
|       | sup2 | 0.75 |
|       | deep | 0.71 |
| TH309 | ln   | 0.45 |
|       | sup1 | 0.39 |
|       | sup2 | 0.35 |
|       | deep | 0.14 |
| TH128 | ln   | 0.47 |
|       | sup1 | 0.37 |
|       | sup2 | 0.35 |
|       | deep | 0.36 |
| TH387 | ln   | 0.6  |
|       | sup1 | 0.72 |
|       | deep | 0.18 |
| TH266 | ln   | 0.14 |
|       | sup1 | 0.29 |
|       | deep | 0.12 |
| TH314 | ln   | 0.5  |
|       | sup1 | 0.49 |
|       | sup2 | 0.71 |
| TH803 | sup1 | 0.28 |
|       | sup2 | 0.45 |
|       | deep | 0.16 |
| TH730 | ln   | 0.32 |
|       | sup1 | 0.57 |
|       | sup2 | 0.36 |
|       | deep | 0.34 |
| TH659 | ln   | 0.67 |
|       | sup1 | 0.39 |
|       | sup2 | 0.46 |

|       |      |      |
|-------|------|------|
|       | deep | 0.27 |
| TH329 | ln   | 0.69 |
|       | sup1 | 0.25 |
|       | sup2 | 0.31 |
|       | deep | 0.14 |
| TH196 | ln   | 0.4  |
|       | sup1 | 0.56 |
| TH679 | sup1 | 0.49 |
|       | sup2 | 0.32 |
|       | deep | 0.35 |
| TH194 | ln   | 0.56 |
|       | sup1 | 0.3  |
|       | deep | 0.26 |
| TH300 | ln   | 0.97 |
|       | sup1 | 0.53 |
|       | sup2 | 0.64 |
|       | deep | 0.51 |
| TH306 | ln   | 0.32 |
|       | sup1 | 0.31 |
|       | sup2 | 0.26 |
|       | deep | 0.23 |
| TH282 | ln   | 0.68 |
|       | sup1 | 0.64 |
|       | sup2 | 0.76 |
|       | deep | 0.35 |
| TH295 | ln   | 0.47 |
|       | sup1 | 0.68 |
|       | sup2 | 0.75 |
|       | deep | 0.68 |
| TH189 | sup1 | 0.13 |
| TH183 | ln   | 0.32 |
|       | sup1 | 0.15 |
|       | sup2 | 0.34 |
|       | deep | 0.14 |
| TH712 | ln   | 0.54 |
|       | sup2 | 0.34 |
|       | sup1 | 0.25 |
|       | deep | 0.55 |
