# Supplementary material for: Spatial profiling of gastric cancer patient-matched primary and locoregional metastases reveals principles of tumour dissemination
Source: PubMed Central journal article supplement — Gut. 2020 Nov 23;70(10):1823–32. doi: 10.1136/gutjnl-2020-320805 (PMC8458060; doi:10.1136/gutjnl-2020-320805), 2020-11-23
Supplement: gutjnl-2020-320805supp015.pdf [file gutjnl-2020-320805supp015.pdf]

| Gene     | Protein Position | Amino Acid Change | TH313 |       |       | TH316 |       |       | TH347 |       |       | TH630 |       |       | TH691 |       |       | TH730 |       |    | TH752 |       |       | TH1000 |       |       |       |
|----------|------------------|-------------------|-------|-------|-------|-------|-------|-------|-------|-------|-------|-------|-------|-------|-------|-------|-------|-------|-------|----|-------|-------|-------|--------|-------|-------|-------|
|          |                  |                   | Sup   | Deep  | LN    | Sup   | Deep  | LN | Sup   | Deep  | LN    | Sup    | Deep  | LN    |       |
| ABL1     | 1050             | V/M               |       |       |       | 0.137 | 0.295 | 0.255 |       |       |       |       |       |       |       |       |       |       |       |    |       |       |       |        |       |       |       |
| ABL1     | 337              | M/V               |       |       |       | 0.15  | 0.164 | 0.275 |       |       |       |       |       |       |       |       |       |       |       |    |       |       |       |        |       |       |       |
| ABL1     | 989              | K/X               |       |       |       |       |       |       |       |       |       |       |       |       |       |       |       |       |       |    | 0.147 | 0.105 | 0.233 |        |       |       |       |
| ACVR2A   | 435              | K/X               |       |       |       | 0.278 | 0.36  | 0.564 |       |       |       |       |       |       |       |       |       |       |       |    |       |       |       |        |       |       |       |
| AKT3     | 238              | S/L               |       |       |       |       |       |       |       |       |       |       |       |       |       |       |       |       |       |    | 0.12  |       |       |        |       |       |       |
| APC      | 571              | A/V               |       |       |       |       |       |       |       |       |       |       |       |       |       |       |       |       |       |    |       |       |       |        | 0.392 | 0.375 | 0.418 |
| AR       | 457-458          | GG/-              |       |       |       |       | 0.254 |       |       |       |       |       |       |       |       |       |       |       |       |    |       |       |       |        |       |       |       |
| ARID1A   | 454              | Y/*               |       |       |       |       |       |       |       |       |       |       |       |       |       | 0.121 |       |       |       |    |       |       |       |        |       |       |       |
| ARID1B   | 1441             | Q/E               |       |       |       | 0.115 | 0.138 | 0.177 |       |       |       |       |       |       |       |       |       |       |       |    |       |       |       |        |       |       |       |
| ATM      | 1399             | T/N               |       |       |       |       |       |       |       |       |       |       |       |       |       |       | 0.651 | 0.56  | 0.654 |    |       |       |       |        |       |       |       |
| ATM      | 1884             | T/K               |       |       |       | 0.151 | 0.181 | 0.21  |       |       |       |       |       |       |       |       |       |       |       |    |       |       |       |        |       |       |       |
| ATRX     | 979              | E/*               |       |       |       |       |       |       |       |       |       |       |       |       |       |       | 0.173 |       |       |    |       |       |       |        |       |       |       |
| BCL6     | 425              | L/I               |       |       |       | 0.214 | 0.233 | 0.261 |       |       |       |       |       |       |       |       |       |       |       |    |       |       |       |        |       |       |       |
| BRCA2    | 3129             | P/S               |       |       |       | 0.163 | 0.18  | 0.211 |       |       |       |       |       |       |       |       |       |       |       |    |       |       |       |        |       |       |       |
| BRCA2    | 3278             | P/S               |       |       |       | 0.111 | 0.135 |       |       |       |       |       |       |       |       |       |       |       |       |    |       |       |       |        |       |       |       |
| BRCA2    | 583-584          | -/X               |       |       |       |       |       | 0.188 |       |       |       |       |       |       |       |       |       |       |       |    |       |       |       |        |       |       |       |
| BRD4     | 157-158          | FL/L              |       |       |       | 0.122 |       | 0.118 |       |       |       |       |       |       |       |       |       |       |       |    |       |       |       |        |       |       |       |
| CREBBP   | 1879             | Q/*               |       |       |       |       |       |       |       |       |       |       |       |       |       |       | 0.41  | 0.181 |       |    |       |       |       |        |       |       |       |
| DPYD     | 748              | G/C               |       |       |       |       |       |       |       |       |       | 0.243 | 0.122 | 0.192 |       |       |       |       |       |    |       |       |       |        |       |       |       |
| EGFR     | 975              | P/S               |       |       |       |       |       |       |       |       |       | 0.223 | 0.157 | 0.222 |       |       |       |       |       |    |       |       |       |        |       |       |       |
| EPHA5    | 505              | K/T               |       |       |       |       |       |       | 0.229 | 0.217 | 0.143 |       |       |       |       |       |       |       |       |    |       |       |       |        |       |       |       |
| EPHB6    | 1008             | Q/L               |       |       |       |       |       |       |       |       |       | 0.638 | 0.64  | 0.551 |       |       |       |       |       |    |       |       |       |        |       |       |       |
| ERBB4    | 785              | G/D               |       |       |       |       | 0.142 | 0.152 |       |       |       |       |       |       |       |       |       |       |       |    |       |       |       |        |       |       |       |
| FGFR1    | 310              | V/G               |       |       |       | 0.14  | 0.121 | 0.224 |       |       |       |       |       |       |       |       |       |       |       |    |       |       |       |        |       |       |       |
| FGFR2    | 172              | A/T               |       |       |       | 0.19  | 0.234 | 0.404 |       |       |       |       |       |       |       |       |       |       |       |    |       |       |       |        |       |       |       |
| FGFR2    | 3                | S/N               |       |       |       | 0.178 | 0.218 | 0.36  |       |       |       |       |       |       |       |       |       |       |       |    |       |       |       |        |       |       |       |
| FGFR3    | 402              | S/SX              |       |       |       |       | 0.119 | 0.124 |       |       |       |       |       |       |       |       |       |       |       |    |       |       |       |        |       |       |       |
| FGFR3    | 779              | T/TX              |       |       |       | 0.178 | 0.241 | 0.284 |       |       |       |       |       |       |       |       |       |       |       |    |       |       |       |        |       |       |       |
| FLT4     | 446              | T/M               |       |       |       |       | 0.122 | 0.289 |       |       |       |       |       |       |       |       |       |       |       |    |       |       |       |        |       |       |       |
| GATA3    | 234              | F/X               |       |       |       | 0.146 | 0.217 |       |       |       |       |       |       |       |       |       |       |       |       |    |       |       |       |        |       |       |       |
| GNAS     | 453              | P/S               |       |       |       | 0.269 | 0.229 |       |       |       |       |       |       |       |       |       |       |       |       |    |       |       |       |        |       |       |       |
| JAK1     | 860-861          | -/X               |       |       |       | 0.131 | 0.164 | 0.284 |       |       |       |       |       |       |       |       |       |       |       |    |       |       |       |        |       |       |       |
| JAK3     | 474              | C/G               |       |       |       | 0.215 | 0.359 | 0.529 |       |       |       |       |       |       |       |       |       |       |       |    |       |       |       |        |       |       |       |
| KMT2C    | 1557             | S/X               |       |       |       |       | 0.139 | 0.158 |       |       |       |       |       |       |       |       |       |       |       |    |       |       |       |        |       |       |       |
| KMT2C    | 864              | E/G               |       |       |       |       |       |       |       |       |       | 0.109 |       |       |       |       |       |       |       |    |       |       |       |        |       |       |       |
| KMT2D    | 2400             | P/X               |       |       |       | 0.216 | 0.22  | 0.327 |       |       |       |       |       |       |       |       |       |       |       |    |       |       |       |        |       |       |       |
| KMT2D    | 3117             | E/D               |       |       |       |       |       | 0.133 |       |       |       |       |       |       |       |       |       |       |       |    |       |       |       |        |       |       |       |
| KMT2D    | 3420-3421        | I/I               |       |       |       | 0.142 | 0.239 | 0.224 |       |       |       |       |       |       |       |       |       |       |       |    |       |       |       |        |       |       |       |
| MED12    | 433              | Q/R               | 0.338 | 0.361 | 0.399 |       |       |       |       |       |       |       |       |       |       |       |       |       |       |    |       |       |       |        |       |       |       |
| MLH3     | 328-329          | IE/X              |       |       |       |       |       | 0.104 |       |       |       |       |       |       |       |       |       |       |       |    |       |       |       |        |       |       |       |
| MRE11    | 511              | N/X               |       |       |       | 0.376 | 0.46  | 0.523 |       |       |       |       |       |       |       |       |       |       |       |    |       |       |       |        |       |       |       |
| MSH2     | 362              | L/V               |       |       |       |       |       | 0.126 |       |       |       |       |       |       |       |       |       |       |       |    |       |       |       |        |       |       |       |
| MSH2     | 824              | Q/E               |       |       |       |       |       |       |       |       |       |       |       | 0.109 |       |       |       |       |       |    |       |       |       |        |       |       |       |
| MTOR     | 1118             | I/N               |       |       |       | 0.245 | 0.303 | 0.376 |       |       |       |       |       |       |       |       |       |       |       |    |       |       |       |        |       |       |       |
| MTOR     | 1756             | E/D               |       |       |       |       | 0.137 | 0.151 |       |       |       |       |       |       |       |       |       |       |       |    |       |       |       |        |       |       |       |
| NOTCH1   | 450              | E/K               |       |       |       |       | 0.103 |       |       |       |       |       |       |       |       |       |       |       |       |    |       |       |       |        |       |       |       |
| NOTCH4   | 16               | L/LLL             |       |       |       |       |       |       |       |       |       |       |       | 0.239 | 0.237 | 0.248 |       |       |       |    |       | 0.262 | 0.257 | 0.262  |       |       |       |
| NTRK3    | 190              | I/V               |       |       |       |       |       | 0.131 |       |       |       |       |       |       |       |       |       |       |       |    |       |       |       |        |       |       |       |
| PALB2    | 1122             | D/V               | 0.102 |       |       |       |       |       |       |       |       |       |       |       |       |       |       |       |       |    |       |       |       |        |       |       |       |
| PBRM1    | 258              | N/X               |       |       |       | 0.248 | 0.292 | 0.459 |       |       |       |       |       |       |       |       |       |       |       |    |       |       |       |        |       |       |       |
| PBRM1    | 298              | R/*               |       |       |       | 0.165 | 0.29  | 0.401 |       |       |       |       |       |       |       |       |       |       |       |    |       |       |       |        |       |       |       |
| PDCD1LG2 | 185              | P/X               |       |       |       | 0.148 | 0.142 | 0.316 |       |       |       |       |       |       |       |       |       |       |       |    |       |       |       |        |       |       |       |
| PIK3CA   | 545              | E/K               |       |       |       |       |       |       |       |       |       | 0.965 | 0.713 | 0.927 |       |       |       |       |       |    |       |       |       |        |       |       |       |
| PMS2     | 14               | A/T               |       |       |       |       |       | 0.129 |       |       |       |       |       |       |       |       |       |       |       |    |       |       |       |        |       |       |       |
| PMS2     | 451              | R/G               |       |       |       |       | 0.106 | 0.127 |       |       |       |       |       |       |       |       |       |       |       |    |       |       |       |        |       |       |       |
| PPP2R1A  | 221              | R/W               |       |       |       | 0.266 | 0.287 | 0.46  |       |       |       |       |       |       |       |       |       |       |       |    |       |       |       |        |       |       |       |
| PTEN     | 321              | T/X               |       |       |       | 0.236 | 0.324 | 0.389 |       |       |       |       |       |       |       |       |       |       |       |    |       |       |       |        |       |       |       |
| RAF1     | 452              | H/Q               |       |       |       | 0.158 | 0.321 | 0.397 |       |       |       |       |       |       |       |       |       |       |       |    |       |       |       |        |       |       |       |
| RNF43    | 132              | R/*               |       |       |       |       | 0.116 | 0.173 |       |       |       |       |       |       |       |       |       |       |       |    |       |       |       |        |       |       |       |
| RNF43    | 659              | G/X               |       |       |       | 0.209 | 0.266 | 0.298 |       |       |       |       |       |       |       |       |       |       |       |    |       |       |       |        |       |       |       |
| ROS1     | 750              | A/X               |       |       |       |       | 0.139 | 0.134 |       |       |       |       |       |       |       |       |       |       |       |    |       |       |       |        |       |       |       |
| SETD2    | 1955             | E/Q               |       |       |       |       |       |       | 0.417 | 0.4   | 0.402 |       |       |       |       |       |       |       |       |    |       |       |       |        |       |       |       |
| SETD2    | 2285             | Q/-               |       |       |       |       |       |       |       |       |       |       |       | 0.385 | 0.379 | 0.406 |       |       |       |    |       |       |       |        |       |       |       |
| SRSF2    | 95               | P/T               |       |       |       |       |       |       |       |       |       |       |       |       |       |       |       |       |       |    |       |       | 0.133 |        |       |       |       |
| TERT     | 112              | P/X               |       |       |       | 0.249 | 0.218 | 0.183 |       |       |       |       |       |       |       |       |       |       |       |    |       |       |       |        |       |       |       |
| TERT     | 537              | R/C               |       |       |       | 0.175 | 0.219 | 0.144 |       |       |       |       |       |       |       |       |       |       |       |    |       |       |       |        |       |       |       |
| TERT     | 614              | P/S               |       |       |       | 0.176 | 0.202 | 0.155 |       |       |       |       |       |       |       |       |       |       |       |    |       |       |       |        |       |       |       |
| TP53     | 175              | R/H               | 0.279 |       | 0.14  |       |       |       |       |       |       |       |       |       |       |       |       |       |       |    |       |       |       |        |       |       |       |
| TP53     | 195              | I/T               |       |       |       |       |       |       |       |       |       | 0.51  | 0.362 | 0.342 |       |       |       |       |       |    |       |       |       |        |       |       |       |
| TP53     | 213              | R/*               |       |       |       |       |       |       |       |       |       |       |       |       |       |       |       |       |       |    |       | 0.174 | 0.108 | 0.282  |       |       |       |
| TP53     | 266              | G/R               |       |       |       |       |       |       |       |       |       |       |       |       |       |       | 0.828 | 0.466 | 0.255 |    |       |       |       |        |       |       |       |
| TSC2     | 1424             | D/Y               |       |       |       | 0.207 | 0.24  | 0.3   |       |       |       |       |       |       |       |       |       |       |       |    |       |       |       |        |       |       |       |
| XPO1     | 1012-1014        | KEH/X             |       |       |       |       |       |       |       |       |       |       |       |       |       |       | 0.207 |       |       |    |       |       |       |        |       |       |       |
| ZNRF3    | 188              | A/V               |       |       |       | 0.228 | 0.322 | 0.436 |       |       |       |       |       |       |       |       |       |       |       |    |       |       |       |        |       |       |       |
