# Supplementary material for: Spatial profiling of gastric cancer patient-matched primary and locoregional metastases reveals principles of tumour dissemination
Source: PubMed Central journal article supplement — Gut. 2020 Nov 23;70(10):1823–32. doi: 10.1136/gutjnl-2020-320805 (PMC8458060; doi:10.1136/gutjnl-2020-320805), 2020-11-23
Supplement: gutjnl-2020-320805supp016.pdf [file gutjnl-2020-320805supp016.pdf]

| Patient Code | Year | Age | Sex    | T stage | N stage | Tumor Location | Tumor Grade | Lauren     | Surgery                         | EBV      | MMR        |
|--------------|------|-----|--------|---------|---------|----------------|-------------|------------|---------------------------------|----------|------------|
| TH182        | 1985 | 82  | Female | T2      | N2      | Distal         | G3          | Intestinal | partial or subtotal gastrectomy | negative | proficient |
| TH197        | 1986 | 66  | Male   | T3      | N2      | Distal         | G3          | Mixed      | total gastrectomy               | NA       | NA         |
| TH227        | 1993 | 35  | Male   | T4a     | N3a     | Distal         | G2          | Intestinal | total gastrectomy               | negative | proficient |
| TH265        | 1988 | 63  | Male   | T3      | N3a     | Proximal       | G3          | Intestinal | NA                              | negative | proficient |
| TH303        | 1990 | 75  | Female | T4a     | N2      | Stump          | G3          | Diffuse    | completion gastrectomy          | negative | proficient |
| TH305        | 1991 | 88  | Female | T4a     | N3a     | Distal         | G3          | Mixed      | partial or subtotal gastrectomy | negative | deficient  |
| TH307        | 1991 | NA  | Female | T3      | N2      | Distal         | G3          | Diffuse    | partial or subtotal gastrectomy | negative | proficient |
| TH327        | 1991 | 68  | Male   | T3      | N2      | Proximal       | G2          | Intestinal | total gastrectomy               | negative | proficient |
| TH335        | 1992 | 68  | Male   | T4a     | N3b     | Distal         | G3          | Diffuse    | total gastrectomy               | negative | proficient |
| TH336        | 1992 | 73  | Male   | T4a     | N2      | Distal         | G3          | Intestinal | total gastrectomy               | negative | proficient |
| TH337        | 1992 | 70  | Male   | T3      | N3b     | Distal         | G3          | Intestinal | partial or subtotal gastrectomy | negative | proficient |
| TH340        | 1992 | 75  | Female | T4a     | N2      | Proximal       | G2          | Intestinal | partial or subtotal gastrectomy | negative | proficient |
| TH352        | 1992 | 77  | Male   | T4a     | N3a     | Mid            | G3          | Mixed      | total gastrectomy               | negative | proficient |
| TH392        | 1993 | 77  | Female | T3      | N2      | Proximal       | G2          | Intestinal | partial or subtotal gastrectomy | negative | proficient |
| TH436        | 1994 | 68  | Male   | T4a     | N2      | Proximal       | G3          | Intestinal | total gastrectomy               | negative | deficient  |
| TH673        | 2000 | 77  | Male   | T3      | N1      | Proximal       | G3          | Intestinal | total gastrectomy               | negative | proficient |
| TH697        | 2001 | 77  | Female | T4a     | N1      | Mid            | G2          | Intestinal | total gastrectomy               | negative | proficient |
| TH202        | 1986 | 64  | Male   | T3      | N2      | Distal         | G3          | Intestinal | partial or subtotal gastrectomy | negative | proficient |
| TH668        | 2000 | 80  | Female | T4a     | N3a     | Distal         | G2          | Intestinal | partial or subtotal gastrectomy | negative | proficient |
| TH814        | 1990 | 57  | Male   | T4a     | N1      | Proximal       | G3          | Intestinal | total gastrectomy               | negative | proficient |
