# Supplementary material for: Spatial profiling of gastric cancer patient-matched primary and locoregional metastases reveals principles of tumour dissemination
Source: PubMed Central journal article supplement — Gut. 2020 Nov 23;70(10):1823–32. doi: 10.1136/gutjnl-2020-320805 (PMC8458060; doi:10.1136/gutjnl-2020-320805), 2020-11-23
Supplement: gutjnl-2020-320805supp017.pdf [file gutjnl-2020-320805supp017.pdf]

|       |      |        |         |         |         |        |        |        |        |        |        |        |        |        |        |        |        |        |
|-------|------|--------|---------|---------|---------|--------|--------|--------|--------|--------|--------|--------|--------|--------|--------|--------|--------|--------|
| TH730 | In   | normal | highamp | normal  | normal  | normal | normal | normal | normal | normal | normal | normal | normal | normal | normal | normal | normal | normal |
|       | sup  | normal | highamp | normal  | normal  | normal | normal | normal | loss   | normal | lowamp | normal | normal | lowamp | normal | normal | normal | normal |
|       | deep | normal | highamp | normal  | normal  | normal | normal | normal | normal | normal | lowamp | normal | normal | lowamp | normal | normal | normal | normal |
| TH737 | In   | normal | normal  | normal  | highamp | normal | loss   | normal | normal | normal | normal | normal | normal | lowamp | loss   | normal | normal | normal |
|       | sup  | normal | loss    | normal  | lowamp  | loss   | normal |
|       | deep | normal | normal  | normal  | highamp | normal | normal | normal | loss   | normal |
| TH752 | In   | normal | normal  | highamp | normal  | normal | normal | normal | normal | normal | normal | normal | normal | normal | normal | normal | normal | normal |
|       | sup  | normal | normal  | highamp | normal  | normal | normal | normal | normal | normal | normal | normal | normal | normal | normal | normal | normal | normal |
|       | deep | normal | normal  | lowamp  | normal  | normal | normal | normal | normal | normal | normal | normal | normal | normal | normal | normal | normal | normal |
| TH814 | In   | normal | highamp | normal  | normal  | normal | normal | normal | normal | loss   | normal |
|       | sup  | normal | highamp | normal  | normal  | normal | normal | normal | normal | normal | normal | normal | normal | normal | normal | normal | normal | normal |
|       | deep | normal | highamp | normal  | normal  | normal | normal | normal | normal | normal | normal | normal | normal | normal | normal | normal | normal | normal |
| TH82  | In   | normal | normal  | normal  | normal  | normal | normal | normal | normal | normal | normal | normal | normal | normal | normal | normal | normal | normal |
|       | sup  | normal | normal  | normal  | highamp | normal | lowamp | normal | normal | normal |
|       | deep | normal | normal  | normal  | normal  | normal | normal | normal | normal | normal | normal | normal | normal | normal | normal | normal | normal | normal |
