# Supplementary material for: Spatial profiling of gastric cancer patient-matched primary and locoregional metastases reveals principles of tumour dissemination
Source: PubMed Central journal article supplement — Gut. 2020 Nov 23;70(10):1823–32. doi: 10.1136/gutjnl-2020-320805 (PMC8458060; doi:10.1136/gutjnl-2020-320805), 2020-11-23
Supplement: gutjnl-2020-320805supp018.pdf [file gutjnl-2020-320805supp018.pdf]

| Sample | Subregion | Signet | Mucinous | Phenotype           | Spatial hetero |
|--------|-----------|--------|----------|---------------------|----------------|
| TH313  | ln        | no     | no       | non-poorly cohesive |                |
|        | sup1      | no     | no       | non-poorly cohesive |                |
|        | sup2      | no     | no       | non-poorly cohesive |                |
|        | deep      | no     | no       | non-poorly cohesive |                |
| TH308  | ln        | no     | no       | non-poorly cohesive |                |
|        | sup1      | no     | no       | non-poorly cohesive |                |
|        | sup2      | no     | yes      | non-poorly cohesive |                |
|        | deep      | no     | no       | non-poorly cohesive |                |
| TH301  | ln        | no     | no       | non-poorly cohesive |                |
|        | sup1      | no     | no       | non-poorly cohesive |                |
|        | sup2      | no     | no       | non-poorly cohesive |                |
|        | deep      | no     | no       | non-poorly cohesive |                |
| TH311  | sup1      | no     | no       | non-poorly cohesive |                |
|        | sup2      | no     | no       | non-poorly cohesive |                |
|        | deep      | no     | no       | non-poorly cohesive |                |
| TH293  | ln        | no     | no       | non-poorly cohesive |                |
|        | sup1      | no     | no       | non-poorly cohesive |                |
|        | deep      | no     | no       | non-poorly cohesive |                |
| TH286  | ln        | no     | no       | poorly cohesive     |                |
|        | sup1      | no     | no       | poorly cohesive     |                |
|        | deep      | no     | no       | poorly cohesive     |                |
| TH195  | sup1      | no     | no       | non-poorly cohesive |                |
|        | sup2      | no     | no       | non-poorly cohesive |                |
|        | deep      | no     | no       | non-poorly cohesive |                |
| TH263  | ln        | no     | no       | non-poorly cohesive |                |
|        | sup1      | no     | no       | non-poorly cohesive |                |
|        | sup2      | no     | no       | non-poorly cohesive |                |
|        | deep      | no     | no       | non-poorly cohesive |                |
| TH82   | ln        | no     | no       | non-poorly cohesive |                |
|        | sup1      | no     | no       | non-poorly cohesive |                |
|        | sup2      | no     | no       | non-poorly cohesive |                |
|        | deep      | no     | no       | non-poorly cohesive |                |
| TH211  | ln        | no     | no       | non-poorly cohesive |                |
|        | sup1      | no     | no       | non-poorly cohesive |                |
|        | sup2      | no     | no       | non-poorly cohesive |                |
|        | deep      | no     | no       | non-poorly cohesive |                |
| TH271  | ln        | no     | no       | poorly cohesive     |                |
|        | sup1      | no     | no       | poorly cohesive     |                |
|        | sup2      | no     | no       | poorly cohesive     |                |
|        | deep      | no     | no       | poorly cohesive     |                |
| TH112  | ln        | no     | no       | non-poorly cohesive |                |
|        | sup1      | no     | no       | non-poorly cohesive |                |
|        | sup2      | no     | no       | non-poorly cohesive |                |
|        | deep      | no     | no       | non-poorly cohesive |                |

|        |      |     |    |                     |     |
|--------|------|-----|----|---------------------|-----|
| TH245  | In   | no  | no | non-poorly cohesive |     |
|        | sup1 | no  | no | non-poorly cohesive |     |
|        | sup2 | no  | no | non-poorly cohesive |     |
|        | deep | no  | no | non-poorly cohesive |     |
| TH257  | In   | no  | no | non-poorly cohesive |     |
|        | sup1 | no  | no | non-poorly cohesive |     |
|        | sup2 | no  | no | non-poorly cohesive |     |
|        | deep | no  | no | non-poorly cohesive |     |
| Th126  | In   | no  | no | non-poorly cohesive |     |
|        | sup1 | no  | no | non-poorly cohesive |     |
|        | sup2 | no  | no | non-poorly cohesive |     |
|        | deep | no  | no | non-poorly cohesive |     |
| TH375  | In   | no  | no | non-poorly cohesive |     |
|        | sup1 | no  | no | non-poorly cohesive |     |
|        | sup2 | no  | no | non-poorly cohesive |     |
|        | deep | no  | no | non-poorly cohesive |     |
| TH316  | In   | no  | no | non-poorly cohesive |     |
|        | sup1 | no  | no | non-poorly cohesive |     |
|        | sup2 | no  | no | non-poorly cohesive |     |
|        | deep | no  | no | non-poorly cohesive |     |
| TH357  | In   | <10 | no | poorly cohesive     |     |
|        | sup1 | <10 | no | poorly cohesive     |     |
|        | sup2 | <10 | no | poorly cohesive     |     |
|        | deep | <10 | no | poorly cohesive     |     |
| TH351  | In   | no  | no | non-poorly cohesive |     |
|        | sup1 | no  | no | non-poorly cohesive |     |
|        | sup2 | no  | no | non-poorly cohesive |     |
|        | deep | no  | no | non-poorly cohesive |     |
| TH377  | sup1 | <10 | no | poorly cohesive     |     |
|        | sup2 | <10 | no | poorly cohesive     |     |
|        | deep | <10 | no | poorly cohesive     |     |
| TH325  | sup1 | no  | no | non-poorly cohesive |     |
|        | sup2 | no  | no | non-poorly cohesive |     |
|        | deep | no  | no | non-poorly cohesive |     |
| TH366  | sup1 | no  | no | non-poorly cohesive |     |
|        | sup2 | no  | no | non-poorly cohesive |     |
|        | deep | no  | no | non-poorly cohesive |     |
| TH339  | In   | no  | no | non-poorly cohesive | Yes |
|        | sup1 | <10 | no | poorly cohesive     |     |
|        | sup2 | no  | no | non-poorly cohesive |     |
| Th347  | In   | <10 | no | poorly cohesive     |     |
|        | sup2 | <10 | no | poorly cohesive     |     |
|        | sup1 | <10 | no | poorly cohesive     |     |
|        | deep | <10 | no | poorly cohesive     |     |
| TH1000 | In   | no  | no | poorly cohesive     | Yes |
|        | sup1 | no  | no | non-poorly cohesive |     |

|       |      |        |     |                     |     |
|-------|------|--------|-----|---------------------|-----|
|       | sup2 | no     | no  | non-poorly cohesive |     |
|       | deep | no     | no  | non-poorly cohesive |     |
| TH689 | ln   | no     | no  | non-poorly cohesive |     |
|       | sup1 | no     | no  | non-poorly cohesive |     |
|       | sup2 | no     | no  | non-poorly cohesive |     |
|       | deep | no     | no  | non-poorly cohesive |     |
| TH358 | sup1 | no     | no  | non-poorly cohesive |     |
|       | sup2 | no     | no  | non-poorly cohesive |     |
|       | deep | no     | no  | non-poorly cohesive |     |
| TH691 | ln   | >90    | no  | poorly cohesive     |     |
|       | sup1 | >10-90 | no  | poorly cohesive     |     |
|       | sup2 | >10-90 | no  | poorly cohesive     |     |
| TH705 | sup1 | <10    | no  | poorly cohesive     |     |
|       | sup2 | <10    | no  | poorly cohesive     |     |
|       | deep | >10-90 | no  | poorly cohesive     |     |
| TH765 | ln   | no     | yes | mucinous            |     |
|       | sup1 | no     | yes | mucinous            |     |
|       | deep | no     | yes | mucinous            |     |
| TH657 | ln   | <10    | no  | poorly cohesive     | Yes |
|       | sup1 | no     | no  | non-poorly cohesive |     |
|       | sup2 | <10    | no  | poorly cohesive     |     |
|       | deep | >10-90 | no  | poorly cohesive     |     |
| TH630 | ln   | no     | no  | non-poorly cohesive | Yes |
|       | sup1 | no     | no  | non-poorly cohesive |     |
|       | sup2 | no     | no  | non-poorly cohesive |     |
|       | deep | >10-90 | no  | poorly cohesive     |     |
| TH201 | ln   | no     | no  | non-poorly cohesive |     |
|       | sup1 | no     | no  | non-poorly cohesive |     |
|       | sup2 | no     | no  | non-poorly cohesive |     |
|       | deep | no     | no  | non-poorly cohesive |     |
| TH391 | sup1 | no     | no  | non-poorly cohesive |     |
|       | sup2 | no     | no  | non-poorly cohesive |     |
|       | deep | no     | no  | non-poorly cohesive |     |
| TH752 | ln   | no     | no  | non-poorly cohesive |     |
|       | sup1 | no     | no  | non-poorly cohesive |     |
|       | deep | no     | no  | non-poorly cohesive |     |
| TH370 | sup1 | <10    | no  | poorly cohesive     |     |
|       | sup2 | <10    | no  | poorly cohesive     |     |
|       | deep | <10    | no  | poorly cohesive     |     |
| TH439 | sup1 | no     | no  | non-poorly cohesive |     |
|       | sup2 | no     | no  | non-poorly cohesive |     |
| TH589 | ln   | <10    | no  | poorly cohesive     |     |
| TH660 | ln   | <10    | no  | poorly cohesive     |     |
|       | sup1 | <10    | no  | poorly cohesive     |     |
|       | sup2 | <10    | no  | poorly cohesive     |     |
|       | deep | <10    | no  | poorly cohesive     |     |

|       |      |     |     |                     |     |
|-------|------|-----|-----|---------------------|-----|
| TH449 | ln   | no  | no  | non-poorly cohesive |     |
|       | sup1 | no  | no  | non-poorly cohesive |     |
|       | sup2 | no  | no  | non-poorly cohesive |     |
|       | deep | no  | no  | non-poorly cohesive |     |
| TH684 | ln   | no  | no  | non-poorly cohesive |     |
|       | sup1 | no  | no  | non-poorly cohesive |     |
|       | sup2 | no  | no  | non-poorly cohesive |     |
|       | deep | no  | no  | non-poorly cohesive |     |
| TH418 | ln   | no  | no  | non-poorly cohesive |     |
|       | sup1 | no  | no  | non-poorly cohesive |     |
|       | sup2 | no  | no  | non-poorly cohesive |     |
|       | deep | no  | no  | non-poorly cohesive |     |
| TH420 | ln   | no  | no  | non-poorly cohesive |     |
|       | sup1 | no  | no  | non-poorly cohesive |     |
|       | sup2 | no  | no  | non-poorly cohesive |     |
|       | deep | no  | no  | non-poorly cohesive |     |
| TH737 | ln   | no  | no  | non-poorly cohesive |     |
|       | sup1 | no  | no  | non-poorly cohesive |     |
|       | sup2 | no  | no  | non-poorly cohesive |     |
|       | deep | no  | no  | non-poorly cohesive |     |
| TH276 | ln   | no  | yes | mucinous            | Yes |
|       | sup1 | no  | yes | mucinous            |     |
|       | sup2 | no  | no  | non-poorly cohesive |     |
|       | deep | no  | no  | non-poorly cohesive |     |
| TH309 | ln   | no  | no  | non-poorly cohesive |     |
|       | sup1 | no  | no  | non-poorly cohesive |     |
|       | sup2 | no  | no  | non-poorly cohesive |     |
|       | deep | no  | no  | non-poorly cohesive |     |
| TH128 | ln   | no  | no  | poorly cohesive     |     |
|       | sup1 | no  | no  | poorly cohesive     |     |
|       | sup2 | no  | no  | poorly cohesive     |     |
|       | deep | no  | no  | poorly cohesive     |     |
| TH387 | ln   | <10 | no  | poorly cohesive     | Yes |
|       | sup1 | no  | no  | non-poorly cohesive |     |
|       | deep | <10 | no  | poorly cohesive     |     |
| TH266 | ln   | no  | no  | non-poorly cohesive |     |
|       | sup1 | no  | no  | non-poorly cohesive |     |
|       | deep | no  | no  | non-poorly cohesive |     |
| TH314 | ln   | no  | no  | non-poorly cohesive |     |
|       | sup1 | no  | no  | non-poorly cohesive |     |
|       | sup2 | no  | no  | non-poorly cohesive |     |
| TH803 | sup1 | <10 | no  | poorly cohesive     |     |
|       | sup2 | <10 | no  | poorly cohesive     |     |
|       | deep | <10 | no  | poorly cohesive     |     |
| TH720 | ln   | no  | no  | non-poorly cohesive |     |
|       | sup1 | no  | no  | non-poorly cohesive |     |

|       |       |        |     |                     |     |
|-------|-------|--------|-----|---------------------|-----|
| TH300 | sup2  | no     | no  | non-poorly cohesive |     |
|       | deep  | no     | no  | non-poorly cohesive |     |
| TH659 | ln    | no     | yes | mucinous            |     |
|       | sup1  | no     | yes | mucinous            |     |
|       | sup2  | no     | yes | mucinous            |     |
|       | deep  | no     | yes | mucinous            |     |
| TH329 | ln    | no     | no  | non-poorly cohesive | Yes |
|       | sup1  | no     | no  | non-poorly cohesive |     |
|       | sup2  | no     | no  | non-poorly cohesive |     |
|       | deep  | <10    | no  | poorly cohesive     |     |
| TH196 | ln    | no     | no  | non-poorly cohesive |     |
|       | sup1  | no     | no  | non-poorly cohesive |     |
| TH679 | sup1  | no     | no  | non-poorly cohesive |     |
|       | sup2  | no     | no  | non-poorly cohesive |     |
|       | deep  | no     | no  | non-poorly cohesive |     |
| TH194 | ln    | no     | no  | non-poorly cohesive |     |
|       | sup1  | no     | no  | non-poorly cohesive |     |
|       | deep  | no     | no  | non-poorly cohesive |     |
| TH300 | ln    | no     | no  | non-poorly cohesive |     |
|       | sup1  | no     | no  | non-poorly cohesive |     |
|       | sup2  | no     | no  | non-poorly cohesive |     |
|       | deep  | no     | no  | non-poorly cohesive |     |
| TH306 | ln    | >10-90 | no  | poorly cohesive     |     |
|       | sup1  | >10-90 | no  | poorly cohesive     |     |
|       | sup2  | >10-90 | no  | poorly cohesive     |     |
|       | deep  | >90    | no  | poorly cohesive     |     |
| TH282 | ln    | no     | no  | non-poorly cohesive | Yes |
|       | sup1  | no     | no  | non-poorly cohesive |     |
|       | sup2  | no     | no  | non-poorly cohesive |     |
|       | deep  | >10-90 | no  | poorly cohesive     |     |
| TH295 | ln    | no     | no  | non-poorly cohesive |     |
|       | sup1  | no     | no  | non-poorly cohesive |     |
|       | sup2  | no     | no  | non-poorly cohesive |     |
|       | deep  | no     | no  | non-poorly cohesive |     |
| TH189 | sup1  | >90    | no  | poorly cohesive     |     |
| TH183 | ln    | <10    | no  | poorly cohesive     |     |
|       | sup1  | <10    | no  | poorly cohesive     |     |
|       | sup2  | <10    | no  | poorly cohesive     |     |
|       | deep  | <10    | no  | poorly cohesive     |     |
|       | sup3  | <10    | no  | poorly cohesive     |     |
|       | sup4  | <10    | no  | poorly cohesive     |     |
|       | deep2 | <10    | no  | poorly cohesive     |     |
| TH712 | ln    | no     | no  | non-poorly cohesive |     |
|       | sup2  | no     | no  | non-poorly cohesive |     |
|       | sup1  | no     | no  | non-poorly cohesive |     |
|       | deep  | no     | no  | non-poorly cohesive |     |
